# Supplementary material for: Specific impacts of beech and Norway spruce on the structure and diversity of the rhizosphere and soil microbial communities
Source: PubMed Central journal article supplement (PMC4908602; doi:10.1038/srep27756), 2016-06-15
Supplement: srep27756-s1.pdf [file srep27756-s1.pdf]

Supplementary figures of the manuscript entitled:

Specific impacts of beech and Norway spruce on the structure and diversity of the rhizosphere and soil microbial communities

Uroz S.<sup>1ab,2</sup>, Oger P.<sup>3</sup>, Tisserand E.<sup>1</sup>, Cébron A.<sup>4,5</sup>, Turpault M-P.<sup>2</sup>, Buée M.<sup>1</sup>, De Boer W.<sup>6</sup>, Leveau J.H.J.<sup>7</sup>, and P. Frey-Klett<sup>1</sup>

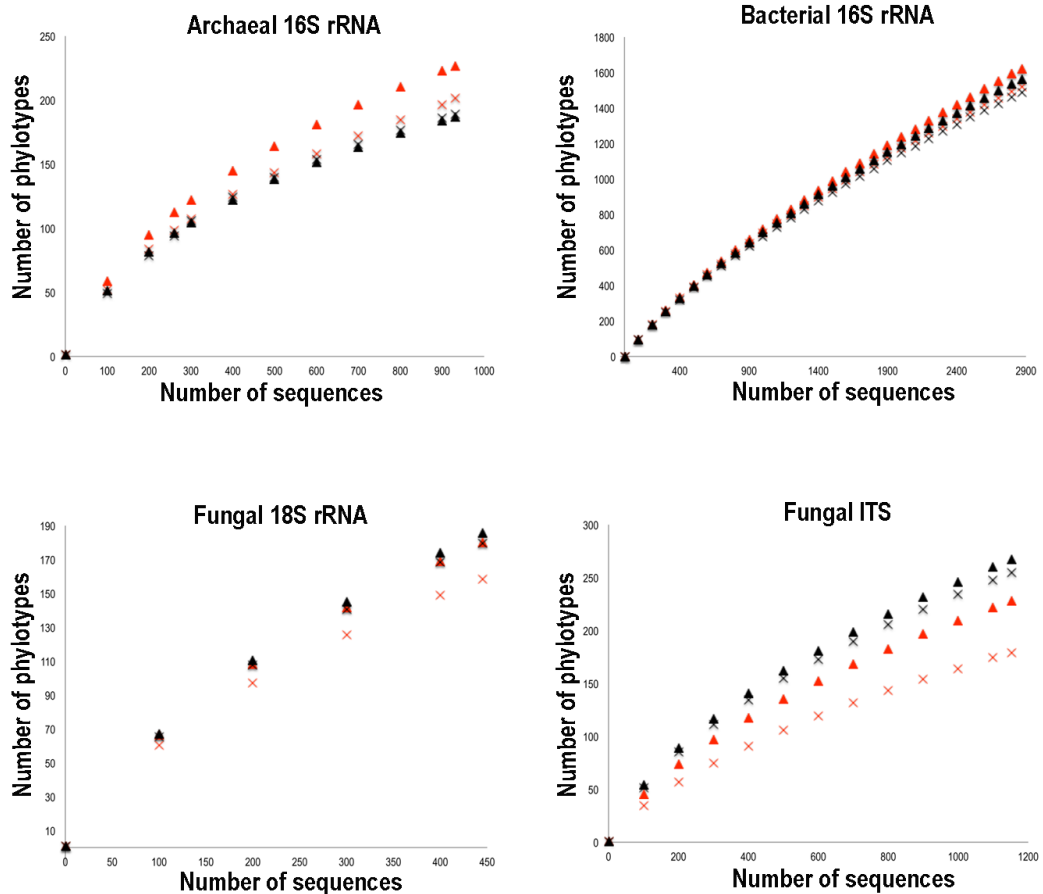

**Figure S1: Rarefaction analyses.** For each organism type, red symbols correspond to beech (B) samples coming from the bulk soil (red triangle) and the rhizosphere (red cross). Black symbols correspond to Norway spruce (NW) samples coming from the bulk soil (black triangle) and the rhizosphere (black cross).

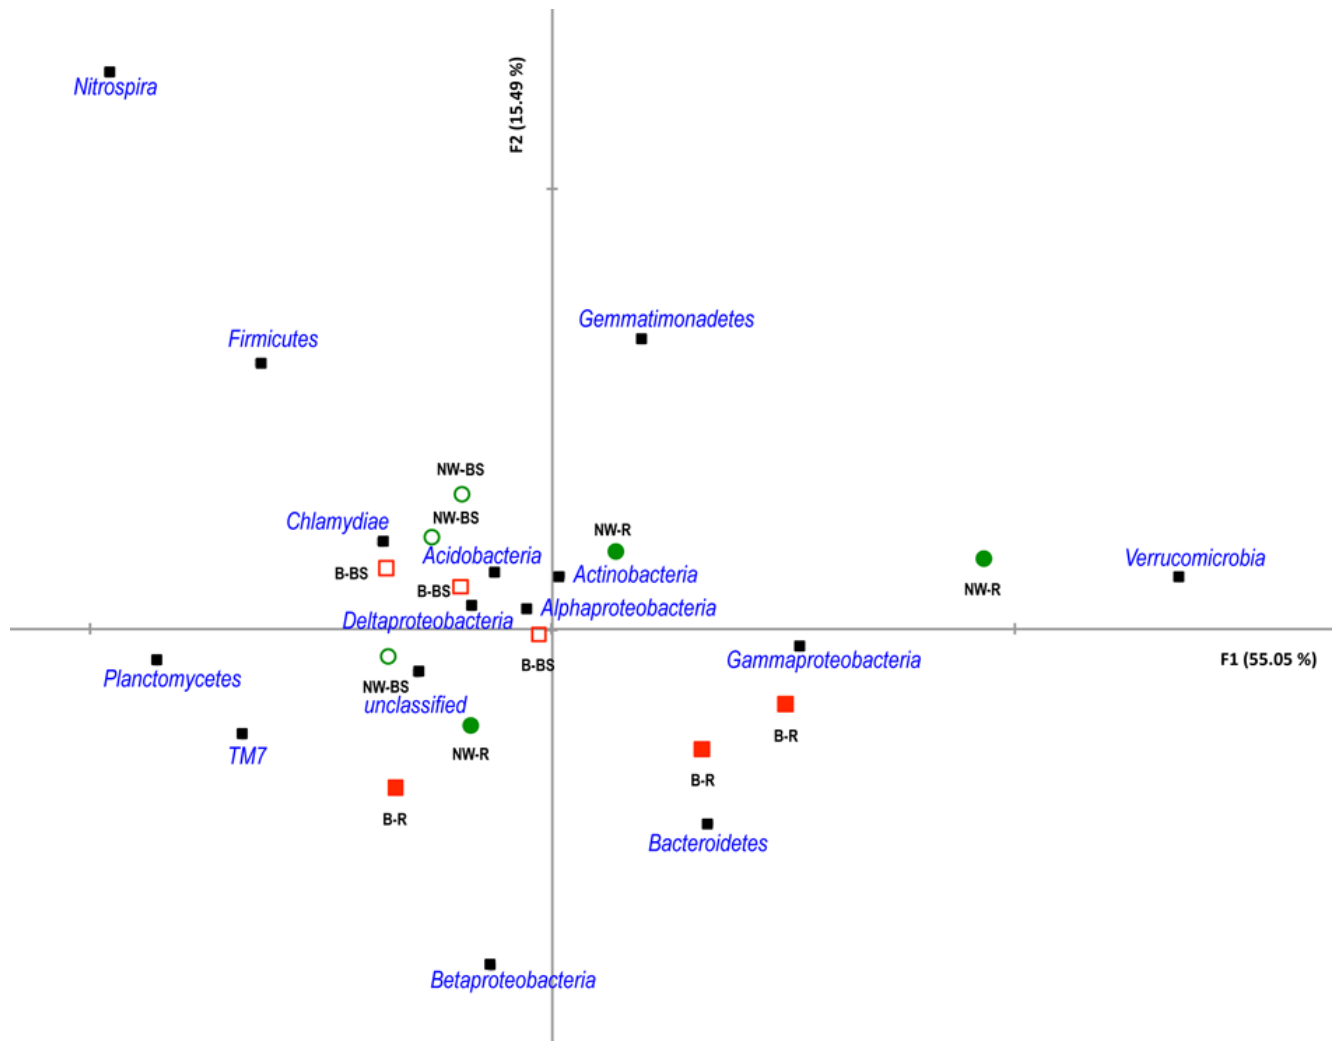

**Figure S2: Multifactorial analysis of the relative proportion of the major bacterial phyla present in the rhizosphere and surrounding bulk soil under beech and Norway spruce stands.** Green circle symbols correspond to Norway Spruce (NW) samples coming from the bulk soil (NW-BS ; open circle) and the rhizosphere (NW-R ; filled circle). Red square symbols correspond to Beech (B) samples coming from the bulk soil (B-BS ; open square) and the rhizosphere (B-R ; filled square). Vector position of the main phyla is presented by black squares.

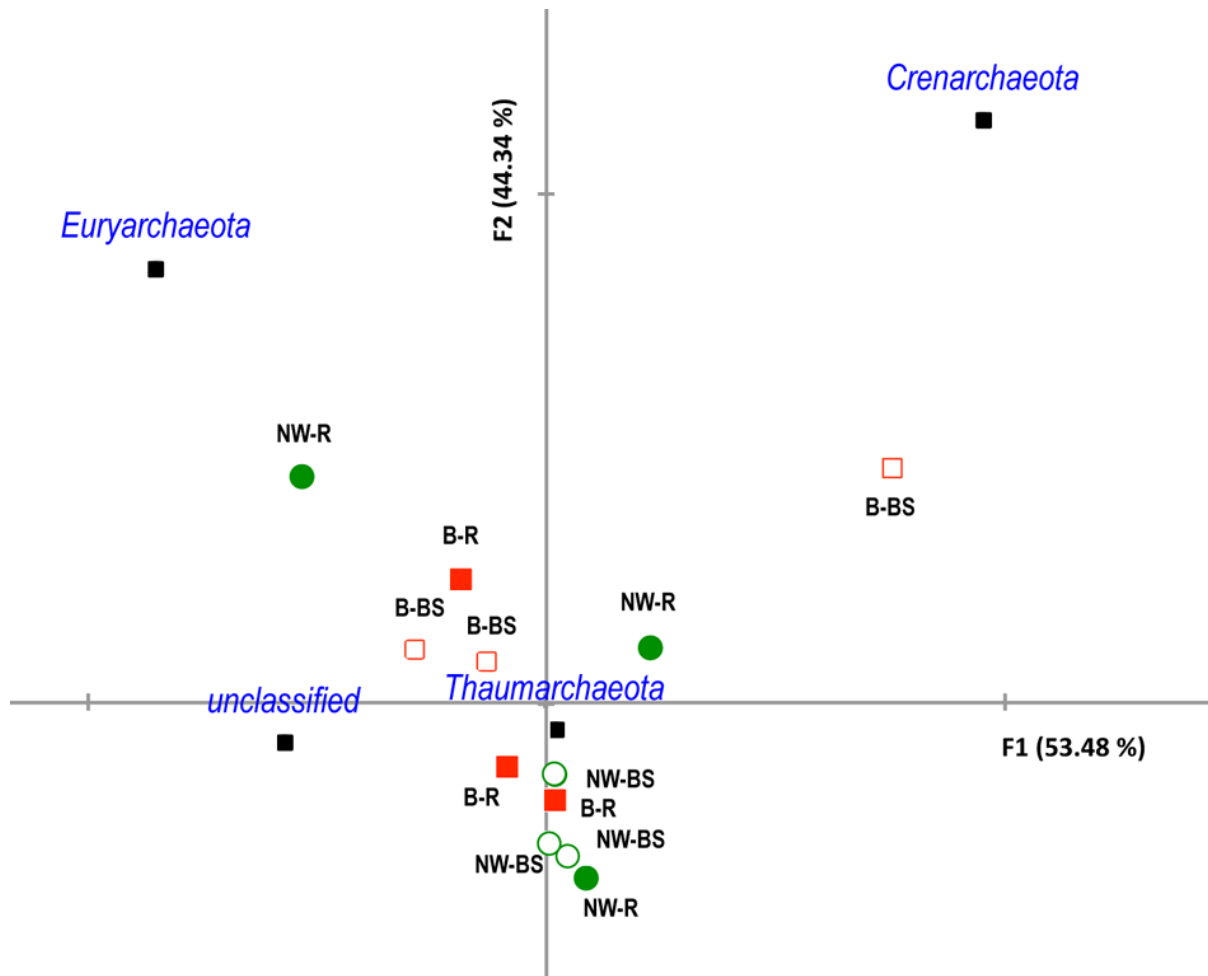

**Figure S3: Multifactorial analysis of the relative proportion of the major archaeal phyla present in the rhizosphere and surrounding bulk soil under beech and Norway spruce stands.** Green circle symbols correspond to Norway Spruce (NW) samples coming from the bulk soil (NW-BS ; open circle) and the rhizosphere (NW-R ; filled circle). Red square symbols correspond to Beech (B) samples coming from the bulk soil (B-BBS ; open square) and the rhizosphere (B-R ; filled square). Vector position of the main phyla is presented by black squares.

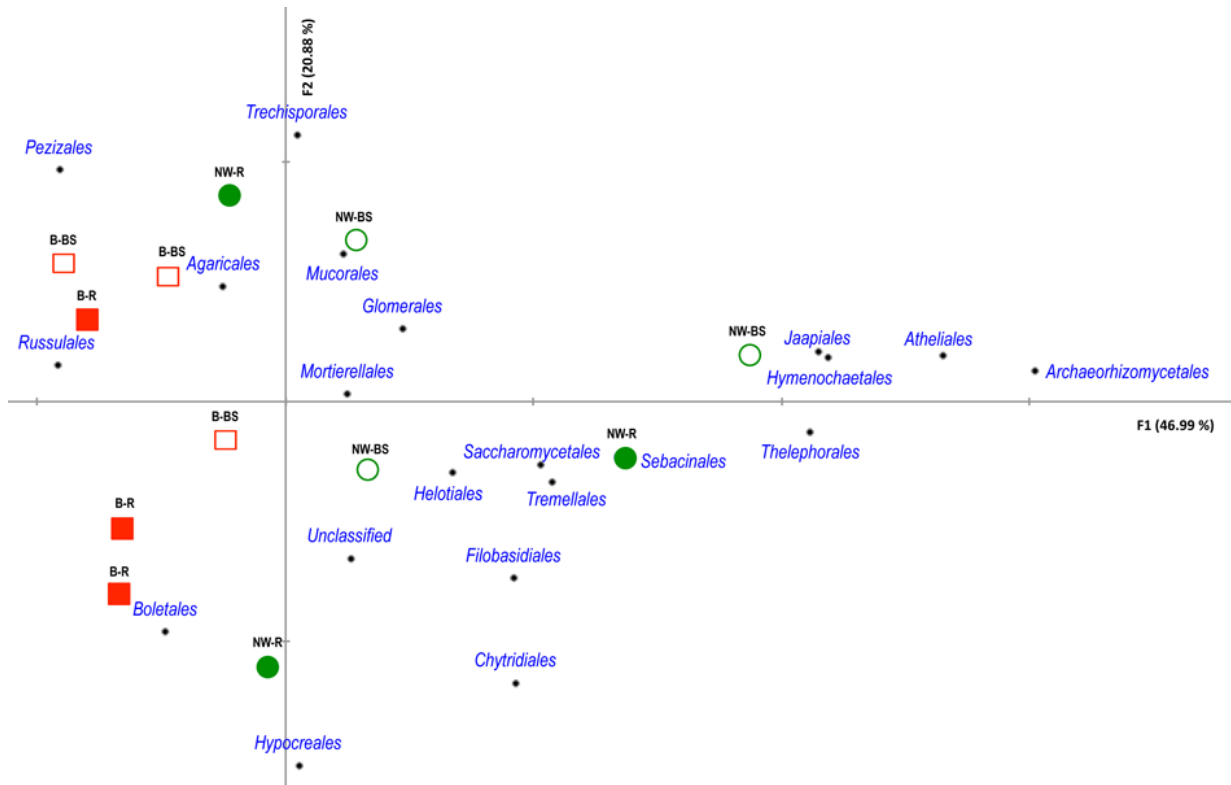

**Figure S4: Multifactorial analysis of the relative proportion of the major fungal phyla (according to 18S rRNA assignment) present in the rhizosphere and surrounding bulk soil under beech and Norway spruce stands.** Green circle symbols correspond to Norway Spruce (NW) samples coming from the bulk soil (NW-BS ; open circle) and the rhizosphere (NW-R ; filed circle). Red square symbols correspond to Beech (B) samples coming from the bulk soil (B-BS ; open square) and the rhizosphere (B-R ; filed square). Vector position of the main phyla is presented by black squares.

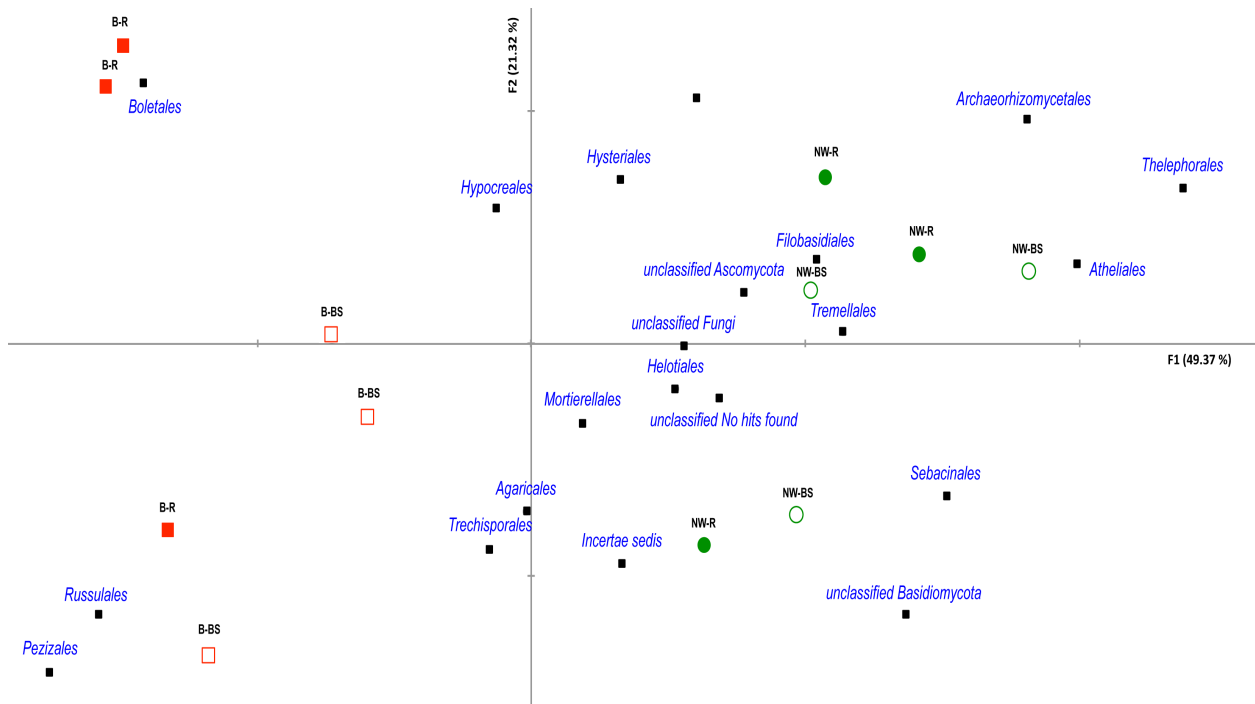

**Figure S5: Multifactorial analysis of the relative proportion of the major fungal phyla (according to ITS assignation) present in the rhizosphere and surrounding bulk soil under beech and Norway spruce stands.** Green circle symbols correspond to Norway Spruce (NW) samples coming from the bulk soil (NW-BS ; open circle) and the rhizosphere (NW-R ; filled circle). Red square symbols correspond to Beech (B) samples coming from the bulk soil (B-BS ; open square) and the rhizosphere (B-R ; filled square). Vector position of the main phyla is presented by black squares.

**Table S1: presentation of the raw data**

| <b>BACTERIA</b> | sample       | raw    | q25    | q25= quality of 25 |
|-----------------|--------------|--------|--------|--------------------|
| H1R             | 1            | 4315   | 2912   |                    |
| H1BS            | 2            | 10986  | 7846   |                    |
| H2R             | 3            | 21077  | 14517  |                    |
| H2BS            | 4            | 49961  | 37617  |                    |
| H4R             | 5            | 23987  | 17819  |                    |
| H4BS            | 6            | 27595  | 19908  |                    |
| E2R             | 7            | 4442   | 2869   |                    |
| E2BS            | 8            | 32206  | 23537  |                    |
| E3R             | 9            | 28678  | 21542  |                    |
| E3BS            | 10           | 19358  | 13960  |                    |
| E4R             | 11           | 33256  | 24614  |                    |
| E4BS            | 12           | 24033  | 16335  |                    |
|                 | <i>total</i> | 279894 | 203476 |                    |

| <b>ARCHAEA</b> | sample       | raw   | q25   |  |
|----------------|--------------|-------|-------|--|
| H1R            | 1            | 3128  | 932   |  |
| H1BS           | 2            | 3367  | 966   |  |
| H2R            | 3            | 10692 | 2471  |  |
| H2BS           | 4            | 20118 | 7127  |  |
| H4R            | 5            | 4806  | 1702  |  |
| H4BS           | 6            | 7297  | 2287  |  |
| E2R            | 7            | 2433  | 261   |  |
| E2BS           | 8            | 5117  | 1590  |  |
| E3R            | 9            | 7727  | 3221  |  |
| E3BS           | 10           | 9729  | 3155  |  |
| E4R            | 11           | 3033  | 1364  |  |
| E4BS           | 12           | 7273  | 1310  |  |
|                | <i>total</i> | 84720 | 26386 |  |

| <b>18S rRNA</b> | sample | raw  | q25  |  |
|-----------------|--------|------|------|--|
| H1R             | 1      | 1167 | 553  |  |
| H1BS            | 2      | 2779 | 1369 |  |
| H2R             | 3      | 5899 | 2889 |  |
| H2BS            | 4      | 3542 | 1803 |  |
| H4R             | 5      | 850  | 445  |  |
| H4BS            | 6      | 4780 | 1561 |  |
| E2R             | 7      | 1534 | 772  |  |

|              |    |              |              |
|--------------|----|--------------|--------------|
| E2BS         | 8  | 1023         | 501          |
| E3R          | 9  | 4303         | 1968         |
| E3BS         | 10 | 1555         | 671          |
| E4R          | 11 | 3347         | 1505         |
| E4BS         | 12 | 1258         | 570          |
| <i>total</i> |    | <i>32037</i> | <i>14607</i> |

| <b>ITS</b>   | sample | raw | q25          | q25 and ITSx |              |
|--------------|--------|-----|--------------|--------------|--------------|
| H1R          |        | 1   | 1802         | 1772         | 1374         |
| H1BS         |        | 2   | 1524         | 1494         | 1153         |
| H2R          |        | 3   | 3082         | 3044         | 2165         |
| H2BS         |        | 4   | 4234         | 4155         | 2989         |
| H4R          |        | 5   | 2205         | 2174         | 1538         |
| H4BS         |        | 6   | 2152         | 2136         | 1783         |
| E2R          |        | 7   | 1640         | 1607         | 1365         |
| E2BS         |        | 8   | 2983         | 2929         | 2270         |
| E3R          |        | 9   | 5456         | 5397         | 2193         |
| E3BS         |        | 10  | 2844         | 2800         | 2258         |
| E4R          |        | 11  | 4360         | 4302         | 3476         |
| E4BS         |        | 12  | 2524         | 2493         | 1976         |
| <i>total</i> |        |     | <i>34806</i> | <i>34303</i> | <i>24540</i> |







**Table S2: Details of the diversity and richness values**

A/ in average

| <b>Archaea</b>     | <b>NW-BS</b> | <b>NW-R</b> | <b>B-BS</b> | <b>B-R</b> |
|--------------------|--------------|-------------|-------------|------------|
| OTU Obs            | 183          | 198         | 224         | 204        |
| shannon            | 4.09         | 4.17        | 4.49        | 4.30       |
| chao               | 293.66       | 306.06      | 363.25      | 337.17     |
| <b>Bacteria</b>    |              |             |             |            |
| OTU Obs            | 1578         | 1478        | 1568        | 1523       |
| shannon            | 6.92         | 6.83        | 6.93        | 6.91       |
| chao               | 5064.12      | 4702.17     | 5012.04     | 4390.78    |
| <b>Fungi (18S)</b> |              |             |             |            |
| OTU Obs            | 187          | 180         | 181         | 156        |
| shannon            | 4.68         | 4.63        | 4.69        | 4.40       |
| chao               | 384.49       | 371.40      | 356.10      | 305.96     |
| <b>Fungi (ITS)</b> |              |             |             |            |
| OTU Obs            | 297          | 250         | 278         | 174        |
| shannon            | 4.33         | 4.18        | 3.91        | 3.11       |
| chao               | 598.2        | 545.4       | 474.0       | 417.9      |

B/ in detail sample per sample

| <b>ARCHAEA</b> | <b>chao</b> | chao_lci | chao_hci | <b>shannon</b> | shannon_lci | shannon_hci | <b>OTU Richness</b> |
|----------------|-------------|----------|----------|----------------|-------------|-------------|---------------------|
| E2BS           | 307.52      | 260.54   | 388.67   | 3.99           | 3.86        | 4.11        | 194                 |
| E3BS           | 310.84      | 259.63   | 400.15   | 4.21           | 4.11        | 4.32        | 184                 |
| E4BS           | 262.63      | 222.23   | 336.18   | 4.06           | 3.95        | 4.17        | 231                 |
| E3R            | 366.11      | 308.37   | 462.29   | 4.35           | 4.24        | 4.46        | 172                 |
| E4R            | 246.01      | 203.79   | 326.08   | 3.98           | 3.88        | 4.09        | 165                 |
| H1BS           | 410.30      | 350.70   | 505.70   | 4.71           | 4.62        | 4.81        | 250                 |
| H4BS           | 313.16      | 266.47   | 393.48   | 4.28           | 4.18        | 4.39        | 243                 |
| H2BS           | 366.30      | 311.17   | 457.21   | 4.48           | 4.38        | 4.58        | 218                 |
| H1R            | 391.22      | 334.22   | 483.84   | 4.67           | 4.58        | 4.77        | 193                 |
| H2R            | 331.11      | 272.96   | 431.98   | 4.26           | 4.16        | 4.36        | 205                 |
| H4R            | 289.18      | 234.46   | 388.47   | 3.98           | 3.87        | 4.08        | 176                 |

| <b>BACTERIA</b> | <b>chao</b> | chao_lci | chao_hci | <b>shannon</b> | shannon_lci | shannon_hci | <b>OTU Richness</b> |
|-----------------|-------------|----------|----------|----------------|-------------|-------------|---------------------|
| E2BS            | 5305.53     | 4702.08  | 6028.23  | 7.05           | 7.01        | 7.09        | 1607                |
| E3BS            | 3076.93     | 2745.08  | 3483.15  | 6.59           | 6.54        | 6.64        | 1199                |
| E4BS            | 6809.89     | 5994.47  | 7783.19  | 7.11           | 7.07        | 7.16        | 1308                |
| E2R             | 2590.73     | 2330.94  | 2910.14  | 6.57           | 6.53        | 6.61        | 1462                |
| E3R             | 4774.98     | 4199.65  | 5472.25  | 6.80           | 6.75        | 6.85        | 1818                |
| E4R             | 6740.79     | 5940.64  | 7695.20  | 7.14           | 7.09        | 7.18        | 1772                |
| H1BS            | 5394.55     | 4791.24  | 6114.83  | 7.06           | 7.02        | 7.10        | 1659                |
| H2BS            | 6350.89     | 5587.33  | 7265.22  | 7.06           | 7.02        | 7.11        | 1570                |
| H4BS            | 3290.68     | 2929.95  | 3731.50  | 6.67           | 6.63        | 6.72        | 1718                |
| H1R             | 4243.23     | 3804.83  | 4767.44  | 6.96           | 6.92        | 7.00        | 1402                |
| H2R             | 3674.56     | 3279.34  | 4153.37  | 6.82           | 6.77        | 6.86        | 1327                |
| H4R             | 5254.56     | 4633.04  | 6002.77  | 6.94           | 6.90        | 6.99        | 1598                |

| <b>18S rRNA</b> | <b>chao</b> | chao_lci | chao_hci | <b>shannon</b> | shannon_lci | shannon_hci | <b>OTU Richness</b> |
|-----------------|-------------|----------|----------|----------------|-------------|-------------|---------------------|
| E2BS            | 376.70      | 302.55   | 500.29   | 4.81           | 4.70        | 4.91        | 193                 |
| E3BS            | 370.04      | 292.55   | 500.83   | 4.65           | 4.54        | 4.76        | 166                 |
| E4BS            | 406.71      | 318.00   | 554.84   | 4.57           | 4.44        | 4.70        | 185                 |
| E2R             | 329.51      | 264.64   | 440.89   | 4.66           | 4.55        | 4.76        | 178                 |
| E3R             | 333.52      | 263.02   | 455.56   | 4.48           | 4.35        | 4.60        | 184                 |
| E4R             | 451.17      | 351.40   | 615.57   | 4.76           | 4.65        | 4.88        | 195                 |
| H1BS            | 400.28      | 324.21   | 524.38   | 4.90           | 4.80        | 5.01        | 199                 |
| H2BS            | 372.28      | 292.20   | 508.34   | 4.65           | 4.54        | 4.76        | 134                 |
| H4BS            | 295.74      | 237.36   | 398.17   | 4.52           | 4.41        | 4.63        | 174                 |
| H1R             | 220.01      | 179.51   | 295.72   | 4.02           | 3.87        | 4.16        | 164                 |
| H2R             | 361.70      | 282.83   | 497.13   | 4.58           | 4.47        | 4.70        | 171                 |
| H4R             | 336.16      | 267.48   | 453.23   | 4.61           | 4.50        | 4.71        | 170                 |

| <b>ITS</b> | <b>chao</b> | chao_lci | chao_hci | <b>shannon</b> | shannon_lci | shannon_hci | <b>OTU Richness</b> |
|------------|-------------|----------|----------|----------------|-------------|-------------|---------------------|
| E2BS       | 568.34      | 449.60   | 757.07   | 4.10           | 3.99        | 4.21        | 323                 |
| E3BS       | 538.73      | 429.39   | 714.77   | 4.30           | 4.20        | 4.40        | 215                 |
| E4BS       | 687.60      | 554.72   | 891.23   | 4.60           | 4.50        | 4.70        | 254                 |
| E2R        | 457.93      | 363.23   | 614.56   | 3.82           | 3.71        | 3.94        | 240                 |
| E3R        | 520.65      | 416.82   | 686.81   | 4.08           | 3.98        | 4.19        | 313                 |
| E4R        | 657.75      | 534.00   | 847.64   | 4.63           | 4.53        | 4.73        | 294                 |
| H1BS       | 480.60      | 396.82   | 610.90   | 4.01           | 3.90        | 4.12        | 322                 |
| H2BS       | 512.60      | 403.25   | 690.44   | 3.95           | 3.84        | 4.06        | 176                 |
| H4BS       | 428.75      | 344.28   | 566.73   | 3.78           | 3.67        | 3.89        | 227                 |
| H1R        | 474.78      | 351.41   | 687.97   | 2.93           | 2.80        | 3.07        | 150                 |
| H2R        | 356.11      | 271.94   | 504.11   | 2.79           | 2.66        | 2.93        | 286                 |
| H4R        | 422.67      | 330.23   | 578.74   | 3.59           | 3.48        | 3.70        | 196                 |

**Table S3: OTU based analysis**

A/ Details of bacterial OTUs and associated statistics

| OTUId        | phylum         | class               | order       | family         | genus    | H1R | E3BS | E4R | E4BS | H1BS | H2R | H2BS | H4R | H4BS | E2R | E2BS | E3R | sum | %    |
|--------------|----------------|---------------------|-------------|----------------|----------|-----|------|-----|------|------|-----|------|-----|------|-----|------|-----|-----|------|
| Cluster6847; | Acidobact      | Acidobacteria       | Gp2         | Gp2            |          | 25  | 66   | 2   | 10   | 35   | 29  | 36   | 39  | 30   | 7   | 19   | 72  | 370 | 1.07 |
| Cluster18103 | Acidobact      | Acidobacteria       | Gp2         | Gp2            |          | 36  | 11   | 23  | 34   | 37   | 26  | 21   | 26  | 51   | 21  | 12   | 13  | 311 | 0.90 |
| Cluster17992 | Acidobact      | Acidobacteria       | Gp2         | Gp2            |          | 15  | 13   | 34  | 32   | 18   | 33  | 37   | 25  | 21   | 6   | 16   | 12  | 262 | 0.76 |
| Cluster14562 | Acidobact      | Acidobacteria       | Gp2         | Gp2            |          | 24  | 15   | 18  | 26   | 16   | 21  | 23   | 27  | 33   | 7   | 25   | 23  | 258 | 0.75 |
| Cluster2850; | Acidobact      | Acidobacteria       | Gp1         | Granulicella   |          | 19  | 29   | 17  | 21   | 21   | 9   | 15   | 17  | 12   | 30  | 16   | 7   | 213 | 0.62 |
| Cluster4524; | Acidobact      | Acidobacteria       | Gp2         | Gp2            |          | 10  | 68   | 2   | 4    | 15   | 4   | 2    | 13  | 14   | 0   | 10   | 62  | 204 | 0.59 |
| Cluster11489 | Proteobacteria |                     |             |                |          | 9   | 50   | 10  | 4    | 7    | 17  | 5    | 10  | 14   | 22  | 19   | 26  | 193 | 0.56 |
| Cluster21203 | Acidobact      | Acidobacteria       | Gp1         | Edaphobacter   |          | 16  | 10   | 13  | 13   | 17   | 13  | 14   | 15  | 15   | 19  | 20   | 23  | 188 | 0.55 |
| Cluster18940 | Acidobact      | Acidobacteria       | Gp2         | Gp2            |          | 17  | 18   | 28  | 25   | 6    | 17  | 17   | 18  | 7    | 3   | 8    | 4   | 168 | 0.49 |
| Cluster12709 | Acidobact      | Acidobacteria       | Gp1         |                |          | 21  | 22   | 4   | 1    | 6    | 13  | 10   | 26  | 19   | 1   | 7    | 23  | 153 | 0.44 |
| Cluster4743; | Acidobact      | Acidobacteria       | Gp1         | Edaphobacter   |          | 7   | 6    | 14  | 5    | 16   | 14  | 13   | 11  | 9    | 15  | 17   | 5   | 132 | 0.38 |
| Cluster23035 | Proteobac      | Gamm Xantl          | Sinobac     | Steroidobacter |          | 2   | 2    | 21  | 4    | 6    | 19  | 11   | 7   | 2    | 29  | 13   | 6   | 122 | 0.35 |
| Cluster7691; | size=778       |                     |             |                |          | 2   | 11   | 1   | 3    | 10   | 10  | 11   | 21  | 33   | 4   | 6    | 7   | 119 | 0.35 |
| Cluster3506; | size=796       |                     |             |                |          | 12  | 21   | 5   | 8    | 5    | 3   | 14   | 15  | 13   | 3   | 6    | 13  | 118 | 0.34 |
| Cluster16237 | Acidobact      | Acidobacteria       | Gp2         | Gp2            |          | 6   | 6    | 11  | 11   | 9    | 13  | 19   | 9   | 16   | 2   | 10   | 5   | 117 | 0.34 |
| Cluster2589; | Acidobact      | Acidobacteria       | Gp2         | Gp2            |          | 5   | 4    | 25  | 24   | 3    | 10  | 11   | 7   | 11   | 2   | 8    | 5   | 115 | 0.33 |
| Cluster4397; | size=806       |                     |             |                |          | 2   | 8    | 8   | 11   | 5    | 21  | 19   | 14  | 11   | 2   | 8    | 6   | 115 | 0.33 |
| Cluster14571 | Acidobact      | Acidobacteria       | Gp1         |                |          | 10  | 15   | 1   | 4    | 7    | 10  | 11   | 18  | 2    | 9   | 13   | 11  | 111 | 0.32 |
| Cluster7758; | Proteobac      | Alphaproteobacteria |             |                |          | 2   | 18   | 1   | 8    | 3    | 9   | 11   | 10  | 32   | 1   | 1    | 10  | 106 | 0.31 |
| Cluster119;  | si Acidobact   | Acidobacteria       | Gp2         | Gp2            |          | 5   | 25   | 6   | 5    | 6    | 7   | 10   | 6   | 11   | 0   | 2    | 16  | 99  | 0.29 |
| Cluster23427 | Proteobac      | Gamm Xantl          | Sinobac     | Steroidobacter |          | 0   | 0    | 0   | 2    | 15   | 7   | 7    | 13  | 8    | 43  | 0    | 0   | 95  | 0.28 |
| Cluster6540; | Acidobact      | Acidobacteria       | Gp2         | Gp2            |          | 4   | 10   | 1   | 11   | 6    | 6   | 9    | 14  | 12   | 0   | 4    | 16  | 93  | 0.27 |
| Cluster179;  | si Proteobac   | Alphap              | Rhizobiales |                |          | 9   | 2    | 10  | 7    | 11   | 10  | 4    | 5   | 12   | 9   | 6    | 5   | 90  | 0.26 |
| Cluster8857; | Verrucom       | Opitut;             | Opitu       | Opituta        | Opitutus | 10  | 6    | 4   | 1    | 0    | 13  | 1    | 2   | 7    | 33  | 6    | 6   | 89  | 0.26 |

|                                                              |    |    |    |    |    |    |    |    |    |    |    |    |    |      |
|--------------------------------------------------------------|----|----|----|----|----|----|----|----|----|----|----|----|----|------|
| Cluster14049; Acidobact Acidobacteria_Gp1                    | 9  | 7  | 11 | 2  | 7  | 9  | 8  | 3  | 7  | 14 | 4  | 8  | 89 | 0.26 |
| Cluster19548; Proteobac Gamm Xantl Sinobac Steroidobacter    | 1  | 6  | 5  | 12 | 10 | 9  | 3  | 3  | 3  | 17 | 11 | 7  | 87 | 0.25 |
| Cluster8;size: Proteobac Alpha; Rhodospirillales             | 7  | 1  | 10 | 7  | 6  | 6  | 17 | 3  | 4  | 12 | 13 | 0  | 86 | 0.25 |
| Cluster3306; Proteobac Gammaproteobacteria                   | 13 | 1  | 11 | 8  | 11 | 12 | 11 | 4  | 2  | 6  | 5  | 2  | 86 | 0.25 |
| Cluster1045; Actinobac Actinol Acidi Acidimii Aciditerrimona | 4  | 10 | 9  | 4  | 6  | 6  | 7  | 7  | 6  | 13 | 8  | 4  | 84 | 0.24 |
| Cluster3862; Proteobac Gammaproteobacteria                   | 20 | 11 | 3  | 3  | 7  | 4  | 4  | 4  | 11 | 0  | 2  | 14 | 83 | 0.24 |
| Cluster16175; Acidobact Acidobacteria_Gp1 Gp1                | 1  | 1  | 11 | 15 | 9  | 6  | 2  | 0  | 5  | 21 | 12 | 0  | 83 | 0.24 |
| Cluster5604; Acidobacteria                                   | 4  | 9  | 1  | 4  | 9  | 2  | 9  | 8  | 15 | 2  | 11 | 8  | 82 | 0.24 |
| Cluster16075; Acidobact Acidobacteria_Gp1                    | 0  | 1  | 2  | 6  | 19 | 10 | 0  | 4  | 21 | 5  | 14 | 0  | 82 | 0.24 |
| Cluster19322; Acidobact Acidobacteria_Gp2 Gp2                | 9  | 19 | 5  | 9  | 8  | 12 | 12 | 1  | 3  | 0  | 0  | 1  | 79 | 0.23 |
| Cluster2845; Actinobac Actinol Actinomycetales               | 6  | 4  | 2  | 1  | 10 | 4  | 9  | 10 | 9  | 6  | 10 | 7  | 78 | 0.23 |
| Cluster7100; Proteobac Alpha; Rhizc Xantho Pseudolabrys      | 7  | 2  | 5  | 13 | 9  | 7  | 7  | 6  | 5  | 2  | 11 | 1  | 75 | 0.22 |
| Cluster1707; Actinobac Actinol Actinomycetales               | 6  | 2  | 4  | 0  | 8  | 10 | 3  | 13 | 10 | 7  | 5  | 6  | 74 | 0.21 |
| Cluster15933; Acidobact Acidobacteria_Gp2 Gp2                | 6  | 6  | 5  | 3  | 15 | 11 | 6  | 4  | 8  | 1  | 2  | 5  | 72 | 0.21 |
| Cluster27;size: Verrucom Opitut; Opitu Opituta Opitutus      | 18 | 0  | 2  | 0  | 6  | 24 | 6  | 3  | 2  | 10 | 0  | 0  | 71 | 0.21 |
| Cluster2830; Proteobac Deltaproteobacteria                   | 5  | 8  | 5  | 4  | 10 | 3  | 0  | 1  | 13 | 5  | 9  | 7  | 70 | 0.20 |
| Cluster14115; Acidobact Acidobacteria_Gp1                    | 4  | 9  | 0  | 1  | 3  | 8  | 2  | 14 | 16 | 3  | 3  | 7  | 70 | 0.20 |
| Cluster200;size: Acidobact Acidobacteria_Gp3 Gp3             | 3  | 1  | 9  | 5  | 2  | 4  | 2  | 2  | 4  | 26 | 9  | 2  | 69 | 0.20 |
| Cluster3529; Acidobact Acidobacteria_Gp2 Gp2                 | 4  | 14 | 3  | 3  | 1  | 9  | 10 | 0  | 1  | 1  | 6  | 17 | 69 | 0.20 |
| Cluster5329; Proteobac Gamm Xantl Sinobac Steroidobacter     | 7  | 3  | 11 | 7  | 2  | 1  | 2  | 1  | 4  | 9  | 16 | 5  | 68 | 0.20 |
| Cluster171;size: Proteobac Betapr Burkholderiales            | 7  | 1  | 1  | 1  | 1  | 11 | 1  | 30 | 9  | 2  | 0  | 3  | 67 | 0.19 |
| Cluster3010; Proteobac Alpha; Rhodospirillales               | 6  | 1  | 4  | 4  | 11 | 3  | 7  | 1  | 4  | 6  | 19 | 1  | 67 | 0.19 |
| Cluster10446; Proteobac Betaproteobacteria                   | 3  | 4  | 4  | 11 | 1  | 11 | 7  | 5  | 6  | 1  | 8  | 6  | 67 | 0.19 |
| Cluster26697; Actinobac Actinol Actinomycetales              | 3  | 2  | 0  | 5  | 9  | 10 | 11 | 6  | 6  | 8  | 4  | 3  | 67 | 0.19 |
| Cluster11223; Proteobac Alpha; Rhizobiales                   | 5  | 10 | 8  | 2  | 7  | 3  | 1  | 1  | 12 | 7  | 3  | 6  | 65 | 0.19 |
| Cluster12566; Acidobact Acidobacteria_Gp2 Gp2                | 9  | 6  | 4  | 3  | 4  | 2  | 3  | 8  | 6  | 1  | 10 | 8  | 64 | 0.19 |
| Cluster3358; Acidobact Acidobacteria_Gp2 Gp2                 | 3  | 5  | 3  | 1  | 3  | 4  | 4  | 6  | 19 | 4  | 6  | 5  | 63 | 0.18 |
| Cluster7861; Acidobact Acidobacteria_Gp2 Gp2                 | 1  | 7  | 4  | 7  | 3  | 2  | 5  | 2  | 7  | 8  | 3  | 14 | 63 | 0.18 |
| Cluster19858; Acidobact Acidobacteria_Gp2 Gp2                | 10 | 8  | 7  | 5  | 19 | 7  | 5  | 0  | 0  | 0  | 2  | 0  | 63 | 0.18 |

|                                                           |    |    |    |    |    |    |    |    |    |    |    |    |    |      |
|-----------------------------------------------------------|----|----|----|----|----|----|----|----|----|----|----|----|----|------|
| Cluster57;size: Acidobact Acidobacteria_Gp1 Gp1           | 11 | 2  | 7  | 2  | 7  | 6  | 2  | 2  | 2  | 18 | 0  | 3  | 62 | 0.18 |
| Cluster7883; Proteobac Gamm Xantl Sinobac Steroidobacter  | 14 | 2  | 5  | 4  | 8  | 5  | 2  | 5  | 2  | 5  | 7  | 3  | 62 | 0.18 |
| Cluster15109; Acidobact Acidobacteria_Gp2 Gp2             | 4  | 10 | 3  | 4  | 7  | 6  | 1  | 6  | 10 | 4  | 2  | 5  | 62 | 0.18 |
| Cluster727;si Proteobac Gammaproteobacteria               | 11 | 7  | 3  | 9  | 6  | 3  | 3  | 5  | 6  | 0  | 6  | 2  | 61 | 0.18 |
| Cluster2797; Acidobact Acidobacteria_Gp3                  | 8  | 2  | 3  | 3  | 5  | 3  | 2  | 1  | 3  | 15 | 7  | 9  | 61 | 0.18 |
| Cluster5715; Acidobact Acidobacteria_Gp2 Gp2              | 0  | 3  | 7  | 19 | 1  | 2  | 1  | 8  | 10 | 2  | 5  | 3  | 61 | 0.18 |
| Cluster7356; Proteobac Alphap Rhodospirillales            | 3  | 4  | 10 | 13 | 3  | 5  | 2  | 9  | 8  | 1  | 1  | 2  | 61 | 0.18 |
| Cluster10871 Proteobac Alphap Rhizc Bradyrhizobiaceae     | 5  | 10 | 5  | 3  | 2  | 9  | 5  | 3  | 4  | 4  | 1  | 10 | 61 | 0.18 |
| Cluster9;size: Proteobac Alphap Rhodospirillales          | 3  | 6  | 3  | 2  | 0  | 10 | 10 | 8  | 10 | 0  | 2  | 6  | 60 | 0.17 |
| Cluster4538; Proteobac Alphap Rhizobiales                 | 3  | 2  | 0  | 10 | 4  | 6  | 10 | 9  | 7  | 1  | 5  | 2  | 59 | 0.17 |
| Cluster772;si Acidobact Acidobacteria_Gp1                 | 6  | 6  | 2  | 4  | 8  | 8  | 3  | 6  | 7  | 3  | 1  | 4  | 58 | 0.17 |
| Cluster4050; Acidobact Acidobacteria_Gp2 Gp2              | 3  | 4  | 4  | 10 | 1  | 6  | 6  | 4  | 8  | 1  | 6  | 5  | 58 | 0.17 |
| Cluster14550 Acidobact Acidobacteria_Gp1                  | 7  | 0  | 4  | 8  | 12 | 3  | 7  | 3  | 0  | 8  | 6  | 0  | 58 | 0.17 |
| Cluster17748 Proteobac Gamm Xantl Sinobac Steroidobacter  | 9  | 9  | 1  | 12 | 0  | 1  | 1  | 2  | 0  | 4  | 8  | 11 | 58 | 0.17 |
| Cluster1759; Verrucom Opitut: Opitu Opituta Opitutus      | 3  | 2  | 7  | 0  | 1  | 5  | 1  | 2  | 4  | 22 | 5  | 5  | 57 | 0.17 |
| Cluster16659;size=285                                     | 1  | 0  | 5  | 5  | 11 | 13 | 0  | 0  | 15 | 1  | 6  | 0  | 57 | 0.17 |
| Cluster356;si Proteobac Betapr Burkl Burkhol Burkholderia | 17 | 2  | 8  | 3  | 10 | 2  | 2  | 4  | 4  | 2  | 0  | 2  | 56 | 0.16 |
| Cluster2439; Proteobac Gamm Xantl Sinobac Steroidobacter  | 0  | 10 | 6  | 2  | 1  | 8  | 2  | 5  | 7  | 4  | 4  | 7  | 56 | 0.16 |
| Cluster3009; Acidobact Acidobacteria_Gp3 Gp3              | 2  | 15 | 1  | 2  | 2  | 4  | 4  | 8  | 9  | 3  | 2  | 4  | 56 | 0.16 |
| Cluster3226; Proteobac Alphap Caulc Caulobacteraceae      | 12 | 1  | 2  | 2  | 11 | 1  | 4  | 2  | 0  | 9  | 10 | 2  | 56 | 0.16 |
| Cluster5271; Acidobact Acidobacteria_Gp2 Gp2              | 3  | 4  | 3  | 2  | 3  | 6  | 2  | 10 | 8  | 3  | 8  | 4  | 56 | 0.16 |
| Cluster14783 Proteobac Betapr Burkl Burkhol Burkholderia  | 3  | 3  | 7  | 6  | 4  | 4  | 3  | 8  | 9  | 1  | 2  | 6  | 56 | 0.16 |
| Cluster2230; Verrucom Opitut: Opitu Opituta Opitutus      | 6  | 3  | 0  | 1  | 2  | 7  | 1  | 0  | 2  | 30 | 0  | 3  | 55 | 0.16 |
| Cluster6361; Acidobact Acidobacteria_Gp2 Gp2              | 2  | 12 | 0  | 2  | 7  | 2  | 2  | 9  | 11 | 0  | 4  | 4  | 55 | 0.16 |
| Cluster14148;size=314                                     | 3  | 5  | 2  | 3  | 6  | 5  | 10 | 9  | 3  | 0  | 5  | 4  | 55 | 0.16 |
| Cluster23;size=331                                        | 2  | 6  | 5  | 8  | 1  | 4  | 3  | 5  | 6  | 5  | 5  | 4  | 54 | 0.16 |
| Cluster2553; Acidobact Acidobacteria_Gp2 Gp2              | 0  | 13 | 0  | 4  | 0  | 3  | 2  | 12 | 9  | 0  | 2  | 9  | 54 | 0.16 |
| Cluster4922; Verrucom Opitut: Opitu Opituta Opitutus      | 1  | 23 | 0  | 0  | 0  | 0  | 1  | 0  | 0  | 2  | 1  | 26 | 54 | 0.16 |
| Cluster1654; Actinobac Actinol Actinomycetales            | 4  | 7  | 1  | 3  | 4  | 3  | 9  | 2  | 4  | 9  | 4  | 3  | 53 | 0.15 |

|                                                          |    |    |    |    |    |    |   |    |    |    |    |    |    |      |
|----------------------------------------------------------|----|----|----|----|----|----|---|----|----|----|----|----|----|------|
| Cluster1900; Proteobac Gammaproteobacteria               | 16 | 1  | 2  | 3  | 14 | 8  | 4 | 2  | 2  | 0  | 0  | 1  | 53 | 0.15 |
| Cluster2857; Acidobact Acidobacteria_Gp1 Gp1             | 8  | 3  | 6  | 5  | 9  | 4  | 2 | 1  | 0  | 8  | 4  | 3  | 53 | 0.15 |
| Cluster7790; Acidobact Acidobacteria_Gp1                 | 2  | 8  | 9  | 6  | 0  | 5  | 7 | 2  | 5  | 4  | 2  | 3  | 53 | 0.15 |
| Cluster23167 Proteobac Gammaproteobacteria               | 0  | 0  | 0  | 0  | 16 | 9  | 6 | 10 | 11 | 0  | 0  | 1  | 53 | 0.15 |
| Cluster6175; Acidobact Acidobacteria_Gp2 Gp2             | 0  | 19 | 0  | 3  | 6  | 0  | 1 | 3  | 1  | 0  | 0  | 19 | 52 | 0.15 |
| Cluster2340; Acidobact Acidobacteria_Gp1                 | 3  | 9  | 1  | 0  | 3  | 3  | 5 | 9  | 8  | 1  | 2  | 7  | 51 | 0.15 |
| Cluster5050; Acidobacteria                               | 1  | 8  | 2  | 0  | 4  | 5  | 3 | 8  | 6  | 0  | 9  | 5  | 51 | 0.15 |
| Cluster12173 Verrucom Opitut; Opitu Opituta Opitutus     | 21 | 0  | 0  | 1  | 6  | 16 | 3 | 2  | 2  | 0  | 0  | 0  | 51 | 0.15 |
| Cluster19869 Acidobact Acidobacteria_Gp2 Gp2             | 3  | 0  | 17 | 27 | 0  | 2  | 1 | 0  | 0  | 0  | 1  | 0  | 51 | 0.15 |
| Cluster3098; Actinobac Actinol Actinomycetales           | 3  | 1  | 0  | 3  | 3  | 5  | 8 | 13 | 6  | 2  | 6  | 0  | 50 | 0.15 |
| Cluster7920; Acidobact Acidobacteria_Gp3                 | 5  | 1  | 3  | 3  | 4  | 6  | 2 | 6  | 2  | 12 | 4  | 2  | 50 | 0.15 |
| Cluster18579 Acidobact Acidobacteria_Gp2 Gp2             | 0  | 0  | 0  | 1  | 0  | 0  | 5 | 5  | 17 | 20 | 1  | 1  | 50 | 0.15 |
| Cluster21922 Acidobact Acidobacteria_Gp1 Edaphobacter    | 4  | 1  | 5  | 5  | 4  | 2  | 5 | 4  | 3  | 9  | 5  | 3  | 50 | 0.15 |
| Cluster1257; Acidobact Acidobacteria_Gp1                 | 3  | 12 | 1  | 2  | 1  | 6  | 6 | 4  | 7  | 0  | 2  | 5  | 49 | 0.14 |
| Cluster2571; Proteobac Alpha Rhizc Xanthol Labrys        | 1  | 12 | 0  | 1  | 1  | 2  | 1 | 6  | 9  | 5  | 7  | 4  | 49 | 0.14 |
| Cluster8030; Proteobac Gamm Xantl Sinobac Steroidobacter | 2  | 4  | 3  | 5  | 6  | 3  | 3 | 3  | 1  | 11 | 5  | 3  | 49 | 0.14 |
| Cluster1062; Acidobact Acidobacteria_Gp2 Gp2             | 3  | 6  | 1  | 1  | 7  | 3  | 4 | 6  | 7  | 0  | 6  | 4  | 48 | 0.14 |
| Cluster1725; Proteobac Gamm Xantl Sinobac Steroidobacter | 3  | 1  | 4  | 2  | 5  | 1  | 1 | 0  | 2  | 18 | 9  | 2  | 48 | 0.14 |
| Cluster1800; size=265                                    | 6  | 4  | 7  | 5  | 4  | 3  | 1 | 1  | 1  | 5  | 6  | 5  | 48 | 0.14 |
| Cluster3179; Proteobac Alpha Rhizobiales                 | 1  | 2  | 9  | 5  | 3  | 3  | 1 | 3  | 8  | 8  | 3  | 2  | 48 | 0.14 |
| Cluster3604; Proteobac Gamm Xantl Sinobac Steroidobacter | 1  | 1  | 9  | 6  | 4  | 2  | 2 | 1  | 1  | 12 | 4  | 5  | 48 | 0.14 |
| Cluster4497; Acidobact Acidobacteria_Gp10 Gp10           | 2  | 8  | 4  | 8  | 1  | 1  | 2 | 6  | 4  | 0  | 3  | 9  | 48 | 0.14 |
| Cluster11252 Acidobact Acidobacteria_Gp1                 | 1  | 2  | 16 | 8  | 1  | 0  | 0 | 1  | 1  | 12 | 5  | 1  | 48 | 0.14 |
| Cluster16681 Proteobac Gamm Xantl Sinobac Steroidobacter | 8  | 7  | 8  | 6  | 0  | 1  | 0 | 0  | 0  | 1  | 11 | 6  | 48 | 0.14 |
| Cluster2315; Acidobact Acidobacteria_Gp3 Gp3             | 1  | 6  | 0  | 1  | 3  | 1  | 2 | 3  | 14 | 2  | 1  | 13 | 47 | 0.14 |
| Cluster3983; Proteobac Betapr Burkl Burkhol Burkholderia | 4  | 2  | 8  | 4  | 4  | 8  | 5 | 6  | 5  | 1  | 0  | 0  | 47 | 0.14 |
| Cluster190;si Verrucom Subdivision3 Subdivision3_ξ       | 7  | 4  | 0  | 2  | 5  | 9  | 6 | 3  | 0  | 2  | 5  | 3  | 46 | 0.13 |
| Cluster1224; Proteobac Alpha Rhizobiales                 | 3  | 0  | 3  | 3  | 10 | 2  | 1 | 4  | 5  | 5  | 9  | 1  | 46 | 0.13 |
| Cluster2435; Proteobac Alpha Rhizobiales                 | 1  | 9  | 2  | 1  | 4  | 3  | 8 | 8  | 6  | 2  | 1  | 1  | 46 | 0.13 |



|                                                           |    |    |   |    |   |    |   |   |    |    |   |    |    |      |
|-----------------------------------------------------------|----|----|---|----|---|----|---|---|----|----|---|----|----|------|
| Cluster3793; Proteobac Alpha; Alphaproteob; Rhizomicrobiu | 3  | 2  | 5 | 1  | 6 | 6  | 4 | 2 | 1  | 5  | 7 | 4  | 46 | 0.13 |
| Cluster353;si Verrucom Opitut; Opitu Opituta Opitutus     | 0  | 3  | 3 | 1  | 0 | 4  | 0 | 1 | 2  | 13 | 1 | 17 | 45 | 0.13 |
| Cluster10767 Acidobacteria                                | 3  | 5  | 0 | 1  | 9 | 2  | 1 | 8 | 6  | 0  | 2 | 8  | 45 | 0.13 |
| Cluster1178; Acidobact Acidobacteria_Gp1 Gp1              | 4  | 4  | 3 | 2  | 6 | 1  | 3 | 6 | 2  | 9  | 4 | 0  | 44 | 0.13 |
| Cluster13751 Acidobact Acidobacteria_Gp10 Gp10            | 4  | 8  | 3 | 4  | 4 | 1  | 1 | 6 | 2  | 0  | 2 | 9  | 44 | 0.13 |
| Cluster14445 Proteobac Gamm Xantl Sinobac Steroidobacter  | 4  | 17 | 1 | 3  | 1 | 1  | 0 | 1 | 1  | 1  | 1 | 13 | 44 | 0.13 |
| Cluster371;si Gemmatir Gemm Geml Gemma Gemmatimonæ        | 1  | 2  | 1 | 2  | 3 | 7  | 6 | 4 | 4  | 10 | 3 | 0  | 43 | 0.12 |
| Cluster7671; Proteobac Gammaproteobacteria                | 6  | 4  | 2 | 4  | 1 | 7  | 4 | 4 | 4  | 3  | 3 | 1  | 43 | 0.12 |
| Cluster9864; Acidobact Acidobacteria_Gp2 Gp2              | 1  | 6  | 8 | 7  | 2 | 0  | 0 | 2 | 3  | 3  | 4 | 7  | 43 | 0.12 |
| Cluster15102;size=271                                     | 9  | 6  | 4 | 2  | 3 | 1  | 3 | 5 | 2  | 0  | 3 | 5  | 43 | 0.12 |
| Cluster17377 Acidobacteria                                | 0  | 2  | 5 | 2  | 0 | 7  | 0 | 0 | 15 | 6  | 5 | 1  | 43 | 0.12 |
| Cluster18205 Acidobact Acidobacteria_Gp2 Gp2              | 2  | 2  | 4 | 0  | 4 | 4  | 5 | 5 | 1  | 5  | 6 | 5  | 43 | 0.12 |
| Cluster18793 Acidobact Acidobacteria_Gp1 Gp1              | 2  | 7  | 3 | 0  | 2 | 4  | 4 | 4 | 7  | 3  | 2 | 5  | 43 | 0.12 |
| Cluster485;si Proteobac Alpha; Rhizc Xanthol Labrys       | 11 | 0  | 4 | 2  | 1 | 7  | 0 | 3 | 4  | 0  | 3 | 7  | 42 | 0.12 |
| Cluster5780; Verrucom Opitut; Opitu Opituta Opitutus      | 6  | 2  | 1 | 0  | 4 | 6  | 0 | 0 | 0  | 17 | 0 | 6  | 42 | 0.12 |
| Cluster1608; Proteobac Deltaproteobacteria                | 1  | 1  | 2 | 6  | 0 | 5  | 5 | 5 | 6  | 1  | 7 | 2  | 41 | 0.12 |
| Cluster1736; Proteobac Gammaproteobacteria                | 1  | 1  | 5 | 5  | 3 | 6  | 2 | 3 | 0  | 9  | 4 | 2  | 41 | 0.12 |
| Cluster1970; Proteobac Alpha; Rhizobiales                 | 3  | 7  | 6 | 0  | 1 | 2  | 4 | 1 | 4  | 2  | 5 | 6  | 41 | 0.12 |
| Cluster14310 Acidobact Acidobacteria_Gp1                  | 1  | 9  | 4 | 2  | 2 | 5  | 2 | 4 | 4  | 4  | 0 | 4  | 41 | 0.12 |
| Cluster18117 Proteobac Betapr Burkl Burkhol Burkholderia  | 4  | 4  | 6 | 7  | 4 | 1  | 4 | 0 | 0  | 3  | 3 | 5  | 41 | 0.12 |
| Cluster2233; Proteobacteria                               | 3  | 13 | 1 | 1  | 1 | 4  | 5 | 4 | 3  | 0  | 0 | 5  | 40 | 0.12 |
| Cluster2235; Proteobac Alpha; Caulc Caulobæ Caulobacter   | 1  | 2  | 3 | 3  | 3 | 5  | 2 | 1 | 2  | 5  | 9 | 4  | 40 | 0.12 |
| Cluster3766; Acidobact Acidobacteria_Gp2 Gp2              | 1  | 6  | 3 | 0  | 0 | 11 | 6 | 0 | 0  | 0  | 4 | 9  | 40 | 0.12 |
| Cluster25806 Actinobac Actinol Actinomycetales            | 0  | 4  | 1 | 1  | 1 | 10 | 5 | 5 | 4  | 2  | 4 | 3  | 40 | 0.12 |
| Cluster1253; Acidobact Acidobacteria_Gp2 Gp2              | 7  | 1  | 5 | 2  | 5 | 3  | 0 | 4 | 4  | 2  | 4 | 2  | 39 | 0.11 |
| Cluster3610; Acidobact Acidobacteria_Gp2 Gp2              | 1  | 4  | 1 | 1  | 5 | 2  | 4 | 4 | 0  | 0  | 2 | 15 | 39 | 0.11 |
| Cluster4408; Acidobact Acidobacteria_Gp1                  | 1  | 1  | 8 | 10 | 2 | 0  | 1 | 7 | 8  | 1  | 0 | 0  | 39 | 0.11 |
| Cluster12555 Acidobact Acidobacteria_Gp2 Gp2              | 1  | 8  | 0 | 0  | 4 | 1  | 1 | 3 | 3  | 0  | 1 | 17 | 39 | 0.11 |
| Cluster24741 Proteobac Alpha; Caulc Caulobacteraceae      | 3  | 1  | 3 | 5  | 6 | 2  | 1 | 2 | 5  | 8  | 3 | 0  | 39 | 0.11 |

|                                                             |   |    |   |    |   |   |   |    |    |    |   |    |    |      |
|-------------------------------------------------------------|---|----|---|----|---|---|---|----|----|----|---|----|----|------|
| Cluster512;si Proteobac Alphap Rhod Acetobacteraceae        | 5 | 5  | 3 | 6  | 2 | 1 | 1 | 0  | 1  | 5  | 5 | 4  | 38 | 0.11 |
| Cluster1431; Acidobact Acidobacteria_Gp1                    | 7 | 0  | 4 | 3  | 2 | 3 | 0 | 5  | 0  | 13 | 1 | 0  | 38 | 0.11 |
| Cluster6725; Acidobact Acidobacteria_Gp3                    | 2 | 6  | 1 | 4  | 3 | 1 | 3 | 3  | 3  | 5  | 6 | 1  | 38 | 0.11 |
| Cluster9399; Acidobact Acidobacteria_Gp1 Gp1                | 2 | 7  | 1 | 1  | 1 | 7 | 4 | 2  | 5  | 1  | 0 | 7  | 38 | 0.11 |
| Cluster11510 Proteobac Alphap Rhizc Xanthol Pseudolabrys    | 5 | 6  | 2 | 0  | 3 | 1 | 1 | 2  | 3  | 7  | 4 | 4  | 38 | 0.11 |
| Cluster13130 Bacteroid Sphing Sphir Chitinophagaceae        | 2 | 2  | 0 | 4  | 6 | 3 | 7 | 2  | 4  | 1  | 4 | 3  | 38 | 0.11 |
| Cluster1795; Proteobac Gammaproteobacteria                  | 6 | 6  | 0 | 0  | 1 | 9 | 0 | 1  | 2  | 1  | 3 | 8  | 37 | 0.11 |
| Cluster2326;size=202                                        | 2 | 6  | 4 | 10 | 0 | 2 | 1 | 4  | 1  | 0  | 4 | 3  | 37 | 0.11 |
| Cluster2835; Proteobac Alphap Rhod Acetob; Acidisphaera     | 4 | 0  | 6 | 4  | 2 | 3 | 3 | 0  | 2  | 7  | 6 | 0  | 37 | 0.11 |
| Cluster3222;size=176                                        | 2 | 3  | 3 | 2  | 5 | 1 | 1 | 2  | 5  | 6  | 4 | 3  | 37 | 0.11 |
| Cluster3542; Proteobac Gammaproteobacteria                  | 5 | 0  | 2 | 4  | 5 | 2 | 1 | 4  | 3  | 4  | 3 | 4  | 37 | 0.11 |
| Cluster4371; Acidobact Acidobacteria_Gp1                    | 3 | 1  | 3 | 1  | 2 | 3 | 1 | 7  | 7  | 1  | 3 | 5  | 37 | 0.11 |
| Cluster11246 Proteobac Alphap Rhizobiales                   | 3 | 5  | 0 | 0  | 2 | 4 | 1 | 4  | 9  | 0  | 4 | 5  | 37 | 0.11 |
| Cluster18996 Acidobact Acidobacteria_Gp2 Gp2                | 1 | 8  | 0 | 3  | 4 | 5 | 4 | 4  | 3  | 0  | 2 | 3  | 37 | 0.11 |
| Cluster64;size Proteobac Alphap Rhizc Beijerin Methylocapsa | 4 | 4  | 5 | 0  | 2 | 1 | 2 | 6  | 2  | 5  | 4 | 1  | 36 | 0.10 |
| Cluster1655; Acidobact Acidobacteria_Gp2 Gp2                | 9 | 8  | 1 | 1  | 4 | 3 | 2 | 1  | 1  | 1  | 3 | 2  | 36 | 0.10 |
| Cluster3855; Acidobact Acidobacteria_Gp1                    | 3 | 2  | 1 | 3  | 2 | 6 | 3 | 1  | 10 | 1  | 2 | 2  | 36 | 0.10 |
| Cluster4077; Proteobac Alphap Rhodospirillales              | 0 | 8  | 4 | 4  | 1 | 6 | 2 | 1  | 4  | 1  | 2 | 3  | 36 | 0.10 |
| Cluster7282; Proteobac Alphap Rhizc Bradyrh Bradyrhizobiur  | 0 | 1  | 0 | 0  | 3 | 5 | 4 | 10 | 8  | 1  | 4 | 0  | 36 | 0.10 |
| Cluster13828 Acidobact Acidobacteria_Gp1 Gp1                | 4 | 2  | 5 | 4  | 2 | 0 | 1 | 2  | 2  | 10 | 3 | 1  | 36 | 0.10 |
| Cluster14736 Acidobact Acidobacteria_Gp2 Gp2                | 0 | 3  | 0 | 0  | 1 | 3 | 0 | 6  | 11 | 2  | 9 | 1  | 36 | 0.10 |
| Cluster906;si Proteobac Betapr Burkl Burkhol Burkholderia   | 2 | 3  | 6 | 3  | 4 | 5 | 1 | 4  | 5  | 0  | 0 | 2  | 35 | 0.10 |
| Cluster3785; Acidobact Acidobacteria_Gp2 Gp2                | 1 | 5  | 1 | 1  | 1 | 4 | 3 | 8  | 5  | 0  | 3 | 3  | 35 | 0.10 |
| Cluster5621; Acidobact Acidobacteria_Gp2 Gp2                | 4 | 3  | 0 | 1  | 1 | 5 | 5 | 3  | 4  | 1  | 6 | 2  | 35 | 0.10 |
| Cluster16787 Proteobac Gammaproteobacteria                  | 7 | 5  | 2 | 4  | 0 | 1 | 0 | 1  | 1  | 0  | 2 | 12 | 35 | 0.10 |
| Cluster22368 Actinobac Actinol Actin Mycoba Mycobacteriur   | 1 | 3  | 2 | 1  | 3 | 2 | 6 | 4  | 3  | 6  | 1 | 3  | 35 | 0.10 |
| Cluster7;size: Acidobact Acidobacteria_Gp2 Gp2              | 0 | 3  | 7 | 5  | 4 | 0 | 3 | 2  | 1  | 2  | 3 | 4  | 34 | 0.10 |
| Cluster1343; Proteobac Alphap Rhodospirillales              | 1 | 10 | 0 | 0  | 2 | 1 | 3 | 10 | 4  | 0  | 1 | 2  | 34 | 0.10 |
| Cluster2251; Acidobact Acidobacteria_Gp2 Gp2                | 6 | 2  | 4 | 4  | 2 | 1 | 2 | 2  | 5  | 0  | 3 | 3  | 34 | 0.10 |

|                                                          |    |   |   |   |   |    |    |   |   |    |    |   |    |      |
|----------------------------------------------------------|----|---|---|---|---|----|----|---|---|----|----|---|----|------|
| Cluster3297;size=58                                      | 23 | 0 | 0 | 0 | 5 | 0  | 0  | 3 | 2 | 1  | 0  | 0 | 34 | 0.10 |
| Cluster4648; Acidobact Acidobacteria_Gp1 Gp1             | 3  | 5 | 0 | 0 | 0 | 4  | 0  | 7 | 9 | 0  | 0  | 6 | 34 | 0.10 |
| Cluster4968; Proteobac Alphap Rhizc Xantho Pseudolabrys  | 1  | 6 | 1 | 2 | 4 | 1  | 2  | 4 | 4 | 0  | 6  | 3 | 34 | 0.10 |
| Cluster273;si Acidobacteria                              | 3  | 4 | 3 | 3 | 1 | 4  | 3  | 2 | 3 | 2  | 1  | 4 | 33 | 0.10 |
| Cluster717;si Acidobact Acidobacteria_Gp3 Gp3            | 0  | 2 | 3 | 1 | 2 | 1  | 2  | 2 | 1 | 12 | 7  | 0 | 33 | 0.10 |
| Cluster1697;size=179                                     | 6  | 2 | 1 | 3 | 2 | 1  | 2  | 2 | 5 | 5  | 3  | 1 | 33 | 0.10 |
| Cluster2076; Proteobac Alphap Alphaproteok Rhizomicrobiu | 3  | 2 | 1 | 3 | 4 | 4  | 4  | 5 | 3 | 2  | 0  | 2 | 33 | 0.10 |
| Cluster3341; Proteobac Alphap Rhizc Xantho Pseudolabrys  | 3  | 0 | 4 | 4 | 1 | 2  | 5  | 1 | 5 | 1  | 6  | 1 | 33 | 0.10 |
| Cluster3889; Proteobac Alphap Rhodospirillales           | 1  | 5 | 1 | 3 | 0 | 8  | 1  | 6 | 6 | 0  | 1  | 1 | 33 | 0.10 |
| Cluster43;si Proteobac Alphap Rhizobiales                | 2  | 5 | 1 | 2 | 2 | 5  | 8  | 0 | 1 | 3  | 2  | 1 | 32 | 0.09 |
| Cluster192;si Acidobact Acidobacteria_Gp10 Gp10          | 4  | 8 | 1 | 4 | 1 | 0  | 0  | 4 | 4 | 0  | 3  | 3 | 32 | 0.09 |
| Cluster4374; Acidobact Acidobacteria_Gp1                 | 0  | 2 | 0 | 5 | 1 | 5  | 2  | 6 | 8 | 0  | 3  | 0 | 32 | 0.09 |
| Cluster5708;size=243                                     | 3  | 5 | 3 | 3 | 1 | 2  | 7  | 2 | 2 | 0  | 2  | 2 | 32 | 0.09 |
| Cluster14180 Acidobact Acidobacteria_Gp1 Gp1             | 4  | 2 | 0 | 0 | 3 | 2  | 10 | 3 | 2 | 1  | 2  | 3 | 32 | 0.09 |
| Cluster68;si Proteobac Betaproteobacteria                | 2  | 5 | 0 | 4 | 3 | 4  | 5  | 1 | 3 | 0  | 2  | 2 | 31 | 0.09 |
| Cluster292;si Proteobac Alphap Rhod Rhodospirillaceae    | 6  | 5 | 3 | 2 | 2 | 2  | 3  | 0 | 0 | 1  | 3  | 4 | 31 | 0.09 |
| Cluster674;si Actinobac Actino Actinomycetales           | 1  | 2 | 1 | 2 | 2 | 6  | 3  | 4 | 4 | 3  | 2  | 1 | 31 | 0.09 |
| Cluster723;si Proteobac Alphap Rhod Rhodospirillaceae    | 2  | 7 | 0 | 1 | 3 | 2  | 1  | 2 | 4 | 0  | 0  | 9 | 31 | 0.09 |
| Cluster1018; Verrucom Spartobacteria Spartobacteria      | 2  | 3 | 1 | 4 | 1 | 1  | 0  | 2 | 7 | 0  | 2  | 8 | 31 | 0.09 |
| Cluster4489; Proteobac Alphap Rhodospirillales           | 2  | 2 | 1 | 1 | 2 | 5  | 2  | 5 | 7 | 2  | 0  | 2 | 31 | 0.09 |
| Cluster14716 Acidobact Acidobacteria_Gp3                 | 2  | 7 | 1 | 4 | 2 | 1  | 4  | 4 | 1 | 1  | 3  | 1 | 31 | 0.09 |
| Cluster16702 Acidobact Acidobacteria_Gp1 Granulicella    | 0  | 0 | 5 | 4 | 2 | 5  | 0  | 0 | 5 | 7  | 3  | 0 | 31 | 0.09 |
| Cluster38;size=266                                       | 2  | 1 | 2 | 4 | 0 | 4  | 4  | 1 | 5 | 0  | 4  | 3 | 30 | 0.09 |
| Cluster741;si Proteobac Alphap Rhod Acetobacteraceae     | 1  | 0 | 3 | 1 | 0 | 0  | 1  | 0 | 1 | 13 | 10 | 0 | 30 | 0.09 |
| Cluster3931; Proteobac Alphap Rhodospirillales           | 1  | 4 | 3 | 2 | 1 | 8  | 2  | 2 | 4 | 1  | 2  | 0 | 30 | 0.09 |
| Cluster12534 Acidobact Acidobacteria_Gp3 Gp3             | 0  | 9 | 0 | 1 | 0 | 4  | 0  | 2 | 5 | 0  | 1  | 8 | 30 | 0.09 |
| Cluster17212 Verrucom Opitut; Opitu Opituta Opitutus     | 2  | 0 | 0 | 0 | 0 | 25 | 0  | 0 | 1 | 2  | 0  | 0 | 30 | 0.09 |
| Cluster18572 Proteobac Gamm Xantl Sinobac Steroidobacter | 1  | 6 | 2 | 2 | 2 | 2  | 0  | 2 | 4 | 3  | 2  | 4 | 30 | 0.09 |
| Cluster569;si Acidobact Acidobacteria_Gp1 Gp1            | 4  | 0 | 1 | 2 | 6 | 2  | 2  | 1 | 3 | 7  | 1  | 0 | 29 | 0.08 |

|                                                            |   |    |   |   |   |    |   |   |   |   |    |    |    |      |
|------------------------------------------------------------|---|----|---|---|---|----|---|---|---|---|----|----|----|------|
| Cluster596;si Armatimc Armati Arma Armatin Armatimonas/    | 4 | 0  | 3 | 0 | 0 | 2  | 2 | 9 | 6 | 1 | 0  | 2  | 29 | 0.08 |
| Cluster716;si Gemmatir Gemm Gemı Gemma Gemmatimona         | 0 | 12 | 0 | 1 | 2 | 3  | 2 | 1 | 2 | 0 | 2  | 4  | 29 | 0.08 |
| Cluster1612; Proteobac Deltap Myxc Polyangiaceae           | 2 | 2  | 4 | 1 | 3 | 3  | 1 | 1 | 1 | 0 | 8  | 3  | 29 | 0.08 |
| Cluster4595; Proteobac Alphap Rhodospirillales             | 1 | 5  | 0 | 0 | 3 | 2  | 1 | 3 | 8 | 0 | 0  | 6  | 29 | 0.08 |
| Cluster5284; Proteobac Alphap Rhizobiales                  | 1 | 3  | 2 | 0 | 3 | 3  | 5 | 1 | 7 | 0 | 2  | 2  | 29 | 0.08 |
| Cluster10788 Proteobac Alphap Rhizc Bradyrh Bradyrhizobiur | 3 | 1  | 0 | 3 | 3 | 1  | 3 | 0 | 7 | 5 | 0  | 3  | 29 | 0.08 |
| Cluster348;si Acidobact Acidobacteria_Gp3 Gp3              | 3 | 1  | 3 | 2 | 1 | 3  | 2 | 3 | 3 | 5 | 1  | 1  | 28 | 0.08 |
| Cluster963;si Actinobac Actinol Actin Actinosı Actinospica | 3 | 1  | 3 | 0 | 2 | 1  | 2 | 4 | 2 | 5 | 3  | 2  | 28 | 0.08 |
| Cluster2236; Acidobact Acidobacteria_Gp2 Gp2               | 0 | 3  | 2 | 2 | 6 | 3  | 1 | 2 | 5 | 0 | 4  | 0  | 28 | 0.08 |
| Cluster2887; Acidobact Acidobacteria_Gp1 Gp1               | 1 | 2  | 3 | 1 | 0 | 10 | 7 | 1 | 1 | 0 | 1  | 1  | 28 | 0.08 |
| Cluster13361 Acidobact Acidobacteria_Gp1 Gp1               | 0 | 3  | 1 | 5 | 0 | 0  | 0 | 1 | 3 | 8 | 3  | 4  | 28 | 0.08 |
| Cluster28140 Bacteroid Sphing Sphir Sphingo Mucilaginicact | 3 | 2  | 2 | 0 | 0 | 8  | 5 | 6 | 2 | 0 | 0  | 0  | 28 | 0.08 |
| Cluster161;si Verrucom Spartobacteria Spartobacteria       | 3 | 4  | 0 | 1 | 7 | 0  | 3 | 4 | 2 | 0 | 0  | 3  | 27 | 0.08 |
| Cluster1386; Chloroflex Ktedor Ktedonobacterales           | 1 | 3  | 1 | 2 | 0 | 6  | 3 | 5 | 5 | 0 | 1  | 0  | 27 | 0.08 |
| Cluster2179; Firmicutes                                    | 2 | 2  | 3 | 4 | 2 | 4  | 4 | 2 | 0 | 1 | 3  | 0  | 27 | 0.08 |
| Cluster2828; Acidobact Acidobacteria_Gp2 Gp2               | 5 | 6  | 0 | 2 | 1 | 0  | 4 | 1 | 2 | 0 | 1  | 5  | 27 | 0.08 |
| Cluster3829; Acidobact Acidobacteria_Gp1 Gp1               | 2 | 0  | 2 | 2 | 2 | 8  | 5 | 2 | 2 | 1 | 1  | 0  | 27 | 0.08 |
| Cluster5652; Acidobact Acidobacteria_Gp2 Gp2               | 3 | 1  | 2 | 4 | 1 | 1  | 1 | 2 | 1 | 0 | 6  | 5  | 27 | 0.08 |
| Cluster5731; Acidobact Acidobacteria_Gp2 Gp2               | 0 | 0  | 4 | 2 | 3 | 1  | 1 | 3 | 2 | 1 | 10 | 0  | 27 | 0.08 |
| Cluster13474 Acidobact Acidobacteria_Gp3 Gp3               | 1 | 0  | 2 | 1 | 0 | 8  | 8 | 2 | 3 | 2 | 0  | 0  | 27 | 0.08 |
| Cluster14203 Acidobact Acidobacteria_Gp1 Gp1               | 3 | 9  | 1 | 0 | 0 | 0  | 1 | 0 | 0 | 0 | 0  | 13 | 27 | 0.08 |
| Cluster14439 Acidobact Acidobacteria_Gp1                   | 1 | 4  | 2 | 5 | 5 | 0  | 1 | 1 | 3 | 3 | 1  | 1  | 27 | 0.08 |
| Cluster14637 Proteobac Alphap Alphaproteok Rhizomicrobiu   | 1 | 0  | 3 | 0 | 0 | 1  | 3 | 5 | 3 | 8 | 2  | 1  | 27 | 0.08 |
| Cluster15060 Acidobact Acidobacteria_Gp3                   | 0 | 5  | 0 | 0 | 3 | 3  | 3 | 2 | 8 | 0 | 1  | 2  | 27 | 0.08 |
| Cluster18909 Proteobac Betapr Burkl Burkhol Burkholderia   | 9 | 0  | 3 | 0 | 1 | 5  | 1 | 3 | 3 | 1 | 1  | 0  | 27 | 0.08 |
| Cluster26051 Proteobac Alphap Caulc Caulobæ Phenylobacter  | 3 | 0  | 1 | 1 | 4 | 3  | 3 | 1 | 0 | 7 | 4  | 0  | 27 | 0.08 |
| Cluster6;size: Acidobact Acidobacteria_Gp2 Gp2             | 5 | 0  | 2 | 2 | 3 | 3  | 1 | 1 | 4 | 4 | 1  | 0  | 26 | 0.08 |
| Cluster2057; Proteobac Gamm Xantl Sinobac Steroidobacter   | 2 | 2  | 4 | 4 | 0 | 2  | 1 | 0 | 0 | 8 | 1  | 2  | 26 | 0.08 |
| Cluster5803; Proteobac Deltap Myxococcales                 | 5 | 1  | 1 | 1 | 5 | 6  | 1 | 2 | 0 | 2 | 2  | 0  | 26 | 0.08 |

|                                                           |   |    |   |   |   |   |    |   |   |    |   |    |    |      |
|-----------------------------------------------------------|---|----|---|---|---|---|----|---|---|----|---|----|----|------|
| Cluster7153; Proteobac Betapr Burkl Burkhol Burkholderia  | 5 | 1  | 2 | 2 | 1 | 3 | 0  | 8 | 2 | 1  | 0 | 1  | 26 | 0.08 |
| Cluster25876; Bacteroid Sphing Sphir Chitinophagaceae     | 3 | 1  | 2 | 1 | 0 | 6 | 1  | 4 | 0 | 2  | 2 | 4  | 26 | 0.08 |
| Cluster929; si Gemmatir Gemm Gemı Gemma Gemmatimonas      | 0 | 6  | 0 | 0 | 0 | 0 | 2  | 1 | 4 | 0  | 0 | 12 | 25 | 0.07 |
| Cluster1152; Acidobact Acidobacteria_Gp2 Gp2              | 2 | 7  | 1 | 3 | 2 | 1 | 2  | 3 | 3 | 0  | 1 | 0  | 25 | 0.07 |
| Cluster2735; Proteobac Alphaq Rhizobiales                 | 1 | 5  | 2 | 1 | 2 | 1 | 2  | 3 | 2 | 0  | 1 | 5  | 25 | 0.07 |
| Cluster6130; Verrucom Subdivision3 Subdivision3_ξ         | 1 | 1  | 0 | 1 | 7 | 1 | 3  | 1 | 0 | 1  | 5 | 4  | 25 | 0.07 |
| Cluster8297; Actinobac Actinol Actin Mycoba Mycobacteriur | 2 | 2  | 2 | 2 | 1 | 3 | 2  | 1 | 0 | 1  | 8 | 1  | 25 | 0.07 |
| Cluster23562; Proteobac Gamm Xantl Sinobac Steroidobacter | 0 | 0  | 0 | 0 | 1 | 2 | 0  | 0 | 2 | 20 | 0 | 0  | 25 | 0.07 |
| Cluster24294; Proteobac Alphaq Caulc Caulobacteraceae     | 5 | 1  | 2 | 1 | 2 | 3 | 4  | 1 | 0 | 4  | 1 | 1  | 25 | 0.07 |
| Cluster433; si Proteobac Alphaq Rhodospirillales          | 1 | 4  | 0 | 1 | 1 | 1 | 2  | 5 | 3 | 1  | 1 | 4  | 24 | 0.07 |
| Cluster1411; Acidobact Acidobacteria_Gp3 Gp3              | 4 | 0  | 0 | 5 | 1 | 3 | 2  | 3 | 4 | 1  | 0 | 1  | 24 | 0.07 |
| Cluster1489; Verrucom Opitutae                            | 3 | 2  | 0 | 1 | 1 | 1 | 0  | 0 | 0 | 15 | 0 | 1  | 24 | 0.07 |
| Cluster1853; size=156                                     | 2 | 1  | 4 | 4 | 1 | 3 | 2  | 0 | 2 | 3  | 2 | 0  | 24 | 0.07 |
| Cluster2385; Proteobac Betapr Burkl Burkhol Burkholderia  | 2 | 2  | 1 | 0 | 0 | 3 | 4  | 3 | 3 | 0  | 0 | 6  | 24 | 0.07 |
| Cluster2941; Verrucom Spartobacteria Spartobacteria       | 0 | 1  | 0 | 2 | 1 | 2 | 16 | 0 | 1 | 0  | 1 | 0  | 24 | 0.07 |
| Cluster3520; Bacteroid Sphing Sphir Chitinophagaceae      | 4 | 1  | 0 | 0 | 3 | 2 | 0  | 5 | 1 | 0  | 1 | 7  | 24 | 0.07 |
| Cluster4273; Actinobac Actinol Actin Mycoba Mycobacteriur | 2 | 1  | 3 | 2 | 2 | 0 | 3  | 3 | 0 | 2  | 4 | 2  | 24 | 0.07 |
| Cluster4570; Proteobac Alphaq Rhod Rhodospirillaceae      | 1 | 2  | 0 | 2 | 1 | 1 | 2  | 1 | 6 | 0  | 4 | 4  | 24 | 0.07 |
| Cluster4600; size=54                                      | 9 | 1  | 0 | 0 | 8 | 0 | 0  | 2 | 4 | 0  | 0 | 0  | 24 | 0.07 |
| Cluster7609; Proteobac Alphaq Rhizc Hyphomicrobiaceae     | 1 | 1  | 1 | 4 | 4 | 1 | 2  | 3 | 2 | 2  | 1 | 2  | 24 | 0.07 |
| Cluster8525; Acidobact Acidobacteria_Gp2 Gp2              | 0 | 2  | 5 | 5 | 1 | 0 | 0  | 0 | 2 | 2  | 5 | 2  | 24 | 0.07 |
| Cluster11371; Gemmatir Gemm Gemı Gemma Gemmatimonas       | 3 | 1  | 1 | 1 | 3 | 7 | 1  | 0 | 1 | 4  | 2 | 0  | 24 | 0.07 |
| Cluster13363; Acidobact Acidobacteria_Gp1 Gp1             | 0 | 0  | 0 | 0 | 1 | 7 | 4  | 3 | 1 | 0  | 3 | 5  | 24 | 0.07 |
| Cluster15086; size=164                                    | 1 | 3  | 4 | 1 | 1 | 2 | 0  | 0 | 4 | 1  | 1 | 6  | 24 | 0.07 |
| Cluster10; sizı Acidobact Acidobacteria_Gp2 Gp2           | 1 | 2  | 0 | 1 | 1 | 2 | 5  | 0 | 0 | 4  | 5 | 2  | 23 | 0.07 |
| Cluster91; sizı Acidobact Acidobacteria_Gp1               | 2 | 1  | 6 | 2 | 1 | 2 | 0  | 0 | 2 | 3  | 2 | 2  | 23 | 0.07 |
| Cluster136; si Proteobac Deltap Myxc Polyangiaceae        | 2 | 2  | 1 | 0 | 2 | 4 | 1  | 0 | 5 | 3  | 3 | 0  | 23 | 0.07 |
| Cluster269; si Acidobact Acidobacteria_Gp1 Gp1            | 1 | 10 | 0 | 0 | 1 | 0 | 1  | 2 | 6 | 0  | 1 | 1  | 23 | 0.07 |
| Cluster1359; Acidobacteria                                | 0 | 2  | 1 | 1 | 2 | 2 | 2  | 4 | 3 | 4  | 2 | 0  | 23 | 0.07 |

|                                                               |   |    |   |   |   |   |   |   |   |    |   |   |    |      |
|---------------------------------------------------------------|---|----|---|---|---|---|---|---|---|----|---|---|----|------|
| Cluster1676; Bacteroid Sphing Sphir Chitinophagaceae          | 4 | 1  | 1 | 1 | 2 | 4 | 1 | 4 | 1 | 1  | 0 | 3 | 23 | 0.07 |
| Cluster1869; Nitrospira Nitrosq Nitro Nitrospi Nitrospira     | 0 | 11 | 2 | 1 | 0 | 0 | 2 | 1 | 1 | 0  | 1 | 4 | 23 | 0.07 |
| Cluster2869; Actinobac Actinol Acidi Acidimii Aciditerrimona  | 0 | 2  | 5 | 0 | 1 | 3 | 1 | 1 | 4 | 4  | 2 | 0 | 23 | 0.07 |
| Cluster4082; Bacteroid Sphing Sphir Chitinophagaceae          | 2 | 0  | 2 | 1 | 1 | 4 | 0 | 2 | 3 | 4  | 4 | 0 | 23 | 0.07 |
| Cluster4282; Proteobac Gammaproteobacteria                    | 5 | 3  | 6 | 0 | 1 | 1 | 0 | 0 | 3 | 3  | 0 | 1 | 23 | 0.07 |
| Cluster5539; Proteobac Alphaproteobacteria                    | 0 | 5  | 1 | 2 | 1 | 2 | 0 | 5 | 4 | 1  | 0 | 2 | 23 | 0.07 |
| Cluster7724; Verrucom Subdivision3 Subdivision3_ξ             | 2 | 0  | 2 | 2 | 0 | 3 | 2 | 2 | 2 | 0  | 3 | 5 | 23 | 0.07 |
| Cluster8005; Acidobact Acidobacteria_Gp1                      | 5 | 2  | 6 | 1 | 4 | 0 | 0 | 1 | 0 | 2  | 1 | 1 | 23 | 0.07 |
| Cluster259;si Proteobac Betaproteobacteria                    | 0 | 2  | 3 | 2 | 2 | 3 | 0 | 2 | 5 | 0  | 2 | 1 | 22 | 0.06 |
| Cluster343;si Bacteroid Sphing Sphir Chitinoq Flavisolibacter | 3 | 5  | 1 | 1 | 1 | 5 | 3 | 0 | 2 | 0  | 1 | 0 | 22 | 0.06 |
| Cluster547;si Acidobact Acidobacteria_Gp3 Gp3                 | 0 | 1  | 2 | 4 | 0 | 1 | 2 | 0 | 1 | 3  | 5 | 3 | 22 | 0.06 |
| Cluster871;si Verrucom Opitut; Opitu Opituta Opitutus         | 1 | 0  | 1 | 0 | 1 | 5 | 0 | 3 | 5 | 3  | 1 | 2 | 22 | 0.06 |
| Cluster996;si Acidobact Acidobacteria_Gp1                     | 1 | 2  | 0 | 0 | 0 | 2 | 3 | 3 | 3 | 0  | 1 | 7 | 22 | 0.06 |
| Cluster2572; Acidobact Acidobacteria_Gp3 Gp3                  | 1 | 1  | 0 | 2 | 0 | 4 | 6 | 4 | 2 | 0  | 1 | 1 | 22 | 0.06 |
| Cluster4510; Verrucom Subdivision3 Subdivision3_ξ             | 0 | 1  | 0 | 0 | 1 | 2 | 3 | 2 | 7 | 0  | 2 | 4 | 22 | 0.06 |
| Cluster12413 Acidobact Acidobacteria_Gp1                      | 4 | 1  | 2 | 1 | 0 | 0 | 2 | 4 | 1 | 4  | 2 | 1 | 22 | 0.06 |
| Cluster14698 Acidobact Acidobacteria_Gp1 Gp1                  | 1 | 1  | 1 | 1 | 3 | 3 | 3 | 1 | 1 | 6  | 1 | 0 | 22 | 0.06 |
| Cluster14701 Acidobact Acidobacteria_Gp1                      | 1 | 3  | 3 | 2 | 3 | 2 | 1 | 1 | 0 | 0  | 2 | 4 | 22 | 0.06 |
| Cluster16636 Acidobact Acidobacteria_Gp1 Gp1                  | 1 | 0  | 0 | 5 | 4 | 4 | 0 | 0 | 2 | 5  | 1 | 0 | 22 | 0.06 |
| Cluster18200 Acidobact Acidobacteria_Gp3 Gp3                  | 1 | 3  | 0 | 2 | 2 | 5 | 1 | 0 | 3 | 4  | 0 | 1 | 22 | 0.06 |
| Cluster22274 Acidobact Acidobacteria_Gp1 Gp1                  | 3 | 0  | 2 | 0 | 4 | 3 | 3 | 0 | 1 | 2  | 1 | 3 | 22 | 0.06 |
| Cluster124;size=128                                           | 2 | 1  | 0 | 1 | 5 | 1 | 5 | 2 | 1 | 2  | 1 | 0 | 21 | 0.06 |
| Cluster276;si Proteobac Alphaq Rhizc Bradyrhizobiaceae        | 0 | 6  | 1 | 2 | 0 | 1 | 0 | 0 | 2 | 4  | 2 | 3 | 21 | 0.06 |
| Cluster848;si Acidobact Acidobacteria_Gp3                     | 3 | 1  | 6 | 2 | 2 | 2 | 1 | 0 | 3 | 1  | 0 | 0 | 21 | 0.06 |
| Cluster1787; Verrucom Opitut; Opitu Opituta Opitutus          | 4 | 0  | 1 | 0 | 0 | 4 | 0 | 0 | 0 | 12 | 0 | 0 | 21 | 0.06 |
| Cluster2017; Verrucom Opitutae                                | 0 | 5  | 0 | 1 | 0 | 0 | 0 | 0 | 0 | 9  | 3 | 3 | 21 | 0.06 |
| Cluster2376; Proteobac Gamm Xantl Xanthor Rhodanobacte        | 2 | 0  | 1 | 1 | 4 | 2 | 6 | 1 | 2 | 2  | 0 | 0 | 21 | 0.06 |
| Cluster2836; Verrucom Subdivision3 Subdivision3_ξ             | 0 | 1  | 3 | 0 | 2 | 1 | 4 | 4 | 5 | 0  | 0 | 1 | 21 | 0.06 |
| Cluster3195; Proteobac Alphaq Alphaproteok Rhizomicrobiu      | 1 | 1  | 2 | 1 | 2 | 2 | 1 | 1 | 2 | 7  | 1 | 0 | 21 | 0.06 |

|                                                              |   |    |   |   |   |   |   |   |   |    |   |   |    |      |
|--------------------------------------------------------------|---|----|---|---|---|---|---|---|---|----|---|---|----|------|
| Cluster3237; Proteobac Alphap Rhodospirillales               | 1 | 1  | 2 | 2 | 5 | 0 | 1 | 0 | 2 | 5  | 2 | 0 | 21 | 0.06 |
| Cluster3676; Bacteroid Sphing Sphir Chitinophagaceae         | 1 | 3  | 2 | 0 | 3 | 2 | 1 | 3 | 1 | 4  | 0 | 1 | 21 | 0.06 |
| Cluster3797; Proteobac Alphap Rhizobiales                    | 0 | 1  | 3 | 2 | 0 | 3 | 0 | 0 | 1 | 2  | 4 | 5 | 21 | 0.06 |
| Cluster4610; Proteobac Alphap Rhodospirillales               | 4 | 3  | 0 | 0 | 2 | 1 | 0 | 4 | 4 | 0  | 1 | 2 | 21 | 0.06 |
| Cluster4659; Proteobac Gammaproteobacteria                   | 1 | 5  | 0 | 0 | 0 | 1 | 0 | 1 | 2 | 0  | 5 | 6 | 21 | 0.06 |
| Cluster6798; Proteobac Deltap Myxococcales                   | 1 | 2  | 1 | 0 | 3 | 3 | 1 | 2 | 4 | 1  | 0 | 3 | 21 | 0.06 |
| Cluster10901 Proteobac Alphaproteobacteria                   | 3 | 4  | 0 | 0 | 0 | 2 | 3 | 3 | 0 | 0  | 1 | 5 | 21 | 0.06 |
| Cluster13304 Acidobact Acidobacteria_Gp1                     | 0 | 2  | 4 | 1 | 5 | 0 | 1 | 0 | 0 | 7  | 1 | 0 | 21 | 0.06 |
| Cluster14009 Acidobact Acidobacteria_Gp1 Edaphobacter        | 5 | 3  | 1 | 6 | 0 | 0 | 0 | 0 | 0 | 1  | 3 | 2 | 21 | 0.06 |
| Cluster18715 Acidobact Acidobacteria_Gp3 Gp3                 | 3 | 0  | 2 | 2 | 4 | 0 | 0 | 0 | 3 | 6  | 1 | 0 | 21 | 0.06 |
| Cluster27003 Bacteroid Sphing Sphir Chitinophagaceae         | 1 | 0  | 4 | 1 | 1 | 1 | 0 | 0 | 0 | 7  | 5 | 1 | 21 | 0.06 |
| Cluster15;size Proteobac Alphap Rhizc Bradyrh Bradyrhizobiur | 3 | 6  | 0 | 1 | 0 | 0 | 0 | 1 | 1 | 3  | 3 | 2 | 20 | 0.06 |
| Cluster84;size Proteobac Alphap Rhizc Hyphomicrobiaceae      | 4 | 2  | 1 | 0 | 3 | 0 | 0 | 2 | 3 | 5  | 0 | 0 | 20 | 0.06 |
| Cluster427;si Verrucom Opitut; Opitu Opituta Opitutus        | 2 | 1  | 1 | 2 | 0 | 7 | 0 | 0 | 0 | 6  | 0 | 1 | 20 | 0.06 |
| Cluster1794; Bacteroid Sphing Sphir Chitinophagaceae         | 2 | 1  | 2 | 1 | 2 | 0 | 0 | 0 | 1 | 7  | 3 | 1 | 20 | 0.06 |
| Cluster2186; Actinobac Actinobacteria                        | 2 | 0  | 4 | 2 | 0 | 1 | 0 | 2 | 3 | 3  | 1 | 2 | 20 | 0.06 |
| Cluster2300; Bacteroid Sphing Sphir Chitinophagaceae         | 2 | 1  | 2 | 0 | 5 | 1 | 1 | 1 | 0 | 4  | 3 | 0 | 20 | 0.06 |
| Cluster3281; Acidobact Acidobacteria_Gp1 Edaphobacter        | 2 | 0  | 3 | 1 | 0 | 2 | 1 | 2 | 0 | 4  | 3 | 2 | 20 | 0.06 |
| Cluster4895; Bacteroid Sphing Sphir Sphingo Mucilagibact     | 0 | 2  | 2 | 0 | 0 | 2 | 4 | 2 | 3 | 1  | 2 | 2 | 20 | 0.06 |
| Cluster5661; Proteobac Alphaproteobacteria                   | 0 | 2  | 1 | 3 | 0 | 4 | 1 | 0 | 7 | 0  | 2 | 0 | 20 | 0.06 |
| Cluster9859; Proteobac Alphap Rhizc Bradyrh Bradyrhizobiur   | 1 | 1  | 0 | 7 | 0 | 3 | 8 | 0 | 0 | 0  | 0 | 0 | 20 | 0.06 |
| Cluster13870 Acidobact Acidobacteria_Gp1 Gp1                 | 0 | 1  | 2 | 2 | 2 | 0 | 2 | 0 | 2 | 7  | 1 | 1 | 20 | 0.06 |
| Cluster15555 Acidobact Acidobacteria_Gp1                     | 0 | 0  | 1 | 1 | 3 | 2 | 0 | 2 | 6 | 2  | 2 | 1 | 20 | 0.06 |
| Cluster18407 Proteobac Alphap Rhod Acetobacteraceae          | 2 | 0  | 1 | 5 | 1 | 6 | 0 | 1 | 1 | 0  | 2 | 1 | 20 | 0.06 |
| Cluster5;size Acidobact Acidobacteria_Gp2 Gp2                | 0 | 9  | 0 | 0 | 1 | 0 | 0 | 1 | 2 | 1  | 0 | 5 | 19 | 0.06 |
| Cluster85;size Proteobac Gamm Xanthomonadales                | 2 | 1  | 1 | 0 | 0 | 0 | 0 | 0 | 0 | 14 | 0 | 1 | 19 | 0.06 |
| Cluster263;si Acidobact Acidobacteria_Gp3 Gp3                | 0 | 14 | 0 | 0 | 1 | 0 | 0 | 0 | 0 | 0  | 1 | 3 | 19 | 0.06 |
| Cluster417;si Proteobac Alphap Rhodospirillales              | 0 | 0  | 4 | 3 | 2 | 2 | 1 | 5 | 1 | 0  | 1 | 0 | 19 | 0.06 |
| Cluster435;si Verrucom Opitut; Opitu Opituta Opitutus        | 1 | 1  | 0 | 1 | 0 | 3 | 0 | 0 | 0 | 13 | 0 | 0 | 19 | 0.06 |

|                                                          |   |   |   |   |   |   |   |   |   |    |   |   |    |      |
|----------------------------------------------------------|---|---|---|---|---|---|---|---|---|----|---|---|----|------|
| Cluster470;si Verrucom Opitut:Opitu Opituta Opitutus     | 2 | 3 | 1 | 0 | 1 | 4 | 0 | 0 | 0 | 1  | 0 | 7 | 19 | 0.06 |
| Cluster521;si Acidobact Acidobacteria_Gp1                | 6 | 3 | 0 | 1 | 2 | 1 | 1 | 3 | 0 | 1  | 0 | 1 | 19 | 0.06 |
| Cluster632;si Acidobact Acidobacteria_Gp2 Gp2            | 0 | 0 | 3 | 4 | 0 | 1 | 0 | 0 | 0 | 5  | 5 | 1 | 19 | 0.06 |
| Cluster652;si Acidobact Acidobacteria_Gp2 Gp2            | 1 | 3 | 1 | 2 | 1 | 0 | 2 | 1 | 1 | 5  | 0 | 2 | 19 | 0.06 |
| Cluster1543; Proteobac Alphaproteobacteria               | 0 | 0 | 0 | 3 | 2 | 2 | 2 | 2 | 3 | 2  | 2 | 1 | 19 | 0.06 |
| Cluster1576; Actinobac Actinol Actin Actinos Actinospica | 1 | 1 | 1 | 2 | 0 | 1 | 1 | 2 | 2 | 2  | 0 | 6 | 19 | 0.06 |
| Cluster1627; Acidobact Acidobacteria_Gp2 Gp2             | 0 | 2 | 0 | 0 | 0 | 0 | 0 | 4 | 5 | 0  | 1 | 7 | 19 | 0.06 |
| Cluster1784; Bacteroid Sphing Sphir Chitino  Flavitalea  | 0 | 0 | 2 | 1 | 3 | 3 | 3 | 1 | 3 | 2  | 1 | 0 | 19 | 0.06 |
| Cluster2936; Verrucom Subdivision3 Subdivision3_ξ        | 2 | 1 | 2 | 0 | 4 | 2 | 2 | 1 | 2 | 0  | 2 | 1 | 19 | 0.06 |
| Cluster3803; Proteobac Alphap Rhizc Xantho  Pseudolabrys | 1 | 0 | 1 | 2 | 3 | 0 | 1 | 2 | 1 | 1  | 6 | 1 | 19 | 0.06 |
| Cluster9200; Proteobac Alphap Rhodospirillales           | 6 | 5 | 0 | 0 | 0 | 0 | 2 | 2 | 0 | 0  | 0 | 4 | 19 | 0.06 |
| Cluster14177 Acidobact Acidobacteria_Gp1 Granulicella    | 1 | 4 | 2 | 1 | 0 | 2 | 1 | 0 | 0 | 2  | 1 | 5 | 19 | 0.06 |
| Cluster14675 Verrucom Opitut:Opitu Opituta Opitutus      | 1 | 5 | 1 | 0 | 3 | 1 | 0 | 0 | 0 | 3  | 0 | 5 | 19 | 0.06 |
| Cluster14852 Acidobact Acidobacteria_Gp1 Gp1             | 0 | 1 | 3 | 4 | 1 | 0 | 0 | 0 | 0 | 1  | 6 | 3 | 19 | 0.06 |
| Cluster16867 Acidobact Acidobacteria_Gp1 Gp1             | 0 | 0 | 2 | 4 | 0 | 0 | 0 | 0 | 0 | 6  | 7 | 0 | 19 | 0.06 |
| Cluster17007 Verrucom Opitut:Opitu Opituta Opitutus      | 1 | 0 | 0 | 0 | 0 | 6 | 0 | 0 | 2 | 9  | 1 | 0 | 19 | 0.06 |
| Cluster17347 Verrucom Opitut:Opitu Opituta Opitutus      | 0 | 0 | 0 | 1 | 0 | 3 | 0 | 0 | 0 | 15 | 0 | 0 | 19 | 0.06 |
| Cluster22248 Bacteroid Sphing Sphir Chitinophagaceae     | 0 | 4 | 0 | 0 | 0 | 6 | 1 | 3 | 1 | 0  | 0 | 4 | 19 | 0.06 |
| Cluster22809 Proteobac Gamm Xant  Sinobac Steroidobacter | 0 | 0 | 5 | 0 | 0 | 3 | 1 | 0 | 0 | 7  | 3 | 0 | 19 | 0.06 |
| Cluster23477 Acidobact Acidobacteria_Gp2 Gp2             | 0 | 0 | 0 | 8 | 2 | 1 | 1 | 2 | 1 | 1  | 1 | 2 | 19 | 0.06 |
| Cluster25863 Proteobac Alphap Alphaproteok Rhizomicrobiu | 0 | 0 | 0 | 4 | 1 | 2 | 0 | 1 | 0 | 8  | 3 | 0 | 19 | 0.06 |
| Cluster11;si Acidobact Acidobacteria_Gp3                 | 1 | 2 | 0 | 0 | 2 | 4 | 0 | 0 | 4 | 0  | 2 | 3 | 18 | 0.05 |
| Cluster198;si Acidobact Acidobacteria_Gp2 Gp2            | 2 | 3 | 1 | 1 | 0 | 2 | 0 | 4 | 0 | 3  | 1 | 1 | 18 | 0.05 |
| Cluster323;si Proteobac Alphap Rhizc Rhizobi  Bauldia    | 2 | 2 | 0 | 2 | 3 | 0 | 1 | 1 | 2 | 0  | 1 | 4 | 18 | 0.05 |
| Cluster643;si Proteobac Alphap Rhod Acetobacteraceae     | 1 | 0 | 1 | 3 | 0 | 0 | 0 | 0 | 0 | 11 | 2 | 0 | 18 | 0.05 |
| Cluster759;si Acidobact Acidobacteria_Gp1 Gp1            | 0 | 4 | 0 | 1 | 2 | 0 | 1 | 4 | 2 | 1  | 1 | 2 | 18 | 0.05 |
| Cluster916;si Acidobact Acidobacteria_Gp3 Gp3            | 3 | 0 | 2 | 1 | 2 | 3 | 0 | 0 | 4 | 3  | 0 | 0 | 18 | 0.05 |
| Cluster1171; Proteobac Alphap Alphaproteok Rhizomicrobiu | 1 | 1 | 1 | 1 | 1 | 2 | 1 | 0 | 2 | 4  | 2 | 2 | 18 | 0.05 |
| Cluster1517; Acidobact Acidobacteria_Gp2 Gp2             | 5 | 1 | 1 | 1 | 0 | 2 | 0 | 0 | 3 | 2  | 2 | 1 | 18 | 0.05 |



|                                                            |   |    |   |   |   |   |   |   |   |   |   |   |    |      |
|------------------------------------------------------------|---|----|---|---|---|---|---|---|---|---|---|---|----|------|
| Cluster1588; Bacteroid Sphing Sphir Chitinophagaceae       | 6 | 0  | 1 | 0 | 2 | 1 | 0 | 4 | 1 | 2 | 0 | 1 | 18 | 0.05 |
| Cluster1920; Proteobac Alphap Rhodospirillales             | 1 | 6  | 0 | 0 | 0 | 1 | 1 | 1 | 3 | 0 | 1 | 4 | 18 | 0.05 |
| Cluster2151; Proteobac Betaproteobacteria                  | 0 | 10 | 0 | 0 | 0 | 0 | 1 | 2 | 1 | 0 | 0 | 4 | 18 | 0.05 |
| Cluster2227; Proteobac Gamm Xantl Xanthomonadaceae         | 2 | 2  | 2 | 0 | 1 | 1 | 0 | 0 | 1 | 8 | 1 | 0 | 18 | 0.05 |
| Cluster2344; Acidobact Acidobacteria_Gp3                   | 3 | 0  | 1 | 0 | 1 | 2 | 0 | 1 | 1 | 3 | 6 | 0 | 18 | 0.05 |
| Cluster2806; Acidobact Acidobacteria_Gp2 Gp2               | 1 | 1  | 2 | 2 | 0 | 1 | 2 | 4 | 0 | 0 | 5 | 0 | 18 | 0.05 |
| Cluster3815; Acidobact Acidobacteria_Gp2 Gp2               | 1 | 1  | 0 | 1 | 2 | 2 | 4 | 2 | 0 | 3 | 0 | 2 | 18 | 0.05 |
| Cluster4314; Proteobac Alphap Rhizc Bradyrh Bradyrhizobiur | 0 | 2  | 0 | 0 | 3 | 2 | 0 | 5 | 3 | 0 | 2 | 1 | 18 | 0.05 |
| Cluster6334; Acidobact Acidobacteria_Gp3 Gp3               | 1 | 2  | 2 | 0 | 0 | 5 | 4 | 0 | 3 | 0 | 0 | 1 | 18 | 0.05 |
| Cluster6688; Acidobact Acidobacteria_Gp3                   | 0 | 2  | 0 | 0 | 1 | 2 | 2 | 1 | 9 | 0 | 0 | 1 | 18 | 0.05 |
| Cluster8202; Proteobac Alphap Rhod Rhodospirillaceae       | 2 | 1  | 5 | 1 | 5 | 1 | 0 | 1 | 2 | 0 | 0 | 0 | 18 | 0.05 |
| Cluster8535; Verrucom Spartobacteria Spartobacteria        | 0 | 0  | 1 | 0 | 1 | 1 | 3 | 5 | 1 | 0 | 1 | 5 | 18 | 0.05 |
| Cluster9406;size=110                                       | 1 | 3  | 1 | 1 | 0 | 2 | 3 | 1 | 1 | 0 | 3 | 2 | 18 | 0.05 |
| Cluster13214 Acidobact Acidobacteria_Gp1 Gp1               | 0 | 1  | 3 | 6 | 0 | 1 | 1 | 2 | 2 | 0 | 1 | 1 | 18 | 0.05 |
| Cluster24641 Actinobac Actinol Actinomycetales             | 1 | 1  | 1 | 0 | 2 | 2 | 3 | 1 | 3 | 3 | 1 | 0 | 18 | 0.05 |
| Cluster27132 Bacteroid Sphing Sphir Chitinophagaceae       | 3 | 0  | 2 | 0 | 1 | 3 | 2 | 1 | 0 | 1 | 3 | 2 | 18 | 0.05 |
| Cluster393;size=141                                        | 0 | 2  | 0 | 0 | 1 | 0 | 2 | 0 | 6 | 0 | 2 | 4 | 17 | 0.05 |
| Cluster472;size=58                                         | 2 | 0  | 2 | 1 | 2 | 2 | 1 | 2 | 4 | 1 | 0 | 0 | 17 | 0.05 |
| Cluster630;si Proteobac Gammaproteobacteria                | 5 | 0  | 2 | 2 | 1 | 0 | 1 | 0 | 2 | 1 | 2 | 1 | 17 | 0.05 |
| Cluster655;si Armatimonadetes Armatimonade                 | 1 | 6  | 0 | 0 | 0 | 1 | 0 | 4 | 2 | 0 | 1 | 2 | 17 | 0.05 |
| Cluster760;si Acidobact Acidobacteria_Gp3 Bryobacter       | 0 | 1  | 1 | 0 | 2 | 0 | 0 | 3 | 2 | 0 | 1 | 7 | 17 | 0.05 |
| Cluster818;si Proteobac Alphap Caulc Cauloba Caulobacter   | 3 | 0  | 1 | 2 | 3 | 1 | 2 | 0 | 3 | 1 | 1 | 0 | 17 | 0.05 |
| Cluster1164; Proteobac Alphap Caulc Caulobacteraceae       | 5 | 0  | 1 | 0 | 3 | 0 | 2 | 2 | 1 | 3 | 0 | 0 | 17 | 0.05 |
| Cluster1256; Verrucom Opitut; Opitu Opituta Opitutus       | 3 | 1  | 0 | 0 | 2 | 3 | 0 | 0 | 2 | 5 | 1 | 0 | 17 | 0.05 |
| Cluster1408; Acidobact Acidobacteria_Gp2 Gp2               | 2 | 1  | 1 | 1 | 1 | 1 | 4 | 4 | 0 | 0 | 1 | 1 | 17 | 0.05 |
| Cluster1685; Actinobac Actinol Solirt Conexib Conexibacter | 0 | 1  | 1 | 0 | 1 | 2 | 2 | 5 | 1 | 1 | 2 | 1 | 17 | 0.05 |
| Cluster2144; Acidobact Acidobacteria_Gp1                   | 0 | 1  | 6 | 0 | 1 | 1 | 1 | 1 | 1 | 1 | 2 | 2 | 17 | 0.05 |
| Cluster2670; Bacteroid Sphing Sphir Chitinophagaceae       | 0 | 1  | 0 | 0 | 3 | 5 | 2 | 2 | 0 | 2 | 1 | 1 | 17 | 0.05 |
| Cluster3418; Acidobact Acidobacteria_Gp1 Gp1               | 0 | 1  | 3 | 3 | 0 | 2 | 1 | 2 | 1 | 3 | 1 | 0 | 17 | 0.05 |

|                                                            |   |   |   |   |   |    |   |   |   |    |   |   |    |      |
|------------------------------------------------------------|---|---|---|---|---|----|---|---|---|----|---|---|----|------|
| Cluster3980;size=120                                       | 0 | 2 | 1 | 1 | 1 | 3  | 0 | 4 | 2 | 0  | 2 | 1 | 17 | 0.05 |
| Cluster5824; Proteobac Gammaproteobacteria                 | 0 | 0 | 1 | 0 | 2 | 0  | 1 | 0 | 0 | 13 | 0 | 0 | 17 | 0.05 |
| Cluster6628; Bacteroid Sphing Sphir Sphingo Mucilaginibact | 0 | 0 | 5 | 3 | 1 | 0  | 2 | 1 | 1 | 4  | 0 | 0 | 17 | 0.05 |
| Cluster9546; Acidobact Acidobacteria_Gp2 Gp2               | 2 | 0 | 2 | 2 | 1 | 2  | 0 | 2 | 2 | 0  | 2 | 2 | 17 | 0.05 |
| Cluster11875 Acidobact Acidobacteria_Gp1 Edaphobacter      | 5 | 1 | 0 | 3 | 0 | 0  | 0 | 1 | 1 | 0  | 3 | 3 | 17 | 0.05 |
| Cluster11883 Verrucom Opitut: Opitu Opituta Opitutus       | 1 | 0 | 0 | 0 | 3 | 2  | 1 | 1 | 6 | 2  | 0 | 1 | 17 | 0.05 |
| Cluster13889 Acidobact Acidobacteria_Gp1                   | 2 | 1 | 2 | 0 | 3 | 0  | 1 | 2 | 3 | 0  | 2 | 1 | 17 | 0.05 |
| Cluster15315 Acidobact Acidobacteria_Gp10 Gp10             | 0 | 1 | 0 | 0 | 3 | 1  | 3 | 4 | 2 | 0  | 2 | 1 | 17 | 0.05 |
| Cluster16158 Acidobact Acidobacteria_Gp2 Gp2               | 0 | 0 | 1 | 0 | 0 | 1  | 0 | 4 | 4 | 1  | 2 | 4 | 17 | 0.05 |
| Cluster24539 Bacteroid Sphing Sphir Chitinophagaceae       | 3 | 0 | 1 | 2 | 1 | 4  | 2 | 1 | 0 | 1  | 0 | 2 | 17 | 0.05 |
| Cluster26492 Bacteroid Sphing Sphir Chitinophagaceae       | 2 | 1 | 1 | 2 | 2 | 0  | 1 | 1 | 1 | 6  | 0 | 0 | 17 | 0.05 |
| Cluster128;si Proteobac Alphap Rhodospirillales            | 2 | 2 | 1 | 0 | 3 | 0  | 0 | 1 | 2 | 0  | 2 | 3 | 16 | 0.05 |
| Cluster473;si Proteobac Deltaproteobacteria                | 1 | 3 | 1 | 3 | 1 | 1  | 0 | 1 | 0 | 1  | 4 | 0 | 16 | 0.05 |
| Cluster515;si Verrucom Subdivision3 Subdivision3_ξ         | 0 | 0 | 2 | 2 | 5 | 1  | 0 | 0 | 1 | 2  | 3 | 0 | 16 | 0.05 |
| Cluster678;si Verrucom Opitut: Opitu Opituta Opitutus      | 0 | 3 | 0 | 0 | 0 | 5  | 0 | 0 | 1 | 6  | 0 | 1 | 16 | 0.05 |
| Cluster1010; Acidobact Acidobacteria_Gp1 Gp1               | 0 | 1 | 1 | 0 | 2 | 3  | 2 | 1 | 1 | 1  | 2 | 2 | 16 | 0.05 |
| Cluster1553; Proteobac Betapr Burkli Burkholderiaceae      | 1 | 0 | 1 | 1 | 0 | 2  | 2 | 3 | 2 | 1  | 1 | 2 | 16 | 0.05 |
| Cluster1876; Acidobact Acidobacteria_Gp2 Gp2               | 1 | 0 | 2 | 4 | 0 | 0  | 4 | 0 | 1 | 0  | 1 | 3 | 16 | 0.05 |
| Cluster2064; Proteobac Alphap Caulc Caulobæ Caulobacter    | 1 | 1 | 2 | 0 | 0 | 0  | 1 | 1 | 2 | 4  | 2 | 2 | 16 | 0.05 |
| Cluster2293; Verrucom Opitut: Opitu Opituta Opitutus       | 3 | 0 | 2 | 1 | 1 | 1  | 0 | 0 | 3 | 0  | 0 | 5 | 16 | 0.05 |
| Cluster2909;size=100                                       | 1 | 2 | 0 | 0 | 0 | 10 | 3 | 0 | 0 | 0  | 0 | 0 | 16 | 0.05 |
| Cluster2928; Proteobac Alphap Alphaproteob Rhizomicrobiu   | 0 | 1 | 0 | 0 | 2 | 2  | 4 | 0 | 5 | 0  | 1 | 1 | 16 | 0.05 |
| Cluster3107;size=120                                       | 0 | 0 | 0 | 3 | 0 | 2  | 4 | 0 | 3 | 0  | 0 | 4 | 16 | 0.05 |
| Cluster3250;size=47                                        | 1 | 2 | 0 | 2 | 1 | 3  | 0 | 3 | 2 | 1  | 1 | 0 | 16 | 0.05 |
| Cluster3796; Acidobact Acidobacteria_Gp1                   | 0 | 0 | 0 | 1 | 3 | 1  | 2 | 4 | 0 | 0  | 2 | 3 | 16 | 0.05 |
| Cluster5984; Verrucom Opitut: Opitu Opituta Opitutus       | 4 | 0 | 1 | 3 | 1 | 5  | 1 | 0 | 0 | 0  | 0 | 1 | 16 | 0.05 |
| Cluster6524;size=81                                        | 2 | 1 | 1 | 2 | 0 | 4  | 1 | 1 | 3 | 0  | 0 | 1 | 16 | 0.05 |
| Cluster8219;size=99                                        | 1 | 0 | 0 | 1 | 0 | 2  | 2 | 2 | 5 | 0  | 3 | 0 | 16 | 0.05 |
| Cluster8675; Acidobact Acidobacteria_Gp2 Gp2               | 2 | 0 | 0 | 0 | 1 | 1  | 0 | 1 | 0 | 2  | 6 | 3 | 16 | 0.05 |

|                                                            |   |   |   |   |   |    |   |   |   |    |   |   |    |      |
|------------------------------------------------------------|---|---|---|---|---|----|---|---|---|----|---|---|----|------|
| Cluster9083; Acidobact Acidobacteria_Gp2 Gp2               | 2 | 0 | 1 | 1 | 1 | 3  | 1 | 4 | 1 | 2  | 0 | 0 | 16 | 0.05 |
| Cluster9570; Proteobac Gamm Xantl Sinobacteraceae          | 1 | 4 | 0 | 1 | 0 | 0  | 1 | 0 | 1 | 0  | 4 | 4 | 16 | 0.05 |
| Cluster13037 Acidobact Acidobacteria_Gp3 Gp3               | 0 | 3 | 0 | 1 | 2 | 1  | 0 | 3 | 1 | 2  | 2 | 1 | 16 | 0.05 |
| Cluster16981 Acidobact Acidobacteria_Gp1 Granulicella      | 0 | 0 | 2 | 0 | 0 | 4  | 0 | 0 | 1 | 7  | 2 | 0 | 16 | 0.05 |
| Cluster23514 Proteobac Gammaproteobacteria                 | 0 | 0 | 0 | 0 | 0 | 7  | 1 | 6 | 2 | 0  | 0 | 0 | 16 | 0.05 |
| Cluster24068 Bacteroid Sphing Sphir Sphingo Mucilaginibact | 1 | 0 | 1 | 1 | 2 | 2  | 2 | 0 | 1 | 3  | 3 | 0 | 16 | 0.05 |
| Cluster2;size: Proteobac Alphap Rhizobiales                | 3 | 3 | 0 | 0 | 0 | 2  | 0 | 4 | 0 | 0  | 1 | 2 | 15 | 0.04 |
| Cluster4;size: Acidobact Acidobacteria_Gp3 Gp3             | 2 | 2 | 0 | 1 | 0 | 1  | 0 | 3 | 5 | 0  | 1 | 0 | 15 | 0.04 |
| Cluster184;si Acidobact Acidobacteria_Gp3 Gp3              | 2 | 5 | 0 | 1 | 1 | 2  | 0 | 0 | 3 | 0  | 1 | 0 | 15 | 0.04 |
| Cluster622;si Acidobact Acidobacteria_Gp1 Edaphobacter     | 0 | 1 | 1 | 0 | 0 | 1  | 0 | 0 | 1 | 10 | 1 | 0 | 15 | 0.04 |
| Cluster623;si Acidobact Acidobacteria_Gp1                  | 1 | 1 | 1 | 4 | 2 | 0  | 0 | 1 | 1 | 2  | 2 | 0 | 15 | 0.04 |
| Cluster1116; Proteobac Alphaproteobacteria                 | 1 | 2 | 1 | 1 | 0 | 0  | 5 | 0 | 1 | 0  | 1 | 3 | 15 | 0.04 |
| Cluster1247; Acidobact Acidobacteria_Gp5 Gp5               | 0 | 3 | 0 | 0 | 0 | 2  | 2 | 3 | 1 | 0  | 2 | 2 | 15 | 0.04 |
| Cluster1446; Acidobact Acidobacteria_Gp2 Gp2               | 2 | 0 | 1 | 3 | 1 | 1  | 5 | 1 | 0 | 0  | 0 | 1 | 15 | 0.04 |
| Cluster1639; Bacteroid Sphing Sphir Chitinophagaceae       | 1 | 1 | 1 | 0 | 0 | 0  | 0 | 4 | 2 | 5  | 1 | 0 | 15 | 0.04 |
| Cluster2008; Actinobac Actinol Actin Catenul Catenulispora | 0 | 2 | 0 | 0 | 0 | 2  | 1 | 1 | 1 | 2  | 1 | 5 | 15 | 0.04 |
| Cluster2050; Acidobact Acidobacteria_Gp3 Gp3               | 1 | 0 | 1 | 1 | 0 | 3  | 3 | 0 | 5 | 1  | 0 | 0 | 15 | 0.04 |
| Cluster2125; TM7 TM7_genera_i                              | 2 | 0 | 0 | 0 | 1 | 3  | 0 | 6 | 2 | 0  | 1 | 0 | 15 | 0.04 |
| Cluster2129; Verrucom Opitut: Opitu Opituta Opitutus       | 1 | 0 | 0 | 0 | 1 | 12 | 1 | 0 | 0 | 0  | 0 | 0 | 15 | 0.04 |
| Cluster2268; Actinobac Actinol Actin Mycobacteriaceae      | 1 | 2 | 0 | 1 | 1 | 2  | 0 | 2 | 1 | 2  | 2 | 1 | 15 | 0.04 |
| Cluster3123; Bacteroid Sphing Sphir Sphingo Mucilaginibact | 2 | 1 | 0 | 0 | 0 | 4  | 0 | 2 | 0 | 4  | 1 | 1 | 15 | 0.04 |
| Cluster3256; Proteobac Alphap Rhodospirillales             | 1 | 1 | 1 | 2 | 3 | 2  | 1 | 1 | 0 | 0  | 1 | 2 | 15 | 0.04 |
| Cluster3425; Proteobac Alphap Rhod Rhodospirillaceae       | 0 | 1 | 2 | 3 | 0 | 0  | 0 | 0 | 0 | 6  | 2 | 1 | 15 | 0.04 |
| Cluster5393;size=67                                        | 2 | 1 | 0 | 0 | 0 | 0  | 0 | 1 | 7 | 1  | 0 | 3 | 15 | 0.04 |
| Cluster6289; Proteobac Alphap Rhod Acetobacteraceae        | 4 | 0 | 2 | 1 | 3 | 0  | 0 | 1 | 2 | 1  | 1 | 0 | 15 | 0.04 |
| Cluster7137; Acidobact Acidobacteria_Gp2 Gp2               | 2 | 3 | 0 | 2 | 0 | 2  | 1 | 2 | 0 | 0  | 0 | 3 | 15 | 0.04 |
| Cluster7921; Acidobact Acidobacteria_Gp2 Gp2               | 0 | 0 | 2 | 3 | 0 | 0  | 2 | 1 | 1 | 2  | 4 | 0 | 15 | 0.04 |
| Cluster9680; Proteobac Alphaproteobacteria                 | 0 | 1 | 1 | 4 | 0 | 0  | 1 | 3 | 5 | 0  | 0 | 0 | 15 | 0.04 |
| Cluster10937 Acidobact Acidobacteria_Gp3                   | 2 | 0 | 0 | 0 | 3 | 4  | 3 | 0 | 1 | 1  | 1 | 0 | 15 | 0.04 |

|                                                             |   |   |   |   |   |   |   |   |   |   |   |   |    |      |
|-------------------------------------------------------------|---|---|---|---|---|---|---|---|---|---|---|---|----|------|
| Cluster12202 Proteobac Betaproteobacteria                   | 1 | 0 | 2 | 4 | 0 | 3 | 2 | 1 | 0 | 0 | 0 | 2 | 15 | 0.04 |
| Cluster14732 Proteobac Betapr Burk Oxalobacteraceae         | 0 | 1 | 5 | 2 | 0 | 0 | 0 | 2 | 0 | 1 | 3 | 1 | 15 | 0.04 |
| Cluster16489;size=72                                        | 0 | 4 | 1 | 0 | 0 | 1 | 1 | 1 | 1 | 0 | 1 | 5 | 15 | 0.04 |
| Cluster24312 Bacteroid Sphing Sphir Chitinophagaceae        | 1 | 1 | 0 | 1 | 1 | 0 | 1 | 1 | 1 | 4 | 1 | 3 | 15 | 0.04 |
| Cluster25436 Proteobac Alphap Alphaproteok Rhizomicrobiu    | 2 | 0 | 3 | 1 | 0 | 2 | 1 | 0 | 1 | 4 | 0 | 1 | 15 | 0.04 |
| Cluster25477 Proteobac Alphap Alphaproteok Rhizomicrobiu    | 3 | 2 | 1 | 0 | 0 | 3 | 0 | 1 | 2 | 1 | 2 | 0 | 15 | 0.04 |
| Cluster42;size Proteobac Deltap Myxococcales                | 1 | 2 | 1 | 0 | 0 | 2 | 7 | 1 | 0 | 0 | 0 | 0 | 14 | 0.04 |
| Cluster60;size Acidobact Acidobacteria_Gp2 Gp2              | 1 | 3 | 1 | 3 | 1 | 2 | 0 | 1 | 0 | 0 | 1 | 1 | 14 | 0.04 |
| Cluster129;size Acidobact Acidobacteria_Gp3 Gp3             | 0 | 2 | 2 | 1 | 0 | 1 | 2 | 1 | 2 | 0 | 2 | 1 | 14 | 0.04 |
| Cluster615;size Acidobact Acidobacteria_Gp2 Gp2             | 0 | 0 | 0 | 2 | 0 | 3 | 2 | 0 | 1 | 1 | 5 | 0 | 14 | 0.04 |
| Cluster662;size Proteobac Alphap Alphaproteok Rhizomicrobiu | 7 | 2 | 1 | 0 | 1 | 0 | 2 | 0 | 1 | 0 | 0 | 0 | 14 | 0.04 |
| Cluster729;size Acidobact Acidobacteria_Gp1                 | 3 | 0 | 1 | 2 | 0 | 0 | 1 | 3 | 1 | 0 | 3 | 0 | 14 | 0.04 |
| Cluster771;size Proteobac Alphap Caulc Caulobacteraceae     | 2 | 0 | 2 | 1 | 2 | 0 | 0 | 0 | 1 | 5 | 0 | 1 | 14 | 0.04 |
| Cluster872;size Proteobac Alphap Rhod Acetobacteraceae      | 0 | 0 | 0 | 0 | 3 | 2 | 0 | 0 | 0 | 3 | 4 | 2 | 14 | 0.04 |
| Cluster1050; Proteobac Gamm Xantl Xanthomonadaceae          | 2 | 0 | 0 | 0 | 1 | 3 | 0 | 5 | 2 | 0 | 0 | 1 | 14 | 0.04 |
| Cluster1264;size=72                                         | 0 | 3 | 0 | 0 | 1 | 1 | 0 | 1 | 2 | 0 | 2 | 4 | 14 | 0.04 |
| Cluster1290; Actinobac Actinol Actinomycetales              | 1 | 0 | 1 | 0 | 3 | 0 | 2 | 3 | 2 | 1 | 1 | 0 | 14 | 0.04 |
| Cluster1394;size Acidobact Acidobacteria_Gp1                | 0 | 0 | 5 | 0 | 2 | 1 | 1 | 0 | 2 | 1 | 1 | 1 | 14 | 0.04 |
| Cluster1395; Proteobac Alphap Rhizobiales                   | 0 | 1 | 0 | 1 | 3 | 2 | 4 | 1 | 1 | 1 | 0 | 0 | 14 | 0.04 |
| Cluster1690; Verrucom Opitut; Opitu Opituta Opitutus        | 3 | 5 | 0 | 1 | 0 | 1 | 0 | 0 | 0 | 0 | 1 | 3 | 14 | 0.04 |
| Cluster2014; Proteobac Deltap Myxc Polyangiaceae            | 0 | 0 | 1 | 2 | 0 | 1 | 0 | 1 | 2 | 2 | 3 | 2 | 14 | 0.04 |
| Cluster2285; Proteobac Alphap Rhod Rhodospirillaceae        | 1 | 0 | 1 | 0 | 0 | 0 | 0 | 8 | 1 | 3 | 0 | 0 | 14 | 0.04 |
| Cluster2332; Actinobac Actinol Solirl Conexib Conexibacter  | 1 | 0 | 2 | 1 | 2 | 2 | 1 | 0 | 0 | 2 | 2 | 1 | 14 | 0.04 |
| Cluster2630; Actinobac Actinol Actinomycetales              | 0 | 0 | 4 | 0 | 2 | 0 | 0 | 0 | 0 | 5 | 3 | 0 | 14 | 0.04 |
| Cluster3093; Proteobac Alphap Rhizc Bradyrh Bradyrhizobiur  | 2 | 1 | 1 | 1 | 1 | 2 | 2 | 0 | 1 | 1 | 0 | 2 | 14 | 0.04 |
| Cluster3432; Proteobac Alphap Caulc Caulob; Phenylobacter   | 1 | 0 | 1 | 0 | 6 | 1 | 1 | 1 | 1 | 1 | 0 | 1 | 14 | 0.04 |
| Cluster4367; Verrucom Opitut; Opitu Opituta Opitutus        | 7 | 0 | 0 | 0 | 2 | 4 | 1 | 0 | 0 | 0 | 0 | 0 | 14 | 0.04 |
| Cluster4439; Proteobac Alphap Rhodospirillales              | 0 | 0 | 0 | 0 | 0 | 0 | 1 | 9 | 4 | 0 | 0 | 0 | 14 | 0.04 |
| Cluster4447; Proteobac Alphap Rhizobiales                   | 2 | 5 | 0 | 2 | 0 | 2 | 0 | 0 | 0 | 0 | 0 | 3 | 14 | 0.04 |

|                                                             |   |   |   |   |   |   |   |   |   |   |   |   |    |      |
|-------------------------------------------------------------|---|---|---|---|---|---|---|---|---|---|---|---|----|------|
| Cluster6273; Acidobact Acidobacteria_Gp1 Gp1                | 0 | 0 | 3 | 0 | 1 | 0 | 0 | 2 | 4 | 0 | 2 | 2 | 14 | 0.04 |
| Cluster8016; Acidobact Acidobacteria_Gp3                    | 1 | 0 | 0 | 0 | 0 | 1 | 1 | 1 | 5 | 2 | 3 | 0 | 14 | 0.04 |
| Cluster8902; Proteobac Alphap Rhod Rhodospirillaceae        | 1 | 0 | 0 | 0 | 0 | 6 | 4 | 1 | 1 | 0 | 0 | 1 | 14 | 0.04 |
| Cluster8939; Acidobact Acidobacteria_Gp1 Gp1                | 1 | 3 | 3 | 0 | 1 | 0 | 2 | 0 | 0 | 1 | 1 | 2 | 14 | 0.04 |
| Cluster9893; Acidobact Acidobacteria_Gp1 Gp1                | 1 | 0 | 1 | 1 | 0 | 4 | 3 | 3 | 1 | 0 | 0 | 0 | 14 | 0.04 |
| Cluster10530 Acidobact Acidobacteria_Gp2 Gp2                | 0 | 0 | 2 | 1 | 1 | 3 | 2 | 1 | 1 | 0 | 3 | 0 | 14 | 0.04 |
| Cluster11528 Proteobac Alphap Rhizobiales                   | 1 | 6 | 1 | 1 | 0 | 1 | 0 | 0 | 2 | 1 | 0 | 1 | 14 | 0.04 |
| Cluster11911 Acidobact Acidobacteria_Gp1                    | 1 | 1 | 1 | 0 | 1 | 0 | 1 | 2 | 2 | 0 | 0 | 5 | 14 | 0.04 |
| Cluster14863 Gemmatir Gemm Geml Gemma Gemmatimonas          | 3 | 0 | 0 | 2 | 5 | 0 | 2 | 0 | 0 | 1 | 1 | 0 | 14 | 0.04 |
| Cluster15746 Verrucom Opitut: Opitu Opituta Opitutus        | 0 | 3 | 1 | 1 | 1 | 1 | 0 | 0 | 1 | 2 | 0 | 4 | 14 | 0.04 |
| Cluster17189 Acidobact Acidobacteria_Gp10 Gp10              | 0 | 2 | 2 | 2 | 0 | 3 | 0 | 1 | 3 | 0 | 1 | 0 | 14 | 0.04 |
| Cluster18237 Acidobact Acidobacteria_Gp2 Gp2                | 0 | 0 | 0 | 4 | 1 | 0 | 1 | 4 | 3 | 0 | 1 | 0 | 14 | 0.04 |
| Cluster22477 Acidobact Acidobacteria_Gp6 Gp6                | 1 | 3 | 0 | 1 | 1 | 2 | 1 | 0 | 1 | 1 | 1 | 2 | 14 | 0.04 |
| Cluster23323 Proteobac Gammaproteobacteria                  | 0 | 0 | 0 | 0 | 2 | 3 | 3 | 5 | 1 | 0 | 0 | 0 | 14 | 0.04 |
| Cluster26908 Bacteroid Sphing Sphir Chitinophagaceae        | 3 | 0 | 1 | 0 | 0 | 1 | 0 | 7 | 1 | 0 | 1 | 0 | 14 | 0.04 |
| Cluster29065 Bacteroidetes                                  | 4 | 0 | 1 | 0 | 1 | 3 | 0 | 1 | 0 | 2 | 2 | 0 | 14 | 0.04 |
| Cluster24;size= Acidobact Acidobacteria_Gp2 Gp2             | 3 | 4 | 1 | 0 | 1 | 0 | 2 | 1 | 0 | 0 | 1 | 0 | 13 | 0.04 |
| Cluster108;size= Acidobact Acidobacteria_Gp1                | 4 | 1 | 1 | 0 | 0 | 1 | 0 | 0 | 0 | 6 | 0 | 0 | 13 | 0.04 |
| Cluster109;size= Proteobac Alphap Rhod Rhodospirillaceae    | 0 | 4 | 0 | 0 | 0 | 0 | 2 | 2 | 3 | 0 | 1 | 1 | 13 | 0.04 |
| Cluster132;size= Acidobact Acidobacteria_Gp3                | 2 | 0 | 0 | 0 | 1 | 2 | 2 | 1 | 1 | 2 | 0 | 2 | 13 | 0.04 |
| Cluster310;size=68                                          | 3 | 2 | 1 | 1 | 0 | 1 | 0 | 1 | 1 | 2 | 1 | 0 | 13 | 0.04 |
| Cluster332;size= Proteobac Deltap Myxc Polyangiaceae        | 0 | 1 | 1 | 1 | 3 | 0 | 1 | 1 | 0 | 2 | 2 | 1 | 13 | 0.04 |
| Cluster334;size= Actinobac Actinol Actinomycetales          | 1 | 2 | 2 | 0 | 1 | 0 | 0 | 0 | 2 | 2 | 2 | 1 | 13 | 0.04 |
| Cluster430;size= Acidobact Acidobacteria_Gp2 Gp2            | 2 | 3 | 0 | 0 | 1 | 3 | 1 | 0 | 1 | 0 | 1 | 1 | 13 | 0.04 |
| Cluster474;size=39                                          | 0 | 2 | 2 | 1 | 0 | 1 | 0 | 1 | 1 | 2 | 2 | 1 | 13 | 0.04 |
| Cluster647;size= Verrucom Opitut: Opitu Opituta Opitutus    | 3 | 1 | 0 | 0 | 0 | 0 | 1 | 0 | 0 | 7 | 0 | 1 | 13 | 0.04 |
| Cluster743;size= Acidobact Acidobacteria_Gp1 Acidobacteriur | 3 | 0 | 2 | 0 | 1 | 1 | 2 | 1 | 0 | 2 | 1 | 0 | 13 | 0.04 |
| Cluster926;size= Proteobac Alphap Rhodospirillales          | 2 | 0 | 0 | 0 | 0 | 0 | 2 | 0 | 0 | 5 | 4 | 0 | 13 | 0.04 |
| Cluster1015;size= Acidobact Acidobacteria_Gp3 Gp3           | 2 | 1 | 0 | 2 | 1 | 2 | 1 | 0 | 0 | 2 | 2 | 0 | 13 | 0.04 |

|                                                              |   |   |   |   |   |   |   |   |   |   |   |   |    |      |
|--------------------------------------------------------------|---|---|---|---|---|---|---|---|---|---|---|---|----|------|
| Cluster1117; Proteobac Gamm Xantl Sinobac Steroidobacter     | 1 | 2 | 0 | 0 | 2 | 1 | 0 | 1 | 0 | 6 | 0 | 0 | 13 | 0.04 |
| Cluster1966; Bacteroid Sphing Sphir Sphingo Mucilaginibact   | 2 | 2 | 2 | 1 | 1 | 0 | 1 | 2 | 0 | 0 | 2 | 0 | 13 | 0.04 |
| Cluster2106; Actinobac Actinobacteria                        | 1 | 4 | 0 | 0 | 3 | 0 | 0 | 1 | 1 | 1 | 0 | 2 | 13 | 0.04 |
| Cluster2485; Proteobac Alphap Rhod Acetobacteraceae          | 0 | 0 | 1 | 0 | 7 | 0 | 0 | 0 | 0 | 4 | 0 | 1 | 13 | 0.04 |
| Cluster3209; Actinobac Actinol Solirubrobacterales           | 1 | 2 | 1 | 0 | 0 | 1 | 1 | 0 | 0 | 1 | 5 | 1 | 13 | 0.04 |
| Cluster4605; Proteobac Alphap Rhod Acetobacteraceae          | 0 | 2 | 1 | 0 | 0 | 1 | 0 | 0 | 0 | 4 | 4 | 1 | 13 | 0.04 |
| Cluster4671; Proteobac Alphaproteobacteria                   | 1 | 0 | 0 | 0 | 1 | 2 | 4 | 2 | 2 | 0 | 1 | 0 | 13 | 0.04 |
| Cluster5013; Acidobact Acidobacteria_Gp3 Gp3                 | 0 | 3 | 0 | 0 | 0 | 3 | 1 | 1 | 1 | 0 | 2 | 2 | 13 | 0.04 |
| Cluster7181; Acidobact Acidobacteria_Gp1 Gp1                 | 0 | 0 | 0 | 0 | 0 | 0 | 0 | 7 | 6 | 0 | 0 | 0 | 13 | 0.04 |
| Cluster8481; Verrucom Opitut; Opitu Opituta Opitutus         | 4 | 0 | 1 | 0 | 0 | 1 | 0 | 0 | 0 | 5 | 2 | 0 | 13 | 0.04 |
| Cluster8883; Proteobac Alphap Rhodospirillales               | 1 | 4 | 0 | 0 | 0 | 0 | 2 | 3 | 0 | 0 | 0 | 3 | 13 | 0.04 |
| Cluster11417 Acidobact Acidobacteria_Gp1 Edaphobacter        | 1 | 0 | 1 | 2 | 2 | 2 | 1 | 1 | 0 | 2 | 1 | 0 | 13 | 0.04 |
| Cluster11840;size=57                                         | 2 | 1 | 1 | 3 | 0 | 2 | 1 | 1 | 0 | 0 | 1 | 1 | 13 | 0.04 |
| Cluster14832 Acidobact Acidobacteria_Gp1 Gp1                 | 0 | 2 | 0 | 4 | 0 | 0 | 1 | 2 | 0 | 0 | 1 | 3 | 13 | 0.04 |
| Cluster17238 Proteobac Deltaproteobacteria                   | 0 | 0 | 2 | 3 | 2 | 2 | 0 | 1 | 0 | 1 | 1 | 1 | 13 | 0.04 |
| Cluster18753 Acidobact Acidobacteria_Gp2 Gp2                 | 0 | 2 | 1 | 0 | 1 | 1 | 1 | 0 | 3 | 0 | 1 | 3 | 13 | 0.04 |
| Cluster19216 Acidobact Acidobacteria_Gp2 Gp2                 | 0 | 8 | 0 | 0 | 3 | 0 | 0 | 1 | 0 | 0 | 0 | 1 | 13 | 0.04 |
| Cluster20393 Proteobac Gamm Xantl Xanthor Rhodanobacte       | 6 | 1 | 0 | 0 | 1 | 1 | 4 | 0 | 0 | 0 | 0 | 0 | 13 | 0.04 |
| Cluster24902 Proteobac Alphap Caulc Caulobacteraceae         | 3 | 0 | 1 | 0 | 2 | 1 | 1 | 1 | 0 | 2 | 2 | 0 | 13 | 0.04 |
| Cluster24940 Actinobac Actinol Acidi Acidimii Aciditerrimona | 0 | 2 | 1 | 0 | 0 | 3 | 1 | 0 | 4 | 1 | 0 | 1 | 13 | 0.04 |
| Cluster191;si Proteobac Gamm Xantl Sinobac Steroidobacter    | 2 | 0 | 1 | 0 | 0 | 1 | 0 | 1 | 2 | 4 | 1 | 0 | 12 | 0.03 |
| Cluster494;si Acidobact Acidobacteria_Gp1 Gp1                | 2 | 4 | 0 | 0 | 1 | 0 | 0 | 1 | 4 | 0 | 0 | 0 | 12 | 0.03 |
| Cluster669;si Proteobac Alphap Rhod Acetobac Acidisphaera    | 1 | 0 | 1 | 0 | 2 | 0 | 0 | 0 | 1 | 4 | 3 | 0 | 12 | 0.03 |
| Cluster690;si Proteobac Gammaproteobacteria                  | 3 | 2 | 0 | 0 | 3 | 0 | 0 | 0 | 2 | 1 | 1 | 0 | 12 | 0.03 |
| Cluster817;si Acidobact Acidobacteria_Gp2 Gp2                | 1 | 2 | 0 | 2 | 1 | 0 | 0 | 1 | 1 | 2 | 1 | 1 | 12 | 0.03 |
| Cluster938;si Proteobacteria                                 | 6 | 0 | 0 | 0 | 5 | 0 | 0 | 0 | 1 | 0 | 0 | 0 | 12 | 0.03 |
| Cluster998;si Acidobact Acidobacteria_Gp2 Gp2                | 2 | 3 | 1 | 3 | 1 | 0 | 0 | 2 | 0 | 0 | 0 | 0 | 12 | 0.03 |
| Cluster1129;size=60                                          | 1 | 0 | 4 | 2 | 0 | 2 | 1 | 1 | 0 | 0 | 0 | 1 | 12 | 0.03 |
| Cluster1217; Proteobac Alphaproteobacteria                   | 0 | 1 | 0 | 1 | 3 | 1 | 1 | 1 | 2 | 2 | 0 | 0 | 12 | 0.03 |



|                                                                |   |   |   |   |   |   |   |   |   |   |   |   |    |
|----------------------------------------------------------------|---|---|---|---|---|---|---|---|---|---|---|---|----|
| Cluster18758; Acidobact Acidobacteria_Gp2 Gp2                  | 1 | 1 | 1 | 3 | 2 | 2 | 0 | 1 | 0 | 0 | 1 | 0 | 12 |
| Cluster22039; Proteobac Alphap Rhod Acetobac Acidisphaera      | 1 | 0 | 3 | 0 | 0 | 2 | 2 | 0 | 0 | 2 | 2 | 0 | 12 |
| Cluster23040; Proteobac Gammaproteobacteria                    | 0 | 0 | 2 | 0 | 0 | 0 | 1 | 1 | 2 | 0 | 0 | 6 | 12 |
| Cluster27818; Bacteroid Sphing Sphir Chitinophagaceae          | 0 | 5 | 1 | 0 | 0 | 4 | 0 | 0 | 1 | 0 | 0 | 1 | 12 |
| Cluster28173; Acidobact Acidobacteria_Gp2 Gp2                  | 0 | 0 | 1 | 0 | 0 | 1 | 2 | 4 | 4 | 0 | 0 | 0 | 12 |
| Cluster31;size= Chlamydi: Chlamy Chlar Parachlamydiaceae       | 0 | 0 | 0 | 0 | 0 | 0 | 0 | 6 | 4 | 0 | 1 | 0 | 11 |
| Cluster127;size= Acidobact Acidobacteria_Gp3 Gp3               | 0 | 0 | 1 | 2 | 1 | 0 | 0 | 0 | 0 | 6 | 1 | 0 | 11 |
| Cluster137;size= Acidobact Acidobacteria_Gp2 Gp2               | 1 | 0 | 1 | 0 | 0 | 0 | 2 | 1 | 1 | 3 | 1 | 1 | 11 |
| Cluster166;size= Acidobact Acidobacteria_Gp1                   | 0 | 2 | 0 | 0 | 0 | 0 | 3 | 2 | 2 | 0 | 1 | 1 | 11 |
| Cluster223;size=117                                            | 2 | 0 | 1 | 1 | 0 | 1 | 2 | 1 | 1 | 0 | 1 | 1 | 11 |
| Cluster284;size=30                                             | 2 | 0 | 2 | 2 | 1 | 0 | 0 | 2 | 1 | 1 | 0 | 0 | 11 |
| Cluster373;size= Firmicutes                                    | 0 | 4 | 0 | 0 | 0 | 0 | 1 | 0 | 2 | 0 | 2 | 2 | 11 |
| Cluster601;size= Proteobac Gammaproteobacteria                 | 1 | 0 | 0 | 0 | 1 | 3 | 2 | 1 | 0 | 0 | 0 | 3 | 11 |
| Cluster659;size= Proteobac Deltap Myxococcales                 | 2 | 0 | 0 | 0 | 5 | 1 | 2 | 0 | 0 | 1 | 0 | 0 | 11 |
| Cluster786;size=52                                             | 2 | 2 | 1 | 2 | 1 | 1 | 0 | 0 | 0 | 0 | 0 | 2 | 11 |
| Cluster846;size=77                                             | 0 | 0 | 2 | 4 | 0 | 0 | 0 | 0 | 0 | 4 | 1 | 0 | 11 |
| Cluster877;size= Proteobac Deltap Myxococcales                 | 1 | 1 | 3 | 1 | 0 | 0 | 0 | 1 | 2 | 0 | 0 | 2 | 11 |
| Cluster923;size= Proteobac Alphap Rhizc Bradyrh Bradyrhizobiur | 0 | 0 | 0 | 2 | 1 | 2 | 0 | 1 | 1 | 1 | 2 | 1 | 11 |
| Cluster967;size= Proteobac Alphap Rhizobiales                  | 0 | 1 | 1 | 0 | 1 | 0 | 2 | 2 | 2 | 0 | 0 | 2 | 11 |
| Cluster994;size= Acidobact Acidobacteria_Gp1 Edaphobacter      | 5 | 0 | 0 | 0 | 1 | 1 | 1 | 0 | 0 | 3 | 0 | 0 | 11 |
| Cluster1069;size= Proteobac Alphap Rhod Rhodospirillaceae      | 0 | 0 | 4 | 0 | 2 | 1 | 0 | 1 | 2 | 0 | 1 | 0 | 11 |
| Cluster1487;size= Acidobact Acidobacteria_Gp2 Gp2              | 2 | 1 | 0 | 1 | 1 | 1 | 1 | 1 | 0 | 0 | 2 | 1 | 11 |
| Cluster1550;size= Acidobact Acidobacteria_Gp2 Gp2              | 0 | 0 | 0 | 0 | 0 | 0 | 0 | 3 | 5 | 0 | 0 | 3 | 11 |
| Cluster1902;size= Proteobac Gamm Xantl Xanthomonadaceae        | 1 | 0 | 0 | 0 | 1 | 4 | 2 | 2 | 1 | 0 | 0 | 0 | 11 |
| Cluster1910;size= Proteobac Alphap Rhizc Xanthol Labrys        | 0 | 3 | 0 | 1 | 1 | 0 | 1 | 1 | 0 | 3 | 1 | 0 | 11 |
| Cluster1954;size= Acidobact Acidobacteria_Gp2 Gp2              | 0 | 2 | 0 | 1 | 3 | 0 | 1 | 2 | 0 | 0 | 0 | 2 | 11 |
| Cluster1987;size= Proteobac Alphap Rhod Acetobacteraceae       | 1 | 0 | 3 | 0 | 2 | 0 | 0 | 0 | 0 | 3 | 2 | 0 | 11 |
| Cluster2001;size= Actinobac Actinol Actinomycetales            | 0 | 0 | 0 | 2 | 1 | 0 | 0 | 1 | 2 | 2 | 3 | 0 | 11 |
| Cluster2080;size= Acidobact Acidobacteria_Gp2 Gp2              | 0 | 0 | 0 | 0 | 1 | 0 | 0 | 0 | 0 | 7 | 3 | 0 | 11 |



|                                                            |   |   |   |   |   |   |   |   |   |   |   |   |    |
|------------------------------------------------------------|---|---|---|---|---|---|---|---|---|---|---|---|----|
| Cluster2188; Acidobact Acidobacteria_Gp2 Gp2               | 4 | 0 | 1 | 0 | 0 | 1 | 0 | 0 | 3 | 2 | 0 | 0 | 11 |
| Cluster2225; Acidobact Acidobacteria_Gp3                   | 0 | 3 | 0 | 1 | 0 | 3 | 1 | 0 | 1 | 0 | 0 | 2 | 11 |
| Cluster2258; Acidobact Acidobacteria_Gp3 Gp3               | 1 | 2 | 0 | 0 | 0 | 1 | 3 | 0 | 2 | 0 | 2 | 0 | 11 |
| Cluster2484; Bacteroid Sphing Sphir Chitinophagaceae       | 0 | 0 | 1 | 1 | 1 | 0 | 0 | 0 | 0 | 6 | 2 | 0 | 11 |
| Cluster2655; Acidobact Acidobacteria_Gp6 Gp6               | 1 | 1 | 0 | 1 | 1 | 1 | 1 | 1 | 0 | 0 | 1 | 3 | 11 |
| Cluster2715; Proteobac Alphap Rhizobiales                  | 1 | 5 | 0 | 0 | 0 | 3 | 0 | 0 | 2 | 0 | 0 | 0 | 11 |
| Cluster2791; Acidobact Acidobacteria_Gp1                   | 2 | 2 | 1 | 0 | 2 | 0 | 2 | 0 | 0 | 1 | 1 | 0 | 11 |
| Cluster2889; Planctom Planct Planct Planctomycetaceae      | 0 | 0 | 1 | 2 | 0 | 0 | 4 | 1 | 0 | 0 | 2 | 1 | 11 |
| Cluster2903; Actinobac Actinol Acidimicrobiales            | 0 | 4 | 0 | 1 | 0 | 1 | 0 | 0 | 2 | 0 | 1 | 2 | 11 |
| Cluster3021;size=54                                        | 1 | 2 | 1 | 0 | 0 | 0 | 1 | 0 | 2 | 1 | 2 | 1 | 11 |
| Cluster3129; Acidobact Acidobacteria_Gp2 Gp2               | 0 | 3 | 0 | 1 | 0 | 0 | 2 | 1 | 1 | 0 | 1 | 2 | 11 |
| Cluster3403; Bacteroid Sphing Sphir Chitinophagaceae       | 0 | 0 | 2 | 1 | 0 | 2 | 2 | 1 | 1 | 2 | 0 | 0 | 11 |
| Cluster4065;size=40                                        | 0 | 1 | 0 | 0 | 2 | 1 | 0 | 0 | 3 | 2 | 0 | 2 | 11 |
| Cluster4224; Proteobac Alphap Rhodospirillales             | 4 | 2 | 1 | 1 | 0 | 0 | 0 | 1 | 0 | 0 | 1 | 1 | 11 |
| Cluster7614; Acidobact Acidobacteria_Gp1 Edaphobacter      | 0 | 1 | 0 | 2 | 0 | 0 | 0 | 1 | 3 | 0 | 4 | 0 | 11 |
| Cluster10025 Acidobact Acidobacteria_Gp1 Gp1               | 0 | 0 | 1 | 2 | 0 | 0 | 0 | 3 | 4 | 0 | 0 | 1 | 11 |
| Cluster10245 Actinobac Actinol Solirubrobacterales         | 2 | 1 | 3 | 0 | 0 | 1 | 1 | 0 | 0 | 1 | 2 | 0 | 11 |
| Cluster13415 Proteobac Alphap Rhizc Bradyrh Bradyrhizobiur | 2 | 3 | 0 | 0 | 1 | 0 | 1 | 2 | 0 | 0 | 0 | 2 | 11 |
| Cluster13572 Proteobac Betapr Burkholderia                 | 1 | 0 | 1 | 0 | 0 | 2 | 1 | 1 | 1 | 1 | 1 | 2 | 11 |
| Cluster14058 Acidobact Acidobacteria_Gp1 Gp1               | 0 | 2 | 1 | 0 | 0 | 1 | 1 | 2 | 3 | 0 | 1 | 0 | 11 |
| Cluster15595 Proteobac Betapr Burkholderiales              | 0 | 1 | 0 | 0 | 0 | 2 | 1 | 4 | 0 | 2 | 1 | 0 | 11 |
| Cluster16065 Acidobact Acidobacteria_Gp1 Gp1               | 0 | 0 | 1 | 1 | 1 | 1 | 0 | 1 | 2 | 2 | 1 | 1 | 11 |
| Cluster16433 Acidobact Acidobacteria_Gp1 Acidobacteriur    | 0 | 0 | 4 | 0 | 2 | 0 | 1 | 0 | 0 | 3 | 1 | 0 | 11 |
| Cluster17536;size=74                                       | 0 | 0 | 2 | 2 | 0 | 3 | 0 | 0 | 0 | 0 | 1 | 3 | 11 |
| Cluster18132 Acidobact Acidobacteria_Gp2 Gp2               | 2 | 0 | 0 | 0 | 0 | 0 | 0 | 0 | 1 | 4 | 4 | 0 | 11 |
| Cluster20335;size=63                                       | 2 | 1 | 0 | 1 | 0 | 1 | 3 | 0 | 0 | 0 | 1 | 2 | 11 |
| Cluster22522 Proteobac Alphap Rhod Acetobz Acidisphaera    | 1 | 0 | 2 | 0 | 0 | 3 | 0 | 0 | 0 | 3 | 2 | 0 | 11 |
| Cluster25468 Proteobac Alphap Caulc Caulobz Caulobacter    | 4 | 0 | 1 | 1 | 0 | 1 | 1 | 0 | 0 | 0 | 3 | 0 | 11 |
| Cluster46;size Gemmatir Gemm Gemm Gemma Gemmatimonz        | 0 | 2 | 2 | 1 | 0 | 1 | 0 | 0 | 0 | 1 | 3 | 0 | 10 |

|                     |                 |                     |                     |                  |                  |   |   |   |   |   |   |   |   |   |   |   |   |    |
|---------------------|-----------------|---------------------|---------------------|------------------|------------------|---|---|---|---|---|---|---|---|---|---|---|---|----|
| Cluster62;size=47   | Proteobac       | Betapr              | Burkl               | Burkhol          | Burkholderia     | 4 | 1 | 0 | 0 | 1 | 1 | 0 | 2 | 0 | 1 | 0 | 0 | 10 |
| Cluster141;size=47  | Proteobac       | Deltap              | Myxc                | Cystobacteraceae |                  | 1 | 0 | 2 | 2 | 0 | 1 | 1 | 1 | 1 | 0 | 0 | 1 | 10 |
| Cluster316;size=47  | Proteobac       | Alphaproteobacteria |                     |                  |                  | 0 | 0 | 0 | 0 | 2 | 1 | 0 | 2 | 3 | 2 | 0 | 0 | 10 |
| Cluster327;size=47  | Acidobact       | Acidobacteria_Gp3   |                     |                  |                  | 1 | 1 | 1 | 0 | 1 | 1 | 0 | 0 | 0 | 4 | 1 | 0 | 10 |
| Cluster514;size=47  | Acidobact       | Acidobacteria_Gp3   | Gp3                 |                  |                  | 1 | 0 | 1 | 3 | 0 | 0 | 0 | 1 | 4 | 0 | 0 | 0 | 10 |
| Cluster552;size=47  |                 |                     |                     |                  |                  | 0 | 1 | 0 | 0 | 0 | 1 | 1 | 1 | 2 | 0 | 0 | 4 | 10 |
| Cluster633;size=47  | Armatimonadetes |                     | Armatimonade        |                  |                  | 0 | 1 | 2 | 0 | 0 | 1 | 2 | 1 | 1 | 0 | 1 | 1 | 10 |
| Cluster641;size=47  | Proteobac       | Deltap              | Myxc                | Cystobacteraceae |                  | 2 | 1 | 1 | 0 | 1 | 1 | 1 | 0 | 2 | 0 | 0 | 1 | 10 |
| Cluster670;size=47  | Proteobac       | Gammaproteobacteria |                     |                  |                  | 3 | 0 | 2 | 0 | 1 | 1 | 0 | 1 | 0 | 0 | 1 | 1 | 10 |
| Cluster705;size=47  | Acidobact       | Acidobacteria_Gp1   |                     |                  |                  | 3 | 0 | 1 | 0 | 1 | 0 | 0 | 0 | 1 | 4 | 0 | 0 | 10 |
| Cluster918;size=47  | Armatimonadetes | Chthor              | Chtho               | Chthono          | Chthonomonadales | 0 | 1 | 1 | 1 | 1 | 0 | 1 | 0 | 0 | 3 | 1 | 1 | 10 |
| Cluster1007;size=47 | Acidobact       | Acidobacteria_Gp5   | Gp5                 |                  |                  | 1 | 2 | 2 | 1 | 0 | 0 | 0 | 1 | 0 | 3 | 0 | 0 | 10 |
| Cluster1208;size=47 | Acidobact       | Acidobacteria_Gp1   | Gp1                 |                  |                  | 0 | 1 | 0 | 0 | 3 | 0 | 1 | 0 | 1 | 3 | 1 | 0 | 10 |
| Cluster1218;size=47 | Proteobac       | Alphap              | Rhodospirillales    |                  |                  | 1 | 3 | 0 | 1 | 1 | 1 | 0 | 0 | 0 | 0 | 1 | 2 | 10 |
| Cluster1466;size=47 | Acidobact       | Acidobacteria_Gp1   | Gp1                 |                  |                  | 2 | 0 | 0 | 0 | 2 | 3 | 0 | 1 | 1 | 0 | 0 | 1 | 10 |
| Cluster1477;size=47 | Actinobac       | Actinol             | Solirubrobacterales | Conexib          | Conexibacter     | 0 | 0 | 2 | 1 | 0 | 0 | 1 | 0 | 1 | 4 | 1 | 0 | 10 |
| Cluster1547;size=47 | Acidobact       | Acidobacteria_Gp2   | Gp2                 |                  |                  | 1 | 1 | 2 | 0 | 0 | 3 | 1 | 0 | 0 | 0 | 0 | 2 | 10 |
| Cluster1716;size=47 | Bacteroid       | Sphing              | Sphir               | Chitinophagaceae |                  | 1 | 1 | 1 | 0 | 1 | 2 | 0 | 0 | 1 | 1 | 1 | 1 | 10 |
| Cluster1791;size=47 | Actinobac       | Actinol             | Solirubrobacterales |                  |                  | 0 | 1 | 1 | 0 | 1 | 0 | 1 | 1 | 1 | 1 | 1 | 2 | 10 |
| Cluster1813;size=47 | Bacteroid       | Sphing              | Sphir               | Chitinophagaceae |                  | 0 | 1 | 0 | 0 | 1 | 1 | 1 | 1 | 0 | 2 | 3 | 0 | 10 |
| Cluster1879;size=37 |                 |                     |                     |                  |                  | 1 | 0 | 1 | 0 | 2 | 0 | 2 | 1 | 0 | 0 | 2 | 1 | 10 |
| Cluster1896;size=37 | Acidobact       | Acidobacteria_Gp2   | Gp2                 |                  |                  | 0 | 1 | 1 | 3 | 1 | 0 | 1 | 2 | 1 | 0 | 0 | 0 | 10 |
| Cluster2005;size=37 | Acidobact       | Acidobacteria_Gp3   | Gp3                 |                  |                  | 0 | 0 | 1 | 1 | 0 | 1 | 1 | 4 | 0 | 0 | 1 | 1 | 10 |
| Cluster2062;size=37 | Acidobact       | Acidobacteria_Gp1   |                     |                  |                  | 0 | 0 | 0 | 0 | 1 | 0 | 0 | 0 | 0 | 0 | 0 | 9 | 10 |
| Cluster2090;size=37 | Proteobac       | Alphap              | Rhizc               | Methylocystaceae |                  | 0 | 0 | 1 | 2 | 1 | 0 | 1 | 1 | 0 | 3 | 1 | 0 | 10 |
| Cluster2116;size=37 | Acidobact       | Acidobacteria_Gp2   | Gp2                 |                  |                  | 1 | 2 | 1 | 0 | 1 | 0 | 0 | 1 | 4 | 0 | 0 | 0 | 10 |
| Cluster2172;size=37 | Bacteroid       | Sphing              | Sphingobacteriales  |                  |                  | 2 | 0 | 0 | 0 | 3 | 1 | 0 | 0 | 0 | 2 | 0 | 2 | 10 |
| Cluster2239;size=51 |                 |                     |                     |                  |                  | 5 | 1 | 0 | 0 | 0 | 0 | 0 | 0 | 2 | 1 | 1 | 0 | 10 |
| Cluster2249;size=51 | TM7             |                     |                     | TM7_genera_i     |                  | 0 | 2 | 0 | 0 | 0 | 0 | 1 | 0 | 2 | 0 | 5 | 0 | 10 |

|                                                             |   |   |   |   |   |   |   |   |   |   |   |   |    |
|-------------------------------------------------------------|---|---|---|---|---|---|---|---|---|---|---|---|----|
| Cluster2615; Proteobac Alphap Rhodospirillales              | 0 | 1 | 1 | 2 | 3 | 0 | 1 | 0 | 1 | 0 | 0 | 1 | 10 |
| Cluster2689; Acidobact Acidobacteria_Gp1                    | 2 | 0 | 3 | 0 | 0 | 1 | 1 | 0 | 1 | 1 | 0 | 1 | 10 |
| Cluster2912; Bacteroid Sphing Sphir Chitinophagaceae        | 1 | 0 | 3 | 1 | 3 | 0 | 0 | 0 | 0 | 2 | 0 | 0 | 10 |
| Cluster2972; Verrucom Opitut; Opitu Opituta Opitutus        | 0 | 0 | 0 | 0 | 0 | 0 | 0 | 0 | 1 | 9 | 0 | 0 | 10 |
| Cluster3008; Proteobac Gamm Legio Coxiella Aquicella        | 1 | 2 | 1 | 0 | 2 | 0 | 3 | 1 | 0 | 0 | 0 | 0 | 10 |
| Cluster3282;size=61                                         | 0 | 2 | 1 | 0 | 0 | 2 | 1 | 3 | 1 | 0 | 0 | 0 | 10 |
| Cluster3388; Proteobac Alphap Rhizobiales                   | 0 | 1 | 2 | 0 | 0 | 1 | 1 | 1 | 0 | 0 | 3 | 1 | 10 |
| Cluster3837; Acidobact Acidobacteria_Gp3 Bryobacter         | 1 | 1 | 0 | 0 | 2 | 1 | 1 | 0 | 1 | 1 | 1 | 1 | 10 |
| Cluster4569;size=35                                         | 3 | 3 | 0 | 0 | 1 | 2 | 0 | 0 | 0 | 0 | 1 | 0 | 10 |
| Cluster4598; Acidobact Acidobacteria_Gp3 Gp3                | 4 | 0 | 0 | 0 | 5 | 1 | 0 | 0 | 0 | 0 | 0 | 0 | 10 |
| Cluster4884; Proteobac Alphap Rhizc Methylocystaceae        | 1 | 1 | 1 | 0 | 1 | 1 | 2 | 1 | 1 | 1 | 0 | 0 | 10 |
| Cluster5036; Proteobac Deltap Myxococcales                  | 2 | 1 | 1 | 0 | 0 | 1 | 1 | 0 | 1 | 1 | 1 | 1 | 10 |
| Cluster5159; Acidobact Acidobacteria_Gp1                    | 0 | 1 | 2 | 1 | 3 | 0 | 1 | 0 | 0 | 2 | 0 | 0 | 10 |
| Cluster6615; Acidobact Acidobacteria_Gp3 Gp3                | 1 | 0 | 0 | 1 | 3 | 0 | 0 | 0 | 1 | 1 | 3 | 0 | 10 |
| Cluster7107; Acidobact Acidobacteria_Gp1                    | 3 | 0 | 2 | 0 | 0 | 1 | 0 | 1 | 2 | 1 | 0 | 0 | 10 |
| Cluster7304; Proteobac Alphap Rhodospirillales              | 0 | 3 | 0 | 0 | 0 | 0 | 1 | 0 | 3 | 0 | 2 | 1 | 10 |
| Cluster7774; Proteobac Alphap Rhizc Bradyrh Bradyrhizobiur  | 1 | 1 | 0 | 1 | 0 | 0 | 2 | 1 | 2 | 0 | 2 | 0 | 10 |
| Cluster10675 Proteobac Alphap Caulc Caulobacteraceae        | 1 | 0 | 4 | 1 | 0 | 2 | 1 | 0 | 0 | 1 | 0 | 0 | 10 |
| Cluster11632 Acidobact Acidobacteria_Gp3 Gp3                | 1 | 2 | 1 | 0 | 2 | 0 | 0 | 1 | 1 | 0 | 0 | 2 | 10 |
| Cluster15735 Actinobac Actinol Acidimicrobiales             | 0 | 0 | 1 | 1 | 3 | 0 | 0 | 1 | 2 | 0 | 1 | 1 | 10 |
| Cluster15789 Acidobact Acidobacteria_Gp2 Gp2                | 0 | 3 | 0 | 1 | 1 | 0 | 1 | 0 | 0 | 0 | 2 | 2 | 10 |
| Cluster15991 Acidobact Acidobacteria_Gp1 Gp1                | 1 | 0 | 1 | 0 | 2 | 4 | 0 | 0 | 0 | 1 | 1 | 0 | 10 |
| Cluster17034 Actinobac Actinol Acidi Acidimi Aciditerrimona | 0 | 0 | 3 | 1 | 2 | 3 | 0 | 0 | 0 | 0 | 0 | 1 | 10 |
| Cluster18192 Proteobac Alphap Rhod Acetobacteraceae         | 0 | 0 | 0 | 0 | 1 | 0 | 0 | 0 | 0 | 6 | 3 | 0 | 10 |
| Cluster19409 Acidobact Acidobacteria_Gp2 Gp2                | 0 | 3 | 1 | 1 | 0 | 1 | 2 | 2 | 0 | 0 | 0 | 0 | 10 |
| Cluster22029 Proteobac Gammaproteobacteria                  | 2 | 0 | 1 | 0 | 0 | 0 | 0 | 0 | 0 | 6 | 1 | 0 | 10 |
| Cluster22327 Proteobac Gamm Xantf Sinobac Nevskia           | 2 | 0 | 0 | 0 | 1 | 3 | 0 | 1 | 0 | 0 | 0 | 3 | 10 |
| Cluster22388 Proteobac Gamm Xantf Sinobacteraceae           | 0 | 1 | 0 | 0 | 1 | 0 | 3 | 0 | 1 | 0 | 1 | 3 | 10 |
| Cluster22691 Actinobac Actinol Acidi Acidimi Aciditerrimona | 1 | 0 | 0 | 1 | 1 | 2 | 0 | 0 | 0 | 0 | 2 | 3 | 10 |

|                                                                   |   |   |   |   |   |   |   |   |   |   |   |   |    |
|-------------------------------------------------------------------|---|---|---|---|---|---|---|---|---|---|---|---|----|
| Cluster22996; Actinobac Actinol Actinomycetales                   | 2 | 0 | 1 | 0 | 1 | 0 | 2 | 0 | 2 | 0 | 1 | 1 | 10 |
| Cluster23244; Actinobac Actinol Actin Mycoba Mycobacteriur        | 0 | 0 | 0 | 0 | 1 | 0 | 2 | 3 | 1 | 3 | 0 | 0 | 10 |
| Cluster26135; Proteobac Alphap Caulc Cauloba Phenylbacter         | 2 | 0 | 0 | 0 | 3 | 1 | 2 | 0 | 1 | 0 | 1 | 0 | 10 |
| Cluster28;size= Proteobac Betapr Burkl Oxalobacteraceae           | 1 | 0 | 0 | 0 | 0 | 0 | 2 | 2 | 0 | 3 | 1 | 0 | 9  |
| Cluster40;size= Proteobac Gamm Xantl Xanthomonadaceae             | 1 | 0 | 0 | 0 | 1 | 3 | 0 | 0 | 2 | 2 | 0 | 0 | 9  |
| Cluster221;size= Acidobact Acidobacteria_Gp2 Gp2                  | 4 | 0 | 1 | 0 | 1 | 0 | 0 | 0 | 0 | 1 | 2 | 0 | 9  |
| Cluster272;size=31                                                | 0 | 2 | 0 | 0 | 0 | 0 | 1 | 1 | 0 | 3 | 0 | 2 | 9  |
| Cluster312;size= Proteobac Alphaproteobacteria                    | 2 | 2 | 0 | 0 | 1 | 0 | 1 | 1 | 0 | 1 | 0 | 1 | 9  |
| Cluster589;size= Proteobac Alphap Rhodospirillales                | 4 | 0 | 0 | 0 | 0 | 1 | 2 | 0 | 1 | 0 | 1 | 0 | 9  |
| Cluster649;size= Proteobac Alphap Rhod Acetoba Acidocella         | 1 | 0 | 1 | 1 | 0 | 0 | 0 | 0 | 0 | 4 | 2 | 0 | 9  |
| Cluster714;size= Acidobact Acidobacteria_Gp3 Gp3                  | 0 | 1 | 0 | 1 | 0 | 0 | 0 | 2 | 0 | 1 | 1 | 3 | 9  |
| Cluster875;size= Acidobact Acidobacteria_Gp1                      | 2 | 0 | 1 | 0 | 1 | 0 | 0 | 1 | 2 | 0 | 1 | 1 | 9  |
| Cluster934;size= Acidobact Acidobacteria_Gp5 Gp5                  | 0 | 2 | 1 | 0 | 1 | 0 | 2 | 0 | 2 | 0 | 0 | 1 | 9  |
| Cluster1021;size= Proteobac Alphap Rhodospirillales               | 0 | 2 | 0 | 0 | 0 | 1 | 1 | 3 | 0 | 0 | 0 | 2 | 9  |
| Cluster1119;size= Proteobac Gamm Pseu Pseudo Pseudomonas          | 0 | 1 | 1 | 1 | 0 | 2 | 1 | 0 | 0 | 0 | 3 | 0 | 9  |
| Cluster1191;size= Actinobac Actinobacteria                        | 1 | 0 | 1 | 0 | 2 | 1 | 2 | 1 | 0 | 0 | 1 | 0 | 9  |
| Cluster1266;size= Proteobac Alphap Rhizobiales                    | 0 | 1 | 0 | 2 | 1 | 0 | 1 | 0 | 1 | 1 | 1 | 1 | 9  |
| Cluster1631;size= Proteobac Alphap Caulc Cauloba Phenylbacter     | 3 | 0 | 0 | 0 | 1 | 2 | 0 | 0 | 0 | 1 | 2 | 0 | 9  |
| Cluster1663;size= Acidobact Acidobacteria_Gp2 Gp2                 | 0 | 0 | 2 | 3 | 1 | 0 | 0 | 2 | 0 | 0 | 1 | 0 | 9  |
| Cluster1715;size= Bacteroid Sphing Sphir Chitinophagaceae         | 1 | 0 | 1 | 1 | 0 | 1 | 1 | 1 | 1 | 1 | 1 | 0 | 9  |
| Cluster2281;size= Chloroflex Ktedor Ktedo Ktedon Ktedonobacter    | 0 | 0 | 0 | 0 | 6 | 0 | 0 | 0 | 1 | 1 | 1 | 0 | 9  |
| Cluster2443;size= Acidobact Acidobacteria_Gp2 Gp2                 | 3 | 0 | 0 | 2 | 2 | 0 | 0 | 1 | 0 | 0 | 1 | 0 | 9  |
| Cluster2777;size= Acidobact Acidobacteria_Gp13 Gp13               | 1 | 1 | 0 | 0 | 1 | 1 | 1 | 1 | 1 | 2 | 0 | 0 | 9  |
| Cluster2865;size= Bacteroidetes                                   | 0 | 1 | 0 | 0 | 1 | 0 | 2 | 0 | 1 | 4 | 0 | 0 | 9  |
| Cluster2876;size= Proteobac Betapr Burkl Comamonadaceae           | 1 | 0 | 0 | 0 | 0 | 3 | 0 | 3 | 0 | 0 | 2 | 0 | 9  |
| Cluster2935;size= Proteobac Alphap Rhizc Bradyrh Agromonas        | 1 | 0 | 2 | 0 | 0 | 0 | 0 | 1 | 1 | 2 | 2 | 0 | 9  |
| Cluster3091;size= Bacteroid Sphing Sphir Chitinophagaceae         | 1 | 0 | 0 | 2 | 0 | 3 | 0 | 0 | 0 | 0 | 0 | 3 | 9  |
| Cluster3136;size= Actinobac Actinol Acidi Acidimii Aciditerrimona | 1 | 1 | 1 | 1 | 2 | 1 | 0 | 0 | 1 | 1 | 0 | 0 | 9  |
| Cluster3350;size= Acidobact Acidobacteria_Gp13 Gp13               | 0 | 2 | 0 | 1 | 1 | 1 | 1 | 1 | 0 | 0 | 2 | 0 | 9  |

|                                                            |   |   |   |   |   |   |   |   |   |   |   |   |   |
|------------------------------------------------------------|---|---|---|---|---|---|---|---|---|---|---|---|---|
| Cluster3501; Acidobact Acidobacteria_Gp3 Gp3               | 0 | 1 | 0 | 0 | 0 | 1 | 1 | 3 | 1 | 0 | 1 | 1 | 9 |
| Cluster3726; Planctom Planct Planct Plancto Singulisphaera | 0 | 1 | 2 | 0 | 3 | 0 | 0 | 2 | 0 | 0 | 1 | 0 | 9 |
| Cluster3935; Proteobac Alphap Rhizc Beijerinckiaaceae      | 0 | 3 | 0 | 1 | 0 | 0 | 1 | 1 | 1 | 0 | 0 | 2 | 9 |
| Cluster4383;size=40                                        | 1 | 1 | 0 | 1 | 1 | 0 | 1 | 2 | 1 | 0 | 1 | 0 | 9 |
| Cluster4483; Acidobact Acidobacteria_Gp1                   | 2 | 0 | 1 | 0 | 0 | 0 | 0 | 1 | 2 | 0 | 2 | 1 | 9 |
| Cluster4917; Acidobact Acidobacteria_Gp2 Gp2               | 0 | 0 | 0 | 1 | 0 | 0 | 0 | 1 | 4 | 3 | 0 | 0 | 9 |
| Cluster5404; Acidobact Acidobacteria_Gp2 Gp2               | 0 | 0 | 1 | 2 | 0 | 0 | 2 | 0 | 1 | 0 | 1 | 2 | 9 |
| Cluster8344; Bacteroid Sphing Sphir Chitinophagaceae       | 1 | 0 | 0 | 0 | 0 | 0 | 1 | 1 | 0 | 4 | 2 | 0 | 9 |
| Cluster8845; Acidobact Acidobacteria_Gp2 Gp2               | 0 | 1 | 0 | 3 | 0 | 1 | 0 | 3 | 0 | 0 | 1 | 0 | 9 |
| Cluster10345 Proteobac Alphap Rhizc Xantho Pseudolabrys    | 0 | 0 | 0 | 1 | 1 | 0 | 0 | 1 | 2 | 0 | 2 | 2 | 9 |
| Cluster11684 Acidobact Acidobacteria_Gp3 Gp3               | 0 | 0 | 1 | 0 | 0 | 0 | 0 | 2 | 1 | 1 | 3 | 1 | 9 |
| Cluster12253 Proteobac Gamm Xantl Xanthor Frateuria        | 0 | 0 | 2 | 0 | 3 | 2 | 0 | 0 | 0 | 1 | 1 | 0 | 9 |
| Cluster12976 Proteobac Gammaproteobacteria                 | 0 | 2 | 4 | 0 | 0 | 1 | 1 | 0 | 0 | 0 | 0 | 1 | 9 |
| Cluster14773 Proteobac Betapr Burkl Oxalobacteraceae       | 2 | 0 | 1 | 0 | 1 | 0 | 1 | 1 | 3 | 0 | 0 | 0 | 9 |
| Cluster14809 Acidobact Acidobacteria_Gp2 Gp2               | 1 | 1 | 3 | 0 | 0 | 0 | 0 | 0 | 0 | 2 | 2 | 0 | 9 |
| Cluster15171 Acidobact Acidobacteria_Gp3 Gp3               | 1 | 2 | 0 | 0 | 0 | 1 | 0 | 1 | 4 | 0 | 0 | 0 | 9 |
| Cluster16108 Acidobact Acidobacteria_Gp1 Granulicella      | 0 | 0 | 1 | 0 | 2 | 1 | 0 | 0 | 1 | 4 | 0 | 0 | 9 |
| Cluster16160 Acidobact Acidobacteria_Gp1                   | 0 | 0 | 0 | 2 | 2 | 0 | 0 | 0 | 2 | 1 | 2 | 0 | 9 |
| Cluster16270 Acidobact Acidobacteria_Gp2 Gp2               | 0 | 0 | 3 | 5 | 0 | 0 | 0 | 0 | 0 | 0 | 1 | 0 | 9 |
| Cluster16282 Acidobact Acidobacteria_Gp2 Gp2               | 1 | 0 | 0 | 0 | 0 | 0 | 0 | 0 | 3 | 0 | 3 | 2 | 9 |
| Cluster17089 Acidobact Acidobacteria_Gp1                   | 0 | 0 | 0 | 1 | 0 | 0 | 0 | 0 | 2 | 6 | 0 | 0 | 9 |
| Cluster17249 Proteobac Alphap Caulc Caulob Phenyllobacter  | 0 | 2 | 2 | 0 | 0 | 0 | 0 | 1 | 2 | 1 | 1 | 0 | 9 |
| Cluster18922 Acidobact Acidobacteria_Gp3 Gp3               | 0 | 1 | 0 | 1 | 1 | 0 | 0 | 1 | 1 | 2 | 1 | 1 | 9 |
| Cluster22098 Proteobac Gammaproteobacteria                 | 0 | 0 | 1 | 0 | 0 | 1 | 0 | 4 | 0 | 1 | 0 | 2 | 9 |
| Cluster22141 Proteobac Alphap Rhod Acetob Acidisphaera     | 4 | 0 | 3 | 1 | 0 | 0 | 0 | 0 | 0 | 1 | 0 | 0 | 9 |
| Cluster23397 Proteobac Gamm Xantl Sinobac Steroidobacter   | 1 | 2 | 1 | 0 | 0 | 3 | 0 | 0 | 1 | 1 | 0 | 0 | 9 |
| Cluster25738 Bacteroid Sphing Sphir Chitino Flavitalea     | 1 | 1 | 0 | 0 | 0 | 4 | 2 | 0 | 1 | 0 | 0 | 0 | 9 |
| Cluster29218 Bacteroid Sphing Sphir Sphingobacteriaceae    | 2 | 1 | 0 | 0 | 0 | 1 | 0 | 0 | 3 | 0 | 0 | 2 | 9 |
| Cluster30;size=69                                          | 2 | 0 | 0 | 0 | 2 | 1 | 1 | 0 | 2 | 0 | 0 | 0 | 8 |

|                                                                 |   |   |   |   |   |   |   |   |   |   |   |   |   |
|-----------------------------------------------------------------|---|---|---|---|---|---|---|---|---|---|---|---|---|
| Cluster54;size=55; Proteobac Alphap Rhodospirillales            | 0 | 2 | 0 | 0 | 2 | 0 | 0 | 1 | 3 | 0 | 0 | 0 | 8 |
| Cluster58;size=55; Acidobact Acidobacteria_Gp2 Gp2              | 0 | 0 | 1 | 1 | 2 | 0 | 0 | 1 | 1 | 1 | 1 | 0 | 8 |
| Cluster81;size=55; Proteobac Betapr Burkholderia                | 0 | 0 | 0 | 1 | 1 | 3 | 0 | 0 | 2 | 1 | 0 | 0 | 8 |
| Cluster112;size=55                                              | 0 | 0 | 1 | 2 | 0 | 1 | 2 | 0 | 0 | 1 | 1 | 0 | 8 |
| Cluster178;size=55; Proteobac Deltap Myxyc Polyangiaceae        | 1 | 0 | 1 | 1 | 0 | 1 | 1 | 1 | 0 | 1 | 1 | 0 | 8 |
| Cluster302;size=62                                              | 3 | 1 | 1 | 0 | 1 | 1 | 0 | 0 | 0 | 1 | 0 | 0 | 8 |
| Cluster387;size=62; Proteobac Alphap Rhodospirillales           | 2 | 0 | 1 | 0 | 0 | 1 | 0 | 0 | 1 | 2 | 1 | 0 | 8 |
| Cluster507;size=51                                              | 0 | 0 | 0 | 0 | 0 | 1 | 0 | 1 | 5 | 0 | 0 | 1 | 8 |
| Cluster631;size=51; Acidobact Acidobacteria_Gp1                 | 0 | 0 | 2 | 1 | 1 | 1 | 0 | 2 | 1 | 0 | 0 | 0 | 8 |
| Cluster710;size=51; Acidobact Acidobacteria_Gp2 Gp2             | 0 | 3 | 0 | 0 | 0 | 0 | 0 | 0 | 2 | 0 | 1 | 2 | 8 |
| Cluster752;size=51; Acidobact Acidobacteria_Gp1 Gp1             | 0 | 3 | 0 | 0 | 0 | 0 | 2 | 2 | 0 | 0 | 0 | 1 | 8 |
| Cluster777;size=51; Proteobac Alphap Rhod Acetobac Acidisphaera | 0 | 0 | 0 | 1 | 2 | 2 | 1 | 0 | 0 | 2 | 0 | 0 | 8 |
| Cluster1161;size=35                                             | 1 | 0 | 0 | 0 | 0 | 4 | 1 | 0 | 0 | 1 | 0 | 1 | 8 |
| Cluster1263;size=35; Acidobacteria                              | 2 | 0 | 0 | 0 | 1 | 0 | 0 | 1 | 1 | 1 | 2 | 0 | 8 |
| Cluster1288;size=35; Acidobact Acidobacteria_Gp2 Gp2            | 0 | 0 | 0 | 0 | 0 | 1 | 1 | 1 | 2 | 1 | 2 | 0 | 8 |
| Cluster1300;size=35; Proteobac Alphap Rhodospirillales          | 0 | 0 | 0 | 1 | 1 | 4 | 0 | 0 | 1 | 0 | 0 | 1 | 8 |
| Cluster1374;size=35; Acidobact Acidobacteria_Gp6 Gp6            | 0 | 2 | 0 | 0 | 2 | 0 | 1 | 1 | 0 | 1 | 0 | 1 | 8 |
| Cluster1445;size=35; Acidobact Acidobacteria_Gp2 Gp2            | 1 | 2 | 0 | 0 | 1 | 0 | 1 | 0 | 0 | 0 | 1 | 2 | 8 |
| Cluster1585;size=35; Acidobact Acidobacteria_Gp1 Granulicella   | 2 | 0 | 0 | 3 | 0 | 1 | 0 | 0 | 0 | 1 | 1 | 0 | 8 |
| Cluster1610;size=35; Acidobact Acidobacteria_Gp2 Gp2            | 1 | 1 | 2 | 0 | 0 | 1 | 1 | 0 | 1 | 1 | 0 | 0 | 8 |
| Cluster1687;size=35; Acidobact Acidobacteria_Gp3 Bryobacter     | 1 | 0 | 0 | 0 | 2 | 0 | 0 | 0 | 1 | 1 | 0 | 3 | 8 |
| Cluster1698;size=35; Bacteroid Sphing Sphir Chitinophagaceae    | 1 | 2 | 1 | 0 | 0 | 1 | 1 | 0 | 0 | 0 | 1 | 1 | 8 |
| Cluster1705;size=35; Bacteroid Sphing Sphir Chitinophagaceae    | 0 | 1 | 0 | 1 | 2 | 2 | 0 | 1 | 0 | 0 | 1 | 0 | 8 |
| Cluster1846;size=35; Acidobact Acidobacteria_Gp3 Gp3            | 2 | 0 | 1 | 0 | 0 | 0 | 0 | 0 | 0 | 3 | 2 | 0 | 8 |
| Cluster2108;size=35; Acidobact Acidobacteria_Gp2 Gp2            | 0 | 1 | 1 | 0 | 2 | 0 | 2 | 0 | 0 | 1 | 1 | 0 | 8 |
| Cluster2149;size=35; Actinobac Actinol Acidimii Aciditerrimonas | 1 | 1 | 2 | 1 | 1 | 1 | 0 | 0 | 0 | 0 | 1 | 0 | 8 |
| Cluster2199;size=35; Proteobac Gamm Xant Sinobac Steroidobacter | 0 | 2 | 2 | 1 | 0 | 0 | 0 | 0 | 0 | 3 | 0 | 0 | 8 |
| Cluster2323;size=29                                             | 2 | 0 | 0 | 0 | 1 | 1 | 0 | 2 | 0 | 0 | 1 | 1 | 8 |
| Cluster2346;size=29; Acidobact Acidobacteria_Gp1                | 0 | 1 | 0 | 1 | 0 | 0 | 1 | 1 | 2 | 1 | 1 | 0 | 8 |

|                                                              |   |   |   |   |   |   |   |   |   |   |   |   |   |
|--------------------------------------------------------------|---|---|---|---|---|---|---|---|---|---|---|---|---|
| Cluster2487; Acidobact Acidobacteria_Gp10 Gp10               | 1 | 2 | 1 | 2 | 1 | 0 | 0 | 0 | 1 | 0 | 0 | 0 | 8 |
| Cluster2497; Bacteroid Sphing Sphir Chitinophagaceae         | 2 | 1 | 0 | 0 | 1 | 0 | 3 | 0 | 1 | 0 | 0 | 0 | 8 |
| Cluster2668; Proteobac Alphap Rhizc Methylocystaceae         | 1 | 0 | 2 | 2 | 0 | 0 | 0 | 0 | 1 | 1 | 1 | 0 | 8 |
| Cluster2775; Actinobac Actinol Acidi Acidimii Aciditerrimona | 0 | 0 | 1 | 0 | 1 | 0 | 1 | 0 | 1 | 3 | 1 | 0 | 8 |
| Cluster3053; Proteobac Betapr Burkl Oxalobacteraceae         | 1 | 0 | 0 | 0 | 1 | 2 | 0 | 1 | 2 | 0 | 1 | 0 | 8 |
| Cluster3126; Proteobac Betapr Burkl Burkhol Burkholderia     | 3 | 0 | 0 | 1 | 1 | 1 | 0 | 0 | 0 | 2 | 0 | 0 | 8 |
| Cluster3163; Bacteroidetes                                   | 1 | 1 | 1 | 0 | 0 | 0 | 0 | 1 | 0 | 0 | 4 | 0 | 8 |
| Cluster3166; Proteobac Alphap Rhod Acetobacteraceae          | 0 | 0 | 1 | 0 | 0 | 1 | 0 | 0 | 0 | 4 | 1 | 1 | 8 |
| Cluster3367; Acidobact Acidobacteria_Gp6 Gp6                 | 1 | 1 | 0 | 0 | 1 | 0 | 1 | 0 | 2 | 1 | 0 | 1 | 8 |
| Cluster3540; Verrucom Subdivision3 Subdivision3_ε            | 3 | 0 | 0 | 0 | 1 | 1 | 0 | 0 | 0 | 0 | 1 | 2 | 8 |
| Cluster3729; Acidobacteria                                   | 0 | 2 | 0 | 0 | 1 | 1 | 2 | 1 | 0 | 0 | 1 | 0 | 8 |
| Cluster4446; Proteobac Alphap Rhod Rhodospirillaceae         | 0 | 0 | 2 | 2 | 1 | 1 | 0 | 1 | 1 | 0 | 0 | 0 | 8 |
| Cluster4466; Bacteroid Sphing Sphir Sphingo Mucilaginibact   | 1 | 1 | 1 | 0 | 0 | 0 | 0 | 0 | 1 | 4 | 0 | 0 | 8 |
| Cluster4790; Proteobac Alphap Rhodospirillales               | 0 | 1 | 0 | 0 | 0 | 2 | 0 | 2 | 1 | 0 | 2 | 0 | 8 |
| Cluster5123; Verrucom Opitut; Opitu Opituta Opitutus         | 0 | 2 | 0 | 0 | 0 | 0 | 1 | 0 | 1 | 3 | 0 | 1 | 8 |
| Cluster5382; Proteobac Alphap Rhodospirillales               | 0 | 2 | 0 | 0 | 0 | 0 | 1 | 0 | 3 | 0 | 2 | 0 | 8 |
| Cluster6402; Proteobac Alphap Rhizobiales                    | 1 | 1 | 0 | 2 | 2 | 1 | 0 | 0 | 1 | 0 | 0 | 0 | 8 |
| Cluster6435; Proteobac Alphap Rhodospirillales               | 1 | 0 | 0 | 0 | 0 | 1 | 2 | 2 | 1 | 0 | 0 | 1 | 8 |
| Cluster6674; Acidobact Acidobacteria_Gp2 Gp2                 | 0 | 0 | 0 | 0 | 0 | 0 | 0 | 1 | 5 | 0 | 1 | 1 | 8 |
| Cluster7085; Acidobact Acidobacteria_Gp1 Gp1                 | 0 | 0 | 4 | 1 | 0 | 1 | 1 | 0 | 0 | 1 | 0 | 0 | 8 |
| Cluster7150; Actinobac Actinol Actinomycetales               | 1 | 0 | 0 | 2 | 0 | 0 | 0 | 1 | 0 | 4 | 0 | 0 | 8 |
| Cluster7224; Acidobact Acidobacteria_Gp1 Gp1                 | 0 | 0 | 0 | 3 | 3 | 0 | 0 | 0 | 0 | 2 | 0 | 0 | 8 |
| Cluster7262; Proteobac Deltaproteobacteria                   | 0 | 1 | 0 | 1 | 0 | 1 | 1 | 0 | 1 | 0 | 3 | 0 | 8 |
| Cluster7912; Bacteroid Sphing Sphir Chitinophagaceae         | 3 | 0 | 1 | 1 | 0 | 0 | 0 | 0 | 1 | 1 | 1 | 0 | 8 |
| Cluster8250;size=36                                          | 1 | 0 | 0 | 0 | 2 | 3 | 2 | 0 | 0 | 0 | 0 | 0 | 8 |
| Cluster8563; Acidobact Acidobacteria_Gp10 Gp10               | 0 | 1 | 1 | 0 | 0 | 0 | 2 | 0 | 4 | 0 | 0 | 0 | 8 |
| Cluster9738; Proteobac Alphap Caulc Cauloba Phenylobacter    | 0 | 1 | 1 | 0 | 0 | 1 | 2 | 0 | 2 | 0 | 0 | 1 | 8 |
| Cluster9951; Proteobac Deltap Myxococcales                   | 0 | 0 | 0 | 0 | 0 | 1 | 2 | 0 | 2 | 0 | 2 | 1 | 8 |
| Cluster10084 Acidobact Acidobacteria_Gp1                     | 0 | 0 | 0 | 0 | 0 | 0 | 1 | 2 | 1 | 3 | 1 | 0 | 8 |

|              |               |                     |                              |   |   |   |   |   |   |   |   |   |   |   |   |   |
|--------------|---------------|---------------------|------------------------------|---|---|---|---|---|---|---|---|---|---|---|---|---|
| Cluster11410 | Acidobact     | Acidobacteria_Gp1   | Gp1                          | 2 | 0 | 0 | 0 | 0 | 1 | 4 | 1 | 0 | 0 | 0 | 0 | 8 |
| Cluster12447 | Acidobact     | Acidobacteria_Gp3   | Gp3                          | 0 | 0 | 0 | 0 | 0 | 0 | 1 | 1 | 2 | 2 | 2 | 0 | 8 |
| Cluster12721 | Acidobacteria |                     |                              | 0 | 2 | 0 | 0 | 0 | 0 | 2 | 0 | 4 | 0 | 0 | 0 | 8 |
| Cluster13406 | Proteobac     | Alphap              | Rhizobiales                  | 0 | 2 | 1 | 2 | 1 | 0 | 0 | 0 | 0 | 0 | 0 | 2 | 8 |
| Cluster14176 | Acidobact     | Acidobacteria_Gp10  | Gp10                         | 0 | 1 | 0 | 0 | 0 | 0 | 0 | 1 | 5 | 0 | 0 | 1 | 8 |
| Cluster14515 | Acidobact     | Acidobacteria_Gp1   |                              | 2 | 1 | 0 | 1 | 4 | 0 | 0 | 0 | 0 | 0 | 0 | 0 | 8 |
| Cluster14608 | Proteobac     | Alphaproteobacteria |                              | 0 | 0 | 0 | 1 | 2 | 1 | 0 | 0 | 0 | 1 | 3 | 0 | 8 |
| Cluster14975 | Proteobac     | Alphap              | Rhizc Bradyrh Bradyrhizobiur | 1 | 1 | 2 | 0 | 0 | 0 | 0 | 0 | 0 | 2 | 2 | 0 | 8 |
| Cluster15400 | Acidobact     | Acidobacteria_Gp1   | Edaphobacter                 | 3 | 1 | 0 | 1 | 1 | 0 | 0 | 0 | 0 | 1 | 1 | 0 | 8 |
| Cluster15997 | Acidobact     | Acidobacteria_Gp1   | Gp1                          | 0 | 1 | 0 | 0 | 0 | 1 | 0 | 2 | 1 | 1 | 2 | 0 | 8 |
| Cluster16249 | Proteobac     | Alphaproteobacteria |                              | 0 | 0 | 1 | 0 | 0 | 0 | 0 | 0 | 0 | 5 | 2 | 0 | 8 |
| Cluster16817 | Acidobact     | Acidobacteria_Gp1   |                              | 0 | 0 | 1 | 0 | 0 | 0 | 0 | 0 | 0 | 3 | 4 | 0 | 8 |
| Cluster17168 | size=78       |                     |                              | 0 | 0 | 1 | 2 | 0 | 1 | 0 | 0 | 4 | 0 | 0 | 0 | 8 |
| Cluster17310 | Acidobact     | Acidobacteria_Gp1   | Gp1                          | 1 | 0 | 1 | 1 | 0 | 1 | 0 | 0 | 0 | 1 | 3 | 0 | 8 |
| Cluster18130 | Acidobact     | Acidobacteria_Gp2   | Gp2                          | 0 | 4 | 0 | 0 | 0 | 0 | 0 | 0 | 1 | 0 | 0 | 3 | 8 |
| Cluster18586 | Proteobac     | Alphap              | Rhizc Methylocystaceae       | 0 | 0 | 1 | 1 | 2 | 2 | 1 | 0 | 1 | 0 | 0 | 0 | 8 |
| Cluster18765 | Acidobact     | Acidobacteria_Gp3   | Gp3                          | 1 | 1 | 1 | 0 | 2 | 1 | 0 | 0 | 1 | 1 | 0 | 0 | 8 |
| Cluster18863 | Proteobac     | Betapr              | Burkl Oxalobz Collimonas     | 0 | 0 | 0 | 0 | 1 | 2 | 0 | 4 | 1 | 0 | 0 | 0 | 8 |
| Cluster19135 | Acidobact     | Acidobacteria_Gp3   | Gp3                          | 0 | 0 | 1 | 0 | 0 | 1 | 2 | 0 | 0 | 2 | 2 | 0 | 8 |
| Cluster20157 | Acidobact     | Acidobacteria_Gp3   | Gp3                          | 0 | 0 | 1 | 5 | 1 | 1 | 0 | 0 | 0 | 0 | 0 | 0 | 8 |
| Cluster20224 | Actinobac     | Actinol             | Solirt Conexib Conexibacter  | 0 | 1 | 1 | 0 | 2 | 0 | 2 | 1 | 1 | 0 | 0 | 0 | 8 |
| Cluster22182 | Acidobact     | Acidobacteria_Gp1   | Gp1                          | 1 | 1 | 0 | 0 | 0 | 0 | 0 | 2 | 1 | 1 | 2 | 0 | 8 |
| Cluster22297 | Acidobact     | Acidobacteria_Gp2   | Gp2                          | 1 | 0 | 3 | 0 | 0 | 1 | 1 | 0 | 1 | 1 | 0 | 0 | 8 |
| Cluster22430 | Proteobac     | Gamm                | Xantl Sinobac Steroidobacter | 2 | 0 | 2 | 0 | 2 | 1 | 0 | 0 | 0 | 0 | 0 | 1 | 8 |
| Cluster22891 | Proteobac     | Gamm                | Xanthomonadales              | 0 | 0 | 0 | 0 | 1 | 1 | 0 | 1 | 0 | 0 | 5 | 0 | 8 |
| Cluster23610 | Proteobac     | Alphap              | Alphaproteok Rhizomicrobiu   | 1 | 1 | 0 | 0 | 1 | 0 | 1 | 2 | 0 | 0 | 0 | 2 | 8 |
| Cluster24201 | Proteobac     | Alphap              | Alphaproteok Rhizomicrobiu   | 2 | 0 | 0 | 0 | 2 | 2 | 1 | 1 | 0 | 0 | 0 | 0 | 8 |
| Cluster24597 | Chloroflex    | Ktedor              | Ktedonobacterales            | 0 | 0 | 0 | 1 | 0 | 0 | 4 | 1 | 0 | 0 | 2 | 0 | 8 |
| Cluster27776 | Bacteroid     | Sphing              | Sphir Chitinophagaceae       | 0 | 1 | 1 | 0 | 1 | 4 | 0 | 0 | 0 | 0 | 1 | 0 | 8 |





|                                                               |   |   |   |   |   |   |   |   |   |   |   |   |   |
|---------------------------------------------------------------|---|---|---|---|---|---|---|---|---|---|---|---|---|
| Cluster2517; Actinobac Actinobacteria                         | 1 | 0 | 0 | 0 | 1 | 1 | 0 | 1 | 2 | 0 | 1 | 0 | 7 |
| Cluster2646; Acidobact Acidobacteria_Gp1                      | 0 | 3 | 0 | 0 | 0 | 0 | 0 | 0 | 0 | 0 | 1 | 3 | 7 |
| Cluster2682; Acidobact Acidobacteria_Gp3 Gp3                  | 1 | 1 | 0 | 0 | 1 | 1 | 0 | 0 | 1 | 0 | 2 | 0 | 7 |
| Cluster2748; Proteobac Betapr Burkli Oxalobac Oxalicibacteriu | 2 | 0 | 0 | 0 | 2 | 1 | 0 | 1 | 1 | 0 | 0 | 0 | 7 |
| Cluster2796; Actinobac Actinol Acidimicrobiales               | 0 | 1 | 0 | 0 | 0 | 0 | 3 | 0 | 1 | 0 | 0 | 2 | 7 |
| Cluster2846; Proteobac Alphap Alphaproteok Rhizomicrobiu      | 1 | 1 | 0 | 1 | 0 | 1 | 1 | 0 | 0 | 1 | 1 | 0 | 7 |
| Cluster2915;size=11                                           | 0 | 0 | 0 | 0 | 0 | 1 | 0 | 0 | 0 | 1 | 1 | 4 | 7 |
| Cluster2988; Proteobac Gamm Xantl Sinobac Steroidobacter      | 1 | 0 | 2 | 2 | 0 | 0 | 0 | 0 | 0 | 0 | 0 | 2 | 7 |
| Cluster3109; Acidobact Acidobacteria_Gp2 Gp2                  | 2 | 0 | 0 | 0 | 2 | 0 | 0 | 2 | 0 | 1 | 0 | 0 | 7 |
| Cluster3110; Proteobacteria                                   | 1 | 0 | 0 | 1 | 0 | 1 | 0 | 0 | 0 | 3 | 1 | 0 | 7 |
| Cluster3159; Verrucom Opitut; Opitu Opituta Opitutus          | 0 | 2 | 0 | 0 | 0 | 0 | 0 | 0 | 0 | 0 | 0 | 5 | 7 |
| Cluster3241; Acidobacteria                                    | 0 | 0 | 0 | 0 | 0 | 1 | 3 | 0 | 0 | 0 | 3 | 0 | 7 |
| Cluster3353; Verrucom Subdivision3 Subdivision3_ξ             | 1 | 1 | 1 | 1 | 1 | 0 | 0 | 0 | 1 | 1 | 0 | 0 | 7 |
| Cluster3413; Acidobact Acidobacteria_Gp2 Gp2                  | 0 | 0 | 0 | 2 | 1 | 0 | 1 | 0 | 3 | 0 | 0 | 0 | 7 |
| Cluster3460; Acidobact Acidobacteria_Gp1                      | 0 | 0 | 1 | 1 | 0 | 1 | 1 | 0 | 0 | 1 | 2 | 0 | 7 |
| Cluster3577; Acidobact Acidobacteria_Gp13 Gp13                | 0 | 2 | 0 | 0 | 1 | 0 | 0 | 0 | 1 | 0 | 2 | 1 | 7 |
| Cluster3596; Acidobact Acidobacteria_Gp6 Gp6                  | 0 | 0 | 0 | 1 | 2 | 0 | 2 | 0 | 0 | 0 | 1 | 1 | 7 |
| Cluster3842; Acidobact Acidobacteria_Gp6 Gp6                  | 0 | 0 | 0 | 1 | 3 | 1 | 0 | 1 | 0 | 0 | 1 | 0 | 7 |
| Cluster4233;size=16                                           | 0 | 0 | 0 | 2 | 4 | 0 | 0 | 1 | 0 | 0 | 0 | 0 | 7 |
| Cluster4744; Acidobact Acidobacteria_Gp1 Gp1                  | 0 | 1 | 0 | 0 | 0 | 1 | 2 | 2 | 1 | 0 | 0 | 0 | 7 |
| Cluster4980; Proteobac Alphap Rhodospirillales                | 0 | 1 | 1 | 0 | 0 | 1 | 1 | 1 | 2 | 0 | 0 | 0 | 7 |
| Cluster5021; Acidobact Acidobacteria_Gp2 Gp2                  | 0 | 2 | 0 | 0 | 0 | 0 | 0 | 1 | 2 | 0 | 1 | 1 | 7 |
| Cluster5064;size=18                                           | 0 | 4 | 0 | 0 | 0 | 0 | 0 | 0 | 0 | 0 | 0 | 3 | 7 |
| Cluster5689; Verrucom Opitutae                                | 1 | 0 | 0 | 0 | 3 | 1 | 1 | 0 | 0 | 1 | 0 | 0 | 7 |
| Cluster5866; Acidobact Acidobacteria_Gp2 Gp2                  | 0 | 0 | 0 | 0 | 1 | 0 | 3 | 2 | 0 | 0 | 0 | 1 | 7 |
| Cluster6617; Acidobact Acidobacteria_Gp1 Edaphobacter         | 0 | 1 | 0 | 2 | 1 | 1 | 0 | 2 | 0 | 0 | 0 | 0 | 7 |
| Cluster6637; Verrucom Subdivision3 Subdivision3_ξ             | 2 | 0 | 2 | 0 | 2 | 0 | 0 | 0 | 0 | 1 | 0 | 0 | 7 |
| Cluster7378; Proteobac Alphap Rhodospirillales                | 0 | 0 | 0 | 2 | 1 | 2 | 0 | 1 | 0 | 0 | 0 | 1 | 7 |
| Cluster7785; Proteobac Alphap Rhodospirillales                | 3 | 0 | 0 | 1 | 0 | 0 | 0 | 0 | 1 | 0 | 0 | 2 | 7 |

|                                                             |   |   |   |   |   |   |   |   |   |   |   |   |   |
|-------------------------------------------------------------|---|---|---|---|---|---|---|---|---|---|---|---|---|
| Cluster8211; Chlamydi; Chlamy; Chlar Parachlamydiaceae      | 0 | 0 | 0 | 0 | 1 | 0 | 1 | 0 | 2 | 0 | 1 | 2 | 7 |
| Cluster8507; Acidobact Acidobacteria_Gp2 Gp2                | 0 | 0 | 0 | 1 | 0 | 0 | 2 | 1 | 0 | 1 | 1 | 1 | 7 |
| Cluster8717; Acidobact Acidobacteria_Gp3 Gp3                | 1 | 0 | 1 | 1 | 1 | 1 | 1 | 0 | 0 | 1 | 0 | 0 | 7 |
| Cluster8755; Proteobac Deltap Myxc Polyangiaceae            | 0 | 0 | 1 | 0 | 1 | 0 | 1 | 0 | 1 | 2 | 1 | 0 | 7 |
| Cluster8801; Acidobact Acidobacteria_Gp2 Gp2                | 0 | 0 | 0 | 0 | 0 | 0 | 0 | 2 | 5 | 0 | 0 | 0 | 7 |
| Cluster9106; Proteobac Alphap Rhizc Hyphon Rhodoplanes      | 2 | 1 | 2 | 0 | 0 | 0 | 0 | 0 | 1 | 1 | 0 | 0 | 7 |
| Cluster9153; Proteobac Deltap Myxc Polyangiaceae            | 2 | 0 | 0 | 0 | 0 | 3 | 0 | 0 | 0 | 1 | 1 | 0 | 7 |
| Cluster9707; Proteobac Alphap Rhizobiales                   | 0 | 0 | 0 | 5 | 0 | 0 | 0 | 0 | 1 | 0 | 1 | 0 | 7 |
| Cluster10820 Armatimc Armati Arma Armatin Armatimonas/      | 2 | 0 | 0 | 0 | 1 | 2 | 0 | 1 | 0 | 0 | 0 | 1 | 7 |
| Cluster11070 Proteobac Gamm Xantl Sinobac Steroidobacter    | 1 | 2 | 0 | 0 | 0 | 0 | 0 | 0 | 1 | 0 | 0 | 3 | 7 |
| Cluster11212 Acidobact Acidobacteria_Gp1 Gp1                | 0 | 1 | 0 | 1 | 0 | 1 | 1 | 2 | 0 | 0 | 0 | 1 | 7 |
| Cluster11599 Bacteroid Sphing Sphir Chitino; Ferruginibacte | 0 | 2 | 0 | 0 | 0 | 1 | 0 | 1 | 2 | 0 | 0 | 1 | 7 |
| Cluster13373 Verrucom Opitut; Opitu Opituta Opitutus        | 1 | 1 | 0 | 0 | 1 | 1 | 0 | 0 | 1 | 1 | 0 | 1 | 7 |
| Cluster13806 Proteobac Alphap Alphaproteok Rhizomicrobiu    | 0 | 2 | 0 | 0 | 0 | 2 | 1 | 1 | 0 | 0 | 1 | 0 | 7 |
| Cluster14458 Proteobac Gamm Xantl Sinobac Steroidobacter    | 0 | 0 | 1 | 0 | 0 | 2 | 1 | 1 | 0 | 2 | 0 | 0 | 7 |
| Cluster14766 Acidobact Acidobacteria_Gp1                    | 2 | 1 | 0 | 0 | 0 | 1 | 0 | 2 | 1 | 0 | 0 | 0 | 7 |
| Cluster14846 Acidobact Acidobacteria_Gp1 Gp1                | 0 | 0 | 1 | 2 | 1 | 0 | 1 | 0 | 0 | 1 | 1 | 0 | 7 |
| Cluster14909 Actinobac Actinol Actin Mycoba Mycobacteriur   | 0 | 0 | 1 | 1 | 1 | 0 | 1 | 1 | 0 | 0 | 2 | 0 | 7 |
| Cluster15098 Acidobact Acidobacteria_Gp1                    | 3 | 0 | 0 | 0 | 0 | 0 | 1 | 0 | 0 | 2 | 1 | 0 | 7 |
| Cluster15311 Acidobact Acidobacteria_Gp1 Gp1                | 1 | 0 | 0 | 4 | 0 | 1 | 0 | 0 | 1 | 0 | 0 | 0 | 7 |
| Cluster15351 Acidobact Acidobacteria_Gp1 Gp1                | 1 | 0 | 0 | 0 | 1 | 0 | 1 | 0 | 0 | 2 | 1 | 1 | 7 |
| Cluster16682 Proteobac Alphaproteobacteria                  | 0 | 0 | 0 | 0 | 1 | 2 | 0 | 0 | 1 | 0 | 3 | 0 | 7 |
| Cluster16861 Acidobact Acidobacteria_Gp1                    | 0 | 0 | 0 | 0 | 0 | 3 | 0 | 0 | 3 | 0 | 1 | 0 | 7 |
| Cluster17494 Acidobact Acidobacteria_Gp1                    | 0 | 0 | 0 | 1 | 0 | 2 | 0 | 0 | 0 | 3 | 1 | 0 | 7 |
| Cluster17607 Proteobac Betapr Burkl Burkhol Burkholderia    | 0 | 1 | 0 | 1 | 0 | 0 | 0 | 1 | 0 | 0 | 0 | 4 | 7 |
| Cluster19153 Acidobact Acidobacteria_Gp3 Gp3                | 1 | 0 | 0 | 0 | 1 | 3 | 2 | 0 | 0 | 0 | 0 | 0 | 7 |
| Cluster19897 Proteobac Gamm Xantl Sinobacteraceae           | 0 | 2 | 0 | 0 | 1 | 0 | 0 | 1 | 0 | 0 | 1 | 2 | 7 |
| Cluster20495 Acidobact Acidobacteria_Gp1                    | 1 | 0 | 0 | 1 | 0 | 0 | 1 | 2 | 1 | 0 | 1 | 0 | 7 |
| Cluster20586 Proteobac Alphap Alphaproteok Rhizomicrobiu    | 0 | 0 | 0 | 2 | 0 | 0 | 1 | 0 | 1 | 3 | 0 | 0 | 7 |

|                                                                         |   |   |   |   |   |   |   |   |   |   |   |   |   |
|-------------------------------------------------------------------------|---|---|---|---|---|---|---|---|---|---|---|---|---|
| Cluster21013 Actinobac Actinol Solirubrobacterales                      | 1 | 0 | 0 | 0 | 0 | 0 | 1 | 1 | 0 | 1 | 3 | 0 | 7 |
| Cluster21289 Chloroflex Ktedor Ktedonobacterales                        | 0 | 2 | 0 | 0 | 1 | 0 | 1 | 0 | 0 | 0 | 0 | 3 | 7 |
| Cluster21850 Actinobac Actinol Solirubrobacterales Conexib Conexibacter | 1 | 0 | 0 | 0 | 1 | 0 | 1 | 0 | 0 | 3 | 1 | 0 | 7 |
| Cluster22541 Acidobact Acidobacteria_Gp6 Gp6                            | 1 | 0 | 0 | 2 | 0 | 0 | 2 | 0 | 0 | 0 | 1 | 1 | 7 |
| Cluster25162 Proteobac Alphap Caulc Caulobacteraceae                    | 1 | 1 | 0 | 2 | 0 | 0 | 0 | 1 | 0 | 1 | 0 | 1 | 7 |
| Cluster27044 Bacteroid Sphing Sphir Chitinophagaceae                    | 1 | 0 | 2 | 0 | 0 | 0 | 0 | 1 | 0 | 1 | 2 | 0 | 7 |
| Cluster28435 Actinobac Actinol Actinomycetales                          | 0 | 0 | 0 | 1 | 2 | 0 | 0 | 0 | 1 | 0 | 3 | 0 | 7 |
| Cluster14;size=42 Proteobac Alphap Rhodospirillales                     | 2 | 2 | 1 | 0 | 0 | 0 | 0 | 0 | 0 | 0 | 0 | 1 | 6 |
| Cluster16;size=42 Proteobac Alphap Rhizobiales                          | 1 | 0 | 0 | 0 | 1 | 0 | 1 | 1 | 0 | 0 | 0 | 2 | 6 |
| Cluster20;size=42 Acidobact Acidobacteria_Gp2 Gp2                       | 0 | 0 | 0 | 2 | 2 | 0 | 0 | 0 | 0 | 2 | 0 | 0 | 6 |
| Cluster34;size=42                                                       | 0 | 0 | 1 | 1 | 0 | 0 | 2 | 0 | 1 | 0 | 1 | 0 | 6 |
| Cluster66;size=42 Proteobac Alphap Rhizobiales                          | 0 | 2 | 0 | 0 | 0 | 0 | 0 | 0 | 0 | 1 | 0 | 3 | 6 |
| Cluster126;size=42 Verrucom Subdivision3 Subdivision3_ε                 | 0 | 0 | 0 | 1 | 0 | 2 | 0 | 1 | 0 | 0 | 1 | 1 | 6 |
| Cluster158;size=42 Acidobact Acidobacteria_Gp1                          | 3 | 0 | 0 | 0 | 0 | 2 | 0 | 0 | 0 | 1 | 0 | 0 | 6 |
| Cluster180;size=42 Acidobact Acidobacteria_Gp2 Gp2                      | 2 | 0 | 1 | 2 | 0 | 0 | 0 | 1 | 0 | 0 | 0 | 0 | 6 |
| Cluster234;size=42 Acidobact Acidobacteria_Gp3 Gp3                      | 1 | 0 | 0 | 0 | 0 | 2 | 0 | 0 | 0 | 1 | 2 | 0 | 6 |
| Cluster247;size=42 Acidobact Acidobacteria_Gp1 Gp1                      | 0 | 0 | 0 | 1 | 2 | 0 | 0 | 0 | 1 | 0 | 0 | 2 | 6 |
| Cluster258;size=42 Acidobact Acidobacteria_Gp3 Gp3                      | 1 | 0 | 2 | 0 | 0 | 1 | 0 | 0 | 1 | 1 | 0 | 0 | 6 |
| Cluster306;size=42 Proteobac Alphap Rhizobiales                         | 1 | 0 | 0 | 0 | 2 | 0 | 0 | 0 | 0 | 0 | 2 | 1 | 6 |
| Cluster317;size=42 Acidobacteria                                        | 1 | 2 | 0 | 0 | 1 | 0 | 0 | 1 | 0 | 0 | 1 | 0 | 6 |
| Cluster384;size=42 Verrucom Spartobacteria Spartobacteria               | 0 | 1 | 1 | 1 | 1 | 0 | 0 | 0 | 0 | 1 | 1 | 0 | 6 |
| Cluster402;size=42 Acidobact Acidobacteria_Gp1 Gp1                      | 1 | 0 | 0 | 0 | 1 | 1 | 0 | 0 | 0 | 3 | 0 | 0 | 6 |
| Cluster420;size=42 Proteobac Betapr Burkholderia Burkholderia           | 3 | 1 | 0 | 0 | 0 | 1 | 0 | 0 | 0 | 0 | 0 | 1 | 6 |
| Cluster451;size=42 Acidobact Acidobacteria_Gp2 Gp2                      | 2 | 0 | 0 | 2 | 1 | 1 | 0 | 0 | 0 | 0 | 0 | 0 | 6 |
| Cluster526;size=42 Actinobac Actinol Actinomycetales                    | 0 | 0 | 1 | 0 | 0 | 0 | 0 | 0 | 0 | 3 | 2 | 0 | 6 |
| Cluster561;size=42 Acidobact Acidobacteria_Gp1 Gp1                      | 2 | 0 | 0 | 0 | 2 | 1 | 0 | 1 | 0 | 0 | 0 | 0 | 6 |
| Cluster618;size=42 Proteobac Gamm Xanthor Rhodanobacterales             | 1 | 1 | 0 | 0 | 1 | 2 | 1 | 0 | 0 | 0 | 0 | 0 | 6 |
| Cluster724;size=42 Proteobac Gammaproteobacteria                        | 0 | 1 | 1 | 0 | 0 | 0 | 0 | 0 | 0 | 2 | 1 | 1 | 6 |
| Cluster833;size=30                                                      | 0 | 0 | 0 | 0 | 2 | 0 | 0 | 0 | 1 | 0 | 0 | 3 | 6 |

|                                                            |   |   |   |   |   |   |   |   |   |   |   |   |
|------------------------------------------------------------|---|---|---|---|---|---|---|---|---|---|---|---|
| Cluster836;si Proteobac Betapr Burkl Comamonadaceae        | 1 | 2 | 1 | 0 | 0 | 0 | 0 | 0 | 0 | 0 | 2 | 6 |
| Cluster876;si Acidobact Acidobacteria_Gp3 Gp3              | 0 | 1 | 0 | 0 | 1 | 0 | 1 | 0 | 2 | 0 | 0 | 6 |
| Cluster932;si Acidobact Acidobacteria_Gp2 Gp2              | 0 | 3 | 0 | 0 | 0 | 2 | 0 | 1 | 0 | 0 | 0 | 6 |
| Cluster939;si Acidobact Acidobacteria_Gp1 Gp1              | 1 | 1 | 1 | 0 | 0 | 0 | 0 | 2 | 0 | 0 | 1 | 6 |
| Cluster949;si Acidobact Acidobacteria_Gp1 Granulicella     | 2 | 0 | 1 | 0 | 1 | 0 | 0 | 0 | 0 | 2 | 0 | 6 |
| Cluster1032; Acidobact Acidobacteria_Gp1                   | 2 | 0 | 2 | 1 | 0 | 0 | 0 | 0 | 1 | 0 | 0 | 6 |
| Cluster1113; Proteobac Alphap Rhizobiales                  | 0 | 0 | 1 | 0 | 2 | 0 | 0 | 0 | 0 | 3 | 0 | 6 |
| Cluster1131;size=13                                        | 0 | 0 | 2 | 0 | 0 | 1 | 0 | 0 | 0 | 0 | 1 | 6 |
| Cluster1143;size=33                                        | 0 | 0 | 1 | 2 | 1 | 0 | 0 | 0 | 0 | 1 | 1 | 6 |
| Cluster1160; Acidobact Acidobacteria_Gp1 Gp1               | 1 | 1 | 0 | 1 | 0 | 1 | 1 | 0 | 0 | 1 | 0 | 6 |
| Cluster1245; Acidobact Acidobacteria_Gp1                   | 2 | 0 | 0 | 0 | 1 | 0 | 0 | 0 | 0 | 2 | 1 | 6 |
| Cluster1274; Bacteroid Sphing Sphir Chitinophagaceae       | 2 | 0 | 0 | 0 | 0 | 0 | 1 | 0 | 0 | 3 | 0 | 6 |
| Cluster1283; Acidobact Acidobacteria_Gp1 Gp1               | 0 | 2 | 1 | 0 | 0 | 0 | 0 | 1 | 1 | 1 | 0 | 6 |
| Cluster1381; Acidobacteria                                 | 0 | 1 | 0 | 0 | 2 | 0 | 0 | 2 | 0 | 1 | 0 | 6 |
| Cluster1523; Acidobact Acidobacteria_Gp1                   | 1 | 0 | 0 | 1 | 1 | 0 | 2 | 0 | 0 | 0 | 1 | 6 |
| Cluster1530; Chloroflex Ktedor Ktedc Ktedonc Ktedonobacter | 1 | 1 | 1 | 0 | 1 | 0 | 1 | 0 | 0 | 0 | 1 | 6 |
| Cluster1531; Proteobac Betapr Burkl Burkhol Burkholderia   | 1 | 0 | 0 | 1 | 1 | 1 | 0 | 0 | 0 | 2 | 0 | 6 |
| Cluster1552; Acidobact Acidobacteria_Gp2 Gp2               | 0 | 1 | 0 | 0 | 0 | 0 | 0 | 2 | 1 | 0 | 1 | 6 |
| Cluster1581; Acidobact Acidobacteria_Gp1                   | 0 | 0 | 2 | 1 | 0 | 0 | 1 | 0 | 1 | 0 | 1 | 6 |
| Cluster1694; Bacteroid Sphing Sphir Chitinophagaceae       | 1 | 0 | 0 | 0 | 1 | 1 | 0 | 2 | 1 | 0 | 0 | 6 |
| Cluster1730; Acidobact Acidobacteria_Gp3 Gp3               | 0 | 0 | 0 | 0 | 0 | 0 | 0 | 0 | 2 | 3 | 1 | 6 |
| Cluster1777; Acidobact Acidobacteria_Gp1 Gp1               | 0 | 0 | 1 | 0 | 0 | 0 | 2 | 0 | 2 | 0 | 0 | 6 |
| Cluster1789; Actinobac Actinol Solirubrobacterales         | 2 | 1 | 0 | 1 | 0 | 0 | 0 | 1 | 0 | 0 | 0 | 6 |
| Cluster1804; Chlamydi Chlamy Chlamydiales                  | 0 | 0 | 0 | 0 | 0 | 0 | 2 | 2 | 0 | 1 | 0 | 6 |
| Cluster1814; Acidobact Acidobacteria_Gp1                   | 0 | 0 | 0 | 0 | 2 | 0 | 1 | 1 | 0 | 2 | 0 | 6 |
| Cluster1816; Proteobac Alphap Rhizc Hyphon Rhodoplanes     | 0 | 0 | 0 | 1 | 1 | 2 | 0 | 1 | 0 | 0 | 1 | 6 |
| Cluster1823; Proteobac Alphap Rhizobiales                  | 0 | 0 | 0 | 1 | 0 | 0 | 0 | 0 | 0 | 1 | 3 | 6 |
| Cluster1824; Armatimonadetes Armatimonade                  | 1 | 0 | 1 | 0 | 1 | 1 | 0 | 1 | 0 | 0 | 0 | 6 |
| Cluster1840; Proteobac Alphap Rhodospirillales             | 0 | 0 | 0 | 0 | 0 | 2 | 2 | 0 | 1 | 0 | 0 | 6 |

|                                                             |   |   |   |   |   |   |   |   |   |   |   |   |   |
|-------------------------------------------------------------|---|---|---|---|---|---|---|---|---|---|---|---|---|
| Cluster1867;size=12                                         | 0 | 0 | 1 | 1 | 0 | 0 | 1 | 0 | 0 | 3 | 0 | 0 | 6 |
| Cluster1893; Proteobac Gamm Xantl Xanthomonadaceae          | 1 | 0 | 0 | 0 | 0 | 0 | 0 | 1 | 4 | 0 | 0 | 0 | 6 |
| Cluster1988; Proteobac Alphap Rhod Acetobacteraceae         | 0 | 0 | 0 | 0 | 0 | 1 | 2 | 1 | 2 | 0 | 0 | 0 | 6 |
| Cluster1993; Proteobac Alphap Rhizobiales                   | 0 | 1 | 0 | 0 | 3 | 0 | 1 | 0 | 0 | 1 | 0 | 0 | 6 |
| Cluster2252; Proteobac Gammaproteobacteria                  | 1 | 0 | 0 | 1 | 0 | 0 | 0 | 0 | 1 | 1 | 0 | 2 | 6 |
| Cluster2277; Acidobact Acidobacteria_Gp1                    | 0 | 1 | 0 | 0 | 0 | 1 | 0 | 0 | 0 | 0 | 2 | 2 | 6 |
| Cluster2371; Verrucom Subdivision3 Subdivision3_ε           | 1 | 0 | 1 | 0 | 0 | 0 | 0 | 0 | 0 | 2 | 1 | 1 | 6 |
| Cluster2412; Acidobacteria                                  | 1 | 0 | 0 | 1 | 1 | 1 | 1 | 0 | 1 | 0 | 0 | 0 | 6 |
| Cluster2414; Acidobact Acidobacteria_Gp1                    | 1 | 0 | 0 | 0 | 0 | 0 | 0 | 1 | 0 | 1 | 3 | 0 | 6 |
| Cluster2508; Acidobact Acidobacteria_Gp2 Gp2                | 1 | 0 | 0 | 0 | 1 | 1 | 0 | 0 | 1 | 2 | 0 | 0 | 6 |
| Cluster2557; Actinobac Actinol Actin Catenul Catenulispora  | 0 | 0 | 0 | 1 | 1 | 2 | 0 | 0 | 0 | 0 | 0 | 2 | 6 |
| Cluster2632; Actinobac Actinol Actinomycetales              | 0 | 0 | 0 | 1 | 1 | 1 | 1 | 0 | 0 | 0 | 2 | 0 | 6 |
| Cluster2642; Proteobac Alphaproteobacteria                  | 1 | 0 | 1 | 0 | 1 | 0 | 0 | 0 | 0 | 1 | 1 | 1 | 6 |
| Cluster2839; Chlamydi Chlamy Chlamydiales                   | 1 | 0 | 0 | 0 | 1 | 0 | 1 | 0 | 1 | 1 | 0 | 1 | 6 |
| Cluster2841; Proteobac Alphap Rhod Acetobacteraceae         | 2 | 0 | 0 | 0 | 2 | 0 | 0 | 1 | 0 | 1 | 0 | 0 | 6 |
| Cluster2914; Actinobac Actinol Actinomycetales              | 0 | 1 | 1 | 0 | 0 | 2 | 0 | 1 | 0 | 0 | 1 | 0 | 6 |
| Cluster2927; Proteobac Alphap Rhodospirillales              | 0 | 0 | 0 | 1 | 0 | 1 | 1 | 0 | 1 | 0 | 2 | 0 | 6 |
| Cluster3204; Proteobac Alphap Alphaproteob Rhizomicrobiu    | 0 | 0 | 1 | 1 | 1 | 0 | 0 | 0 | 0 | 2 | 0 | 1 | 6 |
| Cluster3261; Actinobac Actinol Acidi Acidimii Aciditerrimon | 0 | 1 | 0 | 1 | 0 | 2 | 0 | 0 | 1 | 0 | 0 | 1 | 6 |
| Cluster3313; Bacteroid Sphing Sphir Sphingo Mucilaginibact  | 1 | 0 | 0 | 0 | 0 | 2 | 2 | 0 | 0 | 0 | 1 | 0 | 6 |
| Cluster3741; Proteobac Deltap Myxc Polyangiaceae            | 0 | 0 | 0 | 0 | 1 | 2 | 0 | 0 | 0 | 1 | 1 | 1 | 6 |
| Cluster3779;size=27                                         | 3 | 0 | 0 | 0 | 0 | 0 | 0 | 1 | 2 | 0 | 0 | 0 | 6 |
| Cluster3946; Acidobact Acidobacteria_Gp7 Gp7                | 1 | 0 | 0 | 0 | 2 | 1 | 0 | 0 | 1 | 0 | 0 | 1 | 6 |
| Cluster4015; Acidobact Acidobacteria_Gp3 Gp3                | 0 | 0 | 0 | 0 | 5 | 0 | 0 | 0 | 1 | 0 | 0 | 0 | 6 |
| Cluster4042; Acidobact Acidobacteria_Gp1                    | 1 | 0 | 1 | 1 | 1 | 0 | 0 | 0 | 0 | 1 | 0 | 1 | 6 |
| Cluster4088; Bacteroid Sphing Sphir Chitinophagaceae        | 0 | 0 | 0 | 1 | 0 | 3 | 0 | 0 | 0 | 0 | 1 | 1 | 6 |
| Cluster4095; Proteobac Alphap Rhodospirillales              | 0 | 1 | 0 | 0 | 1 | 0 | 0 | 2 | 0 | 1 | 1 | 0 | 6 |
| Cluster4116; Acidobact Acidobacteria_Gp2 Gp2                | 1 | 0 | 0 | 0 | 1 | 0 | 3 | 1 | 0 | 0 | 0 | 0 | 6 |
| Cluster5203; Acidobact Acidobacteria_Gp1                    | 0 | 0 | 0 | 0 | 0 | 1 | 0 | 1 | 3 | 0 | 1 | 0 | 6 |



|                                                            |   |   |   |   |   |   |   |   |   |   |   |   |   |
|------------------------------------------------------------|---|---|---|---|---|---|---|---|---|---|---|---|---|
| Cluster12059 Acidobact Acidobacteria_Gp1                   | 0 | 2 | 1 | 2 | 0 | 0 | 0 | 0 | 0 | 0 | 1 | 0 | 6 |
| Cluster12497 Verrucom Opitut; Opitu Opituta Opitutus       | 0 | 1 | 0 | 0 | 0 | 0 | 1 | 0 | 1 | 3 | 0 | 0 | 6 |
| Cluster12965 Actinobac Actinol Soliru Conexib Conexibacter | 0 | 0 | 1 | 0 | 0 | 0 | 0 | 1 | 1 | 1 | 0 | 2 | 6 |
| Cluster13283 Proteobac Alphap Rhizobiales                  | 0 | 0 | 1 | 2 | 0 | 0 | 0 | 0 | 0 | 0 | 1 | 2 | 6 |
| Cluster13642 Actinobac Actinobacteria                      | 0 | 3 | 0 | 0 | 0 | 0 | 0 | 1 | 0 | 0 | 1 | 1 | 6 |
| Cluster13740 Proteobac Deltaproteobacteria                 | 1 | 0 | 0 | 0 | 1 | 0 | 1 | 0 | 1 | 0 | 2 | 0 | 6 |
| Cluster13864 Acidobact Acidobacteria_Gp1 Gp1               | 0 | 0 | 0 | 0 | 0 | 2 | 0 | 1 | 1 | 0 | 2 | 0 | 6 |
| Cluster13882 Acidobact Acidobacteria_Gp1                   | 2 | 0 | 0 | 0 | 0 | 0 | 0 | 0 | 4 | 0 | 0 | 0 | 6 |
| Cluster14025 Acidobact Acidobacteria_Gp1 Gp1               | 0 | 0 | 2 | 0 | 1 | 1 | 0 | 0 | 0 | 0 | 2 | 0 | 6 |
| Cluster14365 Acidobact Acidobacteria_Gp3 Gp3               | 0 | 0 | 1 | 1 | 0 | 1 | 0 | 0 | 0 | 2 | 1 | 0 | 6 |
| Cluster14413 Proteobac Betapr Burkli Oxalobacteraceae      | 2 | 0 | 2 | 0 | 0 | 1 | 0 | 0 | 0 | 1 | 0 | 0 | 6 |
| Cluster14584 Acidobact Acidobacteria_Gp1                   | 0 | 0 | 1 | 1 | 0 | 1 | 0 | 0 | 0 | 3 | 0 | 0 | 6 |
| Cluster14611 Chloroflex Ktedonobacteria                    | 0 | 0 | 0 | 0 | 2 | 0 | 0 | 3 | 1 | 0 | 0 | 0 | 6 |
| Cluster14618 Acidobact Acidobacteria_Gp1                   | 1 | 0 | 0 | 0 | 0 | 2 | 1 | 1 | 1 | 0 | 0 | 0 | 6 |
| Cluster15011 Acidobact Acidobacteria_Gp3 Gp3               | 0 | 1 | 0 | 1 | 0 | 1 | 0 | 2 | 1 | 0 | 0 | 0 | 6 |
| Cluster15876 Acidobact Acidobacteria_Gp2 Gp2               | 0 | 1 | 0 | 0 | 0 | 0 | 1 | 0 | 1 | 0 | 0 | 3 | 6 |
| Cluster16543 Acidobacteria                                 | 0 | 0 | 0 | 4 | 0 | 1 | 0 | 0 | 1 | 0 | 0 | 0 | 6 |
| Cluster16554 Acidobact Acidobacteria_Gp2 Gp2               | 4 | 0 | 2 | 0 | 0 | 0 | 0 | 0 | 0 | 0 | 0 | 0 | 6 |
| Cluster16741 Acidobact Acidobacteria_Gp1                   | 0 | 0 | 1 | 3 | 0 | 0 | 0 | 0 | 1 | 1 | 0 | 0 | 6 |
| Cluster16869 Proteobac Alphap Rhod Acetobacteraceae        | 0 | 1 | 0 | 1 | 0 | 0 | 0 | 1 | 0 | 2 | 1 | 0 | 6 |
| Cluster16956 Acidobact Acidobacteria_Gp2 Gp2               | 1 | 0 | 0 | 0 | 1 | 0 | 0 | 0 | 2 | 1 | 1 | 0 | 6 |
| Cluster17246 Acidobact Acidobacteria_Gp1 Gp1               | 0 | 0 | 0 | 0 | 2 | 3 | 0 | 0 | 0 | 0 | 1 | 0 | 6 |
| Cluster17487 Acidobact Acidobacteria_Gp1 Gp1               | 0 | 1 | 0 | 0 | 2 | 0 | 0 | 3 | 0 | 0 | 0 | 0 | 6 |
| Cluster17554 Proteobac Alphap Rhizobiales                  | 0 | 0 | 1 | 0 | 0 | 0 | 0 | 1 | 0 | 4 | 0 | 0 | 6 |
| Cluster17752 Acidobact Acidobacteria_Gp3 Gp3               | 0 | 0 | 1 | 1 | 0 | 0 | 0 | 1 | 0 | 1 | 2 | 0 | 6 |
| Cluster17809 Acidobact Acidobacteria_Gp2 Gp2               | 0 | 0 | 0 | 0 | 0 | 0 | 0 | 1 | 0 | 0 | 2 | 3 | 6 |
| Cluster17812 Acidobact Acidobacteria_Gp2 Gp2               | 1 | 0 | 1 | 1 | 1 | 0 | 0 | 1 | 0 | 0 | 1 | 0 | 6 |
| Cluster18115 Acidobact Acidobacteria_Gp2 Gp2               | 0 | 0 | 0 | 0 | 4 | 0 | 0 | 2 | 0 | 0 | 0 | 0 | 6 |
| Cluster18153 Acidobact Acidobacteria_Gp3 Gp3               | 0 | 0 | 0 | 1 | 1 | 1 | 1 | 0 | 1 | 0 | 1 | 0 | 6 |



|                      |               |                   |                 |                  |                |   |   |   |   |   |   |   |   |   |   |   |   |   |
|----------------------|---------------|-------------------|-----------------|------------------|----------------|---|---|---|---|---|---|---|---|---|---|---|---|---|
| Cluster18537         | Acidobact     | Acidobacteria_Gp3 | Gp3             | 0                | 1              | 1 | 0 | 0 | 1 | 0 | 0 | 1 | 0 | 0 | 2 | 6 |   |   |
| Cluster18582         | Proteobac     | Alphap            | Alphaproteok    | Rhizomicrobiu    | 0              | 0 | 0 | 1 | 0 | 1 | 0 | 1 | 1 | 2 | 0 | 0 | 6 |   |
| Cluster18611         | Actinobac     | Actinobacteria    |                 | 3                | 0              | 0 | 0 | 2 | 0 | 1 | 0 | 0 | 0 | 0 | 0 | 6 |   |   |
| Cluster18948         | Actinobac     | Actinol           | Acidi           | Acidimii         | Aciditerrimona | 0 | 0 | 0 | 1 | 1 | 0 | 0 | 1 | 1 | 2 | 0 | 0 | 6 |
| Cluster19477         | Acidobact     | Acidobacteria_Gp2 | Gp2             | 0                | 2              | 0 | 0 | 1 | 0 | 3 | 0 | 0 | 0 | 0 | 0 | 0 | 6 |   |
| Cluster19520         | Acidobact     | Acidobacteria_Gp2 | Gp2             | 0                | 4              | 0 | 1 | 1 | 0 | 0 | 0 | 0 | 0 | 0 | 0 | 0 | 6 |   |
| Cluster20220         | Acidobacteria |                   |                 | 2                | 0              | 0 | 2 | 2 | 0 | 0 | 0 | 0 | 0 | 0 | 0 | 0 | 6 |   |
| Cluster20244         | Acidobact     | Acidobacteria_Gp3 | Gp3             | 0                | 0              | 0 | 0 | 0 | 2 | 1 | 0 | 0 | 0 | 0 | 0 | 3 | 6 |   |
| Cluster20370         | Acidobacteria |                   |                 | 3                | 0              | 0 | 0 | 1 | 0 | 2 | 0 | 0 | 0 | 0 | 0 | 0 | 6 |   |
| Cluster20571         | Proteobac     | Gamm              | Xanthomonadales | 1                | 1              | 1 | 3 | 0 | 0 | 0 | 0 | 0 | 0 | 0 | 0 | 0 | 6 |   |
| Cluster20836         | Acidobact     | Acidobacteria_Gp3 | Gp3             | 2                | 2              | 0 | 0 | 0 | 0 | 2 | 0 | 0 | 0 | 0 | 0 | 0 | 6 |   |
| Cluster20914         | Bacteroid     | Sphing            | Sphir           | Sphingo          | Mucilaginibact | 1 | 0 | 0 | 0 | 1 | 0 | 2 | 1 | 0 | 1 | 0 | 0 | 6 |
| Cluster21800         | Proteobac     | Alphap            | Rhod            | Acetobacteraceae | 0              | 1 | 1 | 0 | 1 | 1 | 0 | 0 | 0 | 2 | 0 | 0 | 6 |   |
| Cluster21931         | Acidobact     | Acidobacteria_Gp1 |                 | 1                | 1              | 0 | 1 | 1 | 1 | 0 | 1 | 0 | 0 | 0 | 0 | 0 | 6 |   |
| Cluster22240         | Actinobac     | Actinol           | Actin           | Catenul          | Catenulispora  | 0 | 0 | 0 | 0 | 0 | 0 | 1 | 4 | 0 | 0 | 0 | 1 | 6 |
| Cluster23733;size=39 |               |                   |                 | 1                | 0              | 0 | 0 | 0 | 2 | 0 | 1 | 2 | 0 | 0 | 0 | 0 | 6 |   |
| Cluster24905         | Acidobact     | Acidobacteria_Gp2 | Gp2             | 0                | 0              | 0 | 2 | 0 | 0 | 1 | 0 | 1 | 0 | 2 | 0 | 0 | 6 |   |
| Cluster25269         | Bacteroid     | Sphing            | Sphir           | Chitinophagaceae | 0              | 1 | 0 | 0 | 1 | 0 | 1 | 3 | 0 | 0 | 0 | 0 | 6 |   |
| Cluster25973         | Actinobac     | Actinol           | Actinomycetales | 0                | 0              | 1 | 2 | 0 | 0 | 1 | 1 | 0 | 0 | 1 | 0 | 0 | 6 |   |
| Cluster27174         | Bacteroid     | Sphing            | Sphir           | Chitinophagaceae | 0              | 1 | 0 | 0 | 0 | 2 | 2 | 0 | 1 | 0 | 0 | 0 | 6 |   |
| Cluster27979         | Proteobac     | Gamm              | Xanthomonadales | 0                | 1              | 0 | 2 | 1 | 0 | 0 | 1 | 0 | 1 | 0 | 0 | 0 | 6 |   |
| Cluster28933         | Bacteroid     | Sphing            | Sphir           | Sphingo          | Mucilaginibact | 0 | 0 | 1 | 2 | 0 | 1 | 0 | 0 | 1 | 0 | 0 | 1 | 6 |
| Cluster28939         | Bacteroid     | Sphing            | Sphir           | Sphingo          | Mucilaginibact | 0 | 0 | 0 | 0 | 2 | 2 | 0 | 1 | 1 | 0 | 0 | 0 | 6 |
| Cluster0;size=46     |               |                   |                 | 1                | 0              | 2 | 0 | 0 | 1 | 0 | 0 | 1 | 0 | 0 | 0 | 0 | 5 |   |
| Cluster39;size=      | Acidobact     | Acidobacteria_Gp2 | Gp2             | 1                | 3              | 1 | 0 | 0 | 0 | 0 | 0 | 0 | 0 | 0 | 0 | 0 | 5 |   |
| Cluster77;size=      | TM7           |                   | TM7_genera_i    | 0                | 1              | 0 | 0 | 0 | 0 | 1 | 1 | 0 | 1 | 1 | 0 | 0 | 5 |   |
| Cluster94;size=      | Proteobac     | Alphap            | Rhizobiales     | 0                | 3              | 0 | 0 | 0 | 0 | 0 | 0 | 2 | 0 | 0 | 0 | 0 | 5 |   |
| Cluster98;size=      | Acidobact     | Acidobacteria_Gp2 | Gp2             | 0                | 1              | 1 | 1 | 0 | 1 | 0 | 1 | 0 | 0 | 0 | 0 | 0 | 5 |   |
| Cluster162;size=     | Acidobact     | Acidobacteria_Gp1 |                 | 1                | 1              | 0 | 0 | 0 | 2 | 0 | 0 | 0 | 0 | 0 | 1 | 0 | 5 |   |

|                                                           |   |   |   |   |   |   |   |   |   |   |   |   |   |
|-----------------------------------------------------------|---|---|---|---|---|---|---|---|---|---|---|---|---|
| Cluster164;si Acidobact Acidobacteria_Gp1                 | 0 | 0 | 0 | 1 | 1 | 0 | 0 | 1 | 0 | 2 | 0 | 0 | 5 |
| Cluster207;si Proteobac Alphap Rhodospirillales           | 0 | 0 | 1 | 0 | 1 | 1 | 0 | 0 | 1 | 0 | 1 | 0 | 5 |
| Cluster246;si Verrucom Spartobacteria Spartobacteria      | 0 | 0 | 0 | 0 | 0 | 0 | 0 | 2 | 2 | 0 | 1 | 0 | 5 |
| Cluster267;si Acidobact Acidobacteria_Gp3                 | 0 | 3 | 0 | 0 | 0 | 0 | 0 | 0 | 0 | 1 | 0 | 1 | 5 |
| Cluster309;size=23                                        | 0 | 1 | 0 | 0 | 1 | 1 | 1 | 0 | 0 | 1 | 0 | 0 | 5 |
| Cluster368;si Chlamydi: Chlamy Chlar Parachlamydiaceae    | 1 | 0 | 0 | 1 | 0 | 0 | 0 | 0 | 0 | 3 | 0 | 0 | 5 |
| Cluster392;si Proteobac Alphap Rhodospirillales           | 1 | 0 | 1 | 0 | 0 | 0 | 0 | 1 | 0 | 1 | 1 | 0 | 5 |
| Cluster400;size=16                                        | 0 | 4 | 0 | 0 | 0 | 0 | 0 | 0 | 0 | 0 | 0 | 1 | 5 |
| Cluster452;si Proteobac Betapr Burkl Burkhol Burkholderia | 1 | 0 | 0 | 0 | 1 | 0 | 1 | 0 | 0 | 0 | 2 | 0 | 5 |
| Cluster453;si Acidobact Acidobacteria_Gp5 Gp5             | 1 | 0 | 0 | 1 | 0 | 0 | 0 | 0 | 0 | 2 | 1 | 0 | 5 |
| Cluster571;si Verrucom Opitutae                           | 3 | 0 | 0 | 0 | 0 | 1 | 0 | 0 | 1 | 0 | 0 | 0 | 5 |
| Cluster619;si Acidobact Acidobacteria_Gp1 Gp1             | 0 | 0 | 0 | 0 | 0 | 1 | 1 | 1 | 1 | 0 | 0 | 1 | 5 |
| Cluster665;size=31                                        | 2 | 0 | 0 | 1 | 2 | 0 | 0 | 0 | 0 | 0 | 0 | 0 | 5 |
| Cluster713;size=18                                        | 0 | 0 | 0 | 0 | 3 | 1 | 0 | 0 | 1 | 0 | 0 | 0 | 5 |
| Cluster747;si Proteobac Alphap Rhizc Xanthol Pseudolabrys | 0 | 0 | 1 | 1 | 0 | 3 | 0 | 0 | 0 | 0 | 0 | 0 | 5 |
| Cluster764;si Chlamydi: Chlamy Chlamydiales               | 0 | 0 | 0 | 1 | 0 | 0 | 1 | 1 | 0 | 0 | 2 | 0 | 5 |
| Cluster767;size=37                                        | 1 | 0 | 1 | 0 | 0 | 2 | 1 | 0 | 0 | 0 | 0 | 0 | 5 |
| Cluster774;si Acidobact Acidobacteria_Gp1 Terriglobus     | 0 | 1 | 0 | 1 | 2 | 0 | 0 | 0 | 0 | 1 | 0 | 0 | 5 |
| Cluster775;si Acidobact Acidobacteria_Gp1 Gp1             | 0 | 0 | 0 | 0 | 0 | 1 | 1 | 1 | 1 | 1 | 0 | 0 | 5 |
| Cluster895;si Acidobact Acidobacteria_Gp1                 | 1 | 0 | 0 | 0 | 1 | 1 | 0 | 0 | 1 | 0 | 1 | 0 | 5 |
| Cluster941;si Acidobact Acidobacteria_Gp3 Gp3             | 1 | 0 | 0 | 1 | 0 | 0 | 0 | 1 | 0 | 0 | 2 | 0 | 5 |
| Cluster961;si Proteobac Alphap Rhizobiales                | 0 | 0 | 2 | 1 | 0 | 0 | 0 | 0 | 0 | 0 | 1 | 1 | 5 |
| Cluster1016; Bacteroid Sphing Sphir Chitinophagaceae      | 1 | 2 | 0 | 0 | 0 | 0 | 0 | 0 | 0 | 1 | 0 | 1 | 5 |
| Cluster1063; Actinobac Actinol Acidimicrobiales           | 1 | 0 | 0 | 0 | 1 | 1 | 2 | 0 | 0 | 0 | 0 | 0 | 5 |
| Cluster1094; Acidobacteria                                | 0 | 3 | 0 | 0 | 0 | 0 | 1 | 0 | 1 | 0 | 0 | 0 | 5 |
| Cluster1095; Proteobacteria                               | 1 | 0 | 1 | 2 | 0 | 0 | 0 | 0 | 0 | 0 | 0 | 1 | 5 |
| Cluster1097; Acidobact Acidobacteria_Gp1                  | 1 | 2 | 0 | 0 | 0 | 1 | 0 | 0 | 1 | 0 | 0 | 0 | 5 |
| Cluster1145; Bacteroid Sphing Sphir Chitinophagaceae      | 1 | 0 | 2 | 0 | 1 | 1 | 0 | 0 | 0 | 0 | 0 | 0 | 5 |
| Cluster1147; Proteobac Betapr Burkholderiales             | 0 | 0 | 1 | 0 | 0 | 0 | 0 | 1 | 0 | 2 | 0 | 1 | 5 |

|                                                          |   |   |   |   |   |   |   |   |   |   |   |   |   |
|----------------------------------------------------------|---|---|---|---|---|---|---|---|---|---|---|---|---|
| Cluster1156; Acidobact Acidobacteria_Gp2 Gp2             | 0 | 0 | 1 | 0 | 0 | 0 | 1 | 1 | 2 | 0 | 0 | 0 | 5 |
| Cluster1195; Proteobac Alphap Rhodospirillales           | 0 | 0 | 0 | 0 | 0 | 0 | 0 | 0 | 0 | 5 | 0 | 0 | 5 |
| Cluster1287; Acidobact Acidobacteria_Gp1 Gp1             | 0 | 0 | 0 | 0 | 0 | 1 | 0 | 1 | 1 | 0 | 1 | 1 | 5 |
| Cluster1342; Bacteroid Sphing Sphir Chitinophagaceae     | 2 | 0 | 0 | 0 | 1 | 1 | 1 | 0 | 0 | 0 | 0 | 0 | 5 |
| Cluster1353; Acidobact Acidobacteria_Gp1 Gp1             | 1 | 0 | 0 | 0 | 2 | 0 | 1 | 0 | 0 | 0 | 1 | 0 | 5 |
| Cluster1429; Acidobact Acidobacteria_Gp3                 | 1 | 0 | 0 | 0 | 1 | 1 | 0 | 0 | 1 | 1 | 0 | 0 | 5 |
| Cluster1563; Proteobac Betapr Burkl Oxalobacteraceae     | 0 | 1 | 0 | 0 | 0 | 1 | 0 | 1 | 0 | 0 | 1 | 1 | 5 |
| Cluster1564; Acidobact Acidobacteria_Gp1 Gp1             | 1 | 0 | 2 | 0 | 0 | 1 | 0 | 0 | 0 | 0 | 1 | 0 | 5 |
| Cluster1570; Bacteroid Sphing Sphir Chitinophagaceae     | 0 | 0 | 1 | 0 | 0 | 0 | 0 | 1 | 1 | 2 | 0 | 0 | 5 |
| Cluster1674; size=13                                     | 0 | 2 | 0 | 0 | 0 | 0 | 0 | 0 | 0 | 2 | 0 | 1 | 5 |
| Cluster1728; Acidobact Acidobacteria_Gp1 Gp1             | 0 | 0 | 2 | 0 | 0 | 1 | 0 | 0 | 0 | 1 | 1 | 0 | 5 |
| Cluster1780; Acidobact Acidobacteria_Gp2 Gp2             | 1 | 1 | 0 | 0 | 0 | 1 | 1 | 0 | 1 | 0 | 0 | 0 | 5 |
| Cluster1830; Verrucom Opitut; Opitu Opituta Opitutus     | 0 | 2 | 0 | 0 | 0 | 0 | 0 | 0 | 0 | 2 | 0 | 1 | 5 |
| Cluster1907; Proteobac Alphap Alphaproteob Rhizomicrobiu | 0 | 3 | 0 | 0 | 0 | 0 | 1 | 0 | 0 | 0 | 0 | 1 | 5 |
| Cluster1934; Acidobact Acidobacteria_Gp1 Acidobacteriur  | 2 | 0 | 1 | 1 | 0 | 0 | 0 | 0 | 0 | 0 | 0 | 1 | 5 |
| Cluster1946; Planctom Planct Planct Planctomyces         | 0 | 0 | 0 | 0 | 1 | 0 | 1 | 1 | 0 | 0 | 2 | 0 | 5 |
| Cluster2053; size=40                                     | 0 | 2 | 0 | 0 | 0 | 0 | 1 | 1 | 0 | 0 | 1 | 0 | 5 |
| Cluster2103; Acidobact Acidobacteria_Gp1 Gp1             | 0 | 1 | 1 | 0 | 0 | 0 | 1 | 0 | 1 | 1 | 0 | 0 | 5 |
| Cluster2128; Actinobac Actinol Actinomycetales           | 0 | 0 | 0 | 0 | 0 | 1 | 0 | 2 | 2 | 0 | 0 | 0 | 5 |
| Cluster2134; Actinobac Actinol Actin Pseudonocardiaceae  | 0 | 0 | 0 | 0 | 0 | 0 | 0 | 2 | 0 | 0 | 0 | 3 | 5 |
| Cluster2237; Acidobact Acidobacteria_Gp2 Gp2             | 0 | 0 | 0 | 0 | 2 | 0 | 0 | 0 | 2 | 1 | 0 | 0 | 5 |
| Cluster2257; Acidobact Acidobacteria_Gp2 Gp2             | 0 | 0 | 0 | 2 | 1 | 0 | 1 | 0 | 0 | 0 | 0 | 1 | 5 |
| Cluster2388; Proteobac Alphap Caulc Caulobacteraceae     | 1 | 1 | 0 | 0 | 1 | 0 | 1 | 0 | 0 | 1 | 0 | 0 | 5 |
| Cluster2658; Proteobac Alphaproteobacteria               | 1 | 0 | 0 | 0 | 0 | 1 | 0 | 3 | 0 | 0 | 0 | 0 | 5 |
| Cluster2697; Acidobact Acidobacteria_Gp2 Gp2             | 1 | 0 | 0 | 1 | 2 | 1 | 0 | 0 | 0 | 0 | 0 | 0 | 5 |
| Cluster2768; Acidobact Acidobacteria_Gp1 Gp1             | 1 | 0 | 0 | 1 | 0 | 0 | 0 | 1 | 0 | 1 | 0 | 1 | 5 |
| Cluster2810; Bacteroid Sphing Sphir Chitinophagaceae     | 0 | 0 | 2 | 1 | 1 | 0 | 0 | 0 | 0 | 1 | 0 | 0 | 5 |
| Cluster3006; Acidobact Acidobacteria_Gp1                 | 1 | 0 | 2 | 0 | 1 | 0 | 0 | 1 | 0 | 0 | 0 | 0 | 5 |
| Cluster3016; Acidobact Acidobacteria_Gp2 Gp2             | 0 | 0 | 0 | 1 | 1 | 0 | 1 | 0 | 1 | 0 | 0 | 1 | 5 |

|                                                            |   |   |   |   |   |   |   |   |   |   |   |   |   |
|------------------------------------------------------------|---|---|---|---|---|---|---|---|---|---|---|---|---|
| Cluster3088; Acidobact Acidobacteria_Gp1 Gp1               | 0 | 0 | 1 | 0 | 0 | 1 | 2 | 1 | 0 | 0 | 0 | 0 | 5 |
| Cluster3128; Acidobact Acidobacteria_Gp1 Edaphobacter      | 0 | 0 | 1 | 0 | 0 | 1 | 0 | 1 | 1 | 0 | 0 | 1 | 5 |
| Cluster3140; Proteobac Betapr Burkholderia                 | 0 | 0 | 0 | 2 | 3 | 0 | 0 | 0 | 0 | 0 | 0 | 0 | 5 |
| Cluster3180; Planctom Planct Planctomycetaceae             | 0 | 1 | 2 | 0 | 1 | 1 | 0 | 0 | 0 | 0 | 0 | 0 | 5 |
| Cluster3407; Acidobact Acidobacteria_Gp2 Gp2               | 0 | 0 | 0 | 1 | 1 | 0 | 1 | 1 | 0 | 0 | 1 | 0 | 5 |
| Cluster3437; Acidobacteria                                 | 0 | 1 | 0 | 0 | 1 | 0 | 1 | 0 | 0 | 0 | 1 | 1 | 5 |
| Cluster3472; Acidobact Acidobacteria_Gp2 Gp2               | 1 | 0 | 0 | 1 | 0 | 0 | 1 | 0 | 0 | 1 | 0 | 1 | 5 |
| Cluster3574; Acidobact Acidobacteria_Gp1                   | 0 | 1 | 0 | 1 | 0 | 0 | 1 | 0 | 1 | 1 | 0 | 0 | 5 |
| Cluster3690; size=14                                       | 0 | 0 | 0 | 2 | 1 | 1 | 1 | 0 | 0 | 0 | 0 | 0 | 5 |
| Cluster3705; Bacteroid Sphing Sphir Chitinophagaceae       | 2 | 0 | 1 | 0 | 1 | 0 | 0 | 0 | 1 | 0 | 0 | 0 | 5 |
| Cluster3746; Proteobac Alphap Rhod Acetob Acidisphaera     | 0 | 0 | 0 | 2 | 0 | 1 | 1 | 0 | 0 | 0 | 1 | 0 | 5 |
| Cluster4014; Bacteroid Sphing Sphir Chitinophagaceae       | 1 | 0 | 1 | 0 | 1 | 1 | 0 | 1 | 0 | 0 | 0 | 0 | 5 |
| Cluster4033; Acidobact Acidobacteria_Gp2 Gp2               | 0 | 0 | 0 | 0 | 0 | 0 | 0 | 1 | 2 | 0 | 1 | 1 | 5 |
| Cluster4289; Proteobac Alphap Rhod Rhodospirillaceae       | 0 | 1 | 0 | 0 | 1 | 0 | 0 | 1 | 0 | 1 | 0 | 1 | 5 |
| Cluster4321; Proteobac Alphap Rhizc Bradyrh Bradyrhizobiur | 1 | 0 | 0 | 0 | 1 | 0 | 0 | 0 | 0 | 1 | 1 | 1 | 5 |
| Cluster4327; Actinobac Actinol Actinomycetales             | 0 | 0 | 1 | 0 | 1 | 0 | 0 | 0 | 1 | 1 | 0 | 1 | 5 |
| Cluster4404; Proteobac Deltap Myxc Polyangiaceae           | 0 | 1 | 0 | 0 | 0 | 1 | 1 | 0 | 0 | 1 | 1 | 0 | 5 |
| Cluster4785; Proteobac Gamm Legio Coxiella Aquicella       | 0 | 0 | 3 | 1 | 0 | 0 | 0 | 0 | 0 | 0 | 1 | 0 | 5 |
| Cluster4826; size=33                                       | 0 | 0 | 2 | 2 | 0 | 1 | 0 | 0 | 0 | 0 | 0 | 0 | 5 |
| Cluster5681; Bacteroid Sphing Sphir Sphingo Mucilaginibact | 0 | 0 | 0 | 1 | 0 | 0 | 0 | 2 | 0 | 0 | 2 | 0 | 5 |
| Cluster5697; size=21                                       | 1 | 0 | 0 | 0 | 4 | 0 | 0 | 0 | 0 | 0 | 0 | 0 | 5 |
| Cluster5704; Acidobact Acidobacteria_Gp1                   | 0 | 0 | 0 | 0 | 1 | 0 | 0 | 1 | 3 | 0 | 0 | 0 | 5 |
| Cluster5828; Bacteroid Sphing Sphir Sphingo Mucilaginibact | 0 | 0 | 0 | 0 | 0 | 1 | 0 | 2 | 2 | 0 | 0 | 0 | 5 |
| Cluster6373; Acidobact Acidobacteria_Gp3 Gp3               | 1 | 0 | 1 | 0 | 1 | 1 | 0 | 0 | 0 | 0 | 1 | 0 | 5 |
| Cluster6749; Verrucom Opitut; Opitut; Opituta Opitutus     | 2 | 0 | 0 | 0 | 0 | 2 | 0 | 0 | 1 | 0 | 0 | 0 | 5 |
| Cluster6945; Proteobac Alphap Rhodospirillales             | 3 | 0 | 0 | 0 | 0 | 0 | 0 | 1 | 1 | 0 | 0 | 0 | 5 |
| Cluster7029; Acidobact Acidobacteria_Gp5 Gp5               | 1 | 0 | 0 | 1 | 0 | 0 | 1 | 0 | 0 | 1 | 1 | 0 | 5 |
| Cluster7173; Proteobac Alphap Rhodospirillales             | 0 | 1 | 0 | 1 | 0 | 0 | 0 | 0 | 0 | 3 | 0 | 0 | 5 |
| Cluster7198; Proteobac Alphaproteobacteria                 | 0 | 0 | 3 | 0 | 1 | 1 | 0 | 0 | 0 | 0 | 0 | 0 | 5 |

|                                                          |   |   |   |   |   |   |   |   |   |   |   |   |   |
|----------------------------------------------------------|---|---|---|---|---|---|---|---|---|---|---|---|---|
| Cluster7320; Gemmatir Gemm Gemı Gemma Gemmatimonas       | 1 | 0 | 0 | 0 | 3 | 0 | 0 | 0 | 0 | 0 | 1 | 0 | 5 |
| Cluster7464; Verrucom Spartobacteria Spartobacteria      | 1 | 1 | 0 | 0 | 0 | 0 | 1 | 1 | 0 | 0 | 0 | 1 | 5 |
| Cluster7662; Acidobact Acidobacteria_Gp3 Gp3             | 2 | 0 | 0 | 0 | 1 | 0 | 0 | 0 | 0 | 2 | 0 | 0 | 5 |
| Cluster7674; Firmicutes                                  | 0 | 2 | 0 | 0 | 0 | 0 | 1 | 0 | 0 | 0 | 0 | 2 | 5 |
| Cluster7722; Verrucom Opitut; Opitu Opituta Opitutus     | 1 | 0 | 0 | 0 | 0 | 4 | 0 | 0 | 0 | 0 | 0 | 0 | 5 |
| Cluster7803; Proteobac Alphap Rhod Acetobacteraceae      | 0 | 0 | 1 | 0 | 0 | 1 | 0 | 2 | 0 | 0 | 1 | 0 | 5 |
| Cluster7895; Proteobac Deltap Myxococcales               | 0 | 1 | 1 | 0 | 0 | 1 | 0 | 1 | 0 | 0 | 0 | 1 | 5 |
| Cluster8022;size=32                                      | 2 | 0 | 0 | 0 | 0 | 1 | 1 | 0 | 0 | 0 | 1 | 0 | 5 |
| Cluster8023; Proteobac Alphap Rhodospirillales           | 1 | 0 | 0 | 0 | 0 | 1 | 0 | 0 | 0 | 1 | 2 | 0 | 5 |
| Cluster8325;size=9                                       | 0 | 1 | 0 | 0 | 0 | 0 | 0 | 1 | 1 | 0 | 2 | 0 | 5 |
| Cluster8522; Acidobact Acidobacteria_Gp3 Gp3             | 0 | 0 | 0 | 0 | 0 | 0 | 3 | 0 | 0 | 0 | 1 | 1 | 5 |
| Cluster8587; Verrucom Subdivision3 Subdivision3_ξ        | 2 | 1 | 0 | 0 | 1 | 0 | 0 | 0 | 1 | 0 | 0 | 0 | 5 |
| Cluster8628; Acidobact Acidobacteria_Gp2 Gp2             | 1 | 0 | 0 | 0 | 1 | 0 | 0 | 0 | 1 | 1 | 1 | 0 | 5 |
| Cluster8784; Acidobact Acidobacteria_Gp2 Gp2             | 1 | 1 | 0 | 0 | 0 | 2 | 1 | 0 | 0 | 0 | 0 | 0 | 5 |
| Cluster8944;size=31                                      | 0 | 0 | 0 | 1 | 0 | 0 | 2 | 2 | 0 | 0 | 0 | 0 | 5 |
| Cluster9121; Proteobac Alphaproteobacteria               | 0 | 2 | 0 | 0 | 0 | 0 | 0 | 1 | 0 | 0 | 0 | 2 | 5 |
| Cluster9217; Acidobact Acidobacteria_Gp3                 | 0 | 0 | 0 | 0 | 0 | 0 | 1 | 2 | 2 | 0 | 0 | 0 | 5 |
| Cluster9373; Proteobac Alphap Rhod Rhodospirillaceae     | 3 | 0 | 0 | 0 | 0 | 0 | 0 | 2 | 0 | 0 | 0 | 0 | 5 |
| Cluster9906; Acidobact Acidobacteria_Gp1 Granulicella    | 0 | 0 | 1 | 1 | 0 | 1 | 0 | 1 | 1 | 0 | 0 | 0 | 5 |
| Cluster10612 Proteobac Alphap Caulc Caulobac Caulobacter | 0 | 0 | 2 | 0 | 0 | 0 | 0 | 0 | 0 | 1 | 2 | 0 | 5 |
| Cluster10824 Proteobac Betapr Burkl Burkhol Burkholderia | 0 | 1 | 0 | 1 | 0 | 0 | 0 | 0 | 0 | 1 | 1 | 1 | 5 |
| Cluster11024 Acidobact Acidobacteria_Gp3 Gp3             | 0 | 0 | 0 | 0 | 0 | 0 | 0 | 0 | 2 | 0 | 3 | 0 | 5 |
| Cluster11521 Acidobact Acidobacteria_Gp5 Gp5             | 0 | 2 | 0 | 0 | 0 | 1 | 1 | 0 | 0 | 0 | 0 | 1 | 5 |
| Cluster11672 Acidobact Acidobacteria_Gp1                 | 0 | 1 | 2 | 0 | 0 | 0 | 1 | 0 | 0 | 0 | 1 | 0 | 5 |
| Cluster12086 Proteobac Gamm Xantı Sinobac Steroidobacter | 0 | 0 | 0 | 1 | 0 | 1 | 2 | 0 | 1 | 0 | 0 | 0 | 5 |
| Cluster12219 Proteobac Alphap Alphaproteot Rhizomicrobiu | 0 | 0 | 0 | 0 | 0 | 1 | 0 | 0 | 4 | 0 | 0 | 0 | 5 |
| Cluster12222 Acidobact Acidobacteria_Gp1 Gp1             | 1 | 0 | 0 | 0 | 0 | 0 | 1 | 0 | 0 | 1 | 2 | 0 | 5 |
| Cluster12836 Proteobac Deltaproteobacteria               | 0 | 0 | 2 | 1 | 0 | 0 | 1 | 0 | 1 | 0 | 0 | 0 | 5 |
| Cluster12915 Acidobact Acidobacteria_Gp2 Gp2             | 0 | 0 | 3 | 1 | 0 | 0 | 0 | 0 | 0 | 0 | 1 | 0 | 5 |



|                                                             |   |   |   |   |   |   |   |   |   |   |   |   |   |
|-------------------------------------------------------------|---|---|---|---|---|---|---|---|---|---|---|---|---|
| Cluster21603;size=26                                        | 0 | 0 | 1 | 1 | 0 | 0 | 0 | 1 | 1 | 0 | 0 | 1 | 5 |
| Cluster21671 Proteobac Alphap Rhod Acetobacteraceae         | 0 | 0 | 0 | 0 | 0 | 0 | 0 | 1 | 0 | 1 | 3 | 0 | 5 |
| Cluster21724 Acidobacteria                                  | 0 | 0 | 1 | 0 | 0 | 0 | 2 | 0 | 0 | 0 | 2 | 0 | 5 |
| Cluster22037 Acidobact Acidobacteria_Gp3 Gp3                | 2 | 0 | 1 | 0 | 0 | 0 | 0 | 1 | 0 | 1 | 0 | 0 | 5 |
| Cluster22107;size=17                                        | 0 | 0 | 0 | 1 | 0 | 0 | 3 | 0 | 1 | 0 | 0 | 0 | 5 |
| Cluster22165 Proteobac Deltaproteobacteria                  | 1 | 1 | 0 | 0 | 1 | 0 | 1 | 0 | 1 | 0 | 0 | 0 | 5 |
| Cluster22443 Actinobac Actinol Actinomycetales              | 0 | 1 | 1 | 1 | 0 | 0 | 1 | 0 | 0 | 0 | 1 | 0 | 5 |
| Cluster22792 Proteobac Alphap Caulc Caulobacteraceae        | 0 | 0 | 2 | 1 | 0 | 0 | 0 | 0 | 0 | 0 | 2 | 0 | 5 |
| Cluster22974 Proteobac Gamm Xanthomonadales                 | 0 | 0 | 2 | 0 | 0 | 0 | 1 | 0 | 0 | 1 | 1 | 0 | 5 |
| Cluster23066 Bacteroid Sphing Sphir Chitinophagaceae        | 0 | 0 | 0 | 2 | 0 | 1 | 1 | 0 | 0 | 1 | 0 | 0 | 5 |
| Cluster23438 Actinobac Actinol Actinomycetales              | 0 | 1 | 0 | 0 | 0 | 0 | 2 | 0 | 0 | 0 | 2 | 0 | 5 |
| Cluster24477 Bacteroid Sphing Sphir Chitinophagaceae        | 1 | 0 | 0 | 0 | 2 | 0 | 0 | 1 | 0 | 0 | 1 | 0 | 5 |
| Cluster24510 Bacteroid Sphing Sphir Chitinophagaceae        | 0 | 0 | 1 | 0 | 1 | 0 | 0 | 3 | 0 | 0 | 0 | 0 | 5 |
| Cluster24514 Acidobact Acidobacteria_Gp1 Gp1                | 0 | 0 | 0 | 0 | 0 | 1 | 1 | 1 | 1 | 1 | 0 | 0 | 5 |
| Cluster24681 Proteobac Alphap Alphaproteob Rhizomicrobiu    | 2 | 1 | 1 | 1 | 0 | 0 | 0 | 0 | 0 | 0 | 0 | 0 | 5 |
| Cluster24840 Acidobact Acidobacteria_Gp13 Gp13              | 0 | 2 | 0 | 0 | 0 | 0 | 1 | 1 | 0 | 0 | 0 | 1 | 5 |
| Cluster25065 Actinobac Actinobacteria                       | 0 | 2 | 0 | 0 | 1 | 0 | 1 | 0 | 1 | 0 | 0 | 0 | 5 |
| Cluster25407 Acidobact Acidobacteria_Gp2 Gp2                | 1 | 0 | 0 | 0 | 0 | 0 | 1 | 1 | 1 | 0 | 1 | 0 | 5 |
| Cluster25736 Actinobac Actinol Acidi Acidimii Aciditerrimon | 1 | 0 | 1 | 0 | 0 | 0 | 0 | 0 | 0 | 1 | 2 | 0 | 5 |
| Cluster25779 Bacteroid Sphing Sphir Chitinophagaceae        | 0 | 0 | 0 | 0 | 1 | 1 | 0 | 1 | 0 | 2 | 0 | 0 | 5 |
| Cluster26115 Proteobac Alphaproteobacteria                  | 1 | 0 | 1 | 0 | 0 | 1 | 0 | 0 | 2 | 0 | 0 | 0 | 5 |
| Cluster26926 Actinobac Actinol Actinomycetales              | 0 | 0 | 0 | 0 | 0 | 0 | 1 | 2 | 0 | 1 | 0 | 1 | 5 |
| Cluster26986 Bacteroid Sphing Sphir Chitinophagaceae        | 0 | 0 | 0 | 1 | 0 | 0 | 0 | 0 | 0 | 2 | 2 | 0 | 5 |
| Cluster27080 Acidobacteria                                  | 0 | 0 | 0 | 0 | 0 | 0 | 0 | 1 | 3 | 0 | 1 | 0 | 5 |
| Cluster27365 Actinobac Actinol Acidimicrobiales             | 0 | 1 | 0 | 0 | 1 | 0 | 0 | 0 | 0 | 2 | 0 | 1 | 5 |
| Cluster27637 Bacteroid Sphing Sphir Chitinophagaceae        | 2 | 0 | 0 | 0 | 0 | 1 | 0 | 0 | 0 | 1 | 0 | 1 | 5 |
| Cluster28121 Actinobac Actinol Acidi Acidimii Aciditerrimon | 0 | 1 | 1 | 0 | 0 | 0 | 1 | 1 | 0 | 0 | 0 | 1 | 5 |
| Cluster29289 Bacteroid Bacteroidetes_incert Ohtaekwangia    | 0 | 0 | 0 | 1 | 1 | 0 | 2 | 0 | 1 | 0 | 0 | 0 | 5 |
| Cluster25;size Acidobact Acidobacteria_Gp3 Gp3              | 0 | 1 | 0 | 0 | 1 | 0 | 0 | 0 | 2 | 0 | 0 | 0 | 4 |





|                                                            |   |   |   |   |   |   |   |   |   |   |   |   |   |
|------------------------------------------------------------|---|---|---|---|---|---|---|---|---|---|---|---|---|
| Cluster798;si Acidobact Acidobacteria_Gp1 Edaphobacter     | 0 | 0 | 0 | 0 | 2 | 0 | 0 | 1 | 0 | 1 | 0 | 0 | 4 |
| Cluster869;si Acidobact Acidobacteria_Gp2 Gp2              | 1 | 0 | 0 | 1 | 0 | 0 | 1 | 0 | 1 | 0 | 0 | 0 | 4 |
| Cluster873;si Acidobact Acidobacteria_Gp15 Gp15            | 0 | 0 | 0 | 0 | 0 | 1 | 0 | 0 | 1 | 1 | 1 | 0 | 4 |
| Cluster905;si Proteobacteria                               | 1 | 0 | 0 | 0 | 0 | 0 | 0 | 2 | 1 | 0 | 0 | 0 | 4 |
| Cluster914;si Proteobacteria                               | 0 | 1 | 1 | 0 | 0 | 0 | 0 | 0 | 1 | 1 | 0 | 0 | 4 |
| Cluster928;si Acidobact Acidobacteria_Gp1 Terriglobus      | 0 | 0 | 0 | 1 | 0 | 0 | 0 | 2 | 0 | 1 | 0 | 0 | 4 |
| Cluster951;si Actinobac Actinol Actin Mycoba Mycobacteriur | 0 | 0 | 1 | 1 | 0 | 0 | 0 | 0 | 0 | 0 | 2 | 0 | 4 |
| Cluster990;si Proteobac Alphap Rhod Rhodospirillaceae      | 0 | 1 | 0 | 0 | 0 | 0 | 0 | 2 | 1 | 0 | 0 | 0 | 4 |
| Cluster1040; Proteobac Alphap Sphir Sphingo Sphingomonas   | 2 | 0 | 0 | 0 | 0 | 1 | 0 | 0 | 0 | 0 | 1 | 0 | 4 |
| Cluster1122; Actinobac Actinol Acidi Acidimi Aciditerrimon | 0 | 1 | 0 | 1 | 1 | 1 | 0 | 0 | 0 | 0 | 0 | 0 | 4 |
| Cluster1124; Proteobac Alphap Rhodospirillales             | 0 | 1 | 0 | 0 | 0 | 0 | 0 | 0 | 1 | 0 | 0 | 2 | 4 |
| Cluster1125; Proteobac Alphap Caulc Cauloba Phenylobacter  | 0 | 0 | 0 | 0 | 0 | 0 | 0 | 1 | 1 | 0 | 2 | 0 | 4 |
| Cluster1126;size=15                                        | 0 | 0 | 0 | 0 | 1 | 0 | 1 | 0 | 1 | 0 | 1 | 0 | 4 |
| Cluster1132; Bacteroid Sphing Sphir Chitinophagaceae       | 0 | 0 | 0 | 0 | 2 | 0 | 1 | 1 | 0 | 0 | 0 | 0 | 4 |
| Cluster1265; Acidobact Acidobacteria_Gp2 Gp2               | 0 | 0 | 0 | 0 | 0 | 0 | 1 | 0 | 0 | 3 | 0 | 0 | 4 |
| Cluster1272; Proteobac Alphap Alphaproteok Rhizomicrobiu   | 2 | 0 | 0 | 0 | 0 | 0 | 0 | 0 | 1 | 0 | 1 | 0 | 4 |
| Cluster1282; Acidobact Acidobacteria_Gp2 Gp2               | 0 | 0 | 0 | 1 | 0 | 0 | 1 | 0 | 2 | 0 | 0 | 0 | 4 |
| Cluster1292; Acidobact Acidobacteria_Gp6 Gp6               | 1 | 0 | 2 | 0 | 0 | 1 | 0 | 0 | 0 | 0 | 0 | 0 | 4 |
| Cluster1297; Acidobact Acidobacteria_Gp2 Gp2               | 0 | 0 | 0 | 0 | 0 | 1 | 0 | 0 | 0 | 2 | 1 | 0 | 4 |
| Cluster1308; Proteobac Deltaproteobacteria                 | 0 | 0 | 0 | 0 | 0 | 0 | 1 | 0 | 0 | 0 | 2 | 1 | 4 |
| Cluster1332; Acidobact Acidobacteria_Gp1 Gp1               | 0 | 3 | 0 | 0 | 0 | 0 | 0 | 0 | 1 | 0 | 0 | 0 | 4 |
| Cluster1354; Acidobact Acidobacteria_Gp3 Gp3               | 0 | 0 | 0 | 0 | 2 | 0 | 1 | 0 | 0 | 1 | 0 | 0 | 4 |
| Cluster1356; Acidobact Acidobacteria_Gp3 Gp3               | 0 | 0 | 0 | 2 | 1 | 1 | 0 | 0 | 0 | 0 | 0 | 0 | 4 |
| Cluster1364;size=42                                        | 1 | 0 | 0 | 1 | 0 | 0 | 0 | 1 | 0 | 0 | 1 | 0 | 4 |
| Cluster1373;size=32                                        | 0 | 0 | 0 | 2 | 2 | 0 | 0 | 0 | 0 | 0 | 0 | 0 | 4 |
| Cluster1401; Armatimc Armati Arma Armatin Armatimonas/     | 0 | 0 | 0 | 0 | 0 | 1 | 1 | 0 | 0 | 1 | 1 | 0 | 4 |
| Cluster1415; Acidobact Acidobacteria_Gp1 Gp1               | 1 | 0 | 1 | 0 | 0 | 0 | 0 | 1 | 0 | 1 | 0 | 0 | 4 |
| Cluster1418; Acidobact Acidobacteria_Gp6 Gp6               | 0 | 1 | 1 | 0 | 0 | 0 | 1 | 0 | 1 | 0 | 0 | 0 | 4 |
| Cluster1519; Proteobac Gamm Xantl Sinobac Nevskia          | 0 | 0 | 0 | 1 | 0 | 1 | 0 | 0 | 0 | 2 | 0 | 0 | 4 |

|                                                             |   |   |   |   |   |   |   |   |   |   |   |   |   |
|-------------------------------------------------------------|---|---|---|---|---|---|---|---|---|---|---|---|---|
| Cluster1539; Proteobac Betapr Burkli Oxaloba Janthinobacter | 0 | 0 | 0 | 1 | 0 | 0 | 0 | 0 | 0 | 2 | 1 | 0 | 4 |
| Cluster1556; Acidobact Acidobacteria_Gp3 Gp3                | 0 | 1 | 0 | 0 | 0 | 1 | 1 | 0 | 0 | 0 | 1 | 0 | 4 |
| Cluster1561; Acidobact Acidobacteria_Gp6 Gp6                | 0 | 0 | 1 | 1 | 0 | 1 | 0 | 0 | 1 | 0 | 0 | 0 | 4 |
| Cluster1599; Bacteroid Sphing Sphir Chitino; Chitinophaga   | 0 | 0 | 0 | 0 | 0 | 1 | 0 | 2 | 1 | 0 | 0 | 0 | 4 |
| Cluster1632; Actinobac Actinol Actin Streptomycetaceae      | 0 | 0 | 0 | 0 | 0 | 0 | 0 | 0 | 1 | 3 | 0 | 0 | 4 |
| Cluster1665; Proteobac Alphap Rhod Acetob; Acidisphaera     | 3 | 0 | 0 | 0 | 0 | 1 | 0 | 0 | 0 | 0 | 0 | 0 | 4 |
| Cluster1668; Proteobac Alphap Caulc Caulob; Phenyllobacter  | 0 | 1 | 1 | 0 | 0 | 0 | 0 | 0 | 0 | 2 | 0 | 0 | 4 |
| Cluster1672; Actinobac Actinobacteria                       | 0 | 0 | 0 | 0 | 0 | 1 | 0 | 0 | 1 | 1 | 1 | 0 | 4 |
| Cluster1718; Proteobac Alphaproteobacteria                  | 0 | 0 | 0 | 0 | 0 | 3 | 0 | 1 | 0 | 0 | 0 | 0 | 4 |
| Cluster1766; Acidobact Acidobacteria_Gp3 Gp3                | 0 | 1 | 0 | 0 | 0 | 1 | 0 | 1 | 1 | 0 | 0 | 0 | 4 |
| Cluster1774; Acidobact Acidobacteria_Gp13 Gp13              | 0 | 1 | 0 | 0 | 1 | 0 | 0 | 2 | 0 | 0 | 0 | 0 | 4 |
| Cluster1782; Chloroflexi                                    | 3 | 0 | 0 | 0 | 0 | 1 | 0 | 0 | 0 | 0 | 0 | 0 | 4 |
| Cluster1788; Acidobact Acidobacteria_Gp2 Gp2                | 0 | 0 | 1 | 1 | 0 | 0 | 0 | 1 | 0 | 0 | 1 | 0 | 4 |
| Cluster1838;size=18                                         | 0 | 0 | 2 | 0 | 0 | 0 | 1 | 1 | 0 | 0 | 0 | 0 | 4 |
| Cluster1866; Actinobac Actinol Solirubrobacterales          | 0 | 0 | 2 | 0 | 0 | 0 | 1 | 0 | 0 | 1 | 0 | 0 | 4 |
| Cluster1932; Proteobac Betaproteobacteria                   | 0 | 2 | 0 | 0 | 0 | 0 | 0 | 0 | 0 | 1 | 0 | 1 | 4 |
| Cluster1933; Acidobact Acidobacteria_Gp1 Gp1                | 0 | 0 | 0 | 0 | 2 | 0 | 0 | 0 | 1 | 0 | 1 | 0 | 4 |
| Cluster2009; Acidobact Acidobacteria_Gp3 Gp3                | 1 | 0 | 1 | 0 | 1 | 0 | 0 | 0 | 0 | 1 | 0 | 0 | 4 |
| Cluster2079; Proteobac Alphap Alphaproteok Rhizomicrobiu    | 0 | 0 | 1 | 0 | 0 | 0 | 0 | 1 | 0 | 2 | 0 | 0 | 4 |
| Cluster2094;size=23                                         | 0 | 0 | 0 | 0 | 1 | 1 | 0 | 1 | 1 | 0 | 0 | 0 | 4 |
| Cluster2138; Chlamydi; Chlamy Chlamydiales                  | 2 | 0 | 0 | 2 | 0 | 0 | 0 | 0 | 0 | 0 | 0 | 0 | 4 |
| Cluster2180; Acidobact Acidobacteria_Gp1 Gp1                | 1 | 1 | 0 | 0 | 1 | 0 | 0 | 0 | 1 | 0 | 0 | 0 | 4 |
| Cluster2246; Acidobact Acidobacteria_Gp2 Gp2                | 0 | 1 | 0 | 0 | 0 | 3 | 0 | 0 | 0 | 0 | 0 | 0 | 4 |
| Cluster2262; Acidobact Acidobacteria_Gp10 Gp10              | 0 | 0 | 0 | 1 | 0 | 0 | 0 | 1 | 0 | 1 | 0 | 1 | 4 |
| Cluster2267;size=5                                          | 1 | 0 | 1 | 0 | 0 | 1 | 0 | 0 | 0 | 0 | 1 | 0 | 4 |
| Cluster2312; Proteobac Alphap Rhizc Xantho; Labrys          | 0 | 1 | 0 | 0 | 1 | 0 | 0 | 0 | 0 | 1 | 0 | 1 | 4 |
| Cluster2317; Acidobact Acidobacteria_Gp3                    | 0 | 2 | 0 | 1 | 0 | 0 | 1 | 0 | 0 | 0 | 0 | 0 | 4 |
| Cluster2449; Proteobac Alphap Caulc Caulobacteraceae        | 0 | 0 | 1 | 1 | 0 | 0 | 0 | 0 | 0 | 2 | 0 | 0 | 4 |
| Cluster2592; Acidobact Acidobacteria_Gp1                    | 0 | 0 | 0 | 0 | 1 | 1 | 1 | 0 | 1 | 0 | 0 | 0 | 4 |

|                                                             |   |   |   |   |   |   |   |   |   |   |   |   |
|-------------------------------------------------------------|---|---|---|---|---|---|---|---|---|---|---|---|
| Cluster2612;size=20                                         | 0 | 1 | 0 | 0 | 1 | 1 | 0 | 0 | 0 | 0 | 1 | 4 |
| Cluster2693; Proteobac Betapr Burkl Oxalobæ Collimonas      | 0 | 0 | 0 | 0 | 0 | 1 | 0 | 3 | 0 | 0 | 0 | 4 |
| Cluster2739; Bacteroid Sphing Sphir Chitinophagaceae        | 0 | 0 | 1 | 1 | 1 | 1 | 0 | 0 | 0 | 0 | 0 | 4 |
| Cluster2954; Actinobac Actinol Actinomycetales              | 0 | 0 | 1 | 0 | 0 | 0 | 0 | 0 | 1 | 2 | 0 | 4 |
| Cluster2967; Proteobac Betaproteobacteria                   | 1 | 0 | 0 | 1 | 1 | 0 | 1 | 0 | 0 | 0 | 0 | 4 |
| Cluster2978; Acidobact Acidobacteria_Gp1                    | 0 | 0 | 0 | 4 | 0 | 0 | 0 | 0 | 0 | 0 | 0 | 4 |
| Cluster3040; Proteobac Alphap Rhod Rhodospirillaceae        | 0 | 1 | 0 | 0 | 0 | 1 | 1 | 0 | 0 | 0 | 1 | 4 |
| Cluster3135; Actinobac Actinol Actin Nocardia Nocardia      | 0 | 1 | 0 | 0 | 0 | 1 | 0 | 1 | 0 | 1 | 0 | 4 |
| Cluster3160; Actinobac Actinol Actin Nocardioideae          | 0 | 0 | 0 | 0 | 0 | 3 | 1 | 0 | 0 | 0 | 0 | 4 |
| Cluster3221; Proteobac Alphap Rhodospirillales              | 0 | 0 | 1 | 0 | 0 | 2 | 0 | 0 | 1 | 0 | 0 | 4 |
| Cluster3272; Actinobac Actinol Acidimicrobiales             | 0 | 1 | 0 | 0 | 2 | 1 | 0 | 0 | 0 | 0 | 0 | 4 |
| Cluster3327;size=34                                         | 0 | 0 | 0 | 0 | 0 | 0 | 0 | 1 | 1 | 0 | 1 | 4 |
| Cluster3492; Proteobac Gamm Xantl Sinobac Steroidobacter    | 0 | 0 | 0 | 2 | 0 | 0 | 1 | 1 | 0 | 0 | 0 | 4 |
| Cluster3593; Chlamydiæ Chlamy Chlar Parachlamydiaceae       | 1 | 0 | 1 | 0 | 2 | 0 | 0 | 0 | 0 | 0 | 0 | 4 |
| Cluster3594; Acidobact Acidobacteria_Gp1                    | 0 | 0 | 1 | 0 | 0 | 0 | 0 | 1 | 0 | 0 | 1 | 4 |
| Cluster3662;size=10                                         | 2 | 0 | 0 | 0 | 2 | 0 | 0 | 0 | 0 | 0 | 0 | 4 |
| Cluster3699; Actinobac Actinol Actinomycetales              | 0 | 1 | 0 | 1 | 2 | 0 | 0 | 0 | 0 | 0 | 0 | 4 |
| Cluster3768; Proteobac Deltap Myxococcales                  | 1 | 0 | 0 | 0 | 0 | 3 | 0 | 0 | 0 | 0 | 0 | 4 |
| Cluster3834; Armatimc Armati Arma Armatin Armatimonas/      | 1 | 0 | 0 | 0 | 0 | 0 | 1 | 0 | 2 | 0 | 0 | 4 |
| Cluster3877;size=40                                         | 0 | 0 | 0 | 0 | 0 | 1 | 0 | 0 | 2 | 0 | 1 | 4 |
| Cluster3957; Bacteroid Sphing Sphir Chitino Ferruginibacte  | 0 | 3 | 0 | 0 | 0 | 0 | 0 | 0 | 0 | 0 | 1 | 4 |
| Cluster4123; Actinobac Actinol Actin Pseudonocardiaceae     | 0 | 0 | 0 | 0 | 1 | 2 | 0 | 0 | 0 | 0 | 1 | 4 |
| Cluster4223; Acidobact Acidobacteria_Gp2 Gp2                | 0 | 0 | 0 | 1 | 1 | 0 | 0 | 0 | 1 | 1 | 0 | 4 |
| Cluster4334; Proteobac Deltap Bdelel Bdelelvi Vampirovibrio | 0 | 2 | 0 | 0 | 0 | 0 | 0 | 0 | 1 | 0 | 1 | 4 |
| Cluster4370; Actinobac Actinol Acidimicrobiales             | 0 | 0 | 1 | 0 | 0 | 1 | 1 | 0 | 0 | 0 | 1 | 4 |
| Cluster4432; Planctom Planct Planc Plancto Singulisphaera   | 0 | 0 | 0 | 1 | 0 | 0 | 1 | 0 | 0 | 0 | 1 | 4 |
| Cluster4673;size=19                                         | 0 | 2 | 0 | 0 | 0 | 0 | 0 | 0 | 0 | 2 | 0 | 4 |
| Cluster4680;size=15                                         | 1 | 0 | 0 | 0 | 0 | 0 | 0 | 3 | 0 | 0 | 0 | 4 |
| Cluster4725; Verrucom Subdivision3 Subdivision3_ξ           | 0 | 0 | 0 | 0 | 3 | 1 | 0 | 0 | 0 | 0 | 0 | 4 |

|                                                               |   |   |   |   |   |   |   |   |   |   |   |   |   |
|---------------------------------------------------------------|---|---|---|---|---|---|---|---|---|---|---|---|---|
| Cluster4803;size=22                                           | 0 | 0 | 0 | 1 | 1 | 0 | 0 | 0 | 1 | 0 | 1 | 0 | 4 |
| Cluster4936;size=35                                           | 0 | 1 | 0 | 0 | 0 | 1 | 1 | 1 | 0 | 0 | 0 | 0 | 4 |
| Cluster4946; Plancton Planct Planct Planctoi Singulisphaera   | 0 | 2 | 0 | 0 | 0 | 1 | 1 | 0 | 0 | 0 | 0 | 0 | 4 |
| Cluster5006; Proteobac Alpha Rhodospirillales                 | 0 | 0 | 1 | 0 | 1 | 1 | 0 | 0 | 0 | 1 | 0 | 0 | 4 |
| Cluster5202; Proteobac Alpha Rhodospirillales                 | 0 | 1 | 0 | 0 | 2 | 0 | 0 | 0 | 0 | 0 | 0 | 1 | 4 |
| Cluster5244; Proteobac Alpha Rhizc Bradyrh Bradyrhizobiur     | 0 | 3 | 0 | 0 | 0 | 0 | 0 | 0 | 0 | 0 | 0 | 1 | 4 |
| Cluster5248; Proteobac Alpha Rhizobiales                      | 0 | 0 | 0 | 1 | 0 | 0 | 1 | 0 | 0 | 2 | 0 | 0 | 4 |
| Cluster5305; Proteobac Alphaproteobacteria                    | 0 | 0 | 0 | 1 | 0 | 0 | 0 | 0 | 0 | 0 | 3 | 0 | 4 |
| Cluster5412; Verrucom Opitut: Opitu Opituta Opitutus          | 0 | 0 | 0 | 0 | 0 | 1 | 0 | 0 | 0 | 2 | 1 | 0 | 4 |
| Cluster5429; Proteobac Alpha Rhod Acetobacteraceae            | 0 | 0 | 1 | 1 | 0 | 0 | 0 | 0 | 0 | 2 | 0 | 0 | 4 |
| Cluster5430; Bacteroid Sphing Sphir Chitinophagaceae          | 2 | 0 | 0 | 0 | 1 | 0 | 0 | 1 | 0 | 0 | 0 | 0 | 4 |
| Cluster5470; Acidobact Acidobacteria_Gp1                      | 1 | 0 | 0 | 0 | 0 | 0 | 1 | 0 | 1 | 0 | 0 | 1 | 4 |
| Cluster5683; Proteobac Deltaproteobacteria                    | 0 | 1 | 1 | 2 | 0 | 0 | 0 | 0 | 0 | 0 | 0 | 0 | 4 |
| Cluster5692; Proteobac Alpha Caulc Cauloba Phenyllobacter     | 0 | 0 | 1 | 0 | 0 | 0 | 0 | 0 | 0 | 0 | 0 | 3 | 4 |
| Cluster5710;size=17                                           | 0 | 1 | 0 | 0 | 0 | 0 | 1 | 0 | 1 | 0 | 0 | 1 | 4 |
| Cluster5808; Elusimicrc Elusim Elusir Elusimic Elusimicrobiun | 0 | 0 | 0 | 0 | 0 | 0 | 1 | 0 | 0 | 1 | 1 | 1 | 4 |
| Cluster5812; Acidobact Acidobacteria_Gp2 Gp2                  | 0 | 0 | 2 | 0 | 0 | 0 | 1 | 0 | 0 | 0 | 1 | 0 | 4 |
| Cluster5898;size=35                                           | 0 | 0 | 1 | 1 | 0 | 0 | 0 | 0 | 0 | 1 | 0 | 1 | 4 |
| Cluster5945; Verrucom Subdivision3 Subdivision3_ξ             | 0 | 0 | 0 | 0 | 0 | 1 | 0 | 0 | 0 | 1 | 2 | 0 | 4 |
| Cluster6009; Acidobact Acidobacteria_Gp2 Gp2                  | 0 | 0 | 0 | 2 | 0 | 0 | 1 | 0 | 0 | 0 | 1 | 0 | 4 |
| Cluster6141;size=18                                           | 0 | 0 | 1 | 0 | 0 | 0 | 0 | 0 | 1 | 0 | 1 | 1 | 4 |
| Cluster6234; Acidobact Acidobacteria_Gp3 Gp3                  | 0 | 2 | 0 | 0 | 0 | 0 | 0 | 0 | 1 | 0 | 1 | 0 | 4 |
| Cluster6260; Acidobact Acidobacteria_Gp3 Gp3                  | 0 | 0 | 0 | 0 | 0 | 1 | 1 | 1 | 0 | 0 | 1 | 0 | 4 |
| Cluster6317;size=14                                           | 1 | 0 | 1 | 0 | 0 | 1 | 0 | 0 | 0 | 0 | 0 | 1 | 4 |
| Cluster6440; Verrucom Subdivision3 Subdivision3_ξ             | 0 | 1 | 1 | 0 | 0 | 0 | 0 | 0 | 0 | 0 | 2 | 0 | 4 |
| Cluster6476; Proteobac Gamm Xantl Sinobac Steroidobacter      | 1 | 1 | 0 | 0 | 0 | 0 | 0 | 0 | 0 | 0 | 0 | 2 | 4 |
| Cluster6480; Proteobac Deltap Myxococcales                    | 0 | 0 | 0 | 0 | 0 | 1 | 0 | 3 | 0 | 0 | 0 | 0 | 4 |
| Cluster6509; Verrucom Subdivision3 Subdivision3_ξ             | 0 | 0 | 0 | 0 | 0 | 1 | 1 | 1 | 0 | 0 | 0 | 1 | 4 |
| Cluster6591; Firmicute: Bacilli Bacill Bacillac Bacillus      | 0 | 0 | 0 | 0 | 0 | 0 | 1 | 1 | 2 | 0 | 0 | 0 | 4 |

|                                                          |   |   |   |   |   |   |   |   |   |   |   |   |   |
|----------------------------------------------------------|---|---|---|---|---|---|---|---|---|---|---|---|---|
| Cluster6710; Proteobac Alphap Rhizobiales                | 1 | 0 | 0 | 0 | 1 | 1 | 0 | 0 | 0 | 1 | 0 | 0 | 4 |
| Cluster7030; Acidobact Acidobacteria_Gp3 Gp3             | 0 | 1 | 1 | 2 | 0 | 0 | 0 | 0 | 0 | 0 | 0 | 0 | 4 |
| Cluster7076; Acidobact Acidobacteria_Gp3 Gp3             | 0 | 2 | 0 | 0 | 0 | 1 | 0 | 0 | 0 | 1 | 0 | 0 | 4 |
| Cluster7116; Bacteroid Sphing Sphingobacteriales         | 1 | 1 | 0 | 0 | 0 | 0 | 0 | 2 | 0 | 0 | 0 | 0 | 4 |
| Cluster7129; Acidobact Acidobacteria_Gp1 Gp1             | 0 | 0 | 0 | 1 | 3 | 0 | 0 | 0 | 0 | 0 | 0 | 0 | 4 |
| Cluster7432;size=12                                      | 0 | 1 | 0 | 0 | 0 | 1 | 0 | 0 | 0 | 2 | 0 | 0 | 4 |
| Cluster7434; Proteobac Alphap Rhod Acetobac Acidisphaera | 2 | 0 | 1 | 1 | 0 | 0 | 0 | 0 | 0 | 0 | 0 | 0 | 4 |
| Cluster7633; Acidobact Acidobacteria_Gp3 Gp3             | 1 | 0 | 0 | 1 | 0 | 0 | 1 | 0 | 1 | 0 | 0 | 0 | 4 |
| Cluster7854; Proteobac Betapr Burkholderiales            | 1 | 0 | 1 | 0 | 0 | 0 | 0 | 1 | 0 | 0 | 1 | 0 | 4 |
| Cluster7860; Verrucomicrobia                             | 1 | 0 | 2 | 0 | 0 | 0 | 0 | 0 | 0 | 0 | 0 | 1 | 4 |
| Cluster7937; Proteobac Alphap Rhodospirillales           | 0 | 0 | 0 | 0 | 2 | 0 | 0 | 0 | 0 | 0 | 0 | 2 | 4 |
| Cluster7970;size=7                                       | 1 | 0 | 0 | 0 | 0 | 1 | 0 | 0 | 1 | 0 | 1 | 0 | 4 |
| Cluster8215;size=23                                      | 0 | 0 | 1 | 0 | 0 | 0 | 1 | 0 | 0 | 0 | 1 | 1 | 4 |
| Cluster8233; Proteobac Betapr Burkl Burkhol Burkholderia | 4 | 0 | 0 | 0 | 0 | 0 | 0 | 0 | 0 | 0 | 0 | 0 | 4 |
| Cluster8237; Acidobact Acidobacteria_Gp1 Gp1             | 0 | 0 | 0 | 0 | 1 | 0 | 2 | 1 | 0 | 0 | 0 | 0 | 4 |
| Cluster8334; Proteobac Gamm Xantf Sinobac Steroidobacter | 0 | 0 | 1 | 3 | 0 | 0 | 0 | 0 | 0 | 0 | 0 | 0 | 4 |
| Cluster8394; Proteobac Alphap Rhodospirillales           | 1 | 0 | 0 | 0 | 0 | 0 | 0 | 0 | 0 | 0 | 2 | 1 | 4 |
| Cluster8562; Proteobac Alphap Rhodospirillales           | 0 | 2 | 0 | 0 | 0 | 0 | 0 | 0 | 0 | 1 | 0 | 1 | 4 |
| Cluster8812;size=44                                      | 1 | 0 | 1 | 0 | 0 | 0 | 0 | 1 | 0 | 0 | 1 | 0 | 4 |
| Cluster9100; Verrucom Spartobacteria Spartobacteria      | 0 | 1 | 0 | 0 | 0 | 0 | 1 | 2 | 0 | 0 | 0 | 0 | 4 |
| Cluster9405; Gemmatir Gemm Geml Gemma Gemmatimonac       | 0 | 2 | 0 | 0 | 0 | 0 | 0 | 0 | 0 | 0 | 0 | 2 | 4 |
| Cluster9418; Acidobact Acidobacteria_Gp1                 | 0 | 0 | 0 | 1 | 0 | 0 | 1 | 1 | 0 | 0 | 1 | 0 | 4 |
| Cluster9529; Proteobac Betapr Burkl Burkhol Burkholderia | 0 | 1 | 0 | 1 | 0 | 1 | 0 | 0 | 0 | 0 | 0 | 1 | 4 |
| Cluster9566; Acidobact Acidobacteria_Gp2 Gp2             | 0 | 1 | 1 | 1 | 0 | 0 | 0 | 1 | 0 | 0 | 0 | 0 | 4 |
| Cluster9614; Proteobac Alphap Rhod Acetobac Acidisphaera | 2 | 0 | 0 | 0 | 1 | 1 | 0 | 0 | 0 | 0 | 0 | 0 | 4 |
| Cluster9660; Proteobac Alphap Rhod Acetobacteraceae      | 0 | 0 | 1 | 0 | 0 | 1 | 0 | 1 | 0 | 1 | 0 | 0 | 4 |
| Cluster9729; Actinobac Actinobacteria                    | 1 | 0 | 0 | 0 | 2 | 0 | 0 | 0 | 1 | 0 | 0 | 0 | 4 |
| Cluster10012 Proteobac Alphap Rhodospirillales           | 0 | 0 | 0 | 0 | 0 | 0 | 0 | 2 | 1 | 0 | 0 | 1 | 4 |
| Cluster10075 TM7 TM7_genera_i                            | 0 | 0 | 1 | 0 | 0 | 0 | 0 | 0 | 1 | 1 | 1 | 0 | 4 |



|                                                            |   |   |   |   |   |   |   |   |   |   |   |   |   |
|------------------------------------------------------------|---|---|---|---|---|---|---|---|---|---|---|---|---|
| Cluster16093 Firmicutes                                    | 0 | 0 | 2 | 0 | 0 | 0 | 0 | 0 | 0 | 1 | 1 | 0 | 4 |
| Cluster16284 Acidobact Acidobacteria_Gp3 Gp3               | 0 | 0 | 0 | 2 | 0 | 0 | 0 | 1 | 0 | 0 | 1 | 0 | 4 |
| Cluster16381 Acidobact Acidobacteria_Gp2 Gp2               | 0 | 0 | 0 | 0 | 1 | 0 | 0 | 1 | 2 | 0 | 0 | 0 | 4 |
| Cluster16407 Acidobact Acidobacteria_Gp1 Gp1               | 0 | 0 | 0 | 0 | 0 | 1 | 0 | 0 | 2 | 1 | 0 | 0 | 4 |
| Cluster16534 Acidobact Acidobacteria_Gp1                   | 0 | 0 | 0 | 0 | 0 | 1 | 0 | 0 | 0 | 2 | 1 | 0 | 4 |
| Cluster16591 Gemmatir Gemm Gemm Gemma Gemmatimonas         | 0 | 0 | 0 | 0 | 0 | 0 | 0 | 1 | 1 | 1 | 1 | 0 | 4 |
| Cluster16805 Proteobac Deltaproteobacteria                 | 0 | 0 | 1 | 2 | 0 | 0 | 0 | 0 | 0 | 0 | 0 | 1 | 4 |
| Cluster16846 Acidobact Acidobacteria_Gp1                   | 0 | 0 | 2 | 1 | 0 | 1 | 0 | 0 | 0 | 0 | 0 | 0 | 4 |
| Cluster16860 Acidobact Acidobacteria_Gp1                   | 0 | 0 | 0 | 1 | 0 | 0 | 0 | 0 | 0 | 2 | 1 | 0 | 4 |
| Cluster17047 Chloroflex Ktedon Ktedon Ktedonobacter        | 0 | 0 | 0 | 0 | 1 | 0 | 0 | 2 | 0 | 0 | 1 | 0 | 4 |
| Cluster17154 Actinobac Actinol Actin Strepto Kitasatospora | 0 | 0 | 1 | 0 | 0 | 0 | 0 | 0 | 1 | 0 | 1 | 1 | 4 |
| Cluster17165 Acidobact Acidobacteria_Gp2 Gp2               | 0 | 0 | 2 | 0 | 0 | 0 | 1 | 0 | 0 | 0 | 1 | 0 | 4 |
| Cluster17186 Acidobact Acidobacteria_Gp1 Gp1               | 0 | 0 | 2 | 1 | 0 | 0 | 0 | 0 | 0 | 0 | 1 | 0 | 4 |
| Cluster17188 Verrucom Opirit Opirit Opirit Opirit          | 0 | 0 | 0 | 0 | 0 | 1 | 0 | 0 | 0 | 3 | 0 | 0 | 4 |
| Cluster17384 Acidobact Acidobacteria_Gp1                   | 1 | 1 | 0 | 1 | 0 | 0 | 0 | 0 | 0 | 1 | 0 | 0 | 4 |
| Cluster17936 Acidobact Acidobacteria_Gp3                   | 0 | 1 | 0 | 0 | 0 | 0 | 0 | 1 | 0 | 0 | 1 | 1 | 4 |
| Cluster18083 Proteobac Alphap Rhodospirillales             | 1 | 0 | 0 | 0 | 0 | 0 | 0 | 0 | 0 | 0 | 3 | 0 | 4 |
| Cluster18181 Proteobac Betapr Rhod Rhodocyclaceae          | 3 | 0 | 0 | 0 | 1 | 0 | 0 | 0 | 0 | 0 | 0 | 0 | 4 |
| Cluster18344 Acidobact Acidobacteria_Gp2 Gp2               | 0 | 0 | 1 | 2 | 0 | 0 | 0 | 0 | 0 | 0 | 1 | 0 | 4 |
| Cluster18486 Acidobact Acidobacteria_Gp2 Gp2               | 1 | 2 | 0 | 0 | 0 | 0 | 0 | 0 | 1 | 0 | 0 | 0 | 4 |
| Cluster18510 Bacteroid Sphing Sphir Chitinophagaceae       | 1 | 0 | 0 | 0 | 0 | 2 | 0 | 0 | 0 | 1 | 0 | 0 | 4 |
| Cluster18516 Acidobact Acidobacteria_Gp2 Gp2               | 0 | 0 | 0 | 0 | 1 | 0 | 0 | 1 | 0 | 0 | 2 | 0 | 4 |
| Cluster18520 Proteobac Alphap Rhod Acetobacteraceae        | 0 | 0 | 0 | 0 | 0 | 0 | 0 | 0 | 1 | 2 | 1 | 0 | 4 |
| Cluster18713 Acidobact Acidobacteria_Gp2 Gp2               | 0 | 0 | 1 | 3 | 0 | 0 | 0 | 0 | 0 | 0 | 0 | 0 | 4 |
| Cluster18773 Acidobact Acidobacteria_Gp2 Gp2               | 2 | 1 | 0 | 0 | 1 | 0 | 0 | 0 | 0 | 0 | 0 | 0 | 4 |
| Cluster18814 Acidobact Acidobacteria_Gp2 Gp2               | 0 | 0 | 2 | 0 | 0 | 0 | 1 | 0 | 1 | 0 | 0 | 0 | 4 |
| Cluster19021 Acidobact Acidobacteria_Gp2 Gp2               | 1 | 0 | 0 | 0 | 0 | 0 | 1 | 0 | 1 | 0 | 0 | 1 | 4 |
| Cluster19172 Proteobac Alphap Alphaproteob Rhizomicrobiu   | 1 | 0 | 0 | 0 | 0 | 0 | 0 | 1 | 0 | 0 | 1 | 1 | 4 |
| Cluster19233 Acidobact Acidobacteria_Gp3 Gp3               | 0 | 1 | 0 | 1 | 0 | 0 | 0 | 1 | 1 | 0 | 0 | 0 | 4 |

|                                                             |   |   |   |   |   |   |   |   |   |   |   |   |   |
|-------------------------------------------------------------|---|---|---|---|---|---|---|---|---|---|---|---|---|
| Cluster19706 Acidobact Acidobacteria_Gp3 Gp3                | 0 | 0 | 0 | 0 | 0 | 1 | 2 | 0 | 0 | 0 | 0 | 1 | 4 |
| Cluster19786 Proteobac Betapr Burkli Burkhol Pandoraea      | 0 | 0 | 0 | 0 | 0 | 0 | 2 | 0 | 0 | 1 | 1 | 0 | 4 |
| Cluster20172 Acidobact Acidobacteria_Gp1                    | 0 | 0 | 0 | 2 | 1 | 1 | 0 | 0 | 0 | 0 | 0 | 0 | 4 |
| Cluster20395 Proteobac Betapr Burkli Burkhol Burkholderia   | 0 | 0 | 2 | 2 | 0 | 0 | 0 | 0 | 0 | 0 | 0 | 0 | 4 |
| Cluster20425 Acidobact Acidobacteria_Gp3 Gp3                | 0 | 0 | 1 | 1 | 1 | 0 | 0 | 0 | 0 | 1 | 0 | 0 | 4 |
| Cluster20634 Proteobac Gammaproteobacteria                  | 0 | 0 | 1 | 1 | 1 | 0 | 0 | 0 | 0 | 0 | 0 | 1 | 4 |
| Cluster21344;size=15                                        | 0 | 0 | 1 | 1 | 0 | 0 | 0 | 1 | 0 | 0 | 1 | 0 | 4 |
| Cluster21466 Proteobac Alphap Rhodospirillales              | 0 | 0 | 1 | 3 | 0 | 0 | 0 | 0 | 0 | 0 | 0 | 0 | 4 |
| Cluster21725 Acidobact Acidobacteria_Gp1                    | 0 | 0 | 1 | 0 | 2 | 0 | 1 | 0 | 0 | 0 | 0 | 0 | 4 |
| Cluster21783 Proteobac Alphap Rhod Acetobacteraceae         | 0 | 0 | 0 | 0 | 0 | 0 | 0 | 0 | 0 | 2 | 2 | 0 | 4 |
| Cluster21853 Acidobact Acidobacteria_Gp2 Gp2                | 0 | 1 | 0 | 0 | 0 | 0 | 0 | 1 | 1 | 0 | 1 | 0 | 4 |
| Cluster21983 Proteobac Alphap Rhodospirillales              | 0 | 0 | 0 | 1 | 0 | 0 | 3 | 0 | 0 | 0 | 0 | 0 | 4 |
| Cluster22104 Acidobact Acidobacteria_Gp2 Gp2                | 1 | 0 | 0 | 0 | 0 | 0 | 0 | 2 | 0 | 1 | 0 | 0 | 4 |
| Cluster22180 Bacteroid Sphing Sphir Chitinophagaceae        | 1 | 0 | 0 | 2 | 0 | 0 | 0 | 0 | 0 | 0 | 1 | 0 | 4 |
| Cluster22271 Actinobac Actinol Actinomycetales              | 0 | 0 | 0 | 0 | 0 | 0 | 1 | 0 | 0 | 1 | 1 | 1 | 4 |
| Cluster22321 Chlamydia Chlamy Chlar Parachlamydiaceae       | 0 | 2 | 0 | 0 | 1 | 0 | 0 | 1 | 0 | 0 | 0 | 0 | 4 |
| Cluster23857 Proteobac Alphap Caulc Caulobac Phenyllobacter | 0 | 0 | 1 | 0 | 1 | 1 | 0 | 0 | 0 | 1 | 0 | 0 | 4 |
| Cluster23878 Proteobac Gammaproteobacteria                  | 0 | 0 | 0 | 0 | 3 | 1 | 0 | 0 | 0 | 0 | 0 | 0 | 4 |
| Cluster24368 Bacteroid Sphing Sphir Chitinophagaceae        | 0 | 0 | 1 | 0 | 1 | 0 | 0 | 1 | 0 | 0 | 1 | 0 | 4 |
| Cluster24594 Actinobac Actinol Actinomycetales              | 0 | 0 | 0 | 2 | 1 | 0 | 0 | 0 | 0 | 1 | 0 | 0 | 4 |
| Cluster24675 Actinobac Actinol Actin Thermo Actinomadura    | 0 | 1 | 0 | 0 | 0 | 0 | 0 | 0 | 0 | 1 | 0 | 2 | 4 |
| Cluster24778 Actinobac Actinol Actinomycetales              | 0 | 0 | 1 | 0 | 0 | 0 | 2 | 1 | 0 | 0 | 0 | 0 | 4 |
| Cluster24807 Actinobac Actinol Actinomycetales              | 0 | 0 | 0 | 1 | 0 | 0 | 2 | 0 | 0 | 0 | 1 | 0 | 4 |
| Cluster24870;size=10                                        | 0 | 0 | 0 | 1 | 0 | 0 | 0 | 2 | 0 | 0 | 1 | 0 | 4 |
| Cluster25182 Proteobac Alphap Alphaproteobact Rhizomicrobiu | 0 | 0 | 1 | 0 | 0 | 0 | 2 | 0 | 1 | 0 | 0 | 0 | 4 |
| Cluster25742 Acidobact Acidobacteria_Gp2 Gp2                | 0 | 1 | 0 | 0 | 0 | 1 | 1 | 1 | 0 | 0 | 0 | 0 | 4 |
| Cluster25757 Proteobac Gammaproteobacteria                  | 0 | 0 | 0 | 0 | 1 | 1 | 0 | 1 | 0 | 1 | 0 | 0 | 4 |
| Cluster26809 Acidobact Acidobacteria_Gp3 Gp3                | 0 | 0 | 0 | 1 | 0 | 0 | 0 | 0 | 0 | 0 | 0 | 3 | 4 |
| Cluster27201 Bacteroid Sphing Sphir Chitino Sediminibacteri | 0 | 0 | 0 | 1 | 0 | 1 | 0 | 0 | 0 | 1 | 0 | 1 | 4 |





|                                                             |   |   |   |   |   |   |   |   |   |   |   |   |   |
|-------------------------------------------------------------|---|---|---|---|---|---|---|---|---|---|---|---|---|
| Cluster550;si Acidobact Acidobacteria_Gp1 Gp1               | 0 | 0 | 0 | 0 | 1 | 1 | 0 | 0 | 1 | 0 | 0 | 0 | 3 |
| Cluster582;si Proteobac Betaproteobacteria                  | 0 | 0 | 0 | 0 | 0 | 0 | 0 | 1 | 1 | 1 | 0 | 0 | 3 |
| Cluster591;si Proteobac Alphap Rhodospirillales             | 2 | 0 | 0 | 0 | 0 | 0 | 0 | 0 | 0 | 0 | 1 | 0 | 3 |
| Cluster598;si Acidobact Acidobacteria_Gp1 Gp1               | 0 | 0 | 0 | 1 | 0 | 0 | 1 | 0 | 1 | 0 | 0 | 0 | 3 |
| Cluster650;si Acidobact Acidobacteria_Gp1 Gp1               | 0 | 0 | 1 | 0 | 0 | 0 | 0 | 0 | 0 | 1 | 1 | 0 | 3 |
| Cluster661;si Proteobac Alphap Rhod Acetobacteraceae        | 0 | 0 | 1 | 1 | 0 | 0 | 0 | 0 | 0 | 0 | 1 | 0 | 3 |
| Cluster664;size=28                                          | 1 | 1 | 0 | 0 | 0 | 0 | 0 | 0 | 0 | 1 | 0 | 0 | 3 |
| Cluster766;size=12                                          | 0 | 0 | 1 | 1 | 0 | 0 | 1 | 0 | 0 | 0 | 0 | 0 | 3 |
| Cluster769;si Actinobac Actinol Solirubrobacterales         | 0 | 0 | 0 | 0 | 0 | 0 | 0 | 0 | 0 | 1 | 2 | 0 | 3 |
| Cluster792;si Chloroflex Ktedor Ktedonobacterales           | 1 | 0 | 0 | 0 | 0 | 0 | 0 | 2 | 0 | 0 | 0 | 0 | 3 |
| Cluster799;si Acidobact Acidobacteria_Gp1 Gp1               | 0 | 1 | 0 | 0 | 0 | 1 | 0 | 0 | 1 | 0 | 0 | 0 | 3 |
| Cluster804;si Nitrospira Nitrosq Nitro Nitrospi Nitrospira  | 0 | 1 | 0 | 0 | 0 | 0 | 0 | 0 | 0 | 0 | 0 | 2 | 3 |
| Cluster852;si Proteobacteria                                | 0 | 1 | 0 | 0 | 0 | 2 | 0 | 0 | 0 | 0 | 0 | 0 | 3 |
| Cluster860;si Actinobac Actinol Actin Actinosj Actinospica  | 1 | 1 | 0 | 0 | 0 | 1 | 0 | 0 | 0 | 0 | 0 | 0 | 3 |
| Cluster864;si Verrucom Spartobacteria Spartobacteria        | 0 | 0 | 0 | 0 | 0 | 0 | 0 | 1 | 0 | 0 | 1 | 1 | 3 |
| Cluster887;si Acidobact Acidobacteria_Gp1 Gp1               | 0 | 0 | 0 | 0 | 0 | 0 | 0 | 0 | 0 | 3 | 0 | 0 | 3 |
| Cluster907;si Gemmatir Gemm Gemj Gemma Gemmatimonas         | 0 | 0 | 0 | 0 | 0 | 0 | 0 | 2 | 0 | 1 | 0 | 0 | 3 |
| Cluster912;si Proteobac Alphap Rhizc Bradyrhizobiaceae      | 0 | 0 | 1 | 0 | 1 | 1 | 0 | 0 | 0 | 0 | 0 | 0 | 3 |
| Cluster924;si Acidobact Acidobacteria_Gp1 Gp1               | 0 | 0 | 0 | 0 | 0 | 0 | 0 | 0 | 0 | 3 | 0 | 0 | 3 |
| Cluster943;si Actinobac Actinol Solirl Conexib Conexibacter | 0 | 0 | 0 | 0 | 0 | 0 | 2 | 1 | 0 | 0 | 0 | 0 | 3 |
| Cluster954;si Acidobact Acidobacteria_Gp3 Gp3               | 0 | 2 | 0 | 0 | 0 | 0 | 0 | 0 | 1 | 0 | 0 | 0 | 3 |
| Cluster958;si Acidobact Acidobacteria_Gp1                   | 0 | 0 | 1 | 1 | 1 | 0 | 0 | 0 | 0 | 0 | 0 | 0 | 3 |
| Cluster995;si Proteobac Gammaproteobacteria                 | 1 | 0 | 0 | 0 | 0 | 0 | 0 | 1 | 0 | 1 | 0 | 0 | 3 |
| Cluster1002;size=15                                         | 0 | 0 | 1 | 2 | 0 | 0 | 0 | 0 | 0 | 0 | 0 | 0 | 3 |
| Cluster1030; Proteobac Alphaproteobacteria                  | 1 | 0 | 0 | 1 | 0 | 0 | 0 | 0 | 0 | 0 | 1 | 0 | 3 |
| Cluster1071; Proteobac Deltap Myxc Cystobacteraceae         | 0 | 0 | 1 | 1 | 0 | 1 | 0 | 0 | 0 | 0 | 0 | 0 | 3 |
| Cluster1074; Verrucom Opitutae                              | 2 | 0 | 0 | 0 | 0 | 1 | 0 | 0 | 0 | 0 | 0 | 0 | 3 |
| Cluster1081; Proteobac Betapr Rhod Rhodocyclaceae           | 0 | 1 | 0 | 0 | 0 | 0 | 2 | 0 | 0 | 0 | 0 | 0 | 3 |
| Cluster1090; Acidobact Acidobacteria_Gp1 Gp1                | 0 | 0 | 0 | 0 | 1 | 1 | 0 | 0 | 1 | 0 | 0 | 0 | 3 |

|                                                         |   |   |   |   |   |   |   |   |   |   |   |   |   |
|---------------------------------------------------------|---|---|---|---|---|---|---|---|---|---|---|---|---|
| Cluster1092; Proteobac Gammaproteobacteria              | 1 | 0 | 0 | 0 | 0 | 0 | 0 | 0 | 0 | 2 | 0 | 0 | 3 |
| Cluster1120; Acidobact Acidobacteria_Gp6 Gp6            | 1 | 0 | 0 | 0 | 1 | 0 | 1 | 0 | 0 | 0 | 0 | 0 | 3 |
| Cluster1144; Acidobact Acidobacteria_Gp2 Gp2            | 0 | 1 | 1 | 0 | 0 | 0 | 0 | 0 | 0 | 0 | 0 | 1 | 3 |
| Cluster1165; Acidobact Acidobacteria_Gp2 Gp2            | 0 | 2 | 0 | 0 | 0 | 0 | 0 | 0 | 0 | 0 | 0 | 1 | 3 |
| Cluster1182; Acidobact Acidobacteria_Gp2 Gp2            | 0 | 0 | 0 | 0 | 0 | 0 | 1 | 0 | 0 | 2 | 0 | 0 | 3 |
| Cluster1198; Armatimc Armati Arma Armatin Armatimonas/  | 0 | 0 | 0 | 0 | 0 | 0 | 1 | 0 | 0 | 0 | 1 | 1 | 3 |
| Cluster1207; Verrucom Opitut; Opitu Opituta Opitutus    | 0 | 1 | 0 | 0 | 0 | 1 | 0 | 0 | 0 | 1 | 0 | 0 | 3 |
| Cluster1216; Acidobact Acidobacteria_Gp1 Acidobacteriur | 0 | 0 | 0 | 1 | 0 | 0 | 0 | 0 | 0 | 2 | 0 | 0 | 3 |
| Cluster1252; Acidobact Acidobacteria_Gp2 Gp2            | 0 | 0 | 0 | 1 | 0 | 0 | 0 | 1 | 0 | 0 | 0 | 1 | 3 |
| Cluster1275; Acidobact Acidobacteria_Gp1 Gp1            | 0 | 0 | 0 | 0 | 1 | 1 | 1 | 0 | 0 | 0 | 0 | 0 | 3 |
| Cluster1279; Actinobac Actinol Actinomycetales          | 1 | 0 | 0 | 0 | 0 | 0 | 0 | 0 | 0 | 1 | 0 | 1 | 3 |
| Cluster1310; Gemmatir Gemm Gemı Gemma Gemmatimonad      | 0 | 0 | 0 | 0 | 0 | 0 | 2 | 1 | 0 | 0 | 0 | 0 | 3 |
| Cluster1331; TM7 TM7_genera_i                           | 0 | 0 | 0 | 0 | 2 | 0 | 0 | 1 | 0 | 0 | 0 | 0 | 3 |
| Cluster1333; Actinobac Actinol Acidimicrobiales         | 0 | 1 | 0 | 0 | 0 | 0 | 0 | 0 | 1 | 0 | 0 | 1 | 3 |
| Cluster1344; Acidobact Acidobacteria_Gp1 Gp1            | 1 | 0 | 0 | 0 | 0 | 1 | 0 | 1 | 0 | 0 | 0 | 0 | 3 |
| Cluster1379;size=21                                     | 0 | 0 | 0 | 1 | 0 | 0 | 1 | 0 | 0 | 0 | 0 | 1 | 3 |
| Cluster1388; Acidobact Acidobacteria_Gp1                | 0 | 1 | 1 | 0 | 0 | 0 | 0 | 1 | 0 | 0 | 0 | 0 | 3 |
| Cluster1404; Proteobac Alphap Rhodospirillales          | 0 | 0 | 0 | 1 | 1 | 0 | 0 | 0 | 0 | 0 | 0 | 1 | 3 |
| Cluster1449; Armatimonadetes Armatimonade               | 1 | 0 | 0 | 0 | 0 | 1 | 0 | 0 | 0 | 0 | 0 | 1 | 3 |
| Cluster1452; Acidobact Acidobacteria_Gp2 Gp2            | 1 | 0 | 0 | 1 | 0 | 0 | 0 | 0 | 0 | 0 | 0 | 1 | 3 |
| Cluster1454; Proteobac Deltap Myxococcales              | 0 | 0 | 0 | 0 | 0 | 1 | 0 | 1 | 1 | 0 | 0 | 0 | 3 |
| Cluster1491; Acidobact Acidobacteria_Gp1 Gp1            | 0 | 0 | 0 | 0 | 0 | 0 | 0 | 0 | 0 | 1 | 0 | 2 | 3 |
| Cluster1516; Proteobac Deltap Myxc Cystobacteraceae     | 0 | 0 | 0 | 0 | 0 | 0 | 1 | 1 | 0 | 0 | 0 | 1 | 3 |
| Cluster1528; Chlamydi; Chlamy Chlamydiales              | 0 | 0 | 0 | 0 | 1 | 1 | 1 | 0 | 0 | 0 | 0 | 0 | 3 |
| Cluster1555; Acidobact Acidobacteria_Gp1                | 0 | 0 | 1 | 0 | 1 | 0 | 0 | 0 | 0 | 0 | 0 | 1 | 3 |
| Cluster1559;size=22                                     | 1 | 0 | 0 | 0 | 0 | 0 | 1 | 0 | 0 | 0 | 1 | 0 | 3 |
| Cluster1601; Proteobac Alphaproteobacteria              | 0 | 0 | 0 | 0 | 0 | 0 | 1 | 1 | 0 | 0 | 0 | 1 | 3 |
| Cluster1609; Acidobact Acidobacteria_Gp1 Gp1            | 0 | 2 | 0 | 0 | 0 | 0 | 0 | 0 | 0 | 0 | 0 | 1 | 3 |
| Cluster1626; Bacteroid Sphing Sphir Chitinophagaceae    | 0 | 0 | 0 | 0 | 0 | 1 | 2 | 0 | 0 | 0 | 0 | 0 | 3 |

|                                                           |   |   |   |   |   |   |   |   |   |   |   |   |   |
|-----------------------------------------------------------|---|---|---|---|---|---|---|---|---|---|---|---|---|
| Cluster1647; Acidobact Acidobacteria_Gp1 Gp1              | 0 | 0 | 0 | 2 | 0 | 0 | 0 | 1 | 0 | 0 | 0 | 0 | 3 |
| Cluster1695; Proteobac Betapr Burkli Burkhol Burkholderia | 0 | 0 | 0 | 1 | 0 | 0 | 1 | 1 | 0 | 0 | 0 | 0 | 3 |
| Cluster1717; Proteobac Alpha; Alphaproteok Rhizomicrobiu  | 0 | 1 | 0 | 0 | 0 | 0 | 1 | 0 | 0 | 0 | 0 | 1 | 3 |
| Cluster1739; Acidobact Acidobacteria_Gp1 Edaphobacter     | 0 | 0 | 1 | 0 | 0 | 0 | 1 | 0 | 0 | 1 | 0 | 0 | 3 |
| Cluster1743; Proteobac Alpha; Rhodospirillales            | 0 | 0 | 0 | 0 | 0 | 0 | 0 | 0 | 1 | 1 | 1 | 0 | 3 |
| Cluster1757;size=10                                       | 2 | 0 | 0 | 1 | 0 | 0 | 0 | 0 | 0 | 0 | 0 | 0 | 3 |
| Cluster1768; Proteobacteria                               | 0 | 0 | 0 | 0 | 0 | 1 | 1 | 0 | 1 | 0 | 0 | 0 | 3 |
| Cluster1801;size=15                                       | 0 | 0 | 0 | 0 | 1 | 0 | 0 | 0 | 1 | 1 | 0 | 0 | 3 |
| Cluster1820; Acidobact Acidobacteria_Gp3 Gp3              | 0 | 1 | 0 | 0 | 0 | 0 | 0 | 0 | 0 | 0 | 0 | 2 | 3 |
| Cluster1860; Acidobact Acidobacteria_Gp2 Gp2              | 0 | 1 | 1 | 0 | 0 | 0 | 1 | 0 | 0 | 0 | 0 | 0 | 3 |
| Cluster1912; Proteobac Gammaproteobacteria                | 0 | 0 | 0 | 0 | 1 | 0 | 0 | 0 | 0 | 0 | 1 | 1 | 3 |
| Cluster1921; Acidobact Acidobacteria_Gp6 Gp6              | 0 | 2 | 0 | 0 | 0 | 0 | 0 | 1 | 0 | 0 | 0 | 0 | 3 |
| Cluster1926;size=12                                       | 0 | 1 | 0 | 0 | 0 | 0 | 0 | 1 | 1 | 0 | 0 | 0 | 3 |
| Cluster1956; Acidobact Acidobacteria_Gp2 Gp2              | 1 | 0 | 0 | 0 | 0 | 0 | 0 | 0 | 0 | 1 | 0 | 1 | 3 |
| Cluster1967; Bacteroid Sphing Sphir Chitinophagaceae      | 2 | 0 | 1 | 0 | 0 | 0 | 0 | 0 | 0 | 0 | 0 | 0 | 3 |
| Cluster2013; Proteobac Gammaproteobacteria                | 0 | 0 | 0 | 0 | 0 | 2 | 0 | 0 | 0 | 1 | 0 | 0 | 3 |
| Cluster2039; Proteobac Gamm Xantl Sinobac Steroidobacter  | 1 | 0 | 0 | 1 | 0 | 0 | 0 | 0 | 0 | 0 | 1 | 0 | 3 |
| Cluster2043; Acidobact Acidobacteria_Gp2 Gp2              | 0 | 0 | 0 | 1 | 0 | 0 | 1 | 0 | 0 | 0 | 0 | 1 | 3 |
| Cluster2044; Acidobact Acidobacteria_Gp1                  | 1 | 0 | 0 | 0 | 0 | 0 | 0 | 0 | 0 | 1 | 1 | 0 | 3 |
| Cluster2063; Proteobac Deltaproteobacteria                | 1 | 0 | 0 | 1 | 0 | 0 | 0 | 0 | 0 | 1 | 0 | 0 | 3 |
| Cluster2073; Proteobac Alpha; Alphaproteok Rhizomicrobiu  | 0 | 0 | 0 | 1 | 0 | 0 | 1 | 0 | 0 | 0 | 1 | 0 | 3 |
| Cluster2085; Proteobac Alpha; Rhodospirillales            | 0 | 0 | 0 | 1 | 0 | 0 | 0 | 0 | 0 | 2 | 0 | 0 | 3 |
| Cluster2086; Verrucom Opitut; Opitu; Opituta Opitutus     | 0 | 2 | 0 | 0 | 0 | 0 | 0 | 0 | 1 | 0 | 0 | 0 | 3 |
| Cluster2098; Acidobact Acidobacteria_Gp2 Gp2              | 1 | 1 | 1 | 0 | 0 | 0 | 0 | 0 | 0 | 0 | 0 | 0 | 3 |
| Cluster2117; Proteobac Deltap Myxococcales                | 1 | 0 | 0 | 0 | 1 | 0 | 0 | 0 | 0 | 0 | 1 | 0 | 3 |
| Cluster2135; Planctomycetes                               | 0 | 0 | 0 | 0 | 0 | 1 | 0 | 1 | 0 | 0 | 1 | 0 | 3 |
| Cluster2143; Proteobac Gamm Enter Enterobacteriaceae      | 0 | 0 | 0 | 0 | 0 | 2 | 1 | 0 | 0 | 0 | 0 | 0 | 3 |
| Cluster2189; Proteobac Betapr Burkli Burkhol Burkholderia | 2 | 0 | 0 | 0 | 0 | 0 | 1 | 0 | 0 | 0 | 0 | 0 | 3 |
| Cluster2244;size=21                                       | 0 | 0 | 0 | 0 | 0 | 0 | 0 | 0 | 1 | 0 | 0 | 2 | 3 |

|                                                               |   |   |   |   |   |   |   |   |   |   |   |   |   |
|---------------------------------------------------------------|---|---|---|---|---|---|---|---|---|---|---|---|---|
| Cluster2291; Proteobac Alphap Caulc Caulobacteraceae          | 0 | 1 | 0 | 2 | 0 | 0 | 0 | 0 | 0 | 0 | 0 | 0 | 3 |
| Cluster2324; Actinobac Actinol Acidi Acidimii Aciditerrimona  | 0 | 0 | 0 | 0 | 1 | 0 | 1 | 0 | 1 | 0 | 0 | 0 | 3 |
| Cluster2329;size=14                                           | 2 | 0 | 0 | 0 | 0 | 0 | 0 | 0 | 0 | 0 | 0 | 1 | 3 |
| Cluster2364; Acidobact Acidobacteria_Gp1                      | 0 | 0 | 2 | 1 | 0 | 0 | 0 | 0 | 0 | 0 | 0 | 0 | 3 |
| Cluster2420; Proteobac Deltap Myxococcales                    | 0 | 1 | 0 | 0 | 2 | 0 | 0 | 0 | 0 | 0 | 0 | 0 | 3 |
| Cluster2430; Actinobac Actinol Actinomycetales                | 0 | 0 | 0 | 0 | 0 | 1 | 0 | 0 | 1 | 0 | 1 | 0 | 3 |
| Cluster2451; Elusimicrc Elusim Elusir Elusimic Elusimicrobiun | 2 | 1 | 0 | 0 | 0 | 0 | 0 | 0 | 0 | 0 | 0 | 0 | 3 |
| Cluster2474; Proteobac Betapr Burkl Burkhol Burkholderia      | 0 | 1 | 1 | 0 | 0 | 0 | 0 | 0 | 0 | 0 | 0 | 1 | 3 |
| Cluster2503;size=9                                            | 0 | 0 | 0 | 0 | 0 | 0 | 0 | 1 | 0 | 1 | 0 | 1 | 3 |
| Cluster2573; Proteobac Gamm Legio Coxiella Aquicella          | 0 | 0 | 0 | 0 | 2 | 0 | 1 | 0 | 0 | 0 | 0 | 0 | 3 |
| Cluster2609; Acidobact Acidobacteria_Gp3                      | 0 | 0 | 0 | 0 | 1 | 0 | 1 | 0 | 0 | 0 | 0 | 1 | 3 |
| Cluster2676; Acidobact Acidobacteria_Gp1 Gp1                  | 0 | 2 | 0 | 0 | 0 | 0 | 0 | 0 | 1 | 0 | 0 | 0 | 3 |
| Cluster2704; Acidobact Acidobacteria_Gp2 Gp2                  | 0 | 0 | 0 | 0 | 0 | 0 | 0 | 2 | 0 | 0 | 0 | 1 | 3 |
| Cluster2717; Chloroflex Ktedor Ktedonobacterales              | 0 | 2 | 0 | 0 | 0 | 0 | 1 | 0 | 0 | 0 | 0 | 0 | 3 |
| Cluster2781; Chloroflex Ktedor Ktedc Thermo Thermosporot      | 0 | 0 | 1 | 0 | 1 | 1 | 0 | 0 | 0 | 0 | 0 | 0 | 3 |
| Cluster2798; Acidobact Acidobacteria_Gp2 Gp2                  | 0 | 0 | 0 | 2 | 0 | 0 | 0 | 1 | 0 | 0 | 0 | 0 | 3 |
| Cluster2823;size=22                                           | 1 | 0 | 0 | 1 | 0 | 0 | 0 | 0 | 0 | 0 | 0 | 1 | 3 |
| Cluster2864; Actinobac Actinol Actin Streptomycetaceae        | 1 | 1 | 0 | 0 | 0 | 0 | 0 | 0 | 0 | 1 | 0 | 0 | 3 |
| Cluster2923; Armatimonadetes Armatimonade                     | 0 | 0 | 1 | 0 | 0 | 0 | 0 | 0 | 0 | 2 | 0 | 0 | 3 |
| Cluster2925; Planctom Planctc Planc Plancto Singulisphaera    | 0 | 0 | 0 | 0 | 1 | 0 | 1 | 1 | 0 | 0 | 0 | 0 | 3 |
| Cluster2931; Proteobac Alphap Rhizc Bradyrh Bradyrhizobiur    | 0 | 0 | 0 | 0 | 0 | 2 | 0 | 0 | 0 | 0 | 1 | 0 | 3 |
| Cluster2933; Proteobac Gamm Xantl Sinobac Steroidobacter      | 1 | 0 | 0 | 0 | 0 | 0 | 1 | 0 | 0 | 1 | 0 | 0 | 3 |
| Cluster2957; Acidobact Acidobacteria_Gp3 Gp3                  | 0 | 0 | 0 | 0 | 0 | 1 | 1 | 0 | 0 | 1 | 0 | 0 | 3 |
| Cluster3036; Acidobact Acidobacteria_Gp3 Gp3                  | 2 | 0 | 0 | 0 | 0 | 1 | 0 | 0 | 0 | 0 | 0 | 0 | 3 |
| Cluster3063; Acidobact Acidobacteria_Gp1 Gp1                  | 0 | 0 | 0 | 1 | 1 | 0 | 0 | 0 | 1 | 0 | 0 | 0 | 3 |
| Cluster3076;size=11                                           | 0 | 0 | 0 | 0 | 0 | 0 | 0 | 0 | 0 | 1 | 0 | 2 | 3 |
| Cluster3141;size=25                                           | 0 | 0 | 0 | 0 | 0 | 0 | 0 | 1 | 0 | 1 | 0 | 1 | 3 |
| Cluster3191; Acidobact Acidobacteria_Gp2 Gp2                  | 0 | 0 | 0 | 0 | 0 | 0 | 0 | 0 | 0 | 1 | 2 | 0 | 3 |
| Cluster3217; Proteobac Alphaproteobacteria                    | 0 | 0 | 0 | 0 | 0 | 1 | 0 | 0 | 0 | 0 | 0 | 2 | 3 |

|                                                             |   |   |   |   |   |   |   |   |   |   |   |   |   |
|-------------------------------------------------------------|---|---|---|---|---|---|---|---|---|---|---|---|---|
| Cluster3325; Acidobact Acidobacteria_Gp3                    | 0 | 0 | 1 | 1 | 0 | 0 | 0 | 0 | 0 | 0 | 0 | 1 | 3 |
| Cluster3352; Proteobac Alphap Rhizobiales                   | 0 | 1 | 0 | 0 | 0 | 0 | 0 | 1 | 0 | 1 | 0 | 0 | 3 |
| Cluster3363; Bacteroid Sphing Sphir Sphingo Mucilaginibact  | 0 | 0 | 0 | 0 | 0 | 2 | 0 | 1 | 0 | 0 | 0 | 0 | 3 |
| Cluster3378; Acidobact Acidobacteria_Gp2 Gp2                | 0 | 0 | 2 | 0 | 0 | 1 | 0 | 0 | 0 | 0 | 0 | 0 | 3 |
| Cluster3400; Proteobac Alphap Rhodospirillales              | 0 | 0 | 0 | 0 | 0 | 1 | 1 | 0 | 0 | 0 | 0 | 1 | 3 |
| Cluster3404;size=15                                         | 0 | 0 | 0 | 0 | 0 | 1 | 0 | 1 | 0 | 0 | 0 | 1 | 3 |
| Cluster3421; Proteobac Alphap Alphaproteok Rhizomicrobiu    | 0 | 0 | 0 | 0 | 0 | 1 | 1 | 0 | 1 | 0 | 0 | 0 | 3 |
| Cluster3427; Verrucom Subdivision3 Subdivision3_ξ           | 2 | 0 | 0 | 0 | 1 | 0 | 0 | 0 | 0 | 0 | 0 | 0 | 3 |
| Cluster3448; Planctom Planct Planct Plancto Singulisphaera  | 0 | 0 | 1 | 0 | 0 | 1 | 0 | 0 | 0 | 0 | 0 | 1 | 3 |
| Cluster3449;size=14                                         | 0 | 0 | 1 | 1 | 0 | 0 | 0 | 0 | 0 | 0 | 1 | 0 | 3 |
| Cluster3459; Proteobac Gamm Legio Coxiella Aquicella        | 0 | 2 | 0 | 0 | 0 | 0 | 0 | 0 | 0 | 0 | 0 | 1 | 3 |
| Cluster3474; Actinobac Actinol Acidimicrobiales             | 0 | 0 | 0 | 0 | 0 | 1 | 0 | 1 | 0 | 0 | 0 | 1 | 3 |
| Cluster3525;size=19                                         | 0 | 0 | 0 | 0 | 0 | 0 | 0 | 1 | 2 | 0 | 0 | 0 | 3 |
| Cluster3589; Actinobac Actinol Acidimicrobiales             | 0 | 0 | 0 | 0 | 1 | 0 | 1 | 1 | 0 | 0 | 0 | 0 | 3 |
| Cluster3638;size=20                                         | 0 | 0 | 0 | 0 | 0 | 2 | 0 | 0 | 0 | 0 | 0 | 1 | 3 |
| Cluster3652; Proteobac Alphap Rhizc Xantho Pseudolabrys     | 0 | 0 | 0 | 0 | 0 | 0 | 0 | 1 | 1 | 0 | 0 | 1 | 3 |
| Cluster3675; Planctom Phycis; Phyci Phycispl Phycisphaera   | 0 | 0 | 0 | 0 | 1 | 1 | 0 | 1 | 0 | 0 | 0 | 0 | 3 |
| Cluster3906; Acidobact Acidobacteria_Gp1 Granulicella       | 0 | 0 | 0 | 1 | 1 | 1 | 0 | 0 | 0 | 0 | 0 | 0 | 3 |
| Cluster3918; Proteobac Deltap Bdell Bdellovi Vampirovibrio  | 0 | 0 | 0 | 0 | 0 | 1 | 0 | 0 | 2 | 0 | 0 | 0 | 3 |
| Cluster3920;size=4                                          | 1 | 1 | 0 | 1 | 0 | 0 | 0 | 0 | 0 | 0 | 0 | 0 | 3 |
| Cluster3934; Verrucom Opitut; Opitu Opituta Opitutus        | 0 | 0 | 0 | 0 | 0 | 1 | 0 | 0 | 0 | 2 | 0 | 0 | 3 |
| Cluster3938; Chlorobi Ignavi; Ignav Ignavib; Ignavibacteriu | 0 | 0 | 0 | 0 | 0 | 1 | 1 | 0 | 0 | 0 | 1 | 0 | 3 |
| Cluster4022;size=11                                         | 0 | 1 | 0 | 1 | 0 | 0 | 0 | 0 | 0 | 0 | 0 | 1 | 3 |
| Cluster4156; Proteobac Alphap Rhodospirillales              | 0 | 1 | 0 | 0 | 0 | 1 | 1 | 0 | 0 | 0 | 0 | 0 | 3 |
| Cluster4318; Planctomycetes                                 | 0 | 0 | 0 | 0 | 0 | 0 | 1 | 1 | 1 | 0 | 0 | 0 | 3 |
| Cluster4458;size=14                                         | 0 | 0 | 0 | 1 | 0 | 0 | 0 | 0 | 1 | 0 | 0 | 1 | 3 |
| Cluster4472; Proteobacteria                                 | 0 | 0 | 0 | 0 | 0 | 0 | 1 | 1 | 1 | 0 | 0 | 0 | 3 |
| Cluster4484; Acidobact Acidobacteria_Gp1                    | 0 | 0 | 1 | 0 | 0 | 0 | 0 | 2 | 0 | 0 | 0 | 0 | 3 |
| Cluster4509; Proteobac Alphap Rhodospirillales              | 0 | 0 | 0 | 1 | 0 | 0 | 1 | 0 | 0 | 0 | 1 | 0 | 3 |

|                                                             |   |   |   |   |   |   |   |   |   |   |   |   |   |
|-------------------------------------------------------------|---|---|---|---|---|---|---|---|---|---|---|---|---|
| Cluster4549; Bacteroid Sphing Sphir Chitinophagaceae        | 0 | 1 | 0 | 0 | 0 | 0 | 0 | 1 | 0 | 0 | 0 | 1 | 3 |
| Cluster4713; Verrucom Opitut; Opitu Opituta Opitutus        | 0 | 1 | 0 | 0 | 0 | 0 | 0 | 0 | 0 | 0 | 0 | 2 | 3 |
| Cluster4758; Verrucom Subdivision3 Subdivision3_ξ           | 0 | 0 | 0 | 2 | 0 | 0 | 0 | 0 | 0 | 1 | 0 | 0 | 3 |
| Cluster4760; Verrucom Subdivision3 Subdivision3_ξ           | 0 | 0 | 1 | 0 | 1 | 0 | 0 | 0 | 0 | 1 | 0 | 0 | 3 |
| Cluster4767; Acidobact Acidobacteria_Gp1                    | 0 | 0 | 0 | 1 | 0 | 0 | 1 | 0 | 0 | 0 | 1 | 0 | 3 |
| Cluster4773; Proteobac Alphaproteobacteria                  | 0 | 0 | 0 | 0 | 1 | 1 | 0 | 0 | 0 | 1 | 0 | 0 | 3 |
| Cluster4814; Proteobac Alphap Rhod Rhodos  Dongia           | 0 | 0 | 0 | 0 | 0 | 0 | 0 | 0 | 0 | 2 | 1 | 0 | 3 |
| Cluster4848; Acidobact Acidobacteria_Gp2 Gp2                | 1 | 1 | 0 | 0 | 0 | 0 | 0 | 1 | 0 | 0 | 0 | 0 | 3 |
| Cluster4872; Verrucom Subdivision3 Subdivision3_ξ           | 0 | 1 | 0 | 0 | 1 | 0 | 0 | 0 | 1 | 0 | 0 | 0 | 3 |
| Cluster4952; Acidobact Acidobacteria_Gp1                    | 0 | 0 | 1 | 0 | 0 | 0 | 0 | 0 | 0 | 2 | 0 | 0 | 3 |
| Cluster5130; Proteobac Alphap Rhizc Bradyrh Bradyrhizobiur  | 0 | 0 | 0 | 0 | 1 | 0 | 0 | 1 | 1 | 0 | 0 | 0 | 3 |
| Cluster5168; Proteobac Alphap Rhodospirillales              | 0 | 0 | 1 | 0 | 1 | 0 | 1 | 0 | 0 | 0 | 0 | 0 | 3 |
| Cluster5204; Verrucom Subdivision3 Subdivision3_ξ           | 0 | 0 | 0 | 0 | 0 | 1 | 0 | 1 | 0 | 0 | 0 | 1 | 3 |
| Cluster5331; Actinobac Actinol Acidi Acidimi Aciditerrimona | 1 | 1 | 1 | 0 | 0 | 0 | 0 | 0 | 0 | 0 | 0 | 0 | 3 |
| Cluster5379; Actinobac Actinobacteria                       | 0 | 0 | 0 | 0 | 1 | 0 | 1 | 0 | 0 | 0 | 0 | 1 | 3 |
| Cluster5439; Proteobac Gammaproteobacteria                  | 0 | 0 | 0 | 0 | 1 | 0 | 1 | 0 | 1 | 0 | 0 | 0 | 3 |
| Cluster5459; Proteobac Betapr Rhod Rhodocyclaceae           | 0 | 0 | 1 | 0 | 0 | 0 | 0 | 0 | 1 | 0 | 1 | 0 | 3 |
| Cluster5471; Proteobac Alphap Rhodospirillales              | 1 | 0 | 0 | 1 | 0 | 0 | 0 | 0 | 1 | 0 | 0 | 0 | 3 |
| Cluster5563; Proteobac Alphap Rhizobiales                   | 0 | 1 | 0 | 1 | 0 | 0 | 0 | 0 | 0 | 0 | 0 | 1 | 3 |
| Cluster5589; Planctomycetes                                 | 0 | 0 | 0 | 1 | 0 | 0 | 0 | 0 | 1 | 1 | 0 | 0 | 3 |
| Cluster5602; Proteobac Alphap Rhizc Rhizobi; Bauldia        | 0 | 0 | 0 | 1 | 0 | 0 | 0 | 1 | 0 | 0 | 1 | 0 | 3 |
| Cluster5651; Acidobact Acidobacteria_Gp1                    | 0 | 0 | 1 | 0 | 0 | 0 | 1 | 0 | 0 | 1 | 0 | 0 | 3 |
| Cluster5712; Proteobac Alphap Rhizc Bradyrh Bradyrhizobiur  | 1 | 1 | 0 | 0 | 0 | 0 | 0 | 0 | 0 | 1 | 0 | 0 | 3 |
| Cluster5747;size=11                                         | 1 | 0 | 0 | 0 | 0 | 1 | 0 | 1 | 0 | 0 | 0 | 0 | 3 |
| Cluster5798; Proteobac Alphap Rhizc Hyphon Rhodoplanes      | 0 | 0 | 1 | 0 | 0 | 0 | 2 | 0 | 0 | 0 | 0 | 0 | 3 |
| Cluster5806; Acidobact Acidobacteria_Gp3 Gp3                | 0 | 0 | 2 | 0 | 0 | 0 | 1 | 0 | 0 | 0 | 0 | 0 | 3 |
| Cluster5825; Proteobac Alphap Rhizobiales                   | 1 | 0 | 0 | 1 | 0 | 0 | 1 | 0 | 0 | 0 | 0 | 0 | 3 |
| Cluster5849;size=9                                          | 0 | 0 | 0 | 0 | 0 | 0 | 0 | 0 | 0 | 3 | 0 | 0 | 3 |
| Cluster5886; Verrucom Opitut; Opitu Opituta Opitutus        | 0 | 0 | 0 | 0 | 0 | 0 | 0 | 0 | 0 | 3 | 0 | 0 | 3 |

|                                                              |   |   |   |   |   |   |   |   |   |   |   |   |   |
|--------------------------------------------------------------|---|---|---|---|---|---|---|---|---|---|---|---|---|
| Cluster5902; Actinobac Actinol Acidi Acidimii Aciditerrimona | 0 | 2 | 0 | 0 | 0 | 0 | 0 | 0 | 0 | 0 | 0 | 1 | 3 |
| Cluster5933;size=14                                          | 0 | 3 | 0 | 0 | 0 | 0 | 0 | 0 | 0 | 0 | 0 | 0 | 3 |
| Cluster5934;size=3                                           | 1 | 0 | 0 | 2 | 0 | 0 | 0 | 0 | 0 | 0 | 0 | 0 | 3 |
| Cluster5998; Proteobac Deltap Myxc Cystobacteraceae          | 0 | 1 | 0 | 0 | 0 | 1 | 0 | 0 | 0 | 0 | 1 | 0 | 3 |
| Cluster6028; Acidobact Acidobacteria_Gp1                     | 0 | 0 | 1 | 0 | 1 | 0 | 0 | 0 | 0 | 1 | 0 | 0 | 3 |
| Cluster6290; Proteobac Alphap Rhodospirillales               | 0 | 0 | 0 | 0 | 0 | 1 | 0 | 1 | 0 | 0 | 1 | 0 | 3 |
| Cluster6299; Proteobac Betapr Rhod Rhodocyclaceae            | 0 | 0 | 1 | 1 | 0 | 0 | 0 | 0 | 1 | 0 | 0 | 0 | 3 |
| Cluster6369; Acidobact Acidobacteria_Gp2 Gp2                 | 0 | 0 | 1 | 2 | 0 | 0 | 0 | 0 | 0 | 0 | 0 | 0 | 3 |
| Cluster6441; Acidobact Acidobacteria_Gp3                     | 0 | 1 | 0 | 0 | 0 | 0 | 1 | 0 | 1 | 0 | 0 | 0 | 3 |
| Cluster6687; Proteobac Deltaproteobacteria                   | 0 | 2 | 0 | 0 | 1 | 0 | 0 | 0 | 0 | 0 | 0 | 0 | 3 |
| Cluster6701; Verrucom Subdivision3 Subdivision3_ξ            | 0 | 0 | 1 | 0 | 0 | 1 | 0 | 0 | 0 | 0 | 1 | 0 | 3 |
| Cluster6718;size=6                                           | 1 | 0 | 0 | 0 | 0 | 2 | 0 | 0 | 0 | 0 | 0 | 0 | 3 |
| Cluster6801; Proteobac Alphap Rhizobiales                    | 0 | 0 | 0 | 0 | 0 | 0 | 0 | 0 | 1 | 1 | 0 | 1 | 3 |
| Cluster6919; Acidobact Acidobacteria_Gp2 Gp2                 | 0 | 0 | 0 | 1 | 0 | 0 | 0 | 1 | 0 | 0 | 0 | 1 | 3 |
| Cluster6993; Acidobact Acidobacteria_Gp3 Gp3                 | 0 | 0 | 0 | 0 | 1 | 0 | 0 | 1 | 0 | 0 | 0 | 1 | 3 |
| Cluster7266; Acidobact Acidobacteria_Gp1                     | 0 | 0 | 0 | 0 | 1 | 1 | 0 | 0 | 0 | 0 | 1 | 0 | 3 |
| Cluster7313; Proteobac Deltaproteobacteria                   | 1 | 0 | 0 | 0 | 0 | 0 | 1 | 0 | 0 | 0 | 1 | 0 | 3 |
| Cluster7458; Proteobac Deltap Myxococcales                   | 0 | 0 | 0 | 0 | 0 | 3 | 0 | 0 | 0 | 0 | 0 | 0 | 3 |
| Cluster7468; Chlamydi Chlamy Chlar Parachlamydiaceae         | 0 | 0 | 2 | 1 | 0 | 0 | 0 | 0 | 0 | 0 | 0 | 0 | 3 |
| Cluster7552; Verrucom Subdivision3 Subdivision3_ξ            | 0 | 0 | 2 | 1 | 0 | 0 | 0 | 0 | 0 | 0 | 0 | 0 | 3 |
| Cluster7603; Acidobact Acidobacteria_Gp1 Gp1                 | 0 | 1 | 1 | 0 | 0 | 0 | 0 | 0 | 1 | 0 | 0 | 0 | 3 |
| Cluster7638; Proteobac Betapr Burkl Burkhol Burkholderia     | 0 | 0 | 3 | 0 | 0 | 0 | 0 | 0 | 0 | 0 | 0 | 0 | 3 |
| Cluster7645; Proteobac Deltap Bdelel Bdelelovi Bdelelovibrio | 0 | 1 | 1 | 0 | 0 | 0 | 0 | 0 | 0 | 1 | 0 | 0 | 3 |
| Cluster7793; Verrucom Subdivision3 Subdivision3_ξ            | 0 | 0 | 0 | 0 | 1 | 0 | 1 | 0 | 0 | 1 | 0 | 0 | 3 |
| Cluster7802; Proteobac Betapr Burkl Oxalobacteraceae         | 0 | 0 | 0 | 0 | 0 | 1 | 0 | 1 | 0 | 1 | 0 | 0 | 3 |
| Cluster8067; Proteobac Alphap Rhodospirillales               | 0 | 0 | 0 | 0 | 0 | 0 | 2 | 0 | 0 | 1 | 0 | 0 | 3 |
| Cluster8136; Acidobact Acidobacteria_Gp1                     | 0 | 0 | 1 | 0 | 0 | 0 | 0 | 0 | 0 | 2 | 0 | 0 | 3 |
| Cluster8186; Proteobac Alphap Rhizc Bradyrhizobiaceae        | 0 | 0 | 2 | 0 | 1 | 0 | 0 | 0 | 0 | 0 | 0 | 0 | 3 |
| Cluster8272; Acidobact Acidobacteria_Gp1 Gp1                 | 0 | 0 | 0 | 0 | 1 | 0 | 2 | 0 | 0 | 0 | 0 | 0 | 3 |



|                                                            |   |   |   |   |   |   |   |   |   |   |   |   |
|------------------------------------------------------------|---|---|---|---|---|---|---|---|---|---|---|---|
| Cluster8296;size=4                                         | 1 | 0 | 0 | 0 | 0 | 1 | 0 | 0 | 0 | 0 | 1 | 3 |
| Cluster8328; Acidobact Acidobacteria_Gp1 Acidobacteriur    | 0 | 0 | 0 | 0 | 0 | 1 | 1 | 0 | 0 | 0 | 1 | 3 |
| Cluster8419; Proteobac Alphap Rhodospirillales             | 1 | 0 | 0 | 1 | 0 | 0 | 1 | 0 | 0 | 0 | 0 | 3 |
| Cluster8468; Proteobac Deltaproteobacteria                 | 0 | 0 | 0 | 0 | 0 | 1 | 0 | 0 | 1 | 0 | 1 | 3 |
| Cluster8473; Proteobac Alphaproteobacteria                 | 0 | 0 | 0 | 0 | 1 | 0 | 0 | 0 | 0 | 0 | 2 | 3 |
| Cluster8480; Proteobac Alphap Rhodospirillales             | 0 | 1 | 0 | 1 | 0 | 0 | 0 | 0 | 0 | 0 | 1 | 3 |
| Cluster8553; Acidobact Acidobacteria_Gp1                   | 1 | 0 | 0 | 0 | 2 | 0 | 0 | 0 | 0 | 0 | 0 | 3 |
| Cluster8637; Proteobac Deltap Myxc Cystobacteraceae        | 0 | 0 | 0 | 0 | 0 | 0 | 1 | 0 | 0 | 1 | 1 | 3 |
| Cluster8650; Acidobacteria                                 | 0 | 0 | 2 | 1 | 0 | 0 | 0 | 0 | 0 | 0 | 0 | 3 |
| Cluster8662; Proteobac Alphap Rhodospirillales             | 0 | 0 | 0 | 0 | 2 | 0 | 0 | 0 | 1 | 0 | 0 | 3 |
| Cluster8721; Verrucom Opitut; Opitu Opituta Opitutus       | 0 | 0 | 0 | 0 | 0 | 1 | 0 | 0 | 0 | 2 | 0 | 3 |
| Cluster8732;size=3                                         | 0 | 0 | 0 | 0 | 1 | 0 | 1 | 0 | 0 | 0 | 1 | 3 |
| Cluster8827; Proteobac Alphap Rhodospirillales             | 0 | 0 | 0 | 0 | 1 | 0 | 1 | 0 | 0 | 0 | 0 | 3 |
| Cluster8834; Acidobact Acidobacteria_Gp2 Gp2               | 0 | 1 | 0 | 0 | 0 | 0 | 0 | 0 | 1 | 0 | 1 | 3 |
| Cluster8922; Acidobact Acidobacteria_Gp2 Gp2               | 0 | 2 | 0 | 0 | 0 | 0 | 0 | 1 | 0 | 0 | 0 | 3 |
| Cluster8997; Acidobact Acidobacteria_Gp2 Gp2               | 0 | 0 | 1 | 1 | 0 | 0 | 0 | 1 | 0 | 0 | 0 | 3 |
| Cluster9031; Acidobact Acidobacteria_Gp2 Gp2               | 0 | 0 | 0 | 0 | 0 | 1 | 1 | 0 | 0 | 0 | 0 | 3 |
| Cluster9068;size=13                                        | 0 | 1 | 0 | 0 | 0 | 0 | 0 | 0 | 1 | 0 | 0 | 3 |
| Cluster9119; Proteobac Alphaproteobacteria                 | 0 | 0 | 0 | 0 | 0 | 0 | 1 | 2 | 0 | 0 | 0 | 3 |
| Cluster9139; Proteobac Betapr Burkholderiales              | 0 | 0 | 0 | 1 | 0 | 0 | 1 | 1 | 0 | 0 | 0 | 3 |
| Cluster9164; Bacteroid Sphing Sphir Sphingo Mucilaginibact | 0 | 1 | 0 | 1 | 0 | 0 | 0 | 1 | 0 | 0 | 0 | 3 |
| Cluster9235;size=38                                        | 0 | 1 | 0 | 0 | 0 | 0 | 0 | 0 | 0 | 1 | 1 | 3 |
| Cluster9328;size=5                                         | 1 | 0 | 0 | 0 | 0 | 0 | 0 | 1 | 0 | 0 | 1 | 3 |
| Cluster9329; Actinobac Actinol Actin Mycoba Mycobacteriur  | 0 | 0 | 2 | 1 | 0 | 0 | 0 | 0 | 0 | 0 | 0 | 3 |
| Cluster9351; Proteobac Deltap Myxococcales                 | 0 | 2 | 0 | 0 | 0 | 0 | 0 | 0 | 0 | 0 | 1 | 3 |
| Cluster9482; Acidobact Acidobacteria_Gp3 Gp3               | 1 | 0 | 1 | 0 | 0 | 0 | 1 | 0 | 0 | 0 | 0 | 3 |
| Cluster9536; Acidobact Acidobacteria_Gp1                   | 0 | 0 | 2 | 1 | 0 | 0 | 0 | 0 | 0 | 0 | 0 | 3 |
| Cluster9627; Proteobac Alphap Rhodospirillales             | 0 | 0 | 0 | 0 | 0 | 0 | 3 | 0 | 0 | 0 | 0 | 3 |
| Cluster9634; Acidobacteria                                 | 0 | 0 | 0 | 1 | 1 | 0 | 0 | 0 | 0 | 0 | 1 | 3 |

|                                                             |   |   |   |   |   |   |   |   |   |   |   |   |   |
|-------------------------------------------------------------|---|---|---|---|---|---|---|---|---|---|---|---|---|
| Cluster9643; Proteobac Betaproteobacteria                   | 1 | 1 | 0 | 0 | 0 | 0 | 0 | 0 | 0 | 0 | 0 | 1 | 3 |
| Cluster9675; Bacteroid Sphing Sphir Chitinophagaceae        | 1 | 0 | 0 | 0 | 0 | 0 | 0 | 2 | 0 | 0 | 0 | 0 | 3 |
| Cluster9689; Acidobact Acidobacteria_Gp1                    | 1 | 0 | 0 | 0 | 0 | 0 | 0 | 0 | 2 | 0 | 0 | 0 | 3 |
| Cluster9749; Bacteroid Sphing Sphir Sphingo Mucilagibact    | 0 | 0 | 1 | 0 | 1 | 0 | 0 | 0 | 0 | 1 | 0 | 0 | 3 |
| Cluster9784; Actinobac Actinol Actin Propion Propionibacter | 1 | 0 | 0 | 0 | 0 | 0 | 0 | 1 | 0 | 0 | 0 | 1 | 3 |
| Cluster9895;size=5                                          | 0 | 0 | 2 | 0 | 0 | 0 | 1 | 0 | 0 | 0 | 0 | 0 | 3 |
| Cluster10237 Acidobact Acidobacteria_Gp1                    | 0 | 0 | 2 | 1 | 0 | 0 | 0 | 0 | 0 | 0 | 0 | 0 | 3 |
| Cluster10437 Acidobact Acidobacteria_Gp2 Gp2                | 0 | 0 | 0 | 0 | 0 | 0 | 1 | 1 | 0 | 0 | 1 | 0 | 3 |
| Cluster10566 Acidobact Acidobacteria_Gp3                    | 0 | 0 | 0 | 1 | 1 | 0 | 0 | 0 | 0 | 0 | 0 | 1 | 3 |
| Cluster10579 Acidobact Acidobacteria_Gp1 Gp1                | 0 | 0 | 0 | 0 | 1 | 0 | 1 | 1 | 0 | 0 | 0 | 0 | 3 |
| Cluster10601 Acidobacteria                                  | 1 | 0 | 0 | 0 | 0 | 2 | 0 | 0 | 0 | 0 | 0 | 0 | 3 |
| Cluster10773;size=4                                         | 0 | 0 | 0 | 0 | 0 | 1 | 2 | 0 | 0 | 0 | 0 | 0 | 3 |
| Cluster10809 Acidobact Acidobacteria_Gp3                    | 0 | 0 | 0 | 1 | 0 | 0 | 0 | 1 | 0 | 0 | 1 | 0 | 3 |
| Cluster10847 Acidobact Acidobacteria_Gp1 Gp1                | 0 | 0 | 0 | 1 | 0 | 0 | 1 | 0 | 0 | 1 | 0 | 0 | 3 |
| Cluster10848 Proteobac Deltap Myxococcales                  | 0 | 0 | 1 | 0 | 0 | 0 | 1 | 0 | 0 | 0 | 0 | 1 | 3 |
| Cluster10960 Acidobact Acidobacteria_Gp3 Gp3                | 0 | 0 | 0 | 0 | 1 | 1 | 0 | 0 | 1 | 0 | 0 | 0 | 3 |
| Cluster11133 Acidobact Acidobacteria_Gp3 Gp3                | 0 | 0 | 0 | 1 | 0 | 0 | 0 | 0 | 0 | 2 | 0 | 0 | 3 |
| Cluster11268 Proteobac Deltaproteobacteria                  | 0 | 1 | 0 | 0 | 0 | 1 | 1 | 0 | 0 | 0 | 0 | 0 | 3 |
| Cluster11295 Gemmatir Gemm Gemı Gemma Gemmatimonad          | 0 | 0 | 0 | 0 | 2 | 0 | 0 | 0 | 0 | 1 | 0 | 0 | 3 |
| Cluster11467 Proteobac Alphap Rhizobiales                   | 0 | 1 | 0 | 0 | 0 | 0 | 0 | 0 | 1 | 0 | 1 | 0 | 3 |
| Cluster11654 Proteobac Deltap Myxococcales                  | 0 | 0 | 0 | 0 | 0 | 0 | 0 | 1 | 2 | 0 | 0 | 0 | 3 |
| Cluster11670 Acidobact Acidobacteria_Gp2 Gp2                | 0 | 0 | 0 | 0 | 0 | 0 | 2 | 1 | 0 | 0 | 0 | 0 | 3 |
| Cluster11682 Acidobact Acidobacteria_Gp10 Gp10              | 0 | 0 | 0 | 1 | 0 | 0 | 0 | 0 | 1 | 0 | 1 | 0 | 3 |
| Cluster11805;size=14                                        | 0 | 1 | 0 | 0 | 0 | 0 | 2 | 0 | 0 | 0 | 0 | 0 | 3 |
| Cluster11848;size=10                                        | 0 | 1 | 0 | 0 | 0 | 0 | 0 | 0 | 0 | 0 | 2 | 0 | 3 |
| Cluster11905 Acidobact Acidobacteria_Gp1 Acidobacteriur     | 0 | 0 | 1 | 0 | 0 | 0 | 1 | 1 | 0 | 0 | 0 | 0 | 3 |
| Cluster11941 Acidobact Acidobacteria_Gp1                    | 0 | 0 | 1 | 0 | 0 | 0 | 1 | 0 | 1 | 0 | 0 | 0 | 3 |
| Cluster11958 Acidobact Acidobacteria_Gp1 Granulicella       | 0 | 0 | 0 | 0 | 0 | 0 | 0 | 0 | 0 | 1 | 1 | 1 | 3 |
| Cluster12057 Armatimonadetes Armatimonade                   | 0 | 0 | 0 | 0 | 1 | 0 | 0 | 0 | 1 | 1 | 0 | 0 | 3 |

|              |               |                                     |   |   |   |   |   |   |   |   |   |   |   |   |   |
|--------------|---------------|-------------------------------------|---|---|---|---|---|---|---|---|---|---|---|---|---|
| Cluster12149 | Acidobact     | Acidobacteria_Gp1                   | 0 | 1 | 1 | 0 | 0 | 0 | 0 | 1 | 0 | 0 | 0 | 3 |   |
| Cluster12182 | Acidobact     | Acidobacteria_Gp1 Gp1               | 0 | 0 | 1 | 0 | 0 | 1 | 0 | 0 | 0 | 1 | 0 | 3 |   |
| Cluster12206 | Acidobact     | Acidobacteria_Gp3 Gp3               | 0 | 0 | 0 | 0 | 0 | 2 | 0 | 0 | 1 | 0 | 0 | 3 |   |
| Cluster12487 | Gemmatir      | Gemm Gemı Gemma Gemmatimonas        | 0 | 0 | 0 | 0 | 0 | 1 | 0 | 0 | 1 | 0 | 1 | 0 | 3 |
| Cluster12499 | Proteobac     | Betapr Burkl Burkhol Burkholderia   | 0 | 0 | 0 | 0 | 0 | 0 | 1 | 0 | 0 | 2 | 0 | 0 | 3 |
| Cluster12607 | Acidobact     | Acidobacteria_Gp1 Gp1               | 0 | 0 | 2 | 0 | 1 | 0 | 0 | 0 | 0 | 0 | 0 | 0 | 3 |
| Cluster12640 | Acidobacteria |                                     | 0 | 0 | 0 | 2 | 0 | 0 | 0 | 0 | 0 | 0 | 1 | 0 | 3 |
| Cluster12676 | Acidobact     | Acidobacteria_Gp1 Gp1               | 0 | 0 | 0 | 0 | 0 | 0 | 0 | 1 | 0 | 0 | 0 | 2 | 3 |
| Cluster12902 | Actinobac     | Actinol Acidimicrobiales            | 0 | 0 | 0 | 0 | 1 | 0 | 0 | 0 | 0 | 1 | 0 | 1 | 3 |
| Cluster13040 | Acidobact     | Acidobacteria_Gp3 Bryobacter        | 0 | 0 | 1 | 1 | 0 | 0 | 1 | 0 | 0 | 0 | 0 | 0 | 3 |
| Cluster13117 | Proteobac     | Gamm Xantl Sinobac Steroidobacter   | 0 | 0 | 1 | 2 | 0 | 0 | 0 | 0 | 0 | 0 | 0 | 0 | 3 |
| Cluster13182 | ;size=3       |                                     | 0 | 0 | 2 | 0 | 0 | 0 | 0 | 0 | 0 | 0 | 1 | 0 | 3 |
| Cluster13424 | Acidobact     | Acidobacteria_Gp1 Gp1               | 0 | 0 | 0 | 1 | 0 | 0 | 1 | 0 | 0 | 0 | 0 | 1 | 3 |
| Cluster13686 | Proteobac     | Gamm Xantl Sinobac Nevskia          | 0 | 0 | 1 | 0 | 1 | 0 | 0 | 0 | 0 | 0 | 0 | 1 | 3 |
| Cluster13747 | Actinobac     | Actinol Solirt Conexib Conexibacter | 0 | 0 | 0 | 0 | 0 | 0 | 0 | 0 | 0 | 1 | 2 | 0 | 3 |
| Cluster13851 | Acidobact     | Acidobacteria_Gp2 Gp2               | 0 | 0 | 1 | 0 | 1 | 0 | 0 | 0 | 0 | 0 | 1 | 0 | 3 |
| Cluster13876 | Proteobac     | Deltap Myxococcales                 | 0 | 0 | 0 | 0 | 0 | 2 | 0 | 0 | 0 | 0 | 0 | 1 | 3 |
| Cluster13950 | Acidobacteria |                                     | 0 | 0 | 1 | 0 | 0 | 0 | 1 | 0 | 0 | 0 | 1 | 0 | 3 |
| Cluster14172 | ;size=9       |                                     | 0 | 0 | 0 | 0 | 0 | 0 | 0 | 0 | 0 | 3 | 0 | 0 | 3 |
| Cluster14198 | Acidobact     | Acidobacteria_Gp2 Gp2               | 0 | 0 | 1 | 1 | 0 | 0 | 0 | 0 | 0 | 0 | 1 | 0 | 3 |
| Cluster14212 | Acidobact     | Acidobacteria_Gp1 Gp1               | 2 | 0 | 1 | 0 | 0 | 0 | 0 | 0 | 0 | 0 | 0 | 0 | 3 |
| Cluster14411 | Acidobact     | Acidobacteria_Gp3 Gp3               | 0 | 1 | 0 | 0 | 0 | 1 | 1 | 0 | 0 | 0 | 0 | 0 | 3 |
| Cluster14424 | Acidobact     | Acidobacteria_Gp1                   | 1 | 0 | 0 | 0 | 2 | 0 | 0 | 0 | 0 | 0 | 0 | 0 | 3 |
| Cluster14514 | Acidobact     | Acidobacteria_Gp1                   | 0 | 0 | 1 | 1 | 0 | 1 | 0 | 0 | 0 | 0 | 0 | 0 | 3 |
| Cluster14524 | Acidobact     | Acidobacteria_Gp2 Gp2               | 0 | 1 | 0 | 1 | 1 | 0 | 0 | 0 | 0 | 0 | 0 | 0 | 3 |
| Cluster14554 | ;size=15      |                                     | 0 | 0 | 0 | 1 | 2 | 0 | 0 | 0 | 0 | 0 | 0 | 0 | 3 |
| Cluster14580 | Acidobact     | Acidobacteria_Gp1 Gp1               | 0 | 1 | 0 | 1 | 0 | 0 | 0 | 0 | 0 | 0 | 1 | 0 | 3 |
| Cluster14595 | Acidobact     | Acidobacteria_Gp2 Gp2               | 0 | 0 | 0 | 0 | 0 | 0 | 0 | 2 | 1 | 0 | 0 | 0 | 3 |
| Cluster14628 | Acidobact     | Acidobacteria_Gp2 Gp2               | 0 | 0 | 0 | 0 | 0 | 0 | 0 | 1 | 1 | 0 | 0 | 1 | 3 |

|              |                |                     |                 |   |   |   |   |   |   |   |   |   |   |   |   |   |
|--------------|----------------|---------------------|-----------------|---|---|---|---|---|---|---|---|---|---|---|---|---|
| Cluster14654 | Acidobact      | Acidobacteria_Gp2   | Gp2             | 0 | 0 | 0 | 1 | 0 | 0 | 0 | 0 | 1 | 0 | 1 | 0 | 3 |
| Cluster14755 | Acidobact      | Acidobacteria_Gp1   | Gp1             | 0 | 0 | 0 | 0 | 2 | 1 | 0 | 0 | 0 | 0 | 0 | 0 | 3 |
| Cluster14772 | Actinobac      | Actinob             | Actinomycetales | 0 | 0 | 0 | 0 | 0 | 0 | 0 | 2 | 1 | 0 | 0 | 0 | 3 |
| Cluster14848 | Acidobact      | Acidobacteria_Gp1   | Gp1             | 0 | 1 | 0 | 0 | 0 | 0 | 0 | 2 | 0 | 0 | 0 | 0 | 3 |
| Cluster14900 | Acidobacteria  |                     |                 | 0 | 0 | 1 | 0 | 1 | 0 | 0 | 0 | 0 | 0 | 0 | 1 | 3 |
| Cluster14911 | Acidobact      | Acidobacteria_Gp2   | Gp2             | 0 | 0 | 0 | 0 | 0 | 0 | 1 | 2 | 0 | 0 | 0 | 0 | 3 |
| Cluster14927 | Proteobac      | Alphap              | Rhizobiales     | 0 | 0 | 0 | 0 | 0 | 0 | 2 | 0 | 0 | 0 | 0 | 1 | 3 |
| Cluster15004 | Chloroflex     | Ktedor              | Ktedo           | 0 | 0 | 0 | 0 | 0 | 0 | 0 | 2 | 0 | 0 | 1 | 0 | 3 |
| Cluster15030 | Proteobac      | Deltap              | Bdell           | 0 | 0 | 0 | 0 | 0 | 0 | 0 | 0 | 0 | 3 | 0 | 0 | 3 |
| Cluster15139 | Acidobact      | Acidobacteria_Gp2   | Gp2             | 0 | 0 | 0 | 0 | 0 | 0 | 0 | 0 | 3 | 0 | 0 | 0 | 3 |
| Cluster15178 | Acidobact      | Acidobacteria_Gp2   | Gp2             | 0 | 0 | 1 | 1 | 0 | 0 | 0 | 1 | 0 | 0 | 0 | 0 | 3 |
| Cluster15197 | ;size=15       |                     |                 | 0 | 0 | 0 | 0 | 1 | 0 | 0 | 0 | 1 | 0 | 0 | 1 | 3 |
| Cluster15208 | Acidobact      | Acidobacteria_Gp1   | Gp1             | 1 | 0 | 0 | 0 | 0 | 1 | 0 | 0 | 0 | 0 | 0 | 1 | 3 |
| Cluster15210 | Acidobact      | Acidobacteria_Gp1   |                 | 0 | 0 | 0 | 1 | 0 | 0 | 0 | 0 | 0 | 0 | 0 | 2 | 3 |
| Cluster15299 | Acidobact      | Acidobacteria_Gp1   |                 | 0 | 2 | 0 | 0 | 0 | 0 | 0 | 1 | 0 | 0 | 0 | 0 | 3 |
| Cluster15544 | Firmicute:     | Bacilli             | Bacill          | 0 | 3 | 0 | 0 | 0 | 0 | 0 | 0 | 0 | 0 | 0 | 0 | 3 |
| Cluster15575 | Proteobac      | Alphap              | Rhizc           | 0 | 1 | 0 | 0 | 0 | 1 | 1 | 0 | 0 | 0 | 0 | 0 | 3 |
| Cluster15721 | Acidobact      | Acidobacteria_Gp1   | Granulicella    | 0 | 0 | 0 | 2 | 1 | 0 | 0 | 0 | 0 | 0 | 0 | 0 | 3 |
| Cluster15791 | ;size=10       |                     |                 | 0 | 1 | 0 | 0 | 0 | 0 | 1 | 1 | 0 | 0 | 0 | 0 | 3 |
| Cluster15861 | Acidobact      | Acidobacteria_Gp5   | Gp5             | 0 | 0 | 0 | 0 | 2 | 0 | 0 | 0 | 0 | 1 | 0 | 0 | 3 |
| Cluster15984 | Acidobact      | Acidobacteria_Gp1   | Gp1             | 0 | 0 | 0 | 0 | 1 | 0 | 0 | 0 | 2 | 0 | 0 | 0 | 3 |
| Cluster16030 | Gemmatir       | Gemm                | Gem             | 0 | 0 | 0 | 1 | 0 | 0 | 0 | 0 | 0 | 1 | 1 | 0 | 3 |
| Cluster16133 | Proteobac      | Betapr              | Burkl           | 0 | 0 | 2 | 0 | 1 | 0 | 0 | 0 | 0 | 0 | 0 | 0 | 3 |
| Cluster16247 | Acidobact      | Acidobacteria_Gp1   |                 | 0 | 0 | 1 | 2 | 0 | 0 | 0 | 0 | 0 | 0 | 0 | 0 | 3 |
| Cluster16321 | Acidobact      | Acidobacteria_Gp1   | Granulicella    | 0 | 0 | 2 | 0 | 0 | 0 | 0 | 0 | 0 | 1 | 0 | 0 | 3 |
| Cluster16416 | Acidobact      | Acidobacteria_Gp1   |                 | 0 | 0 | 1 | 1 | 0 | 0 | 0 | 0 | 0 | 0 | 1 | 0 | 3 |
| Cluster16571 | Proteobacteria |                     |                 | 2 | 0 | 0 | 0 | 1 | 0 | 0 | 0 | 0 | 0 | 0 | 0 | 3 |
| Cluster16671 | Proteobac      | Alphaproteobacteria |                 | 0 | 0 | 2 | 1 | 0 | 0 | 0 | 0 | 0 | 0 | 0 | 0 | 3 |
| Cluster16901 | Chlamydi:      | Chlamy              | Chlar           | 0 | 0 | 0 | 1 | 0 | 0 | 1 | 0 | 0 | 0 | 1 | 0 | 3 |

|                                                            |   |   |   |   |   |   |   |   |   |   |   |   |   |
|------------------------------------------------------------|---|---|---|---|---|---|---|---|---|---|---|---|---|
| Cluster17000;size=7                                        | 1 | 0 | 0 | 0 | 0 | 0 | 0 | 1 | 0 | 0 | 1 | 0 | 3 |
| Cluster17023;size=7                                        | 1 | 0 | 0 | 0 | 0 | 0 | 0 | 1 | 0 | 0 | 1 | 0 | 3 |
| Cluster17088 Proteobac Alphap Rhizobiales                  | 1 | 0 | 0 | 2 | 0 | 0 | 0 | 0 | 0 | 0 | 0 | 0 | 3 |
| Cluster17138 Acidobact Acidobacteria_Gp1                   | 0 | 0 | 0 | 1 | 0 | 1 | 0 | 0 | 0 | 0 | 0 | 1 | 3 |
| Cluster17175 Acidobact Acidobacteria_Gp1 Gp1               | 0 | 0 | 1 | 0 | 0 | 0 | 0 | 0 | 0 | 2 | 0 | 0 | 3 |
| Cluster17471 Acidobact Acidobacteria_Gp1 Gp1               | 0 | 0 | 0 | 0 | 0 | 0 | 0 | 0 | 0 | 3 | 0 | 0 | 3 |
| Cluster17492 Acidobact Acidobacteria_Gp1                   | 0 | 1 | 0 | 0 | 0 | 0 | 1 | 0 | 0 | 0 | 1 | 0 | 3 |
| Cluster17516 Proteobac Deltap Bdell Bdellovi Vampirovibrio | 0 | 1 | 0 | 0 | 0 | 0 | 0 | 0 | 1 | 0 | 0 | 1 | 3 |
| Cluster17680 Actinobac Actinol Solirl Conexib Conexibacter | 0 | 0 | 0 | 0 | 1 | 0 | 1 | 0 | 0 | 0 | 0 | 1 | 3 |
| Cluster17721 Acidobact Acidobacteria_Gp1 Gp1               | 0 | 0 | 1 | 1 | 0 | 0 | 0 | 0 | 0 | 0 | 1 | 0 | 3 |
| Cluster17731;size=5                                        | 0 | 0 | 0 | 0 | 0 | 1 | 0 | 2 | 0 | 0 | 0 | 0 | 3 |
| Cluster17817 Proteobac Gammaproteobacteria                 | 0 | 0 | 0 | 1 | 1 | 0 | 0 | 1 | 0 | 0 | 0 | 0 | 3 |
| Cluster18041 Proteobac Gamm Xantl Sinobac Steroidobacter   | 0 | 0 | 0 | 0 | 0 | 0 | 0 | 0 | 0 | 2 | 1 | 0 | 3 |
| Cluster18047;size=13                                       | 0 | 0 | 1 | 0 | 1 | 0 | 0 | 0 | 0 | 1 | 0 | 0 | 3 |
| Cluster18099 Proteobac Gamm Xantl Sinobac Steroidobacter   | 0 | 0 | 0 | 0 | 0 | 0 | 1 | 0 | 1 | 0 | 0 | 1 | 3 |
| Cluster18118 OP11 OP11_genera_                             | 1 | 1 | 0 | 0 | 0 | 0 | 1 | 0 | 0 | 0 | 0 | 0 | 3 |
| Cluster18122 Verrucom Opitut: Opitu Opituta Opitutus       | 0 | 0 | 1 | 0 | 0 | 1 | 0 | 0 | 0 | 0 | 1 | 0 | 3 |
| Cluster18208 Proteobac Alphap Rhizc Bradyrhizobiaceae      | 0 | 0 | 1 | 1 | 0 | 0 | 0 | 0 | 0 | 0 | 1 | 0 | 3 |
| Cluster18247 Acidobact Acidobacteria_Gp2 Gp2               | 0 | 0 | 0 | 0 | 0 | 0 | 1 | 1 | 0 | 0 | 1 | 0 | 3 |
| Cluster18383 Acidobact Acidobacteria_Gp2 Gp2               | 0 | 0 | 1 | 1 | 0 | 0 | 0 | 0 | 0 | 0 | 1 | 0 | 3 |
| Cluster18445 Actinobac Actinol Solirl Conexib Conexibacter | 0 | 1 | 0 | 0 | 0 | 0 | 0 | 0 | 0 | 0 | 2 | 0 | 3 |
| Cluster18482 Proteobac Alphaproteobacteria                 | 0 | 0 | 0 | 0 | 0 | 0 | 0 | 1 | 0 | 1 | 1 | 0 | 3 |
| Cluster18535 Acidobact Acidobacteria_Gp3 Gp3               | 0 | 0 | 0 | 0 | 2 | 0 | 0 | 0 | 1 | 0 | 0 | 0 | 3 |
| Cluster18565 Acidobact Acidobacteria_Gp2 Gp2               | 0 | 0 | 0 | 1 | 2 | 0 | 0 | 0 | 0 | 0 | 0 | 0 | 3 |
| Cluster18583 Acidobact Acidobacteria_Gp1                   | 0 | 0 | 1 | 1 | 1 | 0 | 0 | 0 | 0 | 0 | 0 | 0 | 3 |
| Cluster18628 Acidobact Acidobacteria_Gp2 Gp2               | 0 | 0 | 0 | 0 | 1 | 0 | 0 | 2 | 0 | 0 | 0 | 0 | 3 |
| Cluster18667 Proteobac Gammaproteobacteria                 | 1 | 0 | 0 | 0 | 0 | 0 | 1 | 0 | 0 | 0 | 0 | 1 | 3 |
| Cluster18757 Proteobac Alphap Rhizobiales                  | 0 | 1 | 0 | 0 | 0 | 0 | 0 | 0 | 0 | 0 | 1 | 1 | 3 |
| Cluster18769 Acidobact Acidobacteria_Gp1 Granulicella      | 0 | 0 | 0 | 0 | 1 | 1 | 0 | 0 | 0 | 0 | 0 | 1 | 3 |

|                                                              |   |   |   |   |   |   |   |   |   |   |   |   |   |
|--------------------------------------------------------------|---|---|---|---|---|---|---|---|---|---|---|---|---|
| Cluster1878C Acidobact Acidobacteria_Gp1 Gp1                 | 0 | 0 | 0 | 0 | 1 | 1 | 1 | 0 | 0 | 0 | 0 | 0 | 3 |
| Cluster1882C Acidobacteria                                   | 0 | 0 | 0 | 1 | 0 | 0 | 1 | 0 | 1 | 0 | 0 | 0 | 3 |
| Cluster1884E Acidobact Acidobacteria_Gp3                     | 0 | 1 | 0 | 0 | 0 | 0 | 0 | 0 | 0 | 1 | 0 | 1 | 3 |
| Cluster18854 Acidobact Acidobacteria_Gp3 Gp3                 | 0 | 0 | 0 | 0 | 0 | 2 | 0 | 0 | 0 | 1 | 0 | 0 | 3 |
| Cluster19002 Proteobac Alphap Rhod Acetobacteraceae          | 0 | 0 | 0 | 0 | 0 | 0 | 0 | 0 | 0 | 2 | 1 | 0 | 3 |
| Cluster19095 Acidobact Acidobacteria_Gp3 Gp3                 | 0 | 0 | 0 | 2 | 0 | 0 | 0 | 0 | 0 | 0 | 0 | 1 | 3 |
| Cluster1912E Acidobact Acidobacteria_Gp3 Gp3                 | 0 | 0 | 0 | 0 | 0 | 0 | 1 | 0 | 0 | 2 | 0 | 0 | 3 |
| Cluster19146;size=10                                         | 1 | 0 | 0 | 1 | 0 | 0 | 1 | 0 | 0 | 0 | 0 | 0 | 3 |
| Cluster1926C Acidobact Acidobacteria_Gp2 Gp2                 | 0 | 0 | 0 | 0 | 0 | 0 | 1 | 1 | 0 | 0 | 0 | 1 | 3 |
| Cluster1928C Acidobact Acidobacteria_Gp2 Gp2                 | 0 | 0 | 0 | 0 | 0 | 0 | 0 | 0 | 1 | 0 | 2 | 0 | 3 |
| Cluster19384 Acidobact Acidobacteria_Gp3 Bryobacter          | 0 | 0 | 0 | 0 | 0 | 0 | 0 | 1 | 1 | 0 | 1 | 0 | 3 |
| Cluster19495 Proteobac Alphap Caulc Caulobæ Phenylobacter    | 1 | 0 | 0 | 0 | 1 | 0 | 0 | 0 | 0 | 1 | 0 | 0 | 3 |
| Cluster1956E Acidobacteria                                   | 0 | 1 | 0 | 0 | 0 | 1 | 1 | 0 | 0 | 0 | 0 | 0 | 3 |
| Cluster1975C Proteobac Alphap Rhod Acetobacteraceae          | 0 | 0 | 2 | 0 | 0 | 0 | 0 | 0 | 0 | 1 | 0 | 0 | 3 |
| Cluster1976E Acidobact Acidobacteria_Gp3                     | 1 | 0 | 0 | 1 | 0 | 1 | 0 | 0 | 0 | 0 | 0 | 0 | 3 |
| Cluster19831 Acidobact Acidobacteria_Gp1                     | 0 | 0 | 0 | 2 | 0 | 0 | 0 | 0 | 0 | 0 | 0 | 1 | 3 |
| Cluster1985E Actinobac Actinol Actinomycetales               | 0 | 0 | 0 | 0 | 2 | 1 | 0 | 0 | 0 | 0 | 0 | 0 | 3 |
| Cluster19925 Acidobact Acidobacteria_Gp3 Gp3                 | 0 | 0 | 1 | 1 | 1 | 0 | 0 | 0 | 0 | 0 | 0 | 0 | 3 |
| Cluster19977 Proteobac Gamm Legio Legione Legionella         | 1 | 0 | 0 | 1 | 0 | 0 | 1 | 0 | 0 | 0 | 0 | 0 | 3 |
| Cluster20054 Acidobact Acidobacteria_Gp3 Gp3                 | 2 | 0 | 1 | 0 | 0 | 0 | 0 | 0 | 0 | 0 | 0 | 0 | 3 |
| Cluster2011E Proteobac Alphap Rhod Acetobæ Acidisphaera      | 0 | 0 | 1 | 1 | 1 | 0 | 0 | 0 | 0 | 0 | 0 | 0 | 3 |
| Cluster20177 Actinobac Actinol Acidi Acidimii Aciditerrimonæ | 0 | 0 | 1 | 0 | 0 | 1 | 1 | 0 | 0 | 0 | 0 | 0 | 3 |
| Cluster20361 Proteobac Gammaproteobacteria                   | 0 | 1 | 0 | 0 | 0 | 2 | 0 | 0 | 0 | 0 | 0 | 0 | 3 |
| Cluster2036E Proteobac Alphap Rhod Acetobæ Acidisphaera      | 1 | 0 | 1 | 1 | 0 | 0 | 0 | 0 | 0 | 0 | 0 | 0 | 3 |
| Cluster20374 Acidobact Acidobacteria_Gp1 Acidobacteriur      | 0 | 0 | 1 | 1 | 0 | 0 | 0 | 0 | 0 | 1 | 0 | 0 | 3 |
| Cluster20382 Proteobac Betapr Burkl Oxalobacteraceae         | 0 | 0 | 0 | 0 | 1 | 1 | 1 | 0 | 0 | 0 | 0 | 0 | 3 |
| Cluster2044C Bacteroid Sphing Sphir Chitinophagaceae         | 0 | 0 | 0 | 0 | 2 | 1 | 0 | 0 | 0 | 0 | 0 | 0 | 3 |
| Cluster20445 Acidobact Acidobacteria_Gp1                     | 0 | 0 | 2 | 1 | 0 | 0 | 0 | 0 | 0 | 0 | 0 | 0 | 3 |
| Cluster20493 Acidobact Acidobacteria_Gp3 Gp3                 | 2 | 0 | 0 | 0 | 0 | 0 | 1 | 0 | 0 | 0 | 0 | 0 | 3 |

|                                                                          |   |   |   |   |   |   |   |   |   |   |   |   |
|--------------------------------------------------------------------------|---|---|---|---|---|---|---|---|---|---|---|---|
| Cluster20538 Proteobac Alphaproteobacteria Rhizomicrobiu                 | 0 | 0 | 0 | 1 | 1 | 0 | 1 | 0 | 0 | 0 | 0 | 3 |
| Cluster20580 Proteobac Betaproteobacteria                                | 1 | 0 | 0 | 1 | 1 | 0 | 0 | 0 | 0 | 0 | 0 | 3 |
| Cluster20644 Acidobact Acidobacteria_Gp6 Gp6                             | 0 | 0 | 0 | 1 | 1 | 0 | 0 | 0 | 0 | 1 | 0 | 3 |
| Cluster20723 Proteobac Gammaproteobacteria Sinobac Steroidobacter        | 1 | 0 | 0 | 0 | 1 | 1 | 0 | 0 | 0 | 0 | 0 | 3 |
| Cluster20820 Proteobac Alphaproteobacteria                               | 0 | 2 | 0 | 0 | 1 | 0 | 0 | 0 | 0 | 0 | 0 | 3 |
| Cluster20821 Actinobac Actinobacteria Acidimicrobiales                   | 0 | 0 | 0 | 0 | 0 | 0 | 2 | 0 | 0 | 0 | 1 | 3 |
| Cluster20827 Acidobact Acidobacteria_Gp3 Gp3                             | 0 | 0 | 1 | 0 | 1 | 0 | 0 | 0 | 0 | 1 | 0 | 3 |
| Cluster20835 Acidobact Acidobacteria_Gp1                                 | 0 | 0 | 0 | 1 | 0 | 1 | 0 | 1 | 0 | 0 | 0 | 3 |
| Cluster20839 Verrucom Omituta Omituta Omituta                            | 1 | 1 | 0 | 0 | 0 | 0 | 1 | 0 | 0 | 0 | 0 | 3 |
| Cluster21044 Proteobac Alphaproteobacteria Caulobacteraceae              | 1 | 0 | 0 | 1 | 0 | 0 | 0 | 0 | 1 | 0 | 0 | 3 |
| Cluster21073 Actinobac Actinobacteria                                    | 1 | 0 | 0 | 0 | 2 | 0 | 0 | 0 | 0 | 0 | 0 | 3 |
| Cluster21087;size=13                                                     | 0 | 0 | 0 | 0 | 0 | 0 | 3 | 0 | 0 | 0 | 0 | 3 |
| Cluster21265 Acidobact Acidobacteria_Gp2 Gp2                             | 0 | 0 | 0 | 1 | 0 | 0 | 1 | 0 | 0 | 1 | 0 | 3 |
| Cluster21423 Chlamydia Chlamydia Parachlamydiaceae                       | 1 | 0 | 0 | 0 | 0 | 1 | 1 | 0 | 0 | 0 | 0 | 3 |
| Cluster21629 Actinobac Actinobacteria Acidimicrobiales                   | 0 | 2 | 0 | 0 | 0 | 0 | 0 | 0 | 1 | 0 | 0 | 3 |
| Cluster21751 Proteobac Gammaproteobacteria                               | 0 | 0 | 1 | 1 | 1 | 0 | 0 | 0 | 0 | 0 | 0 | 3 |
| Cluster21762 Proteobac Alphaproteobacteria Xanthomonadaceae Pseudolabrys | 1 | 0 | 1 | 1 | 0 | 0 | 0 | 0 | 0 | 0 | 0 | 3 |
| Cluster21766 Verrucom Omituta Omituta Omituta                            | 0 | 0 | 0 | 1 | 0 | 0 | 0 | 0 | 2 | 0 | 0 | 3 |
| Cluster21830 Actinobac Actinobacteria Actinomycetales                    | 0 | 0 | 0 | 0 | 0 | 0 | 0 | 0 | 2 | 1 | 0 | 3 |
| Cluster21831 Acidobact Acidobacteria_Gp1 Gp1                             | 0 | 0 | 0 | 1 | 0 | 0 | 0 | 0 | 0 | 2 | 0 | 3 |
| Cluster22053 Acidobact Acidobacteria_Gp6 Gp6                             | 0 | 0 | 0 | 0 | 0 | 1 | 0 | 1 | 0 | 1 | 0 | 3 |
| Cluster22091 Proteobac Alphaproteobacteria                               | 0 | 0 | 1 | 2 | 0 | 0 | 0 | 0 | 0 | 0 | 0 | 3 |
| Cluster22317 Acidobact Acidobacteria_Gp1                                 | 0 | 1 | 0 | 0 | 0 | 0 | 0 | 1 | 1 | 0 | 0 | 3 |
| Cluster22335;size=13                                                     | 0 | 2 | 0 | 0 | 0 | 0 | 0 | 0 | 0 | 0 | 1 | 3 |
| Cluster22351;size=4                                                      | 0 | 0 | 1 | 0 | 0 | 0 | 1 | 0 | 0 | 0 | 1 | 3 |
| Cluster22386 Proteobac Gammaproteobacteria Sinobac Steroidobacter        | 1 | 0 | 1 | 1 | 0 | 0 | 0 | 0 | 0 | 0 | 0 | 3 |
| Cluster22644 Actinobac Actinobacteria Solirubacter Conexibacter          | 1 | 0 | 1 | 0 | 0 | 0 | 1 | 0 | 0 | 0 | 0 | 3 |
| Cluster22654 Proteobac Gammaproteobacteria                               | 2 | 0 | 0 | 0 | 0 | 0 | 0 | 0 | 0 | 1 | 0 | 3 |
| Cluster22656 Proteobac Alphaproteobacteria Rhodospirillaceae             | 1 | 0 | 0 | 0 | 2 | 0 | 0 | 0 | 0 | 0 | 0 | 3 |

|              |           |                     |                     |                         |             |   |   |   |   |   |   |   |   |   |   |   |   |   |
|--------------|-----------|---------------------|---------------------|-------------------------|-------------|---|---|---|---|---|---|---|---|---|---|---|---|---|
| Cluster22725 | Proteobac | Alphap              | Rhod                | Acetobacteraceae        | 0           | 0 | 0 | 1 | 2 | 0 | 0 | 0 | 0 | 0 | 0 | 0 | 0 | 3 |
| Cluster22793 | Proteobac | Alphap              | Rhod                | Acetobacteraceae        | 0           | 0 | 0 | 0 | 1 | 0 | 0 | 0 | 0 | 2 | 0 | 0 | 0 | 3 |
| Cluster22928 | Acidobact | Acidobacteria       | Gp13                | Gp13                    | 1           | 0 | 0 | 0 | 0 | 1 | 0 | 0 | 1 | 0 | 0 | 0 | 0 | 3 |
| Cluster22979 | Actinobac | Actinol             | Actinomycetales     |                         | 0           | 0 | 2 | 0 | 0 | 0 | 0 | 0 | 0 | 0 | 1 | 0 | 0 | 3 |
| Cluster22985 | Proteobac | Alphaproteobacteria |                     |                         | 0           | 0 | 1 | 0 | 0 | 2 | 0 | 0 | 0 | 0 | 0 | 0 | 0 | 3 |
| Cluster23215 | Proteobac | Alphap              | Caulc               | Caulobacteraceae        | 0           | 0 | 0 | 0 | 0 | 0 | 0 | 0 | 1 | 0 | 2 | 0 | 0 | 3 |
| Cluster23308 | Acidobact | Acidobacteria       | Gp3                 | Gp3                     | 0           | 0 | 0 | 0 | 1 | 2 | 0 | 0 | 0 | 0 | 0 | 0 | 0 | 3 |
| Cluster23380 | Bacteroid | Sphing              | Sphir               | Sphingo Mucilaginibact  | 1           | 0 | 0 | 0 | 1 | 0 | 0 | 0 | 0 | 1 | 0 | 0 | 0 | 3 |
| Cluster23426 | Proteobac | Gamm                | Pseu                | Pseudo                  | Pseudomonas | 0 | 0 | 0 | 0 | 0 | 3 | 0 | 0 | 0 | 0 | 0 | 0 | 3 |
| Cluster23428 | Proteobac | Gamm                | Xant                | Sinobac Nevskia         | 0           | 0 | 0 | 0 | 0 | 1 | 2 | 0 | 0 | 0 | 0 | 0 | 0 | 3 |
| Cluster23968 | Actinobac | Actinol             | Solirubrobacterales |                         | 0           | 0 | 0 | 0 | 0 | 0 | 0 | 1 | 1 | 1 | 0 | 0 | 0 | 3 |
| Cluster24089 | Actinobac | Actinol             | Actin               | Mycoba Mycobacteriur    | 0           | 0 | 0 | 0 | 2 | 0 | 0 | 0 | 0 | 0 | 1 | 0 | 0 | 3 |
| Cluster24097 | Bacteroid | Sphing              | Sphir               | Sphingo Mucilaginibact  | 0           | 0 | 0 | 0 | 0 | 0 | 0 | 3 | 0 | 0 | 0 | 0 | 0 | 3 |
| Cluster24178 | Proteobac | Gamm                | aproteobacteria     |                         | 0           | 0 | 0 | 0 | 1 | 0 | 0 | 0 | 0 | 2 | 0 | 0 | 0 | 3 |
| Cluster24215 | Acidobact | Acidobacteria       | Gp1                 |                         | 0           | 0 | 0 | 0 | 2 | 0 | 0 | 0 | 0 | 1 | 0 | 0 | 0 | 3 |
| Cluster24406 | Bacteroid | Sphing              | Sphir               | Sphingo Mucilaginibact  | 2           | 0 | 0 | 0 | 0 | 0 | 0 | 1 | 0 | 0 | 0 | 0 | 0 | 3 |
| Cluster24573 | Proteobac | Alphap              | Rhizobiales         |                         | 0           | 0 | 1 | 0 | 2 | 0 | 0 | 0 | 0 | 0 | 0 | 0 | 0 | 3 |
| Cluster24599 | Proteobac | Gamm                | Pseu                | Pseudo                  | Pseudomonas | 0 | 0 | 1 | 0 | 0 | 0 | 0 | 1 | 0 | 0 | 1 | 0 | 3 |
| Cluster24678 | size=5    |                     |                     |                         | 1           | 0 | 0 | 0 | 0 | 0 | 1 | 1 | 0 | 0 | 0 | 0 | 0 | 3 |
| Cluster24754 | Proteobac | Alphap              | Rhizobiales         |                         | 0           | 0 | 1 | 1 | 1 | 0 | 0 | 0 | 0 | 0 | 0 | 0 | 0 | 3 |
| Cluster24817 | Proteobac | Gamm                | Pseu                | Pseudo                  | Pseudomonas | 0 | 0 | 1 | 0 | 1 | 0 | 1 | 0 | 0 | 0 | 0 | 0 | 3 |
| Cluster25023 | Actinobac | Actinobacteria      |                     |                         | 0           | 0 | 2 | 0 | 0 | 0 | 0 | 0 | 0 | 1 | 0 | 0 | 0 | 3 |
| Cluster25050 | Bacteroid | Sphing              | Sphir               | Chitinophagaceae        | 0           | 0 | 1 | 0 | 0 | 0 | 1 | 0 | 0 | 1 | 0 | 0 | 0 | 3 |
| Cluster25053 | Actinobac | Actinol             | Acidi               | Acidimii Aciditerrimona | 0           | 0 | 0 | 1 | 0 | 0 | 1 | 0 | 0 | 1 | 0 | 0 | 0 | 3 |
| Cluster25118 | Actinobac | Actinol             | Actinomycetales     |                         | 0           | 0 | 0 | 0 | 0 | 1 | 1 | 1 | 0 | 0 | 0 | 0 | 0 | 3 |
| Cluster25229 | Acidobact | Acidobacteria       | Gp3                 | Gp3                     | 0           | 0 | 1 | 0 | 1 | 0 | 0 | 1 | 0 | 0 | 0 | 0 | 0 | 3 |
| Cluster25326 | Proteobac | Alphaproteobacteria |                     |                         | 1           | 0 | 1 | 0 | 1 | 0 | 0 | 0 | 0 | 0 | 0 | 0 | 0 | 3 |
| Cluster25399 | Bacteroid | Sphing              | Sphir               | Sphingobacteriaceae     | 0           | 0 | 2 | 0 | 0 | 0 | 0 | 0 | 0 | 0 | 1 | 0 | 0 | 3 |
| Cluster25420 | Proteobac | Gamm                | Enter               | Enterobacteriaceae      | 1           | 0 | 0 | 1 | 0 | 0 | 0 | 1 | 0 | 0 | 0 | 0 | 0 | 3 |



|                                                              |   |   |   |   |   |   |   |   |   |   |   |   |   |
|--------------------------------------------------------------|---|---|---|---|---|---|---|---|---|---|---|---|---|
| Cluster25471 Actinobac Actinol Acidimicrobiales              | 0 | 0 | 1 | 0 | 0 | 0 | 0 | 1 | 0 | 0 | 1 | 0 | 3 |
| Cluster25694 Actinobac Actinol Actin Catenul Catenulispora   | 0 | 0 | 0 | 0 | 0 | 0 | 0 | 1 | 0 | 0 | 1 | 1 | 3 |
| Cluster25729 Actinobac Actinol Actinomycetales               | 1 | 0 | 0 | 0 | 0 | 0 | 0 | 0 | 1 | 0 | 1 | 0 | 3 |
| Cluster26235 Proteobac Alphaproteobacteria                   | 0 | 0 | 1 | 1 | 0 | 0 | 0 | 0 | 0 | 0 | 1 | 0 | 3 |
| Cluster26334 Proteobac Deltap Bdell Bdellovi Bdellovibrio    | 1 | 0 | 0 | 1 | 0 | 0 | 0 | 0 | 0 | 1 | 0 | 0 | 3 |
| Cluster26710 Bacteroid Sphing Sphir Chitino Sediminibacteri  | 1 | 0 | 1 | 0 | 0 | 0 | 0 | 0 | 0 | 0 | 1 | 0 | 3 |
| Cluster26744 Bacteroid Sphing Sphir Chitino Ferruginibacte   | 2 | 0 | 0 | 0 | 0 | 0 | 1 | 0 | 0 | 0 | 0 | 0 | 3 |
| Cluster26846;size=16                                         | 0 | 0 | 1 | 0 | 0 | 0 | 0 | 1 | 0 | 0 | 1 | 0 | 3 |
| Cluster26913 Acidobacteria                                   | 0 | 1 | 0 | 0 | 0 | 0 | 1 | 0 | 0 | 0 | 0 | 1 | 3 |
| Cluster26945 Bacteroid Sphing Sphir Chitinophagaceae         | 0 | 0 | 1 | 0 | 0 | 0 | 0 | 0 | 0 | 1 | 0 | 1 | 3 |
| Cluster27243 Bacteroid Sphing Sphir Chitinophagaceae         | 0 | 0 | 3 | 0 | 0 | 0 | 0 | 0 | 0 | 0 | 0 | 0 | 3 |
| Cluster27396 Bacteroid Sphing Sphir Chitinophagaceae         | 0 | 0 | 0 | 1 | 0 | 1 | 0 | 1 | 0 | 0 | 0 | 0 | 3 |
| Cluster27402;size=5                                          | 0 | 0 | 0 | 0 | 0 | 0 | 1 | 0 | 0 | 0 | 2 | 0 | 3 |
| Cluster27431 Actinobac Actinol Acidi Acidimii Aciditerrimona | 0 | 0 | 2 | 0 | 0 | 0 | 1 | 0 | 0 | 0 | 0 | 0 | 3 |
| Cluster27747 Bacteroid Sphing Sphir Chitinophagaceae         | 0 | 0 | 0 | 1 | 0 | 1 | 0 | 1 | 0 | 0 | 0 | 0 | 3 |
| Cluster27879 Bacteroid Sphing Sphingobacteriales             | 0 | 0 | 0 | 0 | 0 | 0 | 1 | 0 | 0 | 2 | 0 | 0 | 3 |
| Cluster28109;size=10                                         | 0 | 0 | 0 | 0 | 1 | 0 | 0 | 1 | 0 | 0 | 0 | 1 | 3 |
| Cluster28265 Bacteroid Sphing Sphir Sphingo Mucilaginibact   | 0 | 0 | 0 | 1 | 0 | 1 | 0 | 1 | 0 | 0 | 0 | 0 | 3 |
| Cluster28266 Actinobac Actinol Actinomycetales               | 0 | 0 | 1 | 0 | 0 | 0 | 0 | 0 | 0 | 2 | 0 | 0 | 3 |
| Cluster28826 Actinobac Actinol Acidi Acidimii Aciditerrimona | 0 | 0 | 0 | 0 | 2 | 1 | 0 | 0 | 0 | 0 | 0 | 0 | 3 |
| Cluster29032 Bacteroid Sphing Sphir Sphingo Mucilaginibact   | 0 | 1 | 0 | 0 | 0 | 0 | 0 | 0 | 1 | 0 | 0 | 1 | 3 |
| Cluster29183 Actinobac Actinobacteria                        | 0 | 0 | 0 | 1 | 1 | 0 | 0 | 1 | 0 | 0 | 0 | 0 | 3 |
| Cluster29219 Bacteroidetes                                   | 0 | 0 | 1 | 0 | 0 | 0 | 0 | 2 | 0 | 0 | 0 | 0 | 3 |
| Cluster29259 Actinobac Actinol Actinomycetales               | 0 | 1 | 0 | 0 | 0 | 0 | 1 | 1 | 0 | 0 | 0 | 0 | 3 |
| Cluster29290 Bacteroid Sphing Sphir Sphingo Mucilaginibact   | 1 | 0 | 1 | 0 | 0 | 0 | 0 | 0 | 1 | 0 | 0 | 0 | 3 |
| Cluster29324 Bacteroid Sphing Sphir Sphingo Mucilaginibact   | 0 | 1 | 0 | 1 | 0 | 1 | 0 | 0 | 0 | 0 | 0 | 0 | 3 |
| Cluster29499 Bacteroid Sphing Sphir Sphingo Mucilaginibact   | 0 | 0 | 0 | 0 | 0 | 0 | 0 | 0 | 0 | 1 | 1 | 1 | 3 |
| Cluster17;size Acidobact Acidobacteria_Gp10 Gp10             | 0 | 0 | 0 | 0 | 0 | 0 | 0 | 1 | 0 | 0 | 0 | 1 | 2 |
| Cluster22;size Acidobact Acidobacteria_Gp1                   | 0 | 1 | 0 | 0 | 0 | 0 | 0 | 1 | 0 | 0 | 0 | 0 | 2 |



|                                                           |   |   |   |   |   |   |   |   |   |   |   |   |   |
|-----------------------------------------------------------|---|---|---|---|---|---|---|---|---|---|---|---|---|
| Cluster418;si Acidobact Acidobacteria_Gp3                 | 0 | 0 | 0 | 0 | 0 | 1 | 0 | 0 | 0 | 1 | 0 | 0 | 2 |
| Cluster450;si Acidobact Acidobacteria_Gp3                 | 0 | 1 | 0 | 0 | 0 | 0 | 0 | 0 | 1 | 0 | 0 | 0 | 2 |
| Cluster457;si Verrucom Opitut; Opitu Opituta Opitutus     | 1 | 0 | 0 | 0 | 0 | 0 | 0 | 0 | 0 | 1 | 0 | 0 | 2 |
| Cluster489;si Acidobact Acidobacteria_Gp1                 | 0 | 1 | 1 | 0 | 0 | 0 | 0 | 0 | 0 | 0 | 0 | 0 | 2 |
| Cluster528;si Acidobact Acidobacteria_Gp1 Gp1             | 0 | 0 | 2 | 0 | 0 | 0 | 0 | 0 | 0 | 0 | 0 | 0 | 2 |
| Cluster529;si Proteobac Betaproteobacteria                | 0 | 2 | 0 | 0 | 0 | 0 | 0 | 0 | 0 | 0 | 0 | 0 | 2 |
| Cluster546;si Acidobact Acidobacteria_Gp1 Gp1             | 0 | 1 | 0 | 0 | 1 | 0 | 0 | 0 | 0 | 0 | 0 | 0 | 2 |
| Cluster557;si Proteobac Deltap Myxc Cystoba Anaeromyxoba  | 1 | 0 | 1 | 0 | 0 | 0 | 0 | 0 | 0 | 0 | 0 | 0 | 2 |
| Cluster559;si Acidobact Acidobacteria_Gp3 Gp3             | 0 | 1 | 0 | 0 | 1 | 0 | 0 | 0 | 0 | 0 | 0 | 0 | 2 |
| Cluster572;si Acidobact Acidobacteria_Gp10 Gp10           | 0 | 0 | 0 | 1 | 0 | 0 | 0 | 0 | 1 | 0 | 0 | 0 | 2 |
| Cluster578;si Acidobact Acidobacteria_Gp2 Gp2             | 1 | 0 | 0 | 1 | 0 | 0 | 0 | 0 | 0 | 0 | 0 | 0 | 2 |
| Cluster594;si Proteobac Alphap Alphaproteob Rhizomicrobiu | 0 | 0 | 0 | 1 | 0 | 0 | 1 | 0 | 0 | 0 | 0 | 0 | 2 |
| Cluster595;si Acidobact Acidobacteria_Gp1                 | 0 | 0 | 0 | 0 | 0 | 0 | 0 | 1 | 1 | 0 | 0 | 0 | 2 |
| Cluster602;si Acidobact Acidobacteria_Gp1                 | 1 | 0 | 0 | 0 | 0 | 0 | 0 | 0 | 1 | 0 | 0 | 0 | 2 |
| Cluster603;si Acidobact Acidobacteria_Gp1                 | 1 | 0 | 0 | 1 | 0 | 0 | 0 | 0 | 0 | 0 | 0 | 0 | 2 |
| Cluster604;size=2                                         | 1 | 0 | 0 | 0 | 0 | 1 | 0 | 0 | 0 | 0 | 0 | 0 | 2 |
| Cluster626;si Acidobact Acidobacteria_Gp1                 | 0 | 0 | 0 | 0 | 0 | 0 | 0 | 0 | 0 | 1 | 1 | 0 | 2 |
| Cluster634;si Proteobac Deltaproteobacteria               | 2 | 0 | 0 | 0 | 0 | 0 | 0 | 0 | 0 | 0 | 0 | 0 | 2 |
| Cluster654;si Acidobact Acidobacteria_Gp1 Gp1             | 0 | 0 | 0 | 0 | 0 | 0 | 0 | 0 | 0 | 0 | 2 | 0 | 2 |
| Cluster671;size=7                                         | 0 | 0 | 0 | 0 | 1 | 0 | 0 | 0 | 0 | 1 | 0 | 0 | 2 |
| Cluster672;si Proteobac Alphap Rhizobiales                | 0 | 0 | 0 | 0 | 2 | 0 | 0 | 0 | 0 | 0 | 0 | 0 | 2 |
| Cluster673;si Acidobact Acidobacteria_Gp1 Gp1             | 1 | 0 | 0 | 1 | 0 | 0 | 0 | 0 | 0 | 0 | 0 | 0 | 2 |
| Cluster686;si Proteobac Gamm Legio Coxiella Aquicella     | 0 | 0 | 1 | 0 | 0 | 0 | 0 | 0 | 1 | 0 | 0 | 0 | 2 |
| Cluster687;si Acidobact Acidobacteria_Gp3                 | 1 | 0 | 0 | 0 | 0 | 0 | 0 | 0 | 0 | 0 | 1 | 0 | 2 |
| Cluster692;si Acidobact Acidobacteria_Gp1                 | 0 | 0 | 0 | 0 | 1 | 0 | 0 | 0 | 0 | 0 | 0 | 1 | 2 |
| Cluster715;si Proteobac Alphap Rhod Acetobacteraceae      | 0 | 0 | 0 | 1 | 0 | 0 | 0 | 0 | 0 | 0 | 1 | 0 | 2 |
| Cluster732;si Acidobact Acidobacteria_Gp3 Gp3             | 0 | 0 | 0 | 0 | 0 | 1 | 0 | 0 | 1 | 0 | 0 | 0 | 2 |
| Cluster733;si Acidobact Acidobacteria_Gp1 Terriglobus     | 0 | 0 | 2 | 0 | 0 | 0 | 0 | 0 | 0 | 0 | 0 | 0 | 2 |
| Cluster738;size=21                                        | 0 | 0 | 0 | 0 | 0 | 0 | 2 | 0 | 0 | 0 | 0 | 0 | 2 |







|                                                          |   |   |   |   |   |   |   |   |   |   |   |   |   |
|----------------------------------------------------------|---|---|---|---|---|---|---|---|---|---|---|---|---|
| Cluster1578; Acidobact Acidobacteria_Gp1 Gp1             | 0 | 0 | 0 | 0 | 1 | 1 | 0 | 0 | 0 | 0 | 0 | 0 | 2 |
| Cluster1579; size=9                                      | 0 | 1 | 0 | 0 | 0 | 0 | 0 | 0 | 0 | 0 | 1 | 0 | 2 |
| Cluster1591; Acidobact Acidobacteria_Gp3                 | 0 | 0 | 1 | 0 | 0 | 0 | 0 | 0 | 0 | 0 | 1 | 0 | 2 |
| Cluster1597; size=11                                     | 0 | 0 | 0 | 0 | 1 | 0 | 0 | 1 | 0 | 0 | 0 | 0 | 2 |
| Cluster1603; Proteobac Alphap Rhizc Beijerinckiaceae     | 0 | 0 | 0 | 0 | 0 | 0 | 0 | 0 | 0 | 1 | 1 | 0 | 2 |
| Cluster1604; Acidobact Acidobacteria_Gp3 Gp3             | 0 | 0 | 0 | 0 | 0 | 0 | 1 | 0 | 0 | 0 | 1 | 0 | 2 |
| Cluster1616; Proteobac Alphap Rhizobiales                | 1 | 0 | 0 | 0 | 0 | 1 | 0 | 0 | 0 | 0 | 0 | 0 | 2 |
| Cluster1637; Acidobact Acidobacteria_Gp2 Gp2             | 0 | 0 | 0 | 0 | 2 | 0 | 0 | 0 | 0 | 0 | 0 | 0 | 2 |
| Cluster1641; Bacteroid Sphing Sphir Chitinophagaceae     | 1 | 0 | 0 | 0 | 0 | 0 | 0 | 0 | 0 | 0 | 1 | 0 | 2 |
| Cluster1643; size=7                                      | 1 | 0 | 1 | 0 | 0 | 0 | 0 | 0 | 0 | 0 | 0 | 0 | 2 |
| Cluster1645; Proteobac Alphap Rhod Acetobacteraceae      | 0 | 0 | 0 | 0 | 0 | 1 | 0 | 0 | 0 | 1 | 0 | 0 | 2 |
| Cluster1658; Acidobact Acidobacteria_Gp1 Granulicella    | 0 | 0 | 1 | 0 | 0 | 0 | 0 | 0 | 0 | 0 | 1 | 0 | 2 |
| Cluster1661; Verrucom Subdivision3 Subdivision3_ε        | 0 | 0 | 0 | 1 | 0 | 0 | 1 | 0 | 0 | 0 | 0 | 0 | 2 |
| Cluster1667; Actinobac Actinol Actinomycetales           | 0 | 0 | 0 | 0 | 1 | 1 | 0 | 0 | 0 | 0 | 0 | 0 | 2 |
| Cluster1678; Verrucom Opitut; Opitit Opituta Opitutus    | 0 | 1 | 0 | 0 | 0 | 0 | 0 | 0 | 0 | 0 | 0 | 1 | 2 |
| Cluster1703; Acidobact Acidobacteria_Gp3 Gp3             | 0 | 0 | 0 | 0 | 0 | 0 | 1 | 0 | 0 | 0 | 0 | 1 | 2 |
| Cluster1710; Proteobac Gammaproteobacteria               | 1 | 0 | 0 | 0 | 0 | 0 | 0 | 0 | 0 | 0 | 0 | 1 | 2 |
| Cluster1711; Proteobac Alphap Rhizc Rhizobi; Bauldia     | 0 | 0 | 0 | 0 | 1 | 0 | 0 | 1 | 0 | 0 | 0 | 0 | 2 |
| Cluster1731; Acidobact Acidobacteria_Gp1                 | 0 | 0 | 0 | 0 | 0 | 0 | 0 | 1 | 0 | 0 | 0 | 1 | 2 |
| Cluster1733; Acidobact Acidobacteria_Gp3                 | 0 | 0 | 0 | 0 | 1 | 0 | 0 | 0 | 0 | 0 | 0 | 1 | 2 |
| Cluster1762; Proteobac Gammaproteobacteria               | 0 | 0 | 0 | 0 | 0 | 1 | 0 | 0 | 0 | 1 | 0 | 0 | 2 |
| Cluster1764; Proteobac Gamm Xantl Sinobac Steroidobacter | 0 | 0 | 1 | 0 | 0 | 0 | 0 | 0 | 0 | 0 | 1 | 0 | 2 |
| Cluster1778; Proteobac Gammaproteobacteria               | 0 | 0 | 0 | 0 | 2 | 0 | 0 | 0 | 0 | 0 | 0 | 0 | 2 |
| Cluster1806; Proteobac Alphap Rhod Acetobacteraceae      | 0 | 0 | 2 | 0 | 0 | 0 | 0 | 0 | 0 | 0 | 0 | 0 | 2 |
| Cluster1817; size=4                                      | 0 | 0 | 1 | 1 | 0 | 0 | 0 | 0 | 0 | 0 | 0 | 0 | 2 |
| Cluster1827; Proteobac Deltap Bdeff Bdeff Bdeff Bdeff    | 0 | 1 | 0 | 1 | 0 | 0 | 0 | 0 | 0 | 0 | 0 | 0 | 2 |
| Cluster1835; Proteobac Alphaproteobacteria               | 0 | 0 | 0 | 0 | 0 | 0 | 0 | 0 | 0 | 1 | 1 | 0 | 2 |
| Cluster1836; Proteobac Alphap Caulc Caulobacteraceae     | 2 | 0 | 0 | 0 | 0 | 0 | 0 | 0 | 0 | 0 | 0 | 0 | 2 |
| Cluster1849; Proteobac Gamm Xantl Sinobac Steroidobacter | 0 | 1 | 0 | 0 | 0 | 0 | 0 | 0 | 0 | 1 | 0 | 0 | 2 |





|                                                            |   |   |   |   |   |   |   |   |   |   |   |   |   |
|------------------------------------------------------------|---|---|---|---|---|---|---|---|---|---|---|---|---|
| Cluster2303; Acidobacteria                                 | 1 | 0 | 0 | 0 | 0 | 0 | 0 | 1 | 0 | 0 | 0 | 0 | 2 |
| Cluster2310; Actinobac Actinol Actinomycetales             | 0 | 1 | 0 | 0 | 0 | 1 | 0 | 0 | 0 | 0 | 0 | 0 | 2 |
| Cluster2318; Acidobact Acidobacteria_Gp1 Gp1               | 0 | 0 | 0 | 0 | 0 | 0 | 0 | 0 | 0 | 2 | 0 | 0 | 2 |
| Cluster2343; Acidobacteria                                 | 0 | 0 | 0 | 0 | 0 | 0 | 0 | 0 | 0 | 1 | 1 | 0 | 2 |
| Cluster2354; size=5                                        | 0 | 1 | 0 | 0 | 0 | 0 | 1 | 0 | 0 | 0 | 0 | 0 | 2 |
| Cluster2358; Bacteroid Sphing Sphir Sphingo Mucilaginibact | 1 | 0 | 0 | 0 | 0 | 0 | 0 | 0 | 1 | 0 | 0 | 0 | 2 |
| Cluster2406; Acidobact Acidobacteria_Gp1 Gp1               | 0 | 0 | 0 | 0 | 1 | 1 | 0 | 0 | 0 | 0 | 0 | 0 | 2 |
| Cluster2407; Acidobact Acidobacteria_Gp1 Gp1               | 2 | 0 | 0 | 0 | 0 | 0 | 0 | 0 | 0 | 0 | 0 | 0 | 2 |
| Cluster2417; Planctom Planct Planct Plancto Zavarzinella   | 0 | 1 | 0 | 0 | 0 | 0 | 1 | 0 | 0 | 0 | 0 | 0 | 2 |
| Cluster2423; Acidobact Acidobacteria_Gp1                   | 0 | 0 | 1 | 0 | 0 | 0 | 0 | 0 | 1 | 0 | 0 | 0 | 2 |
| Cluster2434; Proteobac Alphap Rhodospirillales             | 0 | 0 | 1 | 0 | 0 | 0 | 0 | 0 | 0 | 0 | 1 | 0 | 2 |
| Cluster2447; Proteobac Alphap Rhod Acetobacteraceae        | 0 | 1 | 0 | 0 | 0 | 0 | 0 | 0 | 0 | 0 | 0 | 1 | 2 |
| Cluster2466; Acidobact Acidobacteria_Gp2 Gp2               | 2 | 0 | 0 | 0 | 0 | 0 | 0 | 0 | 0 | 0 | 0 | 0 | 2 |
| Cluster2469; Proteobac Gamm Xantl Sinobac Steroidobacter   | 0 | 0 | 0 | 0 | 0 | 1 | 0 | 0 | 0 | 0 | 0 | 1 | 2 |
| Cluster2472; Proteobac Betapr Rhod Rhodocyclaceae          | 0 | 0 | 1 | 0 | 0 | 1 | 0 | 0 | 0 | 0 | 0 | 0 | 2 |
| Cluster2498; Acidobact Acidobacteria_Gp1                   | 1 | 0 | 0 | 0 | 0 | 0 | 1 | 0 | 0 | 0 | 0 | 0 | 2 |
| Cluster2533; size=8                                        | 0 | 0 | 0 | 1 | 0 | 0 | 0 | 0 | 1 | 0 | 0 | 0 | 2 |
| Cluster2537; Bacteroid Sphing Sphir Chitino Ferruginibacte | 0 | 0 | 1 | 0 | 0 | 0 | 0 | 0 | 0 | 1 | 0 | 0 | 2 |
| Cluster2543; Bacteroid Sphing Sphir Chitinophagaceae       | 0 | 0 | 0 | 0 | 0 | 0 | 1 | 0 | 0 | 1 | 0 | 0 | 2 |
| Cluster2594; size=11                                       | 0 | 0 | 0 | 0 | 0 | 0 | 0 | 0 | 1 | 0 | 0 | 1 | 2 |
| Cluster2611; Acidobact Acidobacteria_Gp1 Edaphobacter      | 0 | 0 | 0 | 0 | 0 | 0 | 0 | 0 | 0 | 2 | 0 | 0 | 2 |
| Cluster2623; size=9                                        | 1 | 0 | 0 | 0 | 0 | 0 | 0 | 1 | 0 | 0 | 0 | 0 | 2 |
| Cluster2627; Acidobacteria                                 | 0 | 2 | 0 | 0 | 0 | 0 | 0 | 0 | 0 | 0 | 0 | 0 | 2 |
| Cluster2651; Acidobact Acidobacteria_Gp3 Gp3               | 0 | 0 | 0 | 1 | 0 | 0 | 0 | 0 | 0 | 0 | 1 | 0 | 2 |
| Cluster2673; Proteobac Deltap Myxc Kofleria Kofleria       | 0 | 0 | 0 | 0 | 0 | 0 | 0 | 1 | 1 | 0 | 0 | 0 | 2 |
| Cluster2678; Acidobact Acidobacteria_Gp2 Gp2               | 0 | 0 | 1 | 1 | 0 | 0 | 0 | 0 | 0 | 0 | 0 | 0 | 2 |
| Cluster2707; Planctom Planct Planct Plancto Singulisphaera | 1 | 0 | 0 | 0 | 0 | 0 | 0 | 0 | 1 | 0 | 0 | 0 | 2 |
| Cluster2724; Acidobact Acidobacteria_Gp2 Gp2               | 0 | 0 | 0 | 1 | 0 | 0 | 0 | 0 | 0 | 0 | 1 | 0 | 2 |
| Cluster2743; size=17                                       | 0 | 0 | 0 | 0 | 0 | 1 | 1 | 0 | 0 | 0 | 0 | 0 | 2 |

|                                                            |   |   |   |   |   |   |   |   |   |   |   |   |   |   |
|------------------------------------------------------------|---|---|---|---|---|---|---|---|---|---|---|---|---|---|
| Cluster2751; Acidobact Acidobacteria_Gp1 Edaphobacter      | 1 | 0 | 0 | 0 | 0 | 0 | 0 | 0 | 0 | 0 | 0 | 1 | 0 | 2 |
| Cluster2764; Acidobact Acidobacteria_Gp1 Gp1               | 0 | 0 | 0 | 0 | 0 | 0 | 1 | 1 | 0 | 0 | 0 | 0 | 0 | 2 |
| Cluster2766; size=17                                       | 0 | 1 | 0 | 0 | 0 | 0 | 0 | 0 | 0 | 0 | 0 | 1 | 0 | 2 |
| Cluster2783; Proteobac Betapr Burkl Burkhol Burkholderia   | 0 | 0 | 1 | 0 | 0 | 0 | 1 | 0 | 0 | 0 | 0 | 0 | 0 | 2 |
| Cluster2794; Acidobact Acidobacteria_Gp1 Gp1               | 0 | 0 | 0 | 2 | 0 | 0 | 0 | 0 | 0 | 0 | 0 | 0 | 0 | 2 |
| Cluster2801; Verrucomicrobia                               | 1 | 0 | 0 | 0 | 0 | 1 | 0 | 0 | 0 | 0 | 0 | 0 | 0 | 2 |
| Cluster2837; Proteobac Betapr Burkl Burkholderiales_incert | 0 | 0 | 0 | 0 | 0 | 2 | 0 | 0 | 0 | 0 | 0 | 0 | 0 | 2 |
| Cluster2842; Acidobact Acidobacteria_Gp3 Gp3               | 0 | 0 | 0 | 0 | 0 | 0 | 0 | 0 | 0 | 0 | 0 | 0 | 2 | 2 |
| Cluster2862; Proteobac Alphap Rhizobiales                  | 0 | 0 | 1 | 0 | 1 | 0 | 0 | 0 | 0 | 0 | 0 | 0 | 0 | 2 |
| Cluster2868; Proteobac Gamm Xantl Sinobac Steroidobacter   | 0 | 1 | 1 | 0 | 0 | 0 | 0 | 0 | 0 | 0 | 0 | 0 | 0 | 2 |
| Cluster2870; Acidobact Acidobacteria_Gp1 Gp1               | 0 | 2 | 0 | 0 | 0 | 0 | 0 | 0 | 0 | 0 | 0 | 0 | 0 | 2 |
| Cluster2883; Proteobac Alphap Alphaproteok Rhizomicrobiu   | 1 | 0 | 0 | 0 | 0 | 0 | 0 | 1 | 0 | 0 | 0 | 0 | 0 | 2 |
| Cluster2890; Chloroflex Ktedor Ktedonobacterales           | 0 | 0 | 0 | 0 | 0 | 0 | 1 | 0 | 0 | 0 | 1 | 0 | 0 | 2 |
| Cluster2891; Verrucom Subdivision3 Subdivision3_ξ          | 0 | 0 | 1 | 0 | 0 | 0 | 0 | 0 | 0 | 1 | 0 | 0 | 0 | 2 |
| Cluster2916; size=8                                        | 1 | 0 | 1 | 0 | 0 | 0 | 0 | 0 | 0 | 0 | 0 | 0 | 0 | 2 |
| Cluster2917; Verrucom Subdivision3 Subdivision3_ξ          | 0 | 0 | 0 | 0 | 0 | 1 | 0 | 0 | 0 | 0 | 1 | 0 | 0 | 2 |
| Cluster2929; Acidobact Acidobacteria_Gp3                   | 0 | 0 | 0 | 0 | 1 | 0 | 1 | 0 | 0 | 0 | 0 | 0 | 0 | 2 |
| Cluster2932; Actinobac Actinol Actinomycetales             | 0 | 0 | 0 | 0 | 0 | 1 | 1 | 0 | 0 | 0 | 0 | 0 | 0 | 2 |
| Cluster2999; Proteobac Alphap Rhod Acetobacteraceae        | 0 | 0 | 1 | 0 | 0 | 0 | 0 | 0 | 0 | 0 | 1 | 0 | 0 | 2 |
| Cluster3044; Bacteroid Sphing Sphir Sphingo Mucilaginibact | 0 | 0 | 1 | 1 | 0 | 0 | 0 | 0 | 0 | 0 | 0 | 0 | 0 | 2 |
| Cluster3105; Proteobac Gamm Legio Coxiella Coxiella        | 0 | 0 | 0 | 0 | 0 | 2 | 0 | 0 | 0 | 0 | 0 | 0 | 0 | 2 |
| Cluster3121; Chlamydi; Chlamy Chlamydiales                 | 0 | 0 | 0 | 0 | 0 | 0 | 2 | 0 | 0 | 0 | 0 | 0 | 0 | 2 |
| Cluster3134; Proteobac Alphap Rhizc Xanthol Pseudolabrys   | 0 | 0 | 0 | 0 | 1 | 0 | 1 | 0 | 0 | 0 | 0 | 0 | 0 | 2 |
| Cluster3145; Gemmatir Gemm Geml Gemma Gemmatimonas         | 0 | 1 | 0 | 0 | 0 | 0 | 0 | 0 | 0 | 0 | 0 | 1 | 0 | 2 |
| Cluster3153; Proteobac Gammaproteobacteria                 | 0 | 0 | 0 | 1 | 0 | 1 | 0 | 0 | 0 | 0 | 0 | 0 | 0 | 2 |
| Cluster3156; Actinobac Actinol Actin Thermomonosporacea    | 0 | 0 | 1 | 0 | 1 | 0 | 0 | 0 | 0 | 0 | 0 | 0 | 0 | 2 |
| Cluster3181; Proteobac Alphap Caulc Cauloba Phenyllobacter | 0 | 0 | 0 | 1 | 0 | 0 | 0 | 0 | 1 | 0 | 0 | 0 | 0 | 2 |
| Cluster3183; Acidobacteria                                 | 0 | 1 | 0 | 0 | 0 | 0 | 0 | 1 | 0 | 0 | 0 | 0 | 0 | 2 |
| Cluster3184; Acidobact Acidobacteria_Gp2 Gp2               | 0 | 0 | 0 | 1 | 0 | 0 | 0 | 0 | 0 | 0 | 0 | 1 | 0 | 2 |

|                                                            |   |   |   |   |   |   |   |   |   |   |   |   |   |
|------------------------------------------------------------|---|---|---|---|---|---|---|---|---|---|---|---|---|
| Cluster3188; Proteobac Alphap Rhodospirillales             | 0 | 1 | 0 | 0 | 0 | 0 | 0 | 0 | 0 | 0 | 0 | 1 | 2 |
| Cluster3215; Acidobact Acidobacteria_Gp2 Gp2               | 0 | 0 | 0 | 0 | 0 | 0 | 1 | 1 | 0 | 0 | 0 | 0 | 2 |
| Cluster3220; Acidobact Acidobacteria_Gp2 Gp2               | 0 | 0 | 0 | 0 | 0 | 0 | 0 | 0 | 0 | 0 | 0 | 2 | 2 |
| Cluster3244; Acidobact Acidobacteria_Gp2 Gp2               | 0 | 0 | 0 | 0 | 1 | 0 | 1 | 0 | 0 | 0 | 0 | 0 | 2 |
| Cluster3260; Acidobact Acidobacteria_Gp2 Gp2               | 0 | 0 | 1 | 0 | 1 | 0 | 0 | 0 | 0 | 0 | 0 | 0 | 2 |
| Cluster3271;size=8                                         | 0 | 0 | 2 | 0 | 0 | 0 | 0 | 0 | 0 | 0 | 0 | 0 | 2 |
| Cluster3292; Proteobac Alphap Rhizobiales                  | 2 | 0 | 0 | 0 | 0 | 0 | 0 | 0 | 0 | 0 | 0 | 0 | 2 |
| Cluster3312; Verrucom Subdivision3 Subdivision3_ξ          | 0 | 0 | 0 | 0 | 1 | 0 | 0 | 0 | 0 | 0 | 0 | 1 | 2 |
| Cluster3314; Planctom Planct Planc Plancto Singulisphaera  | 0 | 0 | 0 | 0 | 0 | 0 | 0 | 2 | 0 | 0 | 0 | 0 | 2 |
| Cluster3330; Planctom Planct Planc Plancto Singulisphaera  | 0 | 0 | 0 | 0 | 0 | 0 | 0 | 1 | 1 | 0 | 0 | 0 | 2 |
| Cluster3344; Proteobac Gamm Xantl Sinobac Steroidobacter   | 0 | 0 | 0 | 0 | 0 | 0 | 0 | 0 | 0 | 1 | 1 | 0 | 2 |
| Cluster3348; Planctom Planct Planc Plancto Singulisphaera  | 0 | 0 | 0 | 0 | 0 | 0 | 0 | 0 | 0 | 1 | 1 | 0 | 2 |
| Cluster3375; Verrucom Opitutae                             | 1 | 0 | 0 | 0 | 1 | 0 | 0 | 0 | 0 | 0 | 0 | 0 | 2 |
| Cluster3382; Bacteroid Sphing Sphir Chitinophagaceae       | 0 | 1 | 0 | 0 | 1 | 0 | 0 | 0 | 0 | 0 | 0 | 0 | 2 |
| Cluster3394; Proteobac Alphap Caulc Caulobæ Caulobacter    | 0 | 0 | 1 | 0 | 0 | 0 | 0 | 0 | 0 | 1 | 0 | 0 | 2 |
| Cluster3401;size=2                                         | 0 | 0 | 0 | 0 | 0 | 1 | 0 | 0 | 0 | 0 | 1 | 0 | 2 |
| Cluster3409; Acidobact Acidobacteria_Gp3                   | 0 | 0 | 0 | 0 | 0 | 0 | 0 | 0 | 1 | 0 | 0 | 1 | 2 |
| Cluster3414; Verrucom Spartobacteria Spartobacteria        | 0 | 0 | 0 | 0 | 0 | 0 | 1 | 0 | 1 | 0 | 0 | 0 | 2 |
| Cluster3442; Planctomycetes                                | 0 | 1 | 1 | 0 | 0 | 0 | 0 | 0 | 0 | 0 | 0 | 0 | 2 |
| Cluster3444; Proteobac Betapr Burkl Burkhol Burkholderia   | 0 | 1 | 0 | 0 | 0 | 0 | 0 | 1 | 0 | 0 | 0 | 0 | 2 |
| Cluster3461;size=14                                        | 0 | 0 | 0 | 0 | 0 | 1 | 0 | 1 | 0 | 0 | 0 | 0 | 2 |
| Cluster3511; Acidobacteria                                 | 0 | 0 | 0 | 0 | 0 | 0 | 0 | 0 | 1 | 0 | 0 | 1 | 2 |
| Cluster3531; Acidobact Acidobacteria_Gp2 Gp2               | 2 | 0 | 0 | 0 | 0 | 0 | 0 | 0 | 0 | 0 | 0 | 0 | 2 |
| Cluster3590; Actinobac Actino Acidimicrobiales             | 0 | 0 | 0 | 0 | 1 | 0 | 0 | 0 | 0 | 1 | 0 | 0 | 2 |
| Cluster3592; Proteobac Deltap Bdelel Bdelel Vampirovibrio  | 0 | 0 | 1 | 1 | 0 | 0 | 0 | 0 | 0 | 0 | 0 | 0 | 2 |
| Cluster3620; Proteobac Alphap Rhizc Beijerin Chelatococcus | 0 | 0 | 0 | 1 | 0 | 0 | 0 | 0 | 1 | 0 | 0 | 0 | 2 |
| Cluster3655;size=5                                         | 0 | 0 | 0 | 1 | 0 | 0 | 1 | 0 | 0 | 0 | 0 | 0 | 2 |
| Cluster3661; Proteobac Gammaproteobacteria                 | 0 | 0 | 0 | 0 | 2 | 0 | 0 | 0 | 0 | 0 | 0 | 0 | 2 |
| Cluster3666; Proteobac Alphap Caulc Caulobacteraceae       | 0 | 0 | 1 | 0 | 0 | 0 | 0 | 0 | 0 | 0 | 1 | 0 | 2 |









|                                                               |   |   |   |   |   |   |   |   |   |   |   |   |   |
|---------------------------------------------------------------|---|---|---|---|---|---|---|---|---|---|---|---|---|
| Cluster6436; Acidobact Acidobacteria_Gp6 Gp6                  | 0 | 0 | 0 | 0 | 0 | 0 | 0 | 1 | 0 | 0 | 1 | 0 | 2 |
| Cluster6513; Proteobac Deltaproteobacteria                    | 0 | 1 | 0 | 0 | 0 | 0 | 0 | 0 | 1 | 0 | 0 | 0 | 2 |
| Cluster6528; size=10                                          | 0 | 0 | 0 | 0 | 0 | 0 | 0 | 1 | 0 | 0 | 1 | 0 | 2 |
| Cluster6547; Proteobac Alphap Rhod Rhodospirillaceae          | 0 | 0 | 0 | 1 | 1 | 0 | 0 | 0 | 0 | 0 | 0 | 0 | 2 |
| Cluster6563; size=5                                           | 1 | 1 | 0 | 0 | 0 | 0 | 0 | 0 | 0 | 0 | 0 | 0 | 2 |
| Cluster6609; Acidobact Acidobacteria_Gp1 Terriglobus          | 0 | 0 | 1 | 1 | 0 | 0 | 0 | 0 | 0 | 0 | 0 | 0 | 2 |
| Cluster6636; Acidobact Acidobacteria_Gp2 Gp2                  | 1 | 0 | 0 | 0 | 1 | 0 | 0 | 0 | 0 | 0 | 0 | 0 | 2 |
| Cluster6667; Elusimicrc Elusim Elusir Elusimic Elusimicrobiun | 0 | 0 | 0 | 0 | 0 | 0 | 0 | 0 | 0 | 1 | 1 | 0 | 2 |
| Cluster6670; size=6                                           | 0 | 0 | 0 | 0 | 0 | 0 | 0 | 2 | 0 | 0 | 0 | 0 | 2 |
| Cluster6717; Chloroflex Ktedor Ktedonobacterales              | 0 | 0 | 0 | 0 | 0 | 0 | 0 | 2 | 0 | 0 | 0 | 0 | 2 |
| Cluster6776; Acidobact Acidobacteria_Gp1 Gp1                  | 0 | 0 | 0 | 0 | 0 | 0 | 0 | 1 | 0 | 0 | 0 | 1 | 2 |
| Cluster6778; Verrucom Subdivision3 Subdivision3_ξ             | 0 | 1 | 0 | 0 | 0 | 0 | 1 | 0 | 0 | 0 | 0 | 0 | 2 |
| Cluster6780; Proteobac Alphap Rhodospirillales                | 0 | 0 | 0 | 1 | 1 | 0 | 0 | 0 | 0 | 0 | 0 | 0 | 2 |
| Cluster6785; Actinobac Actinol Actinomycetales                | 0 | 0 | 0 | 0 | 0 | 1 | 0 | 0 | 0 | 0 | 1 | 0 | 2 |
| Cluster6786; Proteobac Deltap Bdelel Bdelelovi Bdelelovibrio  | 0 | 0 | 0 | 0 | 0 | 1 | 1 | 0 | 0 | 0 | 0 | 0 | 2 |
| Cluster6805; Acidobact Acidobacteria_Gp3 Bryobacter           | 0 | 0 | 1 | 0 | 1 | 0 | 0 | 0 | 0 | 0 | 0 | 0 | 2 |
| Cluster6837; Proteobac Gamm Xantl Sinobac Steroidobacter      | 1 | 0 | 1 | 0 | 0 | 0 | 0 | 0 | 0 | 0 | 0 | 0 | 2 |
| Cluster6842; Proteobac Alphap Rhodospirillales                | 0 | 0 | 0 | 0 | 0 | 0 | 0 | 0 | 0 | 0 | 2 | 0 | 2 |
| Cluster6858; Proteobac Alphaproteobacteria                    | 0 | 0 | 0 | 0 | 2 | 0 | 0 | 0 | 0 | 0 | 0 | 0 | 2 |
| Cluster6908; Proteobac Deltap Bdelel Bdelelovi Bdelelovibrio  | 1 | 0 | 0 | 0 | 0 | 1 | 0 | 0 | 0 | 0 | 0 | 0 | 2 |
| Cluster6922; Proteobac Alphap Rhizobiales                     | 0 | 0 | 0 | 0 | 1 | 1 | 0 | 0 | 0 | 0 | 0 | 0 | 2 |
| Cluster6923; Acidobact Acidobacteria_Gp1                      | 0 | 0 | 0 | 1 | 0 | 0 | 1 | 0 | 0 | 0 | 0 | 0 | 2 |
| Cluster6959; Acidobact Acidobacteria_Gp1 Gp1                  | 0 | 0 | 0 | 0 | 0 | 0 | 0 | 0 | 0 | 1 | 1 | 0 | 2 |
| Cluster6979; Acidobact Acidobacteria_Gp3 Gp3                  | 0 | 0 | 0 | 0 | 0 | 0 | 1 | 0 | 1 | 0 | 0 | 0 | 2 |
| Cluster6998; Proteobac Alphap Rhodospirillales                | 1 | 0 | 0 | 0 | 0 | 0 | 0 | 0 | 0 | 0 | 0 | 1 | 2 |
| Cluster7003; Acidobact Acidobacteria_Gp1                      | 0 | 0 | 1 | 0 | 0 | 0 | 0 | 0 | 0 | 0 | 1 | 0 | 2 |
| Cluster7048; Proteobac Alphap Rhod Rhodospirillaceae          | 0 | 0 | 0 | 0 | 0 | 0 | 0 | 0 | 0 | 1 | 1 | 0 | 2 |
| Cluster7059; Acidobact Acidobacteria_Gp3 Gp3                  | 0 | 1 | 0 | 0 | 0 | 0 | 1 | 0 | 0 | 0 | 0 | 0 | 2 |
| Cluster7065; size=12                                          | 0 | 0 | 0 | 0 | 0 | 1 | 1 | 0 | 0 | 0 | 0 | 0 | 2 |











|              |                 |                     |                     |   |   |   |   |   |   |   |   |   |   |   |
|--------------|-----------------|---------------------|---------------------|---|---|---|---|---|---|---|---|---|---|---|
| Cluster10149 | Actinobac       | Actinol             | Actinomycetales     | 0 | 0 | 0 | 1 | 1 | 0 | 0 | 0 | 0 | 0 | 2 |
| Cluster10155 | Verrucom        | Opitut              | Opituta             | 0 | 0 | 0 | 2 | 0 | 0 | 0 | 0 | 0 | 0 | 2 |
| Cluster10184 | Actinobac       | Actinol             | Solirubrobacterales | 0 | 1 | 0 | 0 | 0 | 0 | 0 | 0 | 1 | 0 | 2 |
| Cluster10193 | Proteobac       | Alphap              | Caulc               | 0 | 0 | 0 | 1 | 0 | 0 | 1 | 0 | 0 | 0 | 2 |
| Cluster10194 | Acidobact       | Acidobacteria_Gp1   | Gp1                 | 2 | 0 | 0 | 0 | 0 | 0 | 0 | 0 | 0 | 0 | 2 |
| Cluster10195 | Proteobac       | Alphaproteobacteria |                     | 0 | 0 | 0 | 1 | 0 | 0 | 1 | 0 | 0 | 0 | 2 |
| Cluster10220 | Proteobac       | Alphap              | Rhizobiales         | 0 | 0 | 1 | 0 | 0 | 0 | 0 | 0 | 0 | 1 | 2 |
| Cluster10246 | Proteobac       | Alphap              | Rhizc               | 0 | 1 | 0 | 0 | 0 | 0 | 0 | 1 | 0 | 0 | 2 |
| Cluster10288 | Proteobac       | Alphap              | Rhodospirillales    | 1 | 0 | 0 | 0 | 0 | 0 | 0 | 0 | 0 | 1 | 2 |
| Cluster10327 | Acidobact       | Acidobacteria_Gp3   |                     | 0 | 0 | 0 | 0 | 0 | 0 | 1 | 1 | 0 | 0 | 2 |
| Cluster10353 | size=3          |                     |                     | 0 | 0 | 0 | 0 | 0 | 0 | 1 | 0 | 0 | 1 | 2 |
| Cluster10376 | Proteobac       | Deltaproteobacteria |                     | 0 | 0 | 1 | 0 | 0 | 0 | 1 | 0 | 0 | 0 | 2 |
| Cluster10378 | Acidobact       | Acidobacteria_Gp1   | Acidobacteriur      | 0 | 0 | 0 | 0 | 0 | 0 | 1 | 0 | 0 | 1 | 2 |
| Cluster10382 | Proteobac       | Deltaproteobacteria |                     | 1 | 0 | 0 | 0 | 0 | 0 | 0 | 1 | 0 | 0 | 2 |
| Cluster10465 | Proteobac       | Alphap              | Rhizobiales         | 0 | 0 | 0 | 0 | 0 | 0 | 1 | 0 | 0 | 0 | 2 |
| Cluster10480 | Acidobact       | Acidobacteria_Gp3   |                     | 0 | 0 | 0 | 1 | 0 | 0 | 0 | 1 | 0 | 0 | 2 |
| Cluster10505 | Acidobact       | Acidobacteria_Gp1   |                     | 1 | 0 | 0 | 0 | 0 | 0 | 0 | 0 | 1 | 0 | 2 |
| Cluster10593 | size=4          |                     |                     | 0 | 0 | 1 | 0 | 1 | 0 | 0 | 0 | 0 | 0 | 2 |
| Cluster10596 | Proteobac       | Alphap              | Rhizc               | 0 | 0 | 0 | 0 | 0 | 0 | 1 | 1 | 0 | 0 | 2 |
| Cluster10621 | Proteobac       | Alphap              | Rhizobiales         | 0 | 0 | 0 | 0 | 0 | 0 | 0 | 0 | 0 | 0 | 2 |
| Cluster10646 | Proteobac       | Alphap              | Rhizobiales         | 0 | 0 | 0 | 0 | 1 | 0 | 0 | 0 | 0 | 1 | 2 |
| Cluster10652 | Acidobacteria   |                     |                     | 1 | 0 | 0 | 0 | 0 | 0 | 0 | 1 | 0 | 0 | 2 |
| Cluster10653 | size=3          |                     |                     | 0 | 0 | 0 | 1 | 0 | 0 | 0 | 0 | 0 | 1 | 2 |
| Cluster10695 | size=9          |                     |                     | 0 | 0 | 1 | 0 | 0 | 0 | 0 | 1 | 0 | 0 | 2 |
| Cluster10703 | size=11         |                     |                     | 0 | 0 | 0 | 0 | 0 | 0 | 1 | 1 | 0 | 0 | 2 |
| Cluster10731 | Acidobact       | Acidobacteria_Gp1   |                     | 0 | 0 | 1 | 0 | 0 | 0 | 0 | 0 | 0 | 1 | 2 |
| Cluster10749 | Bacteroidetes   |                     |                     | 0 | 0 | 0 | 2 | 0 | 0 | 0 | 0 | 0 | 0 | 2 |
| Cluster10758 | Acidobacteria   |                     |                     | 1 | 0 | 1 | 0 | 0 | 0 | 0 | 0 | 0 | 0 | 2 |
| Cluster10793 | Armatimonadetes |                     | Armatimonade        | 0 | 0 | 1 | 1 | 0 | 0 | 0 | 0 | 0 | 0 | 2 |

|                                                          |   |   |   |   |   |   |   |   |   |   |   |   |   |
|----------------------------------------------------------|---|---|---|---|---|---|---|---|---|---|---|---|---|
| Cluster10936 Proteobac Alphap Rhizobiales                | 0 | 0 | 0 | 1 | 0 | 0 | 1 | 0 | 0 | 0 | 0 | 0 | 2 |
| Cluster11018 Acidobact Acidobacteria_Gp2 Gp2             | 0 | 0 | 0 | 0 | 1 | 0 | 1 | 0 | 0 | 0 | 0 | 0 | 2 |
| Cluster11030;size=11                                     | 0 | 1 | 0 | 0 | 0 | 1 | 0 | 0 | 0 | 0 | 0 | 0 | 2 |
| Cluster11032 Proteobac Alphap Caulc Cauloba Phenylbacter | 0 | 0 | 0 | 0 | 1 | 0 | 1 | 0 | 0 | 0 | 0 | 0 | 2 |
| Cluster11088 Proteobac Deltap Myxc Cystobacteraceae      | 0 | 0 | 0 | 1 | 0 | 0 | 0 | 0 | 1 | 0 | 0 | 0 | 2 |
| Cluster11113 Acidobact Acidobacteria_Gp2 Gp2             | 0 | 0 | 0 | 0 | 1 | 0 | 0 | 0 | 0 | 0 | 0 | 1 | 2 |
| Cluster11114 Proteobacteria                              | 1 | 0 | 0 | 0 | 0 | 0 | 0 | 0 | 0 | 0 | 0 | 1 | 2 |
| Cluster11127 Proteobacteria                              | 1 | 0 | 0 | 0 | 0 | 0 | 1 | 0 | 0 | 0 | 0 | 0 | 2 |
| Cluster11242 Acidobact Acidobacteria_Gp1 Acidobacteriur  | 0 | 0 | 0 | 0 | 0 | 0 | 1 | 0 | 0 | 1 | 0 | 0 | 2 |
| Cluster11272 Proteobac Alphap Rhizc Phyllob: Aminobacter | 0 | 0 | 0 | 0 | 0 | 1 | 0 | 1 | 0 | 0 | 0 | 0 | 2 |
| Cluster11288 Proteobac Deltap Myxococcales               | 0 | 0 | 0 | 0 | 0 | 1 | 0 | 1 | 0 | 0 | 0 | 0 | 2 |
| Cluster11318 Proteobac Betapr Burkholderiales            | 0 | 0 | 0 | 0 | 2 | 0 | 0 | 0 | 0 | 0 | 0 | 0 | 2 |
| Cluster11334 Acidobact Acidobacteria_Gp1 Gp1             | 0 | 0 | 1 | 0 | 0 | 0 | 0 | 1 | 0 | 0 | 0 | 0 | 2 |
| Cluster11356 Acidobact Acidobacteria_Gp1                 | 0 | 0 | 1 | 0 | 0 | 0 | 0 | 0 | 0 | 1 | 0 | 0 | 2 |
| Cluster11364 Actinobac Actinol Actinomycetales           | 0 | 0 | 0 | 0 | 0 | 0 | 1 | 1 | 0 | 0 | 0 | 0 | 2 |
| Cluster11406 Proteobacteria                              | 0 | 0 | 0 | 0 | 0 | 0 | 0 | 0 | 1 | 1 | 0 | 0 | 2 |
| Cluster11420 Verrucom Subdivision3 Subdivision3_ξ        | 0 | 0 | 0 | 0 | 0 | 1 | 0 | 1 | 0 | 0 | 0 | 0 | 2 |
| Cluster11465 Proteobac Alphap Ricke Ricketts Rickettsia  | 1 | 0 | 0 | 0 | 1 | 0 | 0 | 0 | 0 | 0 | 0 | 0 | 2 |
| Cluster11483 Proteobac Deltap Myxc Polyangiaceae         | 0 | 0 | 0 | 0 | 1 | 0 | 0 | 0 | 0 | 0 | 0 | 1 | 2 |
| Cluster11493 Proteobac Alphaproteobacteria               | 0 | 0 | 0 | 0 | 0 | 1 | 0 | 0 | 0 | 0 | 1 | 0 | 2 |
| Cluster11496 Gemmatir Gemm Geml Gemma Gemmatimonæ        | 0 | 0 | 0 | 0 | 0 | 0 | 0 | 1 | 0 | 0 | 1 | 0 | 2 |
| Cluster11548;size=7                                      | 0 | 0 | 0 | 0 | 0 | 0 | 1 | 0 | 0 | 0 | 0 | 1 | 2 |
| Cluster11570;size=6                                      | 0 | 0 | 0 | 0 | 0 | 1 | 1 | 0 | 0 | 0 | 0 | 0 | 2 |
| Cluster11591 Acidobact Acidobacteria_Gp1                 | 0 | 0 | 1 | 0 | 0 | 0 | 0 | 1 | 0 | 0 | 0 | 0 | 2 |
| Cluster11602 Bacteroid Sphing Sphir Chitinophagaceae     | 1 | 0 | 1 | 0 | 0 | 0 | 0 | 0 | 0 | 0 | 0 | 0 | 2 |
| Cluster11609 Proteobac Deltap Myxc Cystoba Anaeromyxobæ  | 0 | 0 | 0 | 0 | 0 | 0 | 0 | 0 | 1 | 1 | 0 | 0 | 2 |
| Cluster11634 Acidobact Acidobacteria_Gp2 Gp2             | 0 | 0 | 0 | 0 | 0 | 0 | 1 | 0 | 1 | 0 | 0 | 0 | 2 |
| Cluster11656 Actinobac Actinol Actinomycetales           | 0 | 1 | 0 | 0 | 0 | 0 | 1 | 0 | 0 | 0 | 0 | 0 | 2 |
| Cluster11658;size=4                                      | 0 | 0 | 0 | 0 | 0 | 0 | 0 | 2 | 0 | 0 | 0 | 0 | 2 |







|                                                               |   |   |   |   |   |   |   |   |   |   |   |   |   |
|---------------------------------------------------------------|---|---|---|---|---|---|---|---|---|---|---|---|---|
| Cluster13322;size=13                                          | 1 | 0 | 0 | 0 | 0 | 0 | 0 | 0 | 0 | 0 | 1 | 0 | 2 |
| Cluster13371 Verrucom Opirituae                               | 0 | 0 | 0 | 0 | 0 | 0 | 1 | 0 | 0 | 0 | 0 | 1 | 2 |
| Cluster13374 Acidobact Acidobacteria_Gp2 Gp2                  | 0 | 0 | 0 | 0 | 1 | 0 | 0 | 0 | 0 | 0 | 0 | 1 | 2 |
| Cluster13378 Acidobact Acidobacteria_Gp15 Gp15                | 1 | 0 | 0 | 0 | 1 | 0 | 0 | 0 | 0 | 0 | 0 | 0 | 2 |
| Cluster13428 Actinobac Actinol Acidi Acidimii Aciditerrimonaz | 0 | 0 | 0 | 0 | 1 | 0 | 0 | 0 | 0 | 0 | 1 | 0 | 2 |
| Cluster13506;size=3                                           | 0 | 1 | 0 | 0 | 0 | 0 | 0 | 0 | 0 | 0 | 0 | 1 | 2 |
| Cluster13507 Acidobact Acidobacteria_Gp1 Granulicella         | 0 | 0 | 0 | 1 | 0 | 0 | 0 | 0 | 0 | 1 | 0 | 0 | 2 |
| Cluster13566 Acidobact Acidobacteria_Gp2 Gp2                  | 0 | 0 | 0 | 1 | 1 | 0 | 0 | 0 | 0 | 0 | 0 | 0 | 2 |
| Cluster13579 Proteobac Deltap Bdell Bdellovi Bdellovibrio     | 0 | 1 | 0 | 0 | 1 | 0 | 0 | 0 | 0 | 0 | 0 | 0 | 2 |
| Cluster13609 Acidobacteria                                    | 0 | 0 | 0 | 0 | 0 | 0 | 0 | 1 | 1 | 0 | 0 | 0 | 2 |
| Cluster13613 Bacteroid Sphing Sphir Chitinophagaceae          | 1 | 0 | 0 | 0 | 1 | 0 | 0 | 0 | 0 | 0 | 0 | 0 | 2 |
| Cluster13654 Proteobac Deltap Myxococcales                    | 2 | 0 | 0 | 0 | 0 | 0 | 0 | 0 | 0 | 0 | 0 | 0 | 2 |
| Cluster13658 Acidobact Acidobacteria_Gp3 Gp3                  | 0 | 0 | 0 | 0 | 0 | 0 | 0 | 0 | 0 | 0 | 1 | 1 | 2 |
| Cluster13708 Proteobac Alphap Rhod Acetobacteraceae           | 0 | 0 | 0 | 1 | 0 | 0 | 0 | 0 | 0 | 1 | 0 | 0 | 2 |
| Cluster13714;size=3                                           | 0 | 0 | 0 | 0 | 1 | 0 | 1 | 0 | 0 | 0 | 0 | 0 | 2 |
| Cluster13720 Acidobact Acidobacteria_Gp3 Gp3                  | 0 | 1 | 1 | 0 | 0 | 0 | 0 | 0 | 0 | 0 | 0 | 0 | 2 |
| Cluster13805;size=13                                          | 0 | 0 | 0 | 0 | 0 | 0 | 0 | 0 | 0 | 0 | 1 | 1 | 2 |
| Cluster13824 Acidobact Acidobacteria_Gp1 Gp1                  | 0 | 0 | 1 | 0 | 0 | 0 | 1 | 0 | 0 | 0 | 0 | 0 | 2 |
| Cluster13845 Proteobac Deltaproteobacteria                    | 0 | 0 | 0 | 0 | 0 | 0 | 0 | 0 | 0 | 0 | 0 | 2 | 2 |
| Cluster13871 Acidobact Acidobacteria_Gp1 Gp1                  | 0 | 0 | 1 | 0 | 0 | 1 | 0 | 0 | 0 | 0 | 0 | 0 | 2 |
| Cluster13910 Acidobact Acidobacteria_Gp3 Gp3                  | 0 | 0 | 0 | 1 | 0 | 0 | 0 | 0 | 0 | 0 | 0 | 1 | 2 |
| Cluster13914 Proteobac Alphaproteobacteria                    | 0 | 0 | 0 | 0 | 0 | 1 | 0 | 0 | 0 | 0 | 0 | 1 | 2 |
| Cluster13921 Proteobac Deltap Myxococcales                    | 0 | 0 | 0 | 0 | 0 | 0 | 1 | 0 | 0 | 0 | 1 | 0 | 2 |
| Cluster13996;size=8                                           | 0 | 0 | 1 | 0 | 0 | 0 | 1 | 0 | 0 | 0 | 0 | 0 | 2 |
| Cluster14054 Proteobac Deltap Myxococcales                    | 1 | 0 | 0 | 0 | 0 | 0 | 0 | 0 | 1 | 0 | 0 | 0 | 2 |
| Cluster14070 Firmicute: Bacilli Bacill Paeniba Paenibacillus  | 0 | 0 | 0 | 0 | 0 | 1 | 0 | 0 | 1 | 0 | 0 | 0 | 2 |
| Cluster14107 Acidobact Acidobacteria_Gp1 Granulicella         | 1 | 0 | 0 | 1 | 0 | 0 | 0 | 0 | 0 | 0 | 0 | 0 | 2 |
| Cluster14163 Acidobact Acidobacteria_Gp1                      | 0 | 0 | 0 | 0 | 0 | 1 | 0 | 0 | 1 | 0 | 0 | 0 | 2 |
| Cluster14208 Acidobact Acidobacteria_Gp2 Gp2                  | 0 | 0 | 1 | 0 | 0 | 0 | 0 | 0 | 1 | 0 | 0 | 0 | 2 |



|              |                |                     |                     |                   |               |   |   |   |   |   |   |   |   |   |   |
|--------------|----------------|---------------------|---------------------|-------------------|---------------|---|---|---|---|---|---|---|---|---|---|
| Cluster14866 | Proteobac      | Gammaproteobacteria | 0                   | 0                 | 1             | 0 | 0 | 0 | 1 | 0 | 0 | 0 | 0 | 2 |   |
| Cluster14922 | Acidobact      | Acidobacteria_Gp2   | Gp2                 | 1                 | 0             | 0 | 0 | 0 | 0 | 0 | 0 | 1 | 0 | 2 |   |
| Cluster14998 | Chlamydi       | Chlamy              | Chlar               | Parachl           | Parachlamydia | 0 | 1 | 0 | 0 | 0 | 0 | 0 | 1 | 0 | 2 |
| Cluster15020 | Proteobac      | Alphap              | Alphaproteot        | Rhizomicrobiu     |               | 0 | 0 | 0 | 0 | 0 | 0 | 1 | 0 | 2 |   |
| Cluster15048 | Acidobact      | Acidobacteria_Gp1   | Edaphobacter        |                   |               | 0 | 1 | 0 | 0 | 1 | 0 | 0 | 0 | 2 |   |
| Cluster15122 | Proteobac      | Betaproteobacteria  |                     |                   |               | 0 | 0 | 0 | 0 | 0 | 0 | 1 | 0 | 2 |   |
| Cluster15144 | Chlamydi       | Chlamy              | Chlar               | Parachlamydiaceae |               | 0 | 1 | 0 | 1 | 0 | 0 | 0 | 0 | 2 |   |
| Cluster15147 | Acidobact      | Acidobacteria_Gp2   | Gp2                 |                   |               | 0 | 0 | 0 | 0 | 0 | 0 | 0 | 1 | 2 |   |
| Cluster15167 | Proteobac      | Deltap              | Myxococcales        |                   |               | 0 | 1 | 0 | 0 | 0 | 0 | 0 | 0 | 2 |   |
| Cluster15177 | Acidobact      | Acidobacteria_Gp2   | Gp2                 |                   |               | 0 | 0 | 0 | 0 | 0 | 0 | 1 | 0 | 2 |   |
| Cluster15251 | Acidobact      | Acidobacteria_Gp1   | Gp1                 |                   |               | 2 | 0 | 0 | 0 | 0 | 0 | 0 | 0 | 2 |   |
| Cluster15305 | Proteobacteria |                     |                     |                   |               | 2 | 0 | 0 | 0 | 0 | 0 | 0 | 0 | 2 |   |
| Cluster15319 | Proteobac      | Deltap              | Myxococcales        |                   |               | 0 | 0 | 1 | 0 | 0 | 0 | 1 | 0 | 2 |   |
| Cluster15342 | Acidobact      | Acidobacteria_Gp1   |                     |                   |               | 2 | 0 | 0 | 0 | 0 | 0 | 0 | 0 | 2 |   |
| Cluster15359 | Proteobac      | Gamm                | Xanti               | Sinobacteraceae   |               | 2 | 0 | 0 | 0 | 0 | 0 | 0 | 0 | 2 |   |
| Cluster15363 | Acidobact      | Acidobacteria_Gp1   |                     |                   |               | 0 | 0 | 0 | 0 | 0 | 0 | 1 | 0 | 2 |   |
| Cluster15364 | Acidobact      | Acidobacteria_Gp1   | Gp1                 |                   |               | 0 | 0 | 0 | 0 | 0 | 0 | 1 | 1 | 2 |   |
| Cluster15373 | Acidobact      | Acidobacteria_Gp2   | Gp2                 |                   |               | 0 | 0 | 0 | 0 | 0 | 0 | 1 | 0 | 2 |   |
| Cluster15384 | Acidobact      | Acidobacteria_Gp1   |                     |                   |               | 0 | 1 | 0 | 0 | 0 | 0 | 1 | 0 | 2 |   |
| Cluster15411 | Actinobac      | Actinol             | Actinomycetales     |                   |               | 2 | 0 | 0 | 0 | 0 | 0 | 0 | 0 | 2 |   |
| Cluster15446 | TM7            |                     | TM7_genera_i        |                   |               | 0 | 0 | 0 | 1 | 0 | 0 | 0 | 0 | 2 |   |
| Cluster15448 | Acidobact      | Acidobacteria_Gp6   | Gp6                 |                   |               | 0 | 0 | 0 | 0 | 0 | 0 | 1 | 0 | 2 |   |
| Cluster15455 | Acidobact      | Acidobacteria_Gp1   |                     |                   |               | 0 | 0 | 2 | 0 | 0 | 0 | 0 | 0 | 2 |   |
| Cluster15461 | Proteobac      | Alphap              | Rhizobiales         |                   |               | 0 | 0 | 0 | 0 | 1 | 0 | 0 | 0 | 2 |   |
| Cluster15491 | Actinobac      | Actinol             | Solirubrobacterales |                   |               | 0 | 0 | 0 | 1 | 0 | 0 | 0 | 0 | 2 |   |
| Cluster15494 | Acidobact      | Acidobacteria_Gp1   |                     |                   |               | 0 | 0 | 0 | 0 | 1 | 0 | 1 | 0 | 2 |   |
| Cluster15506 | Proteobac      | Deltaproteobacteria |                     |                   |               | 1 | 1 | 0 | 0 | 0 | 0 | 0 | 0 | 2 |   |
| Cluster15560 | Acidobact      | Acidobacteria_Gp3   | Gp3                 |                   |               | 0 | 0 | 0 | 0 | 0 | 0 | 2 | 0 | 2 |   |
| Cluster15567 | Acidobact      | Acidobacteria_Gp1   | Gp1                 |                   |               | 0 | 0 | 0 | 0 | 1 | 0 | 0 | 0 | 2 |   |

|              |           |                     |                  |                   |                |   |   |   |   |   |   |   |   |   |   |   |   |   |
|--------------|-----------|---------------------|------------------|-------------------|----------------|---|---|---|---|---|---|---|---|---|---|---|---|---|
| Cluster15581 | Actinobac | Actinol             | Soliru           | Solirubr          | Solirubrobacte | 0 | 1 | 0 | 0 | 0 | 0 | 0 | 1 | 0 | 0 | 0 | 0 | 2 |
| Cluster15600 | Chlamydi  | Chlamy              | Chlar            | Parachlamydiaceae |                | 0 | 0 | 0 | 0 | 0 | 0 | 2 | 0 | 0 | 0 | 0 | 0 | 2 |
| Cluster15614 | Acidobact | Acidobacteria_Gp1   | Gp1              |                   |                | 0 | 0 | 0 | 0 | 0 | 0 | 1 | 0 | 1 | 0 | 0 | 0 | 2 |
| Cluster15635 | Acidobact | Acidobacteria_Gp1   | Gp1              |                   |                | 0 | 0 | 0 | 0 | 2 | 0 | 0 | 0 | 0 | 0 | 0 | 0 | 2 |
| Cluster15687 | Proteobac | Alphaproteobacteria |                  |                   |                | 0 | 0 | 0 | 0 | 0 | 0 | 1 | 1 | 0 | 0 | 0 | 0 | 2 |
| Cluster15690 | Acidobact | Acidobacteria_Gp1   |                  |                   |                | 0 | 0 | 0 | 1 | 0 | 0 | 0 | 0 | 0 | 1 | 0 | 0 | 2 |
| Cluster15740 | Proteobac | Alphap              | Rhod             | Acetobacteraceae  |                | 0 | 0 | 0 | 1 | 0 | 0 | 0 | 1 | 0 | 0 | 0 | 0 | 2 |
| Cluster15751 | Proteobac | Gamm                | Legio            | Coxiella          | Aquicella      | 0 | 0 | 1 | 0 | 0 | 0 | 1 | 0 | 0 | 0 | 0 | 0 | 2 |
| Cluster15772 | Acidobact | Acidobacteria_Gp2   | Gp2              |                   |                | 0 | 0 | 0 | 0 | 0 | 0 | 0 | 1 | 0 | 0 | 1 | 0 | 2 |
| Cluster15774 | Acidobact | Acidobacteria_Gp10  | Gp10             |                   |                | 0 | 1 | 0 | 1 | 0 | 0 | 0 | 0 | 0 | 0 | 0 | 0 | 2 |
| Cluster15802 | ;size=4   |                     |                  |                   |                | 0 | 0 | 1 | 0 | 0 | 0 | 0 | 1 | 0 | 0 | 0 | 0 | 2 |
| Cluster15833 | Actinobac | Actinol             | Actinomycetales  |                   |                | 0 | 0 | 0 | 0 | 0 | 0 | 0 | 0 | 0 | 0 | 1 | 1 | 2 |
| Cluster15846 | Armatimc  | Chthor              | Chth             | Chthon            | Chthonomona    | 0 | 0 | 1 | 1 | 0 | 0 | 0 | 0 | 0 | 0 | 0 | 0 | 2 |
| Cluster15847 | Acidobact | Acidobacteria_Gp1   |                  |                   |                | 0 | 0 | 1 | 0 | 0 | 0 | 0 | 0 | 0 | 0 | 0 | 1 | 2 |
| Cluster15848 | Acidobact | Acidobacteria_Gp3   | Gp3              |                   |                | 0 | 0 | 0 | 1 | 0 | 0 | 0 | 0 | 0 | 0 | 0 | 1 | 2 |
| Cluster15880 | Acidobact | Acidobacteria_Gp3   |                  |                   |                | 0 | 1 | 1 | 0 | 0 | 0 | 0 | 0 | 0 | 0 | 0 | 0 | 2 |
| Cluster15885 | Acidobact | Acidobacteria_Gp2   | Gp2              |                   |                | 0 | 1 | 0 | 0 | 0 | 0 | 0 | 0 | 1 | 0 | 0 | 0 | 2 |
| Cluster15888 | ;size=7   |                     |                  |                   |                | 0 | 0 | 0 | 1 | 0 | 0 | 0 | 1 | 0 | 0 | 0 | 0 | 2 |
| Cluster15957 | ;size=2   |                     |                  |                   |                | 0 | 0 | 0 | 0 | 0 | 0 | 1 | 1 | 0 | 0 | 0 | 0 | 2 |
| Cluster15962 | Acidobact | Acidobacteria_Gp2   | Gp2              |                   |                | 0 | 0 | 0 | 0 | 0 | 0 | 1 | 0 | 0 | 0 | 1 | 0 | 2 |
| Cluster15985 | Proteobac | Alphaproteobacteria |                  |                   |                | 0 | 1 | 0 | 0 | 0 | 1 | 0 | 0 | 0 | 0 | 0 | 0 | 2 |
| Cluster16050 | Proteobac | Alphap              | Rhizc            | Bradyrhizobiaceae |                | 0 | 0 | 1 | 0 | 0 | 0 | 0 | 0 | 1 | 0 | 0 | 0 | 2 |
| Cluster16121 | Acidobact | Acidobacteria_Gp3   | Bryobacter       |                   |                | 0 | 0 | 0 | 0 | 0 | 1 | 0 | 0 | 1 | 0 | 0 | 0 | 2 |
| Cluster16136 | Proteobac | Alphap              | Caulc            | Caulob            | Phenylobacter  | 0 | 0 | 0 | 0 | 0 | 0 | 1 | 0 | 0 | 0 | 1 | 0 | 2 |
| Cluster16145 | Actinobac | Actinol             | Soliru           | Conexib           | Conexibacter   | 0 | 0 | 0 | 1 | 1 | 0 | 0 | 0 | 0 | 0 | 0 | 0 | 2 |
| Cluster16146 | Proteobac | Alphap              | Rhodospirillales |                   |                | 0 | 0 | 0 | 0 | 0 | 0 | 0 | 0 | 0 | 0 | 0 | 2 | 2 |
| Cluster16147 | Bacteroid | Sphing              | Sphir            | Chitinophagaceae  |                | 0 | 0 | 1 | 1 | 0 | 0 | 0 | 0 | 0 | 0 | 0 | 0 | 2 |
| Cluster16149 | Acidobact | Acidobacteria_Gp1   |                  |                   |                | 0 | 0 | 0 | 1 | 1 | 0 | 0 | 0 | 0 | 0 | 0 | 0 | 2 |
| Cluster16184 | Acidobact | Acidobacteria_Gp1   |                  |                   |                | 0 | 0 | 1 | 0 | 0 | 0 | 0 | 0 | 0 | 0 | 1 | 0 | 2 |

|              |                |                                    |   |   |   |   |   |   |   |   |   |   |   |   |
|--------------|----------------|------------------------------------|---|---|---|---|---|---|---|---|---|---|---|---|
| Cluster16207 | Proteobac      | Alphaproteobacteria                | 0 | 0 | 0 | 0 | 0 | 0 | 0 | 0 | 1 | 1 | 0 | 2 |
| Cluster16212 | Acidobact      | Acidobacteria_Gp1                  | 0 | 0 | 1 | 0 | 0 | 1 | 0 | 0 | 0 | 0 | 0 | 2 |
| Cluster16216 | Proteobac      | Gamm Legio Coxiella Coxiella       | 0 | 1 | 0 | 0 | 0 | 0 | 0 | 1 | 0 | 0 | 0 | 2 |
| Cluster16274 | Acidobact      | Acidobacteria_Gp1 Gp1              | 0 | 0 | 1 | 1 | 0 | 0 | 0 | 0 | 0 | 0 | 0 | 2 |
| Cluster16291 | Acidobact      | Acidobacteria_Gp1                  | 0 | 0 | 0 | 0 | 0 | 1 | 0 | 0 | 1 | 0 | 0 | 2 |
| Cluster16308 | Acidobact      | Acidobacteria_Gp2 Gp2              | 1 | 0 | 0 | 0 | 0 | 0 | 0 | 0 | 0 | 1 | 0 | 2 |
| Cluster16313 | Proteobac      | Gammaproteobacteria                | 0 | 0 | 0 | 0 | 2 | 0 | 0 | 0 | 0 | 0 | 0 | 2 |
| Cluster16322 | Proteobac      | Alphap Alphaproteok Rhizomicrobiu  | 0 | 0 | 1 | 0 | 0 | 0 | 0 | 1 | 0 | 0 | 0 | 2 |
| Cluster16457 | Acidobacteria  |                                    | 0 | 0 | 0 | 0 | 0 | 0 | 0 | 1 | 0 | 1 | 0 | 2 |
| Cluster16470 | Proteobac      | Gammaproteobacteria                | 0 | 0 | 0 | 0 | 2 | 0 | 0 | 0 | 0 | 0 | 0 | 2 |
| Cluster16507 | Acidobact      | Acidobacteria_Gp3                  | 0 | 0 | 0 | 0 | 0 | 2 | 0 | 0 | 0 | 0 | 0 | 2 |
| Cluster16655 | Proteobac      | Betapr Burkholderia Burkholderia   | 0 | 0 | 1 | 0 | 1 | 0 | 0 | 0 | 0 | 0 | 0 | 2 |
| Cluster16725 | Verrucom       | Opitut; Opitu Opituta Opitutus     | 0 | 0 | 0 | 0 | 0 | 0 | 0 | 0 | 1 | 0 | 1 | 2 |
| Cluster16735 | Proteobac      | Alphap Rhod Acetobacteraceae       | 0 | 0 | 0 | 0 | 0 | 0 | 0 | 0 | 0 | 2 | 0 | 2 |
| Cluster16764 | Acidobact      | Acidobacteria_Gp2 Gp2              | 0 | 0 | 0 | 1 | 0 | 0 | 0 | 0 | 1 | 0 | 0 | 2 |
| Cluster16823 | Acidobact      | Acidobacteria_Gp1                  | 0 | 0 | 1 | 0 | 0 | 0 | 0 | 0 | 0 | 0 | 1 | 2 |
| Cluster16829 | Acidobact      | Acidobacteria_Gp1 Gp1              | 0 | 0 | 0 | 0 | 0 | 0 | 0 | 0 | 2 | 0 | 0 | 2 |
| Cluster16851 | Acidobact      | Acidobacteria_Gp3 Gp3              | 0 | 0 | 0 | 0 | 1 | 0 | 0 | 0 | 1 | 0 | 0 | 2 |
| Cluster16960 | ;size=10       |                                    | 0 | 0 | 0 | 1 | 0 | 0 | 1 | 0 | 0 | 0 | 0 | 2 |
| Cluster16966 | Proteobac      | Alphap Rhizobiales                 | 0 | 0 | 0 | 0 | 0 | 0 | 1 | 1 | 0 | 0 | 0 | 2 |
| Cluster17012 | TM7            | TM7_genera_i                       | 0 | 0 | 0 | 0 | 1 | 0 | 0 | 0 | 1 | 0 | 0 | 2 |
| Cluster17172 | Acidobact      | Acidobacteria_Gp5 Gp5              | 0 | 0 | 0 | 1 | 0 | 0 | 0 | 0 | 1 | 0 | 0 | 2 |
| Cluster17217 | Acidobact      | Acidobacteria_Gp2 Gp2              | 0 | 0 | 0 | 0 | 1 | 0 | 0 | 0 | 1 | 0 | 0 | 2 |
| Cluster17225 | Proteobac      | Deltaproteobacteria                | 0 | 0 | 0 | 0 | 0 | 2 | 0 | 0 | 0 | 0 | 0 | 2 |
| Cluster17235 | Actinobac      | Actinol Actin Actinos  Actinospica | 0 | 0 | 0 | 1 | 0 | 0 | 0 | 0 | 0 | 0 | 1 | 2 |
| Cluster17288 | Proteobacteria |                                    | 0 | 0 | 0 | 0 | 0 | 0 | 2 | 0 | 0 | 0 | 0 | 2 |
| Cluster17315 | Acidobact      | Acidobacteria_Gp1 Gp1              | 0 | 0 | 0 | 1 | 0 | 0 | 0 | 1 | 0 | 0 | 0 | 2 |
| Cluster17336 | Bacteroid      | Sphing Sphir Chitinophagaceae      | 0 | 0 | 0 | 0 | 2 | 0 | 0 | 0 | 0 | 0 | 0 | 2 |
| Cluster17338 | Verrucom       | Subdivision3 Subdivision3_ξ        | 0 | 0 | 0 | 1 | 1 | 0 | 0 | 0 | 0 | 0 | 0 | 2 |

|              |                |                     |                              |   |   |   |   |   |   |   |   |   |   |   |   |   |
|--------------|----------------|---------------------|------------------------------|---|---|---|---|---|---|---|---|---|---|---|---|---|
| Cluster17401 | Acidobact      | Acidobacteria_Gp2   | Gp2                          | 0 | 0 | 0 | 0 | 1 | 0 | 0 | 0 | 0 | 0 | 1 | 0 | 2 |
| Cluster17449 | Proteobacteria |                     |                              | 0 | 1 | 0 | 0 | 0 | 0 | 0 | 0 | 0 | 1 | 0 | 0 | 2 |
| Cluster17452 | Actinobac      | Actinol             | Solirubrobacterales          | 0 | 0 | 0 | 0 | 0 | 0 | 0 | 0 | 0 | 0 | 1 | 1 | 2 |
| Cluster17460 | Proteobac      | Betapr              | Burkl Burkhol Burkholderia   | 0 | 0 | 1 | 1 | 0 | 0 | 0 | 0 | 0 | 0 | 0 | 0 | 2 |
| Cluster17469 | Acidobact      | Acidobacteria_Gp1   | Gp1                          | 0 | 0 | 1 | 0 | 1 | 0 | 0 | 0 | 0 | 0 | 0 | 0 | 2 |
| Cluster17649 | Proteobac      | Alphaproteobacteria |                              | 0 | 0 | 1 | 0 | 0 | 0 | 0 | 0 | 0 | 0 | 1 | 0 | 2 |
| Cluster17671 | Acidobact      | Acidobacteria_Gp3   | Gp3                          | 0 | 0 | 0 | 0 | 0 | 0 | 0 | 0 | 1 | 1 | 0 | 0 | 2 |
| Cluster17736 | Proteobac      | Alphap              | Rhizc Bradyrhizobiaceae      | 1 | 0 | 0 | 0 | 0 | 0 | 0 | 0 | 0 | 0 | 0 | 1 | 2 |
| Cluster17739 | Acidobact      | Acidobacteria_Gp3   | Gp3                          | 1 | 0 | 0 | 0 | 0 | 0 | 0 | 0 | 1 | 0 | 0 | 0 | 2 |
| Cluster17743 | Acidobact      | Acidobacteria_Gp3   |                              | 0 | 0 | 0 | 0 | 0 | 0 | 0 | 1 | 1 | 0 | 0 | 0 | 2 |
| Cluster17759 | Acidobacteria  |                     |                              | 0 | 0 | 2 | 0 | 0 | 0 | 0 | 0 | 0 | 0 | 0 | 0 | 2 |
| Cluster17804 | TM7            |                     | TM7_genera_i                 | 0 | 0 | 0 | 0 | 0 | 0 | 0 | 0 | 1 | 0 | 1 | 0 | 2 |
| Cluster17816 | Acidobact      | Acidobacteria_Gp2   | Gp2                          | 0 | 0 | 0 | 1 | 0 | 0 | 0 | 1 | 0 | 0 | 0 | 0 | 2 |
| Cluster17825 | ;size=4        |                     |                              | 1 | 0 | 0 | 0 | 0 | 0 | 0 | 0 | 0 | 0 | 1 | 0 | 2 |
| Cluster17826 | Verrucom       | Opitut: Opitu       | Opituta Opitutus             | 1 | 0 | 0 | 0 | 1 | 0 | 0 | 0 | 0 | 0 | 0 | 0 | 2 |
| Cluster17834 | Acidobact      | Acidobacteria_Gp2   | Gp2                          | 0 | 0 | 0 | 0 | 0 | 0 | 0 | 0 | 0 | 0 | 2 | 0 | 2 |
| Cluster17837 | Acidobact      | Acidobacteria_Gp2   | Gp2                          | 0 | 0 | 0 | 0 | 0 | 0 | 1 | 1 | 0 | 0 | 0 | 0 | 2 |
| Cluster17849 | Proteobac      | Gamm                | Xantl Sinobac Steroidobacter | 0 | 0 | 1 | 0 | 1 | 0 | 0 | 0 | 0 | 0 | 0 | 0 | 2 |
| Cluster17856 | Proteobac      | Betaproteobacteria  |                              | 0 | 0 | 0 | 0 | 0 | 0 | 0 | 2 | 0 | 0 | 0 | 0 | 2 |
| Cluster17871 | Proteobac      | Alphap              | Caulc Caulobacteraceae       | 0 | 0 | 1 | 0 | 0 | 0 | 0 | 1 | 0 | 0 | 0 | 0 | 2 |
| Cluster17878 | ;size=12       |                     |                              | 0 | 0 | 0 | 1 | 0 | 0 | 0 | 1 | 0 | 0 | 0 | 0 | 2 |
| Cluster17885 | Verrucom       | Opitut: Opitu       | Opituta Opitutus             | 2 | 0 | 0 | 0 | 0 | 0 | 0 | 0 | 0 | 0 | 0 | 0 | 2 |
| Cluster17889 | Actinobac      | Actinol             | Actinomycetales              | 0 | 0 | 0 | 1 | 0 | 0 | 0 | 0 | 0 | 0 | 1 | 0 | 2 |
| Cluster17943 | Acidobact      | Acidobacteria_Gp3   | Gp3                          | 0 | 0 | 0 | 0 | 0 | 0 | 0 | 1 | 0 | 1 | 0 | 0 | 2 |
| Cluster17949 | Acidobact      | Acidobacteria_Gp3   |                              | 0 | 0 | 0 | 0 | 0 | 0 | 0 | 0 | 0 | 0 | 2 | 0 | 2 |
| Cluster17982 | Verrucom       | Opitut: Opitu       | Opituta Opitutus             | 0 | 0 | 0 | 0 | 0 | 0 | 0 | 0 | 0 | 1 | 0 | 1 | 2 |
| Cluster18012 | Verrucom       | Opitut: Opitu       | Opituta Opitutus             | 0 | 0 | 0 | 0 | 0 | 1 | 0 | 0 | 1 | 0 | 0 | 0 | 2 |
| Cluster18015 | Actinobac      | Actinol             | Solirt Conexib Conexibacter  | 0 | 0 | 0 | 0 | 0 | 0 | 0 | 0 | 0 | 2 | 0 | 0 | 2 |
| Cluster18095 | Acidobact      | Acidobacteria_Gp2   | Gp2                          | 0 | 0 | 0 | 1 | 0 | 0 | 0 | 0 | 0 | 0 | 1 | 0 | 2 |

|              |           |        |                   |                  |   |   |   |   |   |   |   |   |   |   |   |   |   |
|--------------|-----------|--------|-------------------|------------------|---|---|---|---|---|---|---|---|---|---|---|---|---|
| Cluster18105 | Proteobac | Betapr | Burkl             | Burkholderiaceae | 0 | 1 | 0 | 0 | 0 | 0 | 0 | 1 | 0 | 0 | 0 | 0 | 2 |
| Cluster18154 | Acidobact |        | Acidobacteria_Gp1 |                  | 0 | 0 | 2 | 0 | 0 | 0 | 0 | 0 | 0 | 0 | 0 | 0 | 2 |
| Cluster18177 | Acidobact |        | Acidobacteria_Gp2 | Gp2              | 0 | 0 | 1 | 1 | 0 | 0 | 0 | 0 | 0 | 0 | 0 | 0 | 2 |
| Cluster18178 | Acidobact |        | Acidobacteria_Gp2 | Gp2              | 0 | 0 | 0 | 0 | 0 | 0 | 0 | 0 | 1 | 0 | 1 | 0 | 2 |
| Cluster18207 | Acidobact |        | Acidobacteria_Gp2 | Gp2              | 0 | 0 | 0 | 0 | 1 | 0 | 0 | 0 | 0 | 0 | 1 | 0 | 2 |
| Cluster18215 | Acidobact |        | Acidobacteria_Gp3 | Gp3              | 0 | 0 | 1 | 0 | 0 | 0 | 0 | 1 | 0 | 0 | 0 | 0 | 2 |
| Cluster18254 | Acidobact |        | Acidobacteria_Gp2 | Gp2              | 0 | 0 | 0 | 0 | 0 | 0 | 1 | 1 | 0 | 0 | 0 | 0 | 2 |
| Cluster18256 | Acidobact |        | Acidobacteria_Gp2 | Gp2              | 0 | 0 | 1 | 0 | 0 | 0 | 1 | 0 | 0 | 0 | 0 | 0 | 2 |
| Cluster18273 | Proteobac | Alphap | Rhod              | Acetobacteraceae | 0 | 0 | 0 | 0 | 0 | 0 | 0 | 0 | 0 | 0 | 0 | 2 | 2 |
| Cluster18283 | Acidobact |        | Acidobacteria_Gp2 | Gp2              | 0 | 0 | 0 | 0 | 0 | 0 | 0 | 1 | 1 | 0 | 0 | 0 | 2 |
| Cluster18285 | Acidobact |        | Acidobacteria_Gp2 | Gp2              | 0 | 0 | 0 | 2 | 0 | 0 | 0 | 0 | 0 | 0 | 0 | 0 | 2 |
| Cluster18286 | Acidobact |        | Acidobacteria_Gp2 | Gp2              | 0 | 0 | 0 | 0 | 0 | 0 | 0 | 1 | 1 | 0 | 0 | 0 | 2 |
| Cluster18289 | size=2    |        |                   |                  | 0 | 1 | 0 | 0 | 0 | 0 | 0 | 0 | 0 | 0 | 1 | 0 | 2 |
| Cluster18290 | Acidobact |        | Acidobacteria_Gp3 | Gp3              | 0 | 0 | 1 | 0 | 1 | 0 | 0 | 0 | 0 | 0 | 0 | 0 | 2 |
| Cluster18299 | Proteobac | Alphap | Rhizobiales       |                  | 0 | 0 | 0 | 0 | 0 | 0 | 0 | 1 | 1 | 0 | 0 | 0 | 2 |
| Cluster18308 | Acidobact |        | Acidobacteria_Gp1 |                  | 0 | 0 | 1 | 1 | 0 | 0 | 0 | 0 | 0 | 0 | 0 | 0 | 2 |
| Cluster18309 | Acidobact |        | Acidobacteria_Gp3 | Gp3              | 0 | 1 | 0 | 1 | 0 | 0 | 0 | 0 | 0 | 0 | 0 | 0 | 2 |
| Cluster18396 | Acidobact |        | Acidobacteria_Gp2 | Gp2              | 0 | 0 | 0 | 1 | 0 | 0 | 0 | 0 | 1 | 0 | 0 | 0 | 2 |
| Cluster18405 | Acidobact |        | Acidobacteria_Gp2 | Gp2              | 1 | 0 | 0 | 0 | 0 | 0 | 0 | 0 | 0 | 0 | 1 | 0 | 2 |
| Cluster18422 | Acidobact |        | Acidobacteria_Gp2 | Gp2              | 0 | 0 | 1 | 0 | 0 | 0 | 0 | 0 | 0 | 1 | 0 | 0 | 2 |
| Cluster18428 | Acidobact |        | Acidobacteria_Gp3 | Gp3              | 0 | 0 | 1 | 0 | 0 | 0 | 0 | 1 | 0 | 0 | 0 | 0 | 2 |
| Cluster18439 | TM7       |        |                   | TM7_genera_i     | 0 | 0 | 0 | 0 | 0 | 0 | 0 | 1 | 1 | 0 | 0 | 0 | 2 |
| Cluster18484 | Acidobact |        | Acidobacteria_Gp2 | Gp2              | 0 | 0 | 1 | 1 | 0 | 0 | 0 | 0 | 0 | 0 | 0 | 0 | 2 |
| Cluster18485 | Proteobac | Betapr | Burkl             | Burkholderia     | 1 | 0 | 0 | 0 | 0 | 0 | 0 | 0 | 0 | 0 | 0 | 1 | 2 |
| Cluster18496 | Acidobact |        | Acidobacteria_Gp1 |                  | 0 | 0 | 0 | 0 | 1 | 0 | 1 | 0 | 0 | 0 | 0 | 0 | 2 |
| Cluster18515 | Acidobact |        | Acidobacteria_Gp2 | Gp2              | 0 | 0 | 0 | 1 | 0 | 0 | 0 | 0 | 0 | 0 | 0 | 1 | 2 |
| Cluster18527 | Acidobact |        | Acidobacteria_Gp1 |                  | 0 | 0 | 0 | 0 | 0 | 0 | 0 | 0 | 0 | 1 | 1 | 0 | 2 |
| Cluster18549 | Proteobac | Alphap | Alphaproteot      | Rhizomicrobiu    | 0 | 0 | 0 | 1 | 0 | 1 | 0 | 0 | 0 | 0 | 0 | 0 | 2 |
| Cluster18570 | Acidobact |        | Acidobacteria_Gp2 | Gp2              | 1 | 0 | 0 | 0 | 0 | 0 | 0 | 1 | 0 | 0 | 0 | 0 | 2 |

|                                                            |   |   |   |   |   |   |   |   |   |   |   |   |   |
|------------------------------------------------------------|---|---|---|---|---|---|---|---|---|---|---|---|---|
| Cluster18576 Actinobac Actinol Actinomycetales             | 0 | 0 | 0 | 0 | 0 | 0 | 1 | 0 | 0 | 0 | 1 | 0 | 2 |
| Cluster18617 Acidobact Acidobacteria_Gp3 Gp3               | 0 | 0 | 0 | 1 | 0 | 0 | 0 | 0 | 0 | 0 | 0 | 1 | 2 |
| Cluster18632 Acidobact Acidobacteria_Gp2 Gp2               | 0 | 0 | 1 | 1 | 0 | 0 | 0 | 0 | 0 | 0 | 0 | 0 | 2 |
| Cluster18665 Proteobacteria                                | 0 | 0 | 0 | 1 | 0 | 0 | 0 | 0 | 1 | 0 | 0 | 0 | 2 |
| Cluster18675 Acidobact Acidobacteria_Gp1                   | 0 | 0 | 0 | 1 | 0 | 0 | 0 | 0 | 0 | 1 | 0 | 0 | 2 |
| Cluster18695 Proteobac Alphap Rhizobiales                  | 0 | 0 | 0 | 1 | 0 | 0 | 0 | 0 | 0 | 0 | 1 | 0 | 2 |
| Cluster18717 Acidobact Acidobacteria_Gp3                   | 0 | 2 | 0 | 0 | 0 | 0 | 0 | 0 | 0 | 0 | 0 | 0 | 2 |
| Cluster18719 Acidobact Acidobacteria_Gp2 Gp2               | 0 | 0 | 0 | 0 | 1 | 0 | 0 | 1 | 0 | 0 | 0 | 0 | 2 |
| Cluster18738 Acidobact Acidobacteria_Gp2 Gp2               | 0 | 0 | 0 | 1 | 0 | 0 | 0 | 0 | 0 | 0 | 0 | 1 | 2 |
| Cluster18739;size=3                                        | 0 | 0 | 0 | 1 | 0 | 0 | 0 | 0 | 0 | 0 | 0 | 1 | 2 |
| Cluster18775 Proteobac Gammaproteobacteria                 | 1 | 0 | 0 | 0 | 0 | 0 | 0 | 0 | 0 | 0 | 0 | 1 | 2 |
| Cluster18782 Proteobac Gammaproteobacteria                 | 0 | 0 | 0 | 0 | 1 | 0 | 0 | 0 | 1 | 0 | 0 | 0 | 2 |
| Cluster18840 Chlamydi: Chlamy Chlar Parachlamydiaceae      | 0 | 1 | 0 | 0 | 0 | 0 | 0 | 0 | 0 | 0 | 0 | 1 | 2 |
| Cluster18890 Proteobac Gamm Xantl Xanthomonadaceae         | 0 | 1 | 1 | 0 | 0 | 0 | 0 | 0 | 0 | 0 | 0 | 0 | 2 |
| Cluster18912 Acidobact Acidobacteria_Gp1                   | 0 | 0 | 0 | 0 | 0 | 0 | 0 | 0 | 0 | 2 | 0 | 0 | 2 |
| Cluster18924 Acidobact Acidobacteria_Gp2 Gp2               | 0 | 0 | 0 | 1 | 0 | 0 | 0 | 0 | 0 | 1 | 0 | 0 | 2 |
| Cluster18934;size=2                                        | 0 | 0 | 0 | 0 | 0 | 0 | 0 | 0 | 0 | 2 | 0 | 0 | 2 |
| Cluster18935 Proteobac Alphap Rhodospirillales             | 0 | 0 | 0 | 0 | 0 | 0 | 0 | 1 | 0 | 0 | 0 | 1 | 2 |
| Cluster18963 Proteobac Betapr Burkli Comamonadaceae        | 0 | 0 | 0 | 0 | 0 | 0 | 0 | 2 | 0 | 0 | 0 | 0 | 2 |
| Cluster18971;size=5                                        | 0 | 0 | 0 | 0 | 0 | 0 | 1 | 0 | 0 | 1 | 0 | 0 | 2 |
| Cluster19008 Acidobact Acidobacteria_Gp2 Gp2               | 1 | 0 | 0 | 0 | 0 | 0 | 0 | 0 | 0 | 0 | 1 | 0 | 2 |
| Cluster19030 Proteobac Betapr Burkli Burkhol Burkholderia  | 1 | 0 | 0 | 0 | 0 | 0 | 1 | 0 | 0 | 0 | 0 | 0 | 2 |
| Cluster19037 Acidobact Acidobacteria_Gp2 Gp2               | 0 | 0 | 0 | 0 | 0 | 0 | 1 | 0 | 1 | 0 | 0 | 0 | 2 |
| Cluster19050 Proteobac Betaproteobacteria                  | 0 | 0 | 0 | 0 | 0 | 1 | 0 | 1 | 0 | 0 | 0 | 0 | 2 |
| Cluster19065 Proteobac Alphap Rhizobiales                  | 0 | 1 | 0 | 0 | 0 | 0 | 0 | 0 | 0 | 0 | 1 | 0 | 2 |
| Cluster19109 Acidobacteria                                 | 0 | 0 | 1 | 0 | 0 | 0 | 0 | 1 | 0 | 0 | 0 | 0 | 2 |
| Cluster19114 Actinobac Actinol Solirl Conexib Conexibacter | 0 | 0 | 1 | 0 | 0 | 0 | 0 | 0 | 0 | 1 | 0 | 0 | 2 |
| Cluster19159 Planctomycetes                                | 0 | 0 | 0 | 0 | 0 | 0 | 1 | 0 | 0 | 0 | 1 | 0 | 2 |
| Cluster19164 Acidobact Acidobacteria_Gp2 Gp2               | 0 | 0 | 0 | 0 | 0 | 1 | 0 | 0 | 0 | 1 | 0 | 0 | 2 |



|                                                          |   |   |   |   |   |   |   |   |   |   |   |   |   |
|----------------------------------------------------------|---|---|---|---|---|---|---|---|---|---|---|---|---|
| Cluster19185 Acidobact Acidobacteria_Gp2 Gp2             | 1 | 0 | 0 | 0 | 0 | 0 | 0 | 1 | 0 | 0 | 0 | 0 | 2 |
| Cluster19188 Proteobac Alphaproteobacteria               | 1 | 0 | 0 | 0 | 0 | 0 | 0 | 1 | 0 | 0 | 0 | 0 | 2 |
| Cluster19201 Acidobact Acidobacteria_Gp3                 | 0 | 0 | 1 | 0 | 0 | 0 | 0 | 0 | 0 | 0 | 0 | 1 | 2 |
| Cluster19230 Acidobact Acidobacteria_Gp2 Gp2             | 0 | 0 | 0 | 0 | 0 | 1 | 1 | 0 | 0 | 0 | 0 | 0 | 2 |
| Cluster19235 Chloroflex Ktedor Ktedonobacterales         | 0 | 0 | 0 | 0 | 0 | 0 | 0 | 1 | 0 | 0 | 0 | 1 | 2 |
| Cluster19244 Verrucom Opitut: Opitu Opituta Opitutus     | 1 | 0 | 1 | 0 | 0 | 0 | 0 | 0 | 0 | 0 | 0 | 0 | 2 |
| Cluster19254 Acidobact Acidobacteria_Gp2 Gp2             | 0 | 0 | 0 | 0 | 0 | 0 | 0 | 2 | 0 | 0 | 0 | 0 | 2 |
| Cluster19262 Proteobac Alpha Rhizomicrobiu               | 0 | 0 | 0 | 0 | 0 | 0 | 0 | 1 | 1 | 0 | 0 | 0 | 2 |
| Cluster19264 Proteobac Betaproteobacteria                | 1 | 0 | 0 | 0 | 1 | 0 | 0 | 0 | 0 | 0 | 0 | 0 | 2 |
| Cluster19269 Acidobact Acidobacteria_Gp2 Gp2             | 0 | 0 | 0 | 2 | 0 | 0 | 0 | 0 | 0 | 0 | 0 | 0 | 2 |
| Cluster19306 Proteobac Gammaproteobacteria               | 0 | 0 | 2 | 0 | 0 | 0 | 0 | 0 | 0 | 0 | 0 | 0 | 2 |
| Cluster19307 Acidobact Acidobacteria_Gp2 Gp2             | 2 | 0 | 0 | 0 | 0 | 0 | 0 | 0 | 0 | 0 | 0 | 0 | 2 |
| Cluster19347 Proteobac Alphaproteobacteria               | 0 | 0 | 0 | 0 | 0 | 0 | 0 | 0 | 0 | 0 | 2 | 0 | 2 |
| Cluster19427;size=5                                      | 0 | 0 | 0 | 0 | 0 | 0 | 2 | 0 | 0 | 0 | 0 | 0 | 2 |
| Cluster19432 Actinobac Actinol Solirubrobacterales       | 0 | 0 | 0 | 0 | 0 | 0 | 0 | 0 | 0 | 1 | 1 | 0 | 2 |
| Cluster19447 Chloroflex Ktedor Ktedonobacterales         | 0 | 1 | 0 | 0 | 0 | 0 | 1 | 0 | 0 | 0 | 0 | 0 | 2 |
| Cluster19448 Proteobacteria                              | 0 | 0 | 0 | 0 | 0 | 0 | 2 | 0 | 0 | 0 | 0 | 0 | 2 |
| Cluster19460 Proteobac Gamm Xanti Sinobac Steroidobacter | 0 | 0 | 0 | 1 | 0 | 1 | 0 | 0 | 0 | 0 | 0 | 0 | 2 |
| Cluster19467 Proteobac Alpha Rhizobiales                 | 0 | 0 | 1 | 0 | 0 | 1 | 0 | 0 | 0 | 0 | 0 | 0 | 2 |
| Cluster19478 Acidobact Acidobacteria_Gp3 Bryobacter      | 0 | 0 | 0 | 0 | 2 | 0 | 0 | 0 | 0 | 0 | 0 | 0 | 2 |
| Cluster19512 Proteobac Alpha Rhizc Beijerinckiaceae      | 0 | 0 | 1 | 1 | 0 | 0 | 0 | 0 | 0 | 0 | 0 | 0 | 2 |
| Cluster19516 Acidobact Acidobacteria_Gp2 Gp2             | 1 | 0 | 0 | 0 | 0 | 0 | 0 | 0 | 1 | 0 | 0 | 0 | 2 |
| Cluster19522 Proteobac Alphaproteobacteria               | 1 | 0 | 0 | 0 | 1 | 0 | 0 | 0 | 0 | 0 | 0 | 0 | 2 |
| Cluster19543 Acidobact Acidobacteria_Gp1                 | 0 | 0 | 1 | 0 | 1 | 0 | 0 | 0 | 0 | 0 | 0 | 0 | 2 |
| Cluster19558 Chloroflex Ktedor Ktedonobacterales         | 0 | 0 | 0 | 0 | 0 | 0 | 1 | 1 | 0 | 0 | 0 | 0 | 2 |
| Cluster19567 Acidobact Acidobacteria_Gp2 Gp2             | 0 | 0 | 1 | 1 | 0 | 0 | 0 | 0 | 0 | 0 | 0 | 0 | 2 |
| Cluster19595 Proteobac Gammaproteobacteria               | 0 | 0 | 0 | 0 | 1 | 1 | 0 | 0 | 0 | 0 | 0 | 0 | 2 |
| Cluster19675 Acidobact Acidobacteria_Gp2 Gp2             | 1 | 0 | 1 | 0 | 0 | 0 | 0 | 0 | 0 | 0 | 0 | 0 | 2 |
| Cluster19691 Acidobact Acidobacteria_Gp1                 | 0 | 0 | 0 | 0 | 1 | 0 | 1 | 0 | 0 | 0 | 0 | 0 | 2 |

|              |                |                     |                        |   |   |   |   |   |   |   |   |   |   |   |
|--------------|----------------|---------------------|------------------------|---|---|---|---|---|---|---|---|---|---|---|
| Cluster19692 | Acidobact      | Acidobacteria_Gp2   | Gp2                    | 0 | 0 | 2 | 0 | 0 | 0 | 0 | 0 | 0 | 0 | 2 |
| Cluster19694 | Proteobac      | Alphaproteobacteria |                        | 0 | 0 | 0 | 0 | 1 | 1 | 0 | 0 | 0 | 0 | 2 |
| Cluster19700 | Acidobact      | Acidobacteria_Gp2   | Gp2                    | 0 | 0 | 1 | 0 | 0 | 0 | 1 | 0 | 0 | 0 | 2 |
| Cluster19736 | Acidobact      | Acidobacteria_Gp3   | Bryobacter             | 0 | 0 | 0 | 0 | 0 | 0 | 2 | 0 | 0 | 0 | 2 |
| Cluster19765 | Proteobac      | Betaproteobacteria  |                        | 0 | 0 | 0 | 0 | 1 | 0 | 1 | 0 | 0 | 0 | 2 |
| Cluster19795 | Acidobacteria  |                     |                        | 0 | 0 | 1 | 1 | 0 | 0 | 0 | 0 | 0 | 0 | 2 |
| Cluster19798 | Acidobact      | Acidobacteria_Gp1   | Granulicella           | 0 | 0 | 1 | 1 | 0 | 0 | 0 | 0 | 0 | 0 | 2 |
| Cluster19832 | Acidobact      | Acidobacteria_Gp2   | Gp2                    | 1 | 0 | 0 | 0 | 0 | 0 | 0 | 0 | 0 | 1 | 2 |
| Cluster19851 | Proteobac      | Gammaproteobacteria |                        | 0 | 0 | 0 | 0 | 2 | 0 | 0 | 0 | 0 | 0 | 2 |
| Cluster19864 | Acidobact      | Acidobacteria_Gp3   | Gp3                    | 0 | 0 | 0 | 1 | 1 | 0 | 0 | 0 | 0 | 0 | 2 |
| Cluster19905 | size=3         |                     |                        | 0 | 0 | 0 | 0 | 0 | 0 | 2 | 0 | 0 | 0 | 2 |
| Cluster19916 | Acidobact      | Acidobacteria_Gp2   | Gp2                    | 0 | 0 | 0 | 0 | 2 | 0 | 0 | 0 | 0 | 0 | 2 |
| Cluster19976 | Acidobact      | Acidobacteria_Gp3   |                        | 0 | 0 | 1 | 0 | 1 | 0 | 0 | 0 | 0 | 0 | 2 |
| Cluster19994 | Acidobact      | Acidobacteria_Gp2   | Gp2                    | 0 | 0 | 0 | 0 | 1 | 0 | 1 | 0 | 0 | 0 | 2 |
| Cluster19999 | size=3         |                     |                        | 2 | 0 | 0 | 0 | 0 | 0 | 0 | 0 | 0 | 0 | 2 |
| Cluster20001 | Proteobac      | Alphap Rhizc        | Bradyrh Bradyrhizobiur | 0 | 0 | 0 | 1 | 1 | 0 | 0 | 0 | 0 | 0 | 2 |
| Cluster20072 | Acidobact      | Acidobacteria_Gp2   | Gp2                    | 0 | 0 | 0 | 0 | 0 | 1 | 1 | 0 | 0 | 0 | 2 |
| Cluster20080 | Acidobact      | Acidobacteria_Gp2   | Gp2                    | 0 | 0 | 1 | 1 | 0 | 0 | 0 | 0 | 0 | 0 | 2 |
| Cluster20082 | Acidobact      | Acidobacteria_Gp3   |                        | 1 | 0 | 0 | 1 | 0 | 0 | 0 | 0 | 0 | 0 | 2 |
| Cluster20130 | Acidobact      | Acidobacteria_Gp3   | Gp3                    | 0 | 0 | 1 | 0 | 0 | 0 | 1 | 0 | 0 | 0 | 2 |
| Cluster20252 | Acidobact      | Acidobacteria_Gp2   | Gp2                    | 0 | 0 | 0 | 2 | 0 | 0 | 0 | 0 | 0 | 0 | 2 |
| Cluster20299 | Verrucom       | Opitut: Opitu       | Opituta Opitutus       | 0 | 0 | 0 | 0 | 0 | 2 | 0 | 0 | 0 | 0 | 2 |
| Cluster20318 | Proteobac      | Gammaproteobacteria |                        | 0 | 1 | 0 | 0 | 0 | 1 | 0 | 0 | 0 | 0 | 2 |
| Cluster20357 | Proteobac      | Gamm Legio          | Coxiella Aquicella     | 0 | 0 | 0 | 2 | 0 | 0 | 0 | 0 | 0 | 0 | 2 |
| Cluster20360 | Proteobac      | Betapr Burk         | Burkhol Burkholderia   | 0 | 0 | 1 | 1 | 0 | 0 | 0 | 0 | 0 | 0 | 2 |
| Cluster20366 | Acidobact      | Acidobacteria_Gp3   | Gp3                    | 0 | 0 | 0 | 0 | 1 | 0 | 1 | 0 | 0 | 0 | 2 |
| Cluster20397 | Proteobac      | Alphap Rhod         | Acetobacteraceae       | 0 | 0 | 0 | 0 | 0 | 1 | 0 | 0 | 1 | 0 | 2 |
| Cluster20457 | Acidobact      | Acidobacteria_Gp2   | Gp2                    | 1 | 0 | 1 | 0 | 0 | 0 | 0 | 0 | 0 | 0 | 2 |
| Cluster20485 | Proteobacteria |                     |                        | 0 | 1 | 0 | 0 | 1 | 0 | 0 | 0 | 0 | 0 | 2 |

|              |                |                   |                  |   |   |   |   |   |   |   |   |   |   |   |   |   |
|--------------|----------------|-------------------|------------------|---|---|---|---|---|---|---|---|---|---|---|---|---|
| Cluster20492 | Acidobact      | Acidobacteria_Gp1 | Gp1              | 0 | 0 | 0 | 1 | 0 | 0 | 0 | 1 | 0 | 0 | 0 | 0 | 2 |
| Cluster20511 | Actinobac      | Actinobacteriales |                  | 0 | 0 | 0 | 0 | 0 | 1 | 1 | 0 | 0 | 0 | 0 | 0 | 2 |
| Cluster20665 | Acidobact      | Acidobacteria_Gp2 | Gp2              | 2 | 0 | 0 | 0 | 0 | 0 | 0 | 0 | 0 | 0 | 0 | 0 | 2 |
| Cluster20676 | Acidobact      | Acidobacteria_Gp1 |                  | 0 | 0 | 0 | 0 | 0 | 0 | 1 | 0 | 0 | 1 | 0 | 0 | 2 |
| Cluster20711 | Proteobac      | Gamma             | Proteobacteria   | 0 | 0 | 0 | 1 | 0 | 0 | 0 | 0 | 0 | 0 | 1 | 0 | 2 |
| Cluster20730 | Bacteroid      | Sphing            | Chitinophagaceae | 2 | 0 | 0 | 0 | 0 | 0 | 0 | 0 | 0 | 0 | 0 | 0 | 2 |
| Cluster20755 | Proteobac      | Gamma             | Xanthomonadales  | 0 | 0 | 0 | 1 | 0 | 0 | 1 | 0 | 0 | 0 | 0 | 0 | 2 |
| Cluster20756 | Acidobact      | Acidobacteria_Gp2 | Gp2              | 1 | 0 | 0 | 0 | 0 | 0 | 1 | 0 | 0 | 0 | 0 | 0 | 2 |
| Cluster20802 | Proteobac      | Gamma             | Xanthomonadales  | 0 | 0 | 0 | 0 | 1 | 0 | 0 | 0 | 0 | 0 | 1 | 0 | 2 |
| Cluster20877 | Acidobact      | Acidobacteria_Gp2 | Gp2              | 0 | 0 | 0 | 1 | 0 | 0 | 1 | 0 | 0 | 0 | 0 | 0 | 2 |
| Cluster20936 | Proteobac      | Gamma             | Proteobacteria   | 0 | 1 | 0 | 0 | 1 | 0 | 0 | 0 | 0 | 0 | 0 | 0 | 2 |
| Cluster20967 | ;size=2        |                   |                  | 1 | 0 | 0 | 0 | 0 | 0 | 1 | 0 | 0 | 0 | 0 | 0 | 2 |
| Cluster20979 | Proteobac      | Delta             | Myxococcales     | 2 | 0 | 0 | 0 | 0 | 0 | 0 | 0 | 0 | 0 | 0 | 0 | 2 |
| Cluster20998 | Acidobact      | Acidobacteria_Gp2 | Gp2              | 0 | 0 | 0 | 2 | 0 | 0 | 0 | 0 | 0 | 0 | 0 | 0 | 2 |
| Cluster21027 | Verrucom       | Opirit            | Opirit           | 2 | 0 | 0 | 0 | 0 | 0 | 0 | 0 | 0 | 0 | 0 | 0 | 2 |
| Cluster21030 | Acidobact      | Acidobacteria_Gp2 | Gp2              | 1 | 0 | 0 | 0 | 0 | 0 | 1 | 0 | 0 | 0 | 0 | 0 | 2 |
| Cluster21042 | Acidobact      | Acidobacteria_Gp2 | Gp2              | 2 | 0 | 0 | 0 | 0 | 0 | 0 | 0 | 0 | 0 | 0 | 0 | 2 |
| Cluster21217 | Proteobac      | Alpha             | Rhizobiales      | 0 | 0 | 0 | 0 | 0 | 0 | 2 | 0 | 0 | 0 | 0 | 0 | 2 |
| Cluster21356 | Proteobac      | Alpha             | Caulobacteriales | 0 | 0 | 0 | 0 | 0 | 0 | 0 | 1 | 0 | 1 | 0 | 0 | 2 |
| Cluster21430 | Acidobact      | Acidobacteria_Gp2 | Gp2              | 0 | 0 | 0 | 0 | 0 | 0 | 1 | 0 | 0 | 0 | 0 | 1 | 2 |
| Cluster21531 | ;size=2        |                   |                  | 0 | 0 | 1 | 1 | 0 | 0 | 0 | 0 | 0 | 0 | 0 | 0 | 2 |
| Cluster21667 | Acidobact      | Acidobacteria_Gp3 | Gp3              | 1 | 0 | 0 | 0 | 0 | 0 | 0 | 0 | 0 | 0 | 1 | 0 | 2 |
| Cluster21684 | ;size=2        |                   |                  | 0 | 0 | 0 | 0 | 0 | 0 | 0 | 0 | 0 | 0 | 2 | 0 | 2 |
| Cluster21738 | Proteobacteria |                   |                  | 0 | 0 | 0 | 0 | 0 | 0 | 0 | 0 | 0 | 0 | 0 | 2 | 2 |
| Cluster21758 | Acidobact      | Acidobacteria_Gp2 | Gp2              | 0 | 0 | 1 | 0 | 0 | 0 | 0 | 1 | 0 | 0 | 0 | 0 | 2 |
| Cluster21761 | Acidobact      | Acidobacteria_Gp3 | Gp3              | 1 | 0 | 0 | 0 | 0 | 1 | 0 | 0 | 0 | 0 | 0 | 0 | 2 |
| Cluster21778 | ;size=5        |                   |                  | 0 | 0 | 0 | 0 | 0 | 0 | 0 | 0 | 1 | 0 | 1 | 0 | 2 |
| Cluster21779 | ;size=2        |                   |                  | 0 | 0 | 0 | 1 | 0 | 0 | 0 | 0 | 0 | 0 | 0 | 1 | 2 |
| Cluster21789 | Acidobact      | Acidobacteria_Gp2 | Gp2              | 1 | 0 | 0 | 0 | 0 | 0 | 1 | 0 | 0 | 0 | 0 | 0 | 2 |

|                     |                |                     |                     |                  |                |   |   |   |   |   |   |   |   |   |   |   |   |   |   |
|---------------------|----------------|---------------------|---------------------|------------------|----------------|---|---|---|---|---|---|---|---|---|---|---|---|---|---|
| Cluster21811        | Proteobac      | Gamm                | Xanti               | Sinobac          | Steroidobacter | 1 | 0 | 0 | 1 | 0 | 0 | 0 | 0 | 0 | 0 | 0 | 0 | 0 | 2 |
| Cluster21848        | Acidobact      | Acidobacteria       | _Gp1                |                  |                | 0 | 1 | 0 | 0 | 0 | 0 | 1 | 0 | 0 | 0 | 0 | 0 | 0 | 2 |
| Cluster21876        | Actinobac      | Actinol             | Acidi               | Acidimii         | Aciditerrimona | 0 | 0 | 1 | 0 | 0 | 0 | 1 | 0 | 0 | 0 | 0 | 0 | 0 | 2 |
| Cluster21882        | Proteobac      | Alphaproteobacteria |                     |                  |                | 0 | 0 | 0 | 1 | 0 | 0 | 1 | 0 | 0 | 0 | 0 | 0 | 0 | 2 |
| Cluster21934        | Actinobac      | Actinol             | Acidi               | Acidimii         | Aciditerrimona | 0 | 0 | 0 | 2 | 0 | 0 | 0 | 0 | 0 | 0 | 0 | 0 | 0 | 2 |
| Cluster21954        | Proteobacteria |                     |                     |                  |                | 0 | 0 | 1 | 1 | 0 | 0 | 0 | 0 | 0 | 0 | 0 | 0 | 0 | 2 |
| Cluster21956        | Proteobac      | Gammaproteobacteria |                     |                  |                | 0 | 0 | 1 | 1 | 0 | 0 | 0 | 0 | 0 | 0 | 0 | 0 | 0 | 2 |
| Cluster21990        | Acidobact      | Acidobacteria       | _Gp1                |                  |                | 0 | 1 | 0 | 1 | 0 | 0 | 0 | 0 | 0 | 0 | 0 | 0 | 0 | 2 |
| Cluster22060        | Acidobact      | Acidobacteria       | _Gp1                | Granulicella     |                | 0 | 0 | 0 | 0 | 1 | 0 | 0 | 0 | 0 | 1 | 0 | 0 | 0 | 2 |
| Cluster22069        | Acidobact      | Acidobacteria       | _Gp1                |                  |                | 1 | 0 | 0 | 0 | 0 | 0 | 0 | 0 | 1 | 0 | 0 | 0 | 0 | 2 |
| Cluster22097        | Proteobacteria |                     |                     |                  |                | 0 | 0 | 0 | 0 | 0 | 0 | 0 | 1 | 0 | 0 | 0 | 0 | 1 | 2 |
| Cluster22106        | Acidobact      | Acidobacteria       | _Gp2                | Gp2              |                | 0 | 0 | 0 | 1 | 0 | 1 | 0 | 0 | 0 | 0 | 0 | 0 | 0 | 2 |
| Cluster22126        | Proteobac      | Gammaproteobacteria |                     |                  |                | 0 | 0 | 1 | 0 | 0 | 0 | 0 | 0 | 1 | 0 | 0 | 0 | 0 | 2 |
| Cluster22132        | Acidobacteria  |                     |                     |                  |                | 0 | 0 | 1 | 0 | 0 | 0 | 0 | 0 | 0 | 0 | 0 | 0 | 1 | 2 |
| Cluster22160        | Acidobact      | Acidobacteria       | _Gp1                | Gp1              |                | 0 | 0 | 0 | 1 | 0 | 0 | 0 | 0 | 0 | 1 | 0 | 0 | 0 | 2 |
| Cluster22215        | Proteobac      | Alphap              | Caulc               | Caulobacteraceae |                | 0 | 0 | 1 | 0 | 0 | 0 | 0 | 0 | 0 | 1 | 0 | 0 | 0 | 2 |
| Cluster22224        | Actinobac      | Actinol             | Solirubrobacterales |                  |                | 0 | 0 | 0 | 0 | 0 | 1 | 0 | 0 | 1 | 0 | 0 | 0 | 0 | 2 |
| Cluster22265        | Acidobact      | Acidobacteria       | _Gp3                | Gp3              |                | 0 | 0 | 1 | 1 | 0 | 0 | 0 | 0 | 0 | 0 | 0 | 0 | 0 | 2 |
| Cluster22268        | Acidobact      | Acidobacteria       | _Gp2                | Gp2              |                | 0 | 0 | 0 | 0 | 0 | 0 | 0 | 0 | 0 | 0 | 0 | 0 | 2 | 2 |
| Cluster22313;size=5 |                |                     |                     |                  |                | 0 | 2 | 0 | 0 | 0 | 0 | 0 | 0 | 0 | 0 | 0 | 0 | 0 | 2 |
| Cluster22337        | Acidobacteria  |                     |                     |                  |                | 0 | 0 | 0 | 0 | 0 | 0 | 0 | 1 | 0 | 0 | 0 | 0 | 1 | 2 |
| Cluster22385        | Proteobac      | Alphaproteobacteria |                     |                  |                | 0 | 0 | 1 | 0 | 0 | 1 | 0 | 0 | 0 | 0 | 0 | 0 | 0 | 2 |
| Cluster22389        | Proteobac      | Alphap              | Alphaproteok        | Rhizomicrobiu    |                | 0 | 0 | 0 | 0 | 0 | 0 | 0 | 0 | 0 | 0 | 0 | 1 | 1 | 2 |
| Cluster22397        | Acidobact      | Acidobacteria       | _Gp1                |                  |                | 0 | 0 | 2 | 0 | 0 | 0 | 0 | 0 | 0 | 0 | 0 | 0 | 0 | 2 |
| Cluster22406        | Acidobact      | Acidobacteria       | _Gp1                |                  |                | 0 | 0 | 0 | 0 | 0 | 0 | 0 | 0 | 0 | 0 | 0 | 1 | 1 | 2 |
| Cluster22419        | Acidobact      | Acidobacteria       | _Gp3                | Gp3              |                | 0 | 2 | 0 | 0 | 0 | 0 | 0 | 0 | 0 | 0 | 0 | 0 | 0 | 2 |
| Cluster22448        | Proteobac      | Alphaproteobacteria |                     |                  |                | 0 | 0 | 1 | 0 | 0 | 0 | 1 | 0 | 0 | 0 | 0 | 0 | 0 | 2 |
| Cluster22463        | Acidobact      | Acidobacteria       | _Gp1                |                  |                | 0 | 0 | 0 | 0 | 1 | 0 | 0 | 0 | 0 | 1 | 0 | 0 | 0 | 2 |
| Cluster22474        | Acidobact      | Acidobacteria       | _Gp1                | Gp1              |                | 0 | 0 | 0 | 0 | 1 | 0 | 1 | 0 | 0 | 0 | 0 | 0 | 0 | 2 |





|                     |                |                     |                  |                   |                |   |   |   |   |   |   |   |   |   |   |   |   |   |
|---------------------|----------------|---------------------|------------------|-------------------|----------------|---|---|---|---|---|---|---|---|---|---|---|---|---|
| Cluster24189        | Actinobac      | Actinol             | Actinomycetales  | 0                 | 0              | 0 | 0 | 0 | 0 | 1 | 0 | 0 | 1 | 0 | 2 |   |   |   |
| Cluster24198        | Actinobac      | Actinol             | Solir            | Conexib           | Conexibacter   | 0 | 0 | 0 | 0 | 0 | 0 | 0 | 0 | 2 | 0 | 0 | 2 |   |
| Cluster24269        | Proteobac      | Gammaproteobacteria |                  |                   |                | 0 | 0 | 0 | 0 | 0 | 0 | 1 | 1 | 0 | 0 | 0 | 2 |   |
| Cluster24293        | Actinobac      | Actinol             | Actinomycetales  |                   |                | 0 | 0 | 0 | 0 | 1 | 0 | 0 | 1 | 0 | 0 | 0 | 2 |   |
| Cluster24372        | Acidobact      | Acidobacteria_Gp2   | Gp2              |                   |                | 0 | 0 | 0 | 0 | 1 | 0 | 0 | 1 | 0 | 0 | 0 | 2 |   |
| Cluster24425        | Actinobac      | Actinobacteria      |                  |                   |                | 0 | 0 | 0 | 0 | 1 | 0 | 0 | 1 | 0 | 0 | 0 | 2 |   |
| Cluster24449        | Acidobact      | Acidobacteria_Gp2   | Gp2              |                   |                | 0 | 0 | 0 | 0 | 0 | 0 | 1 | 1 | 0 | 0 | 0 | 2 |   |
| Cluster24463        | Proteobac      | Gamm                | Meth             | Methylc           | Methylobacter  | 0 | 0 | 0 | 0 | 0 | 1 | 0 | 0 | 0 | 0 | 1 | 0 | 2 |
| Cluster24478        | Actinobac      | Actinol             | Actinomycetales  |                   |                | 0 | 0 | 1 | 0 | 0 | 0 | 1 | 0 | 0 | 0 | 0 | 2 |   |
| Cluster24565        | Proteobac      | Alphap              | Alphaproteob     | Rhizomicrobiu     |                | 0 | 0 | 0 | 0 | 1 | 0 | 0 | 1 | 0 | 0 | 0 | 2 |   |
| Cluster24572        | Acidobact      | Acidobacteria_Gp1   | Gp1              |                   |                | 0 | 0 | 0 | 0 | 0 | 0 | 0 | 1 | 0 | 0 | 0 | 2 |   |
| Cluster24598        | Actinobac      | Actinol             | Actin            | Microbacteriaceae |                | 0 | 1 | 0 | 0 | 0 | 0 | 0 | 0 | 0 | 0 | 0 | 2 |   |
| Cluster24605        | Bacteroid      | Sphing              | Sphir            | Chitinophagaceae  |                | 0 | 0 | 1 | 0 | 0 | 0 | 0 | 1 | 0 | 0 | 0 | 2 |   |
| Cluster24664        | Proteobac      | Gammaproteobacteria |                  |                   |                | 0 | 1 | 0 | 0 | 0 | 0 | 0 | 0 | 0 | 0 | 1 | 2 |   |
| Cluster24707        | Proteobac      | Alphaproteobacteria |                  |                   |                | 0 | 0 | 0 | 0 | 0 | 0 | 0 | 0 | 0 | 1 | 1 | 2 |   |
| Cluster24763        | Actinobac      | Actinol             | Acidimicrobiales |                   |                | 0 | 1 | 0 | 0 | 0 | 0 | 0 | 0 | 0 | 0 | 1 | 2 |   |
| Cluster24780        | Acidobact      | Acidobacteria_Gp1   | Edaphobacter     |                   |                | 0 | 0 | 0 | 2 | 0 | 0 | 0 | 0 | 0 | 0 | 0 | 2 |   |
| Cluster24854        | Proteobac      | Gamm                | Legio            | Coxiella          | Aquicella      | 0 | 1 | 0 | 0 | 0 | 0 | 1 | 0 | 0 | 0 | 0 | 2 |   |
| Cluster24872        | Acidobact      | Acidobacteria_Gp1   | Edaphobacter     |                   |                | 0 | 0 | 0 | 0 | 0 | 0 | 0 | 0 | 1 | 0 | 1 | 2 |   |
| Cluster24882        | Acidobact      | Acidobacteria_Gp2   | Gp2              |                   |                | 0 | 0 | 0 | 1 | 0 | 0 | 1 | 0 | 0 | 0 | 0 | 2 |   |
| Cluster24962        | Proteobac      | Alphap              | Rhizobiales      |                   |                | 0 | 0 | 0 | 2 | 0 | 0 | 0 | 0 | 0 | 0 | 0 | 2 |   |
| Cluster24987        | Actinobac      | Actinol             | Actinomycetales  |                   |                | 0 | 0 | 0 | 0 | 0 | 1 | 0 | 1 | 0 | 0 | 0 | 2 |   |
| Cluster25008        | Proteobacteria |                     |                  |                   |                | 0 | 0 | 0 | 1 | 0 | 0 | 0 | 0 | 0 | 0 | 0 | 2 |   |
| Cluster25015        | Bacteroid      | Sphing              | Sphir            | Chitinophagaceae  |                | 0 | 1 | 0 | 0 | 0 | 0 | 0 | 0 | 0 | 1 | 0 | 2 |   |
| Cluster25019;size=7 |                |                     |                  |                   |                | 1 | 0 | 0 | 0 | 0 | 0 | 0 | 1 | 0 | 0 | 0 | 2 |   |
| Cluster25054        | Acidobact      | Acidobacteria_Gp2   | Gp2              |                   |                | 1 | 0 | 0 | 1 | 0 | 0 | 0 | 0 | 0 | 0 | 0 | 2 |   |
| Cluster25085;size=4 |                |                     |                  |                   |                | 0 | 0 | 1 | 0 | 1 | 0 | 0 | 0 | 0 | 0 | 0 | 2 |   |
| Cluster25092        | Bacteroid      | Sphing              | Sphir            | Chitino           | Sediminibacter | 0 | 0 | 0 | 0 | 1 | 1 | 0 | 0 | 0 | 0 | 0 | 2 |   |
| Cluster25094;size=8 |                |                     |                  |                   |                | 0 | 0 | 0 | 1 | 1 | 0 | 0 | 0 | 0 | 0 | 0 | 2 |   |





|                                                             |   |   |   |   |   |   |   |   |   |   |   |   |   |
|-------------------------------------------------------------|---|---|---|---|---|---|---|---|---|---|---|---|---|
| Cluster26464 Proteobac Alphap Rhizc Xantho Labrys           | 2 | 0 | 0 | 0 | 0 | 0 | 0 | 0 | 0 | 0 | 0 | 0 | 2 |
| Cluster26593 Proteobac Alphap Caulc Caulobæ Caulobacter     | 0 | 0 | 0 | 0 | 2 | 0 | 0 | 0 | 0 | 0 | 0 | 0 | 2 |
| Cluster26599 Bacteroid Sphing Sphir Chitinophagaceae        | 0 | 0 | 1 | 0 | 1 | 0 | 0 | 0 | 0 | 0 | 0 | 0 | 2 |
| Cluster26643 Acidobact Acidobacteria_Gp2 Gp2                | 0 | 0 | 0 | 0 | 0 | 0 | 0 | 0 | 1 | 0 | 1 | 0 | 2 |
| Cluster26669 Bacteroid Sphing Sphir Chitinophagaceae        | 0 | 0 | 0 | 2 | 0 | 0 | 0 | 0 | 0 | 0 | 0 | 0 | 2 |
| Cluster26672;size=3                                         | 0 | 0 | 0 | 0 | 0 | 0 | 1 | 0 | 0 | 0 | 1 | 0 | 2 |
| Cluster26699 Actinobac Actinol Actinomycetales              | 1 | 0 | 0 | 0 | 0 | 0 | 0 | 0 | 0 | 0 | 0 | 1 | 2 |
| Cluster26719 Bacteroid Sphing Sphir Chitinophagaceae        | 0 | 0 | 0 | 0 | 0 | 0 | 0 | 0 | 0 | 1 | 1 | 0 | 2 |
| Cluster26735 Acidobact Acidobacteria_Gp3 Bryobacter         | 0 | 0 | 0 | 1 | 0 | 0 | 1 | 0 | 0 | 0 | 0 | 0 | 2 |
| Cluster26767 Acidobact Acidobacteria_Gp3 Gp3                | 0 | 1 | 0 | 0 | 0 | 0 | 0 | 0 | 0 | 0 | 1 | 0 | 2 |
| Cluster26770;size=7                                         | 1 | 0 | 0 | 0 | 0 | 0 | 0 | 1 | 0 | 0 | 0 | 0 | 2 |
| Cluster26802 Proteobac Alphaproteobacteria                  | 0 | 1 | 0 | 0 | 0 | 0 | 0 | 0 | 0 | 0 | 0 | 1 | 2 |
| Cluster26820 Proteobac Alphap Caulc Caulobæ Phenyllobacter  | 1 | 1 | 0 | 0 | 0 | 0 | 0 | 0 | 0 | 0 | 0 | 0 | 2 |
| Cluster26870 Bacteroid Sphing Sphir Chitinophagaceae        | 0 | 0 | 0 | 1 | 1 | 0 | 0 | 0 | 0 | 0 | 0 | 0 | 2 |
| Cluster26896 Actinobac Actinobacteria                       | 0 | 0 | 1 | 0 | 0 | 0 | 0 | 0 | 0 | 0 | 1 | 0 | 2 |
| Cluster26932 Acidobact Acidobacteria_Gp10 Gp10              | 0 | 0 | 0 | 1 | 0 | 0 | 1 | 0 | 0 | 0 | 0 | 0 | 2 |
| Cluster26953 Actinobac Actinol Acidimicrobiales             | 0 | 0 | 0 | 0 | 0 | 0 | 2 | 0 | 0 | 0 | 0 | 0 | 2 |
| Cluster26954;size=5                                         | 0 | 0 | 2 | 0 | 0 | 0 | 0 | 0 | 0 | 0 | 0 | 0 | 2 |
| Cluster26958 Bacteroid Sphing Sphir Chitino Sediminibacteri | 0 | 0 | 1 | 0 | 0 | 0 | 0 | 1 | 0 | 0 | 0 | 0 | 2 |
| Cluster27075 Acidobact Acidobacteria_Gp13 Gp13              | 0 | 0 | 0 | 0 | 0 | 0 | 0 | 1 | 1 | 0 | 0 | 0 | 2 |
| Cluster27085;size=3                                         | 1 | 0 | 0 | 1 | 0 | 0 | 0 | 0 | 0 | 0 | 0 | 0 | 2 |
| Cluster27111 Proteobac Alphap Rhizobiales                   | 0 | 0 | 0 | 0 | 0 | 0 | 0 | 0 | 0 | 2 | 0 | 0 | 2 |
| Cluster27128 Bacteroid Sphing Sphir Chitinophagaceae        | 0 | 0 | 1 | 0 | 1 | 0 | 0 | 0 | 0 | 0 | 0 | 0 | 2 |
| Cluster27206 Actinobac Actinol Acidimicrobiales             | 1 | 0 | 0 | 1 | 0 | 0 | 0 | 0 | 0 | 0 | 0 | 0 | 2 |
| Cluster27264 Bacteroid Sphing Sphir Chitinophagaceae        | 0 | 0 | 0 | 0 | 0 | 1 | 1 | 0 | 0 | 0 | 0 | 0 | 2 |
| Cluster27384 Actinobac Actinol Actinomycetales              | 0 | 0 | 0 | 0 | 0 | 0 | 0 | 0 | 1 | 0 | 1 | 0 | 2 |
| Cluster27546 Acidobact Acidobacteria_Gp2 Gp2                | 0 | 0 | 0 | 0 | 0 | 0 | 2 | 0 | 0 | 0 | 0 | 0 | 2 |
| Cluster27597 Acidobact Acidobacteria_Gp7 Gp7                | 0 | 0 | 2 | 0 | 0 | 0 | 0 | 0 | 0 | 0 | 0 | 0 | 2 |
| Cluster27784 Bacteroid Sphing Sphir Chitinophagaceae        | 1 | 0 | 0 | 0 | 0 | 1 | 0 | 0 | 0 | 0 | 0 | 0 | 2 |



|                    |            |                                  |   |   |   |   |   |   |   |   |   |   |   |   |
|--------------------|------------|----------------------------------|---|---|---|---|---|---|---|---|---|---|---|---|
| Cluster18;size=14  | Acidobact  | Acidobacteria_Gp1                | 0 | 0 | 0 | 0 | 0 | 0 | 0 | 1 | 0 | 0 | 0 | 1 |
| Cluster41;size=14  | Proteobac  | Alphap Rhodospirillales          | 1 | 0 | 0 | 0 | 0 | 0 | 0 | 0 | 0 | 0 | 0 | 1 |
| Cluster45;size=14  | Proteobac  | Alphap Rhizobiales               | 0 | 0 | 0 | 1 | 0 | 0 | 0 | 0 | 0 | 0 | 0 | 1 |
| Cluster49;size=14  | Acidobact  | Acidobacteria_Gp2 Gp2            | 0 | 0 | 0 | 0 | 0 | 0 | 1 | 0 | 0 | 0 | 0 | 1 |
| Cluster63;size=14  |            |                                  | 0 | 1 | 0 | 0 | 0 | 0 | 0 | 0 | 0 | 0 | 0 | 1 |
| Cluster70;size=14  | Acidobact  | Acidobacteria_Gp2 Gp2            | 0 | 0 | 1 | 0 | 0 | 0 | 0 | 0 | 0 | 0 | 0 | 1 |
| Cluster73;size=14  | Armatimc   | Armati Arma Armatin Armatimonas/ | 0 | 0 | 1 | 0 | 0 | 0 | 0 | 0 | 0 | 0 | 0 | 1 |
| Cluster74;size=14  | Acidobact  | Acidobacteria_Gp1                | 0 | 0 | 0 | 0 | 0 | 1 | 0 | 0 | 0 | 0 | 0 | 1 |
| Cluster80;size=14  | Proteobac  | Deltap Myxococcales              | 0 | 1 | 0 | 0 | 0 | 0 | 0 | 0 | 0 | 0 | 0 | 1 |
| Cluster89;size=14  | Acidobact  | Acidobacteria_Gp3 Gp3            | 0 | 0 | 0 | 0 | 0 | 1 | 0 | 0 | 0 | 0 | 0 | 1 |
| Cluster101;size=16 |            |                                  | 0 | 0 | 0 | 0 | 0 | 0 | 0 | 0 | 0 | 0 | 1 | 1 |
| Cluster104;size=16 | Proteobac  | Betapr Burkli Burkholderia       | 1 | 0 | 0 | 0 | 0 | 0 | 0 | 0 | 0 | 0 | 0 | 1 |
| Cluster106;size=16 | Proteobac  | Alphap Rhizc Bradyrhizobiaceae   | 0 | 0 | 0 | 0 | 0 | 0 | 0 | 1 | 0 | 0 | 0 | 1 |
| Cluster111;size=16 | Acidobact  | Acidobacteria_Gp1 Gp1            | 0 | 0 | 0 | 0 | 0 | 0 | 1 | 0 | 0 | 0 | 0 | 1 |
| Cluster113;size=16 | Verrucom   | Spartobacteria Spartobacteria    | 0 | 0 | 0 | 0 | 0 | 0 | 0 | 0 | 0 | 1 | 0 | 1 |
| Cluster114;size=16 | Acidobact  | Acidobacteria_Gp1                | 0 | 0 | 0 | 0 | 0 | 1 | 0 | 0 | 0 | 0 | 0 | 1 |
| Cluster125;size=16 | Acidobact  | Acidobacteria_Gp3 Gp3            | 0 | 1 | 0 | 0 | 0 | 0 | 0 | 0 | 0 | 0 | 0 | 1 |
| Cluster149;size=16 | Chloroflex | Ktedor Ktedonobacterales         | 0 | 0 | 0 | 0 | 0 | 0 | 0 | 1 | 0 | 0 | 0 | 1 |
| Cluster150;size=16 | Acidobact  | Acidobacteria_Gp1 Granulicella   | 0 | 0 | 1 | 0 | 0 | 0 | 0 | 0 | 0 | 0 | 0 | 1 |
| Cluster151;size=16 | TM7        | TM7_genera_i                     | 0 | 1 | 0 | 0 | 0 | 0 | 0 | 0 | 0 | 0 | 0 | 1 |
| Cluster167;size=16 | Acidobact  | Acidobacteria_Gp2 Gp2            | 0 | 0 | 0 | 0 | 1 | 0 | 0 | 0 | 0 | 0 | 0 | 1 |
| Cluster169;size=16 | Proteobac  | Deltap Myxococcales              | 0 | 0 | 0 | 0 | 0 | 0 | 0 | 0 | 1 | 0 | 0 | 1 |
| Cluster182;size=16 | Proteobac  | Alphap Rhodospirillales          | 0 | 0 | 0 | 0 | 0 | 0 | 0 | 0 | 1 | 0 | 0 | 1 |
| Cluster185;size=16 | Acidobact  | Acidobacteria_Gp2 Gp2            | 0 | 0 | 1 | 0 | 0 | 0 | 0 | 0 | 0 | 0 | 0 | 1 |
| Cluster186;size=16 | Proteobac  | Alphap Rhizc Beijerinckiaceae    | 0 | 0 | 0 | 0 | 0 | 1 | 0 | 0 | 0 | 0 | 0 | 1 |
| Cluster188;size=16 | Acidobact  | Acidobacteria_Gp2 Gp2            | 0 | 0 | 0 | 0 | 0 | 0 | 1 | 0 | 0 | 0 | 0 | 1 |
| Cluster189;size=16 | Acidobact  | Acidobacteria_Gp1                | 0 | 0 | 0 | 0 | 0 | 0 | 0 | 0 | 0 | 1 | 0 | 1 |
| Cluster194;size=16 | Acidobact  | Acidobacteria_Gp6 Gp6            | 0 | 0 | 0 | 1 | 0 | 0 | 0 | 0 | 0 | 0 | 0 | 1 |
| Cluster204;size=16 | Chloroflex | Ktedor Ktedonobacterales         | 0 | 0 | 0 | 0 | 0 | 0 | 0 | 0 | 1 | 0 | 0 | 1 |







|                                                              |   |   |   |   |   |   |   |   |   |   |   |   |   |
|--------------------------------------------------------------|---|---|---|---|---|---|---|---|---|---|---|---|---|
| Cluster586;si Verrucom Opitut: Opitu Opituta Opitutus        | 1 | 0 | 0 | 0 | 0 | 0 | 0 | 0 | 0 | 0 | 0 | 0 | 1 |
| Cluster588;si Acidobact Acidobacteria_Gp2 Gp2                | 0 | 0 | 0 | 0 | 0 | 0 | 0 | 0 | 0 | 1 | 0 | 0 | 1 |
| Cluster590;si Acidobact Acidobacteria_Gp2 Gp2                | 0 | 0 | 0 | 0 | 0 | 0 | 0 | 0 | 0 | 0 | 0 | 1 | 1 |
| Cluster592;si Acidobact Acidobacteria_Gp3                    | 1 | 0 | 0 | 0 | 0 | 0 | 0 | 0 | 0 | 0 | 0 | 0 | 1 |
| Cluster597;si Proteobac Gammaproteobacteria                  | 0 | 0 | 0 | 0 | 1 | 0 | 0 | 0 | 0 | 0 | 0 | 0 | 1 |
| Cluster600;si Bacteroid Sphing Sphir Chitinoꝝ Ferruginibacte | 0 | 1 | 0 | 0 | 0 | 0 | 0 | 0 | 0 | 0 | 0 | 0 | 1 |
| Cluster605;si Firmicute: Clostridia                          | 0 | 0 | 0 | 0 | 0 | 0 | 0 | 1 | 0 | 0 | 0 | 0 | 1 |
| Cluster610;si Proteobac Gammaproteobacteria                  | 1 | 0 | 0 | 0 | 0 | 0 | 0 | 0 | 0 | 0 | 0 | 0 | 1 |
| Cluster612;si Proteobac Alphap Rhizobiales                   | 0 | 0 | 0 | 0 | 1 | 0 | 0 | 0 | 0 | 0 | 0 | 0 | 1 |
| Cluster614;si Proteobac Alphap Rhodospirillales              | 0 | 0 | 0 | 0 | 0 | 0 | 0 | 0 | 0 | 0 | 0 | 1 | 1 |
| Cluster635;si Verrucom Opitut: Opitu Opituta Opitutus        | 1 | 0 | 0 | 0 | 0 | 0 | 0 | 0 | 0 | 0 | 0 | 0 | 1 |
| Cluster639;si Acidobact Acidobacteria_Gp1 Gp1                | 0 | 0 | 0 | 0 | 0 | 1 | 0 | 0 | 0 | 0 | 0 | 0 | 1 |
| Cluster642;si Acidobact Acidobacteria_Gp2 Gp2                | 0 | 0 | 0 | 0 | 0 | 0 | 0 | 0 | 0 | 0 | 0 | 1 | 1 |
| Cluster644;size=1                                            | 0 | 0 | 0 | 0 | 0 | 0 | 0 | 0 | 0 | 0 | 1 | 0 | 1 |
| Cluster645;si Proteobac Alphap Rhizobiales                   | 0 | 0 | 0 | 0 | 0 | 0 | 0 | 0 | 0 | 0 | 1 | 0 | 1 |
| Cluster648;si Proteobac Betaproteobacteria                   | 0 | 0 | 0 | 0 | 0 | 0 | 0 | 0 | 0 | 0 | 0 | 1 | 1 |
| Cluster660;si Acidobact Acidobacteria_Gp2 Gp2                | 1 | 0 | 0 | 0 | 0 | 0 | 0 | 0 | 0 | 0 | 0 | 0 | 1 |
| Cluster666;si Proteobac Alphaproteobacteria                  | 0 | 0 | 0 | 0 | 0 | 0 | 0 | 1 | 0 | 0 | 0 | 0 | 1 |
| Cluster667;si Acidobact Acidobacteria_Gp1 Gp1                | 1 | 0 | 0 | 0 | 0 | 0 | 0 | 0 | 0 | 0 | 0 | 0 | 1 |
| Cluster668;si Acidobact Acidobacteria_Gp1                    | 0 | 0 | 0 | 0 | 0 | 0 | 0 | 0 | 0 | 1 | 0 | 0 | 1 |
| Cluster675;si Proteobac Gammaproteobacteria                  | 0 | 0 | 0 | 0 | 0 | 0 | 1 | 0 | 0 | 0 | 0 | 0 | 1 |
| Cluster677;si Bacteroid Sphing Sphir Sphingobacteriaceae     | 0 | 0 | 0 | 0 | 0 | 0 | 0 | 0 | 0 | 1 | 0 | 0 | 1 |
| Cluster679;si Verrucom Opitut: Opitu Opituta Opitutus        | 0 | 0 | 0 | 0 | 0 | 0 | 0 | 1 | 0 | 0 | 0 | 0 | 1 |
| Cluster680;si Proteobac Alphap Rhizobiales                   | 1 | 0 | 0 | 0 | 0 | 0 | 0 | 0 | 0 | 0 | 0 | 0 | 1 |
| Cluster684;si Acidobact Acidobacteria_Gp1 Acidobacteriur     | 1 | 0 | 0 | 0 | 0 | 0 | 0 | 0 | 0 | 0 | 0 | 0 | 1 |
| Cluster688;si Gemmatir Gemm Gemı Gemma Gemmatimonaz          | 0 | 0 | 0 | 0 | 0 | 0 | 0 | 0 | 0 | 0 | 1 | 0 | 1 |
| Cluster691;si Acidobact Acidobacteria_Gp2 Gp2                | 0 | 0 | 0 | 0 | 1 | 0 | 0 | 0 | 0 | 0 | 0 | 0 | 1 |
| Cluster693;si Proteobac Gamm Xantı Sinobac Steroidobacter    | 1 | 0 | 0 | 0 | 0 | 0 | 0 | 0 | 0 | 0 | 0 | 0 | 1 |
| Cluster697;si Proteobac Alphaproteobacteria                  | 0 | 0 | 0 | 0 | 0 | 1 | 0 | 0 | 0 | 0 | 0 | 0 | 1 |

|                                                           |   |   |   |   |   |   |   |   |   |   |   |   |   |
|-----------------------------------------------------------|---|---|---|---|---|---|---|---|---|---|---|---|---|
| Cluster701;size=1                                         | 1 | 0 | 0 | 0 | 0 | 0 | 0 | 0 | 0 | 0 | 0 | 0 | 1 |
| Cluster703;si Proteobac Deltap Myxococcales               | 0 | 0 | 0 | 0 | 0 | 0 | 0 | 0 | 0 | 0 | 0 | 0 | 1 |
| Cluster707;si Proteobac Alphap Rhod Acetobacteraceae      | 0 | 0 | 0 | 1 | 0 | 0 | 0 | 0 | 0 | 0 | 0 | 0 | 1 |
| Cluster708;size=6                                         | 0 | 0 | 0 | 1 | 0 | 0 | 0 | 0 | 0 | 0 | 0 | 0 | 1 |
| Cluster709;si Actinobac Actinol Actin Nocardiaceae        | 0 | 0 | 0 | 0 | 0 | 0 | 0 | 0 | 0 | 0 | 0 | 0 | 1 |
| Cluster734;si Proteobac Gamm Xantl Sinobac Steroidobacter | 0 | 0 | 1 | 0 | 0 | 0 | 0 | 0 | 0 | 0 | 0 | 0 | 1 |
| Cluster739;si Acidobact Acidobacteria_Gp1 Gp1             | 0 | 0 | 0 | 1 | 0 | 0 | 0 | 0 | 0 | 0 | 0 | 0 | 1 |
| Cluster745;si Acidobacteria                               | 0 | 0 | 1 | 0 | 0 | 0 | 0 | 0 | 0 | 0 | 0 | 0 | 1 |
| Cluster748;si Acidobact Acidobacteria_Gp1 Gp1             | 0 | 0 | 0 | 0 | 0 | 0 | 1 | 0 | 0 | 0 | 0 | 0 | 1 |
| Cluster756;si Acidobact Acidobacteria_Gp2 Gp2             | 0 | 0 | 0 | 0 | 0 | 0 | 1 | 0 | 0 | 0 | 0 | 0 | 1 |
| Cluster768;si Bacteroid Sphing Sphir Chitinophagaceae     | 0 | 0 | 0 | 0 | 0 | 0 | 0 | 1 | 0 | 0 | 0 | 0 | 1 |
| Cluster770;si Acidobact Acidobacteria_Gp2 Gp2             | 0 | 0 | 0 | 1 | 0 | 0 | 0 | 0 | 0 | 0 | 0 | 0 | 1 |
| Cluster778;si Acidobact Acidobacteria_Gp2 Gp2             | 0 | 0 | 0 | 0 | 0 | 0 | 0 | 0 | 1 | 0 | 0 | 0 | 1 |
| Cluster783;si Acidobact Acidobacteria_Gp2 Gp2             | 1 | 0 | 0 | 0 | 0 | 0 | 0 | 0 | 0 | 0 | 0 | 0 | 1 |
| Cluster784;si Acidobact Acidobacteria_Gp1 Gp1             | 0 | 0 | 0 | 0 | 0 | 0 | 0 | 0 | 0 | 1 | 0 | 0 | 1 |
| Cluster787;si Acidobact Acidobacteria_Gp1 Granulicella    | 0 | 0 | 1 | 0 | 0 | 0 | 0 | 0 | 0 | 0 | 0 | 0 | 1 |
| Cluster789;size=8                                         | 0 | 0 | 0 | 0 | 0 | 0 | 0 | 0 | 0 | 0 | 1 | 0 | 1 |
| Cluster793;si Acidobact Acidobacteria_Gp1 Gp1             | 0 | 0 | 0 | 0 | 1 | 0 | 0 | 0 | 0 | 0 | 0 | 0 | 1 |
| Cluster800;size=2                                         | 0 | 0 | 1 | 0 | 0 | 0 | 0 | 0 | 0 | 0 | 0 | 0 | 1 |
| Cluster803;si Acidobact Acidobacteria_Gp1 Gp1             | 0 | 0 | 0 | 0 | 0 | 1 | 0 | 0 | 0 | 0 | 0 | 0 | 1 |
| Cluster808;si Acidobact Acidobacteria_Gp3 Gp3             | 0 | 0 | 0 | 0 | 0 | 1 | 0 | 0 | 0 | 0 | 0 | 0 | 1 |
| Cluster811;size=2                                         | 0 | 0 | 1 | 0 | 0 | 0 | 0 | 0 | 0 | 0 | 0 | 0 | 1 |
| Cluster814;si Proteobac Alphap Rhod Acetobacteraceae      | 0 | 0 | 0 | 0 | 0 | 0 | 0 | 0 | 0 | 1 | 0 | 0 | 1 |
| Cluster820;si Proteobac Alphap Caulc Caulobacteraceae     | 0 | 0 | 0 | 1 | 0 | 0 | 0 | 0 | 0 | 0 | 0 | 0 | 1 |
| Cluster821;si Proteobacteria                              | 1 | 0 | 0 | 0 | 0 | 0 | 0 | 0 | 0 | 0 | 0 | 0 | 1 |
| Cluster822;si Proteobac Alphap Rhodospirillales           | 0 | 0 | 0 | 0 | 0 | 0 | 0 | 1 | 0 | 0 | 0 | 0 | 1 |
| Cluster823;si Acidobact Acidobacteria_Gp7 Gp7             | 0 | 0 | 0 | 0 | 1 | 0 | 0 | 0 | 0 | 0 | 0 | 0 | 1 |
| Cluster830;si Proteobac Alphap Rhod Acetobacteraceae      | 0 | 0 | 1 | 0 | 0 | 0 | 0 | 0 | 0 | 0 | 0 | 0 | 1 |
| Cluster831;si Proteobac Deltap Myxc Polyangiaceae         | 0 | 0 | 0 | 0 | 0 | 1 | 0 | 0 | 0 | 0 | 0 | 0 | 1 |





|                                                            |   |   |   |   |   |   |   |   |   |   |   |   |   |
|------------------------------------------------------------|---|---|---|---|---|---|---|---|---|---|---|---|---|
| Cluster957;si Proteobac Gamm Xantl Sinobac Steroidobacter  | 0 | 0 | 0 | 0 | 0 | 0 | 0 | 0 | 0 | 1 | 0 | 0 | 1 |
| Cluster968;si Proteobac Betapr Burkl Burkhol Burkholderia  | 0 | 0 | 0 | 0 | 0 | 0 | 0 | 0 | 0 | 0 | 1 | 0 | 1 |
| Cluster972;si Proteobac Betapr Burkl Burkhol Burkholderia  | 0 | 0 | 0 | 0 | 0 | 0 | 0 | 1 | 0 | 0 | 0 | 0 | 1 |
| Cluster973;si Proteobac Deltaproteobacteria                | 0 | 0 | 1 | 0 | 0 | 0 | 0 | 0 | 0 | 0 | 0 | 0 | 1 |
| Cluster977;si Proteobac Gammaproteobacteria                | 0 | 0 | 0 | 0 | 0 | 0 | 0 | 0 | 0 | 1 | 0 | 0 | 1 |
| Cluster986;si Bacteroid Sphing Sphir Chitinophagaceae      | 0 | 0 | 0 | 0 | 0 | 1 | 0 | 0 | 0 | 0 | 0 | 0 | 1 |
| Cluster987;si Acidobact Acidobacteria_Gp1 Granulicella     | 0 | 0 | 1 | 0 | 0 | 0 | 0 | 0 | 0 | 0 | 0 | 0 | 1 |
| Cluster993;si Proteobac Alphap Rhizobiales                 | 0 | 0 | 0 | 0 | 0 | 0 | 1 | 0 | 0 | 0 | 0 | 0 | 1 |
| Cluster1008; Proteobac Alphaproteobacteria                 | 0 | 0 | 0 | 0 | 0 | 0 | 0 | 0 | 0 | 1 | 0 | 0 | 1 |
| Cluster1014; Proteobac Deltaproteobacteria                 | 0 | 1 | 0 | 0 | 0 | 0 | 0 | 0 | 0 | 0 | 0 | 0 | 1 |
| Cluster1023; Proteobac Alphap Rhodospirillales             | 0 | 0 | 0 | 1 | 0 | 0 | 0 | 0 | 0 | 0 | 0 | 0 | 1 |
| Cluster1024; Proteobac Alphap Rhod Acetob; Acidocella      | 0 | 0 | 0 | 0 | 0 | 0 | 0 | 0 | 0 | 0 | 0 | 1 | 1 |
| Cluster1026;size=4                                         | 0 | 0 | 1 | 0 | 0 | 0 | 0 | 0 | 0 | 0 | 0 | 0 | 1 |
| Cluster1043; Acidobact Acidobacteria_Gp1                   | 0 | 0 | 0 | 0 | 0 | 0 | 1 | 0 | 0 | 0 | 0 | 0 | 1 |
| Cluster1044; Proteobac Alphap Rhizc Bradyrh Agromonas      | 0 | 0 | 0 | 0 | 0 | 0 | 0 | 0 | 0 | 1 | 0 | 0 | 1 |
| Cluster1049; Proteobac Gammaproteobacteria                 | 0 | 0 | 0 | 0 | 0 | 0 | 0 | 1 | 0 | 0 | 0 | 0 | 1 |
| Cluster1054; Proteobac Alphap Rhizobiales                  | 1 | 0 | 0 | 0 | 0 | 0 | 0 | 0 | 0 | 0 | 0 | 0 | 1 |
| Cluster1055; Bacteroid Sphing Sphir Sphingo Mucilaginibact | 1 | 0 | 0 | 0 | 0 | 0 | 0 | 0 | 0 | 0 | 0 | 0 | 1 |
| Cluster1056; Chlamydi; Chlamy; Chlamydiales                | 0 | 0 | 1 | 0 | 0 | 0 | 0 | 0 | 0 | 0 | 0 | 0 | 1 |
| Cluster1060; Acidobact Acidobacteria_Gp2 Gp2               | 0 | 0 | 0 | 0 | 0 | 0 | 1 | 0 | 0 | 0 | 0 | 0 | 1 |
| Cluster1061; Proteobac Alphap Rhodospirillales             | 1 | 0 | 0 | 0 | 0 | 0 | 0 | 0 | 0 | 0 | 0 | 0 | 1 |
| Cluster1064; Verrucom Opiritae                             | 0 | 0 | 0 | 0 | 0 | 0 | 0 | 0 | 0 | 1 | 0 | 0 | 1 |
| Cluster1067; Proteobac Gammaproteobacteria                 | 1 | 0 | 0 | 0 | 0 | 0 | 0 | 0 | 0 | 0 | 0 | 0 | 1 |
| Cluster1088; Bacteroid Flavob. Flavo Flavobacteriaceae     | 0 | 0 | 0 | 0 | 0 | 0 | 0 | 0 | 0 | 1 | 0 | 0 | 1 |
| Cluster1089;size=2                                         | 0 | 0 | 0 | 1 | 0 | 0 | 0 | 0 | 0 | 0 | 0 | 0 | 1 |
| Cluster1099; Acidobact Acidobacteria_Gp1 Gp1               | 0 | 0 | 0 | 0 | 0 | 0 | 0 | 1 | 0 | 0 | 0 | 0 | 1 |
| Cluster1101; Acidobact Acidobacteria_Gp3                   | 0 | 0 | 0 | 0 | 0 | 0 | 0 | 0 | 0 | 0 | 0 | 1 | 1 |
| Cluster1106; Proteobac Deltap Myxococcales                 | 1 | 0 | 0 | 0 | 0 | 0 | 0 | 0 | 0 | 0 | 0 | 0 | 1 |
| Cluster1111; Acidobact Acidobacteria_Gp2 Gp2               | 0 | 0 | 0 | 0 | 0 | 0 | 0 | 1 | 0 | 0 | 0 | 0 | 1 |

|                                                          |   |   |   |   |   |   |   |   |   |   |   |   |   |
|----------------------------------------------------------|---|---|---|---|---|---|---|---|---|---|---|---|---|
| Cluster1112; Proteobac Gammaproteobacteria               | 0 | 0 | 0 | 0 | 0 | 0 | 0 | 0 | 1 | 0 | 0 | 0 | 1 |
| Cluster1114; Proteobac Deltap Myxococcales               | 0 | 0 | 0 | 0 | 0 | 0 | 0 | 0 | 0 | 1 | 0 | 0 | 1 |
| Cluster1118; Armatimonadetes Armatimonade                | 0 | 0 | 0 | 0 | 1 | 0 | 0 | 0 | 0 | 0 | 0 | 0 | 1 |
| Cluster1123; Acidobact Acidobacteria_Gp1                 | 0 | 0 | 0 | 0 | 0 | 0 | 0 | 0 | 0 | 0 | 1 | 0 | 1 |
| Cluster1141; Armatimc Armati Arma Armatin Armatimonas/   | 1 | 0 | 0 | 0 | 0 | 0 | 0 | 0 | 0 | 0 | 0 | 0 | 1 |
| Cluster1153; Proteobac Alphaproteobacteria               | 0 | 0 | 1 | 0 | 0 | 0 | 0 | 0 | 0 | 0 | 0 | 0 | 1 |
| Cluster1154; Proteobacteria                              | 1 | 0 | 0 | 0 | 0 | 0 | 0 | 0 | 0 | 0 | 0 | 0 | 1 |
| Cluster1162; Acidobact Acidobacteria_Gp2 Gp2             | 0 | 0 | 0 | 0 | 0 | 0 | 0 | 0 | 0 | 0 | 1 | 0 | 1 |
| Cluster1163; Proteobac Gammaproteobacteria               | 1 | 0 | 0 | 0 | 0 | 0 | 0 | 0 | 0 | 0 | 0 | 0 | 1 |
| Cluster1166;size=8                                       | 0 | 0 | 0 | 0 | 0 | 0 | 0 | 0 | 0 | 0 | 0 | 1 | 1 |
| Cluster1167; Proteobac Alphap Sphir Sphingo Novosphingob | 0 | 0 | 0 | 0 | 0 | 1 | 0 | 0 | 0 | 0 | 0 | 0 | 1 |
| Cluster1168; Proteobac Deltaproteobacteria               | 0 | 1 | 0 | 0 | 0 | 0 | 0 | 0 | 0 | 0 | 0 | 0 | 1 |
| Cluster1169;size=3                                       | 1 | 0 | 0 | 0 | 0 | 0 | 0 | 0 | 0 | 0 | 0 | 0 | 1 |
| Cluster1176; Proteobac Betaproteobacteria                | 0 | 0 | 0 | 1 | 0 | 0 | 0 | 0 | 0 | 0 | 0 | 0 | 1 |
| Cluster1177; Acidobact Acidobacteria_Gp3 Gp3             | 0 | 0 | 0 | 0 | 0 | 1 | 0 | 0 | 0 | 0 | 0 | 0 | 1 |
| Cluster1184; Acidobact Acidobacteria_Gp2 Gp2             | 1 | 0 | 0 | 0 | 0 | 0 | 0 | 0 | 0 | 0 | 0 | 0 | 1 |
| Cluster1185; Acidobact Acidobacteria_Gp3                 | 0 | 0 | 0 | 0 | 0 | 0 | 0 | 1 | 0 | 0 | 0 | 0 | 1 |
| Cluster1186; Proteobac Gammaproteobacteria               | 0 | 0 | 1 | 0 | 0 | 0 | 0 | 0 | 0 | 0 | 0 | 0 | 1 |
| Cluster1187; Acidobact Acidobacteria_Gp1                 | 0 | 0 | 0 | 0 | 0 | 0 | 0 | 1 | 0 | 0 | 0 | 0 | 1 |
| Cluster1192; Acidobact Acidobacteria_Gp2 Gp2             | 0 | 0 | 0 | 0 | 1 | 0 | 0 | 0 | 0 | 0 | 0 | 0 | 1 |
| Cluster1196; Acidobact Acidobacteria_Gp1 Gp1             | 0 | 0 | 0 | 1 | 0 | 0 | 0 | 0 | 0 | 0 | 0 | 0 | 1 |
| Cluster1200; Chloroflex Ktedor Ktedonobacterales         | 0 | 0 | 0 | 0 | 0 | 0 | 0 | 0 | 0 | 0 | 1 | 0 | 1 |
| Cluster1202; Bacteroid Sphing Sphir Chitinophagaceae     | 0 | 0 | 0 | 0 | 0 | 0 | 1 | 0 | 0 | 0 | 0 | 0 | 1 |
| Cluster1203; Acidobact Acidobacteria_Gp6 Gp6             | 0 | 0 | 0 | 0 | 1 | 0 | 0 | 0 | 0 | 0 | 0 | 0 | 1 |
| Cluster1204; Acidobact Acidobacteria_Gp1 Gp1             | 0 | 0 | 0 | 0 | 0 | 0 | 0 | 0 | 0 | 1 | 0 | 0 | 1 |
| Cluster1205;size=1                                       | 0 | 0 | 0 | 1 | 0 | 0 | 0 | 0 | 0 | 0 | 0 | 0 | 1 |
| Cluster1211; Proteobac Alphap Rhizc Beijerinckiaceae     | 0 | 0 | 1 | 0 | 0 | 0 | 0 | 0 | 0 | 0 | 0 | 0 | 1 |
| Cluster1213; Acidobact Acidobacteria_Gp3                 | 1 | 0 | 0 | 0 | 0 | 0 | 0 | 0 | 0 | 0 | 0 | 0 | 1 |
| Cluster1215; Proteobac Gammaproteobacteria               | 0 | 0 | 0 | 0 | 0 | 0 | 0 | 1 | 0 | 0 | 0 | 0 | 1 |

|                                                       |   |   |   |   |   |   |   |   |   |   |   |   |   |
|-------------------------------------------------------|---|---|---|---|---|---|---|---|---|---|---|---|---|
| Cluster1220; Acidobact Acidobacteria_Gp2 Gp2          | 0 | 0 | 0 | 0 | 0 | 0 | 1 | 0 | 0 | 0 | 0 | 0 | 1 |
| Cluster1221; Verrucom Subdivision3 Subdivision3_ε     | 1 | 0 | 0 | 0 | 0 | 0 | 0 | 0 | 0 | 0 | 0 | 0 | 1 |
| Cluster1228; Proteobac Deltaproteobacteria            | 0 | 0 | 0 | 0 | 0 | 0 | 0 | 0 | 1 | 0 | 0 | 0 | 1 |
| Cluster1231; Proteobac Gammaproteobacteria            | 0 | 0 | 0 | 1 | 0 | 0 | 0 | 0 | 0 | 0 | 0 | 0 | 1 |
| Cluster1233; Acidobact Acidobacteria_Gp3 Gp3          | 0 | 0 | 0 | 0 | 1 | 0 | 0 | 0 | 0 | 0 | 0 | 0 | 1 |
| Cluster1243; Chlorobi Ignavik Ignav Ignavibacteriu    | 0 | 0 | 0 | 0 | 0 | 0 | 0 | 0 | 0 | 1 | 0 | 0 | 1 |
| Cluster1250; Verrucom Opitut; Opitu Opituta Opitutus  | 0 | 0 | 0 | 0 | 0 | 1 | 0 | 0 | 0 | 0 | 0 | 0 | 1 |
| Cluster1251; Proteobac Gamm Legio Legione Legionella  | 1 | 0 | 0 | 0 | 0 | 0 | 0 | 0 | 0 | 0 | 0 | 0 | 1 |
| Cluster1255; Actinobac Actinol Actinomycetales        | 0 | 0 | 0 | 0 | 0 | 0 | 0 | 0 | 0 | 1 | 0 | 0 | 1 |
| Cluster1260; Actinobac Actinol Actin Nocardiaceae     | 0 | 0 | 0 | 0 | 0 | 0 | 0 | 0 | 0 | 0 | 1 | 0 | 1 |
| Cluster1262; size=7                                   | 0 | 0 | 0 | 0 | 0 | 1 | 0 | 0 | 0 | 0 | 0 | 0 | 1 |
| Cluster1276; size=2                                   | 0 | 0 | 0 | 0 | 1 | 0 | 0 | 0 | 0 | 0 | 0 | 0 | 1 |
| Cluster1284; Proteobac Alphap Rhod Acetobacteraceae   | 1 | 0 | 0 | 0 | 0 | 0 | 0 | 0 | 0 | 0 | 0 | 0 | 1 |
| Cluster1291; Proteobac Alphap Rhizc Bradyrhizobiaceae | 0 | 0 | 0 | 0 | 0 | 0 | 0 | 0 | 0 | 1 | 0 | 0 | 1 |
| Cluster1306; Acidobact Acidobacteria_Gp1              | 0 | 0 | 0 | 0 | 0 | 0 | 0 | 0 | 0 | 1 | 0 | 0 | 1 |
| Cluster1309; Acidobact Acidobacteria_Gp2 Gp2          | 0 | 0 | 0 | 1 | 0 | 0 | 0 | 0 | 0 | 0 | 0 | 0 | 1 |
| Cluster1312; Acidobact Acidobacteria_Gp2 Gp2          | 0 | 0 | 0 | 0 | 0 | 0 | 0 | 0 | 1 | 0 | 0 | 0 | 1 |
| Cluster1318; Proteobac Alphap Rhodospirillales        | 0 | 0 | 0 | 0 | 0 | 0 | 1 | 0 | 0 | 0 | 0 | 0 | 1 |
| Cluster1322; Acidobact Acidobacteria_Gp2 Gp2          | 1 | 0 | 0 | 0 | 0 | 0 | 0 | 0 | 0 | 0 | 0 | 0 | 1 |
| Cluster1323; Gemmatir Gemm Gemı Gemma Gemmatimona     | 0 | 0 | 0 | 0 | 0 | 0 | 1 | 0 | 0 | 0 | 0 | 0 | 1 |
| Cluster1339; Acidobact Acidobacteria_Gp3 Bryobacter   | 0 | 0 | 0 | 0 | 0 | 0 | 0 | 0 | 0 | 0 | 0 | 1 | 1 |
| Cluster1341; Proteobac Alphap Caulc Caulobacteraceae  | 0 | 0 | 0 | 0 | 0 | 0 | 0 | 1 | 0 | 0 | 0 | 0 | 1 |
| Cluster1346; Proteobac Betapr Burkholderiales         | 1 | 0 | 0 | 0 | 0 | 0 | 0 | 0 | 0 | 0 | 0 | 0 | 1 |
| Cluster1347; Proteobac Alphaproteobacteria            | 0 | 0 | 0 | 0 | 0 | 0 | 0 | 0 | 0 | 1 | 0 | 0 | 1 |
| Cluster1348; Acidobact Acidobacteria_Gp3 Gp3          | 1 | 0 | 0 | 0 | 0 | 0 | 0 | 0 | 0 | 0 | 0 | 0 | 1 |
| Cluster1349; Proteobac Deltaproteobacteria            | 0 | 0 | 1 | 0 | 0 | 0 | 0 | 0 | 0 | 0 | 0 | 0 | 1 |
| Cluster1360; Proteobac Alphaproteobacteria            | 0 | 0 | 0 | 0 | 0 | 0 | 0 | 1 | 0 | 0 | 0 | 0 | 1 |
| Cluster1362; Actinobac Actinol Actinomycetales        | 0 | 0 | 1 | 0 | 0 | 0 | 0 | 0 | 0 | 0 | 0 | 0 | 1 |
| Cluster1367; Proteobac Alphap Rhizobiales             | 0 | 0 | 0 | 0 | 0 | 0 | 1 | 0 | 0 | 0 | 0 | 0 | 1 |

|                                                        |   |   |   |   |   |   |   |   |   |   |   |   |   |
|--------------------------------------------------------|---|---|---|---|---|---|---|---|---|---|---|---|---|
| Cluster1368; Chlamydi; Chlamy; Chlamydiales            | 1 | 0 | 0 | 0 | 0 | 0 | 0 | 0 | 0 | 0 | 0 | 0 | 1 |
| Cluster1370; Acidobact Acidobacteria_Gp2 Gp2           | 0 | 0 | 0 | 0 | 0 | 1 | 0 | 0 | 0 | 0 | 0 | 0 | 1 |
| Cluster1375; Acidobact Acidobacteria_Gp3 Gp3           | 0 | 0 | 0 | 0 | 0 | 0 | 1 | 0 | 0 | 0 | 0 | 0 | 1 |
| Cluster1376;size=3                                     | 0 | 0 | 0 | 0 | 0 | 0 | 0 | 0 | 0 | 0 | 1 | 0 | 1 |
| Cluster1378;size=12                                    | 0 | 0 | 0 | 1 | 0 | 0 | 0 | 0 | 0 | 0 | 0 | 0 | 1 |
| Cluster1380; Acidobact Acidobacteria_Gp2 Gp2           | 0 | 0 | 0 | 0 | 0 | 0 | 0 | 0 | 1 | 0 | 0 | 0 | 1 |
| Cluster1383; Acidobact Acidobacteria_Gp1 Gp1           | 0 | 0 | 0 | 0 | 0 | 1 | 0 | 0 | 0 | 0 | 0 | 0 | 1 |
| Cluster1389; Proteobac Betapr Burkholderiales          | 1 | 0 | 0 | 0 | 0 | 0 | 0 | 0 | 0 | 0 | 0 | 0 | 1 |
| Cluster1390; Acidobact Acidobacteria_Gp2 Gp2           | 0 | 0 | 0 | 0 | 0 | 0 | 0 | 0 | 0 | 0 | 1 | 0 | 1 |
| Cluster1397; Acidobact Acidobacteria_Gp2 Gp2           | 0 | 0 | 0 | 0 | 0 | 0 | 0 | 1 | 0 | 0 | 0 | 0 | 1 |
| Cluster1399;size=13                                    | 0 | 0 | 0 | 0 | 0 | 0 | 0 | 1 | 0 | 0 | 0 | 0 | 1 |
| Cluster1400; Proteobac Alphap Rhizobiales              | 0 | 0 | 0 | 0 | 0 | 1 | 0 | 0 | 0 | 0 | 0 | 0 | 1 |
| Cluster1402; Acidobact Acidobacteria_Gp1               | 0 | 0 | 0 | 0 | 0 | 0 | 0 | 0 | 0 | 0 | 1 | 0 | 1 |
| Cluster1407; Acidobact Acidobacteria_Gp1 Gp1           | 0 | 0 | 0 | 1 | 0 | 0 | 0 | 0 | 0 | 0 | 0 | 0 | 1 |
| Cluster1410; Proteobac Gamm Xantl Xanthomonadaceae     | 1 | 0 | 0 | 0 | 0 | 0 | 0 | 0 | 0 | 0 | 0 | 0 | 1 |
| Cluster1412; Proteobac Alphaproteobacteria             | 1 | 0 | 0 | 0 | 0 | 0 | 0 | 0 | 0 | 0 | 0 | 0 | 1 |
| Cluster1413;size=1                                     | 0 | 0 | 0 | 0 | 0 | 0 | 0 | 0 | 0 | 1 | 0 | 0 | 1 |
| Cluster1414; Acidobact Acidobacteria_Gp2 Gp2           | 0 | 0 | 0 | 0 | 0 | 0 | 0 | 0 | 0 | 0 | 0 | 1 | 1 |
| Cluster1416; Acidobact Acidobacteria_Gp1               | 0 | 0 | 0 | 0 | 0 | 0 | 0 | 0 | 0 | 0 | 1 | 0 | 1 |
| Cluster1417; Proteobac Alphap Rhod Acetobacteraceae    | 0 | 0 | 0 | 0 | 0 | 0 | 0 | 0 | 0 | 1 | 0 | 0 | 1 |
| Cluster1424; Proteobac Deltaproteobacteria             | 0 | 0 | 0 | 0 | 0 | 0 | 1 | 0 | 0 | 0 | 0 | 0 | 1 |
| Cluster1427; Armatimc Armati Arma Armatin Armatimonas/ | 0 | 0 | 0 | 0 | 0 | 0 | 0 | 0 | 1 | 0 | 0 | 0 | 1 |
| Cluster1430; Acidobact Acidobacteria_Gp2 Gp2           | 0 | 0 | 0 | 1 | 0 | 0 | 0 | 0 | 0 | 0 | 0 | 0 | 1 |
| Cluster1433; Proteobac Gamm Legio Coxiella Aquicella   | 0 | 0 | 0 | 0 | 0 | 0 | 0 | 0 | 0 | 1 | 0 | 0 | 1 |
| Cluster1434; Proteobac Gamm Pseu Pseud Pseudomonas     | 0 | 0 | 0 | 0 | 0 | 0 | 0 | 0 | 0 | 0 | 0 | 1 | 1 |
| Cluster1436; Proteobac Alphap Rhizobiales              | 0 | 0 | 0 | 0 | 0 | 0 | 1 | 0 | 0 | 0 | 0 | 0 | 1 |
| Cluster1441; Proteobac Alphap Rhizobiales              | 0 | 0 | 0 | 0 | 0 | 0 | 0 | 0 | 0 | 0 | 1 | 0 | 1 |
| Cluster1448; Acidobact Acidobacteria_Gp2 Gp2           | 1 | 0 | 0 | 0 | 0 | 0 | 0 | 0 | 0 | 0 | 0 | 0 | 1 |
| Cluster1450; Proteobac Alphap Rhizc Rhizobiaceae       | 0 | 0 | 0 | 0 | 0 | 1 | 0 | 0 | 0 | 0 | 0 | 0 | 1 |





|                                                             |   |   |   |   |   |   |   |   |   |   |   |   |   |
|-------------------------------------------------------------|---|---|---|---|---|---|---|---|---|---|---|---|---|
| Cluster1688; Acidobact Acidobacteria_Gp2 Gp2                | 0 | 0 | 0 | 0 | 0 | 0 | 1 | 0 | 0 | 0 | 0 | 0 | 1 |
| Cluster1689; Proteobac Gammaproteobacteria                  | 0 | 1 | 0 | 0 | 0 | 0 | 0 | 0 | 0 | 0 | 0 | 0 | 1 |
| Cluster1691; Acidobacteria                                  | 0 | 0 | 0 | 0 | 0 | 1 | 0 | 0 | 0 | 0 | 0 | 0 | 1 |
| Cluster1696; Acidobact Acidobacteria_Gp1                    | 0 | 0 | 1 | 0 | 0 | 0 | 0 | 0 | 0 | 0 | 0 | 0 | 1 |
| Cluster1699; Acidobact Acidobacteria_Gp2 Gp2                | 0 | 0 | 0 | 0 | 0 | 0 | 0 | 0 | 0 | 0 | 1 | 0 | 1 |
| Cluster1700; Bacteroid Sphing Sphir Sphingo Mucilaginibact  | 0 | 0 | 0 | 0 | 0 | 0 | 0 | 0 | 0 | 1 | 0 | 0 | 1 |
| Cluster1708; Acidobact Acidobacteria_Gp13 Gp13              | 1 | 0 | 0 | 0 | 0 | 0 | 0 | 0 | 0 | 0 | 0 | 0 | 1 |
| Cluster1712; Proteobac Gammaproteobacteria                  | 0 | 0 | 0 | 1 | 0 | 0 | 0 | 0 | 0 | 0 | 0 | 0 | 1 |
| Cluster1713; Acidobact Acidobacteria_Gp1                    | 0 | 0 | 0 | 0 | 0 | 0 | 0 | 0 | 0 | 1 | 0 | 0 | 1 |
| Cluster1719; Actinobac Actinobacteria                       | 0 | 0 | 0 | 0 | 0 | 0 | 0 | 0 | 0 | 1 | 0 | 0 | 1 |
| Cluster1720; Actinobac Actinol Actinomycetales              | 0 | 0 | 0 | 0 | 0 | 1 | 0 | 0 | 0 | 0 | 0 | 0 | 1 |
| Cluster1722; size=1                                         | 0 | 0 | 1 | 0 | 0 | 0 | 0 | 0 | 0 | 0 | 0 | 0 | 1 |
| Cluster1729; Proteobac Gamm Legio Coxiella Aquicella        | 0 | 0 | 0 | 0 | 0 | 0 | 0 | 0 | 0 | 0 | 0 | 1 | 1 |
| Cluster1742; Proteobac Betaproteobacteria                   | 0 | 0 | 0 | 0 | 0 | 0 | 0 | 0 | 0 | 0 | 0 | 1 | 1 |
| Cluster1746; Acidobacteria                                  | 0 | 0 | 0 | 0 | 0 | 0 | 0 | 0 | 0 | 0 | 1 | 0 | 1 |
| Cluster1747; Proteobac Alphap Caulc Caulobacteraceae        | 0 | 0 | 0 | 0 | 1 | 0 | 0 | 0 | 0 | 0 | 0 | 0 | 1 |
| Cluster1748; Proteobac Alphap Rhizc Hyphon Rhodoplanes      | 0 | 0 | 0 | 0 | 0 | 0 | 0 | 1 | 0 | 0 | 0 | 0 | 1 |
| Cluster1749; Proteobac Alphap Caulc Caulobac Phenyllobacter | 0 | 0 | 0 | 1 | 0 | 0 | 0 | 0 | 0 | 0 | 0 | 0 | 1 |
| Cluster1750; Proteobac Betapr Burkl Burkholderiaceae        | 0 | 0 | 1 | 0 | 0 | 0 | 0 | 0 | 0 | 0 | 0 | 0 | 1 |
| Cluster1755; OD1 OD1_genera_i                               | 0 | 1 | 0 | 0 | 0 | 0 | 0 | 0 | 0 | 0 | 0 | 0 | 1 |
| Cluster1758; Actinobac Actinol Actinomycetales              | 0 | 0 | 0 | 0 | 0 | 0 | 0 | 0 | 0 | 1 | 0 | 0 | 1 |
| Cluster1760; Acidobact Acidobacteria_Gp1 Gp1                | 0 | 0 | 1 | 0 | 0 | 0 | 0 | 0 | 0 | 0 | 0 | 0 | 1 |
| Cluster1765; Acidobact Acidobacteria_Gp3                    | 0 | 0 | 0 | 0 | 0 | 0 | 0 | 0 | 0 | 1 | 0 | 0 | 1 |
| Cluster1769; Actinobac Actinol Acidimicrobiales             | 0 | 1 | 0 | 0 | 0 | 0 | 0 | 0 | 0 | 0 | 0 | 0 | 1 |
| Cluster1770; Proteobac Deltaproteobacteria                  | 0 | 0 | 1 | 0 | 0 | 0 | 0 | 0 | 0 | 0 | 0 | 0 | 1 |
| Cluster1772; Proteobac Gammaproteobacteria                  | 0 | 0 | 0 | 1 | 0 | 0 | 0 | 0 | 0 | 0 | 0 | 0 | 1 |
| Cluster1775; size=3                                         | 0 | 0 | 0 | 0 | 0 | 0 | 0 | 0 | 0 | 0 | 0 | 1 | 1 |
| Cluster1776; size=4                                         | 0 | 0 | 0 | 0 | 0 | 0 | 0 | 0 | 0 | 0 | 1 | 0 | 1 |
| Cluster1779; Proteobac Alphap Rhod Acetobac Acidisphaera    | 0 | 0 | 0 | 0 | 0 | 0 | 0 | 0 | 0 | 0 | 1 | 0 | 1 |



|                                                          |   |   |   |   |   |   |   |   |   |   |   |   |   |
|----------------------------------------------------------|---|---|---|---|---|---|---|---|---|---|---|---|---|
| Cluster1781;size=5                                       | 0 | 0 | 0 | 0 | 0 | 0 | 0 | 0 | 0 | 1 | 0 | 0 | 1 |
| Cluster1785;size=3                                       | 0 | 0 | 1 | 0 | 0 | 0 | 0 | 0 | 0 | 0 | 0 | 0 | 1 |
| Cluster1786; Acidobact Acidobacteria_Gp3 Gp3             | 0 | 0 | 0 | 0 | 0 | 0 | 0 | 0 | 0 | 1 | 0 | 0 | 1 |
| Cluster1792; Acidobact Acidobacteria_Gp2 Gp2             | 0 | 0 | 0 | 0 | 0 | 0 | 1 | 0 | 0 | 0 | 0 | 0 | 1 |
| Cluster1797; Acidobact Acidobacteria_Gp1 Gp1             | 0 | 0 | 0 | 0 | 0 | 0 | 1 | 0 | 0 | 0 | 0 | 0 | 1 |
| Cluster1798; Proteobac Alphap Rhodospirillales           | 0 | 0 | 0 | 0 | 0 | 0 | 0 | 0 | 0 | 0 | 1 | 0 | 1 |
| Cluster1808; Proteobac Gammaproteobacteria               | 0 | 0 | 0 | 1 | 0 | 0 | 0 | 0 | 0 | 0 | 0 | 0 | 1 |
| Cluster1809; Chlamydi Chlamy Chlar Parachlamydiaceae     | 0 | 1 | 0 | 0 | 0 | 0 | 0 | 0 | 0 | 0 | 0 | 0 | 1 |
| Cluster1812; Proteobac Gamm Legio Coxiella Coxiella      | 0 | 0 | 0 | 0 | 0 | 0 | 1 | 0 | 0 | 0 | 0 | 0 | 1 |
| Cluster1822; Proteobac Betaproteobacteria                | 0 | 0 | 0 | 0 | 0 | 0 | 0 | 0 | 1 | 0 | 0 | 0 | 1 |
| Cluster1825; Proteobac Alphap Rhizobiales                | 1 | 0 | 0 | 0 | 0 | 0 | 0 | 0 | 0 | 0 | 0 | 0 | 1 |
| Cluster1831; Acidobacteria                               | 0 | 0 | 0 | 0 | 0 | 0 | 0 | 1 | 0 | 0 | 0 | 0 | 1 |
| Cluster1837; Proteobac Alphap Rhizc Xanthol Labrys       | 0 | 1 | 0 | 0 | 0 | 0 | 0 | 0 | 0 | 0 | 0 | 0 | 1 |
| Cluster1839;size=1                                       | 1 | 0 | 0 | 0 | 0 | 0 | 0 | 0 | 0 | 0 | 0 | 0 | 1 |
| Cluster1843; Firmicute: Bacilli Bacill Bacillac Bacillus | 0 | 0 | 0 | 0 | 0 | 0 | 0 | 0 | 0 | 1 | 0 | 0 | 1 |
| Cluster1845;size=4                                       | 0 | 0 | 0 | 0 | 0 | 0 | 0 | 0 | 1 | 0 | 0 | 0 | 1 |
| Cluster1859; Acidobact Acidobacteria_Gp1                 | 0 | 0 | 1 | 0 | 0 | 0 | 0 | 0 | 0 | 0 | 0 | 0 | 1 |
| Cluster1861; Acidobact Acidobacteria_Gp2 Gp2             | 0 | 0 | 0 | 0 | 0 | 0 | 0 | 0 | 0 | 0 | 1 | 0 | 1 |
| Cluster1863;size=13                                      | 0 | 0 | 0 | 0 | 0 | 0 | 0 | 0 | 0 | 0 | 0 | 1 | 1 |
| Cluster1875; Chlamydi: Chlamy Chlar Parachlamydiaceae    | 0 | 1 | 0 | 0 | 0 | 0 | 0 | 0 | 0 | 0 | 0 | 0 | 1 |
| Cluster1877; Acidobact Acidobacteria_Gp1                 | 0 | 0 | 0 | 0 | 1 | 0 | 0 | 0 | 0 | 0 | 0 | 0 | 1 |
| Cluster1878; Proteobac Deltaproteobacteria               | 0 | 0 | 0 | 0 | 1 | 0 | 0 | 0 | 0 | 0 | 0 | 0 | 1 |
| Cluster1882;size=2                                       | 0 | 0 | 0 | 1 | 0 | 0 | 0 | 0 | 0 | 0 | 0 | 0 | 1 |
| Cluster1885;size=5                                       | 0 | 0 | 0 | 0 | 0 | 0 | 0 | 0 | 0 | 0 | 1 | 0 | 1 |
| Cluster1887; Acidobact Acidobacteria_Gp10 Gp10           | 0 | 1 | 0 | 0 | 0 | 0 | 0 | 0 | 0 | 0 | 0 | 0 | 1 |
| Cluster1892; Proteobac Alphap Alphaproteot Rhizomicrobiu | 0 | 0 | 0 | 0 | 0 | 0 | 1 | 0 | 0 | 0 | 0 | 0 | 1 |
| Cluster1894; Planctom Planct Planc Planctomycetaceae     | 0 | 0 | 0 | 0 | 0 | 0 | 0 | 0 | 1 | 0 | 0 | 0 | 1 |
| Cluster1897; Acidobact Acidobacteria_Gp2 Gp2             | 0 | 0 | 0 | 0 | 0 | 0 | 0 | 0 | 0 | 0 | 1 | 0 | 1 |
| Cluster1899; Acidobact Acidobacteria_Gp1                 | 0 | 0 | 0 | 0 | 0 | 0 | 0 | 0 | 0 | 1 | 0 | 0 | 1 |





|                                                              |   |   |   |   |   |   |   |   |   |   |   |   |   |
|--------------------------------------------------------------|---|---|---|---|---|---|---|---|---|---|---|---|---|
| Cluster2193; Acidobact Acidobacteria_Gp2 Gp2                 | 0 | 0 | 0 | 0 | 0 | 0 | 0 | 0 | 0 | 0 | 1 | 0 | 1 |
| Cluster2196; Acidobact Acidobacteria_Gp2 Gp2                 | 0 | 0 | 1 | 0 | 0 | 0 | 0 | 0 | 0 | 0 | 0 | 0 | 1 |
| Cluster2204; Acidobact Acidobacteria_Gp1                     | 0 | 0 | 0 | 0 | 1 | 0 | 0 | 0 | 0 | 0 | 0 | 0 | 1 |
| Cluster2205; Planctom Planct Planct Planctol Singulisphaera  | 0 | 0 | 0 | 0 | 0 | 0 | 0 | 0 | 0 | 0 | 0 | 1 | 1 |
| Cluster2216; size=8                                          | 0 | 0 | 0 | 1 | 0 | 0 | 0 | 0 | 0 | 0 | 0 | 0 | 1 |
| Cluster2219; Planctom Planct Planct Planctomycetaceae        | 0 | 0 | 0 | 1 | 0 | 0 | 0 | 0 | 0 | 0 | 0 | 0 | 1 |
| Cluster2223; Proteobac Alphap Rhod Acetobacteraceae          | 0 | 0 | 1 | 0 | 0 | 0 | 0 | 0 | 0 | 0 | 0 | 0 | 1 |
| Cluster2226; size=6                                          | 0 | 0 | 0 | 0 | 0 | 0 | 0 | 0 | 0 | 0 | 0 | 1 | 1 |
| Cluster2231; size=10                                         | 1 | 0 | 0 | 0 | 0 | 0 | 0 | 0 | 0 | 0 | 0 | 0 | 1 |
| Cluster2238; Acidobact Acidobacteria_Gp1                     | 0 | 0 | 0 | 0 | 1 | 0 | 0 | 0 | 0 | 0 | 0 | 0 | 1 |
| Cluster2240; Gemmatir Gemm Gem Gemma Gemmatimona             | 0 | 0 | 0 | 0 | 0 | 0 | 0 | 0 | 0 | 0 | 0 | 1 | 1 |
| Cluster2242; Proteobac Alphaproteobacteria                   | 0 | 0 | 0 | 0 | 0 | 0 | 0 | 0 | 0 | 1 | 0 | 0 | 1 |
| Cluster2256; Chloroflex Ktedon Ktedon Ktedon Ktedonobacter   | 0 | 1 | 0 | 0 | 0 | 0 | 0 | 0 | 0 | 0 | 0 | 0 | 1 |
| Cluster2261; Acidobact Acidobacteria_Gp1                     | 0 | 1 | 0 | 0 | 0 | 0 | 0 | 0 | 0 | 0 | 0 | 0 | 1 |
| Cluster2263; Proteobac Alphap Rhizobiales                    | 0 | 0 | 0 | 0 | 0 | 0 | 1 | 0 | 0 | 0 | 0 | 0 | 1 |
| Cluster2273; Proteobac Alphap Rhodospirillales               | 0 | 0 | 0 | 0 | 0 | 1 | 0 | 0 | 0 | 0 | 0 | 0 | 1 |
| Cluster2292; Proteobac Alphaproteobacteria                   | 0 | 0 | 0 | 1 | 0 | 0 | 0 | 0 | 0 | 0 | 0 | 0 | 1 |
| Cluster2296; Actinobac Actinol Acidi Acidimii Aciditerrimona | 0 | 0 | 0 | 1 | 0 | 0 | 0 | 0 | 0 | 0 | 0 | 0 | 1 |
| Cluster2298; Proteobac Gamm Legio Coxiella Aquicella         | 0 | 1 | 0 | 0 | 0 | 0 | 0 | 0 | 0 | 0 | 0 | 0 | 1 |
| Cluster2301; Acidobact Acidobacteria_Gp2 Gp2                 | 0 | 0 | 0 | 1 | 0 | 0 | 0 | 0 | 0 | 0 | 0 | 0 | 1 |
| Cluster2302; Proteobac Deltaproteobacteria                   | 0 | 0 | 0 | 1 | 0 | 0 | 0 | 0 | 0 | 0 | 0 | 0 | 1 |
| Cluster2307; Proteobac Alphap Caulc Cauloba Brevundimona     | 1 | 0 | 0 | 0 | 0 | 0 | 0 | 0 | 0 | 0 | 0 | 0 | 1 |
| Cluster2309; Proteobac Alphap Rhodospirillales               | 0 | 0 | 0 | 0 | 0 | 1 | 0 | 0 | 0 | 0 | 0 | 0 | 1 |
| Cluster2311; Proteobac Alphap Rhizobiales                    | 0 | 0 | 0 | 0 | 0 | 0 | 0 | 0 | 0 | 0 | 1 | 0 | 1 |
| Cluster2314; Acidobact Acidobacteria_Gp3 Gp3                 | 0 | 0 | 0 | 0 | 0 | 0 | 0 | 0 | 0 | 1 | 0 | 0 | 1 |
| Cluster2321; Proteobacteria                                  | 0 | 0 | 0 | 0 | 0 | 1 | 0 | 0 | 0 | 0 | 0 | 0 | 1 |
| Cluster2328; Acidobact Acidobacteria_Gp2 Gp2                 | 0 | 0 | 0 | 0 | 1 | 0 | 0 | 0 | 0 | 0 | 0 | 0 | 1 |
| Cluster2335; Proteobac Deltap Myxc Polyangiaceae             | 0 | 0 | 0 | 0 | 0 | 0 | 0 | 0 | 0 | 1 | 0 | 0 | 1 |
| Cluster2349; Acidobact Acidobacteria_Gp3                     | 0 | 0 | 0 | 0 | 0 | 0 | 0 | 0 | 0 | 0 | 1 | 0 | 1 |





|                                                            |   |   |   |   |   |   |   |   |   |   |   |   |   |
|------------------------------------------------------------|---|---|---|---|---|---|---|---|---|---|---|---|---|
| Cluster2586; Acidobact Acidobacteria_Gp1                   | 0 | 1 | 0 | 0 | 0 | 0 | 0 | 0 | 0 | 0 | 0 | 0 | 1 |
| Cluster2593; size=1                                        | 0 | 0 | 0 | 0 | 0 | 0 | 0 | 0 | 0 | 0 | 0 | 1 | 1 |
| Cluster2598; Proteobac Gammaproteobacteria                 | 0 | 1 | 0 | 0 | 0 | 0 | 0 | 0 | 0 | 0 | 0 | 0 | 1 |
| Cluster2600; Acidobact Acidobacteria_Gp1 Gp1               | 1 | 0 | 0 | 0 | 0 | 0 | 0 | 0 | 0 | 0 | 0 | 0 | 1 |
| Cluster2606; size=12                                       | 0 | 0 | 1 | 0 | 0 | 0 | 0 | 0 | 0 | 0 | 0 | 0 | 1 |
| Cluster2608; Acidobact Acidobacteria_Gp3                   | 0 | 0 | 0 | 0 | 0 | 0 | 0 | 0 | 0 | 1 | 0 | 0 | 1 |
| Cluster2626; Acidobact Acidobacteria_Gp2 Gp2               | 0 | 0 | 0 | 1 | 0 | 0 | 0 | 0 | 0 | 0 | 0 | 0 | 1 |
| Cluster2629; Actinobac Actinol Actin Thermomonosporacea    | 0 | 0 | 0 | 0 | 0 | 0 | 0 | 0 | 0 | 0 | 1 | 0 | 1 |
| Cluster2634; Chlamydi; Chlamy Chlamydiales                 | 0 | 0 | 0 | 0 | 0 | 0 | 0 | 0 | 0 | 1 | 0 | 0 | 1 |
| Cluster2636; Verrucom Subdivision3 Subdivision3_ξ          | 1 | 0 | 0 | 0 | 0 | 0 | 0 | 0 | 0 | 0 | 0 | 0 | 1 |
| Cluster2641; Proteobac Betaproteobacteria                  | 0 | 0 | 1 | 0 | 0 | 0 | 0 | 0 | 0 | 0 | 0 | 0 | 1 |
| Cluster2644; size=4                                        | 0 | 0 | 0 | 1 | 0 | 0 | 0 | 0 | 0 | 0 | 0 | 0 | 1 |
| Cluster2653; Proteobac Alphap Caulc Caulobacteraceae       | 0 | 0 | 0 | 1 | 0 | 0 | 0 | 0 | 0 | 0 | 0 | 0 | 1 |
| Cluster2657; Actinobac Actinol Actin Mycoba Mycobacteriur  | 1 | 0 | 0 | 0 | 0 | 0 | 0 | 0 | 0 | 0 | 0 | 0 | 1 |
| Cluster2661; size=3                                        | 0 | 0 | 0 | 0 | 0 | 1 | 0 | 0 | 0 | 0 | 0 | 0 | 1 |
| Cluster2662; Proteobac Deltaproteobacteria                 | 0 | 0 | 0 | 0 | 0 | 0 | 0 | 0 | 0 | 1 | 0 | 0 | 1 |
| Cluster2663; Bacteroid Sphing Sphir Sphingo Mucilaginibact | 0 | 0 | 0 | 0 | 0 | 0 | 0 | 1 | 0 | 0 | 0 | 0 | 1 |
| Cluster2667; Proteobac Alphap Rhodospirillales             | 0 | 0 | 0 | 0 | 0 | 0 | 1 | 0 | 0 | 0 | 0 | 0 | 1 |
| Cluster2671; size=2                                        | 0 | 0 | 0 | 0 | 1 | 0 | 0 | 0 | 0 | 0 | 0 | 0 | 1 |
| Cluster2672; Bacteroid Sphing Sphir Chitinophagaceae       | 0 | 1 | 0 | 0 | 0 | 0 | 0 | 0 | 0 | 0 | 0 | 0 | 1 |
| Cluster2679; Acidobact Acidobacteria_Gp2 Gp2               | 0 | 0 | 0 | 1 | 0 | 0 | 0 | 0 | 0 | 0 | 0 | 0 | 1 |
| Cluster2683; Acidobact Acidobacteria_Gp2 Gp2               | 0 | 0 | 0 | 0 | 0 | 0 | 0 | 0 | 1 | 0 | 0 | 0 | 1 |
| Cluster2686; Acidobact Acidobacteria_Gp2 Gp2               | 0 | 0 | 1 | 0 | 0 | 0 | 0 | 0 | 0 | 0 | 0 | 0 | 1 |
| Cluster2690; Acidobact Acidobacteria_Gp2 Gp2               | 1 | 0 | 0 | 0 | 0 | 0 | 0 | 0 | 0 | 0 | 0 | 0 | 1 |
| Cluster2701; Bacteroid Sphing Sphir Chitinophagaceae       | 0 | 0 | 0 | 0 | 1 | 0 | 0 | 0 | 0 | 0 | 0 | 0 | 1 |
| Cluster2708; size=1                                        | 0 | 1 | 0 | 0 | 0 | 0 | 0 | 0 | 0 | 0 | 0 | 0 | 1 |
| Cluster2722; Proteobacteria                                | 0 | 0 | 0 | 0 | 0 | 0 | 0 | 1 | 0 | 0 | 0 | 0 | 1 |
| Cluster2725; Acidobact Acidobacteria_Gp2 Gp2               | 0 | 0 | 0 | 0 | 0 | 0 | 1 | 0 | 0 | 0 | 0 | 0 | 1 |
| Cluster2727; Acidobact Acidobacteria_Gp1 Acidobacteriur    | 0 | 0 | 0 | 0 | 0 | 0 | 0 | 1 | 0 | 0 | 0 | 0 | 1 |









|                                                             |   |   |   |   |   |   |   |   |   |   |   |   |   |
|-------------------------------------------------------------|---|---|---|---|---|---|---|---|---|---|---|---|---|
| Cluster3155; Acidobact Acidobacteria_Gp1 Gp1                | 0 | 0 | 1 | 0 | 0 | 0 | 0 | 0 | 0 | 0 | 0 | 0 | 1 |
| Cluster3157; Acidobact Acidobacteria_Gp1 Gp1                | 1 | 0 | 0 | 0 | 0 | 0 | 0 | 0 | 0 | 0 | 0 | 0 | 1 |
| Cluster3158; Acidobacteria                                  | 0 | 0 | 0 | 0 | 0 | 1 | 0 | 0 | 0 | 0 | 0 | 0 | 1 |
| Cluster3167; Proteobac Alphap Rhodospirillales              | 0 | 0 | 0 | 0 | 0 | 0 | 0 | 0 | 0 | 1 | 0 | 0 | 1 |
| Cluster3168; Firmicute: Bacilli Bacill Pasteuri Pasteuria   | 0 | 0 | 0 | 0 | 0 | 0 | 1 | 0 | 0 | 0 | 0 | 0 | 1 |
| Cluster3169; size=2                                         | 0 | 0 | 0 | 1 | 0 | 0 | 0 | 0 | 0 | 0 | 0 | 0 | 1 |
| Cluster3170; Proteobac Alphap Rhizc Rhizobi: Rhizobium      | 0 | 0 | 0 | 0 | 0 | 0 | 0 | 0 | 0 | 1 | 0 | 0 | 1 |
| Cluster3192; size=1                                         | 0 | 0 | 0 | 0 | 0 | 1 | 0 | 0 | 0 | 0 | 0 | 0 | 1 |
| Cluster3196; size=6                                         | 0 | 0 | 1 | 0 | 0 | 0 | 0 | 0 | 0 | 0 | 0 | 0 | 1 |
| Cluster3197; Bacteroid Sphing Sphir Sphingo Nubsella        | 0 | 0 | 0 | 0 | 0 | 1 | 0 | 0 | 0 | 0 | 0 | 0 | 1 |
| Cluster3200; Acidobact Acidobacteria_Gp3 Gp3                | 0 | 0 | 1 | 0 | 0 | 0 | 0 | 0 | 0 | 0 | 0 | 0 | 1 |
| Cluster3207; size=1                                         | 0 | 0 | 0 | 0 | 0 | 0 | 1 | 0 | 0 | 0 | 0 | 0 | 1 |
| Cluster3211; Proteobac Alphap Rhizc Bradyrh Bradyrhizobiur  | 1 | 0 | 0 | 0 | 0 | 0 | 0 | 0 | 0 | 0 | 0 | 0 | 1 |
| Cluster3213; size=2                                         | 0 | 0 | 0 | 0 | 1 | 0 | 0 | 0 | 0 | 0 | 0 | 0 | 1 |
| Cluster3216; Acidobact Acidobacteria_Gp1                    | 0 | 0 | 1 | 0 | 0 | 0 | 0 | 0 | 0 | 0 | 0 | 0 | 1 |
| Cluster3218; Proteobac Alphaproteobacteria                  | 0 | 0 | 0 | 1 | 0 | 0 | 0 | 0 | 0 | 0 | 0 | 0 | 1 |
| Cluster3233; Proteobac Alphap Rhodospirillales              | 0 | 0 | 0 | 0 | 0 | 0 | 0 | 0 | 0 | 0 | 1 | 0 | 1 |
| Cluster3236; Proteobac Alphap Rhizobiales                   | 0 | 0 | 0 | 1 | 0 | 0 | 0 | 0 | 0 | 0 | 0 | 0 | 1 |
| Cluster3240; Proteobac Betapr Burkholderiales               | 0 | 0 | 0 | 0 | 0 | 0 | 0 | 0 | 0 | 0 | 1 | 0 | 1 |
| Cluster3242; Proteobac Alphap Rhizc Bradyrh Bradyrhizobiur  | 0 | 0 | 0 | 0 | 0 | 0 | 0 | 1 | 0 | 0 | 0 | 0 | 1 |
| Cluster3247; Proteobac Alphap Rhodospirillales              | 0 | 0 | 0 | 0 | 0 | 0 | 0 | 0 | 0 | 0 | 0 | 1 | 1 |
| Cluster3252; Proteobac Betapr Burkl Burkhol Burkholderia    | 0 | 0 | 0 | 1 | 0 | 0 | 0 | 0 | 0 | 0 | 0 | 0 | 1 |
| Cluster3254; Actinobac Actinol Acidi Acidimi Aciditerrimona | 1 | 0 | 0 | 0 | 0 | 0 | 0 | 0 | 0 | 0 | 0 | 0 | 1 |
| Cluster3265; Proteobac Deltap Myxc Cystobacteraceae         | 0 | 0 | 0 | 0 | 0 | 0 | 0 | 0 | 0 | 1 | 0 | 0 | 1 |
| Cluster3266; Acidobacteria                                  | 0 | 0 | 0 | 0 | 0 | 0 | 0 | 0 | 0 | 1 | 0 | 0 | 1 |
| Cluster3276; Acidobact Acidobacteria_Gp1                    | 0 | 1 | 0 | 0 | 0 | 0 | 0 | 0 | 0 | 0 | 0 | 0 | 1 |
| Cluster3284; Proteobac Alphap Rhod Rhodospirillaceae        | 1 | 0 | 0 | 0 | 0 | 0 | 0 | 0 | 0 | 0 | 0 | 0 | 1 |
| Cluster3285; Acidobact Acidobacteria_Gp1 Gp1                | 0 | 0 | 0 | 1 | 0 | 0 | 0 | 0 | 0 | 0 | 0 | 0 | 1 |
| Cluster3287; size=3                                         | 0 | 0 | 0 | 0 | 0 | 0 | 0 | 0 | 0 | 0 | 1 | 0 | 1 |

|                                                                 |   |   |   |   |   |   |   |   |   |   |   |   |   |
|-----------------------------------------------------------------|---|---|---|---|---|---|---|---|---|---|---|---|---|
| Cluster3288; Acidobact Acidobacteria_Gp2 Gp2                    | 0 | 0 | 0 | 0 | 0 | 0 | 0 | 0 | 0 | 0 | 1 | 0 | 1 |
| Cluster3289; Proteobac Alphap Rhod Rhodospirillaceae            | 0 | 0 | 0 | 0 | 0 | 0 | 0 | 0 | 0 | 0 | 0 | 1 | 1 |
| Cluster3295; Verrucom Opitutae                                  | 0 | 0 | 0 | 0 | 0 | 0 | 0 | 0 | 0 | 0 | 0 | 1 | 1 |
| Cluster3300; Proteobac Alphap Rhizc Xantho Pseudolabrys         | 1 | 0 | 0 | 0 | 0 | 0 | 0 | 0 | 0 | 0 | 0 | 0 | 1 |
| Cluster3301; Proteobac Alphap Rhodospirillales                  | 0 | 1 | 0 | 0 | 0 | 0 | 0 | 0 | 0 | 0 | 0 | 0 | 1 |
| Cluster3302; Bacteroid Sphing Sphir Chitino Flavitalea          | 0 | 0 | 0 | 0 | 0 | 0 | 0 | 1 | 0 | 0 | 0 | 0 | 1 |
| Cluster3303; Proteobac Alphap Rhodospirillales                  | 0 | 0 | 0 | 0 | 0 | 0 | 0 | 1 | 0 | 0 | 0 | 0 | 1 |
| Cluster3309; Firmicute Bacilli Bacill Alicyclo Alicyclobacillus | 0 | 1 | 0 | 0 | 0 | 0 | 0 | 0 | 0 | 0 | 0 | 0 | 1 |
| Cluster3319; Acidobact Acidobacteria_Gp1                        | 0 | 0 | 0 | 1 | 0 | 0 | 0 | 0 | 0 | 0 | 0 | 0 | 1 |
| Cluster3320; Acidobact Acidobacteria_Gp1                        | 0 | 0 | 0 | 0 | 0 | 0 | 0 | 0 | 1 | 0 | 0 | 0 | 1 |
| Cluster3321; size=3                                             | 0 | 0 | 0 | 0 | 0 | 0 | 0 | 1 | 0 | 0 | 0 | 0 | 1 |
| Cluster3322; Armatimonadetes Armatimonade                       | 0 | 0 | 0 | 0 | 0 | 0 | 0 | 0 | 0 | 0 | 0 | 1 | 1 |
| Cluster3326; Acidobact Acidobacteria_Gp1                        | 0 | 1 | 0 | 0 | 0 | 0 | 0 | 0 | 0 | 0 | 0 | 0 | 1 |
| Cluster3334; Verrucom Opitut; Opitu Opituta Opitutus            | 0 | 0 | 0 | 0 | 0 | 1 | 0 | 0 | 0 | 0 | 0 | 0 | 1 |
| Cluster3335; Verrucom Opitut; Opitu Opituta Opitutus            | 0 | 0 | 0 | 0 | 1 | 0 | 0 | 0 | 0 | 0 | 0 | 0 | 1 |
| Cluster3346; Acidobact Acidobacteria_Gp1 Gp1                    | 0 | 0 | 0 | 1 | 0 | 0 | 0 | 0 | 0 | 0 | 0 | 0 | 1 |
| Cluster3347; Acidobact Acidobacteria_Gp3 Gp3                    | 1 | 0 | 0 | 0 | 0 | 0 | 0 | 0 | 0 | 0 | 0 | 0 | 1 |
| Cluster3355; Bacteroid Sphing Sphir Sphingo Mucilaginibact      | 0 | 0 | 1 | 0 | 0 | 0 | 0 | 0 | 0 | 0 | 0 | 0 | 1 |
| Cluster3356; size=1                                             | 0 | 1 | 0 | 0 | 0 | 0 | 0 | 0 | 0 | 0 | 0 | 0 | 1 |
| Cluster3361; Proteobac Betapr Burkl Burkhol Burkholderia        | 0 | 0 | 0 | 1 | 0 | 0 | 0 | 0 | 0 | 0 | 0 | 0 | 1 |
| Cluster3364; size=3                                             | 0 | 0 | 0 | 1 | 0 | 0 | 0 | 0 | 0 | 0 | 0 | 0 | 1 |
| Cluster3365; Acidobact Acidobacteria_Gp2 Gp2                    | 0 | 0 | 0 | 0 | 1 | 0 | 0 | 0 | 0 | 0 | 0 | 0 | 1 |
| Cluster3373; Proteobac Alphap Rhod Rhodos Dongia                | 0 | 0 | 0 | 0 | 1 | 0 | 0 | 0 | 0 | 0 | 0 | 0 | 1 |
| Cluster3383; Actinobac Actino Actinomycetales                   | 0 | 0 | 0 | 0 | 0 | 0 | 0 | 1 | 0 | 0 | 0 | 0 | 1 |
| Cluster3384; size=8                                             | 0 | 0 | 0 | 1 | 0 | 0 | 0 | 0 | 0 | 0 | 0 | 0 | 1 |
| Cluster3386; Acidobact Acidobacteria_Gp13 Gp13                  | 0 | 0 | 0 | 0 | 0 | 0 | 0 | 0 | 0 | 0 | 0 | 1 | 1 |
| Cluster3387; size=1                                             | 0 | 0 | 0 | 0 | 0 | 0 | 0 | 0 | 1 | 0 | 0 | 0 | 1 |
| Cluster3392; Proteobac Alphap Alphaproteot Rhizomicrobiu        | 1 | 0 | 0 | 0 | 0 | 0 | 0 | 0 | 0 | 0 | 0 | 0 | 1 |
| Cluster3411; Planctom Planct Planc Plancto Singulisphaera       | 0 | 0 | 0 | 0 | 0 | 0 | 0 | 1 | 0 | 0 | 0 | 0 | 1 |



|                                                            |   |   |   |   |   |   |   |   |   |   |   |   |   |
|------------------------------------------------------------|---|---|---|---|---|---|---|---|---|---|---|---|---|
| Cluster3566; Acidobact Acidobacteria_Gp2 Gp2               | 0 | 0 | 0 | 1 | 0 | 0 | 0 | 0 | 0 | 0 | 0 | 0 | 1 |
| Cluster3572; Proteobac Betapr Burkli Burkhol Burkholderia  | 1 | 0 | 0 | 0 | 0 | 0 | 0 | 0 | 0 | 0 | 0 | 0 | 1 |
| Cluster3584; Chloroflex Ktedor Ktedo Ktedon Ktedonobacter  | 0 | 1 | 0 | 0 | 0 | 0 | 0 | 0 | 0 | 0 | 0 | 0 | 1 |
| Cluster3587; Bacteroid Sphing Sphir Sphingo Mucilaginibact | 0 | 0 | 1 | 0 | 0 | 0 | 0 | 0 | 0 | 0 | 0 | 0 | 1 |
| Cluster3602; Proteobac Alphaproteobacteria                 | 0 | 0 | 0 | 0 | 0 | 0 | 0 | 1 | 0 | 0 | 0 | 0 | 1 |
| Cluster3606; Proteobac Alphap Rhizc Bradyrh Bradyrhizobiur | 0 | 1 | 0 | 0 | 0 | 0 | 0 | 0 | 0 | 0 | 0 | 0 | 1 |
| Cluster3611; Acidobact Acidobacteria_Gp1 Edaphobacter      | 0 | 0 | 1 | 0 | 0 | 0 | 0 | 0 | 0 | 0 | 0 | 0 | 1 |
| Cluster3627; Proteobac Gamm Legio Coxiella Aquicella       | 0 | 0 | 0 | 0 | 1 | 0 | 0 | 0 | 0 | 0 | 0 | 0 | 1 |
| Cluster3633; Planctomycetes                                | 0 | 0 | 0 | 0 | 0 | 0 | 0 | 1 | 0 | 0 | 0 | 0 | 1 |
| Cluster3636; Acidobact Acidobacteria_Gp1                   | 0 | 0 | 0 | 0 | 0 | 0 | 0 | 1 | 0 | 0 | 0 | 0 | 1 |
| Cluster3651; Acidobact Acidobacteria_Gp2 Gp2               | 0 | 0 | 0 | 1 | 0 | 0 | 0 | 0 | 0 | 0 | 0 | 0 | 1 |
| Cluster3653; Proteobac Alphap Rhod Acetobz Stella          | 0 | 0 | 0 | 0 | 0 | 0 | 0 | 0 | 0 | 1 | 0 | 0 | 1 |
| Cluster3657; Actinobac Actinol Solirt Conexib Conexibacter | 0 | 0 | 0 | 0 | 0 | 0 | 0 | 0 | 0 | 1 | 0 | 0 | 1 |
| Cluster3658; Proteobac Alphap Rhodospirillales             | 0 | 0 | 0 | 0 | 0 | 0 | 0 | 0 | 0 | 0 | 1 | 0 | 1 |
| Cluster3660; Acidobact Acidobacteria_Gp2 Gp2               | 0 | 0 | 0 | 0 | 1 | 0 | 0 | 0 | 0 | 0 | 0 | 0 | 1 |
| Cluster3667; Verrucom Opitutae                             | 0 | 0 | 0 | 0 | 0 | 0 | 0 | 0 | 0 | 1 | 0 | 0 | 1 |
| Cluster3669; Acidobact Acidobacteria_Gp2 Gp2               | 0 | 0 | 0 | 0 | 1 | 0 | 0 | 0 | 0 | 0 | 0 | 0 | 1 |
| Cluster3677;size=3                                         | 0 | 0 | 0 | 0 | 0 | 0 | 0 | 0 | 0 | 0 | 0 | 1 | 1 |
| Cluster3678;size=1                                         | 0 | 0 | 0 | 0 | 0 | 0 | 0 | 0 | 0 | 0 | 0 | 1 | 1 |
| Cluster3688; Proteobac Deltap Myxococcales                 | 0 | 1 | 0 | 0 | 0 | 0 | 0 | 0 | 0 | 0 | 0 | 0 | 1 |
| Cluster3692; Proteobac Alphap Rhizobiales                  | 0 | 0 | 0 | 0 | 0 | 0 | 1 | 0 | 0 | 0 | 0 | 0 | 1 |
| Cluster3696;size=1                                         | 0 | 0 | 0 | 0 | 0 | 0 | 0 | 0 | 0 | 1 | 0 | 0 | 1 |
| Cluster3697;size=1                                         | 0 | 0 | 0 | 0 | 0 | 0 | 1 | 0 | 0 | 0 | 0 | 0 | 1 |
| Cluster3698; Verrucom Opitut; Opitu Opituta Opitutus       | 0 | 0 | 1 | 0 | 0 | 0 | 0 | 0 | 0 | 0 | 0 | 0 | 1 |
| Cluster3700; Proteobac Alphap Rhodospirillales             | 0 | 0 | 0 | 0 | 0 | 0 | 0 | 0 | 1 | 0 | 0 | 0 | 1 |
| Cluster3702; Proteobac Gammaproteobacteria                 | 0 | 0 | 0 | 0 | 0 | 0 | 0 | 0 | 0 | 0 | 1 | 0 | 1 |
| Cluster3707; Proteobac Alphaproteobacteria                 | 0 | 0 | 0 | 1 | 0 | 0 | 0 | 0 | 0 | 0 | 0 | 0 | 1 |
| Cluster3710; Acidobact Acidobacteria_Gp1 Acidobacteriur    | 0 | 0 | 0 | 0 | 0 | 0 | 1 | 0 | 0 | 0 | 0 | 0 | 1 |
| Cluster3714; Acidobact Acidobacteria_Gp1 Gp1               | 0 | 0 | 0 | 0 | 0 | 0 | 1 | 0 | 0 | 0 | 0 | 0 | 1 |

|                                                            |   |   |   |   |   |   |   |   |   |   |   |   |   |
|------------------------------------------------------------|---|---|---|---|---|---|---|---|---|---|---|---|---|
| Cluster3732; Acidobact Acidobacteria_Gp2 Gp2               | 0 | 0 | 0 | 0 | 0 | 0 | 1 | 0 | 0 | 0 | 0 | 0 | 1 |
| Cluster3733; size=3                                        | 0 | 0 | 0 | 1 | 0 | 0 | 0 | 0 | 0 | 0 | 0 | 0 | 1 |
| Cluster3739; Proteobac Alphap Rhodospirillales             | 0 | 0 | 0 | 0 | 0 | 0 | 0 | 1 | 0 | 0 | 0 | 0 | 1 |
| Cluster3740; size=2                                        | 0 | 1 | 0 | 0 | 0 | 0 | 0 | 0 | 0 | 0 | 0 | 0 | 1 |
| Cluster3750; Proteobac Alphap Rhodospirillales             | 0 | 0 | 0 | 0 | 0 | 0 | 0 | 0 | 0 | 0 | 1 | 0 | 1 |
| Cluster3752; Acidobact Acidobacteria_Gp2 Gp2               | 0 | 0 | 0 | 0 | 0 | 0 | 0 | 0 | 0 | 0 | 0 | 1 | 1 |
| Cluster3764; size=2                                        | 0 | 1 | 0 | 0 | 0 | 0 | 0 | 0 | 0 | 0 | 0 | 0 | 1 |
| Cluster3770; Proteobac Alphap Rhod Rhodospirillaceae       | 0 | 0 | 0 | 0 | 0 | 0 | 0 | 0 | 0 | 0 | 1 | 0 | 1 |
| Cluster3780; Proteobac Alphap Rhodospirillales             | 0 | 0 | 0 | 0 | 0 | 0 | 0 | 0 | 0 | 0 | 1 | 0 | 1 |
| Cluster3783; Proteobac Alphap Rhizobiales                  | 0 | 0 | 0 | 0 | 0 | 0 | 0 | 0 | 0 | 0 | 0 | 1 | 1 |
| Cluster3799; Armatimc Armati Arma Armatin Armatimonas/     | 0 | 0 | 0 | 0 | 0 | 1 | 0 | 0 | 0 | 0 | 0 | 0 | 1 |
| Cluster3800; Acidobact Acidobacteria_Gp2 Gp2               | 0 | 0 | 0 | 0 | 0 | 0 | 0 | 0 | 0 | 0 | 1 | 0 | 1 |
| Cluster3802; Proteobac Alphap Rhizc Bradyrh Bradyrhizobiur | 0 | 0 | 0 | 0 | 0 | 0 | 0 | 0 | 0 | 0 | 1 | 0 | 1 |
| Cluster3806; size=9                                        | 0 | 0 | 0 | 1 | 0 | 0 | 0 | 0 | 0 | 0 | 0 | 0 | 1 |
| Cluster3807; Acidobact Acidobacteria_Gp3                   | 1 | 0 | 0 | 0 | 0 | 0 | 0 | 0 | 0 | 0 | 0 | 0 | 1 |
| Cluster3821; Proteobac Alphap Rhizc Bradyrh Bradyrhizobiur | 0 | 0 | 0 | 0 | 0 | 0 | 1 | 0 | 0 | 0 | 0 | 0 | 1 |
| Cluster3822; Acidobact Acidobacteria_Gp1                   | 0 | 0 | 0 | 0 | 0 | 0 | 0 | 0 | 0 | 0 | 0 | 1 | 1 |
| Cluster3827; Acidobact Acidobacteria_Gp1                   | 0 | 0 | 0 | 0 | 0 | 0 | 1 | 0 | 0 | 0 | 0 | 0 | 1 |
| Cluster3830; Acidobact Acidobacteria_Gp2 Gp2               | 0 | 0 | 0 | 0 | 1 | 0 | 0 | 0 | 0 | 0 | 0 | 0 | 1 |
| Cluster3835; Proteobac Alphap Rhodospirillales             | 0 | 0 | 0 | 0 | 0 | 0 | 0 | 0 | 0 | 0 | 1 | 0 | 1 |
| Cluster3838; size=1                                        | 0 | 0 | 0 | 0 | 0 | 0 | 0 | 0 | 0 | 0 | 0 | 1 | 1 |
| Cluster3859; Proteobac Alphap Rhodospirillales             | 0 | 1 | 0 | 0 | 0 | 0 | 0 | 0 | 0 | 0 | 0 | 0 | 1 |
| Cluster3866; Proteobac Alphap Rhodospirillales             | 0 | 0 | 0 | 0 | 0 | 0 | 1 | 0 | 0 | 0 | 0 | 0 | 1 |
| Cluster3870; Planctom Planct Planc Planctomycetaceae       | 0 | 0 | 0 | 0 | 0 | 1 | 0 | 0 | 0 | 0 | 0 | 0 | 1 |
| Cluster3878; Proteobac Alphap Rhizc Xantho Pseudolabrys    | 0 | 0 | 0 | 0 | 0 | 0 | 0 | 0 | 1 | 0 | 0 | 0 | 1 |
| Cluster3882; size=3                                        | 0 | 0 | 0 | 1 | 0 | 0 | 0 | 0 | 0 | 0 | 0 | 0 | 1 |
| Cluster3884; size=1                                        | 1 | 0 | 0 | 0 | 0 | 0 | 0 | 0 | 0 | 0 | 0 | 0 | 1 |
| Cluster3886; Actinobac Actinol Solirt Conexib Conexibacter | 0 | 0 | 0 | 0 | 0 | 0 | 0 | 0 | 0 | 0 | 1 | 0 | 1 |
| Cluster3887; size=3                                        | 0 | 0 | 0 | 0 | 0 | 0 | 0 | 0 | 0 | 0 | 1 | 0 | 1 |





|                                                             |   |   |   |   |   |   |   |   |   |   |   |   |   |
|-------------------------------------------------------------|---|---|---|---|---|---|---|---|---|---|---|---|---|
| Cluster4006; Proteobac Gamm Xantl Sinobac Steroidobacter    | 0 | 0 | 0 | 0 | 0 | 1 | 0 | 0 | 0 | 0 | 0 | 0 | 1 |
| Cluster4011; Acidobact Acidobacteria_Gp1                    | 0 | 0 | 0 | 0 | 0 | 0 | 0 | 0 | 0 | 0 | 0 | 1 | 1 |
| Cluster4013; Acidobact Acidobacteria_Gp1 Gp1                | 0 | 1 | 0 | 0 | 0 | 0 | 0 | 0 | 0 | 0 | 0 | 0 | 1 |
| Cluster4021; Proteobac Alpha; Rhizobiales                   | 0 | 1 | 0 | 0 | 0 | 0 | 0 | 0 | 0 | 0 | 0 | 0 | 1 |
| Cluster4028; Proteobac Alpha; Rhodospirillales              | 0 | 0 | 0 | 0 | 0 | 1 | 0 | 0 | 0 | 0 | 0 | 0 | 1 |
| Cluster4036; Proteobacteria                                 | 0 | 0 | 0 | 0 | 1 | 0 | 0 | 0 | 0 | 0 | 0 | 0 | 1 |
| Cluster4048; Armatimonadetes Armatimonade                   | 0 | 0 | 0 | 0 | 0 | 0 | 1 | 0 | 0 | 0 | 0 | 0 | 1 |
| Cluster4052;size=8                                          | 0 | 0 | 0 | 0 | 0 | 1 | 0 | 0 | 0 | 0 | 0 | 0 | 1 |
| Cluster4054;size=1                                          | 0 | 0 | 0 | 1 | 0 | 0 | 0 | 0 | 0 | 0 | 0 | 0 | 1 |
| Cluster4071; Acidobact Acidobacteria_Gp2 Gp2                | 0 | 0 | 0 | 0 | 0 | 0 | 1 | 0 | 0 | 0 | 0 | 0 | 1 |
| Cluster4074;size=2                                          | 0 | 0 | 0 | 0 | 0 | 0 | 1 | 0 | 0 | 0 | 0 | 0 | 1 |
| Cluster4080; Bacteroid Sphing Sphir Sphingo Mucilaginibact  | 0 | 0 | 0 | 0 | 0 | 0 | 0 | 0 | 0 | 1 | 0 | 0 | 1 |
| Cluster4087; Bacteroid Sphing Sphir Chitino; Flavitalea     | 0 | 0 | 0 | 0 | 1 | 0 | 0 | 0 | 0 | 0 | 0 | 0 | 1 |
| Cluster4092; Proteobac Alpha; Caul; Cauloba; Phenyllobacter | 0 | 0 | 1 | 0 | 0 | 0 | 0 | 0 | 0 | 0 | 0 | 0 | 1 |
| Cluster4094; Acidobact Acidobacteria_Gp1 Acidobacteriur     | 0 | 0 | 0 | 0 | 0 | 0 | 1 | 0 | 0 | 0 | 0 | 0 | 1 |
| Cluster4100; Acidobact Acidobacteria_Gp3 Gp3                | 0 | 0 | 0 | 0 | 1 | 0 | 0 | 0 | 0 | 0 | 0 | 0 | 1 |
| Cluster4101; Acidobact Acidobacteria_Gp1 Edaphobacter       | 0 | 0 | 0 | 0 | 1 | 0 | 0 | 0 | 0 | 0 | 0 | 0 | 1 |
| Cluster4104; Proteobac Gamm Xantl Sinobac Steroidobacter    | 0 | 0 | 0 | 0 | 0 | 0 | 1 | 0 | 0 | 0 | 0 | 0 | 1 |
| Cluster4106; Chlamydi; Chlamy; Chlamydiales                 | 1 | 0 | 0 | 0 | 0 | 0 | 0 | 0 | 0 | 0 | 0 | 0 | 1 |
| Cluster4107; Proteobac Alphaproteobacteria                  | 0 | 0 | 0 | 0 | 0 | 0 | 0 | 0 | 0 | 1 | 0 | 0 | 1 |
| Cluster4111; Acidobact Acidobacteria_Gp2 Gp2                | 0 | 0 | 0 | 0 | 0 | 0 | 1 | 0 | 0 | 0 | 0 | 0 | 1 |
| Cluster4114; Acidobact Acidobacteria_Gp1 Terriglobus        | 0 | 0 | 0 | 0 | 0 | 1 | 0 | 0 | 0 | 0 | 0 | 0 | 1 |
| Cluster4122; Acidobact Acidobacteria_Gp3                    | 0 | 0 | 0 | 0 | 0 | 0 | 0 | 0 | 1 | 0 | 0 | 0 | 1 |
| Cluster4124; Planctomycetes                                 | 0 | 0 | 0 | 0 | 1 | 0 | 0 | 0 | 0 | 0 | 0 | 0 | 1 |
| Cluster4125; Proteobacteria                                 | 0 | 0 | 0 | 0 | 0 | 0 | 0 | 0 | 0 | 1 | 0 | 0 | 1 |
| Cluster4126; Proteobac Alphaproteobacteria                  | 0 | 0 | 0 | 1 | 0 | 0 | 0 | 0 | 0 | 0 | 0 | 0 | 1 |
| Cluster4128; Acidobact Acidobacteria_Gp1 Gp1                | 0 | 0 | 0 | 0 | 1 | 0 | 0 | 0 | 0 | 0 | 0 | 0 | 1 |
| Cluster4129; Verrucom Opitutae                              | 1 | 0 | 0 | 0 | 0 | 0 | 0 | 0 | 0 | 0 | 0 | 0 | 1 |
| Cluster4131; Proteobac Gammaproteobacteria                  | 0 | 0 | 0 | 0 | 0 | 0 | 0 | 0 | 1 | 0 | 0 | 0 | 1 |



|                                                             |   |   |   |   |   |   |   |   |   |   |   |   |   |
|-------------------------------------------------------------|---|---|---|---|---|---|---|---|---|---|---|---|---|
| Cluster4236;size=1                                          | 0 | 0 | 0 | 0 | 0 | 0 | 1 | 0 | 0 | 0 | 0 | 0 | 1 |
| Cluster4248; Proteobac Betaproteobacteria                   | 0 | 0 | 1 | 0 | 0 | 0 | 0 | 0 | 0 | 0 | 0 | 0 | 1 |
| Cluster4250; Armatimc Armati Arma Armatin Armatimonas/      | 0 | 0 | 1 | 0 | 0 | 0 | 0 | 0 | 0 | 0 | 0 | 0 | 1 |
| Cluster4251; Acidobact Acidobacteria_Gp2 Gp2                | 0 | 0 | 0 | 0 | 0 | 0 | 0 | 0 | 1 | 0 | 0 | 0 | 1 |
| Cluster4254; Proteobac Alphap Rhod Acetobacteraceae         | 0 | 0 | 0 | 0 | 0 | 0 | 0 | 0 | 0 | 1 | 0 | 0 | 1 |
| Cluster4255; Proteobac Alphap Alphaproteok Rhizomicrobiu    | 0 | 0 | 0 | 0 | 0 | 0 | 0 | 0 | 1 | 0 | 0 | 0 | 1 |
| Cluster4259; Acidobact Acidobacteria_Gp1                    | 0 | 0 | 0 | 0 | 0 | 0 | 0 | 0 | 0 | 0 | 1 | 0 | 1 |
| Cluster4265; Proteobac Alphap Rhodospirillales              | 0 | 0 | 0 | 0 | 1 | 0 | 0 | 0 | 0 | 0 | 0 | 0 | 1 |
| Cluster4269; Acidobact Acidobacteria_Gp1 Gp1                | 0 | 0 | 0 | 0 | 0 | 0 | 1 | 0 | 0 | 0 | 0 | 0 | 1 |
| Cluster4276; Acidobact Acidobacteria_Gp3                    | 0 | 0 | 1 | 0 | 0 | 0 | 0 | 0 | 0 | 0 | 0 | 0 | 1 |
| Cluster4281; Proteobac Alphap Rhodospirillales              | 0 | 0 | 0 | 0 | 0 | 0 | 0 | 0 | 1 | 0 | 0 | 0 | 1 |
| Cluster4284; Proteobac Betaproteobacteria                   | 0 | 0 | 0 | 0 | 0 | 0 | 0 | 0 | 0 | 0 | 0 | 1 | 1 |
| Cluster4285;size=6                                          | 0 | 0 | 0 | 0 | 1 | 0 | 0 | 0 | 0 | 0 | 0 | 0 | 1 |
| Cluster4287; Proteobac Alphap Rhodospirillales              | 0 | 0 | 0 | 0 | 0 | 0 | 0 | 0 | 1 | 0 | 0 | 0 | 1 |
| Cluster4290; Proteobac Alphap Rhizobiales                   | 0 | 0 | 1 | 0 | 0 | 0 | 0 | 0 | 0 | 0 | 0 | 0 | 1 |
| Cluster4295; Acidobact Acidobacteria_Gp1 Granulicella       | 0 | 0 | 0 | 0 | 0 | 0 | 0 | 0 | 0 | 0 | 1 | 0 | 1 |
| Cluster4297; Bacteroid Sphing Sphir Chitinophagaceae        | 0 | 0 | 0 | 0 | 0 | 1 | 0 | 0 | 0 | 0 | 0 | 0 | 1 |
| Cluster4300; Acidobact Acidobacteria_Gp1 Gp1                | 0 | 0 | 0 | 0 | 0 | 0 | 1 | 0 | 0 | 0 | 0 | 0 | 1 |
| Cluster4303; Acidobact Acidobacteria_Gp10 Gp10              | 0 | 0 | 0 | 0 | 0 | 0 | 0 | 1 | 0 | 0 | 0 | 0 | 1 |
| Cluster4310; Verrucom Subdivision3 Subdivision3_ξ           | 0 | 0 | 1 | 0 | 0 | 0 | 0 | 0 | 0 | 0 | 0 | 0 | 1 |
| Cluster4311; Actinobac Actinol Acidi Acidimi Aciditerrimona | 0 | 0 | 0 | 0 | 0 | 0 | 0 | 0 | 0 | 0 | 0 | 1 | 1 |
| Cluster4312; Acidobact Acidobacteria_Gp1                    | 0 | 0 | 0 | 0 | 0 | 1 | 0 | 0 | 0 | 0 | 0 | 0 | 1 |
| Cluster4315; Proteobac Deltaproteobacteria                  | 0 | 0 | 0 | 0 | 0 | 0 | 0 | 0 | 0 | 0 | 0 | 1 | 1 |
| Cluster4324; Planctomycetes                                 | 0 | 0 | 1 | 0 | 0 | 0 | 0 | 0 | 0 | 0 | 0 | 0 | 1 |
| Cluster4325; Acidobact Acidobacteria_Gp2 Gp2                | 0 | 0 | 0 | 0 | 0 | 1 | 0 | 0 | 0 | 0 | 0 | 0 | 1 |
| Cluster4332; Acidobact Acidobacteria_Gp2 Gp2                | 0 | 1 | 0 | 0 | 0 | 0 | 0 | 0 | 0 | 0 | 0 | 0 | 1 |
| Cluster4333; Verrucom Subdivision3 Subdivision3_ξ           | 0 | 0 | 0 | 0 | 0 | 0 | 0 | 0 | 0 | 0 | 0 | 1 | 1 |
| Cluster4335; Acidobact Acidobacteria_Gp3                    | 0 | 0 | 0 | 0 | 0 | 1 | 0 | 0 | 0 | 0 | 0 | 0 | 1 |
| Cluster4348;size=4                                          | 0 | 0 | 0 | 0 | 0 | 0 | 0 | 0 | 1 | 0 | 0 | 0 | 1 |

|                                                          |   |   |   |   |   |   |   |   |   |   |   |   |   |
|----------------------------------------------------------|---|---|---|---|---|---|---|---|---|---|---|---|---|
| Cluster4355; Planctomycetes                              | 0 | 0 | 0 | 1 | 0 | 0 | 0 | 0 | 0 | 0 | 0 | 0 | 1 |
| Cluster4360; Acidobact Acidobacteria_Gp1                 | 0 | 0 | 0 | 0 | 0 | 0 | 0 | 0 | 0 | 1 | 0 | 0 | 1 |
| Cluster4380;size=2                                       | 0 | 0 | 0 | 0 | 0 | 0 | 1 | 0 | 0 | 0 | 0 | 0 | 1 |
| Cluster4381; Proteobac Deltaproteobacteria               | 0 | 1 | 0 | 0 | 0 | 0 | 0 | 0 | 0 | 0 | 0 | 0 | 1 |
| Cluster4382; Proteobac Gamm Xantl Sinobac Steroidobacter | 0 | 0 | 1 | 0 | 0 | 0 | 0 | 0 | 0 | 0 | 0 | 0 | 1 |
| Cluster4385; Proteobac Alphap Rhodospirillales           | 0 | 0 | 0 | 0 | 0 | 0 | 0 | 0 | 1 | 0 | 0 | 0 | 1 |
| Cluster4398;size=4                                       | 0 | 1 | 0 | 0 | 0 | 0 | 0 | 0 | 0 | 0 | 0 | 0 | 1 |
| Cluster4400; Proteobac Gammaproteobacteria               | 0 | 0 | 0 | 0 | 0 | 0 | 0 | 0 | 1 | 0 | 0 | 0 | 1 |
| Cluster4415; Planctom Planct Planc Planctomycetaceae     | 0 | 0 | 0 | 0 | 0 | 0 | 0 | 0 | 0 | 0 | 1 | 0 | 1 |
| Cluster4433; Acidobacteria                               | 0 | 0 | 1 | 0 | 0 | 0 | 0 | 0 | 0 | 0 | 0 | 0 | 1 |
| Cluster4444; Verrucom Spartobacteria Spartobacteria      | 0 | 0 | 0 | 0 | 0 | 0 | 1 | 0 | 0 | 0 | 0 | 0 | 1 |
| Cluster4448; Proteobac Alphap Rhodospirillales           | 0 | 0 | 0 | 0 | 0 | 0 | 0 | 0 | 1 | 0 | 0 | 0 | 1 |
| Cluster4457; Proteobac Alphap Rhodospirillales           | 0 | 0 | 1 | 0 | 0 | 0 | 0 | 0 | 0 | 0 | 0 | 0 | 1 |
| Cluster4461; Proteobac Alphaproteobacteria               | 0 | 0 | 0 | 0 | 0 | 1 | 0 | 0 | 0 | 0 | 0 | 0 | 1 |
| Cluster4470; Proteobac Gamm Legio Coxiella Aquicella     | 0 | 0 | 0 | 0 | 0 | 0 | 1 | 0 | 0 | 0 | 0 | 0 | 1 |
| Cluster4485; Proteobac Gammaproteobacteria               | 1 | 0 | 0 | 0 | 0 | 0 | 0 | 0 | 0 | 0 | 0 | 0 | 1 |
| Cluster4490; Verrucom Subdivision3 Subdivision3_ξ        | 0 | 0 | 0 | 0 | 0 | 0 | 0 | 0 | 0 | 0 | 1 | 0 | 1 |
| Cluster4492; Proteobac Betapr Burkl Burkhol Burkholderia | 1 | 0 | 0 | 0 | 0 | 0 | 0 | 0 | 0 | 0 | 0 | 0 | 1 |
| Cluster4493;size=1                                       | 0 | 0 | 0 | 1 | 0 | 0 | 0 | 0 | 0 | 0 | 0 | 0 | 1 |
| Cluster4512; Acidobact Acidobacteria_Gp1 Edaphobacter    | 0 | 0 | 0 | 0 | 0 | 0 | 0 | 0 | 0 | 1 | 0 | 0 | 1 |
| Cluster4518; Proteobac Alphap Rhodospirillales           | 0 | 1 | 0 | 0 | 0 | 0 | 0 | 0 | 0 | 0 | 0 | 0 | 1 |
| Cluster4530; Armatimc Armati Arma Armatin Armatimonas/   | 0 | 0 | 0 | 0 | 0 | 0 | 1 | 0 | 0 | 0 | 0 | 0 | 1 |
| Cluster4533;size=11                                      | 0 | 0 | 0 | 0 | 1 | 0 | 0 | 0 | 0 | 0 | 0 | 0 | 1 |
| Cluster4543; Planctomycetes                              | 0 | 0 | 0 | 0 | 0 | 0 | 0 | 0 | 0 | 0 | 1 | 0 | 1 |
| Cluster4552; Acidobact Acidobacteria_Gp3                 | 0 | 0 | 0 | 0 | 0 | 0 | 0 | 0 | 0 | 1 | 0 | 0 | 1 |
| Cluster4557; Acidobact Acidobacteria_Gp2 Gp2             | 0 | 0 | 0 | 0 | 0 | 0 | 0 | 0 | 0 | 1 | 0 | 0 | 1 |
| Cluster4559; Proteobac Deltap Myxococcales               | 0 | 0 | 0 | 1 | 0 | 0 | 0 | 0 | 0 | 0 | 0 | 0 | 1 |
| Cluster4563;size=1                                       | 0 | 0 | 0 | 0 | 0 | 0 | 0 | 0 | 0 | 0 | 0 | 1 | 1 |
| Cluster4573; Acidobacteria                               | 0 | 0 | 0 | 0 | 0 | 1 | 0 | 0 | 0 | 0 | 0 | 0 | 1 |

|                                                               |   |   |   |   |   |   |   |   |   |   |   |   |   |
|---------------------------------------------------------------|---|---|---|---|---|---|---|---|---|---|---|---|---|
| Cluster4576;size=6                                            | 0 | 0 | 0 | 1 | 0 | 0 | 0 | 0 | 0 | 0 | 0 | 0 | 1 |
| Cluster4579;size=1                                            | 0 | 0 | 0 | 0 | 0 | 0 | 0 | 0 | 0 | 1 | 0 | 0 | 1 |
| Cluster4584;size=1                                            | 0 | 0 | 0 | 0 | 1 | 0 | 0 | 0 | 0 | 0 | 0 | 0 | 1 |
| Cluster4585; Verrucom Subdivision3 Subdivision3_ξ             | 0 | 0 | 0 | 0 | 0 | 0 | 0 | 0 | 1 | 0 | 0 | 0 | 1 |
| Cluster4586; Proteobac Betapr Burkholderiaceae                | 0 | 0 | 0 | 0 | 0 | 0 | 0 | 0 | 0 | 0 | 1 | 0 | 1 |
| Cluster4596; Acidobact Acidobacteria_Gp2 Gp2                  | 0 | 0 | 0 | 0 | 1 | 0 | 0 | 0 | 0 | 0 | 0 | 0 | 1 |
| Cluster4611; Verrucom Opitut: Opitu Opituta Opitutus          | 0 | 0 | 0 | 0 | 0 | 0 | 0 | 0 | 0 | 0 | 1 | 0 | 1 |
| Cluster4618; Verrucom Opitut: Opitu Opituta Opitutus          | 0 | 0 | 0 | 0 | 0 | 0 | 0 | 0 | 0 | 0 | 0 | 1 | 1 |
| Cluster4622; Proteobac Alphaproteobacteria                    | 0 | 0 | 0 | 0 | 0 | 0 | 0 | 0 | 0 | 0 | 0 | 1 | 1 |
| Cluster4633; Proteobac Alphap Rhizobiales                     | 0 | 0 | 0 | 0 | 1 | 0 | 0 | 0 | 0 | 0 | 0 | 0 | 1 |
| Cluster4636;size=1                                            | 0 | 0 | 0 | 0 | 0 | 0 | 0 | 0 | 0 | 0 | 1 | 0 | 1 |
| Cluster4645; Proteobac Alphap Rhizc Xantho Labrys             | 1 | 0 | 0 | 0 | 0 | 0 | 0 | 0 | 0 | 0 | 0 | 0 | 1 |
| Cluster4652; Proteobac Alphap Rhizc Xantho Pseudolabrys       | 0 | 0 | 0 | 1 | 0 | 0 | 0 | 0 | 0 | 0 | 0 | 0 | 1 |
| Cluster4662; Elusimicrc Elusim Elusir Elusimic Elusimicrobiun | 0 | 0 | 0 | 0 | 0 | 0 | 0 | 0 | 0 | 0 | 1 | 0 | 1 |
| Cluster4665; Acidobact Acidobacteria_Gp3 Gp3                  | 0 | 0 | 0 | 0 | 0 | 0 | 0 | 1 | 0 | 0 | 0 | 0 | 1 |
| Cluster4667; Proteobac Alphap Rhizc Bradyrhizobiaceae         | 0 | 0 | 0 | 1 | 0 | 0 | 0 | 0 | 0 | 0 | 0 | 0 | 1 |
| Cluster4669;size=1                                            | 0 | 0 | 0 | 0 | 0 | 0 | 0 | 0 | 0 | 0 | 1 | 0 | 1 |
| Cluster4674;size=3                                            | 0 | 0 | 0 | 0 | 0 | 0 | 0 | 0 | 0 | 0 | 1 | 0 | 1 |
| Cluster4677; Proteobac Deltaproteobacteria                    | 0 | 0 | 0 | 1 | 0 | 0 | 0 | 0 | 0 | 0 | 0 | 0 | 1 |
| Cluster4682;size=2                                            | 0 | 0 | 0 | 0 | 0 | 0 | 1 | 0 | 0 | 0 | 0 | 0 | 1 |
| Cluster4684; Proteobac Deltap Myxococcales                    | 1 | 0 | 0 | 0 | 0 | 0 | 0 | 0 | 0 | 0 | 0 | 0 | 1 |
| Cluster4687;size=6                                            | 0 | 0 | 0 | 0 | 0 | 1 | 0 | 0 | 0 | 0 | 0 | 0 | 1 |
| Cluster4690; Acidobact Acidobacteria_Gp3 Gp3                  | 0 | 0 | 0 | 0 | 0 | 0 | 0 | 0 | 0 | 0 | 1 | 0 | 1 |
| Cluster4691;size=1                                            | 0 | 0 | 0 | 0 | 0 | 0 | 0 | 0 | 0 | 0 | 0 | 1 | 1 |
| Cluster4700; Proteobac Betapr Burkholderiales                 | 0 | 0 | 0 | 0 | 0 | 0 | 0 | 1 | 0 | 0 | 0 | 0 | 1 |
| Cluster4709; Proteobac Deltap Myxc Polyangiaceae              | 0 | 0 | 0 | 0 | 0 | 0 | 0 | 1 | 0 | 0 | 0 | 0 | 1 |
| Cluster4714; Acidobact Acidobacteria_Gp1 Gp1                  | 0 | 1 | 0 | 0 | 0 | 0 | 0 | 0 | 0 | 0 | 0 | 0 | 1 |
| Cluster4715; Acidobact Acidobacteria_Gp2 Gp2                  | 0 | 0 | 0 | 0 | 0 | 1 | 0 | 0 | 0 | 0 | 0 | 0 | 1 |
| Cluster4722; Acidobact Acidobacteria_Gp10 Gp10                | 0 | 0 | 0 | 0 | 0 | 0 | 0 | 0 | 1 | 0 | 0 | 0 | 1 |



|                                                         |   |   |   |   |   |   |   |   |   |   |   |   |   |
|---------------------------------------------------------|---|---|---|---|---|---|---|---|---|---|---|---|---|
| Cluster4862; Planctom Planct Planct Planctomycetaceae   | 0 | 0 | 0 | 0 | 0 | 0 | 1 | 0 | 0 | 0 | 0 | 0 | 1 |
| Cluster4874; Acidobact Acidobacteria_Gp1                | 0 | 0 | 0 | 0 | 0 | 0 | 0 | 0 | 1 | 0 | 0 | 0 | 1 |
| Cluster4875;size=1                                      | 0 | 0 | 0 | 1 | 0 | 0 | 0 | 0 | 0 | 0 | 0 | 0 | 1 |
| Cluster4879; Proteobac Alphap Rhizc Bradyrh Agromonas   | 0 | 0 | 0 | 0 | 0 | 0 | 0 | 1 | 0 | 0 | 0 | 0 | 1 |
| Cluster4880; Planctomycetes                             | 0 | 1 | 0 | 0 | 0 | 0 | 0 | 0 | 0 | 0 | 0 | 0 | 1 |
| Cluster4887; Acidobact Acidobacteria_Gp2 Gp2            | 0 | 0 | 0 | 1 | 0 | 0 | 0 | 0 | 0 | 0 | 0 | 0 | 1 |
| Cluster4889; Verrucom Spartobacteria                    | 0 | 0 | 0 | 1 | 0 | 0 | 0 | 0 | 0 | 0 | 0 | 0 | 1 |
| Cluster4907; Acidobact Acidobacteria_Gp3 Gp3            | 0 | 0 | 1 | 0 | 0 | 0 | 0 | 0 | 0 | 0 | 0 | 0 | 1 |
| Cluster4910; Proteobac Deltaproteobacteria              | 0 | 0 | 0 | 0 | 0 | 0 | 1 | 0 | 0 | 0 | 0 | 0 | 1 |
| Cluster4913; Proteobac Alphap Rhizc Xantho Pseudolabrys | 0 | 0 | 0 | 0 | 0 | 0 | 0 | 0 | 0 | 1 | 0 | 0 | 1 |
| Cluster4926; Verrucom Subdivision3 Subdivision3_ξ       | 0 | 0 | 0 | 0 | 0 | 0 | 0 | 0 | 0 | 0 | 1 | 0 | 1 |
| Cluster4930; Proteobac Alphap Rhizobiales               | 0 | 0 | 0 | 1 | 0 | 0 | 0 | 0 | 0 | 0 | 0 | 0 | 1 |
| Cluster4943;size=1                                      | 0 | 1 | 0 | 0 | 0 | 0 | 0 | 0 | 0 | 0 | 0 | 0 | 1 |
| Cluster4944; Acidobact Acidobacteria_Gp2 Gp2            | 0 | 0 | 0 | 0 | 0 | 0 | 0 | 0 | 0 | 0 | 0 | 1 | 1 |
| Cluster4957; Acidobact Acidobacteria_Gp2 Gp2            | 0 | 1 | 0 | 0 | 0 | 0 | 0 | 0 | 0 | 0 | 0 | 0 | 1 |
| Cluster4962;size=7                                      | 0 | 0 | 0 | 0 | 1 | 0 | 0 | 0 | 0 | 0 | 0 | 0 | 1 |
| Cluster4963; Proteobac Gammaproteobacteria              | 0 | 0 | 0 | 0 | 0 | 0 | 0 | 0 | 0 | 0 | 1 | 0 | 1 |
| Cluster4964; Acidobact Acidobacteria_Gp2 Gp2            | 0 | 0 | 0 | 0 | 0 | 0 | 0 | 0 | 1 | 0 | 0 | 0 | 1 |
| Cluster4966; Verrucom Subdivision3 Subdivision3_ξ       | 0 | 0 | 0 | 0 | 0 | 1 | 0 | 0 | 0 | 0 | 0 | 0 | 1 |
| Cluster4967; Proteobac Alphap Caulc Caulobæ Caulobacter | 0 | 0 | 0 | 0 | 0 | 1 | 0 | 0 | 0 | 0 | 0 | 0 | 1 |
| Cluster4977; Proteobac Alphap Rhodospirillales          | 0 | 0 | 0 | 0 | 0 | 0 | 1 | 0 | 0 | 0 | 0 | 0 | 1 |
| Cluster4978; Planctomycetes                             | 0 | 0 | 0 | 0 | 0 | 0 | 0 | 0 | 0 | 1 | 0 | 0 | 1 |
| Cluster4983; Proteobac Alphap Rhizobiales               | 0 | 0 | 0 | 0 | 0 | 0 | 0 | 0 | 0 | 0 | 0 | 1 | 1 |
| Cluster4986; Proteobac Gamm Legio Coxiella Aquicella    | 0 | 0 | 0 | 1 | 0 | 0 | 0 | 0 | 0 | 0 | 0 | 0 | 1 |
| Cluster4989; Actinobac Actino Solirubrobacterales       | 0 | 0 | 1 | 0 | 0 | 0 | 0 | 0 | 0 | 0 | 0 | 0 | 1 |
| Cluster4994; Acidobact Acidobacteria_Gp2 Gp2            | 0 | 1 | 0 | 0 | 0 | 0 | 0 | 0 | 0 | 0 | 0 | 0 | 1 |
| Cluster4995; Acidobact Acidobacteria_Gp1 Gp1            | 0 | 0 | 0 | 0 | 0 | 0 | 0 | 0 | 0 | 0 | 1 | 0 | 1 |
| Cluster5002; Proteobac Alphap Rhizobiales               | 0 | 0 | 1 | 0 | 0 | 0 | 0 | 0 | 0 | 0 | 0 | 0 | 1 |
| Cluster5005; Actinobac Actino Actinomycetales           | 0 | 0 | 0 | 0 | 0 | 0 | 0 | 0 | 1 | 0 | 0 | 0 | 1 |







|                                                            |   |   |   |   |   |   |   |   |   |   |   |   |   |
|------------------------------------------------------------|---|---|---|---|---|---|---|---|---|---|---|---|---|
| Cluster5278;size=1                                         | 0 | 0 | 0 | 0 | 0 | 0 | 0 | 0 | 1 | 0 | 0 | 0 | 1 |
| Cluster5280;size=1                                         | 0 | 0 | 0 | 0 | 1 | 0 | 0 | 0 | 0 | 0 | 0 | 0 | 1 |
| Cluster5297; Acidobact Acidobacteria_Gp1                   | 0 | 0 | 0 | 0 | 0 | 0 | 0 | 0 | 0 | 0 | 1 | 0 | 1 |
| Cluster5299; Proteobac Deltap Myxc Cystobacteraceae        | 0 | 0 | 0 | 0 | 1 | 0 | 0 | 0 | 0 | 0 | 0 | 0 | 1 |
| Cluster5302;size=15                                        | 0 | 0 | 0 | 0 | 0 | 1 | 0 | 0 | 0 | 0 | 0 | 0 | 1 |
| Cluster5308; Acidobact Acidobacteria_Gp2 Gp2               | 0 | 0 | 0 | 0 | 0 | 1 | 0 | 0 | 0 | 0 | 0 | 0 | 1 |
| Cluster5316; Actinobac Actinol Actin Mycoba Mycobacteriur  | 0 | 0 | 0 | 0 | 0 | 1 | 0 | 0 | 0 | 0 | 0 | 0 | 1 |
| Cluster5321; Actinobac Actinol Actinomycetales             | 0 | 0 | 1 | 0 | 0 | 0 | 0 | 0 | 0 | 0 | 0 | 0 | 1 |
| Cluster5326;size=2                                         | 0 | 0 | 0 | 0 | 0 | 1 | 0 | 0 | 0 | 0 | 0 | 0 | 1 |
| Cluster5328; Acidobact Acidobacteria_Gp3 Gp3               | 0 | 0 | 0 | 0 | 0 | 0 | 1 | 0 | 0 | 0 | 0 | 0 | 1 |
| Cluster5338; Planctom Planct Planct Plancto Singulisphaera | 0 | 0 | 0 | 0 | 0 | 0 | 0 | 0 | 0 | 0 | 1 | 0 | 1 |
| Cluster5347; Proteobacteria                                | 0 | 0 | 0 | 0 | 0 | 0 | 0 | 0 | 0 | 0 | 1 | 0 | 1 |
| Cluster5352; Acidobact Acidobacteria_Gp1 Gp1               | 1 | 0 | 0 | 0 | 0 | 0 | 0 | 0 | 0 | 0 | 0 | 0 | 1 |
| Cluster5355; Proteobac Gamm Xanthomonadales                | 0 | 0 | 0 | 0 | 0 | 0 | 0 | 0 | 0 | 0 | 0 | 1 | 1 |
| Cluster5364; Proteobac Deltaproteobacteria                 | 0 | 1 | 0 | 0 | 0 | 0 | 0 | 0 | 0 | 0 | 0 | 0 | 1 |
| Cluster5368; Proteobac Alphaproteobacteria                 | 0 | 0 | 1 | 0 | 0 | 0 | 0 | 0 | 0 | 0 | 0 | 0 | 1 |
| Cluster5369; Proteobac Alphap Rhodospirillales             | 0 | 0 | 1 | 0 | 0 | 0 | 0 | 0 | 0 | 0 | 0 | 0 | 1 |
| Cluster5372;size=2                                         | 0 | 0 | 0 | 0 | 0 | 1 | 0 | 0 | 0 | 0 | 0 | 0 | 1 |
| Cluster5373; Acidobact Acidobacteria_Gp3 Gp3               | 0 | 0 | 0 | 1 | 0 | 0 | 0 | 0 | 0 | 0 | 0 | 0 | 1 |
| Cluster5377; Acidobact Acidobacteria_Gp2 Gp2               | 0 | 0 | 0 | 1 | 0 | 0 | 0 | 0 | 0 | 0 | 0 | 0 | 1 |
| Cluster5378;size=5                                         | 0 | 0 | 1 | 0 | 0 | 0 | 0 | 0 | 0 | 0 | 0 | 0 | 1 |
| Cluster5381; Acidobact Acidobacteria_Gp2 Gp2               | 0 | 0 | 0 | 0 | 0 | 0 | 0 | 0 | 0 | 0 | 1 | 0 | 1 |
| Cluster5384; Verrucom Subdivision3 Subdivision3_ξ          | 0 | 0 | 0 | 0 | 0 | 0 | 0 | 0 | 0 | 1 | 0 | 0 | 1 |
| Cluster5388; Acidobact Acidobacteria_Gp1                   | 0 | 0 | 0 | 1 | 0 | 0 | 0 | 0 | 0 | 0 | 0 | 0 | 1 |
| Cluster5392; Acidobact Acidobacteria_Gp10 Gp10             | 0 | 0 | 0 | 0 | 0 | 0 | 0 | 0 | 1 | 0 | 0 | 0 | 1 |
| Cluster5398; Proteobac Alphap Rhizc Hyphon Rhodoplanes     | 0 | 0 | 0 | 0 | 0 | 0 | 1 | 0 | 0 | 0 | 0 | 0 | 1 |
| Cluster5400;size=4                                         | 0 | 0 | 0 | 0 | 0 | 0 | 0 | 1 | 0 | 0 | 0 | 0 | 1 |
| Cluster5411; Proteobac Alphap Rhizc Bradyrh Bradyrhizobiur | 0 | 1 | 0 | 0 | 0 | 0 | 0 | 0 | 0 | 0 | 0 | 0 | 1 |
| Cluster5413; Proteobac Alphap Rhodospirillales             | 0 | 0 | 0 | 0 | 0 | 0 | 0 | 0 | 0 | 0 | 1 | 0 | 1 |

|                                                          |   |   |   |   |   |   |   |   |   |   |   |   |   |   |
|----------------------------------------------------------|---|---|---|---|---|---|---|---|---|---|---|---|---|---|
| Cluster5414;size=3                                       | 0 | 0 | 0 | 0 | 0 | 0 | 0 | 0 | 0 | 0 | 0 | 1 | 1 |   |
| Cluster5416; Actinobac Actinol Actinomycetales           | 0 | 0 | 0 | 0 | 0 | 0 | 0 | 0 | 0 | 0 | 0 | 1 | 0 | 1 |
| Cluster5420; Proteobac Alphaproteobacteria               | 0 | 0 | 0 | 1 | 0 | 0 | 0 | 0 | 0 | 0 | 0 | 0 | 0 | 1 |
| Cluster5432;size=1                                       | 0 | 0 | 0 | 0 | 0 | 1 | 0 | 0 | 0 | 0 | 0 | 0 | 0 | 1 |
| Cluster5434; Acidobact Acidobacteria_Gp2 Gp2             | 0 | 0 | 0 | 0 | 0 | 0 | 0 | 0 | 0 | 0 | 0 | 1 | 0 | 1 |
| Cluster5435;size=7                                       | 0 | 0 | 0 | 0 | 0 | 1 | 0 | 0 | 0 | 0 | 0 | 0 | 0 | 1 |
| Cluster5438; Planctom Planct Planct Planctomycetaceae    | 0 | 0 | 0 | 0 | 0 | 0 | 1 | 0 | 0 | 0 | 0 | 0 | 0 | 1 |
| Cluster5444; Acidobacteria                               | 0 | 0 | 0 | 0 | 0 | 0 | 0 | 1 | 0 | 0 | 0 | 0 | 0 | 1 |
| Cluster5447;size=4                                       | 1 | 0 | 0 | 0 | 0 | 0 | 0 | 0 | 0 | 0 | 0 | 0 | 0 | 1 |
| Cluster5452; Acidobact Acidobacteria_Gp6 Gp6             | 0 | 0 | 0 | 0 | 0 | 0 | 0 | 0 | 0 | 0 | 0 | 0 | 1 | 1 |
| Cluster5453; Proteobac Alphaproteobacteria               | 0 | 0 | 0 | 1 | 0 | 0 | 0 | 0 | 0 | 0 | 0 | 0 | 0 | 1 |
| Cluster5462; Proteobac Deltaproteobacteria               | 0 | 0 | 0 | 0 | 0 | 1 | 0 | 0 | 0 | 0 | 0 | 0 | 0 | 1 |
| Cluster5476; Proteobac Gamm Xantl Sinobac Steroidobacter | 0 | 0 | 0 | 0 | 0 | 0 | 0 | 0 | 0 | 1 | 0 | 0 | 0 | 1 |
| Cluster5484; Proteobacteria                              | 0 | 0 | 0 | 0 | 0 | 0 | 1 | 0 | 0 | 0 | 0 | 0 | 0 | 1 |
| Cluster5488;size=2                                       | 0 | 0 | 0 | 0 | 0 | 0 | 0 | 0 | 1 | 0 | 0 | 0 | 0 | 1 |
| Cluster5490;size=3                                       | 0 | 1 | 0 | 0 | 0 | 0 | 0 | 0 | 0 | 0 | 0 | 0 | 0 | 1 |
| Cluster5492; Acidobact Acidobacteria_Gp1                 | 0 | 0 | 1 | 0 | 0 | 0 | 0 | 0 | 0 | 0 | 0 | 0 | 0 | 1 |
| Cluster5495; Verrucom Subdivision3 Subdivision3_ξ        | 0 | 0 | 0 | 0 | 0 | 0 | 1 | 0 | 0 | 0 | 0 | 0 | 0 | 1 |
| Cluster5500; Proteobac Alpha Rhodospirillales            | 0 | 0 | 0 | 0 | 0 | 0 | 0 | 0 | 0 | 0 | 0 | 1 | 0 | 1 |
| Cluster5502; Proteobac Deltap Myxococcales               | 0 | 0 | 0 | 0 | 0 | 0 | 0 | 0 | 0 | 0 | 0 | 0 | 1 | 1 |
| Cluster5504; Acidobact Acidobacteria_Gp2 Gp2             | 0 | 0 | 0 | 0 | 0 | 0 | 0 | 0 | 0 | 0 | 0 | 0 | 1 | 1 |
| Cluster5512; Proteobacteria                              | 0 | 0 | 0 | 0 | 0 | 0 | 1 | 0 | 0 | 0 | 0 | 0 | 0 | 1 |
| Cluster5528; Actinobac Actinol Actinomycetales           | 0 | 0 | 0 | 0 | 0 | 0 | 1 | 0 | 0 | 0 | 0 | 0 | 0 | 1 |
| Cluster5531; Proteobac Gammaproteobacteria               | 1 | 0 | 0 | 0 | 0 | 0 | 0 | 0 | 0 | 0 | 0 | 0 | 0 | 1 |
| Cluster5542; Proteobac Gamm Xantl Sinobac Steroidobacter | 1 | 0 | 0 | 0 | 0 | 0 | 0 | 0 | 0 | 0 | 0 | 0 | 0 | 1 |
| Cluster5544; Proteobac Deltap Myxococcales               | 0 | 0 | 0 | 0 | 0 | 0 | 1 | 0 | 0 | 0 | 0 | 0 | 0 | 1 |
| Cluster5547; Acidobact Acidobacteria_Gp3                 | 0 | 0 | 0 | 0 | 0 | 0 | 0 | 0 | 1 | 0 | 0 | 0 | 0 | 1 |
| Cluster5551;size=4                                       | 0 | 0 | 0 | 0 | 0 | 1 | 0 | 0 | 0 | 0 | 0 | 0 | 0 | 1 |
| Cluster5571; Proteobac Deltaproteobacteria               | 0 | 0 | 0 | 0 | 0 | 0 | 0 | 1 | 0 | 0 | 0 | 0 | 0 | 1 |

|                                                      |                        |   |   |   |   |   |   |   |   |   |   |   |   |   |
|------------------------------------------------------|------------------------|---|---|---|---|---|---|---|---|---|---|---|---|---|
| Cluster5580; Acidobact Acidobacteria_Gp1             | Gp1                    | 0 | 0 | 0 | 0 | 0 | 0 | 0 | 0 | 1 | 0 | 0 | 0 | 1 |
| Cluster5583; Verrucom Subdivision3                   | Subdivision3_ε         | 0 | 0 | 0 | 1 | 0 | 0 | 0 | 0 | 0 | 0 | 0 | 0 | 1 |
| Cluster5584; Armatimonadetes                         | Armatimonade           | 0 | 0 | 0 | 1 | 0 | 0 | 0 | 0 | 0 | 0 | 0 | 0 | 1 |
| Cluster5590; Acidobact Acidobacteria_Gp2             | Gp2                    | 1 | 0 | 0 | 0 | 0 | 0 | 0 | 0 | 0 | 0 | 0 | 0 | 1 |
| Cluster5591; Proteobacteria                          |                        | 0 | 0 | 0 | 0 | 0 | 0 | 0 | 0 | 0 | 0 | 0 | 1 | 1 |
| Cluster5595; Proteobac Alphaproteobacteria           |                        | 0 | 0 | 0 | 0 | 1 | 0 | 0 | 0 | 0 | 0 | 0 | 0 | 1 |
| Cluster5598; Proteobac Alphap Rhizobiales            |                        | 1 | 0 | 0 | 0 | 0 | 0 | 0 | 0 | 0 | 0 | 0 | 0 | 1 |
| Cluster5608; Acidobact Acidobacteria_Gp2             | Gp2                    | 0 | 0 | 0 | 1 | 0 | 0 | 0 | 0 | 0 | 0 | 0 | 0 | 1 |
| Cluster5627; Firmicute: Bacilli                      | Bacilli Staphylo       | 0 | 0 | 0 | 0 | 0 | 0 | 0 | 1 | 0 | 0 | 0 | 0 | 1 |
| Cluster5629; Acidobacteria                           |                        | 0 | 0 | 0 | 1 | 0 | 0 | 0 | 0 | 0 | 0 | 0 | 0 | 1 |
| Cluster5635; Proteobac Alphap Rhizc Beijerinckiaceae |                        | 0 | 0 | 0 | 0 | 0 | 0 | 0 | 0 | 0 | 0 | 1 | 0 | 1 |
| Cluster5640; Verrucom Opitut: Opitu                  | Opituta Opitutus       | 1 | 0 | 0 | 0 | 0 | 0 | 0 | 0 | 0 | 0 | 0 | 0 | 1 |
| Cluster5645; Proteobacteria                          |                        | 1 | 0 | 0 | 0 | 0 | 0 | 0 | 0 | 0 | 0 | 0 | 0 | 1 |
| Cluster5646; Acidobact Acidobacteria_Gp2             | Gp2                    | 0 | 0 | 0 | 1 | 0 | 0 | 0 | 0 | 0 | 0 | 0 | 0 | 1 |
| Cluster5649; Acidobact Acidobacteria_Gp1             | Gp1                    | 0 | 0 | 0 | 0 | 0 | 0 | 0 | 0 | 1 | 0 | 0 | 0 | 1 |
| Cluster5653; Proteobac Alphap Caulc Caulob           | Phenylobacter          | 0 | 0 | 0 | 0 | 0 | 0 | 0 | 0 | 0 | 0 | 1 | 0 | 1 |
| Cluster5654; Proteobac Alphaproteobacteria           |                        | 0 | 0 | 0 | 0 | 0 | 0 | 1 | 0 | 0 | 0 | 0 | 0 | 1 |
| Cluster5655; size=6                                  |                        | 0 | 0 | 0 | 0 | 0 | 1 | 0 | 0 | 0 | 0 | 0 | 0 | 1 |
| Cluster5659; Proteobac Gamm Xantl                    | Sinobac Steroidobacter | 0 | 0 | 0 | 0 | 0 | 0 | 1 | 0 | 0 | 0 | 0 | 0 | 1 |
| Cluster5665; Actinobac Actinol                       | Actinomycetales        | 0 | 0 | 0 | 1 | 0 | 0 | 0 | 0 | 0 | 0 | 0 | 0 | 1 |
| Cluster5668; Acidobact Acidobacteria_Gp3             | Gp3                    | 0 | 0 | 0 | 0 | 0 | 0 | 0 | 1 | 0 | 0 | 0 | 0 | 1 |
| Cluster5678; Proteobac Alphap Rhodospirillales       |                        | 0 | 0 | 0 | 0 | 0 | 0 | 0 | 0 | 0 | 0 | 0 | 1 | 1 |
| Cluster5685; Proteobac Alphap Rhizc Bradyrh          | Bradyrhizobiur         | 0 | 0 | 0 | 0 | 0 | 0 | 1 | 0 | 0 | 0 | 0 | 0 | 1 |
| Cluster5688; size=1                                  |                        | 0 | 0 | 0 | 0 | 0 | 0 | 0 | 0 | 0 | 0 | 1 | 0 | 1 |
| Cluster5691; Planctomycetes                          |                        | 0 | 0 | 0 | 0 | 0 | 0 | 0 | 0 | 0 | 0 | 0 | 1 | 1 |
| Cluster5693; Proteobac Alphap Rhodospirillales       |                        | 1 | 0 | 0 | 0 | 0 | 0 | 0 | 0 | 0 | 0 | 0 | 0 | 1 |
| Cluster5696; Acidobact Acidobacteria_Gp3             | Gp3                    | 0 | 0 | 0 | 0 | 0 | 0 | 0 | 0 | 0 | 0 | 1 | 0 | 1 |
| Cluster5699; Planctom Planct                         | Planct Singulisphaera  | 0 | 0 | 0 | 0 | 1 | 0 | 0 | 0 | 0 | 0 | 0 | 0 | 1 |
| Cluster5707; Acidobact Acidobacteria_Gp1             | Terriglobus            | 0 | 0 | 0 | 0 | 0 | 0 | 0 | 1 | 0 | 0 | 0 | 0 | 1 |

|                                                             |   |   |   |   |   |   |   |   |   |   |   |   |   |
|-------------------------------------------------------------|---|---|---|---|---|---|---|---|---|---|---|---|---|
| Cluster5717; Acidobact Acidobacteria_Gp2 Gp2                | 0 | 0 | 0 | 0 | 0 | 0 | 0 | 0 | 0 | 1 | 0 | 0 | 1 |
| Cluster5721; Verrucom Opitut; Opitu Opituta Opitutus        | 0 | 1 | 0 | 0 | 0 | 0 | 0 | 0 | 0 | 0 | 0 | 0 | 1 |
| Cluster5722; Acidobact Acidobacteria_Gp2 Gp2                | 0 | 0 | 0 | 1 | 0 | 0 | 0 | 0 | 0 | 0 | 0 | 0 | 1 |
| Cluster5724; size=2                                         | 1 | 0 | 0 | 0 | 0 | 0 | 0 | 0 | 0 | 0 | 0 | 0 | 1 |
| Cluster5725; Proteobac Alphap Rhizc Bradyrh Agromonas       | 0 | 0 | 0 | 0 | 0 | 0 | 0 | 1 | 0 | 0 | 0 | 0 | 1 |
| Cluster5726; Planctom Planct; Planc Plancto Planctomyces    | 0 | 0 | 0 | 0 | 0 | 1 | 0 | 0 | 0 | 0 | 0 | 0 | 1 |
| Cluster5728; size=3                                         | 0 | 0 | 0 | 0 | 0 | 0 | 1 | 0 | 0 | 0 | 0 | 0 | 1 |
| Cluster5734; Actinobac Actinobacteria                       | 0 | 0 | 0 | 0 | 0 | 1 | 0 | 0 | 0 | 0 | 0 | 0 | 1 |
| Cluster5737; Acidobact Acidobacteria_Gp1                    | 0 | 0 | 0 | 0 | 1 | 0 | 0 | 0 | 0 | 0 | 0 | 0 | 1 |
| Cluster5739; Proteobac Betapr Burkl Oxalobacteraceae        | 1 | 0 | 0 | 0 | 0 | 0 | 0 | 0 | 0 | 0 | 0 | 0 | 1 |
| Cluster5740; Acidobact Acidobacteria_Gp1 Gp1                | 0 | 0 | 0 | 0 | 0 | 0 | 0 | 0 | 0 | 0 | 1 | 0 | 1 |
| Cluster5741; size=2                                         | 1 | 0 | 0 | 0 | 0 | 0 | 0 | 0 | 0 | 0 | 0 | 0 | 1 |
| Cluster5744; size=1                                         | 0 | 0 | 0 | 0 | 0 | 0 | 1 | 0 | 0 | 0 | 0 | 0 | 1 |
| Cluster5750; Verrucom Subdivision3 Subdivision3_ξ           | 0 | 0 | 0 | 0 | 1 | 0 | 0 | 0 | 0 | 0 | 0 | 0 | 1 |
| Cluster5756; Proteobac Alphap Rhod Acetobacteraceae         | 0 | 0 | 0 | 0 | 0 | 0 | 0 | 0 | 0 | 1 | 0 | 0 | 1 |
| Cluster5759; Acidobact Acidobacteria_Gp2 Gp2                | 0 | 0 | 1 | 0 | 0 | 0 | 0 | 0 | 0 | 0 | 0 | 0 | 1 |
| Cluster5763; Actinobac Actino Actinomycetales               | 0 | 0 | 0 | 0 | 0 | 0 | 0 | 0 | 1 | 0 | 0 | 0 | 1 |
| Cluster5768; TM7 TM7_genera_i                               | 0 | 0 | 0 | 0 | 0 | 0 | 0 | 0 | 0 | 0 | 1 | 0 | 1 |
| Cluster5773; size=1                                         | 0 | 0 | 0 | 0 | 0 | 0 | 0 | 0 | 0 | 0 | 0 | 1 | 1 |
| Cluster5774; Acidobact Acidobacteria_Gp3                    | 0 | 0 | 0 | 0 | 0 | 1 | 0 | 0 | 0 | 0 | 0 | 0 | 1 |
| Cluster5778; Acidobact Acidobacteria_Gp1 Terriglobus        | 0 | 0 | 0 | 0 | 1 | 0 | 0 | 0 | 0 | 0 | 0 | 0 | 1 |
| Cluster5779; Acidobact Acidobacteria_Gp2 Gp2                | 0 | 0 | 0 | 0 | 0 | 0 | 1 | 0 | 0 | 0 | 0 | 0 | 1 |
| Cluster5790; size=1                                         | 0 | 0 | 0 | 0 | 0 | 0 | 1 | 0 | 0 | 0 | 0 | 0 | 1 |
| Cluster5793; Proteobac Alphap Rhod Rhodospirillaceae        | 0 | 0 | 0 | 0 | 0 | 0 | 0 | 0 | 0 | 0 | 1 | 0 | 1 |
| Cluster5813; Acidobact Acidobacteria_Gp2 Gp2                | 1 | 0 | 0 | 0 | 0 | 0 | 0 | 0 | 0 | 0 | 0 | 0 | 1 |
| Cluster5816; Acidobact Acidobacteria_Gp2 Gp2                | 0 | 0 | 0 | 0 | 0 | 0 | 0 | 1 | 0 | 0 | 0 | 0 | 1 |
| Cluster5837; Acidobact Acidobacteria_Gp1 Terriglobus        | 0 | 0 | 0 | 0 | 0 | 0 | 0 | 1 | 0 | 0 | 0 | 0 | 1 |
| Cluster5839; Acidobact Acidobacteria_Gp1                    | 0 | 0 | 0 | 0 | 0 | 0 | 0 | 0 | 0 | 1 | 0 | 0 | 1 |
| Cluster5840; Actinobac Actino Acidi Acidimii Aciditerrimona | 0 | 0 | 0 | 0 | 0 | 0 | 1 | 0 | 0 | 0 | 0 | 0 | 1 |





|                                                               |   |   |   |   |   |   |   |   |   |   |   |   |   |
|---------------------------------------------------------------|---|---|---|---|---|---|---|---|---|---|---|---|---|
| Cluster6122; Acidobact Acidobacteria_Gp2 Gp2                  | 0 | 0 | 0 | 0 | 0 | 1 | 0 | 0 | 0 | 0 | 0 | 0 | 1 |
| Cluster6123;size=1                                            | 0 | 0 | 0 | 1 | 0 | 0 | 0 | 0 | 0 | 0 | 0 | 0 | 1 |
| Cluster6124;size=1                                            | 0 | 0 | 0 | 0 | 0 | 1 | 0 | 0 | 0 | 0 | 0 | 0 | 1 |
| Cluster6128; Acidobact Acidobacteria_Gp1 Terriglobus          | 0 | 0 | 0 | 0 | 1 | 0 | 0 | 0 | 0 | 0 | 0 | 0 | 1 |
| Cluster6131; Actinobac Actinol Actinomycetales                | 1 | 0 | 0 | 0 | 0 | 0 | 0 | 0 | 0 | 0 | 0 | 0 | 1 |
| Cluster6132; Acidobact Acidobacteria_Gp2 Gp2                  | 0 | 0 | 0 | 0 | 0 | 0 | 1 | 0 | 0 | 0 | 0 | 0 | 1 |
| Cluster6140;size=1                                            | 0 | 0 | 0 | 1 | 0 | 0 | 0 | 0 | 0 | 0 | 0 | 0 | 1 |
| Cluster6144; Proteobac Alphap Rhizc Xantho Pseudolabrys       | 0 | 0 | 0 | 0 | 0 | 0 | 0 | 0 | 0 | 0 | 1 | 0 | 1 |
| Cluster6157; Elusimicrc Elusim Elusir Elusimic Elusimicrobiun | 1 | 0 | 0 | 0 | 0 | 0 | 0 | 0 | 0 | 0 | 0 | 0 | 1 |
| Cluster6166; Proteobac Alphap Rhizobiales                     | 0 | 0 | 0 | 0 | 0 | 0 | 1 | 0 | 0 | 0 | 0 | 0 | 1 |
| Cluster6176;size=1                                            | 0 | 0 | 0 | 0 | 0 | 0 | 0 | 0 | 0 | 0 | 1 | 0 | 1 |
| Cluster6184;size=1                                            | 0 | 0 | 0 | 0 | 0 | 0 | 0 | 1 | 0 | 0 | 0 | 0 | 1 |
| Cluster6191; Proteobac Alphaproteobacteria                    | 1 | 0 | 0 | 0 | 0 | 0 | 0 | 0 | 0 | 0 | 0 | 0 | 1 |
| Cluster6199;size=6                                            | 0 | 0 | 0 | 0 | 0 | 0 | 0 | 0 | 0 | 0 | 1 | 0 | 1 |
| Cluster6201; Acidobact Acidobacteria_Gp2 Gp2                  | 0 | 0 | 0 | 0 | 0 | 1 | 0 | 0 | 0 | 0 | 0 | 0 | 1 |
| Cluster6204; Proteobac Alphap Rhodospirillales                | 0 | 0 | 0 | 0 | 0 | 1 | 0 | 0 | 0 | 0 | 0 | 0 | 1 |
| Cluster6206; Proteobacteria                                   | 0 | 0 | 0 | 0 | 0 | 0 | 0 | 1 | 0 | 0 | 0 | 0 | 1 |
| Cluster6211; Acidobact Acidobacteria_Gp1 Edaphobacter         | 0 | 0 | 0 | 0 | 0 | 0 | 0 | 0 | 1 | 0 | 0 | 0 | 1 |
| Cluster6212; Proteobac Alphap Rhizc Xantho Pseudolabrys       | 0 | 0 | 0 | 1 | 0 | 0 | 0 | 0 | 0 | 0 | 0 | 0 | 1 |
| Cluster6225; Proteobac Alphap Rhodospirillales                | 0 | 0 | 0 | 0 | 0 | 0 | 0 | 0 | 0 | 0 | 1 | 0 | 1 |
| Cluster6229; Acidobact Acidobacteria_Gp1                      | 1 | 0 | 0 | 0 | 0 | 0 | 0 | 0 | 0 | 0 | 0 | 0 | 1 |
| Cluster6239; Proteobac Alphap Rhizc Bradyrhizobiaceae         | 0 | 0 | 0 | 1 | 0 | 0 | 0 | 0 | 0 | 0 | 0 | 0 | 1 |
| Cluster6243;size=2                                            | 0 | 0 | 0 | 0 | 0 | 0 | 0 | 1 | 0 | 0 | 0 | 0 | 1 |
| Cluster6252; Proteobac Alphap Rhodospirillales                | 0 | 0 | 1 | 0 | 0 | 0 | 0 | 0 | 0 | 0 | 0 | 0 | 1 |
| Cluster6255; Acidobact Acidobacteria_Gp3                      | 0 | 1 | 0 | 0 | 0 | 0 | 0 | 0 | 0 | 0 | 0 | 0 | 1 |
| Cluster6274;size=2                                            | 0 | 0 | 0 | 0 | 0 | 0 | 0 | 1 | 0 | 0 | 0 | 0 | 1 |
| Cluster6280; Acidobact Acidobacteria_Gp1                      | 0 | 0 | 0 | 0 | 0 | 0 | 0 | 0 | 0 | 0 | 0 | 1 | 1 |
| Cluster6281; Verrucom Subdivision3 Subdivision3_ξ             | 0 | 0 | 0 | 0 | 0 | 0 | 0 | 0 | 0 | 0 | 0 | 1 | 1 |
| Cluster6282;size=14                                           | 0 | 0 | 0 | 0 | 0 | 1 | 0 | 0 | 0 | 0 | 0 | 0 | 1 |





|                                                            |   |   |   |   |   |   |   |   |   |   |   |   |   |
|------------------------------------------------------------|---|---|---|---|---|---|---|---|---|---|---|---|---|
| Cluster6458; Actinobac Actinol Actin Pseudonocardiaecae    | 0 | 0 | 0 | 0 | 0 | 0 | 0 | 0 | 0 | 0 | 1 | 0 | 1 |
| Cluster6462;size=1                                         | 0 | 0 | 0 | 1 | 0 | 0 | 0 | 0 | 0 | 0 | 0 | 0 | 1 |
| Cluster6470;size=2                                         | 0 | 0 | 1 | 0 | 0 | 0 | 0 | 0 | 0 | 0 | 0 | 0 | 1 |
| Cluster6473;size=1                                         | 0 | 0 | 0 | 0 | 0 | 0 | 1 | 0 | 0 | 0 | 0 | 0 | 1 |
| Cluster6474; Verrucom Subdivision3 Subdivision3_ξ          | 0 | 0 | 0 | 1 | 0 | 0 | 0 | 0 | 0 | 0 | 0 | 0 | 1 |
| Cluster6482; Acidobact Acidobacteria_Gp2 Gp2               | 0 | 0 | 1 | 0 | 0 | 0 | 0 | 0 | 0 | 0 | 0 | 0 | 1 |
| Cluster6487; Acidobact Acidobacteria_Gp2 Gp2               | 0 | 0 | 0 | 0 | 0 | 0 | 0 | 0 | 0 | 0 | 0 | 1 | 1 |
| Cluster6492; Verrucom Subdivision3 Subdivision3_ξ          | 0 | 0 | 0 | 0 | 0 | 0 | 0 | 0 | 0 | 0 | 0 | 1 | 1 |
| Cluster6494; Verrucom Opitut: Opitu Opituta Opitutus       | 0 | 1 | 0 | 0 | 0 | 0 | 0 | 0 | 0 | 0 | 0 | 0 | 1 |
| Cluster6495; Verrucom Spartobacteria Spartobacteria        | 0 | 0 | 0 | 0 | 0 | 0 | 1 | 0 | 0 | 0 | 0 | 0 | 1 |
| Cluster6504; Acidobact Acidobacteria_Gp1 Gp1               | 0 | 0 | 0 | 0 | 0 | 0 | 0 | 0 | 0 | 0 | 0 | 1 | 1 |
| Cluster6506; Proteobac Deltap Myxococcales                 | 0 | 0 | 0 | 1 | 0 | 0 | 0 | 0 | 0 | 0 | 0 | 0 | 1 |
| Cluster6507; Acidobact Acidobacteria_Gp1                   | 0 | 0 | 1 | 0 | 0 | 0 | 0 | 0 | 0 | 0 | 0 | 0 | 1 |
| Cluster6512; Proteobac Alphap Rhizc Bradyrh Bradyrhizobiur | 0 | 0 | 0 | 0 | 0 | 0 | 0 | 0 | 0 | 0 | 0 | 1 | 1 |
| Cluster6518;size=1                                         | 0 | 0 | 0 | 0 | 0 | 0 | 0 | 1 | 0 | 0 | 0 | 0 | 1 |
| Cluster6529; Proteobac Deltap Myxococcales                 | 0 | 0 | 0 | 0 | 0 | 0 | 1 | 0 | 0 | 0 | 0 | 0 | 1 |
| Cluster6537; Armatimonadetes Armatimonade                  | 0 | 0 | 0 | 0 | 0 | 0 | 1 | 0 | 0 | 0 | 0 | 0 | 1 |
| Cluster6543; Proteobac Deltap Bdell Bdellovi Vampirovibrio | 0 | 0 | 0 | 0 | 0 | 0 | 0 | 0 | 0 | 0 | 0 | 1 | 1 |
| Cluster6544; Gemmatir Gemm Geml Gemma Gemmatimonad         | 0 | 0 | 0 | 1 | 0 | 0 | 0 | 0 | 0 | 0 | 0 | 0 | 1 |
| Cluster6551; Acidobact Acidobacteria_Gp2 Gp2               | 0 | 0 | 0 | 0 | 0 | 0 | 1 | 0 | 0 | 0 | 0 | 0 | 1 |
| Cluster6555; Verrucom Opitut: Opitu Opituta Opitutus       | 1 | 0 | 0 | 0 | 0 | 0 | 0 | 0 | 0 | 0 | 0 | 0 | 1 |
| Cluster6565;size=2                                         | 0 | 1 | 0 | 0 | 0 | 0 | 0 | 0 | 0 | 0 | 0 | 0 | 1 |
| Cluster6570; Proteobac Deltap Myxococcales                 | 1 | 0 | 0 | 0 | 0 | 0 | 0 | 0 | 0 | 0 | 0 | 0 | 1 |
| Cluster6576; Verrucom Subdivision3 Subdivision3_ξ          | 0 | 0 | 0 | 0 | 0 | 0 | 1 | 0 | 0 | 0 | 0 | 0 | 1 |
| Cluster6579; Acidobact Acidobacteria_Gp1 Gp1               | 0 | 0 | 0 | 0 | 0 | 0 | 0 | 0 | 0 | 0 | 1 | 0 | 1 |
| Cluster6586; Proteobac Alphaproteobacteria                 | 0 | 0 | 0 | 0 | 0 | 0 | 0 | 0 | 1 | 0 | 0 | 0 | 1 |
| Cluster6599; Verrucom Subdivision3 Subdivision3_ξ          | 1 | 0 | 0 | 0 | 0 | 0 | 0 | 0 | 0 | 0 | 0 | 0 | 1 |
| Cluster6600; Firmicute: Negati Selen Veillonellaceae       | 0 | 0 | 0 | 1 | 0 | 0 | 0 | 0 | 0 | 0 | 0 | 0 | 1 |
| Cluster6623;size=4                                         | 0 | 0 | 0 | 0 | 0 | 1 | 0 | 0 | 0 | 0 | 0 | 0 | 1 |



|                                                               |   |   |   |   |   |   |   |   |   |   |   |   |   |
|---------------------------------------------------------------|---|---|---|---|---|---|---|---|---|---|---|---|---|
| Cluster6768; Proteobacteria                                   | 0 | 0 | 0 | 0 | 0 | 0 | 0 | 0 | 0 | 0 | 1 | 0 | 1 |
| Cluster6769; Proteobac Alphap Rhizc Bradyrhizobiaceae         | 0 | 0 | 0 | 0 | 0 | 0 | 0 | 0 | 0 | 0 | 0 | 1 | 1 |
| Cluster6771; Actinobac Actinol Soliric Conexib Conexibacter   | 0 | 0 | 0 | 0 | 0 | 0 | 0 | 0 | 0 | 0 | 1 | 0 | 1 |
| Cluster6772; Proteobac Alphap Rhod Acetobac Acidisphaera      | 0 | 0 | 0 | 0 | 0 | 0 | 0 | 1 | 0 | 0 | 0 | 0 | 1 |
| Cluster6775; Acidobact Acidobacteria_Gp1 Gp1                  | 0 | 0 | 0 | 0 | 1 | 0 | 0 | 0 | 0 | 0 | 0 | 0 | 1 |
| Cluster6787; Proteobac Alphap Rhodospirillales                | 0 | 0 | 1 | 0 | 0 | 0 | 0 | 0 | 0 | 0 | 0 | 0 | 1 |
| Cluster6796; Actinobac Actinol Acidi Acidimii Aciditerrimonas | 0 | 0 | 0 | 0 | 0 | 0 | 0 | 0 | 0 | 0 | 1 | 0 | 1 |
| Cluster6797; Proteobac Alphap Rhizc Xantho Labrys             | 0 | 0 | 0 | 0 | 0 | 0 | 0 | 1 | 0 | 0 | 0 | 0 | 1 |
| Cluster6800; Acidobact Acidobacteria_Gp3 Gp3                  | 0 | 0 | 0 | 0 | 0 | 0 | 1 | 0 | 0 | 0 | 0 | 0 | 1 |
| Cluster6809; Proteobac Alphap Rhod Acetobacteraceae           | 0 | 0 | 0 | 0 | 1 | 0 | 0 | 0 | 0 | 0 | 0 | 0 | 1 |
| Cluster6810; Proteobac Alphap Alphaproteob Rhizomicrobiu      | 0 | 0 | 1 | 0 | 0 | 0 | 0 | 0 | 0 | 0 | 0 | 0 | 1 |
| Cluster6813; Proteobac Alphap Rhizc Bradyrhizobiaceae         | 0 | 0 | 0 | 0 | 0 | 0 | 0 | 0 | 0 | 0 | 1 | 0 | 1 |
| Cluster6818; Acidobact Acidobacteria_Gp2 Gp2                  | 0 | 0 | 0 | 0 | 0 | 0 | 0 | 1 | 0 | 0 | 0 | 0 | 1 |
| Cluster6823; Proteobac Alphaproteobacteria                    | 0 | 1 | 0 | 0 | 0 | 0 | 0 | 0 | 0 | 0 | 0 | 0 | 1 |
| Cluster6824; Chloroflex Ktedor Ktedonobacterales              | 0 | 0 | 0 | 0 | 0 | 0 | 0 | 1 | 0 | 0 | 0 | 0 | 1 |
| Cluster6825; Proteobac Alphap Rhodospirillales                | 0 | 0 | 0 | 0 | 0 | 0 | 0 | 1 | 0 | 0 | 0 | 0 | 1 |
| Cluster6834; Acidobact Acidobacteria_Gp10 Gp10                | 1 | 0 | 0 | 0 | 0 | 0 | 0 | 0 | 0 | 0 | 0 | 0 | 1 |
| Cluster6835; Proteobac Alphap Rhodospirillales                | 0 | 0 | 0 | 0 | 0 | 0 | 0 | 0 | 0 | 0 | 1 | 0 | 1 |
| Cluster6839; Proteobacteria                                   | 0 | 0 | 0 | 0 | 1 | 0 | 0 | 0 | 0 | 0 | 0 | 0 | 1 |
| Cluster6843; Acidobact Acidobacteria_Gp10 Gp10                | 0 | 0 | 0 | 0 | 1 | 0 | 0 | 0 | 0 | 0 | 0 | 0 | 1 |
| Cluster6844;size=1                                            | 0 | 0 | 0 | 0 | 1 | 0 | 0 | 0 | 0 | 0 | 0 | 0 | 1 |
| Cluster6856; Actinobac Actinol Acidi Acidimii Aciditerrimonas | 0 | 0 | 0 | 0 | 0 | 0 | 0 | 0 | 0 | 0 | 1 | 0 | 1 |
| Cluster6863;size=1                                            | 0 | 0 | 0 | 0 | 0 | 0 | 1 | 0 | 0 | 0 | 0 | 0 | 1 |
| Cluster6864; Firmicute Bacilli Bacill Bacillac Falsibacillus  | 0 | 0 | 0 | 0 | 0 | 0 | 1 | 0 | 0 | 0 | 0 | 0 | 1 |
| Cluster6870; Acidobact Acidobacteria_Gp2 Gp2                  | 0 | 0 | 0 | 0 | 0 | 0 | 1 | 0 | 0 | 0 | 0 | 0 | 1 |
| Cluster6879; Actinobac Actinol Actinomycetales                | 0 | 0 | 0 | 0 | 0 | 0 | 1 | 0 | 0 | 0 | 0 | 0 | 1 |
| Cluster6889;size=1                                            | 0 | 0 | 0 | 0 | 0 | 0 | 1 | 0 | 0 | 0 | 0 | 0 | 1 |
| Cluster6891; Proteobac Betapr Rhod Rhodocyclaceae             | 0 | 0 | 1 | 0 | 0 | 0 | 0 | 0 | 0 | 0 | 0 | 0 | 1 |
| Cluster6892;size=3                                            | 0 | 0 | 0 | 0 | 0 | 0 | 0 | 0 | 0 | 0 | 1 | 0 | 1 |



|                                                               |   |   |   |   |   |   |   |   |   |   |   |   |   |
|---------------------------------------------------------------|---|---|---|---|---|---|---|---|---|---|---|---|---|
| Cluster7014; Proteobacteria                                   | 0 | 0 | 0 | 1 | 0 | 0 | 0 | 0 | 0 | 0 | 0 | 0 | 1 |
| Cluster7015; Acidobact Acidobacteria_Gp3                      | 0 | 0 | 0 | 0 | 0 | 0 | 0 | 0 | 0 | 0 | 0 | 1 | 1 |
| Cluster7016; Proteobac Deltap Bdell Bdellovi Vampirovibrio    | 0 | 0 | 0 | 0 | 0 | 0 | 0 | 0 | 0 | 1 | 0 | 0 | 1 |
| Cluster7018; Proteobac Alphap Caulc Caulobæ Phenylobacter     | 0 | 0 | 0 | 0 | 0 | 0 | 0 | 0 | 0 | 0 | 1 | 0 | 1 |
| Cluster7028; Gemmatir Gemm Gemı Gemma Gemmatimonæ             | 0 | 0 | 0 | 0 | 1 | 0 | 0 | 0 | 0 | 0 | 0 | 0 | 1 |
| Cluster7032; Acidobact Acidobacteria_Gp1 Gp1                  | 0 | 0 | 0 | 0 | 0 | 0 | 0 | 0 | 0 | 0 | 0 | 1 | 1 |
| Cluster7034; Acidobact Acidobacteria_Gp3 Bryobacter           | 0 | 0 | 0 | 0 | 1 | 0 | 0 | 0 | 0 | 0 | 0 | 0 | 1 |
| Cluster7036; Acidobact Acidobacteria_Gp1                      | 0 | 0 | 0 | 0 | 0 | 0 | 0 | 1 | 0 | 0 | 0 | 0 | 1 |
| Cluster7039; Proteobac Alphap Rhizc Xanthol Labrys            | 0 | 1 | 0 | 0 | 0 | 0 | 0 | 0 | 0 | 0 | 0 | 0 | 1 |
| Cluster7040; Actinobac Actinol Actinomycetales                | 0 | 0 | 0 | 0 | 0 | 0 | 0 | 0 | 0 | 1 | 0 | 0 | 1 |
| Cluster7043; Actinobac Actinobacteria                         | 0 | 0 | 0 | 0 | 1 | 0 | 0 | 0 | 0 | 0 | 0 | 0 | 1 |
| Cluster7046; Proteobac Betapr Burkl Burkholderiaceae          | 0 | 0 | 0 | 0 | 0 | 0 | 0 | 0 | 0 | 1 | 0 | 0 | 1 |
| Cluster7050; Actinobac Actinol Actinomycetales                | 0 | 1 | 0 | 0 | 0 | 0 | 0 | 0 | 0 | 0 | 0 | 0 | 1 |
| Cluster7069; Armatimc Armati Arma Armatin Armatimonas/        | 0 | 0 | 0 | 0 | 1 | 0 | 0 | 0 | 0 | 0 | 0 | 0 | 1 |
| Cluster7083; Proteobac Alphap Rhizc Beijerinckiaceae          | 0 | 0 | 0 | 0 | 0 | 0 | 0 | 0 | 0 | 0 | 0 | 1 | 1 |
| Cluster7084; Chloroflex Ktedonobacteria                       | 0 | 0 | 0 | 0 | 0 | 0 | 1 | 0 | 0 | 0 | 0 | 0 | 1 |
| Cluster7088; Proteobac Gamm Xantl Xanthor Pseudoxanthor       | 0 | 0 | 0 | 0 | 0 | 0 | 0 | 1 | 0 | 0 | 0 | 0 | 1 |
| Cluster7089; Proteobac Alphaproteobacteria                    | 0 | 0 | 0 | 0 | 0 | 0 | 0 | 1 | 0 | 0 | 0 | 0 | 1 |
| Cluster7105; Proteobac Alphap Rhizc Bradyrh Bradyrhizobiur    | 0 | 0 | 1 | 0 | 0 | 0 | 0 | 0 | 0 | 0 | 0 | 0 | 1 |
| Cluster7110; Acidobact Acidobacteria_Gp1                      | 0 | 0 | 0 | 0 | 0 | 0 | 0 | 0 | 0 | 0 | 0 | 1 | 1 |
| Cluster7111; Proteobac Alphaproteobacteria                    | 0 | 0 | 0 | 0 | 0 | 0 | 0 | 0 | 0 | 0 | 1 | 0 | 1 |
| Cluster7123; Chlamydi; Chlamy Chlar Parachlamydiaceae         | 0 | 0 | 0 | 0 | 0 | 0 | 1 | 0 | 0 | 0 | 0 | 0 | 1 |
| Cluster7124; Verrucomicrobia                                  | 0 | 0 | 0 | 0 | 1 | 0 | 0 | 0 | 0 | 0 | 0 | 0 | 1 |
| Cluster7134; Chlamydi; Chlamy Chlamydiales                    | 0 | 0 | 0 | 0 | 0 | 0 | 1 | 0 | 0 | 0 | 0 | 0 | 1 |
| Cluster7138; Acidobact Acidobacteria_Gp3 Gp3                  | 0 | 0 | 0 | 0 | 0 | 0 | 0 | 1 | 0 | 0 | 0 | 0 | 1 |
| Cluster7139; Proteobac Alphap Rhizc Bradyrh Agromonas         | 0 | 0 | 1 | 0 | 0 | 0 | 0 | 0 | 0 | 0 | 0 | 0 | 1 |
| Cluster7140; Actinobac Actinol Solirı Solirubr Solirubrobacte | 0 | 0 | 0 | 0 | 0 | 0 | 0 | 0 | 0 | 0 | 1 | 0 | 1 |
| Cluster7143; Acidobact Acidobacteria_Gp1                      | 0 | 0 | 0 | 1 | 0 | 0 | 0 | 0 | 0 | 0 | 0 | 0 | 1 |
| Cluster7144; Armatimc Chthor Chthı Chthonı Chthonomona:       | 0 | 0 | 0 | 0 | 0 | 0 | 0 | 0 | 0 | 0 | 1 | 0 | 1 |

|                                                            |   |   |   |   |   |   |   |   |   |   |   |   |   |
|------------------------------------------------------------|---|---|---|---|---|---|---|---|---|---|---|---|---|
| Cluster7147; Acidobact Acidobacteria_Gp1                   | 0 | 0 | 0 | 0 | 0 | 0 | 0 | 0 | 0 | 0 | 0 | 1 | 1 |
| Cluster7149; size=16                                       | 0 | 1 | 0 | 0 | 0 | 0 | 0 | 0 | 0 | 0 | 0 | 0 | 1 |
| Cluster7151; Proteobac Alphap Rhodospirillales             | 0 | 0 | 0 | 0 | 1 | 0 | 0 | 0 | 0 | 0 | 0 | 0 | 1 |
| Cluster7155; Verrucom Subdivision3 Subdivision3_ξ          | 0 | 0 | 0 | 0 | 1 | 0 | 0 | 0 | 0 | 0 | 0 | 0 | 1 |
| Cluster7157; Acidobact Acidobacteria_Gp3 Gp3               | 0 | 0 | 1 | 0 | 0 | 0 | 0 | 0 | 0 | 0 | 0 | 0 | 1 |
| Cluster7158; Proteobac Deltaproteobacteria                 | 0 | 0 | 0 | 0 | 0 | 0 | 0 | 0 | 1 | 0 | 0 | 0 | 1 |
| Cluster7160; Proteobac Alphaproteobacteria                 | 0 | 0 | 0 | 1 | 0 | 0 | 0 | 0 | 0 | 0 | 0 | 0 | 1 |
| Cluster7162; Proteobac Alphap Rhodospirillales             | 0 | 0 | 0 | 0 | 1 | 0 | 0 | 0 | 0 | 0 | 0 | 0 | 1 |
| Cluster7164; Armatimc Chthor Chtho Chthono Chthonomona     | 0 | 0 | 0 | 0 | 0 | 0 | 1 | 0 | 0 | 0 | 0 | 0 | 1 |
| Cluster7169; size=1                                        | 0 | 0 | 1 | 0 | 0 | 0 | 0 | 0 | 0 | 0 | 0 | 0 | 1 |
| Cluster7176; Proteobac Gamm Legio Coxiella Aquicella       | 0 | 0 | 0 | 1 | 0 | 0 | 0 | 0 | 0 | 0 | 0 | 0 | 1 |
| Cluster7185; Proteobacteria                                | 0 | 0 | 0 | 0 | 0 | 0 | 0 | 0 | 1 | 0 | 0 | 0 | 1 |
| Cluster7186; Proteobac Alphap Rhodospirillales             | 0 | 0 | 0 | 0 | 0 | 0 | 0 | 1 | 0 | 0 | 0 | 0 | 1 |
| Cluster7197; Proteobac Alphap Rhodospirillales             | 0 | 0 | 0 | 0 | 0 | 0 | 0 | 0 | 0 | 1 | 0 | 0 | 1 |
| Cluster7202; Proteobacteria                                | 0 | 0 | 0 | 0 | 0 | 0 | 0 | 1 | 0 | 0 | 0 | 0 | 1 |
| Cluster7216; Proteobac Alphaproteobacteria                 | 0 | 0 | 0 | 0 | 1 | 0 | 0 | 0 | 0 | 0 | 0 | 0 | 1 |
| Cluster7218; Proteobac Betapr Burkl Burkhol Burkholderia   | 0 | 0 | 0 | 0 | 0 | 0 | 0 | 0 | 0 | 0 | 1 | 0 | 1 |
| Cluster7244; Proteobacteria                                | 0 | 0 | 0 | 0 | 0 | 0 | 0 | 0 | 0 | 0 | 0 | 1 | 1 |
| Cluster7249; Acidobact Acidobacteria_Gp2 Gp2               | 0 | 0 | 0 | 0 | 1 | 0 | 0 | 0 | 0 | 0 | 0 | 0 | 1 |
| Cluster7252; Verrucom Opitutae                             | 0 | 0 | 0 | 0 | 0 | 0 | 1 | 0 | 0 | 0 | 0 | 0 | 1 |
| Cluster7254; Proteobac Gammaproteobacteria                 | 0 | 0 | 0 | 0 | 0 | 0 | 0 | 1 | 0 | 0 | 0 | 0 | 1 |
| Cluster7255; size=2                                        | 0 | 0 | 0 | 0 | 0 | 0 | 1 | 0 | 0 | 0 | 0 | 0 | 1 |
| Cluster7265; Proteobac Gamm Xantl Sinobac Steroidobacter   | 0 | 0 | 0 | 0 | 0 | 0 | 0 | 0 | 0 | 1 | 0 | 0 | 1 |
| Cluster7274; Acidobacteria                                 | 0 | 0 | 0 | 0 | 1 | 0 | 0 | 0 | 0 | 0 | 0 | 0 | 1 |
| Cluster7280; Proteobac Alphap Rhizobiales                  | 0 | 0 | 1 | 0 | 0 | 0 | 0 | 0 | 0 | 0 | 0 | 0 | 1 |
| Cluster7290; Proteobac Alphap Rhizc Bradyrh Bradyrhizobiur | 0 | 0 | 0 | 0 | 0 | 0 | 0 | 1 | 0 | 0 | 0 | 0 | 1 |
| Cluster7298; Acidobact Acidobacteria_Gp1 Acidobacteriur    | 0 | 0 | 0 | 0 | 0 | 0 | 0 | 1 | 0 | 0 | 0 | 0 | 1 |
| Cluster7319; size=1                                        | 0 | 0 | 0 | 1 | 0 | 0 | 0 | 0 | 0 | 0 | 0 | 0 | 1 |
| Cluster7327; size=6                                        | 0 | 0 | 0 | 0 | 0 | 1 | 0 | 0 | 0 | 0 | 0 | 0 | 1 |





|                                                              |   |   |   |   |   |   |   |   |   |   |   |   |   |
|--------------------------------------------------------------|---|---|---|---|---|---|---|---|---|---|---|---|---|
| Cluster7482; Proteobac Alphap Rhodospirillales               | 0 | 0 | 0 | 0 | 0 | 0 | 0 | 1 | 0 | 0 | 0 | 0 | 1 |
| Cluster7486; Proteobac Alphap Rhodospirillales               | 0 | 0 | 0 | 0 | 0 | 0 | 0 | 0 | 1 | 0 | 0 | 0 | 1 |
| Cluster7501; Bacteroid Sphing Sphir Chitino; Sediminibacteri | 0 | 0 | 0 | 0 | 0 | 0 | 1 | 0 | 0 | 0 | 0 | 0 | 1 |
| Cluster7508; Proteobac Alphap Rhodospirillales               | 0 | 0 | 0 | 0 | 0 | 1 | 0 | 0 | 0 | 0 | 0 | 0 | 1 |
| Cluster7512; Proteobac Alphap Rhod Rhodospirillaceae         | 0 | 0 | 0 | 1 | 0 | 0 | 0 | 0 | 0 | 0 | 0 | 0 | 1 |
| Cluster7516; Acidobact Acidobacteria_Gp2 Gp2                 | 0 | 0 | 0 | 0 | 0 | 0 | 1 | 0 | 0 | 0 | 0 | 0 | 1 |
| Cluster7518; Acidobact Acidobacteria_Gp1 Gp1                 | 0 | 0 | 0 | 0 | 0 | 1 | 0 | 0 | 0 | 0 | 0 | 0 | 1 |
| Cluster7538; Verrucom Subdivision3 Subdivision3_ξ            | 0 | 0 | 0 | 0 | 0 | 0 | 0 | 1 | 0 | 0 | 0 | 0 | 1 |
| Cluster7544; Proteobac Alphap Rhizobiales                    | 0 | 0 | 0 | 0 | 0 | 0 | 1 | 0 | 0 | 0 | 0 | 0 | 1 |
| Cluster7547; Actinobac Actinol Actin Catenul Catenulispora   | 0 | 0 | 0 | 0 | 0 | 0 | 0 | 1 | 0 | 0 | 0 | 0 | 1 |
| Cluster7548; Actinobac Actinol Acidimicrobiales              | 0 | 0 | 0 | 0 | 0 | 0 | 0 | 0 | 0 | 0 | 1 | 0 | 1 |
| Cluster7559; Proteobac Alphap Rhizobiales                    | 0 | 0 | 0 | 0 | 0 | 0 | 0 | 0 | 1 | 0 | 0 | 0 | 1 |
| Cluster7561; Actinobac Actinol Acidi Acidimii Aciditerrimona | 0 | 0 | 0 | 0 | 0 | 0 | 0 | 0 | 1 | 0 | 0 | 0 | 1 |
| Cluster7571; Proteobac Alphap Caulc Caulobacteraceae         | 0 | 0 | 0 | 0 | 0 | 0 | 0 | 0 | 0 | 0 | 0 | 1 | 1 |
| Cluster7573;size=3                                           | 0 | 0 | 0 | 0 | 0 | 0 | 0 | 0 | 0 | 0 | 1 | 0 | 1 |
| Cluster7576; Actinobac Actinol Actinomycetales               | 0 | 0 | 0 | 0 | 0 | 0 | 0 | 0 | 0 | 0 | 0 | 1 | 1 |
| Cluster7578; Proteobac Alphap Rhizobiales                    | 1 | 0 | 0 | 0 | 0 | 0 | 0 | 0 | 0 | 0 | 0 | 0 | 1 |
| Cluster7579; Acidobact Acidobacteria_Gp1                     | 0 | 0 | 0 | 0 | 0 | 0 | 0 | 0 | 0 | 0 | 1 | 0 | 1 |
| Cluster7581; Planctomycetes                                  | 0 | 0 | 0 | 0 | 0 | 0 | 1 | 0 | 0 | 0 | 0 | 0 | 1 |
| Cluster7586; Acidobact Acidobacteria_Gp1                     | 0 | 0 | 0 | 0 | 0 | 0 | 0 | 0 | 0 | 0 | 1 | 0 | 1 |
| Cluster7601;size=1                                           | 1 | 0 | 0 | 0 | 0 | 0 | 0 | 0 | 0 | 0 | 0 | 0 | 1 |
| Cluster7604; Proteobac Alphap Rhodospirillales               | 0 | 1 | 0 | 0 | 0 | 0 | 0 | 0 | 0 | 0 | 0 | 0 | 1 |
| Cluster7607; Acidobact Acidobacteria_Gp7 Gp7                 | 0 | 0 | 0 | 0 | 0 | 0 | 1 | 0 | 0 | 0 | 0 | 0 | 1 |
| Cluster7611; Proteobac Alphap Rhodospirillales               | 0 | 0 | 1 | 0 | 0 | 0 | 0 | 0 | 0 | 0 | 0 | 0 | 1 |
| Cluster7617; Proteobac Alphaproteobacteria                   | 0 | 0 | 0 | 0 | 0 | 0 | 0 | 0 | 0 | 0 | 1 | 0 | 1 |
| Cluster7621; Actinobac Actinol Actin Sporichi Sporichthya    | 0 | 0 | 0 | 0 | 0 | 0 | 1 | 0 | 0 | 0 | 0 | 0 | 1 |
| Cluster7639; Proteobac Betapr Burkl Burkhol Burkholderia     | 0 | 0 | 0 | 0 | 0 | 0 | 0 | 1 | 0 | 0 | 0 | 0 | 1 |
| Cluster7642; Chlamydi; Chlamy Chlar Parachl; Parachlamydia   | 0 | 0 | 0 | 0 | 0 | 0 | 1 | 0 | 0 | 0 | 0 | 0 | 1 |
| Cluster7647; Acidobact Acidobacteria_Gp10 Gp10               | 0 | 0 | 0 | 0 | 0 | 1 | 0 | 0 | 0 | 0 | 0 | 0 | 1 |

|                                                         |   |   |   |   |   |   |   |   |   |   |   |   |   |
|---------------------------------------------------------|---|---|---|---|---|---|---|---|---|---|---|---|---|
| Cluster7648; Proteobac Gamm Xantho Xanthor Frateuria    | 0 | 0 | 0 | 0 | 0 | 0 | 1 | 0 | 0 | 0 | 0 | 0 | 1 |
| Cluster7649; Proteobac Alphaproteobacteria              | 0 | 0 | 0 | 0 | 1 | 0 | 0 | 0 | 0 | 0 | 0 | 0 | 1 |
| Cluster7651; Proteobac Alpha Rhizc Bradyrh Agromonas    | 0 | 0 | 0 | 0 | 0 | 0 | 1 | 0 | 0 | 0 | 0 | 0 | 1 |
| Cluster7655; Acidobact Acidobacteria_Gp1                | 0 | 0 | 0 | 0 | 0 | 0 | 0 | 0 | 0 | 0 | 1 | 0 | 1 |
| Cluster7680; Proteobac Alpha Rhizc Bradyrhizobiaceae    | 0 | 0 | 0 | 0 | 0 | 0 | 1 | 0 | 0 | 0 | 0 | 0 | 1 |
| Cluster7682; Acidobact Acidobacteria_Gp3 Gp3            | 0 | 0 | 0 | 1 | 0 | 0 | 0 | 0 | 0 | 0 | 0 | 0 | 1 |
| Cluster7683; Proteobac Alpha Rhizobiales                | 0 | 0 | 0 | 0 | 0 | 0 | 0 | 1 | 0 | 0 | 0 | 0 | 1 |
| Cluster7686; Verrucom Subdivision3 Subdivision3_ξ       | 0 | 0 | 1 | 0 | 0 | 0 | 0 | 0 | 0 | 0 | 0 | 0 | 1 |
| Cluster7693;size=1                                      | 0 | 0 | 0 | 1 | 0 | 0 | 0 | 0 | 0 | 0 | 0 | 0 | 1 |
| Cluster7700; Proteobac Gammaproteobacteria              | 0 | 0 | 0 | 0 | 0 | 0 | 0 | 0 | 0 | 0 | 1 | 0 | 1 |
| Cluster7706;size=1                                      | 0 | 0 | 0 | 0 | 0 | 0 | 0 | 1 | 0 | 0 | 0 | 0 | 1 |
| Cluster7708; Acidobact Acidobacteria_Gp2 Gp2            | 0 | 0 | 0 | 0 | 0 | 0 | 0 | 1 | 0 | 0 | 0 | 0 | 1 |
| Cluster7712; Proteobac Alpha Rhizobiales                | 0 | 0 | 0 | 0 | 0 | 0 | 0 | 1 | 0 | 0 | 0 | 0 | 1 |
| Cluster7717; Armatimonadetes Armatimonade               | 0 | 0 | 1 | 0 | 0 | 0 | 0 | 0 | 0 | 0 | 0 | 0 | 1 |
| Cluster7729;size=1                                      | 0 | 0 | 0 | 0 | 0 | 1 | 0 | 0 | 0 | 0 | 0 | 0 | 1 |
| Cluster7730; Proteobac Alpha Rhodospirillales           | 0 | 0 | 1 | 0 | 0 | 0 | 0 | 0 | 0 | 0 | 0 | 0 | 1 |
| Cluster7731; Acidobact Acidobacteria_Gp1 Acidobacteriur | 0 | 0 | 0 | 0 | 0 | 0 | 0 | 0 | 0 | 0 | 0 | 1 | 1 |
| Cluster7737; Proteobac Alpha Rhizc Xantho Pseudolabrys  | 1 | 0 | 0 | 0 | 0 | 0 | 0 | 0 | 0 | 0 | 0 | 0 | 1 |
| Cluster7738; Proteobac Alpha Rhizobiales                | 0 | 0 | 0 | 0 | 0 | 0 | 1 | 0 | 0 | 0 | 0 | 0 | 1 |
| Cluster7739; Proteobac Alpha Rhizobiales                | 0 | 0 | 0 | 0 | 0 | 1 | 0 | 0 | 0 | 0 | 0 | 0 | 1 |
| Cluster7740; Actinobac Actinobacteria                   | 0 | 0 | 1 | 0 | 0 | 0 | 0 | 0 | 0 | 0 | 0 | 0 | 1 |
| Cluster7744; Acidobact Acidobacteria_Gp2 Gp2            | 0 | 1 | 0 | 0 | 0 | 0 | 0 | 0 | 0 | 0 | 0 | 0 | 1 |
| Cluster7746; Proteobac Alpha Rhodospirillales           | 0 | 1 | 0 | 0 | 0 | 0 | 0 | 0 | 0 | 0 | 0 | 0 | 1 |
| Cluster7749; Proteobac Alphaproteobacteria              | 0 | 0 | 0 | 1 | 0 | 0 | 0 | 0 | 0 | 0 | 0 | 0 | 1 |
| Cluster7751; Proteobac Alpha Rhodospirillales           | 0 | 0 | 0 | 0 | 0 | 0 | 0 | 1 | 0 | 0 | 0 | 0 | 1 |
| Cluster7761; Acidobact Acidobacteria_Gp1 Gp1            | 0 | 0 | 0 | 0 | 0 | 0 | 1 | 0 | 0 | 0 | 0 | 0 | 1 |
| Cluster7764;size=1                                      | 0 | 0 | 0 | 0 | 0 | 0 | 0 | 0 | 0 | 0 | 0 | 1 | 1 |
| Cluster7775; Proteobac Alphaproteobacteria              | 0 | 0 | 1 | 0 | 0 | 0 | 0 | 0 | 0 | 0 | 0 | 0 | 1 |
| Cluster7777; Proteobac Alpha Rhodospirillales           | 0 | 0 | 0 | 0 | 0 | 0 | 1 | 0 | 0 | 0 | 0 | 0 | 1 |



|                                                            |   |   |   |   |   |   |   |   |   |   |   |   |   |
|------------------------------------------------------------|---|---|---|---|---|---|---|---|---|---|---|---|---|
| Cluster7947; Armatimc Chthor Chtho Chthoni Chthonomona     | 0 | 0 | 0 | 0 | 0 | 1 | 0 | 0 | 0 | 0 | 0 | 0 | 1 |
| Cluster7949; Proteobac Deltaproteobacteria                 | 0 | 0 | 0 | 0 | 0 | 0 | 0 | 0 | 1 | 0 | 0 | 0 | 1 |
| Cluster7952; Acidobact Acidobacteria_Gp1 Gp1               | 0 | 0 | 1 | 0 | 0 | 0 | 0 | 0 | 0 | 0 | 0 | 0 | 1 |
| Cluster7956;size=2                                         | 0 | 0 | 0 | 1 | 0 | 0 | 0 | 0 | 0 | 0 | 0 | 0 | 1 |
| Cluster7960; Proteobac Deltap Myxococcales                 | 0 | 0 | 0 | 0 | 0 | 1 | 0 | 0 | 0 | 0 | 0 | 0 | 1 |
| Cluster7961; Proteobac Betapr Burk Oxalobz Janthinobacter  | 0 | 0 | 0 | 0 | 0 | 1 | 0 | 0 | 0 | 0 | 0 | 0 | 1 |
| Cluster7962; Proteobac Alphap Rhizc Bradyrhizobiaceae      | 0 | 0 | 0 | 0 | 0 | 1 | 0 | 0 | 0 | 0 | 0 | 0 | 1 |
| Cluster7979; Proteobac Alphap Rhodospirillales             | 0 | 0 | 0 | 0 | 0 | 0 | 0 | 0 | 0 | 0 | 1 | 0 | 1 |
| Cluster7982; Proteobac Alphap Rhod Acetobacteraceae        | 0 | 0 | 0 | 0 | 0 | 0 | 0 | 0 | 0 | 0 | 1 | 0 | 1 |
| Cluster7983; Acidobact Acidobacteria_Gp3 Gp3               | 0 | 0 | 0 | 0 | 0 | 0 | 0 | 0 | 0 | 0 | 1 | 0 | 1 |
| Cluster7986; Proteobac Gammaproteobacteria                 | 0 | 0 | 0 | 0 | 0 | 0 | 0 | 0 | 0 | 0 | 1 | 0 | 1 |
| Cluster7987; Acidobact Acidobacteria_Gp2 Gp2               | 0 | 0 | 0 | 1 | 0 | 0 | 0 | 0 | 0 | 0 | 0 | 0 | 1 |
| Cluster7988; Proteobac Alphap Rhizc Bradyrhizobiaceae      | 0 | 0 | 0 | 0 | 0 | 0 | 0 | 0 | 1 | 0 | 0 | 0 | 1 |
| Cluster7990; Proteobac Deltap Myxc Cystobacteraceae        | 0 | 0 | 0 | 0 | 0 | 0 | 0 | 0 | 0 | 0 | 1 | 0 | 1 |
| Cluster7991; Verrucom Subdivision3 Subdivision3_ξ          | 0 | 0 | 0 | 1 | 0 | 0 | 0 | 0 | 0 | 0 | 0 | 0 | 1 |
| Cluster7992; Verrucom Opitut; Opitu Opituta Opitutus       | 0 | 0 | 0 | 0 | 0 | 0 | 0 | 0 | 0 | 0 | 1 | 0 | 1 |
| Cluster7994; Proteobac Betapr Burkholderiales              | 0 | 0 | 0 | 1 | 0 | 0 | 0 | 0 | 0 | 0 | 0 | 0 | 1 |
| Cluster7995; Proteobac Deltap Myxococcales                 | 0 | 0 | 1 | 0 | 0 | 0 | 0 | 0 | 0 | 0 | 0 | 0 | 1 |
| Cluster8018; Acidobact Acidobacteria_Gp3                   | 0 | 0 | 0 | 1 | 0 | 0 | 0 | 0 | 0 | 0 | 0 | 0 | 1 |
| Cluster8026; Proteobac Deltap Bdeff Bdellovi Vampirovibrio | 0 | 0 | 0 | 0 | 0 | 0 | 0 | 0 | 0 | 0 | 1 | 0 | 1 |
| Cluster8031; Acidobact Acidobacteria_Gp3 Gp3               | 0 | 1 | 0 | 0 | 0 | 0 | 0 | 0 | 0 | 0 | 0 | 0 | 1 |
| Cluster8038; Actinobac Actinol Actin Actinosj Actinospica  | 0 | 0 | 0 | 0 | 0 | 0 | 0 | 0 | 0 | 0 | 0 | 1 | 1 |
| Cluster8040; Acidobact Acidobacteria_Gp1                   | 0 | 0 | 0 | 1 | 0 | 0 | 0 | 0 | 0 | 0 | 0 | 0 | 1 |
| Cluster8045; Proteobac Betapr Burk Burkholderia            | 0 | 0 | 0 | 1 | 0 | 0 | 0 | 0 | 0 | 0 | 0 | 0 | 1 |
| Cluster8049; Planctomycetes                                | 0 | 0 | 0 | 0 | 1 | 0 | 0 | 0 | 0 | 0 | 0 | 0 | 1 |
| Cluster8051;size=8                                         | 0 | 0 | 0 | 0 | 0 | 0 | 1 | 0 | 0 | 0 | 0 | 0 | 1 |
| Cluster8058; Actinobac Actinol Actin Actinosj Actinospica  | 0 | 0 | 0 | 1 | 0 | 0 | 0 | 0 | 0 | 0 | 0 | 0 | 1 |
| Cluster8060; Verrucom Spartobacteria Spartobacteria        | 0 | 0 | 1 | 0 | 0 | 0 | 0 | 0 | 0 | 0 | 0 | 0 | 1 |
| Cluster8062; Planctom Planct Planct Planctoi Planctomyces  | 0 | 0 | 0 | 0 | 0 | 0 | 0 | 0 | 0 | 0 | 1 | 0 | 1 |

|                                                            |   |   |   |   |   |   |   |   |   |   |   |   |   |
|------------------------------------------------------------|---|---|---|---|---|---|---|---|---|---|---|---|---|
| Cluster8070; Acidobact Acidobacteria_Gp1                   | 0 | 0 | 0 | 1 | 0 | 0 | 0 | 0 | 0 | 0 | 0 | 0 | 1 |
| Cluster8103; Armatimc Armati Arma Armatin Armatimonas/     | 0 | 0 | 0 | 0 | 0 | 0 | 1 | 0 | 0 | 0 | 0 | 0 | 1 |
| Cluster8105;size=2                                         | 0 | 0 | 0 | 0 | 0 | 0 | 0 | 0 | 0 | 0 | 1 | 0 | 1 |
| Cluster8110; Acidobact Acidobacteria_Gp2 Gp2               | 0 | 0 | 0 | 1 | 0 | 0 | 0 | 0 | 0 | 0 | 0 | 0 | 1 |
| Cluster8111; Proteobac Alphap Rhizc Bradyrh Bradyrhizobiur | 0 | 0 | 0 | 0 | 0 | 0 | 1 | 0 | 0 | 0 | 0 | 0 | 1 |
| Cluster8114;size=1                                         | 0 | 0 | 0 | 0 | 0 | 0 | 0 | 0 | 0 | 0 | 1 | 0 | 1 |
| Cluster8116; Proteobac Alphap Rhodospirillales             | 0 | 0 | 0 | 1 | 0 | 0 | 0 | 0 | 0 | 0 | 0 | 0 | 1 |
| Cluster8118; Acidobact Acidobacteria_Gp2 Gp2               | 0 | 0 | 0 | 1 | 0 | 0 | 0 | 0 | 0 | 0 | 0 | 0 | 1 |
| Cluster8128; Acidobact Acidobacteria_Gp3                   | 0 | 0 | 0 | 0 | 0 | 0 | 0 | 0 | 0 | 0 | 1 | 0 | 1 |
| Cluster8138; Proteobac Alphap Rhizc Bradyrhizobiaceae      | 0 | 0 | 1 | 0 | 0 | 0 | 0 | 0 | 0 | 0 | 0 | 0 | 1 |
| Cluster8139;size=1                                         | 0 | 0 | 0 | 0 | 1 | 0 | 0 | 0 | 0 | 0 | 0 | 0 | 1 |
| Cluster8140; Acidobact Acidobacteria_Gp3 Gp3               | 0 | 0 | 0 | 0 | 0 | 0 | 0 | 0 | 0 | 1 | 0 | 0 | 1 |
| Cluster8141; Acidobact Acidobacteria_Gp5 Gp5               | 0 | 0 | 0 | 0 | 0 | 0 | 0 | 0 | 0 | 0 | 1 | 0 | 1 |
| Cluster8142; Verrucom Opitut; Opitu Opituta Opitutus       | 0 | 0 | 0 | 0 | 0 | 0 | 0 | 0 | 0 | 1 | 0 | 0 | 1 |
| Cluster8158; Acidobact Acidobacteria_Gp2 Gp2               | 0 | 0 | 0 | 0 | 0 | 0 | 0 | 0 | 1 | 0 | 0 | 0 | 1 |
| Cluster8159; Bacteroid Sphing Sphir Sphingo Mucilaginibact | 0 | 0 | 0 | 0 | 1 | 0 | 0 | 0 | 0 | 0 | 0 | 0 | 1 |
| Cluster8163; Proteobac Alphap Rhodospirillales             | 0 | 0 | 0 | 0 | 1 | 0 | 0 | 0 | 0 | 0 | 0 | 0 | 1 |
| Cluster8164; Proteobacteria                                | 0 | 0 | 0 | 0 | 1 | 0 | 0 | 0 | 0 | 0 | 0 | 0 | 1 |
| Cluster8166; Proteobac Alphaproteobacteria                 | 1 | 0 | 0 | 0 | 0 | 0 | 0 | 0 | 0 | 0 | 0 | 0 | 1 |
| Cluster8169; Acidobact Acidobacteria_Gp1                   | 0 | 0 | 0 | 0 | 1 | 0 | 0 | 0 | 0 | 0 | 0 | 0 | 1 |
| Cluster8172;size=1                                         | 0 | 0 | 1 | 0 | 0 | 0 | 0 | 0 | 0 | 0 | 0 | 0 | 1 |
| Cluster8173; Proteobac Alphap Rhizc Bradyrhizobiaceae      | 0 | 0 | 0 | 1 | 0 | 0 | 0 | 0 | 0 | 0 | 0 | 0 | 1 |
| Cluster8175; Verrucom Spartobacteria Spartobacteria        | 0 | 0 | 0 | 0 | 1 | 0 | 0 | 0 | 0 | 0 | 0 | 0 | 1 |
| Cluster8181;size=4                                         | 0 | 0 | 0 | 0 | 0 | 0 | 0 | 0 | 1 | 0 | 0 | 0 | 1 |
| Cluster8190; Proteobac Betapr Burkl Burkhol Burkholderia   | 0 | 0 | 0 | 0 | 1 | 0 | 0 | 0 | 0 | 0 | 0 | 0 | 1 |
| Cluster8193; Acidobact Acidobacteria_Gp3 Gp3               | 0 | 0 | 0 | 0 | 0 | 0 | 0 | 0 | 0 | 0 | 1 | 0 | 1 |
| Cluster8196; Acidobact Acidobacteria_Gp1 Granulicella      | 0 | 0 | 0 | 0 | 1 | 0 | 0 | 0 | 0 | 0 | 0 | 0 | 1 |
| Cluster8197; Acidobacteria                                 | 0 | 0 | 0 | 0 | 1 | 0 | 0 | 0 | 0 | 0 | 0 | 0 | 1 |
| Cluster8199; Acidobact Acidobacteria_Gp2 Gp2               | 0 | 0 | 0 | 0 | 0 | 1 | 0 | 0 | 0 | 0 | 0 | 0 | 1 |











|                                      |                     |                  |                   |              |   |   |   |   |   |   |   |   |   |   |
|--------------------------------------|---------------------|------------------|-------------------|--------------|---|---|---|---|---|---|---|---|---|---|
| Cluster8762; Verrucom Spartobacteria | Spartobacteria      | 0                | 0                 | 1            | 0 | 0 | 0 | 0 | 0 | 0 | 0 | 0 | 0 | 1 |
| Cluster8769; Actinobac               | Actinobac           | 0                | 0                 | 0            | 0 | 0 | 0 | 0 | 0 | 0 | 0 | 1 | 0 | 1 |
| Cluster8779; Acidobact               | Acidobacteria_Gp3   | Gp3              | 0                 | 0            | 0 | 0 | 0 | 0 | 0 | 0 | 0 | 1 | 0 | 1 |
| Cluster8789; Proteobac               | Alphap              | Rhizc            | Xanthol           | Pseudolabrys | 0 | 0 | 0 | 0 | 1 | 0 | 0 | 0 | 0 | 1 |
| Cluster8791; Proteobac               | Alphaproteobacteria | 0                | 0                 | 0            | 0 | 1 | 0 | 0 | 0 | 0 | 0 | 0 | 0 | 1 |
| Cluster8800; Proteobac               | Alphaproteobacteria | 0                | 0                 | 0            | 0 | 0 | 0 | 0 | 0 | 0 | 1 | 0 | 0 | 1 |
| Cluster8802; Proteobac               | Alphap              | Rhodospirillales | 0                 | 0            | 0 | 0 | 0 | 0 | 0 | 0 | 0 | 1 | 0 | 1 |
| Cluster8805; Proteobac               | Alphap              | Rhod             | Rhodospirillaceae | 0            | 0 | 0 | 0 | 1 | 0 | 0 | 0 | 0 | 0 | 1 |
| Cluster8806; Acidobact               | Acidobacteria_Gp3   | Gp3              | 0                 | 0            | 0 | 0 | 0 | 0 | 0 | 0 | 1 | 0 | 0 | 1 |
| Cluster8807; Proteobac               | Alphap              | Rhizobiales      | 0                 | 0            | 0 | 0 | 0 | 0 | 0 | 0 | 1 | 0 | 0 | 1 |
| Cluster8814; Proteobac               | Gamm                | Xanthomonadales  | 0                 | 0            | 0 | 0 | 0 | 0 | 0 | 0 | 1 | 0 | 0 | 1 |
| Cluster8823; Acidobact               | Acidobacteria_Gp3   | Gp3              | 0                 | 0            | 0 | 0 | 1 | 0 | 0 | 0 | 0 | 0 | 0 | 1 |
| Cluster8826; Acidobact               | Acidobacteria_Gp3   | 0                | 0                 | 0            | 0 | 1 | 0 | 0 | 0 | 0 | 0 | 0 | 0 | 1 |
| Cluster8830; Chlamydi                | Chlam               | Chlar            | Parachl           | Neochlamydia | 0 | 0 | 0 | 0 | 1 | 0 | 0 | 0 | 0 | 1 |
| Cluster8832; size=1                  |                     | 0                | 0                 | 0            | 0 | 0 | 0 | 0 | 0 | 0 | 0 | 1 | 0 | 1 |
| Cluster8835; Verrucom                | Subdivision3        | Subdivision3_ξ   | 1                 | 0            | 0 | 0 | 0 | 0 | 0 | 0 | 0 | 0 | 0 | 1 |
| Cluster8839; Proteobac               | Alphaproteobacteria | 1                | 0                 | 0            | 0 | 0 | 0 | 0 | 0 | 0 | 0 | 0 | 0 | 1 |
| Cluster8846; Verrucom                | Opitut              | Opitut           | Opituta           | Opitutus     | 0 | 0 | 0 | 0 | 0 | 1 | 0 | 0 | 0 | 1 |
| Cluster8866; Acidobact               | Acidobacteria_Gp3   | Gp3              | 0                 | 0            | 1 | 0 | 0 | 0 | 0 | 0 | 0 | 0 | 0 | 1 |
| Cluster8872; Acidobact               | Acidobacteria_Gp1   | 0                | 0                 | 0            | 0 | 0 | 0 | 0 | 0 | 1 | 0 | 0 | 0 | 1 |
| Cluster8878; Proteobac               | Alphaproteobacteria | 0                | 0                 | 0            | 0 | 0 | 0 | 0 | 1 | 0 | 0 | 0 | 0 | 1 |
| Cluster8879; Acidobacteria           | 0                   | 0                | 0                 | 0            | 0 | 0 | 0 | 0 | 1 | 0 | 0 | 0 | 0 | 1 |
| Cluster8885; Acidobact               | Acidobacteria_Gp1   | Gp1              | 0                 | 0            | 0 | 0 | 0 | 1 | 0 | 0 | 0 | 0 | 0 | 1 |
| Cluster8891; Proteobac               | Deltaproteobacteria | 0                | 0                 | 0            | 0 | 1 | 0 | 0 | 0 | 0 | 0 | 0 | 0 | 1 |
| Cluster8892; Acidobact               | Acidobacteria_Gp1   | 0                | 0                 | 0            | 0 | 0 | 0 | 0 | 0 | 0 | 1 | 0 | 0 | 1 |
| Cluster8895; Acidobact               | Acidobacteria_Gp1   | 1                | 0                 | 0            | 0 | 0 | 0 | 0 | 0 | 0 | 0 | 0 | 0 | 1 |
| Cluster8909; Acidobact               | Acidobacteria_Gp1   | Granulicella     | 0                 | 0            | 1 | 0 | 0 | 0 | 0 | 0 | 0 | 0 | 0 | 1 |
| Cluster8914; Proteobac               | Gamm                | Xantl            | Xanthomonadaceae  | 0            | 0 | 0 | 0 | 0 | 0 | 0 | 0 | 0 | 1 | 1 |
| Cluster8918; Acidobact               | Acidobacteria_Gp3   | 0                | 0                 | 0            | 0 | 0 | 0 | 0 | 0 | 0 | 0 | 1 | 0 | 1 |

|                                                            |   |   |   |   |   |   |   |   |   |   |   |   |   |
|------------------------------------------------------------|---|---|---|---|---|---|---|---|---|---|---|---|---|
| Cluster8926; Proteobac Alphap Rhizc Methylocystaceae       | 0 | 0 | 1 | 0 | 0 | 0 | 0 | 0 | 0 | 0 | 0 | 0 | 1 |
| Cluster8927; Verrucom Subdivision3 Subdivision3_ε          | 1 | 0 | 0 | 0 | 0 | 0 | 0 | 0 | 0 | 0 | 0 | 0 | 1 |
| Cluster8933;size=1                                         | 0 | 0 | 0 | 0 | 0 | 0 | 0 | 0 | 0 | 0 | 0 | 1 | 1 |
| Cluster8936; Acidobact Acidobacteria_Gp1 Gp1               | 0 | 0 | 0 | 0 | 0 | 0 | 1 | 0 | 0 | 0 | 0 | 0 | 1 |
| Cluster8948; Acidobact Acidobacteria_Gp1                   | 0 | 0 | 0 | 0 | 0 | 0 | 0 | 0 | 0 | 0 | 0 | 1 | 1 |
| Cluster8965; Acidobacteria                                 | 0 | 0 | 0 | 0 | 0 | 0 | 0 | 0 | 0 | 0 | 0 | 1 | 1 |
| Cluster8976; Acidobacteria                                 | 0 | 0 | 0 | 0 | 1 | 0 | 0 | 0 | 0 | 0 | 0 | 0 | 1 |
| Cluster8977; Proteobac Alphap Rhodospirillales             | 0 | 0 | 1 | 0 | 0 | 0 | 0 | 0 | 0 | 0 | 0 | 0 | 1 |
| Cluster8992;size=1                                         | 0 | 0 | 0 | 0 | 0 | 0 | 0 | 1 | 0 | 0 | 0 | 0 | 1 |
| Cluster9001; Proteobac Deltaproteobacteria                 | 0 | 0 | 0 | 0 | 0 | 0 | 1 | 0 | 0 | 0 | 0 | 0 | 1 |
| Cluster9005; Verrucom Spartobacteria Spartobacteria        | 0 | 0 | 0 | 0 | 0 | 0 | 1 | 0 | 0 | 0 | 0 | 0 | 1 |
| Cluster9006; Planctom Planct Planct Singulisphaera         | 0 | 0 | 0 | 0 | 0 | 0 | 0 | 1 | 0 | 0 | 0 | 0 | 1 |
| Cluster9012; Proteobac Alphap Rhizc Bradyrhizobiaceae      | 0 | 0 | 0 | 0 | 0 | 0 | 0 | 0 | 0 | 0 | 0 | 1 | 1 |
| Cluster9020; Acidobact Acidobacteria_Gp5 Gp5               | 0 | 0 | 0 | 0 | 0 | 0 | 1 | 0 | 0 | 0 | 0 | 0 | 1 |
| Cluster9026; Acidobacteria                                 | 1 | 0 | 0 | 0 | 0 | 0 | 0 | 0 | 0 | 0 | 0 | 0 | 1 |
| Cluster9028;size=1                                         | 0 | 0 | 0 | 0 | 0 | 0 | 0 | 1 | 0 | 0 | 0 | 0 | 1 |
| Cluster9040; Proteobac Alphap Rhodospirillales             | 0 | 0 | 0 | 0 | 0 | 0 | 0 | 0 | 1 | 0 | 0 | 0 | 1 |
| Cluster9042; Proteobac Betaproteobacteria                  | 0 | 0 | 0 | 0 | 0 | 0 | 0 | 1 | 0 | 0 | 0 | 0 | 1 |
| Cluster9043; Verrucom Spartobacteria Spartobacteria        | 0 | 0 | 0 | 0 | 0 | 0 | 0 | 0 | 0 | 0 | 0 | 1 | 1 |
| Cluster9047; Acidobact Acidobacteria_Gp1 Gp1               | 0 | 0 | 1 | 0 | 0 | 0 | 0 | 0 | 0 | 0 | 0 | 0 | 1 |
| Cluster9056; Actinobac Actinol Solirt Conexib Conexibacter | 0 | 0 | 0 | 0 | 0 | 0 | 0 | 0 | 0 | 0 | 0 | 1 | 1 |
| Cluster9057;size=5                                         | 0 | 0 | 0 | 0 | 0 | 0 | 1 | 0 | 0 | 0 | 0 | 0 | 1 |
| Cluster9058; Proteobac Alphap Rhod Rhodospirillaceae       | 0 | 0 | 0 | 0 | 0 | 0 | 0 | 0 | 0 | 0 | 0 | 1 | 1 |
| Cluster9060; Proteobac Alphap Rhodospirillales             | 0 | 0 | 0 | 0 | 0 | 0 | 0 | 1 | 0 | 0 | 0 | 0 | 1 |
| Cluster9061; Acidobact Acidobacteria_Gp1                   | 0 | 1 | 0 | 0 | 0 | 0 | 0 | 0 | 0 | 0 | 0 | 0 | 1 |
| Cluster9067; Verrucom Spartobacteria Spartobacteria        | 0 | 0 | 0 | 0 | 0 | 0 | 1 | 0 | 0 | 0 | 0 | 0 | 1 |
| Cluster9069; Acidobact Acidobacteria_Gp3                   | 0 | 0 | 0 | 0 | 0 | 0 | 0 | 1 | 0 | 0 | 0 | 0 | 1 |
| Cluster9072; Nitrospira Nitrosꝑ Nitro Nitrospi Nitrospira  | 0 | 0 | 0 | 0 | 0 | 0 | 0 | 0 | 1 | 0 | 0 | 0 | 1 |
| Cluster9073;size=3                                         | 0 | 0 | 0 | 0 | 0 | 0 | 1 | 0 | 0 | 0 | 0 | 0 | 1 |

















|                                                               |   |   |   |   |   |   |   |   |   |   |   |   |   |
|---------------------------------------------------------------|---|---|---|---|---|---|---|---|---|---|---|---|---|
| Cluster10159 Proteobac Alphap Rhizc Methylc Methylosinus      | 0 | 1 | 0 | 0 | 0 | 0 | 0 | 0 | 0 | 0 | 0 | 0 | 1 |
| Cluster10160 Proteobac Deltaproteobacteria                    | 0 | 0 | 0 | 0 | 0 | 0 | 1 | 0 | 0 | 0 | 0 | 0 | 1 |
| Cluster10161 Firmicute: Clostrii Clost Peptococcaceae1        | 0 | 0 | 1 | 0 | 0 | 0 | 0 | 0 | 0 | 0 | 0 | 0 | 1 |
| Cluster10163 Acidobact Acidobacteria_Gp1 Gp1                  | 0 | 0 | 0 | 0 | 0 | 0 | 0 | 1 | 0 | 0 | 0 | 0 | 1 |
| Cluster10166 Actinobac Actinol Soliru Solirubr Solirubrobacte | 0 | 0 | 0 | 0 | 1 | 0 | 0 | 0 | 0 | 0 | 0 | 0 | 1 |
| Cluster10167;size=7                                           | 0 | 0 | 0 | 0 | 1 | 0 | 0 | 0 | 0 | 0 | 0 | 0 | 1 |
| Cluster10180 Proteobac Alphap Rhizobiales                     | 0 | 0 | 0 | 0 | 0 | 0 | 1 | 0 | 0 | 0 | 0 | 0 | 1 |
| Cluster10181 Acidobact Acidobacteria_Gp2 Gp2                  | 0 | 0 | 0 | 0 | 1 | 0 | 0 | 0 | 0 | 0 | 0 | 0 | 1 |
| Cluster10182 Actinobac Actinol Actinomycetales                | 0 | 0 | 0 | 0 | 1 | 0 | 0 | 0 | 0 | 0 | 0 | 0 | 1 |
| Cluster10186 Acidobact Acidobacteria_Gp10 Gp10                | 0 | 0 | 0 | 1 | 0 | 0 | 0 | 0 | 0 | 0 | 0 | 0 | 1 |
| Cluster10196 Acidobact Acidobacteria_Gp2 Gp2                  | 0 | 0 | 0 | 0 | 1 | 0 | 0 | 0 | 0 | 0 | 0 | 0 | 1 |
| Cluster10198 Acidobacteria                                    | 0 | 0 | 0 | 0 | 0 | 0 | 0 | 1 | 0 | 0 | 0 | 0 | 1 |
| Cluster10201;size=2                                           | 0 | 0 | 0 | 0 | 0 | 0 | 1 | 0 | 0 | 0 | 0 | 0 | 1 |
| Cluster10211 Firmicute: Bacilli Bacill Bacillac Bacillus      | 0 | 0 | 0 | 0 | 0 | 0 | 0 | 0 | 1 | 0 | 0 | 0 | 1 |
| Cluster10218 Acidobact Acidobacteria_Gp1 Gp1                  | 0 | 0 | 0 | 0 | 0 | 0 | 1 | 0 | 0 | 0 | 0 | 0 | 1 |
| Cluster10221 Proteobac Alphap Rhizc Hyphomicrobiaceae         | 0 | 0 | 0 | 0 | 0 | 0 | 1 | 0 | 0 | 0 | 0 | 0 | 1 |
| Cluster10235;size=2                                           | 0 | 0 | 0 | 0 | 0 | 0 | 1 | 0 | 0 | 0 | 0 | 0 | 1 |
| Cluster10236 Proteobac Alphap Rhizobiales                     | 0 | 0 | 0 | 0 | 0 | 0 | 1 | 0 | 0 | 0 | 0 | 0 | 1 |
| Cluster10238 Proteobacteria                                   | 0 | 0 | 0 | 0 | 0 | 0 | 0 | 1 | 0 | 0 | 0 | 0 | 1 |
| Cluster10242 Actinobac Actinol Actin Microbacteriaceae        | 0 | 0 | 0 | 0 | 0 | 0 | 0 | 1 | 0 | 0 | 0 | 0 | 1 |
| Cluster10254 Acidobacteria                                    | 0 | 0 | 0 | 0 | 0 | 0 | 1 | 0 | 0 | 0 | 0 | 0 | 1 |
| Cluster10260 Acidobact Acidobacteria_Gp1 Gp1                  | 0 | 0 | 0 | 0 | 0 | 0 | 1 | 0 | 0 | 0 | 0 | 0 | 1 |
| Cluster10268 Acidobacteria                                    | 0 | 0 | 0 | 0 | 0 | 0 | 1 | 0 | 0 | 0 | 0 | 0 | 1 |
| Cluster10269 Acidobact Acidobacteria_Gp2 Gp2                  | 0 | 0 | 0 | 0 | 0 | 0 | 0 | 0 | 0 | 0 | 1 | 0 | 1 |
| Cluster10273 TM7 TM7_genera_i                                 | 0 | 0 | 0 | 0 | 0 | 0 | 0 | 0 | 0 | 0 | 1 | 0 | 1 |
| Cluster10276 Acidobact Acidobacteria_Gp2 Gp2                  | 0 | 0 | 0 | 0 | 0 | 0 | 0 | 1 | 0 | 0 | 0 | 0 | 1 |
| Cluster10289 Verrucom Subdivision3 Subdivision3_ξ             | 0 | 0 | 0 | 0 | 1 | 0 | 0 | 0 | 0 | 0 | 0 | 0 | 1 |
| Cluster10290 Acidobact Acidobacteria_Gp2 Gp2                  | 0 | 0 | 0 | 0 | 1 | 0 | 0 | 0 | 0 | 0 | 0 | 0 | 1 |
| Cluster10292 Proteobac Alphaproteobacteria                    | 0 | 0 | 0 | 0 | 0 | 0 | 1 | 0 | 0 | 0 | 0 | 0 | 1 |



|                     |                |                     |                 |                  |              |   |   |   |   |   |   |   |   |   |   |   |   |
|---------------------|----------------|---------------------|-----------------|------------------|--------------|---|---|---|---|---|---|---|---|---|---|---|---|
| Cluster10417        | Proteobac      | Gammaproteobacteria | 0               | 0                | 0            | 0 | 1 | 0 | 0 | 0 | 0 | 0 | 0 | 1 |   |   |   |
| Cluster10419        | Acidobact      | Acidobacteria_Gp3   | Gp3             | 0                | 0            | 0 | 1 | 0 | 0 | 0 | 0 | 0 | 0 | 1 |   |   |   |
| Cluster10425        | Acidobact      | Acidobacteria_Gp1   |                 | 0                | 0            | 1 | 0 | 0 | 0 | 0 | 0 | 0 | 0 | 1 |   |   |   |
| Cluster10430        | Acidobact      | Acidobacteria_Gp2   | Gp2             | 0                | 0            | 0 | 0 | 1 | 0 | 0 | 0 | 0 | 0 | 1 |   |   |   |
| Cluster10433        | Firmicute:     | Bacilli             | Bacill          | Bacillac         | Bacillus     | 0 | 0 | 0 | 0 | 0 | 0 | 0 | 1 | 0 | 1 |   |   |
| Cluster10441        | Acidobact      | Acidobacteria_Gp2   | Gp2             | 0                | 0            | 0 | 1 | 0 | 0 | 0 | 0 | 0 | 0 | 1 |   |   |   |
| Cluster10444        | Actinobac      | Actinol             | Actinomycetales | 0                | 0            | 0 | 0 | 0 | 0 | 0 | 0 | 0 | 1 | 0 | 1 |   |   |
| Cluster10447        | Acidobact      | Acidobacteria_Gp5   | Gp5             | 0                | 0            | 0 | 0 | 1 | 0 | 0 | 0 | 0 | 0 | 1 |   |   |   |
| Cluster10451        | Firmicute:     | Bacilli             | Bacill          | Planococcaceae   | 0            | 0 | 0 | 1 | 0 | 0 | 0 | 0 | 0 | 0 | 1 |   |   |
| Cluster10460        | Proteobacteria |                     | 0               | 0                | 0            | 0 | 0 | 0 | 0 | 1 | 0 | 0 | 0 | 0 | 1 |   |   |
| Cluster10474        | Acidobact      | Acidobacteria_Gp1   | Gp1             | 0                | 0            | 0 | 1 | 0 | 0 | 0 | 0 | 0 | 0 | 0 | 1 |   |   |
| Cluster10475        | Proteobac      | Alphaproteobacteria |                 | 0                | 0            | 0 | 0 | 0 | 0 | 0 | 0 | 0 | 1 | 0 | 1 |   |   |
| Cluster10482        | Acidobact      | Acidobacteria_Gp2   | Gp2             | 0                | 0            | 0 | 1 | 0 | 0 | 0 | 0 | 0 | 0 | 0 | 1 |   |   |
| Cluster10488        | Proteobac      | Betapr              | Burkl           | Burkhol          | Burkholderia | 0 | 0 | 0 | 0 | 0 | 0 | 1 | 0 | 0 | 0 | 1 |   |
| Cluster10489        | Acidobact      | Acidobacteria_Gp1   | Gp1             | 0                | 0            | 0 | 0 | 0 | 0 | 0 | 0 | 0 | 1 | 0 | 1 |   |   |
| Cluster10495        | Proteobac      | Gammaproteobacteria |                 | 0                | 0            | 0 | 1 | 0 | 0 | 0 | 0 | 0 | 0 | 0 | 1 |   |   |
| Cluster10502        | Acidobact      | Acidobacteria_Gp10  | Gp10            | 0                | 0            | 0 | 0 | 0 | 0 | 0 | 1 | 0 | 0 | 0 | 1 |   |   |
| Cluster10503        | Planctom       | Planct              | Planct          | Plancto          | Planctomyces | 0 | 0 | 0 | 0 | 0 | 0 | 1 | 0 | 0 | 0 | 1 |   |
| Cluster10511        | Acidobact      | Acidobacteria_Gp1   | Edaphobacter    | 0                | 0            | 0 | 0 | 0 | 0 | 0 | 0 | 0 | 1 | 0 | 0 | 1 |   |
| Cluster10514        | Proteobac      | Alphaproteobacteria |                 | 0                | 0            | 0 | 0 | 0 | 0 | 1 | 0 | 0 | 0 | 0 | 0 | 1 |   |
| Cluster10537        | Proteobacteria |                     | 0               | 0                | 0            | 0 | 0 | 0 | 0 | 1 | 0 | 0 | 0 | 0 | 0 | 1 |   |
| Cluster10544        | Acidobact      | Acidobacteria_Gp2   | Gp2             | 0                | 0            | 0 | 0 | 0 | 0 | 0 | 0 | 0 | 0 | 1 | 0 | 1 |   |
| Cluster10554        | Proteobac      | Alphap              | Rhizobiales     | 0                | 0            | 0 | 0 | 0 | 0 | 1 | 0 | 0 | 0 | 0 | 0 | 1 |   |
| Cluster10557        | Acidobact      | Acidobacteria_Gp2   | Gp2             | 0                | 0            | 0 | 1 | 0 | 0 | 0 | 0 | 0 | 0 | 0 | 0 | 1 |   |
| Cluster10559;size=4 |                |                     | 0               | 0                | 0            | 0 | 1 | 0 | 0 | 0 | 0 | 0 | 0 | 0 | 0 | 1 |   |
| Cluster10560        | Acidobacteria  |                     | 0               | 0                | 0            | 0 | 0 | 0 | 1 | 0 | 0 | 0 | 0 | 0 | 0 | 1 |   |
| Cluster10565        | Acidobact      | Acidobacteria_Gp2   | Gp2             | 0                | 0            | 0 | 1 | 0 | 0 | 0 | 0 | 0 | 0 | 0 | 0 | 1 |   |
| Cluster10582        | Acidobact      | Acidobacteria_Gp1   | Gp1             | 0                | 0            | 0 | 1 | 0 | 0 | 0 | 0 | 0 | 0 | 0 | 0 | 1 |   |
| Cluster10589        | Proteobac      | Alphap              | Rhizc           | Hypomicrobiaceae | 0            | 0 | 0 | 0 | 0 | 0 | 0 | 0 | 1 | 0 | 0 | 0 | 1 |













|              |                                                   |   |   |   |   |   |   |   |   |   |   |   |   |
|--------------|---------------------------------------------------|---|---|---|---|---|---|---|---|---|---|---|---|
| Cluster11351 | Proteobacteria                                    | 0 | 1 | 0 | 0 | 0 | 0 | 0 | 0 | 0 | 0 | 0 | 1 |
| Cluster11358 | Actinobac Actinol Solirub Solirubr Solirubrobacte | 0 | 0 | 0 | 0 | 1 | 0 | 0 | 0 | 0 | 0 | 0 | 1 |
| Cluster11359 | Acidobact Acidobacteria_Gp3 Gp3                   | 0 | 0 | 0 | 0 | 0 | 1 | 0 | 0 | 0 | 0 | 0 | 1 |
| Cluster11374 | ;size=2                                           | 0 | 0 | 0 | 0 | 0 | 1 | 0 | 0 | 0 | 0 | 0 | 1 |
| Cluster11381 | Acidobact Acidobacteria_Gp5 Gp5                   | 0 | 0 | 0 | 0 | 0 | 0 | 0 | 1 | 0 | 0 | 0 | 1 |
| Cluster11387 | Acidobact Acidobacteria_Gp2 Gp2                   | 0 | 0 | 0 | 0 | 0 | 1 | 0 | 0 | 0 | 0 | 0 | 1 |
| Cluster11388 | Acidobact Acidobacteria_Gp1 Gp1                   | 0 | 0 | 0 | 0 | 0 | 0 | 0 | 0 | 0 | 0 | 1 | 1 |
| Cluster11394 | Acidobact Acidobacteria_Gp1                       | 1 | 0 | 0 | 0 | 0 | 0 | 0 | 0 | 0 | 0 | 0 | 1 |
| Cluster11396 | Proteobac Alphaproteobacteria                     | 1 | 0 | 0 | 0 | 0 | 0 | 0 | 0 | 0 | 0 | 0 | 1 |
| Cluster11397 | Acidobact Acidobacteria_Gp13 Gp13                 | 1 | 0 | 0 | 0 | 0 | 0 | 0 | 0 | 0 | 0 | 0 | 1 |
| Cluster11398 | Bacteroidetes                                     | 0 | 0 | 0 | 0 | 0 | 1 | 0 | 0 | 0 | 0 | 0 | 1 |
| Cluster11401 | Acidobact Acidobacteria_Gp2 Gp2                   | 0 | 0 | 0 | 0 | 0 | 0 | 0 | 0 | 0 | 0 | 1 | 1 |
| Cluster11403 | Proteobacteria                                    | 0 | 0 | 0 | 0 | 0 | 1 | 0 | 0 | 0 | 0 | 0 | 1 |
| Cluster11412 | Proteobac Betapr Burkholderiales                  | 0 | 0 | 0 | 0 | 0 | 0 | 1 | 0 | 0 | 0 | 0 | 1 |
| Cluster11419 | Proteobac Alphap Rhizobiales                      | 0 | 0 | 0 | 0 | 0 | 0 | 1 | 0 | 0 | 0 | 0 | 1 |
| Cluster11423 | Acidobact Acidobacteria_Gp1 Acidobacteriur        | 0 | 0 | 1 | 0 | 0 | 0 | 0 | 0 | 0 | 0 | 0 | 1 |
| Cluster11424 | Proteobac Gammaproteobacteria                     | 0 | 0 | 1 | 0 | 0 | 0 | 0 | 0 | 0 | 0 | 0 | 1 |
| Cluster11425 | Bacteroid SpHING Sphir SpHINGo Mucilaginibact     | 0 | 0 | 0 | 0 | 0 | 0 | 1 | 0 | 0 | 0 | 0 | 1 |
| Cluster11426 | Acidobact Acidobacteria_Gp1 Gp1                   | 0 | 0 | 0 | 0 | 0 | 0 | 1 | 0 | 0 | 0 | 0 | 1 |
| Cluster11452 | ;size=2                                           | 0 | 0 | 0 | 0 | 0 | 0 | 0 | 0 | 0 | 0 | 1 | 1 |
| Cluster11461 | ;size=6                                           | 0 | 0 | 0 | 0 | 0 | 0 | 1 | 0 | 0 | 0 | 0 | 1 |
| Cluster11470 | Proteobac Alphap Caulc Cauloba Phenyllobacter     | 0 | 0 | 0 | 0 | 0 | 0 | 1 | 0 | 0 | 0 | 0 | 1 |
| Cluster11475 | Proteobac Betapr Neiss Neisseriaceae              | 0 | 0 | 0 | 0 | 0 | 0 | 1 | 0 | 0 | 0 | 0 | 1 |
| Cluster11476 | Proteobac Betaproteobacteria                      | 0 | 1 | 0 | 0 | 0 | 0 | 0 | 0 | 0 | 0 | 0 | 1 |
| Cluster11477 | Actinobac Actinol Actinomycetales                 | 0 | 0 | 0 | 0 | 0 | 0 | 0 | 1 | 0 | 0 | 0 | 1 |
| Cluster11495 | Acidobact Acidobacteria_Gp2 Gp2                   | 0 | 0 | 0 | 0 | 0 | 1 | 0 | 0 | 0 | 0 | 0 | 1 |
| Cluster11498 | Proteobac Alphaproteobacteria                     | 0 | 0 | 0 | 0 | 0 | 0 | 0 | 0 | 0 | 1 | 0 | 1 |
| Cluster11499 | ;size=1                                           | 0 | 0 | 0 | 0 | 0 | 1 | 0 | 0 | 0 | 0 | 0 | 1 |
| Cluster11509 | Acidobact Acidobacteria_Gp1 Gp1                   | 0 | 0 | 0 | 0 | 0 | 0 | 0 | 1 | 0 | 0 | 0 | 1 |

|                                                              |   |   |   |   |   |   |   |   |   |   |   |   |   |
|--------------------------------------------------------------|---|---|---|---|---|---|---|---|---|---|---|---|---|
| Cluster11512;size=1                                          | 0 | 0 | 0 | 0 | 0 | 0 | 1 | 0 | 0 | 0 | 0 | 0 | 1 |
| Cluster11515 Chlamydi: Chlamy Chlamydiales                   | 0 | 0 | 0 | 0 | 0 | 0 | 0 | 0 | 1 | 0 | 0 | 0 | 1 |
| Cluster11519 Proteobac Alphaproteobacteria                   | 0 | 0 | 0 | 0 | 0 | 0 | 1 | 0 | 0 | 0 | 0 | 0 | 1 |
| Cluster11523 Actinobac Actinoi Actinomycetales               | 0 | 0 | 0 | 0 | 0 | 0 | 1 | 0 | 0 | 0 | 0 | 0 | 1 |
| Cluster11535 Proteobac Alpha: Rhodospirillales               | 0 | 0 | 0 | 0 | 0 | 0 | 0 | 0 | 0 | 0 | 1 | 0 | 1 |
| Cluster11545 Acidobact Acidobacteria_Gp1 Gp1                 | 0 | 0 | 0 | 0 | 0 | 0 | 1 | 0 | 0 | 0 | 0 | 0 | 1 |
| Cluster11550 Acidobact Acidobacteria_Gp1                     | 0 | 0 | 1 | 0 | 0 | 0 | 0 | 0 | 0 | 0 | 0 | 0 | 1 |
| Cluster11552 Proteobac Alpha: Rhizobiales                    | 0 | 0 | 0 | 0 | 0 | 0 | 0 | 0 | 1 | 0 | 0 | 0 | 1 |
| Cluster11558 Proteobac Gammaproteobacteria                   | 0 | 0 | 0 | 0 | 0 | 0 | 1 | 0 | 0 | 0 | 0 | 0 | 1 |
| Cluster11568 Acidobact Acidobacteria_Gp5 Gp5                 | 0 | 0 | 0 | 0 | 0 | 0 | 1 | 0 | 0 | 0 | 0 | 0 | 1 |
| Cluster11577 Proteobacteria                                  | 0 | 0 | 0 | 0 | 0 | 0 | 1 | 0 | 0 | 0 | 0 | 0 | 1 |
| Cluster11578 Verrucom Spartobacteria Spartobacteria          | 0 | 0 | 0 | 0 | 0 | 0 | 1 | 0 | 0 | 0 | 0 | 0 | 1 |
| Cluster11579;size=10                                         | 0 | 0 | 0 | 0 | 0 | 0 | 0 | 0 | 1 | 0 | 0 | 0 | 1 |
| Cluster11581 Planctom: Planct: Planct: Planctoi Planctomyces | 0 | 0 | 0 | 0 | 1 | 0 | 0 | 0 | 0 | 0 | 0 | 0 | 1 |
| Cluster11587 Acidobact Acidobacteria_Gp13 Gp13               | 0 | 0 | 0 | 0 | 1 | 0 | 0 | 0 | 0 | 0 | 0 | 0 | 1 |
| Cluster11590 Verrucom Opitutae                               | 1 | 0 | 0 | 0 | 0 | 0 | 0 | 0 | 0 | 0 | 0 | 0 | 1 |
| Cluster11600 Acidobact Acidobacteria_Gp10 Gp10               | 0 | 0 | 0 | 0 | 0 | 0 | 0 | 1 | 0 | 0 | 0 | 0 | 1 |
| Cluster11604 Acidobact Acidobacteria_Gp1 Edaphobacter        | 0 | 0 | 0 | 0 | 0 | 0 | 0 | 0 | 1 | 0 | 0 | 0 | 1 |
| Cluster11621 Acidobact Acidobacteria_Gp2 Gp2                 | 0 | 0 | 0 | 1 | 0 | 0 | 0 | 0 | 0 | 0 | 0 | 0 | 1 |
| Cluster11631 Proteobac Alpha: Rhodospirillales               | 0 | 0 | 0 | 0 | 0 | 1 | 0 | 0 | 0 | 0 | 0 | 0 | 1 |
| Cluster11641 Acidobact Acidobacteria_Gp1 Gp1                 | 1 | 0 | 0 | 0 | 0 | 0 | 0 | 0 | 0 | 0 | 0 | 0 | 1 |
| Cluster11651;size=2                                          | 0 | 0 | 0 | 0 | 0 | 0 | 0 | 0 | 1 | 0 | 0 | 0 | 1 |
| Cluster11657 Acidobact Acidobacteria_Gp7 Gp7                 | 0 | 0 | 0 | 0 | 0 | 0 | 0 | 0 | 0 | 0 | 0 | 1 | 1 |
| Cluster11659 Proteobac Alphaproteobacteria                   | 0 | 0 | 0 | 0 | 0 | 1 | 0 | 0 | 0 | 0 | 0 | 0 | 1 |
| Cluster11664 Proteobacteria                                  | 0 | 0 | 0 | 0 | 0 | 0 | 1 | 0 | 0 | 0 | 0 | 0 | 1 |
| Cluster11665 Proteobac Alpha: Rhizobiales                    | 0 | 0 | 1 | 0 | 0 | 0 | 0 | 0 | 0 | 0 | 0 | 0 | 1 |
| Cluster11671 OP11 OP11_genera_                               | 0 | 0 | 0 | 0 | 0 | 0 | 0 | 0 | 1 | 0 | 0 | 0 | 1 |
| Cluster11673 Armatimonadetes Armatimonade                    | 0 | 0 | 0 | 0 | 0 | 0 | 1 | 0 | 0 | 0 | 0 | 0 | 1 |
| Cluster11675 Chloroflex: Ktedor Ktedonobacteriales           | 0 | 0 | 0 | 0 | 0 | 0 | 0 | 0 | 1 | 0 | 0 | 0 | 1 |

|                     |                |                                    |   |   |   |   |   |   |   |   |   |   |   |
|---------------------|----------------|------------------------------------|---|---|---|---|---|---|---|---|---|---|---|
| Cluster11677        | Acidobact      | Acidobacteria_Gp1                  | 0 | 0 | 0 | 0 | 0 | 0 | 1 | 0 | 0 | 0 | 1 |
| Cluster11701        | Acidobact      | Acidobacteria_Gp1 Edaphobacter     | 0 | 0 | 0 | 0 | 0 | 0 | 0 | 1 | 0 | 0 | 1 |
| Cluster11703        | Verrucom       | Opitutu; Opitu; Opituta Opitutus   | 0 | 0 | 0 | 0 | 1 | 0 | 0 | 0 | 0 | 0 | 1 |
| Cluster11704        | Acidobact      | Acidobacteria_Gp2 Gp2              | 0 | 0 | 0 | 1 | 0 | 0 | 0 | 0 | 0 | 0 | 1 |
| Cluster11714        | Planctom       | Planct; Planc; Planctomycetaceae   | 0 | 0 | 0 | 0 | 0 | 1 | 0 | 0 | 0 | 0 | 1 |
| Cluster11721        | Proteobac      | Betapr Burk; Burkholderiaceae      | 1 | 0 | 0 | 0 | 0 | 0 | 0 | 0 | 0 | 0 | 1 |
| Cluster11728        | Acidobact      | Acidobacteria_Gp2 Gp2              | 0 | 0 | 0 | 0 | 0 | 0 | 0 | 1 | 0 | 0 | 1 |
| Cluster11729        | Proteobacteria |                                    | 0 | 0 | 0 | 0 | 0 | 0 | 0 | 1 | 0 | 0 | 1 |
| Cluster11732        | Proteobac      | Gammaproteobacteria                | 0 | 0 | 0 | 0 | 0 | 1 | 0 | 0 | 0 | 0 | 1 |
| Cluster11738        | Acidobacteria  |                                    | 0 | 0 | 0 | 0 | 1 | 0 | 0 | 0 | 0 | 0 | 1 |
| Cluster11740        | Acidobact      | Acidobacteria_Gp6 Gp6              | 0 | 0 | 0 | 0 | 0 | 1 | 0 | 0 | 0 | 0 | 1 |
| Cluster11746        | Proteobac      | Betaproteobacteria                 | 0 | 0 | 0 | 0 | 0 | 1 | 0 | 0 | 0 | 0 | 1 |
| Cluster11749        | Verrucom       | Spartobacteria Spartobacteria      | 0 | 0 | 0 | 0 | 0 | 0 | 1 | 0 | 0 | 0 | 1 |
| Cluster11750        | Proteobacteria |                                    | 0 | 0 | 0 | 0 | 1 | 0 | 0 | 0 | 0 | 0 | 1 |
| Cluster11755        | Proteobac      | Alphap Rhodospirillales            | 0 | 0 | 0 | 0 | 0 | 0 | 1 | 0 | 0 | 0 | 1 |
| Cluster11758;size=1 |                |                                    | 0 | 0 | 0 | 0 | 0 | 0 | 1 | 0 | 0 | 0 | 1 |
| Cluster11759        | Acidobact      | Acidobacteria_Gp2 Gp2              | 0 | 0 | 0 | 0 | 0 | 0 | 0 | 0 | 1 | 0 | 1 |
| Cluster11763;size=1 |                |                                    | 0 | 0 | 0 | 0 | 0 | 0 | 0 | 0 | 1 | 0 | 1 |
| Cluster11767        | Acidobact      | Acidobacteria_Gp3                  | 0 | 0 | 0 | 0 | 0 | 0 | 1 | 0 | 0 | 0 | 1 |
| Cluster11778        | Proteobac      | Alphap Rhodospirillales            | 0 | 0 | 0 | 0 | 0 | 0 | 1 | 0 | 0 | 0 | 1 |
| Cluster11780        | Proteobac      | Alphap Caul; Cauloba; Caulobacter  | 0 | 0 | 0 | 0 | 0 | 0 | 0 | 0 | 1 | 0 | 1 |
| Cluster11781        | Acidobact      | Acidobacteria_Gp2 Gp2              | 0 | 0 | 0 | 0 | 1 | 0 | 0 | 0 | 0 | 0 | 1 |
| Cluster11787        | Proteobac      | Alphap Rhodospirillales            | 0 | 0 | 0 | 0 | 0 | 0 | 0 | 0 | 1 | 0 | 1 |
| Cluster11788        | Proteobac      | Alphap Alphaproteob; Rhizomicrobiu | 0 | 0 | 1 | 0 | 0 | 0 | 0 | 0 | 0 | 0 | 1 |
| Cluster11802        | Acidobact      | Acidobacteria_Gp1                  | 1 | 0 | 0 | 0 | 0 | 0 | 0 | 0 | 0 | 0 | 1 |
| Cluster11804        | Acidobact      | Acidobacteria_Gp3                  | 0 | 0 | 0 | 0 | 1 | 0 | 0 | 0 | 0 | 0 | 1 |
| Cluster11811        | Proteobac      | Betaproteobacteria                 | 0 | 0 | 0 | 0 | 0 | 0 | 0 | 0 | 1 | 0 | 1 |
| Cluster11816        | Acidobacteria  |                                    | 0 | 0 | 0 | 0 | 0 | 0 | 1 | 0 | 0 | 0 | 1 |
| Cluster11817        | Acidobact      | Acidobacteria_Gp1 Gp1              | 0 | 0 | 0 | 0 | 1 | 0 | 0 | 0 | 0 | 0 | 1 |

|                                                          |   |   |   |   |   |   |   |   |   |   |   |   |   |
|----------------------------------------------------------|---|---|---|---|---|---|---|---|---|---|---|---|---|
| Cluster11821Acidobact Acidobacteria_Gp3 Gp3              | 0 | 0 | 0 | 0 | 0 | 0 | 0 | 0 | 0 | 1 | 0 | 0 | 1 |
| Cluster11824;size=1                                      | 0 | 0 | 0 | 0 | 1 | 0 | 0 | 0 | 0 | 0 | 0 | 0 | 1 |
| Cluster11826Acidobact Acidobacteria_Gp3 Gp3              | 0 | 0 | 0 | 0 | 1 | 0 | 0 | 0 | 0 | 0 | 0 | 0 | 1 |
| Cluster11827Proteobac Alphap Rhizobiales                 | 0 | 0 | 0 | 0 | 1 | 0 | 0 | 0 | 0 | 0 | 0 | 0 | 1 |
| Cluster11831Acidobact Acidobacteria_Gp6 Gp6              | 0 | 0 | 0 | 0 | 0 | 0 | 0 | 0 | 0 | 1 | 0 | 0 | 1 |
| Cluster11832Proteobac Deltap Bde11 Bde11 Bde11           | 0 | 0 | 0 | 0 | 0 | 0 | 0 | 0 | 0 | 1 | 0 | 0 | 1 |
| Cluster11850Acidobact Acidobacteria_Gp1                  | 0 | 0 | 1 | 0 | 0 | 0 | 0 | 0 | 0 | 0 | 0 | 0 | 1 |
| Cluster11855Proteobacteria                               | 0 | 0 | 0 | 0 | 1 | 0 | 0 | 0 | 0 | 0 | 0 | 0 | 1 |
| Cluster11860Armatimc Armati Arma Armatin Armatimonas/    | 0 | 0 | 0 | 0 | 0 | 0 | 0 | 0 | 0 | 0 | 0 | 1 | 1 |
| Cluster11863Actinobac Actinol Solirubrobacterales        | 0 | 0 | 0 | 0 | 0 | 0 | 0 | 0 | 0 | 0 | 1 | 0 | 1 |
| Cluster11865Proteobac Alphap Rhodospirillales            | 1 | 0 | 0 | 0 | 0 | 0 | 0 | 0 | 0 | 0 | 0 | 0 | 1 |
| Cluster11869;size=3                                      | 0 | 0 | 1 | 0 | 0 | 0 | 0 | 0 | 0 | 0 | 0 | 0 | 1 |
| Cluster11872Acidobact Acidobacteria_Gp2 Gp2              | 0 | 0 | 0 | 0 | 0 | 0 | 1 | 0 | 0 | 0 | 0 | 0 | 1 |
| Cluster11882Proteobac Alphap Rhizobiales                 | 0 | 0 | 0 | 0 | 1 | 0 | 0 | 0 | 0 | 0 | 0 | 0 | 1 |
| Cluster11894Acidobact Acidobacteria_Gp1 Gp1              | 0 | 0 | 0 | 0 | 0 | 0 | 0 | 0 | 0 | 0 | 0 | 1 | 1 |
| Cluster11897Acidobact Acidobacteria_Gp2 Gp2              | 0 | 0 | 0 | 0 | 0 | 0 | 1 | 0 | 0 | 0 | 0 | 0 | 1 |
| Cluster11904Proteobac Alphap Rhod Rhodos  Dongia         | 0 | 0 | 0 | 0 | 1 | 0 | 0 | 0 | 0 | 0 | 0 | 0 | 1 |
| Cluster11913Actinobac Actinobacteria                     | 0 | 1 | 0 | 0 | 0 | 0 | 0 | 0 | 0 | 0 | 0 | 0 | 1 |
| Cluster11918Proteobac Alphap Caulc Caulobz Phenylobacter | 0 | 0 | 1 | 0 | 0 | 0 | 0 | 0 | 0 | 0 | 0 | 0 | 1 |
| Cluster11919;size=3                                      | 0 | 0 | 0 | 0 | 1 | 0 | 0 | 0 | 0 | 0 | 0 | 0 | 1 |
| Cluster11920Acidobacteria                                | 0 | 0 | 0 | 0 | 1 | 0 | 0 | 0 | 0 | 0 | 0 | 0 | 1 |
| Cluster11927Proteobac Alphap Rhod Acetobacteraceae       | 0 | 0 | 0 | 0 | 0 | 0 | 0 | 0 | 0 | 1 | 0 | 0 | 1 |
| Cluster11933Acidobact Acidobacteria_Gp3                  | 0 | 0 | 0 | 0 | 0 | 0 | 1 | 0 | 0 | 0 | 0 | 0 | 1 |
| Cluster11934Proteobac Betapr Burkholderiales             | 0 | 0 | 1 | 0 | 0 | 0 | 0 | 0 | 0 | 0 | 0 | 0 | 1 |
| Cluster11939;size=3                                      | 0 | 0 | 0 | 0 | 0 | 0 | 0 | 1 | 0 | 0 | 0 | 0 | 1 |
| Cluster11940Proteobac Betapr Burkl Burkhol Burkholderia  | 0 | 0 | 0 | 0 | 1 | 0 | 0 | 0 | 0 | 0 | 0 | 0 | 1 |
| Cluster11942Acidobact Acidobacteria_Gp3                  | 0 | 0 | 0 | 0 | 0 | 0 | 0 | 0 | 0 | 1 | 0 | 0 | 1 |
| Cluster11944Proteobac Alphaproteobacteria                | 0 | 0 | 0 | 0 | 0 | 0 | 0 | 1 | 0 | 0 | 0 | 0 | 1 |
| Cluster11947;size=1                                      | 0 | 0 | 0 | 0 | 0 | 0 | 0 | 0 | 0 | 1 | 0 | 0 | 1 |













|              |                |                   |                            |   |   |   |   |   |   |   |   |   |   |   |   |
|--------------|----------------|-------------------|----------------------------|---|---|---|---|---|---|---|---|---|---|---|---|
| Cluster12802 | Acidobact      | Acidobacteria_Gp1 | Granulicella               | 0 | 0 | 1 | 0 | 0 | 0 | 0 | 0 | 0 | 0 | 0 | 1 |
| Cluster12804 | Acidobact      | Acidobacteria_Gp1 | Gp1                        | 0 | 1 | 0 | 0 | 0 | 0 | 0 | 0 | 0 | 0 | 0 | 1 |
| Cluster12810 | Acidobact      | Acidobacteria_Gp1 | Acidobacteriur             | 1 | 0 | 0 | 0 | 0 | 0 | 0 | 0 | 0 | 0 | 0 | 1 |
| Cluster12820 | Proteobacteria |                   |                            | 0 | 0 | 0 | 0 | 0 | 0 | 0 | 0 | 0 | 1 | 0 | 1 |
| Cluster12822 | Acidobact      | Acidobacteria_Gp1 | Edaphobacter               | 1 | 0 | 0 | 0 | 0 | 0 | 0 | 0 | 0 | 0 | 0 | 1 |
| Cluster12824 | Acidobact      | Acidobacteria_Gp1 | Gp1                        | 0 | 0 | 0 | 0 | 0 | 0 | 0 | 0 | 0 | 1 | 0 | 1 |
| Cluster12825 | size=1         |                   |                            | 0 | 0 | 1 | 0 | 0 | 0 | 0 | 0 | 0 | 0 | 0 | 1 |
| Cluster12831 | Acidobact      | Acidobacteria_Gp2 | Gp2                        | 0 | 0 | 0 | 1 | 0 | 0 | 0 | 0 | 0 | 0 | 0 | 1 |
| Cluster12835 | size=2         |                   |                            | 0 | 0 | 0 | 1 | 0 | 0 | 0 | 0 | 0 | 0 | 0 | 1 |
| Cluster12848 | Proteobac      | Deltap            | Myxococcales               | 0 | 0 | 1 | 0 | 0 | 0 | 0 | 0 | 0 | 0 | 0 | 1 |
| Cluster12849 | size=1         |                   |                            | 0 | 0 | 0 | 0 | 0 | 0 | 0 | 0 | 0 | 0 | 1 | 1 |
| Cluster12857 | Proteobac      | Betapr            | Burkl Burkhol Burkholderia | 0 | 0 | 0 | 0 | 0 | 0 | 0 | 0 | 0 | 1 | 0 | 1 |
| Cluster12860 | Proteobac      | Betapr            | Burkl Oxalobacteraceae     | 0 | 0 | 0 | 0 | 0 | 0 | 0 | 0 | 0 | 1 | 0 | 1 |
| Cluster12864 | Proteobac      | Alphap            | Rhizc Xanthol Labrys       | 0 | 0 | 0 | 0 | 0 | 0 | 1 | 0 | 0 | 0 | 0 | 1 |
| Cluster12873 | Acidobact      | Acidobacteria_Gp1 | Gp1                        | 0 | 1 | 0 | 0 | 0 | 0 | 0 | 0 | 0 | 0 | 0 | 1 |
| Cluster12897 | Acidobact      | Acidobacteria_Gp2 | Gp2                        | 0 | 0 | 0 | 0 | 0 | 0 | 0 | 1 | 0 | 0 | 0 | 1 |
| Cluster12901 | Acidobact      | Acidobacteria_Gp1 |                            | 0 | 0 | 0 | 0 | 0 | 0 | 0 | 0 | 0 | 0 | 1 | 1 |
| Cluster12903 | Acidobact      | Acidobacteria_Gp1 |                            | 0 | 0 | 1 | 0 | 0 | 0 | 0 | 0 | 0 | 0 | 0 | 1 |
| Cluster12904 | Actinobac      | Actinol           | Solirubrobacterales        | 0 | 0 | 0 | 0 | 0 | 0 | 0 | 0 | 0 | 1 | 0 | 1 |
| Cluster12913 | Acidobact      | Acidobacteria_Gp1 | Gp1                        | 0 | 0 | 0 | 0 | 0 | 0 | 0 | 0 | 0 | 0 | 1 | 1 |
| Cluster12916 | Acidobact      | Acidobacteria_Gp3 | Gp3                        | 0 | 0 | 1 | 0 | 0 | 0 | 0 | 0 | 0 | 0 | 0 | 1 |
| Cluster12922 | Proteobacteria |                   |                            | 0 | 0 | 1 | 0 | 0 | 0 | 0 | 0 | 0 | 0 | 0 | 1 |
| Cluster12923 | Acidobact      | Acidobacteria_Gp1 |                            | 0 | 0 | 1 | 0 | 0 | 0 | 0 | 0 | 0 | 0 | 0 | 1 |
| Cluster12925 | Acidobact      | Acidobacteria_Gp2 | Gp2                        | 0 | 0 | 0 | 0 | 0 | 0 | 0 | 0 | 0 | 0 | 1 | 1 |
| Cluster12926 | Acidobact      | Acidobacteria_Gp1 | Gp1                        | 0 | 0 | 0 | 0 | 0 | 0 | 1 | 0 | 0 | 0 | 0 | 1 |
| Cluster12928 | Acidobact      | Acidobacteria_Gp3 | Bryobacter                 | 0 | 1 | 0 | 0 | 0 | 0 | 0 | 0 | 0 | 0 | 0 | 1 |
| Cluster12932 | Verrucom       | Subdivision3      | Subdivision3_ξ             | 0 | 0 | 0 | 0 | 0 | 0 | 0 | 0 | 0 | 1 | 0 | 1 |
| Cluster12933 | Proteobac      | Alphap            | Rhizc Rhizobi; Bauldia     | 0 | 0 | 0 | 0 | 0 | 0 | 0 | 0 | 0 | 0 | 1 | 1 |
| Cluster12935 | Proteobac      | Alphap            | Rhizobiales                | 0 | 0 | 0 | 0 | 0 | 0 | 0 | 0 | 0 | 1 | 0 | 1 |



















|                                                           |   |   |   |   |   |   |   |   |   |   |   |   |   |
|-----------------------------------------------------------|---|---|---|---|---|---|---|---|---|---|---|---|---|
| Cluster14007 Acidobact Acidobacteria_Gp1                  | 0 | 0 | 0 | 0 | 0 | 0 | 0 | 0 | 1 | 0 | 0 | 0 | 1 |
| Cluster14011;size=5                                       | 0 | 0 | 1 | 0 | 0 | 0 | 0 | 0 | 0 | 0 | 0 | 0 | 1 |
| Cluster14013 Chloroflex Ktedon Ktedonobacter              | 0 | 0 | 0 | 0 | 0 | 0 | 0 | 0 | 0 | 0 | 0 | 1 | 1 |
| Cluster14016 Proteobac Alphap Caulc Caulobacteraceae      | 0 | 0 | 0 | 0 | 0 | 1 | 0 | 0 | 0 | 0 | 0 | 0 | 1 |
| Cluster14017 Gemmatir Gemm Geml Gemma Gemmatimonas        | 0 | 0 | 1 | 0 | 0 | 0 | 0 | 0 | 0 | 0 | 0 | 0 | 1 |
| Cluster14019 Acidobact Acidobacteria_Gp3 Gp3              | 0 | 0 | 1 | 0 | 0 | 0 | 0 | 0 | 0 | 0 | 0 | 0 | 1 |
| Cluster14022 Proteobac Betapr Burkholderiaceae            | 0 | 0 | 1 | 0 | 0 | 0 | 0 | 0 | 0 | 0 | 0 | 0 | 1 |
| Cluster14023 Acidobact Acidobacteria_Gp1                  | 0 | 0 | 0 | 0 | 0 | 0 | 0 | 1 | 0 | 0 | 0 | 0 | 1 |
| Cluster14031 TM7 TM7_genera_i                             | 0 | 0 | 1 | 0 | 0 | 0 | 0 | 0 | 0 | 0 | 0 | 0 | 1 |
| Cluster14038 Acidobact Acidobacteria_Gp3 Gp3              | 0 | 0 | 0 | 0 | 0 | 0 | 0 | 0 | 0 | 0 | 0 | 1 | 1 |
| Cluster14039 Bacteroid Sphing Sphir Chitinophagaceae      | 0 | 0 | 1 | 0 | 0 | 0 | 0 | 0 | 0 | 0 | 0 | 0 | 1 |
| Cluster14042 Chlamydia Chlamy Chlar Parachl Parachlamydia | 0 | 0 | 0 | 0 | 0 | 0 | 0 | 0 | 0 | 0 | 0 | 1 | 1 |
| Cluster14043 Proteobac Gammaproteobacteria                | 0 | 0 | 0 | 0 | 0 | 0 | 0 | 1 | 0 | 0 | 0 | 0 | 1 |
| Cluster14046 Proteobac Gamm Xantl Sinobac Steroidobacter  | 0 | 0 | 0 | 0 | 0 | 0 | 1 | 0 | 0 | 0 | 0 | 0 | 1 |
| Cluster14048 Nitrospira Nitrosq Nitro Nitrospi Nitrospira | 0 | 0 | 0 | 0 | 0 | 0 | 0 | 0 | 0 | 0 | 0 | 1 | 1 |
| Cluster14050 Acidobact Acidobacteria_Gp1                  | 1 | 0 | 0 | 0 | 0 | 0 | 0 | 0 | 0 | 0 | 0 | 0 | 1 |
| Cluster14051 Acidobact Acidobacteria_Gp1 Gp1              | 0 | 0 | 0 | 0 | 0 | 1 | 0 | 0 | 0 | 0 | 0 | 0 | 1 |
| Cluster14055;size=3                                       | 0 | 1 | 0 | 0 | 0 | 0 | 0 | 0 | 0 | 0 | 0 | 0 | 1 |
| Cluster14057 Proteobac Betaproteobacteria                 | 0 | 0 | 1 | 0 | 0 | 0 | 0 | 0 | 0 | 0 | 0 | 0 | 1 |
| Cluster14063 Proteobac Alphaproteobacteria                | 0 | 0 | 0 | 1 | 0 | 0 | 0 | 0 | 0 | 0 | 0 | 0 | 1 |
| Cluster14064 Proteobac Deltap Myxococcales                | 0 | 0 | 0 | 0 | 0 | 0 | 1 | 0 | 0 | 0 | 0 | 0 | 1 |
| Cluster14074 Acidobact Acidobacteria_Gp3 Gp3              | 0 | 0 | 0 | 0 | 0 | 0 | 1 | 0 | 0 | 0 | 0 | 0 | 1 |
| Cluster14075 Proteobac Betapr Burkholderiales             | 0 | 0 | 1 | 0 | 0 | 0 | 0 | 0 | 0 | 0 | 0 | 0 | 1 |
| Cluster14076 Acidobact Acidobacteria_Gp1 Gp1              | 0 | 0 | 0 | 0 | 0 | 0 | 1 | 0 | 0 | 0 | 0 | 0 | 1 |
| Cluster14079 Acidobact Acidobacteria_Gp3 Gp3              | 0 | 0 | 0 | 0 | 0 | 0 | 0 | 0 | 0 | 0 | 0 | 1 | 1 |
| Cluster14080 Actinobac Actinol Actinomycetales            | 0 | 0 | 0 | 0 | 0 | 0 | 0 | 0 | 1 | 0 | 0 | 0 | 1 |
| Cluster14086;size=3                                       | 0 | 0 | 1 | 0 | 0 | 0 | 0 | 0 | 0 | 0 | 0 | 0 | 1 |
| Cluster14088 Proteobac Alphap Rhizobiales                 | 0 | 0 | 0 | 0 | 0 | 0 | 0 | 0 | 0 | 0 | 0 | 1 | 1 |
| Cluster14089 Acidobact Acidobacteria_Gp1                  | 0 | 0 | 0 | 0 | 0 | 1 | 0 | 0 | 0 | 0 | 0 | 0 | 1 |

|                                                         |   |   |   |   |   |   |   |   |   |   |   |   |   |
|---------------------------------------------------------|---|---|---|---|---|---|---|---|---|---|---|---|---|
| Cluster14093 Bacteroid Sphing Sphir Chitinophagaceae    | 0 | 0 | 0 | 0 | 0 | 0 | 0 | 1 | 0 | 0 | 0 | 0 | 1 |
| Cluster14097;size=1                                     | 0 | 0 | 0 | 0 | 0 | 0 | 0 | 0 | 1 | 0 | 0 | 0 | 1 |
| Cluster14106 Proteobac Deltaproteobacteria              | 0 | 0 | 0 | 0 | 0 | 0 | 0 | 1 | 0 | 0 | 0 | 0 | 1 |
| Cluster14110 Acidobact Acidobacteria_Gp3 Gp3            | 0 | 0 | 0 | 0 | 0 | 0 | 0 | 0 | 0 | 0 | 0 | 1 | 1 |
| Cluster14120 Planctom Planct Planc Planctomycetaceae    | 0 | 0 | 0 | 0 | 0 | 0 | 1 | 0 | 0 | 0 | 0 | 0 | 1 |
| Cluster14123 Proteobac Alphap Rhodospirillales          | 0 | 0 | 0 | 0 | 0 | 0 | 1 | 0 | 0 | 0 | 0 | 0 | 1 |
| Cluster14125;size=11                                    | 0 | 1 | 0 | 0 | 0 | 0 | 0 | 0 | 0 | 0 | 0 | 0 | 1 |
| Cluster14131 Acidobact Acidobacteria_Gp1                | 0 | 0 | 0 | 1 | 0 | 0 | 0 | 0 | 0 | 0 | 0 | 0 | 1 |
| Cluster14133 Acidobact Acidobacteria_Gp1                | 0 | 0 | 0 | 0 | 0 | 0 | 0 | 1 | 0 | 0 | 0 | 0 | 1 |
| Cluster14134 Acidobact Acidobacteria_Gp3                | 0 | 0 | 0 | 0 | 0 | 0 | 1 | 0 | 0 | 0 | 0 | 0 | 1 |
| Cluster14140 Acidobact Acidobacteria_Gp1                | 0 | 0 | 1 | 0 | 0 | 0 | 0 | 0 | 0 | 0 | 0 | 0 | 1 |
| Cluster14141 Proteobac Deltaproteobacteria              | 0 | 0 | 0 | 0 | 0 | 0 | 0 | 1 | 0 | 0 | 0 | 0 | 1 |
| Cluster14142;size=1                                     | 0 | 0 | 0 | 0 | 0 | 0 | 0 | 0 | 0 | 0 | 0 | 1 | 1 |
| Cluster14144 Acidobact Acidobacteria_Gp1 Gp1            | 1 | 0 | 0 | 0 | 0 | 0 | 0 | 0 | 0 | 0 | 0 | 0 | 1 |
| Cluster14156 Verrucom Subdivision3 Subdivision3_ξ       | 0 | 0 | 1 | 0 | 0 | 0 | 0 | 0 | 0 | 0 | 0 | 0 | 1 |
| Cluster14159 Acidobact Acidobacteria_Gp2 Gp2            | 0 | 0 | 0 | 0 | 0 | 0 | 0 | 1 | 0 | 0 | 0 | 0 | 1 |
| Cluster14166 Acidobact Acidobacteria_Gp3                | 0 | 0 | 0 | 1 | 0 | 0 | 0 | 0 | 0 | 0 | 0 | 0 | 1 |
| Cluster14178 Acidobact Acidobacteria_Gp2 Gp2            | 0 | 0 | 0 | 0 | 0 | 0 | 1 | 0 | 0 | 0 | 0 | 0 | 1 |
| Cluster14181 Acidobact Acidobacteria_Gp1                | 1 | 0 | 0 | 0 | 0 | 0 | 0 | 0 | 0 | 0 | 0 | 0 | 1 |
| Cluster14186 Proteobac Alphap Rhizc Xantho Pseudolabrys | 0 | 0 | 1 | 0 | 0 | 0 | 0 | 0 | 0 | 0 | 0 | 0 | 1 |
| Cluster14187 Acidobact Acidobacteria_Gp1 Gp1            | 0 | 0 | 0 | 0 | 0 | 0 | 0 | 0 | 1 | 0 | 0 | 0 | 1 |
| Cluster14190;size=4                                     | 0 | 0 | 1 | 0 | 0 | 0 | 0 | 0 | 0 | 0 | 0 | 0 | 1 |
| Cluster14206 Proteobac Gammaproteobacteria              | 0 | 0 | 1 | 0 | 0 | 0 | 0 | 0 | 0 | 0 | 0 | 0 | 1 |
| Cluster14225 Acidobact Acidobacteria_Gp1 Gp1            | 0 | 0 | 0 | 0 | 0 | 0 | 0 | 0 | 0 | 1 | 0 | 0 | 1 |
| Cluster14235 Acidobact Acidobacteria_Gp2 Gp2            | 0 | 0 | 0 | 0 | 0 | 0 | 0 | 0 | 0 | 0 | 0 | 1 | 1 |
| Cluster14239 Acidobact Acidobacteria_Gp1 Gp1            | 0 | 0 | 0 | 0 | 0 | 0 | 0 | 1 | 0 | 0 | 0 | 0 | 1 |
| Cluster14241;size=8                                     | 0 | 0 | 0 | 0 | 0 | 0 | 0 | 0 | 0 | 0 | 0 | 1 | 1 |
| Cluster14249 Acidobact Acidobacteria_Gp3                | 0 | 0 | 0 | 0 | 0 | 0 | 0 | 0 | 0 | 0 | 0 | 1 | 1 |
| Cluster14252 Acidobact Acidobacteria_Gp1                | 0 | 0 | 0 | 0 | 0 | 0 | 0 | 1 | 0 | 0 | 0 | 0 | 1 |







|                                                            |   |   |   |   |   |   |   |   |   |   |   |   |   |
|------------------------------------------------------------|---|---|---|---|---|---|---|---|---|---|---|---|---|
| Cluster14583;size=2                                        | 0 | 0 | 0 | 0 | 0 | 0 | 1 | 0 | 0 | 0 | 0 | 0 | 1 |
| Cluster14600 Proteobac Betapr Burk Oxalobacteraceae        | 1 | 0 | 0 | 0 | 0 | 0 | 0 | 0 | 0 | 0 | 0 | 0 | 1 |
| Cluster14605 Acidobacteria                                 | 0 | 0 | 0 | 0 | 0 | 0 | 0 | 0 | 0 | 0 | 0 | 1 | 1 |
| Cluster14613 Acidobact Acidobacteria_Gp1                   | 0 | 0 | 0 | 0 | 0 | 0 | 1 | 0 | 0 | 0 | 0 | 0 | 1 |
| Cluster14614 Proteobac Alphaproteobacteria                 | 0 | 0 | 0 | 0 | 0 | 0 | 0 | 0 | 1 | 0 | 0 | 0 | 1 |
| Cluster14615 Bacteroid Sphing Sphir Chitino Sediminibacter | 0 | 0 | 0 | 0 | 0 | 0 | 1 | 0 | 0 | 0 | 0 | 0 | 1 |
| Cluster14620 Proteobac Alpha Rhizomicrobiu                 | 0 | 0 | 0 | 0 | 1 | 0 | 0 | 0 | 0 | 0 | 0 | 0 | 1 |
| Cluster14623 Acidobact Acidobacteria_Gp2 Gp2               | 0 | 0 | 1 | 0 | 0 | 0 | 0 | 0 | 0 | 0 | 0 | 0 | 1 |
| Cluster14631 Acidobact Acidobacteria_Gp1                   | 0 | 0 | 0 | 0 | 0 | 0 | 1 | 0 | 0 | 0 | 0 | 0 | 1 |
| Cluster14632 Acidobact Acidobacteria_Gp1                   | 0 | 0 | 1 | 0 | 0 | 0 | 0 | 0 | 0 | 0 | 0 | 0 | 1 |
| Cluster14651 Proteobac Deltaproteobacteria                 | 0 | 0 | 0 | 0 | 0 | 0 | 1 | 0 | 0 | 0 | 0 | 0 | 1 |
| Cluster14660 Acidobact Acidobacteria_Gp2 Gp2               | 0 | 0 | 0 | 0 | 0 | 0 | 1 | 0 | 0 | 0 | 0 | 0 | 1 |
| Cluster14662 Chloroflex Ktedon Ktedon Ktedonobacter        | 0 | 0 | 0 | 0 | 1 | 0 | 0 | 0 | 0 | 0 | 0 | 0 | 1 |
| Cluster14670 Acidobact Acidobacteria_Gp1 Acidobacteriu     | 0 | 0 | 0 | 0 | 0 | 0 | 0 | 0 | 0 | 0 | 0 | 1 | 1 |
| Cluster14672 Proteobac Alpha Rhod Acetobacteraceae         | 0 | 0 | 0 | 0 | 0 | 0 | 1 | 0 | 0 | 0 | 0 | 0 | 1 |
| Cluster14676 Verrucom Spartobacteria Spartobacteria        | 0 | 0 | 0 | 0 | 0 | 0 | 1 | 0 | 0 | 0 | 0 | 0 | 1 |
| Cluster14677 Actinobac Actin Solir Conexib Conexibacter    | 0 | 0 | 0 | 0 | 0 | 0 | 0 | 0 | 0 | 1 | 0 | 0 | 1 |
| Cluster14687 Proteobac Alpha Rhiz Beijerinckiaaceae        | 0 | 0 | 0 | 0 | 0 | 0 | 1 | 0 | 0 | 0 | 0 | 0 | 1 |
| Cluster14689;size=3                                        | 0 | 0 | 0 | 0 | 1 | 0 | 0 | 0 | 0 | 0 | 0 | 0 | 1 |
| Cluster14692 Acidobact Acidobacteria_Gp1                   | 1 | 0 | 0 | 0 | 0 | 0 | 0 | 0 | 0 | 0 | 0 | 0 | 1 |
| Cluster14693 Acidobact Acidobacteria_Gp1                   | 0 | 0 | 0 | 0 | 1 | 0 | 0 | 0 | 0 | 0 | 0 | 0 | 1 |
| Cluster14694 Proteobacteria                                | 0 | 0 | 0 | 0 | 0 | 0 | 0 | 0 | 0 | 0 | 0 | 1 | 1 |
| Cluster14707;size=5                                        | 0 | 0 | 1 | 0 | 0 | 0 | 0 | 0 | 0 | 0 | 0 | 0 | 1 |
| Cluster14714;size=3                                        | 0 | 0 | 0 | 0 | 0 | 0 | 0 | 1 | 0 | 0 | 0 | 0 | 1 |
| Cluster14719 Acidobact Acidobacteria_Gp1                   | 0 | 0 | 0 | 0 | 0 | 0 | 0 | 0 | 0 | 0 | 0 | 1 | 1 |
| Cluster14721 Acidobact Acidobacteria_Gp1 Gp1               | 0 | 0 | 1 | 0 | 0 | 0 | 0 | 0 | 0 | 0 | 0 | 0 | 1 |
| Cluster14725 Proteobac Alpha Rhod Acetob Acidocella        | 0 | 0 | 0 | 1 | 0 | 0 | 0 | 0 | 0 | 0 | 0 | 0 | 1 |
| Cluster14727 Proteobac Alpha Rhizobiales                   | 0 | 0 | 1 | 0 | 0 | 0 | 0 | 0 | 0 | 0 | 0 | 0 | 1 |
| Cluster14737 Proteobac Alpha Rhiz Xantho Labrys            | 0 | 0 | 0 | 0 | 0 | 0 | 0 | 0 | 1 | 0 | 0 | 0 | 1 |



|                                                               |   |   |   |   |   |   |   |   |   |   |   |   |   |
|---------------------------------------------------------------|---|---|---|---|---|---|---|---|---|---|---|---|---|
| Cluster14926;size=2                                           | 0 | 0 | 0 | 0 | 0 | 0 | 1 | 0 | 0 | 0 | 0 | 0 | 1 |
| Cluster14933 Proteobac Deltap Bdeli Bdellovi Bdellovibrio     | 0 | 0 | 0 | 0 | 0 | 0 | 0 | 1 | 0 | 0 | 0 | 0 | 1 |
| Cluster14935 Acidobact Acidobacteria_Gp7 Gp7                  | 0 | 0 | 0 | 0 | 0 | 0 | 0 | 0 | 0 | 0 | 0 | 1 | 1 |
| Cluster14939 Acidobact Acidobacteria_Gp1                      | 0 | 1 | 0 | 0 | 0 | 0 | 0 | 0 | 0 | 0 | 0 | 0 | 1 |
| Cluster14943 Acidobact Acidobacteria_Gp2 Gp2                  | 0 | 0 | 0 | 0 | 0 | 0 | 1 | 0 | 0 | 0 | 0 | 0 | 1 |
| Cluster14946;size=4                                           | 0 | 0 | 0 | 0 | 0 | 0 | 0 | 1 | 0 | 0 | 0 | 0 | 1 |
| Cluster14948 Proteobac Deltaproteobacteria                    | 0 | 0 | 0 | 0 | 0 | 0 | 0 | 1 | 0 | 0 | 0 | 0 | 1 |
| Cluster14953 Actinobac Actinobacteria                         | 0 | 0 | 0 | 0 | 0 | 0 | 0 | 0 | 1 | 0 | 0 | 0 | 1 |
| Cluster14971 Proteobac Betapr Burkl Oxalobacteraceae          | 0 | 0 | 0 | 0 | 0 | 0 | 1 | 0 | 0 | 0 | 0 | 0 | 1 |
| Cluster14978;size=3                                           | 0 | 0 | 0 | 0 | 0 | 0 | 0 | 1 | 0 | 0 | 0 | 0 | 1 |
| Cluster14989 Acidobact Acidobacteria_Gp1 Gp1                  | 0 | 0 | 0 | 0 | 0 | 0 | 0 | 0 | 1 | 0 | 0 | 0 | 1 |
| Cluster15000 Acidobact Acidobacteria_Gp3 Gp3                  | 0 | 0 | 1 | 0 | 0 | 0 | 0 | 0 | 0 | 0 | 0 | 0 | 1 |
| Cluster15001;size=1                                           | 0 | 0 | 0 | 0 | 0 | 0 | 1 | 0 | 0 | 0 | 0 | 0 | 1 |
| Cluster15008 Acidobacteria                                    | 0 | 0 | 0 | 0 | 1 | 0 | 0 | 0 | 0 | 0 | 0 | 0 | 1 |
| Cluster15019;size=1                                           | 0 | 0 | 0 | 0 | 0 | 0 | 0 | 1 | 0 | 0 | 0 | 0 | 1 |
| Cluster15023 Acidobact Acidobacteria_Gp3 Gp3                  | 0 | 0 | 0 | 0 | 0 | 0 | 0 | 1 | 0 | 0 | 0 | 0 | 1 |
| Cluster15039 Gemmatir Gemm Geml Gemma Gemmatimonas            | 0 | 0 | 0 | 0 | 1 | 0 | 0 | 0 | 0 | 0 | 0 | 0 | 1 |
| Cluster15040 Proteobac Alphap Rhod Rhodospirillaceae          | 0 | 0 | 0 | 0 | 0 | 0 | 0 | 1 | 0 | 0 | 0 | 0 | 1 |
| Cluster15041 Actinobac Actinol Acidi Acidimii Aciditerrimonas | 0 | 0 | 0 | 0 | 0 | 0 | 0 | 1 | 0 | 0 | 0 | 0 | 1 |
| Cluster15047 Acidobact Acidobacteria_Gp1                      | 0 | 0 | 0 | 0 | 1 | 0 | 0 | 0 | 0 | 0 | 0 | 0 | 1 |
| Cluster15051 Acidobact Acidobacteria_Gp3 Gp3                  | 0 | 0 | 0 | 0 | 0 | 0 | 0 | 0 | 1 | 0 | 0 | 0 | 1 |
| Cluster15052 Planctom Planct Planc Plancto Zavarzinella       | 0 | 0 | 0 | 0 | 0 | 0 | 0 | 1 | 0 | 0 | 0 | 0 | 1 |
| Cluster15053 Proteobac Betaproteobacteria                     | 0 | 0 | 0 | 0 | 1 | 0 | 0 | 0 | 0 | 0 | 0 | 0 | 1 |
| Cluster15062;size=1                                           | 0 | 0 | 0 | 0 | 0 | 0 | 0 | 0 | 0 | 0 | 0 | 1 | 1 |
| Cluster15063 Proteobac Gamm Xanti Sinobac Steroidobacter      | 0 | 0 | 0 | 0 | 0 | 0 | 0 | 0 | 0 | 0 | 1 | 0 | 1 |
| Cluster15068;size=2                                           | 0 | 0 | 1 | 0 | 0 | 0 | 0 | 0 | 0 | 0 | 0 | 0 | 1 |
| Cluster15070 Acidobact Acidobacteria_Gp2 Gp2                  | 0 | 0 | 0 | 0 | 0 | 0 | 0 | 0 | 0 | 0 | 1 | 0 | 1 |
| Cluster15076 Acidobact Acidobacteria_Gp2 Gp2                  | 0 | 1 | 0 | 0 | 0 | 0 | 0 | 0 | 0 | 0 | 0 | 0 | 1 |
| Cluster15077;size=1                                           | 0 | 0 | 0 | 0 | 0 | 0 | 1 | 0 | 0 | 0 | 0 | 0 | 1 |

|                                                               |   |   |   |   |   |   |   |   |   |   |   |   |   |
|---------------------------------------------------------------|---|---|---|---|---|---|---|---|---|---|---|---|---|
| Cluster15078 Proteobac Gamm Legio Coxiella Coxiella           | 0 | 0 | 0 | 0 | 0 | 0 | 1 | 0 | 0 | 0 | 0 | 0 | 1 |
| Cluster15080 Acidobact Acidobacteria_Gp2 Gp2                  | 0 | 0 | 0 | 0 | 0 | 0 | 1 | 0 | 0 | 0 | 0 | 0 | 1 |
| Cluster15083 Acidobact Acidobacteria_Gp10 Gp10                | 0 | 0 | 0 | 1 | 0 | 0 | 0 | 0 | 0 | 0 | 0 | 0 | 1 |
| Cluster15096 Proteobac Alphaproteobacteria                    | 0 | 0 | 0 | 0 | 1 | 0 | 0 | 0 | 0 | 0 | 0 | 0 | 1 |
| Cluster15097 Nitrospira Nitrospir Nitro Nitrospira Nitrospira | 0 | 1 | 0 | 0 | 0 | 0 | 0 | 0 | 0 | 0 | 0 | 0 | 1 |
| Cluster15108 Acidobact Acidobacteria_Gp2 Gp2                  | 0 | 1 | 0 | 0 | 0 | 0 | 0 | 0 | 0 | 0 | 0 | 0 | 1 |
| Cluster15140 Acidobact Acidobacteria_Gp3 Gp3                  | 0 | 0 | 0 | 0 | 0 | 0 | 1 | 0 | 0 | 0 | 0 | 0 | 1 |
| Cluster15142;size=1                                           | 0 | 0 | 0 | 0 | 0 | 0 | 0 | 0 | 0 | 0 | 0 | 1 | 1 |
| Cluster15143 Acidobact Acidobacteria_Gp2 Gp2                  | 0 | 0 | 0 | 1 | 0 | 0 | 0 | 0 | 0 | 0 | 0 | 0 | 1 |
| Cluster15149;size=7                                           | 0 | 0 | 0 | 1 | 0 | 0 | 0 | 0 | 0 | 0 | 0 | 0 | 1 |
| Cluster15161 Actinobac Actinol Acidimicrobiales               | 0 | 1 | 0 | 0 | 0 | 0 | 0 | 0 | 0 | 0 | 0 | 0 | 1 |
| Cluster15170 Acidobact Acidobacteria_Gp1                      | 0 | 0 | 1 | 0 | 0 | 0 | 0 | 0 | 0 | 0 | 0 | 0 | 1 |
| Cluster15173 Proteobac Deltaproteobacteria                    | 0 | 0 | 0 | 0 | 0 | 0 | 1 | 0 | 0 | 0 | 0 | 0 | 1 |
| Cluster15182 Proteobac Alphap Rhizc Bradyrhizobiaceae         | 0 | 0 | 0 | 0 | 0 | 0 | 1 | 0 | 0 | 0 | 0 | 0 | 1 |
| Cluster15185 Verrucom Opirit: Opirit Opirituta Opiritutus     | 0 | 0 | 1 | 0 | 0 | 0 | 0 | 0 | 0 | 0 | 0 | 0 | 1 |
| Cluster15187 Acidobact Acidobacteria_Gp2 Gp2                  | 0 | 0 | 0 | 0 | 0 | 0 | 0 | 1 | 0 | 0 | 0 | 0 | 1 |
| Cluster15188 Proteobac Gamm Xantl Sinobac Steroidobacter      | 0 | 0 | 0 | 0 | 0 | 0 | 1 | 0 | 0 | 0 | 0 | 0 | 1 |
| Cluster15193 Actinobac Actinol Actinomycetales                | 0 | 0 | 0 | 0 | 0 | 0 | 1 | 0 | 0 | 0 | 0 | 0 | 1 |
| Cluster15195 Proteobac Alphap Rhod Acetob: Acidisphaera       | 0 | 0 | 1 | 0 | 0 | 0 | 0 | 0 | 0 | 0 | 0 | 0 | 1 |
| Cluster15199;size=2                                           | 1 | 0 | 0 | 0 | 0 | 0 | 0 | 0 | 0 | 0 | 0 | 0 | 1 |
| Cluster15201 Verrucom Opirit: Opirit Opirituta Opiritutus     | 0 | 1 | 0 | 0 | 0 | 0 | 0 | 0 | 0 | 0 | 0 | 0 | 1 |
| Cluster15204;size=2                                           | 0 | 0 | 0 | 0 | 0 | 0 | 1 | 0 | 0 | 0 | 0 | 0 | 1 |
| Cluster15207 Bacteroid Sphing Sphir Chitinophagaceae          | 0 | 0 | 0 | 0 | 0 | 0 | 0 | 0 | 1 | 0 | 0 | 0 | 1 |
| Cluster15215 Proteobac Gamm Xantl Sinobac Steroidobacter      | 0 | 0 | 0 | 0 | 0 | 0 | 0 | 0 | 0 | 1 | 0 | 0 | 1 |
| Cluster15216 Proteobac Alphap Sphir Sphingomonadaceae         | 0 | 0 | 0 | 0 | 0 | 0 | 0 | 1 | 0 | 0 | 0 | 0 | 1 |
| Cluster15219 Proteobac Gamm Xantl Sinobac Nevskia             | 0 | 0 | 0 | 0 | 0 | 0 | 0 | 0 | 0 | 0 | 1 | 0 | 1 |
| Cluster15230 Proteobac Deltap Bdell Bdellovi Bdellovibrio     | 0 | 1 | 0 | 0 | 0 | 0 | 0 | 0 | 0 | 0 | 0 | 0 | 1 |
| Cluster15237 Chloroflex Ktedor Ktedonobacterales              | 0 | 0 | 0 | 0 | 0 | 0 | 1 | 0 | 0 | 0 | 0 | 0 | 1 |
| Cluster15239 Armatimc Chthor Chth: Chthon: Chthonomona:       | 0 | 0 | 0 | 0 | 0 | 0 | 0 | 1 | 0 | 0 | 0 | 0 | 1 |

|                                                             |   |   |   |   |   |   |   |   |   |   |   |   |   |
|-------------------------------------------------------------|---|---|---|---|---|---|---|---|---|---|---|---|---|
| Cluster15240 Acidobact Acidobacteria_Gp2 Gp2                | 0 | 0 | 1 | 0 | 0 | 0 | 0 | 0 | 0 | 0 | 0 | 0 | 1 |
| Cluster15246;size=1                                         | 1 | 0 | 0 | 0 | 0 | 0 | 0 | 0 | 0 | 0 | 0 | 0 | 1 |
| Cluster15248 Bacteroid Sphing Sphir Chitinoꝝ Flavihumibacte | 1 | 0 | 0 | 0 | 0 | 0 | 0 | 0 | 0 | 0 | 0 | 0 | 1 |
| Cluster15250 Acidobact Acidobacteria_Gp1                    | 1 | 0 | 0 | 0 | 0 | 0 | 0 | 0 | 0 | 0 | 0 | 0 | 1 |
| Cluster15252 Proteobac Alphap Rhizobiales                   | 1 | 0 | 0 | 0 | 0 | 0 | 0 | 0 | 0 | 0 | 0 | 0 | 1 |
| Cluster15256;size=2                                         | 1 | 0 | 0 | 0 | 0 | 0 | 0 | 0 | 0 | 0 | 0 | 0 | 1 |
| Cluster15261 Acidobact Acidobacteria_Gp10 Gp10              | 1 | 0 | 0 | 0 | 0 | 0 | 0 | 0 | 0 | 0 | 0 | 0 | 1 |
| Cluster15263 Acidobact Acidobacteria_Gp1                    | 1 | 0 | 0 | 0 | 0 | 0 | 0 | 0 | 0 | 0 | 0 | 0 | 1 |
| Cluster15265 Proteobac Alphap Rhod Acetobacteraceae         | 1 | 0 | 0 | 0 | 0 | 0 | 0 | 0 | 0 | 0 | 0 | 0 | 1 |
| Cluster15267 Proteobac Alphap Rhizobiales                   | 1 | 0 | 0 | 0 | 0 | 0 | 0 | 0 | 0 | 0 | 0 | 0 | 1 |
| Cluster15268 Proteobac Alphap Rhodospirillales              | 0 | 0 | 0 | 0 | 0 | 0 | 0 | 0 | 0 | 0 | 0 | 1 | 1 |
| Cluster15270 Acidobact Acidobacteria_Gp2 Gp2                | 1 | 0 | 0 | 0 | 0 | 0 | 0 | 0 | 0 | 0 | 0 | 0 | 1 |
| Cluster15275 Proteobac Alphaproteobacteria                  | 0 | 0 | 0 | 0 | 0 | 0 | 0 | 0 | 0 | 1 | 0 | 0 | 1 |
| Cluster15278 Proteobacteria                                 | 0 | 0 | 0 | 0 | 0 | 0 | 1 | 0 | 0 | 0 | 0 | 0 | 1 |
| Cluster15280 Acidobact Acidobacteria_Gp1 Gp1                | 0 | 0 | 0 | 0 | 0 | 0 | 1 | 0 | 0 | 0 | 0 | 0 | 1 |
| Cluster15283 Acidobact Acidobacteria_Gp2 Gp2                | 1 | 0 | 0 | 0 | 0 | 0 | 0 | 0 | 0 | 0 | 0 | 0 | 1 |
| Cluster15285;size=4                                         | 0 | 0 | 0 | 0 | 0 | 0 | 0 | 0 | 0 | 0 | 1 | 0 | 1 |
| Cluster15286 Armatimonadetes Armatimonade                   | 1 | 0 | 0 | 0 | 0 | 0 | 0 | 0 | 0 | 0 | 0 | 0 | 1 |
| Cluster15290 Proteobac Gammaproteobacteria                  | 1 | 0 | 0 | 0 | 0 | 0 | 0 | 0 | 0 | 0 | 0 | 0 | 1 |
| Cluster15296;size=1                                         | 1 | 0 | 0 | 0 | 0 | 0 | 0 | 0 | 0 | 0 | 0 | 0 | 1 |
| Cluster15298 Verrucom Opitut: Opiti Opituta Opitutus        | 0 | 0 | 0 | 0 | 0 | 0 | 0 | 0 | 0 | 0 | 0 | 1 | 1 |
| Cluster15300 Proteobac Alphap Rhodospirillales              | 0 | 0 | 0 | 0 | 0 | 0 | 0 | 0 | 0 | 0 | 0 | 1 | 1 |
| Cluster15301 Proteobac Betaproteobacteria                   | 0 | 0 | 0 | 0 | 0 | 0 | 1 | 0 | 0 | 0 | 0 | 0 | 1 |
| Cluster15302 Bacteroid Sphing Sphir Chitinophagaceae        | 0 | 0 | 0 | 0 | 0 | 0 | 0 | 1 | 0 | 0 | 0 | 0 | 1 |
| Cluster15306 Proteobac Gammaproteobacteria                  | 1 | 0 | 0 | 0 | 0 | 0 | 0 | 0 | 0 | 0 | 0 | 0 | 1 |
| Cluster15309 Acidobact Acidobacteria_Gp1                    | 1 | 0 | 0 | 0 | 0 | 0 | 0 | 0 | 0 | 0 | 0 | 0 | 1 |
| Cluster15314 Acidobacteria                                  | 0 | 0 | 0 | 0 | 0 | 0 | 1 | 0 | 0 | 0 | 0 | 0 | 1 |
| Cluster15320 Proteobac Betapr Burkl Burkhol Burkholderia    | 1 | 0 | 0 | 0 | 0 | 0 | 0 | 0 | 0 | 0 | 0 | 0 | 1 |
| Cluster15323 Proteobac Alphaproteobacteria                  | 0 | 0 | 0 | 0 | 0 | 0 | 0 | 1 | 0 | 0 | 0 | 0 | 1 |



|              |                 |                     |                         |   |   |   |   |   |   |   |   |   |   |   |   |
|--------------|-----------------|---------------------|-------------------------|---|---|---|---|---|---|---|---|---|---|---|---|
| Cluster15425 | Armatimonadetes | Armatimonade        | 0                       | 0 | 0 | 0 | 0 | 0 | 1 | 0 | 0 | 0 | 0 | 0 | 1 |
| Cluster15429 | Acidobact       | Acidobacteria_Gp5   | Gp5                     | 0 | 0 | 0 | 0 | 0 | 0 | 1 | 0 | 0 | 0 | 0 | 1 |
| Cluster15434 | Proteobac       | Alphaproteobacteria |                         | 0 | 0 | 0 | 0 | 0 | 0 | 1 | 0 | 0 | 0 | 0 | 1 |
| Cluster15436 | Acidobact       | Acidobacteria_Gp2   | Gp2                     | 0 | 0 | 1 | 0 | 0 | 0 | 0 | 0 | 0 | 0 | 0 | 1 |
| Cluster15453 | Proteobac       | Gamm Xanti          | Xanthomonadaceae        | 0 | 0 | 0 | 0 | 1 | 0 | 0 | 0 | 0 | 0 | 0 | 1 |
| Cluster15467 | Acidobact       | Acidobacteria_Gp2   | Gp2                     | 0 | 0 | 0 | 0 | 0 | 1 | 0 | 0 | 0 | 0 | 0 | 1 |
| Cluster15474 | Proteobac       | Deltap              | Myxococcales            | 0 | 0 | 0 | 0 | 0 | 0 | 0 | 0 | 0 | 0 | 1 | 1 |
| Cluster15477 | Acidobact       | Acidobacteria_Gp1   |                         | 0 | 0 | 0 | 0 | 0 | 1 | 0 | 0 | 0 | 0 | 0 | 1 |
| Cluster15478 | Actinobac       | Actinol             | Actinomycetales         | 0 | 0 | 1 | 0 | 0 | 0 | 0 | 0 | 0 | 0 | 0 | 1 |
| Cluster15482 | Proteobac       | Alphaproteobacteria |                         | 0 | 0 | 0 | 0 | 0 | 1 | 0 | 0 | 0 | 0 | 0 | 1 |
| Cluster15484 | Acidobact       | Acidobacteria_Gp1   | Gp1                     | 0 | 0 | 0 | 0 | 0 | 1 | 0 | 0 | 0 | 0 | 0 | 1 |
| Cluster15485 | ;size=1         |                     |                         | 0 | 0 | 0 | 0 | 0 | 0 | 0 | 0 | 0 | 0 | 1 | 1 |
| Cluster15497 | Proteobac       | Deltaproteobacteria |                         | 0 | 0 | 0 | 1 | 0 | 0 | 0 | 0 | 0 | 0 | 0 | 1 |
| Cluster15500 | Chlamydi        | Chlamy              | Chlar Parachlamydiaceae | 1 | 0 | 0 | 0 | 0 | 0 | 0 | 0 | 0 | 0 | 0 | 1 |
| Cluster15504 | Acidobact       | Acidobacteria_Gp1   |                         | 0 | 0 | 0 | 0 | 0 | 0 | 1 | 0 | 0 | 0 | 0 | 1 |
| Cluster15513 | ;size=1         |                     |                         | 0 | 0 | 0 | 0 | 0 | 0 | 1 | 0 | 0 | 0 | 0 | 1 |
| Cluster15514 | Proteobacteria  |                     |                         | 0 | 1 | 0 | 0 | 0 | 0 | 0 | 0 | 0 | 0 | 0 | 1 |
| Cluster15516 | Proteobac       | Gamm Pseu           | Pseudor Rugamonas       | 1 | 0 | 0 | 0 | 0 | 0 | 0 | 0 | 0 | 0 | 0 | 1 |
| Cluster15518 | ;size=3         |                     |                         | 0 | 0 | 0 | 0 | 0 | 0 | 1 | 0 | 0 | 0 | 0 | 1 |
| Cluster15519 | ;size=2         |                     |                         | 0 | 0 | 1 | 0 | 0 | 0 | 0 | 0 | 0 | 0 | 0 | 1 |
| Cluster15520 | Proteobac       | Gamm Xanti          | Sinobac Steroidobacter  | 1 | 0 | 0 | 0 | 0 | 0 | 0 | 0 | 0 | 0 | 0 | 1 |
| Cluster15521 | Acidobact       | Acidobacteria_Gp1   |                         | 1 | 0 | 0 | 0 | 0 | 0 | 0 | 0 | 0 | 0 | 0 | 1 |
| Cluster15523 | Proteobac       | Gammaproteobacteria |                         | 1 | 0 | 0 | 0 | 0 | 0 | 0 | 0 | 0 | 0 | 0 | 1 |
| Cluster15525 | ;size=1         |                     |                         | 0 | 0 | 0 | 0 | 0 | 0 | 1 | 0 | 0 | 0 | 0 | 1 |
| Cluster15527 | ;size=1         |                     |                         | 1 | 0 | 0 | 0 | 0 | 0 | 0 | 0 | 0 | 0 | 0 | 1 |
| Cluster15532 | Acidobact       | Acidobacteria_Gp2   | Gp2                     | 0 | 0 | 0 | 1 | 0 | 0 | 0 | 0 | 0 | 0 | 0 | 1 |
| Cluster15533 | Chlamydi        | Chlamy              | Chlamydiales            | 0 | 0 | 0 | 0 | 0 | 1 | 0 | 0 | 0 | 0 | 0 | 1 |
| Cluster15541 | Acidobact       | Acidobacteria_Gp3   | Bryobacter              | 0 | 0 | 0 | 0 | 0 | 0 | 1 | 0 | 0 | 0 | 0 | 1 |
| Cluster15547 | Acidobact       | Acidobacteria_Gp1   | Gp1                     | 0 | 0 | 0 | 0 | 0 | 1 | 0 | 0 | 0 | 0 | 0 | 1 |

|                                                               |   |   |   |   |   |   |   |   |   |   |   |   |   |
|---------------------------------------------------------------|---|---|---|---|---|---|---|---|---|---|---|---|---|
| Cluster15552 Acidobact Acidobacteria_Gp3                      | 0 | 0 | 0 | 0 | 0 | 0 | 0 | 1 | 0 | 0 | 0 | 0 | 1 |
| Cluster15557 Proteobac Deltaproteobacteria                    | 0 | 0 | 0 | 0 | 0 | 0 | 0 | 0 | 0 | 0 | 0 | 1 | 1 |
| Cluster15562 Acidobact Acidobacteria_Gp2 Gp2                  | 1 | 0 | 0 | 0 | 0 | 0 | 0 | 0 | 0 | 0 | 0 | 0 | 1 |
| Cluster15563 Proteobac Alphap Sphir Sphingomonadaceae         | 1 | 0 | 0 | 0 | 0 | 0 | 0 | 0 | 0 | 0 | 0 | 0 | 1 |
| Cluster15564;size=1                                           | 1 | 0 | 0 | 0 | 0 | 0 | 0 | 0 | 0 | 0 | 0 | 0 | 1 |
| Cluster15568 Acidobact Acidobacteria_Gp1                      | 0 | 0 | 0 | 0 | 0 | 0 | 0 | 0 | 1 | 0 | 0 | 0 | 1 |
| Cluster15571;size=1                                           | 0 | 0 | 0 | 0 | 0 | 0 | 0 | 1 | 0 | 0 | 0 | 0 | 1 |
| Cluster15574;size=2                                           | 0 | 0 | 0 | 1 | 0 | 0 | 0 | 0 | 0 | 0 | 0 | 0 | 1 |
| Cluster15583 Acidobact Acidobacteria_Gp2 Gp2                  | 0 | 0 | 0 | 0 | 0 | 0 | 0 | 1 | 0 | 0 | 0 | 0 | 1 |
| Cluster15589 Verrucom Opitut: Opitu Opituta Opitutus          | 0 | 0 | 0 | 0 | 0 | 0 | 1 | 0 | 0 | 0 | 0 | 0 | 1 |
| Cluster15594 Proteobac Alphap Rhizobiales                     | 0 | 1 | 0 | 0 | 0 | 0 | 0 | 0 | 0 | 0 | 0 | 0 | 1 |
| Cluster15597;size=3                                           | 0 | 0 | 1 | 0 | 0 | 0 | 0 | 0 | 0 | 0 | 0 | 0 | 1 |
| Cluster15602 Acidobact Acidobacteria_Gp2 Gp2                  | 0 | 0 | 0 | 0 | 0 | 0 | 0 | 1 | 0 | 0 | 0 | 0 | 1 |
| Cluster15604 Acidobact Acidobacteria_Gp2 Gp2                  | 0 | 0 | 0 | 0 | 0 | 0 | 0 | 0 | 0 | 0 | 1 | 0 | 1 |
| Cluster15605 Bacteroid Sphing Sphir Chitinophagaceae          | 0 | 1 | 0 | 0 | 0 | 0 | 0 | 0 | 0 | 0 | 0 | 0 | 1 |
| Cluster15623 Acidobact Acidobacteria_Gp1 Gp1                  | 0 | 1 | 0 | 0 | 0 | 0 | 0 | 0 | 0 | 0 | 0 | 0 | 1 |
| Cluster15630 Actinobac Actino1 Soliru Solirubr Solirubrobacte | 0 | 0 | 0 | 0 | 0 | 0 | 1 | 0 | 0 | 0 | 0 | 0 | 1 |
| Cluster15636;size=2                                           | 0 | 0 | 0 | 0 | 0 | 0 | 0 | 1 | 0 | 0 | 0 | 0 | 1 |
| Cluster15641 Proteobac Betapr Burkl Oxalobacteraceae          | 0 | 0 | 0 | 0 | 0 | 0 | 0 | 1 | 0 | 0 | 0 | 0 | 1 |
| Cluster15642;size=1                                           | 0 | 0 | 0 | 0 | 0 | 0 | 1 | 0 | 0 | 0 | 0 | 0 | 1 |
| Cluster15644;size=2                                           | 0 | 0 | 0 | 1 | 0 | 0 | 0 | 0 | 0 | 0 | 0 | 0 | 1 |
| Cluster15647;size=2                                           | 0 | 0 | 0 | 0 | 1 | 0 | 0 | 0 | 0 | 0 | 0 | 0 | 1 |
| Cluster15657;size=4                                           | 0 | 0 | 0 | 0 | 0 | 0 | 0 | 0 | 0 | 1 | 0 | 0 | 1 |
| Cluster15662;size=4                                           | 0 | 0 | 0 | 1 | 0 | 0 | 0 | 0 | 0 | 0 | 0 | 0 | 1 |
| Cluster15666 Firmicute: Bacilli Bacill Paeniba Paenibacillus  | 0 | 0 | 0 | 0 | 0 | 0 | 0 | 1 | 0 | 0 | 0 | 0 | 1 |
| Cluster15669 Proteobac Gamm Legio Legione Legionella          | 0 | 0 | 0 | 0 | 0 | 0 | 1 | 0 | 0 | 0 | 0 | 0 | 1 |
| Cluster15675 Bacteroid Sphing Sphir Chitinophagaceae          | 0 | 0 | 0 | 0 | 0 | 0 | 0 | 1 | 0 | 0 | 0 | 0 | 1 |
| Cluster15682 Proteobac Alphap Rhizc Xanthol Pseudolabrys      | 0 | 0 | 0 | 0 | 0 | 0 | 1 | 0 | 0 | 0 | 0 | 0 | 1 |
| Cluster15693;size=1                                           | 0 | 0 | 0 | 0 | 0 | 0 | 1 | 0 | 0 | 0 | 0 | 0 | 1 |



|              |                |                     |                        |          |   |   |   |   |   |   |   |   |   |   |   |   |
|--------------|----------------|---------------------|------------------------|----------|---|---|---|---|---|---|---|---|---|---|---|---|
| Cluster15694 | Acidobact      | Acidobacteria_Gp1   | Gp1                    | 0        | 0 | 0 | 0 | 0 | 0 | 1 | 0 | 0 | 0 | 0 | 1 |   |
| Cluster15696 | Acidobact      | Acidobacteria_Gp2   | Gp2                    | 0        | 0 | 0 | 0 | 0 | 0 | 0 | 0 | 0 | 0 | 1 | 1 |   |
| Cluster15697 | Acidobact      | Acidobacteria_Gp1   | Gp1                    | 0        | 0 | 0 | 0 | 0 | 0 | 1 | 0 | 0 | 0 | 0 | 1 |   |
| Cluster15705 | Verrucom       | Opitut: Opitu       | Opituta                | Opitutus | 0 | 0 | 0 | 0 | 0 | 0 | 1 | 0 | 0 | 0 | 0 | 1 |
| Cluster15707 | Acidobact      | Acidobacteria_Gp3   | Gp3                    | 0        | 0 | 0 | 0 | 0 | 0 | 1 | 0 | 0 | 0 | 0 | 0 | 1 |
| Cluster15708 | ;size=6        |                     |                        | 0        | 0 | 0 | 0 | 0 | 0 | 1 | 0 | 0 | 0 | 0 | 0 | 1 |
| Cluster15709 | Acidobact      | Acidobacteria_Gp1   |                        | 0        | 0 | 0 | 0 | 0 | 0 | 0 | 0 | 0 | 1 | 0 | 0 | 1 |
| Cluster15711 | Proteobac      | Betaproteobacteria  |                        | 0        | 0 | 0 | 1 | 0 | 0 | 0 | 0 | 0 | 0 | 0 | 0 | 1 |
| Cluster15713 | Acidobact      | Acidobacteria_Gp1   | Granulicella           | 0        | 0 | 0 | 0 | 0 | 0 | 0 | 0 | 0 | 1 | 0 | 0 | 1 |
| Cluster15714 | Proteobac      | Alphap Rhod         | Acetob: Acidisphaera   | 0        | 1 | 0 | 0 | 0 | 0 | 0 | 0 | 0 | 0 | 0 | 0 | 1 |
| Cluster15715 | Bacteroid      | Sphing Sphir        | Chitinophagaceae       | 0        | 0 | 0 | 0 | 1 | 0 | 0 | 0 | 0 | 0 | 0 | 0 | 1 |
| Cluster15723 | ;size=1        |                     |                        | 0        | 1 | 0 | 0 | 0 | 0 | 0 | 0 | 0 | 0 | 0 | 0 | 1 |
| Cluster15726 | Proteobac      | Alphap Rhizobiales  |                        | 0        | 0 | 0 | 0 | 0 | 0 | 0 | 1 | 0 | 0 | 0 | 0 | 1 |
| Cluster15731 | Acidobact      | Acidobacteria_Gp1   | Gp1                    | 0        | 0 | 0 | 1 | 0 | 0 | 0 | 0 | 0 | 0 | 0 | 0 | 1 |
| Cluster15741 | ;size=1        |                     |                        | 0        | 0 | 0 | 0 | 0 | 0 | 0 | 0 | 0 | 0 | 0 | 1 | 1 |
| Cluster15743 | Bacteroid      | Sphing Sphir        | Chitinophagaceae       | 0        | 0 | 0 | 0 | 1 | 0 | 0 | 0 | 0 | 0 | 0 | 0 | 1 |
| Cluster15749 | Proteobac      | Betapr              | Burkl Burkholderiaceae | 0        | 0 | 0 | 0 | 0 | 0 | 0 | 1 | 0 | 0 | 0 | 0 | 1 |
| Cluster15758 | Proteobac      | Alphaproteobacteria |                        | 0        | 0 | 0 | 0 | 0 | 0 | 0 | 1 | 0 | 0 | 0 | 0 | 1 |
| Cluster15761 | Verrucom       | Opitutae            |                        | 0        | 0 | 0 | 0 | 0 | 0 | 0 | 0 | 0 | 0 | 0 | 1 | 1 |
| Cluster15764 | Bacteroid      | Sphing Sphir        | Chitinophagaceae       | 0        | 0 | 0 | 0 | 0 | 0 | 0 | 1 | 0 | 0 | 0 | 0 | 1 |
| Cluster15768 | Gemmatir       | Gemm Gem            | Gemma Gemmatimon       | 0        | 0 | 0 | 0 | 0 | 0 | 1 | 0 | 0 | 0 | 0 | 0 | 1 |
| Cluster15787 | Proteobac      | Deltap              | Myxococcales           | 0        | 0 | 0 | 0 | 0 | 0 | 0 | 0 | 1 | 0 | 0 | 0 | 1 |
| Cluster15790 | Proteobac      | Alphap Rhizobiales  |                        | 0        | 0 | 0 | 1 | 0 | 0 | 0 | 0 | 0 | 0 | 0 | 0 | 1 |
| Cluster15803 | Proteobacteria |                     |                        | 0        | 0 | 1 | 0 | 0 | 0 | 0 | 0 | 0 | 0 | 0 | 0 | 1 |
| Cluster15810 | Acidobact      | Acidobacteria_Gp2   | Gp2                    | 0        | 0 | 1 | 0 | 0 | 0 | 0 | 0 | 0 | 0 | 0 | 0 | 1 |
| Cluster15816 | Acidobact      | Acidobacteria_Gp3   | Gp3                    | 0        | 0 | 0 | 0 | 1 | 0 | 0 | 0 | 0 | 0 | 0 | 0 | 1 |
| Cluster15823 | ;size=1        |                     |                        | 0        | 0 | 0 | 0 | 0 | 0 | 0 | 1 | 0 | 0 | 0 | 0 | 1 |
| Cluster15837 | Acidobact      | Acidobacteria_Gp1   | Granulicella           | 0        | 1 | 0 | 0 | 0 | 0 | 0 | 0 | 0 | 0 | 0 | 0 | 1 |
| Cluster15851 | ;size=2        |                     |                        | 0        | 0 | 0 | 0 | 0 | 0 | 0 | 0 | 0 | 0 | 1 | 0 | 1 |

|                                                            |   |   |   |   |   |   |   |   |   |   |   |   |   |
|------------------------------------------------------------|---|---|---|---|---|---|---|---|---|---|---|---|---|
| Cluster15855 Chlamydia Chlamy Chlar Parachlamydiaceae      | 0 | 1 | 0 | 0 | 0 | 0 | 0 | 0 | 0 | 0 | 0 | 0 | 1 |
| Cluster15856 Proteobac Alphap Rhodospirillales             | 0 | 0 | 0 | 1 | 0 | 0 | 0 | 0 | 0 | 0 | 0 | 0 | 1 |
| Cluster15859 Proteobac Betaproteobacteria                  | 0 | 0 | 0 | 0 | 0 | 0 | 0 | 1 | 0 | 0 | 0 | 0 | 1 |
| Cluster15862 Proteobac Alphap Rhodospirillales             | 0 | 0 | 0 | 0 | 0 | 0 | 1 | 0 | 0 | 0 | 0 | 0 | 1 |
| Cluster15871 Verrucom Subdivision3 Subdivision3_ξ          | 0 | 0 | 0 | 0 | 0 | 0 | 0 | 1 | 0 | 0 | 0 | 0 | 1 |
| Cluster15892;size=2                                        | 0 | 0 | 0 | 0 | 0 | 0 | 0 | 0 | 0 | 0 | 1 | 0 | 1 |
| Cluster15900 Armatimonadetes Armatimonade                  | 0 | 0 | 0 | 0 | 0 | 0 | 0 | 0 | 1 | 0 | 0 | 0 | 1 |
| Cluster15907 Proteobac Alphap Sphir Sphingomonadaceae      | 0 | 0 | 0 | 0 | 0 | 0 | 0 | 1 | 0 | 0 | 0 | 0 | 1 |
| Cluster15908 Acidobact Acidobacteria_Gp2 Gp2               | 0 | 0 | 0 | 0 | 0 | 0 | 0 | 0 | 0 | 0 | 0 | 1 | 1 |
| Cluster15910 Proteobac Deltaproteobacteria                 | 0 | 0 | 0 | 0 | 0 | 0 | 1 | 0 | 0 | 0 | 0 | 0 | 1 |
| Cluster15927;size=1                                        | 0 | 0 | 0 | 0 | 0 | 0 | 1 | 0 | 0 | 0 | 0 | 0 | 1 |
| Cluster15928;size=9                                        | 0 | 0 | 0 | 1 | 0 | 0 | 0 | 0 | 0 | 0 | 0 | 0 | 1 |
| Cluster15934;size=3                                        | 0 | 1 | 0 | 0 | 0 | 0 | 0 | 0 | 0 | 0 | 0 | 0 | 1 |
| Cluster15939 Acidobact Acidobacteria_Gp1 Gp1               | 0 | 0 | 0 | 0 | 0 | 0 | 0 | 1 | 0 | 0 | 0 | 0 | 1 |
| Cluster15943 Proteobac Alphap Rhizc Bradyrh Bradyrhizobiur | 0 | 1 | 0 | 0 | 0 | 0 | 0 | 0 | 0 | 0 | 0 | 0 | 1 |
| Cluster15945 Proteobac Alphap Caulc Caulobacteraceae       | 0 | 0 | 0 | 0 | 0 | 0 | 1 | 0 | 0 | 0 | 0 | 0 | 1 |
| Cluster15953 Acidobact Acidobacteria_Gp1 Edaphobacter      | 0 | 0 | 0 | 0 | 0 | 0 | 0 | 0 | 0 | 1 | 0 | 0 | 1 |
| Cluster15960 Actinobac Actinol Actin Nocardia Rhodococcus  | 0 | 0 | 0 | 0 | 0 | 0 | 0 | 0 | 0 | 0 | 0 | 1 | 1 |
| Cluster15967 Acidobact Acidobacteria_Gp1 Edaphobacter      | 0 | 0 | 0 | 0 | 0 | 0 | 0 | 0 | 0 | 0 | 1 | 0 | 1 |
| Cluster15972;size=1                                        | 0 | 0 | 0 | 0 | 0 | 0 | 1 | 0 | 0 | 0 | 0 | 0 | 1 |
| Cluster15976 Proteobac Alphap Alphaproteok Rhizomicrobiu   | 0 | 0 | 0 | 0 | 1 | 0 | 0 | 0 | 0 | 0 | 0 | 0 | 1 |
| Cluster15996 Acidobact Acidobacteria_Gp1                   | 0 | 0 | 1 | 0 | 0 | 0 | 0 | 0 | 0 | 0 | 0 | 0 | 1 |
| Cluster16000 Acidobact Acidobacteria_Gp2 Gp2               | 0 | 0 | 0 | 0 | 0 | 0 | 0 | 0 | 1 | 0 | 0 | 0 | 1 |
| Cluster16003 Acidobact Acidobacteria_Gp1 Edaphobacter      | 0 | 0 | 0 | 0 | 0 | 0 | 0 | 1 | 0 | 0 | 0 | 0 | 1 |
| Cluster16006;size=1                                        | 0 | 0 | 0 | 0 | 0 | 0 | 0 | 0 | 0 | 0 | 0 | 1 | 1 |
| Cluster16013 Acidobact Acidobacteria_Gp2 Gp2               | 0 | 0 | 0 | 1 | 0 | 0 | 0 | 0 | 0 | 0 | 0 | 0 | 1 |
| Cluster16017;size=3                                        | 0 | 0 | 0 | 1 | 0 | 0 | 0 | 0 | 0 | 0 | 0 | 0 | 1 |
| Cluster16018 Acidobact Acidobacteria_Gp3                   | 0 | 0 | 0 | 0 | 0 | 0 | 0 | 1 | 0 | 0 | 0 | 0 | 1 |
| Cluster16020 Proteobac Gammaproteobacteria                 | 0 | 0 | 0 | 0 | 0 | 0 | 1 | 0 | 0 | 0 | 0 | 0 | 1 |





|              |           |                     |                             |   |   |   |   |   |   |   |   |   |   |   |   |
|--------------|-----------|---------------------|-----------------------------|---|---|---|---|---|---|---|---|---|---|---|---|
| Cluster16301 | Acidobact | Acidobacteria_Gp2   | Gp2                         | 0 | 0 | 0 | 1 | 0 | 0 | 0 | 0 | 0 | 0 | 0 | 1 |
| Cluster16305 | Acidobact | Acidobacteria_Gp2   | Gp2                         | 0 | 0 | 0 | 0 | 0 | 0 | 0 | 0 | 1 | 0 | 0 | 1 |
| Cluster16307 | Proteobac | Alphap              | Rhod Rhodospirillaceae      | 0 | 0 | 0 | 1 | 0 | 0 | 0 | 0 | 0 | 0 | 0 | 1 |
| Cluster16309 | Bacteroid | Sphing Sphir        | Chitinophagaceae            | 0 | 0 | 1 | 0 | 0 | 0 | 0 | 0 | 0 | 0 | 0 | 1 |
| Cluster16310 | Proteobac | Betaproteobacteria  |                             | 0 | 0 | 0 | 1 | 0 | 0 | 0 | 0 | 0 | 0 | 0 | 1 |
| Cluster16326 | ;size=3   |                     |                             | 0 | 0 | 0 | 1 | 0 | 0 | 0 | 0 | 0 | 0 | 0 | 1 |
| Cluster16327 | ;size=3   |                     |                             | 0 | 0 | 0 | 0 | 0 | 0 | 0 | 0 | 0 | 1 | 0 | 1 |
| Cluster16332 | ;size=6   |                     |                             | 0 | 0 | 1 | 0 | 0 | 0 | 0 | 0 | 0 | 0 | 0 | 1 |
| Cluster16353 | Acidobact | Acidobacteria_Gp2   | Gp2                         | 0 | 0 | 0 | 1 | 0 | 0 | 0 | 0 | 0 | 0 | 0 | 1 |
| Cluster16354 | Proteobac | Deltaproteobacteria |                             | 0 | 0 | 0 | 0 | 0 | 0 | 0 | 0 | 0 | 1 | 0 | 1 |
| Cluster16368 | Acidobact | Acidobacteria_Gp3   | Gp3                         | 0 | 0 | 0 | 0 | 1 | 0 | 0 | 0 | 0 | 0 | 0 | 1 |
| Cluster16370 | Proteobac | Alphap              | Rhizobiales                 | 0 | 0 | 0 | 1 | 0 | 0 | 0 | 0 | 0 | 0 | 0 | 1 |
| Cluster16372 | Actinobac | Actinol             | Solirt Conexib Conexibacter | 0 | 0 | 0 | 0 | 0 | 0 | 0 | 0 | 0 | 1 | 0 | 1 |
| Cluster16376 | Acidobact | Acidobacteria_Gp1   | Gp1                         | 0 | 0 | 0 | 0 | 0 | 0 | 0 | 0 | 0 | 1 | 0 | 1 |
| Cluster16379 | Actinobac | Actinol             | Actinomycetales             | 0 | 0 | 1 | 0 | 0 | 0 | 0 | 0 | 0 | 0 | 0 | 1 |
| Cluster16387 | Proteobac | Betaproteobacteria  |                             | 0 | 0 | 0 | 0 | 1 | 0 | 0 | 0 | 0 | 0 | 0 | 1 |
| Cluster16389 | Proteobac | Alphaproteobacteria |                             | 0 | 0 | 1 | 0 | 0 | 0 | 0 | 0 | 0 | 0 | 0 | 1 |
| Cluster16394 | Acidobact | Acidobacteria_Gp2   | Gp2                         | 0 | 0 | 0 | 1 | 0 | 0 | 0 | 0 | 0 | 0 | 0 | 1 |
| Cluster16400 | ;size=2   |                     |                             | 0 | 0 | 1 | 0 | 0 | 0 | 0 | 0 | 0 | 0 | 0 | 1 |
| Cluster16404 | Proteobac | Alphap              | Caulc Caulobæ Phenylobacter | 0 | 0 | 1 | 0 | 0 | 0 | 0 | 0 | 0 | 0 | 0 | 1 |
| Cluster16413 | Verrucom  | Opiritae            |                             | 0 | 0 | 0 | 1 | 0 | 0 | 0 | 0 | 0 | 0 | 0 | 1 |
| Cluster16414 | Actinobac | Actinol             | Acidimicrobiales            | 0 | 0 | 1 | 0 | 0 | 0 | 0 | 0 | 0 | 0 | 0 | 1 |
| Cluster16422 | Actinobac | Actinol             | Solirt Conexib Conexibacter | 0 | 0 | 0 | 0 | 0 | 0 | 0 | 0 | 0 | 1 | 0 | 1 |
| Cluster16424 | ;size=2   |                     |                             | 0 | 0 | 0 | 0 | 0 | 0 | 0 | 0 | 0 | 1 | 0 | 1 |
| Cluster16430 | Actinobac | Actinol             | Solirubrobacterales         | 0 | 0 | 0 | 0 | 0 | 0 | 0 | 0 | 0 | 1 | 0 | 1 |
| Cluster16432 | Bacteroid | Sphing Sphir        | Chitinophagaceae            | 0 | 0 | 0 | 1 | 0 | 0 | 0 | 0 | 0 | 0 | 0 | 1 |
| Cluster16434 | Acidobact | Acidobacteria_Gp2   | Gp2                         | 0 | 0 | 0 | 0 | 1 | 0 | 0 | 0 | 0 | 0 | 0 | 1 |
| Cluster16438 | Acidobact | Acidobacteria_Gp1   |                             | 0 | 0 | 0 | 1 | 0 | 0 | 0 | 0 | 0 | 0 | 0 | 1 |
| Cluster16439 | Verrucom  | Subdivision3        | Subdivision3_ξ              | 0 | 0 | 0 | 0 | 0 | 0 | 0 | 0 | 1 | 0 | 0 | 1 |



|                                                           |   |   |   |   |   |   |   |   |   |   |   |   |   |
|-----------------------------------------------------------|---|---|---|---|---|---|---|---|---|---|---|---|---|
| Cluster16584 Verrucom Opitut: Opitu Opituta Opitutus      | 0 | 0 | 0 | 0 | 0 | 0 | 0 | 0 | 1 | 0 | 0 | 0 | 1 |
| Cluster16590 Acidobact Acidobacteria_Gp6 Gp6              | 0 | 0 | 0 | 0 | 1 | 0 | 0 | 0 | 0 | 0 | 0 | 0 | 1 |
| Cluster16595 Acidobact Acidobacteria_Gp3                  | 0 | 0 | 0 | 1 | 0 | 0 | 0 | 0 | 0 | 0 | 0 | 0 | 1 |
| Cluster16596;size=1                                       | 0 | 0 | 0 | 0 | 1 | 0 | 0 | 0 | 0 | 0 | 0 | 0 | 1 |
| Cluster16601 Acidobact Acidobacteria_Gp3 Bryobacter       | 0 | 0 | 0 | 0 | 0 | 0 | 0 | 0 | 0 | 0 | 1 | 0 | 1 |
| Cluster16603 Acidobact Acidobacteria_Gp1 Gp1              | 0 | 0 | 0 | 0 | 0 | 0 | 0 | 0 | 0 | 1 | 0 | 0 | 1 |
| Cluster16610;size=1                                       | 0 | 0 | 0 | 0 | 1 | 0 | 0 | 0 | 0 | 0 | 0 | 0 | 1 |
| Cluster16614 Acidobact Acidobacteria_Gp1 Edaphobacter     | 0 | 0 | 0 | 1 | 0 | 0 | 0 | 0 | 0 | 0 | 0 | 0 | 1 |
| Cluster16627 Acidobact Acidobacteria_Gp1                  | 0 | 0 | 0 | 0 | 0 | 1 | 0 | 0 | 0 | 0 | 0 | 0 | 1 |
| Cluster16628 Proteobac Alphap Rhod Acetob: Acidisphaera   | 0 | 0 | 0 | 0 | 0 | 0 | 0 | 0 | 0 | 0 | 1 | 0 | 1 |
| Cluster16637 Proteobac Alphap Rhizc Methylocystaceae      | 0 | 0 | 0 | 1 | 0 | 0 | 0 | 0 | 0 | 0 | 0 | 0 | 1 |
| Cluster16642 Actinobac Actinol Actinomycetales            | 0 | 0 | 0 | 0 | 0 | 0 | 0 | 0 | 0 | 0 | 0 | 1 | 1 |
| Cluster16647 Acidobact Acidobacteria_Gp1                  | 0 | 0 | 0 | 1 | 0 | 0 | 0 | 0 | 0 | 0 | 0 | 0 | 1 |
| Cluster16650 Proteobac Gammaproteobacteria                | 0 | 0 | 0 | 0 | 0 | 0 | 0 | 0 | 0 | 1 | 0 | 0 | 1 |
| Cluster16652 Bacteroid Sphing Sphir Chitinophagaceae      | 0 | 0 | 0 | 0 | 0 | 0 | 0 | 0 | 0 | 0 | 1 | 0 | 1 |
| Cluster16654 Actinobac Actinol Actin Mycoba Mycobacteriur | 0 | 0 | 0 | 1 | 0 | 0 | 0 | 0 | 0 | 0 | 0 | 0 | 1 |
| Cluster16660 Proteobac Alphap Rhizobiales                 | 0 | 0 | 1 | 0 | 0 | 0 | 0 | 0 | 0 | 0 | 0 | 0 | 1 |
| Cluster16661 Acidobact Acidobacteria_Gp1 Gp1              | 0 | 0 | 0 | 1 | 0 | 0 | 0 | 0 | 0 | 0 | 0 | 0 | 1 |
| Cluster16666 Verrucom Subdivision3 Subdivision3_ξ         | 0 | 0 | 0 | 0 | 1 | 0 | 0 | 0 | 0 | 0 | 0 | 0 | 1 |
| Cluster16669 Acidobact Acidobacteria_Gp1 Gp1              | 0 | 0 | 0 | 0 | 0 | 1 | 0 | 0 | 0 | 0 | 0 | 0 | 1 |
| Cluster16672 Proteobac Deltap Myxc Polyangiaceae          | 0 | 0 | 0 | 0 | 1 | 0 | 0 | 0 | 0 | 0 | 0 | 0 | 1 |
| Cluster16678;size=2                                       | 0 | 0 | 0 | 0 | 1 | 0 | 0 | 0 | 0 | 0 | 0 | 0 | 1 |
| Cluster16686 Proteobac Alphap Rhodospirillales            | 0 | 0 | 0 | 0 | 1 | 0 | 0 | 0 | 0 | 0 | 0 | 0 | 1 |
| Cluster16687 Proteobac Alphap Rhizobiales                 | 0 | 0 | 1 | 0 | 0 | 0 | 0 | 0 | 0 | 0 | 0 | 0 | 1 |
| Cluster16688 Proteobac Betapr Burkl Oxalobacteraceae      | 0 | 0 | 1 | 0 | 0 | 0 | 0 | 0 | 0 | 0 | 0 | 0 | 1 |
| Cluster16692 Actinobac Actinol Actin Pseudonocardiaaceae  | 0 | 0 | 0 | 0 | 0 | 0 | 0 | 0 | 0 | 0 | 1 | 0 | 1 |
| Cluster16696 Proteobac Alphap Rhizc Rhizobi: Vasilyevaea  | 0 | 0 | 1 | 0 | 0 | 0 | 0 | 0 | 0 | 0 | 0 | 0 | 1 |
| Cluster16698 Verrucom Opitut: Opitu Opituta Opitutus      | 0 | 0 | 0 | 0 | 0 | 0 | 0 | 0 | 0 | 1 | 0 | 0 | 1 |
| Cluster16703 Acidobact Acidobacteria_Gp1                  | 0 | 0 | 0 | 0 | 0 | 0 | 0 | 0 | 0 | 0 | 1 | 0 | 1 |

|                                                            |   |   |   |   |   |   |   |   |   |   |   |   |   |
|------------------------------------------------------------|---|---|---|---|---|---|---|---|---|---|---|---|---|
| Cluster16707 Proteobac Deltap Myxc Polyangiaceae           | 0 | 0 | 0 | 0 | 1 | 0 | 0 | 0 | 0 | 0 | 0 | 0 | 1 |
| Cluster16713;size=2                                        | 0 | 0 | 0 | 0 | 1 | 0 | 0 | 0 | 0 | 0 | 0 | 0 | 1 |
| Cluster16715 Proteobac Deltap Myxc Polyangiaceae           | 0 | 0 | 0 | 0 | 0 | 0 | 0 | 0 | 0 | 0 | 1 | 0 | 1 |
| Cluster16720;size=1                                        | 0 | 0 | 0 | 0 | 0 | 0 | 0 | 0 | 0 | 1 | 0 | 0 | 1 |
| Cluster16727;size=1                                        | 0 | 0 | 0 | 0 | 1 | 0 | 0 | 0 | 0 | 0 | 0 | 0 | 1 |
| Cluster16733 Verrucom Spartobacteria Spartobacteria        | 0 | 0 | 0 | 0 | 1 | 0 | 0 | 0 | 0 | 0 | 0 | 0 | 1 |
| Cluster16734 Proteobac Alphap Rhizc Xantho Pseudolabrys    | 0 | 0 | 0 | 1 | 0 | 0 | 0 | 0 | 0 | 0 | 0 | 0 | 1 |
| Cluster16744 Proteobac Alphap Alphaproteok Rhizomicrobiu   | 0 | 0 | 0 | 1 | 0 | 0 | 0 | 0 | 0 | 0 | 0 | 0 | 1 |
| Cluster16749 Acidobact Acidobacteria_Gp2 Gp2               | 0 | 0 | 0 | 1 | 0 | 0 | 0 | 0 | 0 | 0 | 0 | 0 | 1 |
| Cluster16751 Proteobac Alphap Alphaproteok Rhizomicrobiu   | 0 | 0 | 0 | 0 | 0 | 0 | 0 | 0 | 0 | 1 | 0 | 0 | 1 |
| Cluster16757 Chlamydi: Chlamy Chlar Parachl: Parachlamydia | 0 | 1 | 0 | 0 | 0 | 0 | 0 | 0 | 0 | 0 | 0 | 0 | 1 |
| Cluster16758 Proteobac Deltap Myxococcales                 | 0 | 0 | 0 | 0 | 1 | 0 | 0 | 0 | 0 | 0 | 0 | 0 | 1 |
| Cluster16762 Acidobact Acidobacteria_Gp1                   | 0 | 0 | 0 | 1 | 0 | 0 | 0 | 0 | 0 | 0 | 0 | 0 | 1 |
| Cluster16767 Acidobact Acidobacteria_Gp2 Gp2               | 0 | 0 | 0 | 0 | 1 | 0 | 0 | 0 | 0 | 0 | 0 | 0 | 1 |
| Cluster16769 Proteobac Gamm Xantl Sinobac Steroidobacter   | 0 | 0 | 1 | 0 | 0 | 0 | 0 | 0 | 0 | 0 | 0 | 0 | 1 |
| Cluster16770 Proteobac Alphap Alphaproteok Rhizomicrobiu   | 0 | 0 | 1 | 0 | 0 | 0 | 0 | 0 | 0 | 0 | 0 | 0 | 1 |
| Cluster16772 Proteobacteria                                | 0 | 0 | 1 | 0 | 0 | 0 | 0 | 0 | 0 | 0 | 0 | 0 | 1 |
| Cluster16773 Proteobac Betapr Burkl Oxalobacteraceae       | 0 | 0 | 0 | 1 | 0 | 0 | 0 | 0 | 0 | 0 | 0 | 0 | 1 |
| Cluster16775 Verrucom Subdivision3 Subdivision3_ξ          | 0 | 0 | 0 | 0 | 0 | 0 | 0 | 0 | 0 | 0 | 1 | 0 | 1 |
| Cluster16781;size=2                                        | 0 | 0 | 0 | 0 | 1 | 0 | 0 | 0 | 0 | 0 | 0 | 0 | 1 |
| Cluster16788 Acidobact Acidobacteria_Gp1                   | 0 | 0 | 0 | 0 | 0 | 0 | 0 | 0 | 0 | 0 | 1 | 0 | 1 |
| Cluster16789;size=1                                        | 0 | 0 | 0 | 1 | 0 | 0 | 0 | 0 | 0 | 0 | 0 | 0 | 1 |
| Cluster16793 Proteobac Betaproteobacteria                  | 0 | 0 | 0 | 0 | 0 | 0 | 0 | 1 | 0 | 0 | 0 | 0 | 1 |
| Cluster16797 Acidobact Acidobacteria_Gp13 Gp13             | 0 | 0 | 0 | 0 | 0 | 0 | 0 | 0 | 0 | 0 | 1 | 0 | 1 |
| Cluster16809 Proteobac Deltap Myxococcales                 | 0 | 0 | 1 | 0 | 0 | 0 | 0 | 0 | 0 | 0 | 0 | 0 | 1 |
| Cluster16810 Acidobact Acidobacteria_Gp1 Gp1               | 0 | 0 | 0 | 1 | 0 | 0 | 0 | 0 | 0 | 0 | 0 | 0 | 1 |
| Cluster16814 Proteobac Gamm Xanthomonadales                | 0 | 0 | 0 | 0 | 0 | 0 | 0 | 0 | 0 | 1 | 0 | 0 | 1 |
| Cluster16821 Acidobact Acidobacteria_Gp1 Granulicella      | 0 | 0 | 0 | 0 | 1 | 0 | 0 | 0 | 0 | 0 | 0 | 0 | 1 |
| Cluster16827 Proteobac Alphap Alphaproteok Rhizomicrobiu   | 0 | 0 | 0 | 0 | 0 | 0 | 0 | 0 | 0 | 0 | 1 | 0 | 1 |



|              |               |                                   |   |   |   |   |   |   |   |   |   |   |   |   |
|--------------|---------------|-----------------------------------|---|---|---|---|---|---|---|---|---|---|---|---|
| Cluster16831 | Acidobact     | Acidobacteria_Gp1                 | 0 | 0 | 0 | 0 | 0 | 0 | 0 | 0 | 0 | 1 | 0 | 1 |
| Cluster16832 | Gemmatir      | Gemm Gemm Gemma Gemmatimonas      | 0 | 0 | 0 | 0 | 0 | 0 | 0 | 0 | 0 | 1 | 0 | 1 |
| Cluster16835 | Acidobact     | Acidobacteria_Gp10 Gp10           | 0 | 0 | 0 | 1 | 0 | 0 | 0 | 0 | 0 | 0 | 0 | 1 |
| Cluster16838 | Acidobact     | Acidobacteria_Gp1 Edaphobacter    | 0 | 0 | 0 | 1 | 0 | 0 | 0 | 0 | 0 | 0 | 0 | 1 |
| Cluster16855 | Proteobac     | Betapr Rhod Rhodocyclaceae        | 0 | 0 | 1 | 0 | 0 | 0 | 0 | 0 | 0 | 0 | 0 | 1 |
| Cluster16859 | Proteobac     | Gammaproteobacteria               | 0 | 0 | 1 | 0 | 0 | 0 | 0 | 0 | 0 | 0 | 0 | 1 |
| Cluster16866 | Proteobac     | Alphap Rhod Acetobac Acidisphaera | 0 | 0 | 0 | 0 | 0 | 0 | 0 | 1 | 0 | 0 | 0 | 1 |
| Cluster16874 | Acidobact     | Acidobacteria_Gp1 Gp1             | 0 | 0 | 0 | 0 | 0 | 1 | 0 | 0 | 0 | 0 | 0 | 1 |
| Cluster16876 | Acidobact     | Acidobacteria_Gp3 Gp3             | 0 | 0 | 0 | 0 | 0 | 0 | 0 | 0 | 1 | 0 | 0 | 1 |
| Cluster16878 | Proteobac     | Alphaproteobacteria               | 0 | 0 | 0 | 0 | 1 | 0 | 0 | 0 | 0 | 0 | 0 | 1 |
| Cluster16880 | Proteobac     | Gammaproteobacteria               | 0 | 0 | 0 | 0 | 0 | 0 | 0 | 1 | 0 | 0 | 0 | 1 |
| Cluster16881 | ;size=1       |                                   | 0 | 0 | 0 | 0 | 1 | 0 | 0 | 0 | 0 | 0 | 0 | 1 |
| Cluster16884 | Acidobact     | Acidobacteria_Gp2 Gp2             | 0 | 0 | 0 | 0 | 1 | 0 | 0 | 0 | 0 | 0 | 0 | 1 |
| Cluster16889 | Acidobact     | Acidobacteria_Gp1 Gp1             | 0 | 0 | 0 | 1 | 0 | 0 | 0 | 0 | 0 | 0 | 0 | 1 |
| Cluster16895 | Proteobac     | Gamm Xantl Sinobac Steroidobacter | 0 | 0 | 0 | 0 | 0 | 0 | 0 | 0 | 0 | 1 | 0 | 1 |
| Cluster16897 | Acidobact     | Acidobacteria_Gp1 Gp1             | 0 | 0 | 0 | 0 | 0 | 0 | 0 | 0 | 0 | 1 | 0 | 1 |
| Cluster16902 | Acidobacteria |                                   | 0 | 0 | 0 | 0 | 0 | 0 | 0 | 0 | 0 | 1 | 0 | 1 |
| Cluster16917 | Proteobac     | Gammaproteobacteria               | 1 | 0 | 0 | 0 | 0 | 0 | 0 | 0 | 0 | 0 | 0 | 1 |
| Cluster16918 | Proteobac     | Deltaproteobacteria               | 0 | 0 | 0 | 0 | 0 | 0 | 0 | 1 | 0 | 0 | 0 | 1 |
| Cluster16923 | Acidobact     | Acidobacteria_Gp1                 | 0 | 1 | 0 | 0 | 0 | 0 | 0 | 0 | 0 | 0 | 0 | 1 |
| Cluster16926 | Chloroflex    | Ktedor Ktedonobacterales          | 0 | 0 | 0 | 0 | 0 | 1 | 0 | 0 | 0 | 0 | 0 | 1 |
| Cluster16927 | Proteobac     | Betapr Burkl Burkhol Burkholderia | 0 | 0 | 0 | 0 | 1 | 0 | 0 | 0 | 0 | 0 | 0 | 1 |
| Cluster16928 | Acidobact     | Acidobacteria_Gp1 Gp1             | 0 | 0 | 1 | 0 | 0 | 0 | 0 | 0 | 0 | 0 | 0 | 1 |
| Cluster16942 | Proteobac     | Alphap Alphaproteob Rhizomicrobiu | 0 | 0 | 0 | 0 | 0 | 0 | 0 | 0 | 0 | 1 | 0 | 1 |
| Cluster16951 | Bacteroid     | Sphing Sphir Chitino Flavitalea   | 0 | 0 | 0 | 1 | 0 | 0 | 0 | 0 | 0 | 0 | 0 | 1 |
| Cluster16958 | Proteobac     | Alphap Rhodospirillales           | 0 | 0 | 0 | 0 | 0 | 0 | 0 | 0 | 0 | 1 | 0 | 1 |
| Cluster16959 | Acidobact     | Acidobacteria_Gp1                 | 0 | 0 | 0 | 0 | 0 | 0 | 0 | 0 | 0 | 1 | 0 | 1 |
| Cluster16967 | ;size=1       |                                   | 0 | 0 | 0 | 1 | 0 | 0 | 0 | 0 | 0 | 0 | 0 | 1 |
| Cluster16969 | Acidobact     | Acidobacteria_Gp2 Gp2             | 0 | 0 | 0 | 0 | 0 | 0 | 0 | 0 | 1 | 0 | 0 | 1 |











|                                                            |   |   |   |   |   |   |   |   |   |   |   |   |   |
|------------------------------------------------------------|---|---|---|---|---|---|---|---|---|---|---|---|---|
| Cluster17625 Verrucom Opitut: Opitu Opituta Opitutus       | 0 | 0 | 0 | 0 | 0 | 1 | 0 | 0 | 0 | 0 | 0 | 0 | 1 |
| Cluster17643 Actinobac Actinol Actinomycetales             | 0 | 0 | 0 | 1 | 0 | 0 | 0 | 0 | 0 | 0 | 0 | 0 | 1 |
| Cluster17660 Acidobact Acidobacteria_Gp10 Gp10             | 0 | 0 | 0 | 0 | 0 | 0 | 0 | 0 | 0 | 0 | 1 | 0 | 1 |
| Cluster17664;size=2                                        | 0 | 0 | 0 | 0 | 0 | 1 | 0 | 0 | 0 | 0 | 0 | 0 | 1 |
| Cluster17668 Acidobact Acidobacteria_Gp2 Gp2               | 0 | 0 | 0 | 1 | 0 | 0 | 0 | 0 | 0 | 0 | 0 | 0 | 1 |
| Cluster17672;size=1                                        | 0 | 0 | 0 | 0 | 0 | 1 | 0 | 0 | 0 | 0 | 0 | 0 | 1 |
| Cluster17679 Acidobact Acidobacteria_Gp1                   | 0 | 0 | 0 | 0 | 1 | 0 | 0 | 0 | 0 | 0 | 0 | 0 | 1 |
| Cluster17683 Acidobact Acidobacteria_Gp1                   | 0 | 0 | 0 | 0 | 0 | 1 | 0 | 0 | 0 | 0 | 0 | 0 | 1 |
| Cluster17685 Proteobac Deltap Myxc Polyangiaceae           | 0 | 0 | 1 | 0 | 0 | 0 | 0 | 0 | 0 | 0 | 0 | 0 | 1 |
| Cluster17693 Acidobact Acidobacteria_Gp1 Granulicella      | 0 | 0 | 0 | 1 | 0 | 0 | 0 | 0 | 0 | 0 | 0 | 0 | 1 |
| Cluster17699 Acidobact Acidobacteria_Gp2 Gp2               | 0 | 0 | 0 | 1 | 0 | 0 | 0 | 0 | 0 | 0 | 0 | 0 | 1 |
| Cluster17702 Proteobacteria                                | 0 | 0 | 0 | 0 | 0 | 1 | 0 | 0 | 0 | 0 | 0 | 0 | 1 |
| Cluster17705 Acidobact Acidobacteria_Gp1                   | 0 | 0 | 1 | 0 | 0 | 0 | 0 | 0 | 0 | 0 | 0 | 0 | 1 |
| Cluster17709 Verrucom Opitut: Opitu Opituta Opitutus       | 0 | 0 | 0 | 1 | 0 | 0 | 0 | 0 | 0 | 0 | 0 | 0 | 1 |
| Cluster17714 Armatimonadetes Armatimonade                  | 0 | 0 | 0 | 1 | 0 | 0 | 0 | 0 | 0 | 0 | 0 | 0 | 1 |
| Cluster17715 Acidobact Acidobacteria_Gp1                   | 0 | 0 | 0 | 0 | 0 | 1 | 0 | 0 | 0 | 0 | 0 | 0 | 1 |
| Cluster17717 Acidobact Acidobacteria_Gp2 Gp2               | 0 | 1 | 0 | 0 | 0 | 0 | 0 | 0 | 0 | 0 | 0 | 0 | 1 |
| Cluster17718 Proteobac Gammaproteobacteria                 | 0 | 0 | 0 | 0 | 0 | 0 | 0 | 0 | 0 | 0 | 1 | 0 | 1 |
| Cluster17719 Acidobact Acidobacteria_Gp2 Gp2               | 0 | 0 | 0 | 0 | 1 | 0 | 0 | 0 | 0 | 0 | 0 | 0 | 1 |
| Cluster17725 Acidobact Acidobacteria_Gp1                   | 0 | 0 | 0 | 0 | 0 | 0 | 0 | 1 | 0 | 0 | 0 | 0 | 1 |
| Cluster17747 Acidobact Acidobacteria_Gp2 Gp2               | 0 | 0 | 0 | 0 | 1 | 0 | 0 | 0 | 0 | 0 | 0 | 0 | 1 |
| Cluster17754 Actinobac Actinol Soliru Conexib Conexibacter | 0 | 0 | 0 | 0 | 0 | 0 | 0 | 0 | 0 | 0 | 0 | 1 | 1 |
| Cluster17755 Acidobact Acidobacteria_Gp2 Gp2               | 0 | 0 | 0 | 0 | 0 | 0 | 0 | 1 | 0 | 0 | 0 | 0 | 1 |
| Cluster17757 Chloroflex Ktedor Ktedo Thermo Thermosporot   | 0 | 0 | 0 | 0 | 0 | 0 | 0 | 0 | 0 | 0 | 0 | 1 | 1 |
| Cluster17761;size=1                                        | 0 | 0 | 0 | 0 | 0 | 0 | 0 | 0 | 0 | 0 | 1 | 0 | 1 |
| Cluster17786 Acidobact Acidobacteria_Gp2 Gp2               | 0 | 0 | 0 | 0 | 0 | 0 | 0 | 1 | 0 | 0 | 0 | 0 | 1 |
| Cluster17795 Acidobact Acidobacteria_Gp2 Gp2               | 0 | 0 | 0 | 0 | 0 | 1 | 0 | 0 | 0 | 0 | 0 | 0 | 1 |
| Cluster17796 Proteobac Deltaproteobacteria                 | 0 | 0 | 0 | 0 | 0 | 0 | 0 | 0 | 0 | 0 | 0 | 1 | 1 |
| Cluster17797 Actinobac Actinol Actin Nocardia Nocardia     | 0 | 0 | 0 | 0 | 0 | 0 | 0 | 1 | 0 | 0 | 0 | 0 | 1 |

|                                                               |   |   |   |   |   |   |   |   |   |   |   |   |   |
|---------------------------------------------------------------|---|---|---|---|---|---|---|---|---|---|---|---|---|
| Cluster17801 Actinobac Actinol Actinomycetales                | 0 | 0 | 0 | 0 | 0 | 0 | 0 | 1 | 0 | 0 | 0 | 0 | 1 |
| Cluster17805 Proteobac Alphap Caulc Caulobacteraceae          | 0 | 0 | 0 | 0 | 0 | 0 | 0 | 1 | 0 | 0 | 0 | 0 | 1 |
| Cluster17811 Acidobact Acidobacteria_Gp2 Gp2                  | 0 | 0 | 0 | 0 | 0 | 0 | 0 | 0 | 0 | 0 | 0 | 1 | 1 |
| Cluster17814 Acidobacteria                                    | 0 | 0 | 0 | 0 | 0 | 0 | 0 | 1 | 0 | 0 | 0 | 0 | 1 |
| Cluster17829 Proteobac Alphap Rhod Acetobacteraceae           | 0 | 0 | 0 | 0 | 0 | 0 | 0 | 1 | 0 | 0 | 0 | 0 | 1 |
| Cluster17831 Acidobact Acidobacteria_Gp1                      | 0 | 0 | 0 | 0 | 0 | 0 | 0 | 0 | 0 | 0 | 1 | 0 | 1 |
| Cluster17832 Proteobac Betapr Burkl Burkhol Burkholderia      | 0 | 0 | 0 | 0 | 0 | 0 | 0 | 1 | 0 | 0 | 0 | 0 | 1 |
| Cluster17833 Acidobact Acidobacteria_Gp2 Gp2                  | 0 | 0 | 0 | 0 | 0 | 0 | 0 | 1 | 0 | 0 | 0 | 0 | 1 |
| Cluster17835 Proteobacteria                                   | 0 | 0 | 0 | 0 | 0 | 0 | 0 | 0 | 0 | 0 | 1 | 0 | 1 |
| Cluster17840 Proteobac Gammaproteobacteria                    | 0 | 0 | 0 | 0 | 0 | 0 | 0 | 0 | 0 | 0 | 1 | 0 | 1 |
| Cluster17841 Acidobact Acidobacteria_Gp1                      | 0 | 0 | 0 | 0 | 0 | 0 | 1 | 0 | 0 | 0 | 0 | 0 | 1 |
| Cluster17842 Proteobac Gammaproteobacteria                    | 0 | 0 | 0 | 0 | 0 | 0 | 0 | 1 | 0 | 0 | 0 | 0 | 1 |
| Cluster17847;size=1                                           | 0 | 0 | 0 | 0 | 0 | 0 | 0 | 1 | 0 | 0 | 0 | 0 | 1 |
| Cluster17850 Proteobac Alphap Rhizc Beijerinckiaceae          | 0 | 0 | 0 | 0 | 0 | 0 | 0 | 0 | 0 | 0 | 0 | 1 | 1 |
| Cluster17852 Proteobac Alphap Rhizobiales                     | 0 | 0 | 0 | 0 | 0 | 0 | 0 | 0 | 1 | 0 | 0 | 0 | 1 |
| Cluster17868 Acidobact Acidobacteria_Gp3 Gp3                  | 0 | 1 | 0 | 0 | 0 | 0 | 0 | 0 | 0 | 0 | 0 | 0 | 1 |
| Cluster17873 Acidobact Acidobacteria_Gp2 Gp2                  | 0 | 0 | 0 | 1 | 0 | 0 | 0 | 0 | 0 | 0 | 0 | 0 | 1 |
| Cluster17874 Acidobact Acidobacteria_Gp2 Gp2                  | 0 | 0 | 0 | 0 | 0 | 0 | 0 | 0 | 0 | 0 | 1 | 0 | 1 |
| Cluster17876 Proteobac Alphap Rhizc Xantho Pseudolabrys       | 0 | 0 | 0 | 0 | 0 | 0 | 0 | 0 | 0 | 0 | 1 | 0 | 1 |
| Cluster17877 Proteobac Alphap Rhizobiales                     | 0 | 0 | 0 | 0 | 0 | 0 | 0 | 0 | 0 | 0 | 0 | 1 | 1 |
| Cluster17883 Acidobact Acidobacteria_Gp3 Gp3                  | 0 | 0 | 0 | 0 | 0 | 0 | 0 | 1 | 0 | 0 | 0 | 0 | 1 |
| Cluster17886 Proteobac Gamm Legio Legione Legionella          | 0 | 0 | 0 | 0 | 0 | 1 | 0 | 0 | 0 | 0 | 0 | 0 | 1 |
| Cluster17892 Proteobac Alphap Alphaproteo Rhizomicrobiu       | 0 | 0 | 0 | 0 | 0 | 0 | 0 | 0 | 0 | 0 | 1 | 0 | 1 |
| Cluster17893 Acidobact Acidobacteria_Gp1                      | 0 | 0 | 0 | 0 | 1 | 0 | 0 | 0 | 0 | 0 | 0 | 0 | 1 |
| Cluster17901 Proteobac Alphap Rhod Rhodos Dongia              | 0 | 0 | 0 | 0 | 0 | 0 | 0 | 0 | 0 | 0 | 1 | 0 | 1 |
| Cluster17903 Acidobact Acidobacteria_Gp1                      | 0 | 0 | 0 | 0 | 0 | 0 | 1 | 0 | 0 | 0 | 0 | 0 | 1 |
| Cluster17912;size=1                                           | 0 | 0 | 0 | 0 | 0 | 0 | 0 | 0 | 0 | 0 | 1 | 0 | 1 |
| Cluster17913 Actinobac Actinol Solirt Solirubr Solirubrobacte | 0 | 0 | 0 | 0 | 0 | 0 | 0 | 0 | 0 | 0 | 1 | 0 | 1 |
| Cluster17917 Proteobac Gammaproteobacteria                    | 0 | 0 | 0 | 0 | 0 | 0 | 0 | 0 | 0 | 0 | 1 | 0 | 1 |



|                                                               |   |   |   |   |   |   |   |   |   |   |   |   |   |
|---------------------------------------------------------------|---|---|---|---|---|---|---|---|---|---|---|---|---|
| Cluster17919 Proteobac Alphap Rhizobiales                     | 0 | 0 | 0 | 0 | 0 | 0 | 0 | 0 | 0 | 0 | 1 | 0 | 1 |
| Cluster17923 Verrucom Opitut; Opitu Opituta Opitutus          | 0 | 0 | 0 | 0 | 0 | 0 | 0 | 0 | 0 | 1 | 0 | 0 | 1 |
| Cluster17927 Acidobact Acidobacteria_Gp2 Gp2                  | 0 | 0 | 0 | 0 | 0 | 0 | 0 | 0 | 0 | 0 | 0 | 1 | 1 |
| Cluster17942 Actinobac Actinol Soliru Solirubr Solirubrobacte | 0 | 0 | 0 | 0 | 0 | 0 | 0 | 0 | 0 | 0 | 0 | 1 | 1 |
| Cluster17945 Proteobac Deltaproteobacteria                    | 0 | 0 | 0 | 0 | 0 | 0 | 0 | 0 | 0 | 0 | 1 | 0 | 1 |
| Cluster17952 Proteobac Alphaproteobacteria                    | 1 | 0 | 0 | 0 | 0 | 0 | 0 | 0 | 0 | 0 | 0 | 0 | 1 |
| Cluster17954 Acidobact Acidobacteria_Gp2 Gp2                  | 0 | 0 | 0 | 0 | 0 | 0 | 1 | 0 | 0 | 0 | 0 | 0 | 1 |
| Cluster17962 Proteobac Betaproteobacteria                     | 0 | 0 | 0 | 0 | 1 | 0 | 0 | 0 | 0 | 0 | 0 | 0 | 1 |
| Cluster17965 Acidobact Acidobacteria_Gp3 Gp3                  | 1 | 0 | 0 | 0 | 0 | 0 | 0 | 0 | 0 | 0 | 0 | 0 | 1 |
| Cluster17967;size=1                                           | 0 | 0 | 0 | 0 | 0 | 0 | 0 | 1 | 0 | 0 | 0 | 0 | 1 |
| Cluster17968 Acidobact Acidobacteria_Gp2 Gp2                  | 0 | 0 | 1 | 0 | 0 | 0 | 0 | 0 | 0 | 0 | 0 | 0 | 1 |
| Cluster17971 Acidobact Acidobacteria_Gp2 Gp2                  | 0 | 0 | 0 | 1 | 0 | 0 | 0 | 0 | 0 | 0 | 0 | 0 | 1 |
| Cluster17976 Acidobact Acidobacteria_Gp1 Gp1                  | 0 | 0 | 0 | 0 | 0 | 0 | 1 | 0 | 0 | 0 | 0 | 0 | 1 |
| Cluster17984 Proteobac Deltap Bdell Bdellovi Bdellovibrio     | 0 | 0 | 0 | 0 | 0 | 0 | 0 | 0 | 0 | 0 | 0 | 1 | 1 |
| Cluster17987 Bacteroid Sphing Sphingobacteriales              | 0 | 0 | 1 | 0 | 0 | 0 | 0 | 0 | 0 | 0 | 0 | 0 | 1 |
| Cluster17995 Proteobac Alphap Rhizobiales                     | 0 | 0 | 1 | 0 | 0 | 0 | 0 | 0 | 0 | 0 | 0 | 0 | 1 |
| Cluster17998 Armatimc Armati Arma Armatin Armatimonas/        | 0 | 0 | 0 | 0 | 0 | 0 | 0 | 0 | 0 | 0 | 0 | 1 | 1 |
| Cluster18004 Actinobac Actinol Acidi Acidimi Aciditerrimon    | 0 | 0 | 0 | 1 | 0 | 0 | 0 | 0 | 0 | 0 | 0 | 0 | 1 |
| Cluster18016 Proteobac Gamm Xanti Xanthor Stenotrophom        | 0 | 0 | 0 | 0 | 0 | 0 | 0 | 0 | 0 | 0 | 0 | 1 | 1 |
| Cluster18018 Proteobac Alphap Rhod Acetobacteraceae           | 0 | 0 | 0 | 0 | 0 | 0 | 0 | 0 | 0 | 1 | 0 | 0 | 1 |
| Cluster18024;size=2                                           | 0 | 0 | 0 | 0 | 0 | 0 | 0 | 0 | 0 | 0 | 1 | 0 | 1 |
| Cluster18029 Proteobac Alphap Rhizc Hyphon Rhodoplanes        | 0 | 0 | 0 | 0 | 0 | 0 | 0 | 0 | 0 | 0 | 1 | 0 | 1 |
| Cluster18035 Proteobac Betapr Burkholderiales                 | 0 | 0 | 0 | 0 | 0 | 0 | 0 | 1 | 0 | 0 | 0 | 0 | 1 |
| Cluster18036 Proteobac Deltaproteobacteria                    | 0 | 0 | 0 | 0 | 0 | 0 | 0 | 0 | 0 | 0 | 1 | 0 | 1 |
| Cluster18039 Acidobact Acidobacteria_Gp2 Gp2                  | 0 | 0 | 0 | 0 | 0 | 0 | 0 | 0 | 0 | 0 | 1 | 0 | 1 |
| Cluster18044 Chloroflex Ktedor Ktedc Ktedonc Ktedonobacter    | 0 | 0 | 0 | 0 | 0 | 0 | 0 | 0 | 0 | 0 | 1 | 0 | 1 |
| Cluster18053 Proteobac Gamm Xanti Sinobacteraceae             | 0 | 0 | 0 | 0 | 0 | 0 | 0 | 0 | 0 | 0 | 1 | 0 | 1 |
| Cluster18057;size=5                                           | 0 | 0 | 0 | 0 | 0 | 0 | 0 | 0 | 0 | 0 | 1 | 0 | 1 |
| Cluster18059 TM7 TM7_genera_i                                 | 0 | 0 | 0 | 0 | 0 | 0 | 0 | 0 | 0 | 0 | 1 | 0 | 1 |

|                                                          |   |   |   |   |   |   |   |   |   |   |   |   |   |
|----------------------------------------------------------|---|---|---|---|---|---|---|---|---|---|---|---|---|
| Cluster18060 Proteobac Deltaproteobacteria               | 0 | 0 | 0 | 0 | 0 | 0 | 1 | 0 | 0 | 0 | 0 | 0 | 1 |
| Cluster18063 Acidobact Acidobacteria_Gp1                 | 0 | 0 | 0 | 0 | 0 | 0 | 0 | 0 | 1 | 0 | 0 | 0 | 1 |
| Cluster18069 Proteobac Alphaproteobacteria               | 0 | 0 | 0 | 1 | 0 | 0 | 0 | 0 | 0 | 0 | 0 | 0 | 1 |
| Cluster18073 Acidobact Acidobacteria_Gp1 Gp1             | 1 | 0 | 0 | 0 | 0 | 0 | 0 | 0 | 0 | 0 | 0 | 0 | 1 |
| Cluster18082 Proteobac Alphaproteobacteria               | 0 | 0 | 0 | 0 | 0 | 0 | 0 | 1 | 0 | 0 | 0 | 0 | 1 |
| Cluster18085 Proteobac Alphap Rhizc Methylc Methylosinus | 0 | 0 | 0 | 0 | 0 | 0 | 0 | 1 | 0 | 0 | 0 | 0 | 1 |
| Cluster18097 Acidobact Acidobacteria_Gp2 Gp2             | 0 | 0 | 0 | 0 | 0 | 0 | 0 | 0 | 1 | 0 | 0 | 0 | 1 |
| Cluster18121 Cyanobac Chloroplast Chlorop Streptophyta   | 0 | 0 | 0 | 0 | 0 | 0 | 0 | 0 | 0 | 0 | 1 | 0 | 1 |
| Cluster18125;size=4                                      | 0 | 0 | 0 | 0 | 1 | 0 | 0 | 0 | 0 | 0 | 0 | 0 | 1 |
| Cluster18126 Proteobac Gammaproteobacteria               | 0 | 0 | 0 | 0 | 0 | 0 | 0 | 0 | 0 | 1 | 0 | 0 | 1 |
| Cluster18128 Actinobac Actinol Actin Actinos Actinospica | 0 | 1 | 0 | 0 | 0 | 0 | 0 | 0 | 0 | 0 | 0 | 0 | 1 |
| Cluster18137 OD1 OD1_genera_i                            | 0 | 0 | 0 | 0 | 0 | 0 | 0 | 0 | 0 | 0 | 0 | 1 | 1 |
| Cluster18138 Proteobac Gamm Xantl Sinobac Steroidobacter | 0 | 0 | 0 | 0 | 0 | 0 | 0 | 0 | 0 | 1 | 0 | 0 | 1 |
| Cluster18139;size=3                                      | 0 | 0 | 0 | 0 | 0 | 0 | 0 | 0 | 0 | 0 | 1 | 0 | 1 |
| Cluster18145 Acidobact Acidobacteria_Gp1                 | 0 | 0 | 0 | 0 | 0 | 0 | 0 | 0 | 0 | 0 | 1 | 0 | 1 |
| Cluster18152 Actinobac Actinol Actinomycetales           | 0 | 0 | 0 | 0 | 0 | 0 | 0 | 0 | 0 | 0 | 1 | 0 | 1 |
| Cluster18161 Proteobac Gammaproteobacteria               | 0 | 0 | 0 | 0 | 0 | 0 | 0 | 0 | 0 | 0 | 0 | 1 | 1 |
| Cluster18167 Acidobact Acidobacteria_Gp3 Gp3             | 0 | 0 | 0 | 1 | 0 | 0 | 0 | 0 | 0 | 0 | 0 | 0 | 1 |
| Cluster18171 Proteobac Betapr Burkl Burkhof Ralstonia    | 0 | 0 | 0 | 0 | 0 | 0 | 0 | 1 | 0 | 0 | 0 | 0 | 1 |
| Cluster18182 Proteobac Gamm Xantl Sinobac Steroidobacter | 0 | 0 | 0 | 0 | 0 | 0 | 0 | 0 | 0 | 1 | 0 | 0 | 1 |
| Cluster18183 Verrucom Opitut: Opitit Opituta Opitutus    | 0 | 0 | 0 | 0 | 0 | 0 | 0 | 0 | 0 | 0 | 0 | 1 | 1 |
| Cluster18190 TM7 TM7_genera_i                            | 0 | 1 | 0 | 0 | 0 | 0 | 0 | 0 | 0 | 0 | 0 | 0 | 1 |
| Cluster18191 Acidobact Acidobacteria_Gp3                 | 0 | 1 | 0 | 0 | 0 | 0 | 0 | 0 | 0 | 0 | 0 | 0 | 1 |
| Cluster18206 Proteobac Gammaproteobacteria               | 0 | 0 | 0 | 0 | 0 | 0 | 0 | 0 | 1 | 0 | 0 | 0 | 1 |
| Cluster18209 Proteobac Alphap Rhizobiales                | 0 | 0 | 0 | 0 | 0 | 0 | 0 | 0 | 0 | 0 | 1 | 0 | 1 |
| Cluster18212 Acidobact Acidobacteria_Gp1                 | 0 | 0 | 0 | 0 | 0 | 0 | 0 | 0 | 0 | 0 | 0 | 1 | 1 |
| Cluster18217 Proteobac Alphap Caulc Caulobacteraceae     | 0 | 0 | 1 | 0 | 0 | 0 | 0 | 0 | 0 | 0 | 0 | 0 | 1 |
| Cluster18219 Proteobac Alphaproteobacteria               | 1 | 0 | 0 | 0 | 0 | 0 | 0 | 0 | 0 | 0 | 0 | 0 | 1 |
| Cluster18235 Proteobac Alphap Rhod Acetobacteraceae      | 0 | 0 | 0 | 0 | 0 | 0 | 0 | 0 | 0 | 0 | 1 | 0 | 1 |

|              |           |                                    |   |   |   |   |   |   |   |   |   |   |   |   |   |
|--------------|-----------|------------------------------------|---|---|---|---|---|---|---|---|---|---|---|---|---|
| Cluster18236 | TM7       | TM7_genera_i                       | 0 | 0 | 0 | 0 | 0 | 0 | 0 | 1 | 0 | 0 | 0 | 0 | 1 |
| Cluster18240 | Proteobac | Alphap Rhod Acetobacteraceae       | 0 | 0 | 0 | 0 | 0 | 0 | 0 | 0 | 0 | 0 | 1 | 0 | 1 |
| Cluster18242 | Acidobact | Acidobacteria_Gp1 Edaphobacter     | 1 | 0 | 0 | 0 | 0 | 0 | 0 | 0 | 0 | 0 | 0 | 0 | 1 |
| Cluster18248 | Chlamydi  | Chlamy Chlar Parachlamydiaceae     | 0 | 0 | 0 | 0 | 0 | 0 | 1 | 0 | 0 | 0 | 0 | 0 | 1 |
| Cluster18252 | Proteobac | Alphap Rhizc Methylc Methylocystis | 0 | 0 | 0 | 0 | 0 | 0 | 0 | 0 | 0 | 0 | 1 | 0 | 1 |
| Cluster18257 | ;size=1   |                                    | 0 | 0 | 0 | 0 | 0 | 0 | 0 | 0 | 0 | 0 | 1 | 0 | 1 |
| Cluster18258 | Proteobac | Alphap Rhodospirillales            | 0 | 0 | 0 | 0 | 0 | 0 | 0 | 1 | 0 | 0 | 0 | 0 | 1 |
| Cluster18262 | Proteobac | Deltap Myxc Polyangiaceae          | 0 | 0 | 0 | 0 | 0 | 0 | 0 | 1 | 0 | 0 | 0 | 0 | 1 |
| Cluster18268 | Acidobact | Acidobacteria_Gp2 Gp2              | 0 | 0 | 0 | 0 | 0 | 0 | 0 | 0 | 0 | 0 | 0 | 1 | 1 |
| Cluster18270 | Acidobact | Acidobacteria_Gp1 Gp1              | 0 | 0 | 0 | 0 | 1 | 0 | 0 | 0 | 0 | 0 | 0 | 0 | 1 |
| Cluster18274 | Actinobac | Actinol Actinomycetales            | 0 | 0 | 1 | 0 | 0 | 0 | 0 | 0 | 0 | 0 | 0 | 0 | 1 |
| Cluster18284 | Proteobac | Alphap Rhod Rhodospirillaceae      | 0 | 0 | 0 | 0 | 0 | 0 | 0 | 0 | 0 | 0 | 1 | 0 | 1 |
| Cluster18292 | Proteobac | Alphaproteobacteria                | 0 | 0 | 0 | 0 | 0 | 0 | 0 | 1 | 0 | 0 | 0 | 0 | 1 |
| Cluster18297 | Acidobact | Acidobacteria_Gp2 Gp2              | 0 | 0 | 0 | 0 | 1 | 0 | 0 | 0 | 0 | 0 | 0 | 0 | 1 |
| Cluster18298 | Acidobact | Acidobacteria_Gp2 Gp2              | 0 | 0 | 0 | 0 | 0 | 0 | 0 | 0 | 0 | 0 | 1 | 0 | 1 |
| Cluster18300 | Acidobact | Acidobacteria_Gp2 Gp2              | 0 | 0 | 0 | 0 | 0 | 0 | 0 | 0 | 1 | 0 | 0 | 0 | 1 |
| Cluster18307 | Proteobac | Deltap Myxc Polyangiaceae          | 0 | 0 | 0 | 0 | 0 | 0 | 0 | 0 | 0 | 0 | 0 | 1 | 1 |
| Cluster18317 | Proteobac | Alphaproteobacteria                | 0 | 0 | 1 | 0 | 0 | 0 | 0 | 0 | 0 | 0 | 0 | 0 | 1 |
| Cluster18319 | Actinobac | Actinobacteria                     | 0 | 0 | 0 | 0 | 0 | 0 | 0 | 0 | 0 | 0 | 1 | 0 | 1 |
| Cluster18322 | Proteobac | Alphap Rhod Acetobz Acidisphaera   | 0 | 0 | 0 | 0 | 0 | 0 | 0 | 0 | 0 | 0 | 1 | 0 | 1 |
| Cluster18325 | Acidobact | Acidobacteria_Gp1                  | 0 | 0 | 0 | 0 | 0 | 0 | 0 | 1 | 0 | 0 | 0 | 0 | 1 |
| Cluster18328 | Acidobact | Acidobacteria_Gp3 Gp3              | 0 | 0 | 0 | 0 | 0 | 0 | 0 | 0 | 0 | 0 | 1 | 0 | 1 |
| Cluster18329 | TM7       | TM7_genera_i                       | 0 | 1 | 0 | 0 | 0 | 0 | 0 | 0 | 0 | 0 | 0 | 0 | 1 |
| Cluster18330 | Actinobac | Actinol Actinomycetales            | 0 | 0 | 0 | 0 | 0 | 0 | 1 | 0 | 0 | 0 | 0 | 0 | 1 |
| Cluster18338 | Acidobact | Acidobacteria_Gp2 Gp2              | 0 | 0 | 0 | 1 | 0 | 0 | 0 | 0 | 0 | 0 | 0 | 0 | 1 |
| Cluster18348 | Proteobac | Gammaproteobacteria                | 0 | 0 | 0 | 0 | 0 | 0 | 0 | 0 | 0 | 0 | 1 | 0 | 1 |
| Cluster18353 | Acidobact | Acidobacteria_Gp2 Gp2              | 0 | 0 | 0 | 0 | 0 | 0 | 0 | 0 | 0 | 1 | 0 | 0 | 1 |
| Cluster18356 | Acidobact | Acidobacteria_Gp1                  | 0 | 0 | 0 | 0 | 0 | 0 | 0 | 0 | 0 | 0 | 0 | 1 | 1 |
| Cluster18357 | Proteobac | Alphap Rhizobiales                 | 0 | 0 | 0 | 0 | 0 | 0 | 0 | 1 | 0 | 0 | 0 | 0 | 1 |

|              |                                               |   |   |   |   |   |   |   |   |   |   |   |   |   |
|--------------|-----------------------------------------------|---|---|---|---|---|---|---|---|---|---|---|---|---|
| Cluster18359 | Armatimc Chthor Chtho Chthono Chthonomona     | 0 | 0 | 0 | 0 | 0 | 0 | 0 | 1 | 0 | 0 | 0 | 0 | 1 |
| Cluster18361 | Proteobac Betapr Burkl Burkhol Paucimonas     | 0 | 0 | 0 | 0 | 0 | 0 | 0 | 0 | 0 | 0 | 0 | 1 | 1 |
| Cluster18362 | Proteobac Alphap Rhod Acetobz Acidisphaera    | 0 | 0 | 1 | 0 | 0 | 0 | 0 | 0 | 0 | 0 | 0 | 0 | 1 |
| Cluster18364 | Proteobac Alphap Rhodospirillales             | 0 | 0 | 0 | 1 | 0 | 0 | 0 | 0 | 0 | 0 | 0 | 0 | 1 |
| Cluster18369 | Acidobact Acidobacteria_Gp3 Gp3               | 0 | 0 | 0 | 0 | 0 | 0 | 0 | 0 | 1 | 0 | 0 | 0 | 1 |
| Cluster18371 | Proteobac Gammaproteobacteria                 | 0 | 0 | 0 | 1 | 0 | 0 | 0 | 0 | 0 | 0 | 0 | 0 | 1 |
| Cluster18373 | Proteobac Alphap Rhod Rhodos  Telmatospirillu | 0 | 0 | 0 | 0 | 0 | 0 | 0 | 1 | 0 | 0 | 0 | 0 | 1 |
| Cluster18382 | Acidobact Acidobacteria_Gp3 Bryobacter        | 0 | 0 | 0 | 0 | 0 | 0 | 0 | 0 | 0 | 0 | 0 | 1 | 1 |
| Cluster18385 | Chloroflex Ktedor Ktedonobacterales           | 0 | 0 | 0 | 0 | 0 | 0 | 0 | 0 | 0 | 0 | 1 | 0 | 1 |
| Cluster18387 | Acidobact Acidobacteria_Gp1 Acidobacteriur    | 0 | 0 | 0 | 0 | 0 | 0 | 0 | 0 | 0 | 0 | 1 | 0 | 1 |
| Cluster18388 | Acidobact Acidobacteria_Gp3 Gp3               | 0 | 0 | 0 | 0 | 0 | 0 | 0 | 0 | 0 | 0 | 0 | 1 | 1 |
| Cluster18389 | Acidobact Acidobacteria_Gp3 Gp3               | 0 | 0 | 0 | 1 | 0 | 0 | 0 | 0 | 0 | 0 | 0 | 0 | 1 |
| Cluster18395 | Bacteroidetes                                 | 0 | 0 | 0 | 0 | 0 | 0 | 0 | 0 | 0 | 0 | 1 | 0 | 1 |
| Cluster18397 | Proteobac Alphaproteobacteria                 | 0 | 0 | 0 | 0 | 0 | 0 | 0 | 1 | 0 | 0 | 0 | 0 | 1 |
| Cluster18399 | Proteobac Alphap Rhod Acetobacteraceae        | 0 | 0 | 0 | 0 | 0 | 0 | 0 | 0 | 0 | 0 | 1 | 0 | 1 |
| Cluster18400 | Actinobac Actinol Actinomycetales             | 0 | 0 | 0 | 0 | 0 | 0 | 0 | 0 | 0 | 0 | 1 | 0 | 1 |
| Cluster18406 | Acidobact Acidobacteria_Gp2 Gp2               | 0 | 0 | 0 | 0 | 0 | 0 | 1 | 0 | 0 | 0 | 0 | 0 | 1 |
| Cluster18408 | Acidobact Acidobacteria_Gp2 Gp2               | 0 | 0 | 0 | 0 | 0 | 0 | 0 | 0 | 0 | 0 | 0 | 1 | 1 |
| Cluster18411 | Proteobac Alphap Rhodospirillales             | 0 | 0 | 0 | 0 | 0 | 0 | 0 | 1 | 0 | 0 | 0 | 0 | 1 |
| Cluster18420 | Proteobac Betapr Rhod Rhodocyclaceae          | 0 | 0 | 1 | 0 | 0 | 0 | 0 | 0 | 0 | 0 | 0 | 0 | 1 |
| Cluster18427 | Proteobac Gamm Xantl Sinobac Steroidobacter   | 1 | 0 | 0 | 0 | 0 | 0 | 0 | 0 | 0 | 0 | 0 | 0 | 1 |
| Cluster18430 | Acidobact Acidobacteria_Gp2 Gp2               | 0 | 0 | 0 | 0 | 0 | 0 | 0 | 0 | 0 | 1 | 0 | 0 | 1 |
| Cluster18432 | Acidobact Acidobacteria_Gp1                   | 0 | 0 | 0 | 0 | 0 | 0 | 0 | 0 | 0 | 0 | 1 | 0 | 1 |
| Cluster18438 | Acidobact Acidobacteria_Gp2 Gp2               | 0 | 0 | 0 | 0 | 1 | 0 | 0 | 0 | 0 | 0 | 0 | 0 | 1 |
| Cluster18448 | Acidobact Acidobacteria_Gp2 Gp2               | 0 | 0 | 0 | 0 | 0 | 0 | 0 | 0 | 0 | 0 | 0 | 1 | 1 |
| Cluster18451 | Proteobac Alphap Alphaproteot Rhizomicrobiu   | 0 | 0 | 0 | 0 | 0 | 0 | 0 | 0 | 0 | 0 | 1 | 0 | 1 |
| Cluster18458 | Bacteroid Sphing Sphir Cytophz Adhaeribacter  | 0 | 1 | 0 | 0 | 0 | 0 | 0 | 0 | 0 | 0 | 0 | 0 | 1 |
| Cluster18463 | Acidobact Acidobacteria_Gp1 Gp1               | 0 | 0 | 0 | 0 | 0 | 0 | 0 | 0 | 0 | 0 | 1 | 0 | 1 |
| Cluster18474 | Proteobac Alphaproteobacteria                 | 0 | 0 | 0 | 0 | 0 | 0 | 0 | 1 | 0 | 0 | 0 | 0 | 1 |

|                                                           |   |   |   |   |   |   |   |   |   |   |   |   |   |
|-----------------------------------------------------------|---|---|---|---|---|---|---|---|---|---|---|---|---|
| Cluster18478 Acidobact Acidobacteria_Gp3                  | 0 | 0 | 0 | 1 | 0 | 0 | 0 | 0 | 0 | 0 | 0 | 0 | 1 |
| Cluster18483 Proteobac Gamm Xantl Sinobac Steroidobacter  | 0 | 0 | 0 | 0 | 0 | 0 | 0 | 1 | 0 | 0 | 0 | 0 | 1 |
| Cluster18495 Acidobact Acidobacteria_Gp2 Gp2              | 0 | 0 | 0 | 0 | 0 | 0 | 0 | 0 | 0 | 0 | 1 | 0 | 1 |
| Cluster18498 Proteobac Gammaproteobacteria                | 0 | 0 | 0 | 0 | 0 | 0 | 0 | 0 | 0 | 0 | 1 | 0 | 1 |
| Cluster18499 Acidobact Acidobacteria_Gp2 Gp2              | 0 | 0 | 0 | 0 | 0 | 0 | 0 | 0 | 1 | 0 | 0 | 0 | 1 |
| Cluster18502;size=1                                       | 0 | 0 | 0 | 0 | 0 | 0 | 0 | 0 | 0 | 0 | 1 | 0 | 1 |
| Cluster18503 Proteobac Alphap Rhodospirillales            | 0 | 0 | 0 | 0 | 0 | 0 | 0 | 0 | 0 | 0 | 0 | 1 | 1 |
| Cluster18507 Acidobact Acidobacteria_Gp2 Gp2              | 0 | 1 | 0 | 0 | 0 | 0 | 0 | 0 | 0 | 0 | 0 | 0 | 1 |
| Cluster18518 Verrucom Subdivision3 Subdivision3_ε         | 0 | 0 | 0 | 0 | 0 | 1 | 0 | 0 | 0 | 0 | 0 | 0 | 1 |
| Cluster18519 Acidobact Acidobacteria_Gp1                  | 0 | 0 | 0 | 0 | 0 | 0 | 0 | 0 | 1 | 0 | 0 | 0 | 1 |
| Cluster18521 Acidobact Acidobacteria_Gp1                  | 0 | 0 | 0 | 0 | 0 | 0 | 0 | 0 | 0 | 0 | 1 | 0 | 1 |
| Cluster18525 Acidobact Acidobacteria_Gp2 Gp2              | 0 | 0 | 0 | 0 | 0 | 0 | 0 | 0 | 1 | 0 | 0 | 0 | 1 |
| Cluster18528 Proteobac Betaproteobacteria                 | 0 | 0 | 0 | 0 | 0 | 0 | 0 | 0 | 0 | 0 | 0 | 1 | 1 |
| Cluster18541 Acidobact Acidobacteria_Gp2 Gp2              | 0 | 0 | 0 | 0 | 0 | 0 | 0 | 1 | 0 | 0 | 0 | 0 | 1 |
| Cluster18543 Acidobact Acidobacteria_Gp13 Gp13            | 0 | 0 | 0 | 0 | 0 | 0 | 0 | 0 | 1 | 0 | 0 | 0 | 1 |
| Cluster18545;size=1                                       | 0 | 0 | 0 | 0 | 0 | 0 | 0 | 0 | 0 | 0 | 0 | 1 | 1 |
| Cluster18548 Acidobact Acidobacteria_Gp2 Gp2              | 0 | 0 | 0 | 0 | 0 | 0 | 0 | 0 | 1 | 0 | 0 | 0 | 1 |
| Cluster18552 Acidobact Acidobacteria_Gp2 Gp2              | 1 | 0 | 0 | 0 | 0 | 0 | 0 | 0 | 0 | 0 | 0 | 0 | 1 |
| Cluster18556 Chlamydi: Chlamy Chlar Parachlamydiaceae     | 0 | 0 | 0 | 0 | 0 | 0 | 1 | 0 | 0 | 0 | 0 | 0 | 1 |
| Cluster18560 Acidobact Acidobacteria_Gp3                  | 0 | 0 | 0 | 0 | 0 | 0 | 0 | 0 | 0 | 0 | 0 | 1 | 1 |
| Cluster18562 Acidobact Acidobacteria_Gp2 Gp2              | 0 | 0 | 0 | 1 | 0 | 0 | 0 | 0 | 0 | 0 | 0 | 0 | 1 |
| Cluster18571 Proteobac Deltap Bdell Bdellovi Bdellovibrio | 0 | 0 | 0 | 0 | 0 | 0 | 0 | 0 | 1 | 0 | 0 | 0 | 1 |
| Cluster18574 Proteobac Gamm Xantl Sinobac Steroidobacter  | 0 | 0 | 0 | 0 | 0 | 0 | 0 | 0 | 0 | 0 | 0 | 1 | 1 |
| Cluster18575 Acidobact Acidobacteria_Gp3 Gp3              | 0 | 0 | 0 | 0 | 0 | 0 | 0 | 0 | 0 | 0 | 0 | 1 | 1 |
| Cluster18578 Chloroflex Ktedor Ktedonobacterales          | 0 | 0 | 0 | 0 | 0 | 1 | 0 | 0 | 0 | 0 | 0 | 0 | 1 |
| Cluster18581 Proteobac Alphap Caulc Caulobacteraceae      | 0 | 0 | 0 | 0 | 0 | 0 | 0 | 0 | 1 | 0 | 0 | 0 | 1 |
| Cluster18590 Proteobac Alphaproteobacteria                | 0 | 0 | 0 | 0 | 0 | 0 | 0 | 0 | 1 | 0 | 0 | 0 | 1 |
| Cluster18592 Acidobact Acidobacteria_Gp2 Gp2              | 0 | 0 | 0 | 0 | 0 | 0 | 0 | 0 | 1 | 0 | 0 | 0 | 1 |
| Cluster18594 Proteobacteria                               | 0 | 0 | 0 | 0 | 0 | 0 | 0 | 0 | 1 | 0 | 0 | 0 | 1 |

|                                                                |   |   |   |   |   |   |   |   |   |   |   |   |   |
|----------------------------------------------------------------|---|---|---|---|---|---|---|---|---|---|---|---|---|
| Cluster18609 Acidobact Acidobacteria_Gp2 Gp2                   | 0 | 0 | 0 | 0 | 0 | 0 | 0 | 0 | 0 | 0 | 0 | 1 | 1 |
| Cluster18612;size=1                                            | 0 | 0 | 0 | 0 | 0 | 0 | 0 | 0 | 1 | 0 | 0 | 0 | 1 |
| Cluster18620;size=1                                            | 0 | 0 | 0 | 0 | 0 | 0 | 0 | 0 | 0 | 0 | 0 | 1 | 1 |
| Cluster18630 Acidobact Acidobacteria_Gp3 Gp3                   | 0 | 0 | 0 | 0 | 0 | 0 | 0 | 1 | 0 | 0 | 0 | 0 | 1 |
| Cluster18634 Proteobac Alphap Rhizc Bradyrh Bosea              | 0 | 0 | 0 | 0 | 0 | 0 | 0 | 0 | 0 | 0 | 0 | 1 | 1 |
| Cluster18653 Actinobac Actinol Solirub Solirubr Solirubrobacte | 0 | 0 | 0 | 0 | 0 | 0 | 1 | 0 | 0 | 0 | 0 | 0 | 1 |
| Cluster18655 Acidobacteria                                     | 0 | 0 | 0 | 0 | 0 | 0 | 0 | 0 | 0 | 0 | 0 | 1 | 1 |
| Cluster18669 Actinobac Actinol Actin Actinos Actinospica       | 0 | 0 | 0 | 0 | 0 | 0 | 0 | 1 | 0 | 0 | 0 | 0 | 1 |
| Cluster18676 Acidobact Acidobacteria_Gp2 Gp2                   | 0 | 0 | 0 | 0 | 0 | 0 | 1 | 0 | 0 | 0 | 0 | 0 | 1 |
| Cluster18691 Acidobact Acidobacteria_Gp3 Gp3                   | 1 | 0 | 0 | 0 | 0 | 0 | 0 | 0 | 0 | 0 | 0 | 0 | 1 |
| Cluster18704 Proteobac Deltap Myxococcales                     | 0 | 0 | 0 | 0 | 0 | 0 | 0 | 0 | 0 | 0 | 0 | 1 | 1 |
| Cluster18705;size=1                                            | 0 | 0 | 0 | 0 | 0 | 0 | 0 | 0 | 0 | 0 | 1 | 0 | 1 |
| Cluster18707 Acidobact Acidobacteria_Gp2 Gp2                   | 0 | 0 | 1 | 0 | 0 | 0 | 0 | 0 | 0 | 0 | 0 | 0 | 1 |
| Cluster18710 Actinobac Actinol Acidi Acidimii Aciditerrimona   | 0 | 0 | 0 | 0 | 0 | 0 | 0 | 0 | 0 | 0 | 0 | 1 | 1 |
| Cluster18716 Proteobac Gamm Legio Coxiella Aquicella           | 0 | 0 | 0 | 0 | 0 | 0 | 0 | 0 | 1 | 0 | 0 | 0 | 1 |
| Cluster18726 Proteobac Alphap Rhodospirillales                 | 0 | 0 | 0 | 0 | 0 | 0 | 0 | 0 | 0 | 0 | 0 | 1 | 1 |
| Cluster18736 Acidobact Acidobacteria_Gp3 Gp3                   | 0 | 0 | 0 | 0 | 0 | 0 | 0 | 0 | 1 | 0 | 0 | 0 | 1 |
| Cluster18743 Acidobact Acidobacteria_Gp2 Gp2                   | 0 | 0 | 0 | 0 | 0 | 0 | 0 | 0 | 0 | 0 | 0 | 1 | 1 |
| Cluster18759;size=4                                            | 0 | 0 | 0 | 0 | 0 | 0 | 0 | 0 | 1 | 0 | 0 | 0 | 1 |
| Cluster18777 Proteobac Deltaproteobacteria                     | 0 | 0 | 0 | 0 | 0 | 0 | 0 | 0 | 0 | 0 | 0 | 1 | 1 |
| Cluster18778;size=1                                            | 0 | 0 | 0 | 0 | 0 | 0 | 0 | 0 | 0 | 0 | 0 | 1 | 1 |
| Cluster18783 Proteobac Alphaproteobacteria                     | 0 | 1 | 0 | 0 | 0 | 0 | 0 | 0 | 0 | 0 | 0 | 0 | 1 |
| Cluster18784 Acidobact Acidobacteria_Gp1 Gp1                   | 0 | 0 | 0 | 0 | 0 | 1 | 0 | 0 | 0 | 0 | 0 | 0 | 1 |
| Cluster18790 Proteobac Gamm Legio Coxiella Aquicella           | 0 | 0 | 0 | 1 | 0 | 0 | 0 | 0 | 0 | 0 | 0 | 0 | 1 |
| Cluster18791 Armatimc Armati Arma Armatin Armatimonas/         | 0 | 0 | 0 | 0 | 0 | 0 | 0 | 0 | 1 | 0 | 0 | 0 | 1 |
| Cluster18805 Acidobact Acidobacteria_Gp3                       | 1 | 0 | 0 | 0 | 0 | 0 | 0 | 0 | 0 | 0 | 0 | 0 | 1 |
| Cluster18815;size=1                                            | 0 | 0 | 0 | 0 | 0 | 0 | 0 | 0 | 0 | 0 | 0 | 1 | 1 |
| Cluster18817;size=1                                            | 0 | 0 | 0 | 0 | 0 | 0 | 0 | 0 | 0 | 0 | 0 | 1 | 1 |
| Cluster18823;size=1                                            | 0 | 0 | 0 | 0 | 0 | 0 | 0 | 0 | 1 | 0 | 0 | 0 | 1 |

|              |            |                   |                  |          |               |   |   |   |   |   |   |   |   |   |
|--------------|------------|-------------------|------------------|----------|---------------|---|---|---|---|---|---|---|---|---|
| Cluster18826 | Acidobact  | Acidobacteria_Gp3 | Gp3              | 0        | 0             | 0 | 0 | 0 | 0 | 0 | 0 | 0 | 1 | 1 |
| Cluster18831 | Acidobact  | Acidobacteria_Gp2 | Gp2              | 0        | 0             | 0 | 0 | 0 | 0 | 0 | 0 | 1 | 0 | 0 |
| Cluster18843 |            |                   | size=2           | 0        | 0             | 0 | 0 | 0 | 0 | 0 | 0 | 0 | 0 | 1 |
| Cluster18851 | Acidobact  | Acidobacteria_Gp3 |                  | 0        | 0             | 0 | 0 | 0 | 0 | 0 | 1 | 0 | 0 | 0 |
| Cluster18856 |            |                   | size=3           | 0        | 0             | 0 | 0 | 0 | 0 | 0 | 0 | 0 | 0 | 1 |
| Cluster18864 | Proteobac  | Gamm              | Legio            | Coxiella | Aquicella     |   |   |   |   |   |   |   |   |   |
| Cluster18865 | Verrucom   | Opitut            | Opitut           | Opituta  | Opitutus      |   |   |   |   |   |   |   |   |   |
| Cluster18869 | Acidobact  | Acidobacteria_Gp2 | Gp2              | 0        | 0             | 0 | 0 | 0 | 0 | 0 | 0 | 0 | 1 | 0 |
| Cluster18871 | Proteobac  | Deltap            | Bdell            | Bdellovi | Bdellovibrio  |   |   |   |   |   |   |   |   |   |
| Cluster18876 | Acidobact  | Acidobacteria_Gp3 | Gp3              | 0        | 0             | 0 | 0 | 0 | 0 | 0 | 1 | 0 | 0 | 0 |
| Cluster18877 | Acidobact  | Acidobacteria_Gp1 |                  | 0        | 0             | 0 | 0 | 0 | 0 | 0 | 1 | 0 | 0 | 0 |
| Cluster18881 | Proteobac  | Betapr            | Burkholderiales  |          |               |   |   |   |   |   |   |   |   |   |
| Cluster18883 | Acidobact  | Acidobacteria_Gp2 | Gp2              | 0        | 0             | 0 | 0 | 0 | 0 | 0 | 0 | 0 | 0 | 1 |
| Cluster18891 | Acidobact  | Acidobacteria_Gp2 | Gp2              | 0        | 0             | 0 | 0 | 0 | 1 | 0 | 0 | 0 | 0 | 0 |
| Cluster18893 |            |                   | size=12          | 0        | 0             | 0 | 0 | 0 | 1 | 0 | 0 | 0 | 0 | 0 |
| Cluster18894 | Gemmatir   | Gemm              | Gem              | Gemma    | Gemmatimonas  |   |   |   |   |   |   |   |   |   |
| Cluster18898 | Chloroflex | Ktedor            | Ktedo            | Ktedon   | Ktedonobacter |   |   |   |   |   |   |   |   |   |
| Cluster18899 |            |                   | size=1           | 0        | 0             | 0 | 0 | 0 | 0 | 0 | 1 | 0 | 0 | 0 |
| Cluster18901 | Acidobact  | Acidobacteria_Gp2 | Gp2              | 0        | 0             | 0 | 0 | 0 | 0 | 0 | 0 | 0 | 1 | 0 |
| Cluster18904 | Acidobact  | Acidobacteria_Gp3 | Gp3              | 0        | 0             | 0 | 0 | 0 | 0 | 0 | 0 | 1 | 0 | 0 |
| Cluster18905 | Acidobact  | Acidobacteria_Gp2 | Gp2              | 0        | 0             | 0 | 0 | 0 | 0 | 0 | 0 | 1 | 0 | 0 |
| Cluster18910 | Acidobact  | Acidobacteria_Gp5 | Gp5              | 0        | 0             | 0 | 0 | 0 | 0 | 0 | 0 | 1 | 0 | 0 |
| Cluster18911 | Actinobac  | Actinol           | Actinomycetales  |          |               |   |   |   |   |   |   |   |   |   |
| Cluster18915 |            |                   | size=5           | 0        | 0             | 0 | 0 | 0 | 0 | 0 | 1 | 0 | 0 | 0 |
| Cluster18918 | Proteobac  | Alphap            | Rhod             | Acetob   | Acidisphaera  |   |   |   |   |   |   |   |   |   |
| Cluster18920 | Proteobac  | Alphap            | Rhodospirillales |          |               |   |   |   |   |   |   |   |   |   |
| Cluster18921 | Acidobact  | Acidobacteria_Gp3 |                  | 0        | 0             | 0 | 0 | 1 | 0 | 0 | 0 | 0 | 0 | 0 |
| Cluster18923 | Acidobact  | Acidobacteria_Gp3 | Gp3              | 0        | 0             | 0 | 0 | 0 | 0 | 0 | 0 | 0 | 1 | 0 |
| Cluster18927 | Acidobact  | Acidobacteria_Gp1 |                  | 0        | 0             | 0 | 0 | 0 | 0 | 0 | 0 | 1 | 0 | 0 |

|               |                       |                                    |   |   |   |   |   |   |   |   |   |   |   |   |
|---------------|-----------------------|------------------------------------|---|---|---|---|---|---|---|---|---|---|---|---|
| Cluster18932  | Verrucom Subdivision3 | Subdivision3_ξ                     | 0 | 0 | 0 | 0 | 0 | 0 | 0 | 0 | 1 | 0 | 0 | 1 |
| Cluster18933  | Proteobac             | Alphap Rhod Acetobacteraceae       | 0 | 0 | 0 | 0 | 0 | 0 | 0 | 0 | 1 | 0 | 0 | 1 |
| Cluster18937  | Firmicute:            | Bacilli Bacill Alicyclobacillaceae | 0 | 0 | 0 | 0 | 0 | 0 | 0 | 0 | 0 | 0 | 1 | 1 |
| Cluster18939  | Proteobac             | Alphap Rhizobiales                 | 0 | 0 | 0 | 0 | 0 | 0 | 0 | 0 | 1 | 0 | 0 | 1 |
| Cluster18944  | Armatimonadetes       | Armatimonade                       | 0 | 0 | 0 | 0 | 0 | 0 | 0 | 0 | 1 | 0 | 0 | 1 |
| Cluster18947  | Proteobacteria        |                                    | 0 | 0 | 0 | 0 | 0 | 0 | 0 | 1 | 0 | 0 | 0 | 1 |
| Cluster18951  | Acidobact             | Acidobacteria_Gp2 Gp2              | 0 | 0 | 0 | 0 | 0 | 0 | 1 | 0 | 0 | 0 | 0 | 1 |
| Cluster18953  | Proteobac             | Alphaproteobacteria                | 1 | 0 | 0 | 0 | 0 | 0 | 0 | 0 | 0 | 0 | 0 | 1 |
| Cluster18967; | size=3                |                                    | 0 | 0 | 0 | 0 | 0 | 1 | 0 | 0 | 0 | 0 | 0 | 1 |
| Cluster18975  | Proteobac             | Betapr Rhod Rhodocyclaceae         | 0 | 0 | 0 | 0 | 1 | 0 | 0 | 0 | 0 | 0 | 0 | 1 |
| Cluster18976  | Bacteroid             | Sphing Sphir Chitinophagaceae      | 0 | 0 | 0 | 0 | 0 | 0 | 0 | 0 | 0 | 0 | 1 | 1 |
| Cluster18984  | Bacteroid             | Sphing Sphir Chitinophagaceae      | 0 | 0 | 1 | 0 | 0 | 0 | 0 | 0 | 0 | 0 | 0 | 1 |
| Cluster18986  | Proteobac             | Betapr Burkl Burkhol Burkholderia  | 0 | 0 | 0 | 0 | 0 | 0 | 0 | 0 | 1 | 0 | 0 | 1 |
| Cluster18989  | Proteobac             | Gamm Pseu Pseudomonadaceae         | 0 | 0 | 0 | 0 | 0 | 0 | 0 | 1 | 0 | 0 | 0 | 1 |
| Cluster18994  | Acidobact             | Acidobacteria_Gp2 Gp2              | 0 | 0 | 0 | 0 | 0 | 1 | 0 | 0 | 0 | 0 | 0 | 1 |
| Cluster18998  | Proteobac             | Alphaproteobacteria                | 0 | 0 | 1 | 0 | 0 | 0 | 0 | 0 | 0 | 0 | 0 | 1 |
| Cluster18999; | size=3                |                                    | 0 | 0 | 0 | 0 | 0 | 0 | 1 | 0 | 0 | 0 | 0 | 1 |
| Cluster19003  | Acidobact             | Acidobacteria_Gp1                  | 0 | 0 | 0 | 0 | 0 | 0 | 0 | 0 | 1 | 0 | 0 | 1 |
| Cluster19010  | TM7                   | TM7_genera_i                       | 0 | 0 | 1 | 0 | 0 | 0 | 0 | 0 | 0 | 0 | 0 | 1 |
| Cluster19011  | Gemmatir              | Gemm Gemı Gemma Gemmatimonad       | 0 | 0 | 0 | 0 | 0 | 0 | 0 | 0 | 0 | 1 | 0 | 1 |
| Cluster19012  | Acidobacteria         |                                    | 0 | 0 | 0 | 0 | 0 | 0 | 0 | 0 | 0 | 1 | 0 | 1 |
| Cluster19014; | size=2                |                                    | 0 | 0 | 0 | 0 | 0 | 0 | 0 | 0 | 0 | 0 | 1 | 1 |
| Cluster19017; | size=7                |                                    | 0 | 0 | 0 | 0 | 0 | 0 | 1 | 0 | 0 | 0 | 0 | 1 |
| Cluster19019  | Proteobac             | Deltaproteobacteria                | 0 | 0 | 0 | 0 | 0 | 0 | 0 | 0 | 1 | 0 | 0 | 1 |
| Cluster19028  | Actinobac             | Actinol Actinomycetales            | 0 | 0 | 0 | 0 | 0 | 0 | 0 | 0 | 0 | 0 | 1 | 1 |
| Cluster19032; | size=1                |                                    | 0 | 0 | 0 | 0 | 0 | 0 | 1 | 0 | 0 | 0 | 0 | 1 |
| Cluster19038  | Acidobact             | Acidobacteria_Gp3 Gp3              | 0 | 0 | 0 | 0 | 0 | 1 | 0 | 0 | 0 | 0 | 0 | 1 |
| Cluster19039  | Proteobac             | Alphaproteobacteria                | 0 | 0 | 0 | 0 | 0 | 0 | 0 | 0 | 0 | 1 | 0 | 1 |
| Cluster19043  | Proteobac             | Alphap Rhizobiales                 | 0 | 0 | 0 | 0 | 0 | 0 | 0 | 0 | 0 | 1 | 0 | 1 |



|                                                         |   |   |   |   |   |   |   |   |   |   |   |   |   |
|---------------------------------------------------------|---|---|---|---|---|---|---|---|---|---|---|---|---|
| Cluster19052 Acidobact Acidobacteria_Gp2 Gp2            | 0 | 0 | 0 | 0 | 0 | 0 | 0 | 1 | 0 | 0 | 0 | 0 | 1 |
| Cluster19054 Acidobact Acidobacteria_Gp2 Gp2            | 0 | 0 | 0 | 0 | 0 | 1 | 0 | 0 | 0 | 0 | 0 | 0 | 1 |
| Cluster19072 Proteobac Alphap Rhizobiales               | 0 | 0 | 0 | 0 | 0 | 0 | 0 | 1 | 0 | 0 | 0 | 0 | 1 |
| Cluster19084 Proteobac Gammaproteobacteria              | 0 | 0 | 0 | 0 | 0 | 0 | 0 | 0 | 0 | 0 | 1 | 0 | 1 |
| Cluster19088 Armatimc Chthor Chth Chthon Chthonomona    | 0 | 0 | 0 | 0 | 0 | 0 | 0 | 0 | 0 | 0 | 1 | 0 | 1 |
| Cluster19089 Acidobact Acidobacteria_Gp3 Gp3            | 0 | 0 | 0 | 0 | 0 | 0 | 0 | 0 | 0 | 0 | 1 | 0 | 1 |
| Cluster19099 Proteobac Alphap Rhod Acetobacteraceae     | 0 | 0 | 0 | 1 | 0 | 0 | 0 | 0 | 0 | 0 | 0 | 0 | 1 |
| Cluster19101;size=7                                     | 0 | 0 | 0 | 1 | 0 | 0 | 0 | 0 | 0 | 0 | 0 | 0 | 1 |
| Cluster19102 Proteobac Deltaproteobacteria              | 0 | 0 | 0 | 0 | 0 | 0 | 0 | 0 | 0 | 1 | 0 | 0 | 1 |
| Cluster19103 Verrucom Opitut Opituta Opitutus           | 0 | 0 | 0 | 0 | 0 | 0 | 0 | 0 | 0 | 1 | 0 | 0 | 1 |
| Cluster19110 Proteobac Deltaproteobacteria              | 0 | 0 | 0 | 0 | 0 | 0 | 0 | 0 | 0 | 1 | 0 | 0 | 1 |
| Cluster19117 Proteobac Gammaproteobacteria              | 0 | 0 | 0 | 0 | 0 | 0 | 0 | 1 | 0 | 0 | 0 | 0 | 1 |
| Cluster19129 Acidobact Acidobacteria_Gp1 Gp1            | 0 | 0 | 0 | 0 | 0 | 0 | 0 | 0 | 0 | 1 | 0 | 0 | 1 |
| Cluster19139 Acidobact Acidobacteria_Gp2 Gp2            | 0 | 0 | 1 | 0 | 0 | 0 | 0 | 0 | 0 | 0 | 0 | 0 | 1 |
| Cluster19145 Acidobact Acidobacteria_Gp1                | 0 | 0 | 0 | 1 | 0 | 0 | 0 | 0 | 0 | 0 | 0 | 0 | 1 |
| Cluster19150 Proteobac Gamm Xant Sinobac Steroidobacter | 0 | 0 | 0 | 0 | 0 | 0 | 0 | 0 | 0 | 0 | 1 | 0 | 1 |
| Cluster19151 Proteobac Alphaproteobacteria              | 0 | 0 | 0 | 0 | 0 | 0 | 0 | 0 | 0 | 1 | 0 | 0 | 1 |
| Cluster19152 Proteobac Alphap Caulc Caulob Caulobacter  | 0 | 0 | 0 | 0 | 0 | 0 | 0 | 0 | 0 | 1 | 0 | 0 | 1 |
| Cluster19155 Proteobac Alphap Rhizobiales               | 0 | 0 | 0 | 0 | 0 | 0 | 0 | 1 | 0 | 0 | 0 | 0 | 1 |
| Cluster19156 Proteobacteria                             | 0 | 0 | 0 | 0 | 0 | 0 | 0 | 0 | 0 | 1 | 0 | 0 | 1 |
| Cluster19166 Acidobact Acidobacteria_Gp2 Gp2            | 0 | 0 | 0 | 0 | 0 | 0 | 0 | 1 | 0 | 0 | 0 | 0 | 1 |
| Cluster19168 Acidobact Acidobacteria_Gp3 Gp3            | 0 | 0 | 0 | 0 | 0 | 0 | 0 | 0 | 0 | 0 | 0 | 1 | 1 |
| Cluster19169;size=1                                     | 0 | 0 | 0 | 0 | 0 | 0 | 0 | 0 | 1 | 0 | 0 | 0 | 1 |
| Cluster19170 Proteobac Gammaproteobacteria              | 0 | 0 | 1 | 0 | 0 | 0 | 0 | 0 | 0 | 0 | 0 | 0 | 1 |
| Cluster19173 Proteobac Gamm Xant Sinobac Steroidobacter | 0 | 0 | 0 | 0 | 0 | 0 | 0 | 0 | 0 | 0 | 0 | 1 | 1 |
| Cluster19176 Acidobact Acidobacteria_Gp2 Gp2            | 0 | 0 | 0 | 1 | 0 | 0 | 0 | 0 | 0 | 0 | 0 | 0 | 1 |
| Cluster19177 Proteobac Gammaproteobacteria              | 0 | 1 | 0 | 0 | 0 | 0 | 0 | 0 | 0 | 0 | 0 | 0 | 1 |
| Cluster19179 Proteobac Gamm Xant Sinobac Steroidobacter | 0 | 0 | 0 | 0 | 0 | 0 | 0 | 0 | 0 | 0 | 0 | 1 | 1 |
| Cluster19190 Acidobact Acidobacteria_Gp1                | 0 | 0 | 0 | 0 | 0 | 0 | 0 | 1 | 0 | 0 | 0 | 0 | 1 |



|                                                              |   |   |   |   |   |   |   |   |   |   |   |   |   |
|--------------------------------------------------------------|---|---|---|---|---|---|---|---|---|---|---|---|---|
| Cluster19378 Acidobact Acidobacteria_Gp3                     | 0 | 0 | 0 | 0 | 0 | 0 | 0 | 0 | 0 | 0 | 0 | 1 | 1 |
| Cluster19382 Proteobac Alphap Rhod Acetobacteraceae          | 0 | 0 | 1 | 0 | 0 | 0 | 0 | 0 | 0 | 0 | 0 | 0 | 1 |
| Cluster19383;size=4                                          | 0 | 0 | 0 | 0 | 1 | 0 | 0 | 0 | 0 | 0 | 0 | 0 | 1 |
| Cluster19386 Acidobact Acidobacteria_Gp2 Gp2                 | 0 | 0 | 0 | 1 | 0 | 0 | 0 | 0 | 0 | 0 | 0 | 0 | 1 |
| Cluster19387 Proteobac Gammaproteobacteria                   | 0 | 0 | 0 | 1 | 0 | 0 | 0 | 0 | 0 | 0 | 0 | 0 | 1 |
| Cluster19389 Planctom Planct Planct Planctomycetaceae        | 0 | 0 | 0 | 1 | 0 | 0 | 0 | 0 | 0 | 0 | 0 | 0 | 1 |
| Cluster19394 Acidobact Acidobacteria_Gp1                     | 0 | 0 | 0 | 1 | 0 | 0 | 0 | 0 | 0 | 0 | 0 | 0 | 1 |
| Cluster19399;size=2                                          | 0 | 0 | 0 | 1 | 0 | 0 | 0 | 0 | 0 | 0 | 0 | 0 | 1 |
| Cluster19408 Acidobact Acidobacteria_Gp2 Gp2                 | 1 | 0 | 0 | 0 | 0 | 0 | 0 | 0 | 0 | 0 | 0 | 0 | 1 |
| Cluster19410 Proteobac Alphap Rhizobiales                    | 0 | 0 | 0 | 1 | 0 | 0 | 0 | 0 | 0 | 0 | 0 | 0 | 1 |
| Cluster19411 Proteobac Alphap Rhizc Bradyrh Agromonas        | 0 | 0 | 1 | 0 | 0 | 0 | 0 | 0 | 0 | 0 | 0 | 0 | 1 |
| Cluster19412 Actinobac Actinol Solir Solirubr Solirubrobacte | 0 | 0 | 1 | 0 | 0 | 0 | 0 | 0 | 0 | 0 | 0 | 0 | 1 |
| Cluster19419 Proteobacteria                                  | 0 | 0 | 1 | 0 | 0 | 0 | 0 | 0 | 0 | 0 | 0 | 0 | 1 |
| Cluster19422 Proteobacteria                                  | 0 | 0 | 1 | 0 | 0 | 0 | 0 | 0 | 0 | 0 | 0 | 0 | 1 |
| Cluster19425 Acidobact Acidobacteria_Gp2 Gp2                 | 0 | 0 | 0 | 0 | 0 | 0 | 1 | 0 | 0 | 0 | 0 | 0 | 1 |
| Cluster19426 Proteobac Gammaproteobacteria                   | 1 | 0 | 0 | 0 | 0 | 0 | 0 | 0 | 0 | 0 | 0 | 0 | 1 |
| Cluster19431;size=1                                          | 0 | 0 | 0 | 0 | 0 | 0 | 1 | 0 | 0 | 0 | 0 | 0 | 1 |
| Cluster19434 Proteobac Betaproteobacteria                    | 0 | 0 | 0 | 0 | 0 | 1 | 0 | 0 | 0 | 0 | 0 | 0 | 1 |
| Cluster19442;size=3                                          | 1 | 0 | 0 | 0 | 0 | 0 | 0 | 0 | 0 | 0 | 0 | 0 | 1 |
| Cluster19452 Acidobact Acidobacteria_Gp1                     | 0 | 0 | 0 | 0 | 0 | 0 | 0 | 0 | 0 | 1 | 0 | 0 | 1 |
| Cluster19455 Acidobact Acidobacteria_Gp1 Gp1                 | 0 | 0 | 1 | 0 | 0 | 0 | 0 | 0 | 0 | 0 | 0 | 0 | 1 |
| Cluster19458 Proteobac Alphap Rhod Acetobz Acidisphaera      | 0 | 0 | 0 | 1 | 0 | 0 | 0 | 0 | 0 | 0 | 0 | 0 | 1 |
| Cluster19482 Acidobact Acidobacteria_Gp1 Gp1                 | 0 | 0 | 0 | 0 | 0 | 0 | 0 | 0 | 0 | 0 | 0 | 1 | 1 |
| Cluster19483 Acidobact Acidobacteria_Gp2 Gp2                 | 0 | 0 | 0 | 0 | 1 | 0 | 0 | 0 | 0 | 0 | 0 | 0 | 1 |
| Cluster19491 OD1 OD1_genera_i                                | 0 | 0 | 0 | 1 | 0 | 0 | 0 | 0 | 0 | 0 | 0 | 0 | 1 |
| Cluster19494 Acidobact Acidobacteria_Gp3 Gp3                 | 0 | 0 | 1 | 0 | 0 | 0 | 0 | 0 | 0 | 0 | 0 | 0 | 1 |
| Cluster19507 Acidobact Acidobacteria_Gp2 Gp2                 | 0 | 0 | 0 | 1 | 0 | 0 | 0 | 0 | 0 | 0 | 0 | 0 | 1 |
| Cluster19517 Acidobact Acidobacteria_Gp2 Gp2                 | 0 | 0 | 0 | 1 | 0 | 0 | 0 | 0 | 0 | 0 | 0 | 0 | 1 |
| Cluster19519 Proteobacteria                                  | 0 | 0 | 0 | 0 | 0 | 1 | 0 | 0 | 0 | 0 | 0 | 0 | 1 |





|              |                |                     |             |                   |              |   |   |   |   |   |   |   |   |   |
|--------------|----------------|---------------------|-------------|-------------------|--------------|---|---|---|---|---|---|---|---|---|
| Cluster19911 | Proteobac      | Gammaproteobacteria | 0           | 0                 | 0            | 0 | 0 | 0 | 1 | 0 | 0 | 0 | 0 | 1 |
| Cluster19922 | Acidobact      | Acidobacteria_Gp2   | Gp2         | 0                 | 0            | 0 | 1 | 0 | 0 | 0 | 0 | 0 | 0 | 1 |
| Cluster19928 | Proteobac      | Alphap              | Rhod        | Acetobacteraceae  | 0            | 0 | 1 | 0 | 0 | 0 | 0 | 0 | 0 | 1 |
| Cluster19930 | Proteobac      | Alphap              | Rhizc       | Xanthol           | Pseudolabrys | 0 | 0 | 0 | 0 | 1 | 0 | 0 | 0 | 1 |
| Cluster19936 | Acidobact      | Acidobacteria_Gp3   | 0           | 0                 | 1            | 0 | 0 | 0 | 0 | 0 | 0 | 0 | 0 | 1 |
| Cluster19937 | Proteobac      | Alphap              | Rhizobiales | 0                 | 0            | 0 | 1 | 0 | 0 | 0 | 0 | 0 | 0 | 1 |
| Cluster19938 | Acidobact      | Acidobacteria_Gp1   | Gp1         | 0                 | 0            | 1 | 0 | 0 | 0 | 0 | 0 | 0 | 0 | 1 |
| Cluster19942 | size=1         | 0                   | 0           | 1                 | 0            | 0 | 0 | 0 | 0 | 0 | 0 | 0 | 0 | 1 |
| Cluster19954 | Proteobac      | Alphap              | Rhod        | Acetobacteraceae  | 0            | 0 | 0 | 1 | 0 | 0 | 0 | 0 | 0 | 1 |
| Cluster19956 | Proteobac      | Betaproteobacteria  | 0           | 0                 | 1            | 0 | 0 | 0 | 0 | 0 | 0 | 0 | 0 | 1 |
| Cluster19971 | Acidobact      | Acidobacteria_Gp2   | Gp2         | 0                 | 0            | 0 | 0 | 1 | 0 | 0 | 0 | 0 | 0 | 1 |
| Cluster19974 | Bacteroid      | Sphing              | Sphir       | Sphingo           | Pedobacter   | 0 | 0 | 1 | 0 | 0 | 0 | 0 | 0 | 1 |
| Cluster19978 | size=1         | 0                   | 0           | 1                 | 0            | 0 | 0 | 0 | 0 | 0 | 0 | 0 | 0 | 1 |
| Cluster19979 | Acidobact      | Acidobacteria_Gp2   | Gp2         | 0                 | 0            | 0 | 0 | 0 | 0 | 0 | 0 | 0 | 1 | 1 |
| Cluster19995 | Proteobac      | Deltap              | Myxc        | Polyangiaceae     | 0            | 0 | 1 | 0 | 0 | 0 | 0 | 0 | 0 | 1 |
| Cluster19996 | Proteobac      | Gamm                | Xantl       | Xanthor           | Frateuria    | 0 | 0 | 0 | 0 | 0 | 1 | 0 | 0 | 1 |
| Cluster20009 | Proteobac      | Betapr              | Burkl       | Burkhol           | Burkholderia | 0 | 0 | 1 | 0 | 0 | 0 | 0 | 0 | 1 |
| Cluster20012 | Proteobac      | Alphap              | Rhizc       | Methylocystaceae  | 0            | 0 | 0 | 0 | 0 | 1 | 0 | 0 | 0 | 1 |
| Cluster20015 | Proteobac      | Alphap              | Rhizc       | Bradyrhizobiaceae | 0            | 0 | 1 | 0 | 0 | 0 | 0 | 0 | 0 | 1 |
| Cluster20018 | Proteobacteria | 0                   | 0           | 0                 | 1            | 0 | 0 | 0 | 0 | 0 | 0 | 0 | 0 | 1 |
| Cluster20019 | size=1         | 0                   | 0           | 0                 | 0            | 1 | 0 | 0 | 0 | 0 | 0 | 0 | 0 | 1 |
| Cluster20020 | size=1         | 0                   | 0           | 0                 | 0            | 0 | 0 | 1 | 0 | 0 | 0 | 0 | 0 | 1 |
| Cluster20021 | Proteobacteria | 0                   | 0           | 1                 | 0            | 0 | 0 | 0 | 0 | 0 | 0 | 0 | 0 | 1 |
| Cluster20028 | Chlamydi       | Chlamy              | Chlar       | Parachlamydiaceae | 0            | 0 | 1 | 0 | 0 | 0 | 0 | 0 | 0 | 1 |
| Cluster20030 | Acidobact      | Acidobacteria_Gp1   | 0           | 0                 | 0            | 1 | 0 | 0 | 0 | 0 | 0 | 0 | 0 | 1 |
| Cluster20036 | Proteobac      | Alphap              | Rhod        | Acetob            | Acidisphaera | 0 | 0 | 0 | 0 | 1 | 0 | 0 | 0 | 1 |
| Cluster20039 | Acidobacteria  | 0                   | 0           | 0                 | 1            | 0 | 0 | 0 | 0 | 0 | 0 | 0 | 0 | 1 |
| Cluster20041 | Acidobact      | Acidobacteria_Gp2   | Gp2         | 0                 | 0            | 0 | 0 | 0 | 1 | 0 | 0 | 0 | 0 | 1 |
| Cluster20049 | Acidobact      | Acidobacteria_Gp2   | Gp2         | 0                 | 0            | 0 | 1 | 0 | 0 | 0 | 0 | 0 | 0 | 1 |













|                                                              |   |   |   |   |   |   |   |   |   |   |   |   |   |
|--------------------------------------------------------------|---|---|---|---|---|---|---|---|---|---|---|---|---|
| Cluster20785 Proteobac Deltap Myxococcales                   | 0 | 0 | 0 | 0 | 0 | 0 | 1 | 0 | 0 | 0 | 0 | 0 | 1 |
| Cluster20787 Proteobac Alphap Rhod Acetobacteraceae          | 0 | 0 | 0 | 1 | 0 | 0 | 0 | 0 | 0 | 0 | 0 | 0 | 1 |
| Cluster20788 Proteobac Alphaproteobacteria                   | 0 | 1 | 0 | 0 | 0 | 0 | 0 | 0 | 0 | 0 | 0 | 0 | 1 |
| Cluster20789 Proteobac Alphaproteobacteria                   | 0 | 0 | 0 | 0 | 1 | 0 | 0 | 0 | 0 | 0 | 0 | 0 | 1 |
| Cluster20791;size=1                                          | 0 | 0 | 0 | 1 | 0 | 0 | 0 | 0 | 0 | 0 | 0 | 0 | 1 |
| Cluster20793 Acidobact Acidobacteria_Gp3 Bryobacter          | 0 | 0 | 0 | 0 | 0 | 0 | 1 | 0 | 0 | 0 | 0 | 0 | 1 |
| Cluster20796 Acidobact Acidobacteria_Gp1 Gp1                 | 0 | 0 | 0 | 0 | 0 | 0 | 0 | 0 | 1 | 0 | 0 | 0 | 1 |
| Cluster20799 Acidobact Acidobacteria_Gp3 Gp3                 | 1 | 0 | 0 | 0 | 0 | 0 | 0 | 0 | 0 | 0 | 0 | 0 | 1 |
| Cluster20804 Proteobac Deltaproteobacteria                   | 0 | 1 | 0 | 0 | 0 | 0 | 0 | 0 | 0 | 0 | 0 | 0 | 1 |
| Cluster20806 Proteobac Alphap Rhizobiales                    | 0 | 0 | 0 | 0 | 0 | 0 | 1 | 0 | 0 | 0 | 0 | 0 | 1 |
| Cluster20811 Acidobact Acidobacteria_Gp2 Gp2                 | 0 | 1 | 0 | 0 | 0 | 0 | 0 | 0 | 0 | 0 | 0 | 0 | 1 |
| Cluster20816;size=3                                          | 0 | 0 | 1 | 0 | 0 | 0 | 0 | 0 | 0 | 0 | 0 | 0 | 1 |
| Cluster20819 Actinobac Actinol Acidi Acidimii Aciditerrimona | 0 | 0 | 0 | 0 | 1 | 0 | 0 | 0 | 0 | 0 | 0 | 0 | 1 |
| Cluster20825 Acidobact Acidobacteria_Gp1                     | 0 | 1 | 0 | 0 | 0 | 0 | 0 | 0 | 0 | 0 | 0 | 0 | 1 |
| Cluster20834 Acidobact Acidobacteria_Gp1                     | 0 | 0 | 0 | 0 | 1 | 0 | 0 | 0 | 0 | 0 | 0 | 0 | 1 |
| Cluster20841 Acidobact Acidobacteria_Gp1 Gp1                 | 0 | 0 | 0 | 0 | 1 | 0 | 0 | 0 | 0 | 0 | 0 | 0 | 1 |
| Cluster20843 Bacteroid Sphing Sphir Chitinophagaceae         | 0 | 0 | 0 | 0 | 1 | 0 | 0 | 0 | 0 | 0 | 0 | 0 | 1 |
| Cluster20852 Proteobac Alphap Rhizobiales                    | 0 | 1 | 0 | 0 | 0 | 0 | 0 | 0 | 0 | 0 | 0 | 0 | 1 |
| Cluster20861 Actinobac Actinol Solirubrobacterales           | 0 | 1 | 0 | 0 | 0 | 0 | 0 | 0 | 0 | 0 | 0 | 0 | 1 |
| Cluster20863 Acidobact Acidobacteria_Gp10 Gp10               | 0 | 0 | 0 | 0 | 0 | 0 | 0 | 0 | 0 | 0 | 1 | 0 | 1 |
| Cluster20868 Proteobac Alphap Rhod Acetob: Acidisphaera      | 0 | 0 | 0 | 0 | 1 | 0 | 0 | 0 | 0 | 0 | 0 | 0 | 1 |
| Cluster20878 Proteobac Gammaproteobacteria                   | 0 | 0 | 0 | 0 | 1 | 0 | 0 | 0 | 0 | 0 | 0 | 0 | 1 |
| Cluster20889;size=3                                          | 0 | 1 | 0 | 0 | 0 | 0 | 0 | 0 | 0 | 0 | 0 | 0 | 1 |
| Cluster20892 Acidobact Acidobacteria_Gp3 Gp3                 | 0 | 0 | 0 | 0 | 1 | 0 | 0 | 0 | 0 | 0 | 0 | 0 | 1 |
| Cluster20895 Proteobac Betaproteobacteria                    | 0 | 0 | 0 | 0 | 0 | 0 | 1 | 0 | 0 | 0 | 0 | 0 | 1 |
| Cluster20898 Proteobac Gamm Xantl Sinobac Steroidobacter     | 0 | 0 | 0 | 0 | 1 | 0 | 0 | 0 | 0 | 0 | 0 | 0 | 1 |
| Cluster20903 Acidobact Acidobacteria_Gp3 Gp3                 | 0 | 0 | 0 | 0 | 1 | 0 | 0 | 0 | 0 | 0 | 0 | 0 | 1 |
| Cluster20904 Proteobac Alphap Rhod Acetobacteraceae          | 0 | 0 | 0 | 1 | 0 | 0 | 0 | 0 | 0 | 0 | 0 | 0 | 1 |
| Cluster20907 Actinobac Actinol Acidimicrobiales              | 0 | 0 | 0 | 0 | 0 | 0 | 1 | 0 | 0 | 0 | 0 | 0 | 1 |





|              |                |                     |                               |   |   |   |   |   |   |   |   |   |   |   |   |
|--------------|----------------|---------------------|-------------------------------|---|---|---|---|---|---|---|---|---|---|---|---|
| Cluster21070 | Acidobact      | Acidobacteria_Gp2   | Gp2                           | 0 | 1 | 0 | 0 | 0 | 0 | 0 | 0 | 0 | 0 | 0 | 1 |
| Cluster21071 | Proteobac      | Betapr              | Burkl Oxalobacteraceae        | 1 | 0 | 0 | 0 | 0 | 0 | 0 | 0 | 0 | 0 | 0 | 1 |
| Cluster21074 | Proteobac      | Gammaproteobacteria |                               | 1 | 0 | 0 | 0 | 0 | 0 | 0 | 0 | 0 | 0 | 0 | 1 |
| Cluster21080 | Proteobac      | Deltap              | Myxc Polyangiaceae            | 1 | 0 | 0 | 0 | 0 | 0 | 0 | 0 | 0 | 0 | 0 | 1 |
| Cluster21082 | Proteobac      | Alphap              | Rhodospirillales              | 1 | 0 | 0 | 0 | 0 | 0 | 0 | 0 | 0 | 0 | 0 | 1 |
| Cluster21084 | TM7            |                     | TM7_genera_i                  | 1 | 0 | 0 | 0 | 0 | 0 | 0 | 0 | 0 | 0 | 0 | 1 |
| Cluster21086 | Actinobac      | Actinol             | Actinomycetales               | 0 | 0 | 0 | 0 | 0 | 1 | 0 | 0 | 0 | 0 | 0 | 1 |
| Cluster21090 | Acidobact      | Acidobacteria_Gp3   |                               | 0 | 0 | 0 | 0 | 1 | 0 | 0 | 0 | 0 | 0 | 0 | 1 |
| Cluster21094 | Firmicute      | Bacilli             | Bacill Paeniba Paenibacillus  | 0 | 0 | 0 | 0 | 0 | 0 | 0 | 1 | 0 | 0 | 0 | 1 |
| Cluster21098 | Nitrospira     | Nitros              | Nitro Nitrospi Nitrospira     | 0 | 1 | 0 | 0 | 0 | 0 | 0 | 0 | 0 | 0 | 0 | 1 |
| Cluster21101 | Acidobact      | Acidobacteria_Gp2   | Gp2                           | 0 | 0 | 0 | 0 | 1 | 0 | 0 | 0 | 0 | 0 | 0 | 1 |
| Cluster21102 | Actinobac      | Actinol             | Actin Actinos Actinospica     | 0 | 0 | 0 | 0 | 0 | 0 | 1 | 0 | 0 | 0 | 0 | 1 |
| Cluster21104 | Proteobacteria |                     |                               | 0 | 1 | 0 | 0 | 0 | 0 | 0 | 0 | 0 | 0 | 0 | 1 |
| Cluster21109 | TM7            |                     | TM7_genera_i                  | 0 | 1 | 0 | 0 | 0 | 0 | 0 | 0 | 0 | 0 | 0 | 1 |
| Cluster21117 | Proteobacteria |                     |                               | 0 | 0 | 1 | 0 | 0 | 0 | 0 | 0 | 0 | 0 | 0 | 1 |
| Cluster21126 | Acidobact      | Acidobacteria_Gp3   |                               | 0 | 0 | 0 | 1 | 0 | 0 | 0 | 0 | 0 | 0 | 0 | 1 |
| Cluster21139 | Actinobac      | Actinol             | Actinomycetales               | 0 | 0 | 0 | 0 | 1 | 0 | 0 | 0 | 0 | 0 | 0 | 1 |
| Cluster21150 | Proteobac      | Deltaproteobacteria |                               | 0 | 1 | 0 | 0 | 0 | 0 | 0 | 0 | 0 | 0 | 0 | 1 |
| Cluster21153 | Acidobact      | Acidobacteria_Gp2   | Gp2                           | 0 | 0 | 0 | 0 | 1 | 0 | 0 | 0 | 0 | 0 | 0 | 1 |
| Cluster21155 | ;size=1        |                     |                               | 0 | 1 | 0 | 0 | 0 | 0 | 0 | 0 | 0 | 0 | 0 | 1 |
| Cluster21156 | ;size=3        |                     |                               | 1 | 0 | 0 | 0 | 0 | 0 | 0 | 0 | 0 | 0 | 0 | 1 |
| Cluster21157 | Acidobact      | Acidobacteria_Gp2   | Gp2                           | 0 | 0 | 0 | 0 | 1 | 0 | 0 | 0 | 0 | 0 | 0 | 1 |
| Cluster21158 | Acidobact      | Acidobacteria_Gp2   | Gp2                           | 0 | 0 | 0 | 0 | 1 | 0 | 0 | 0 | 0 | 0 | 0 | 1 |
| Cluster21160 | Proteobac      | Alphap              | Rhodospirillales              | 0 | 0 | 0 | 0 | 0 | 0 | 1 | 0 | 0 | 0 | 0 | 1 |
| Cluster21165 | Acidobact      | Acidobacteria_Gp1   | Granulicella                  | 0 | 0 | 0 | 1 | 0 | 0 | 0 | 0 | 0 | 0 | 0 | 1 |
| Cluster21167 | Proteobacteria |                     |                               | 0 | 1 | 0 | 0 | 0 | 0 | 0 | 0 | 0 | 0 | 0 | 1 |
| Cluster21172 | Proteobac      | Gamm                | Xantl Sinobac Steroidobacter  | 0 | 1 | 0 | 0 | 0 | 0 | 0 | 0 | 0 | 0 | 0 | 1 |
| Cluster21181 | Chlamydi       | Chlamy              | Chlar Parachl: Neochlamydia   | 0 | 0 | 0 | 0 | 1 | 0 | 0 | 0 | 0 | 0 | 0 | 1 |
| Cluster21182 | Actinobac      | Actinol             | Solir Solirubr Solirubrobacte | 0 | 0 | 0 | 0 | 0 | 0 | 1 | 0 | 0 | 0 | 0 | 1 |

|                     |           |                     |                     |                   |                |   |   |   |   |   |   |   |   |   |   |   |   |   |   |
|---------------------|-----------|---------------------|---------------------|-------------------|----------------|---|---|---|---|---|---|---|---|---|---|---|---|---|---|
| Cluster21187        | Actinobac | Actinol             | Soliru              | Solirubr          | Solirubrobacte | 0 | 0 | 0 | 0 | 1 | 0 | 0 | 0 | 0 | 0 | 0 | 0 | 0 | 1 |
| Cluster21192        | Acidobact | Acidobacteria_Gp1   | Edaphobacter        |                   |                | 0 | 0 | 0 | 0 | 1 | 0 | 0 | 0 | 0 | 0 | 0 | 0 | 0 | 1 |
| Cluster21193        | Proteobac | Alphap              | Rhod                | Acetobacteraceae  |                | 0 | 0 | 0 | 0 | 0 | 0 | 1 | 0 | 0 | 0 | 0 | 0 | 0 | 1 |
| Cluster21204        | Actinobac | Actinol             | Acidimicrobiales    |                   |                | 0 | 0 | 0 | 0 | 1 | 0 | 0 | 0 | 0 | 0 | 0 | 0 | 0 | 1 |
| Cluster21210        | Proteobac | Alphap              | Alphaproteok        | Rhizomicrobiu     |                | 0 | 0 | 0 | 1 | 0 | 0 | 0 | 0 | 0 | 0 | 0 | 0 | 0 | 1 |
| Cluster21215        | Acidobact | Acidobacteria_Gp2   | Gp2                 |                   |                | 0 | 1 | 0 | 0 | 0 | 0 | 0 | 0 | 0 | 0 | 0 | 0 | 0 | 1 |
| Cluster21225        | Proteobac | Alphap              | Rhod                | Acetobz           | Acidisphaera   | 0 | 0 | 0 | 0 | 0 | 0 | 1 | 0 | 0 | 0 | 0 | 0 | 0 | 1 |
| Cluster21234        | Verrucom  | Subdivision3        | Subdivision3_ξ      |                   |                | 0 | 0 | 0 | 0 | 1 | 0 | 0 | 0 | 0 | 0 | 0 | 0 | 0 | 1 |
| Cluster21243        | Actinobac | Actinol             | Solirubrobacterales |                   |                | 0 | 0 | 0 | 0 | 0 | 0 | 1 | 0 | 0 | 0 | 0 | 0 | 0 | 1 |
| Cluster21253        | Proteobac | Gammaproteobacteria |                     |                   |                | 0 | 1 | 0 | 0 | 0 | 0 | 0 | 0 | 0 | 0 | 0 | 0 | 0 | 1 |
| Cluster21254        | Proteobac | Gammaproteobacteria |                     |                   |                | 0 | 1 | 0 | 0 | 0 | 0 | 0 | 0 | 0 | 0 | 0 | 0 | 0 | 1 |
| Cluster21255        | Proteobac | Gammaproteobacteria |                     |                   |                | 0 | 0 | 0 | 0 | 0 | 0 | 1 | 0 | 0 | 0 | 0 | 0 | 0 | 1 |
| Cluster21266        | Acidobact | Acidobacteria_Gp2   | Gp2                 |                   |                | 0 | 0 | 0 | 0 | 0 | 0 | 1 | 0 | 0 | 0 | 0 | 0 | 0 | 1 |
| Cluster21270        | Acidobact | Acidobacteria_Gp3   | Gp3                 |                   |                | 0 | 0 | 0 | 0 | 0 | 0 | 1 | 0 | 0 | 0 | 0 | 0 | 0 | 1 |
| Cluster21272        | Acidobact | Acidobacteria_Gp2   | Gp2                 |                   |                | 0 | 0 | 1 | 0 | 0 | 0 | 0 | 0 | 0 | 0 | 0 | 0 | 0 | 1 |
| Cluster21275        | Proteobac | Gamm                | Xantf               | Sinobac           | Steroidobacter | 0 | 0 | 1 | 0 | 0 | 0 | 0 | 0 | 0 | 0 | 0 | 0 | 0 | 1 |
| Cluster21279;size=1 |           |                     |                     |                   |                | 0 | 1 | 0 | 0 | 0 | 0 | 0 | 0 | 0 | 0 | 0 | 0 | 0 | 1 |
| Cluster21282        | Proteobac | Alphap              | Rhizobiales         |                   |                | 0 | 0 | 1 | 0 | 0 | 0 | 0 | 0 | 0 | 0 | 0 | 0 | 0 | 1 |
| Cluster21285        | Acidobact | Acidobacteria_Gp3   | Gp3                 |                   |                | 0 | 0 | 0 | 0 | 0 | 0 | 0 | 0 | 0 | 0 | 0 | 0 | 1 | 1 |
| Cluster21291        | Proteobac | Gamm                | Xantf               | Xanthor           | Frateuria      | 0 | 0 | 0 | 0 | 0 | 0 | 1 | 0 | 0 | 0 | 0 | 0 | 0 | 1 |
| Cluster21313        | Proteobac | Betapr              | Burkholderiales     |                   |                | 0 | 0 | 0 | 1 | 0 | 0 | 0 | 0 | 0 | 0 | 0 | 0 | 0 | 1 |
| Cluster21318        | Proteobac | Alphap              | Rhod                | Acetobacteraceae  |                | 0 | 0 | 0 | 1 | 0 | 0 | 0 | 0 | 0 | 0 | 0 | 0 | 0 | 1 |
| Cluster21322;size=1 |           |                     |                     |                   |                | 0 | 0 | 1 | 0 | 0 | 0 | 0 | 0 | 0 | 0 | 0 | 0 | 0 | 1 |
| Cluster21328        | Proteobac | Alphap              | Rhizc               | Hyphomicrobiaceae |                | 0 | 0 | 0 | 0 | 1 | 0 | 0 | 0 | 0 | 0 | 0 | 0 | 0 | 1 |
| Cluster21336        | Proteobac | Alphap              | Rhod                | Acetobacteraceae  |                | 1 | 0 | 0 | 0 | 0 | 0 | 0 | 0 | 0 | 0 | 0 | 0 | 0 | 1 |
| Cluster21345        | Acidobact | Acidobacteria_Gp10  | Gp10                |                   |                | 0 | 0 | 1 | 0 | 0 | 0 | 0 | 0 | 0 | 0 | 0 | 0 | 0 | 1 |
| Cluster21350        | Acidobact | Acidobacteria_Gp1   | Edaphobacter        |                   |                | 0 | 0 | 1 | 0 | 0 | 0 | 0 | 0 | 0 | 0 | 0 | 0 | 0 | 1 |
| Cluster21361        | Proteobac | Alphap              | Alphaproteok        | Rhizomicrobiu     |                | 0 | 0 | 0 | 1 | 0 | 0 | 0 | 0 | 0 | 0 | 0 | 0 | 0 | 1 |
| Cluster21365        | Verrucom  | Subdivision3        | Subdivision3_ξ      |                   |                | 0 | 0 | 0 | 0 | 0 | 0 | 1 | 0 | 0 | 0 | 0 | 0 | 0 | 1 |



|              |               |                     |                               |   |   |   |   |   |   |   |   |   |   |   |   |
|--------------|---------------|---------------------|-------------------------------|---|---|---|---|---|---|---|---|---|---|---|---|
| Cluster21367 | Acidobact     | Acidobacteria_Gp2   | Gp2                           | 0 | 0 | 0 | 0 | 0 | 0 | 0 | 0 | 1 | 0 | 0 | 1 |
| Cluster21369 | Proteobac     | Gammaproteobacteria |                               | 0 | 0 | 0 | 0 | 0 | 0 | 0 | 0 | 0 | 1 | 0 | 1 |
| Cluster21374 | Proteobac     | Alphaproteobacteria |                               | 0 | 0 | 0 | 0 | 1 | 0 | 0 | 0 | 0 | 0 | 0 | 1 |
| Cluster21388 | Acidobact     | Acidobacteria_Gp1   |                               | 0 | 0 | 0 | 0 | 1 | 0 | 0 | 0 | 0 | 0 | 0 | 1 |
| Cluster21391 | Chlamydi      | Chlamy              | Chlar Parachl: Parachlamydia  | 0 | 1 | 0 | 0 | 0 | 0 | 0 | 0 | 0 | 0 | 0 | 1 |
| Cluster21394 | Acidobact     | Acidobacteria_Gp1   | Gp1                           | 0 | 0 | 0 | 0 | 0 | 0 | 1 | 0 | 0 | 0 | 0 | 1 |
| Cluster21399 | Proteobac     | Alphap              | Rhizc Beijerinckiaaceae       | 0 | 0 | 1 | 0 | 0 | 0 | 0 | 0 | 0 | 0 | 0 | 1 |
| Cluster21408 | Acidobacteria |                     |                               | 0 | 0 | 0 | 0 | 0 | 0 | 0 | 0 | 0 | 0 | 1 | 1 |
| Cluster21410 | Acidobact     | Acidobacteria_Gp2   | Gp2                           | 0 | 0 | 1 | 0 | 0 | 0 | 0 | 0 | 0 | 0 | 0 | 1 |
| Cluster21415 | Verrucom      | Spartobacteria      | Spartobacteria                | 0 | 0 | 0 | 0 | 1 | 0 | 0 | 0 | 0 | 0 | 0 | 1 |
| Cluster21418 | Chlamydi      | Chlamy              | Chlamydiales                  | 0 | 0 | 0 | 0 | 0 | 0 | 0 | 0 | 1 | 0 | 0 | 1 |
| Cluster21421 | Proteobac     | Alphap              | Rhod Acetobacteraceae         | 0 | 0 | 0 | 1 | 0 | 0 | 0 | 0 | 0 | 0 | 0 | 1 |
| Cluster21432 | Elusimicrc    | Elusim              | Elusimic Elusimicrobiun       | 0 | 0 | 0 | 0 | 1 | 0 | 0 | 0 | 0 | 0 | 0 | 1 |
| Cluster21441 | Actinobac     | Actinol             | Solir: Conexib Conexibacter   | 0 | 0 | 0 | 0 | 1 | 0 | 0 | 0 | 0 | 0 | 0 | 1 |
| Cluster21444 | Proteobac     | Alphap              | Alphaproteok Rhizomicrobiu    | 0 | 0 | 0 | 1 | 0 | 0 | 0 | 0 | 0 | 0 | 0 | 1 |
| Cluster21450 | Acidobact     | Acidobacteria_Gp2   | Gp2                           | 0 | 0 | 1 | 0 | 0 | 0 | 0 | 0 | 0 | 0 | 0 | 1 |
| Cluster21456 | Bacteroid     | Sphing              | Sphir Chitino: Sediminibacter | 0 | 0 | 0 | 0 | 0 | 0 | 1 | 0 | 0 | 0 | 0 | 1 |
| Cluster21459 | Proteobac     | Alphap              | Sphir Sphingo Novosphingob    | 0 | 0 | 0 | 0 | 1 | 0 | 0 | 0 | 0 | 0 | 0 | 1 |
| Cluster21461 | Acidobact     | Acidobacteria_Gp6   | Gp6                           | 0 | 0 | 0 | 0 | 1 | 0 | 0 | 0 | 0 | 0 | 0 | 1 |
| Cluster21479 | Proteobac     | Betapr              | Burkholderiales               | 0 | 0 | 0 | 0 | 1 | 0 | 0 | 0 | 0 | 0 | 0 | 1 |
| Cluster21484 | Proteobac     | Alphap              | Caulc Caulob: Caulobacter     | 1 | 0 | 0 | 0 | 0 | 0 | 0 | 0 | 0 | 0 | 0 | 1 |
| Cluster21486 | Acidobact     | Acidobacteria_Gp1   |                               | 0 | 0 | 0 | 0 | 0 | 0 | 1 | 0 | 0 | 0 | 0 | 1 |
| Cluster21494 | Proteobac     | Alphap              | Alphaproteok Rhizomicrobiu    | 0 | 1 | 0 | 0 | 0 | 0 | 0 | 0 | 0 | 0 | 0 | 1 |
| Cluster21497 | Chlamydi      | Chlamy              | Chlar Parachl: Parachlamydia  | 0 | 0 | 0 | 0 | 0 | 1 | 0 | 0 | 0 | 0 | 0 | 1 |
| Cluster21498 | Proteobac     | Deltap              | Myxococcales                  | 0 | 0 | 0 | 0 | 1 | 0 | 0 | 0 | 0 | 0 | 0 | 1 |
| Cluster21500 | Acidobact     | Acidobacteria_Gp2   | Gp2                           | 0 | 0 | 0 | 1 | 0 | 0 | 0 | 0 | 0 | 0 | 0 | 1 |
| Cluster21502 | Acidobact     | Acidobacteria_Gp2   | Gp2                           | 0 | 0 | 0 | 0 | 1 | 0 | 0 | 0 | 0 | 0 | 0 | 1 |
| Cluster21505 | Acidobact     | Acidobacteria_Gp1   | Edaphobacter                  | 0 | 0 | 1 | 0 | 0 | 0 | 0 | 0 | 0 | 0 | 0 | 1 |
| Cluster21511 | Proteobac     | Betapr              | Burkl Oxalob: Undibacterium   | 0 | 0 | 0 | 0 | 1 | 0 | 0 | 0 | 0 | 0 | 0 | 1 |







|                                                           |   |   |   |   |   |   |   |   |   |   |   |   |   |
|-----------------------------------------------------------|---|---|---|---|---|---|---|---|---|---|---|---|---|
| Cluster21908 Proteobac Alphap Alphaproteok Rhizomicrobiu  | 0 | 0 | 0 | 0 | 0 | 0 | 0 | 1 | 0 | 0 | 0 | 0 | 1 |
| Cluster21914 Proteobac Alphap Rhizc Bradyrhizobiaceae     | 0 | 0 | 0 | 0 | 0 | 0 | 0 | 0 | 0 | 0 | 0 | 1 | 1 |
| Cluster21920 Acidobact Acidobacteria_Gp3                  | 0 | 0 | 0 | 1 | 0 | 0 | 0 | 0 | 0 | 0 | 0 | 0 | 1 |
| Cluster21926;size=1                                       | 0 | 0 | 0 | 1 | 0 | 0 | 0 | 0 | 0 | 0 | 0 | 0 | 1 |
| Cluster21929 Acidobact Acidobacteria_Gp2 Gp2              | 0 | 0 | 0 | 0 | 0 | 0 | 1 | 0 | 0 | 0 | 0 | 0 | 1 |
| Cluster21937;size=3                                       | 0 | 0 | 1 | 0 | 0 | 0 | 0 | 0 | 0 | 0 | 0 | 0 | 1 |
| Cluster21938 Actinobac Actinol Solirubrobacterales        | 0 | 0 | 0 | 0 | 0 | 0 | 0 | 0 | 0 | 0 | 1 | 0 | 1 |
| Cluster21940 Actinobac Actinol Acidimicrobiales           | 0 | 0 | 0 | 1 | 0 | 0 | 0 | 0 | 0 | 0 | 0 | 0 | 1 |
| Cluster21944 Acidobact Acidobacteria_Gp2 Gp2              | 0 | 0 | 0 | 1 | 0 | 0 | 0 | 0 | 0 | 0 | 0 | 0 | 1 |
| Cluster21952 Acidobact Acidobacteria_Gp2 Gp2              | 0 | 0 | 1 | 0 | 0 | 0 | 0 | 0 | 0 | 0 | 0 | 0 | 1 |
| Cluster21957 Proteobac Gamm Xantl Sinobac Steroidobacter  | 0 | 0 | 0 | 1 | 0 | 0 | 0 | 0 | 0 | 0 | 0 | 0 | 1 |
| Cluster21960 Proteobac Alphap Rhizc Bradyrhizobiaceae     | 0 | 0 | 0 | 1 | 0 | 0 | 0 | 0 | 0 | 0 | 0 | 0 | 1 |
| Cluster21961 Proteobac Gamm Legio Coxiella Aquicella      | 0 | 0 | 0 | 1 | 0 | 0 | 0 | 0 | 0 | 0 | 0 | 0 | 1 |
| Cluster21964;size=3                                       | 0 | 0 | 0 | 0 | 0 | 0 | 0 | 0 | 0 | 0 | 1 | 0 | 1 |
| Cluster21967 Acidobact Acidobacteria_Gp1 Granulicella     | 0 | 0 | 0 | 1 | 0 | 0 | 0 | 0 | 0 | 0 | 0 | 0 | 1 |
| Cluster21972 Proteobac Alphap Alphaproteok Rhizomicrobiu  | 0 | 0 | 0 | 0 | 0 | 0 | 0 | 0 | 0 | 0 | 1 | 0 | 1 |
| Cluster21974 Actinobac Actinol Solir Conexib Conexibacter | 0 | 0 | 0 | 0 | 0 | 0 | 0 | 0 | 0 | 0 | 1 | 0 | 1 |
| Cluster21978;size=3                                       | 0 | 0 | 0 | 0 | 0 | 0 | 0 | 0 | 0 | 0 | 1 | 0 | 1 |
| Cluster21979 Proteobac Gamm Xantl Sinobac Steroidobacter  | 0 | 0 | 0 | 0 | 0 | 1 | 0 | 0 | 0 | 0 | 0 | 0 | 1 |
| Cluster21980 Bacteroid Bacteroidetes_incert Ohtaekwangia  | 0 | 0 | 0 | 0 | 0 | 0 | 0 | 0 | 0 | 0 | 1 | 0 | 1 |
| Cluster21981 Proteobac Alphap Alphaproteok Rhizomicrobiu  | 0 | 0 | 0 | 0 | 0 | 0 | 0 | 1 | 0 | 0 | 0 | 0 | 1 |
| Cluster21992 Acidobact Acidobacteria_Gp1 Granulicella     | 0 | 0 | 0 | 0 | 0 | 0 | 0 | 1 | 0 | 0 | 0 | 0 | 1 |
| Cluster21997 Proteobac Alphap Rhod Rhodospirillaceae      | 0 | 0 | 0 | 0 | 0 | 0 | 1 | 0 | 0 | 0 | 0 | 0 | 1 |
| Cluster22000 Chlamydi: Chlamy Chlar Parachlamydiaceae     | 0 | 0 | 0 | 1 | 0 | 0 | 0 | 0 | 0 | 0 | 0 | 0 | 1 |
| Cluster22020 Chloroflex Ktedon Ktedon Ktedonobacter       | 0 | 0 | 0 | 1 | 0 | 0 | 0 | 0 | 0 | 0 | 0 | 0 | 1 |
| Cluster22030 Acidobact Acidobacteria_Gp2 Gp2              | 0 | 0 | 0 | 0 | 0 | 0 | 0 | 0 | 0 | 0 | 0 | 1 | 1 |
| Cluster22041 Actinobac Actinol Solir Conexib Conexibacter | 0 | 0 | 0 | 1 | 0 | 0 | 0 | 0 | 0 | 0 | 0 | 0 | 1 |
| Cluster22047 Proteobac Alphaproteobacteria                | 0 | 0 | 0 | 1 | 0 | 0 | 0 | 0 | 0 | 0 | 0 | 0 | 1 |
| Cluster22055 Proteobac Alphap Caulc Cauloba Phenylbacter  | 0 | 0 | 0 | 0 | 0 | 0 | 0 | 0 | 0 | 0 | 1 | 0 | 1 |

|                                                           |   |   |   |   |   |   |   |   |   |   |   |   |   |
|-----------------------------------------------------------|---|---|---|---|---|---|---|---|---|---|---|---|---|
| Cluster22058 Acidobact Acidobacteria_Gp1 Gp1              | 0 | 0 | 0 | 1 | 0 | 0 | 0 | 0 | 0 | 0 | 0 | 0 | 1 |
| Cluster22059 Acidobact Acidobacteria_Gp3 Gp3              | 0 | 0 | 0 | 0 | 0 | 0 | 0 | 0 | 0 | 0 | 1 | 0 | 1 |
| Cluster22075 Acidobact Acidobacteria_Gp3 Gp3              | 0 | 0 | 0 | 0 | 0 | 0 | 0 | 1 | 0 | 0 | 0 | 0 | 1 |
| Cluster22083;size=3                                       | 0 | 0 | 0 | 0 | 0 | 0 | 1 | 0 | 0 | 0 | 0 | 0 | 1 |
| Cluster22084 Chlamydi: Chlamy Chlar Parachlamydiaceae     | 0 | 0 | 0 | 0 | 0 | 1 | 0 | 0 | 0 | 0 | 0 | 0 | 1 |
| Cluster22086 Proteobac Betapr Burk Oxalobz Massilia       | 0 | 0 | 0 | 1 | 0 | 0 | 0 | 0 | 0 | 0 | 0 | 0 | 1 |
| Cluster22087 Verrucom Opitut: Opitu Opituta Opitutus      | 0 | 0 | 0 | 1 | 0 | 0 | 0 | 0 | 0 | 0 | 0 | 0 | 1 |
| Cluster22109;size=1                                       | 0 | 0 | 0 | 1 | 0 | 0 | 0 | 0 | 0 | 0 | 0 | 0 | 1 |
| Cluster22110 Proteobac Alphap Rhod Acetobacteraceae       | 0 | 0 | 0 | 1 | 0 | 0 | 0 | 0 | 0 | 0 | 0 | 0 | 1 |
| Cluster22111 Chlamydi: Chlamy Chlamydiales                | 0 | 0 | 0 | 1 | 0 | 0 | 0 | 0 | 0 | 0 | 0 | 0 | 1 |
| Cluster22113 Proteobac Alphap Alphaproteot Rhizomicrobiu  | 0 | 0 | 0 | 1 | 0 | 0 | 0 | 0 | 0 | 0 | 0 | 0 | 1 |
| Cluster22125 Acidobacteria                                | 0 | 0 | 0 | 0 | 0 | 1 | 0 | 0 | 0 | 0 | 0 | 0 | 1 |
| Cluster22127 Proteobac Gammaproteobacteria                | 0 | 0 | 0 | 1 | 0 | 0 | 0 | 0 | 0 | 0 | 0 | 0 | 1 |
| Cluster22133 Acidobact Holopf Holoj Holoph: Geothrix      | 0 | 1 | 0 | 0 | 0 | 0 | 0 | 0 | 0 | 0 | 0 | 0 | 1 |
| Cluster22140 Acidobact Acidobacteria_Gp2 Gp2              | 0 | 0 | 0 | 0 | 0 | 0 | 0 | 0 | 0 | 0 | 1 | 0 | 1 |
| Cluster22144 Proteobac Betapr Burk Burkholderiaceae       | 0 | 0 | 0 | 1 | 0 | 0 | 0 | 0 | 0 | 0 | 0 | 0 | 1 |
| Cluster22147 Proteobac Alphaproteobacteria                | 0 | 0 | 0 | 1 | 0 | 0 | 0 | 0 | 0 | 0 | 0 | 0 | 1 |
| Cluster22151 Proteobac Gammaproteobacteria                | 0 | 0 | 0 | 1 | 0 | 0 | 0 | 0 | 0 | 0 | 0 | 0 | 1 |
| Cluster22158;size=5                                       | 0 | 0 | 0 | 0 | 0 | 0 | 0 | 0 | 0 | 0 | 0 | 1 | 1 |
| Cluster22159 Proteobac Gamm Legio Coxiellaceae            | 0 | 1 | 0 | 0 | 0 | 0 | 0 | 0 | 0 | 0 | 0 | 0 | 1 |
| Cluster22161 Proteobac Alphap Rhod Acetobacteraceae       | 0 | 0 | 0 | 0 | 0 | 0 | 0 | 0 | 0 | 1 | 0 | 0 | 1 |
| Cluster22181 Acidobact Acidobacteria_Gp3 Gp3              | 0 | 0 | 0 | 0 | 0 | 0 | 1 | 0 | 0 | 0 | 0 | 0 | 1 |
| Cluster22184;size=7                                       | 0 | 0 | 0 | 0 | 0 | 0 | 0 | 0 | 0 | 0 | 0 | 1 | 1 |
| Cluster22188 Acidobacteria                                | 0 | 0 | 1 | 0 | 0 | 0 | 0 | 0 | 0 | 0 | 0 | 0 | 1 |
| Cluster22191 Acidobacteria                                | 0 | 0 | 1 | 0 | 0 | 0 | 0 | 0 | 0 | 0 | 0 | 0 | 1 |
| Cluster22204 Acidobact Acidobacteria_Gp1                  | 0 | 0 | 0 | 1 | 0 | 0 | 0 | 0 | 0 | 0 | 0 | 0 | 1 |
| Cluster22205 Proteobac Alphap Caulc Caulobz Phenylobacter | 0 | 0 | 1 | 0 | 0 | 0 | 0 | 0 | 0 | 0 | 0 | 0 | 1 |
| Cluster22206 Proteobac Alphap Caulc Caulobacteraceae      | 0 | 0 | 0 | 1 | 0 | 0 | 0 | 0 | 0 | 0 | 0 | 0 | 1 |
| Cluster22213 Acidobact Acidobacteria_Gp2 Gp2              | 0 | 0 | 0 | 0 | 0 | 0 | 0 | 0 | 1 | 0 | 0 | 0 | 1 |

|                                                              |   |   |   |   |   |   |   |   |   |   |   |   |   |
|--------------------------------------------------------------|---|---|---|---|---|---|---|---|---|---|---|---|---|
| Cluster22216;size=4                                          | 0 | 0 | 0 | 0 | 0 | 0 | 0 | 1 | 0 | 0 | 0 | 0 | 1 |
| Cluster22221 Proteobac Alphap Rhod Acetobacteraceae          | 0 | 0 | 1 | 0 | 0 | 0 | 0 | 0 | 0 | 0 | 0 | 0 | 1 |
| Cluster22222 Proteobac Betaproteobacteria                    | 0 | 0 | 1 | 0 | 0 | 0 | 0 | 0 | 0 | 0 | 0 | 0 | 1 |
| Cluster22225 Proteobac Alphaproteobacteria                   | 0 | 0 | 0 | 0 | 0 | 0 | 0 | 0 | 0 | 0 | 0 | 1 | 1 |
| Cluster22237 Acidobact Acidobacteria_Gp1 Gp1                 | 0 | 1 | 0 | 0 | 0 | 0 | 0 | 0 | 0 | 0 | 0 | 0 | 1 |
| Cluster22241 Proteobac Betapr Burkl Burkholderiaceae         | 0 | 0 | 0 | 0 | 0 | 0 | 0 | 0 | 0 | 0 | 0 | 1 | 1 |
| Cluster22242 Proteobac Gammaproteobacteria                   | 0 | 0 | 0 | 0 | 0 | 0 | 0 | 0 | 0 | 0 | 0 | 1 | 1 |
| Cluster22245 Nitrospira Nitrosq Nitro Nitrospi Nitrospira    | 0 | 1 | 0 | 0 | 0 | 0 | 0 | 0 | 0 | 0 | 0 | 0 | 1 |
| Cluster22246;size=7                                          | 0 | 0 | 0 | 0 | 0 | 0 | 0 | 1 | 0 | 0 | 0 | 0 | 1 |
| Cluster22252 Acidobact Acidobacteria_Gp2 Gp2                 | 0 | 0 | 0 | 0 | 0 | 0 | 0 | 0 | 0 | 0 | 0 | 1 | 1 |
| Cluster22261 Acidobact Acidobacteria_Gp2 Gp2                 | 0 | 0 | 0 | 1 | 0 | 0 | 0 | 0 | 0 | 0 | 0 | 0 | 1 |
| Cluster22270 Acidobact Acidobacteria_Gp1                     | 0 | 0 | 1 | 0 | 0 | 0 | 0 | 0 | 0 | 0 | 0 | 0 | 1 |
| Cluster22272 Proteobac Betapr Burkl Burkhol Paucimonas       | 0 | 0 | 0 | 0 | 0 | 1 | 0 | 0 | 0 | 0 | 0 | 0 | 1 |
| Cluster22273 Acidobact Acidobacteria_Gp1                     | 0 | 0 | 1 | 0 | 0 | 0 | 0 | 0 | 0 | 0 | 0 | 0 | 1 |
| Cluster22278 Proteobac Alphap Rhodospirillales               | 0 | 0 | 0 | 0 | 1 | 0 | 0 | 0 | 0 | 0 | 0 | 0 | 1 |
| Cluster22279;size=2                                          | 0 | 0 | 0 | 0 | 0 | 0 | 0 | 0 | 0 | 0 | 0 | 1 | 1 |
| Cluster22281 Proteobac Alphap Rhod Acetobacteraceae          | 0 | 0 | 1 | 0 | 0 | 0 | 0 | 0 | 0 | 0 | 0 | 0 | 1 |
| Cluster22282 Proteobac Alphap Rhizobiales                    | 0 | 0 | 0 | 0 | 0 | 0 | 0 | 0 | 0 | 0 | 0 | 1 | 1 |
| Cluster22286 Acidobact Acidobacteria_Gp1 Gp1                 | 0 | 0 | 1 | 0 | 0 | 0 | 0 | 0 | 0 | 0 | 0 | 0 | 1 |
| Cluster22287 Acidobact Acidobacteria_Gp3 Bryobacter          | 0 | 0 | 0 | 1 | 0 | 0 | 0 | 0 | 0 | 0 | 0 | 0 | 1 |
| Cluster22296 Acidobact Acidobacteria_Gp1                     | 0 | 0 | 0 | 0 | 0 | 0 | 0 | 0 | 1 | 0 | 0 | 0 | 1 |
| Cluster22301;size=1                                          | 0 | 0 | 1 | 0 | 0 | 0 | 0 | 0 | 0 | 0 | 0 | 0 | 1 |
| Cluster22304;size=3                                          | 0 | 0 | 0 | 0 | 0 | 0 | 0 | 0 | 0 | 0 | 0 | 1 | 1 |
| Cluster22305 Acidobact Acidobacteria_Gp2 Gp2                 | 0 | 0 | 1 | 0 | 0 | 0 | 0 | 0 | 0 | 0 | 0 | 0 | 1 |
| Cluster22309 Acidobact Acidobacteria_Gp2 Gp2                 | 0 | 0 | 0 | 0 | 0 | 0 | 1 | 0 | 0 | 0 | 0 | 0 | 1 |
| Cluster22312 Proteobac Alphap Rhizc Bradyrhizobiaceae        | 0 | 0 | 0 | 0 | 0 | 0 | 0 | 0 | 0 | 0 | 0 | 1 | 1 |
| Cluster22315 Actinobac Actinol Acidi Acidimii Aciditerrimona | 0 | 1 | 0 | 0 | 0 | 0 | 0 | 0 | 0 | 0 | 0 | 0 | 1 |
| Cluster22318 Proteobac Betapr Burkl Burkhol Burkholderia     | 0 | 0 | 0 | 0 | 0 | 0 | 0 | 0 | 0 | 0 | 0 | 1 | 1 |
| Cluster22322 Acidobact Acidobacteria_Gp1                     | 0 | 0 | 0 | 0 | 0 | 0 | 1 | 0 | 0 | 0 | 0 | 0 | 1 |











|              |               |                     |                   |   |   |   |   |   |   |   |   |   |   |   |
|--------------|---------------|---------------------|-------------------|---|---|---|---|---|---|---|---|---|---|---|
| Cluster22790 | Acidobact     | Acidobacteria_Gp2   | Gp2               | 0 | 0 | 0 | 0 | 0 | 0 | 1 | 0 | 0 | 0 | 1 |
| Cluster22795 | Proteobac     | Alphap Rhod         | Rhodospirillaceae | 0 | 0 | 1 | 0 | 0 | 0 | 0 | 0 | 0 | 0 | 1 |
| Cluster22805 | Acidobact     | Acidobacteria_Gp6   | Gp6               | 0 | 0 | 1 | 0 | 0 | 0 | 0 | 0 | 0 | 0 | 1 |
| Cluster22817 | Acidobact     | Acidobacteria_Gp2   | Gp2               | 0 | 0 | 0 | 0 | 0 | 0 | 0 | 0 | 1 | 0 | 1 |
| Cluster22820 | Proteobac     | Alphap Rhod         | Acetobacteraceae  | 0 | 0 | 1 | 0 | 0 | 0 | 0 | 0 | 0 | 0 | 1 |
| Cluster22823 | Acidobact     | Acidobacteria_Gp1   |                   | 0 | 0 | 1 | 0 | 0 | 0 | 0 | 0 | 0 | 0 | 1 |
| Cluster22824 | Proteobac     | Betapr              | Burkholderiales   | 0 | 0 | 1 | 0 | 0 | 0 | 0 | 0 | 0 | 0 | 1 |
| Cluster22830 | Proteobac     | Alphap Caulc        | Caulobacteraceae  | 0 | 0 | 0 | 0 | 0 | 0 | 0 | 0 | 1 | 0 | 1 |
| Cluster22835 | Proteobac     | Gamm Xantf          | Sinobacteraceae   | 0 | 0 | 0 | 0 | 0 | 0 | 0 | 0 | 1 | 0 | 1 |
| Cluster22836 | Proteobac     | Alphap Rhod         | Acetobacteraceae  | 0 | 0 | 1 | 0 | 0 | 0 | 0 | 0 | 0 | 0 | 1 |
| Cluster22838 | Proteobac     | Alphap Caulc        | Caulobacteraceae  | 0 | 0 | 0 | 0 | 0 | 0 | 0 | 0 | 0 | 1 | 1 |
| Cluster22839 | Chlamydi      | Chlamy              | Chlamydiales      | 0 | 0 | 1 | 0 | 0 | 0 | 0 | 0 | 0 | 0 | 1 |
| Cluster22841 | ;size=1       |                     |                   | 0 | 0 | 1 | 0 | 0 | 0 | 0 | 0 | 0 | 0 | 1 |
| Cluster22850 | Proteobac     | Alphaproteobacteria |                   | 0 | 0 | 1 | 0 | 0 | 0 | 0 | 0 | 0 | 0 | 1 |
| Cluster22852 | Proteobac     | Alphap Rhod         | Acetobacteraceae  | 0 | 0 | 1 | 0 | 0 | 0 | 0 | 0 | 0 | 0 | 1 |
| Cluster22857 | Acidobact     | Acidobacteria_Gp2   | Gp2               | 0 | 0 | 0 | 0 | 0 | 0 | 0 | 0 | 0 | 1 | 1 |
| Cluster22858 | Actinobac     | Actinobacteria      |                   | 0 | 0 | 0 | 0 | 0 | 0 | 0 | 0 | 0 | 1 | 1 |
| Cluster22879 | Acidobact     | Acidobacteria_Gp1   | Gp1               | 0 | 0 | 0 | 0 | 0 | 0 | 0 | 0 | 0 | 1 | 1 |
| Cluster22887 | Acidobact     | Acidobacteria_Gp3   |                   | 0 | 0 | 0 | 1 | 0 | 0 | 0 | 0 | 0 | 0 | 1 |
| Cluster22893 | Acidobact     | Acidobacteria_Gp1   |                   | 0 | 0 | 0 | 0 | 0 | 0 | 0 | 0 | 0 | 1 | 1 |
| Cluster22894 | Acidobact     | Acidobacteria_Gp2   | Gp2               | 0 | 0 | 0 | 1 | 0 | 0 | 0 | 0 | 0 | 0 | 1 |
| Cluster22896 | Proteobac     | Alphap Rhizobiales  |                   | 0 | 0 | 0 | 0 | 0 | 0 | 0 | 0 | 1 | 0 | 1 |
| Cluster22901 | Bacteroidetes |                     |                   | 0 | 0 | 0 | 0 | 0 | 0 | 0 | 0 | 0 | 1 | 1 |
| Cluster22903 | Proteobac     | Betaproteobacteria  |                   | 0 | 0 | 0 | 1 | 0 | 0 | 0 | 0 | 0 | 0 | 1 |
| Cluster22913 | Acidobact     | Acidobacteria_Gp1   |                   | 0 | 0 | 0 | 0 | 0 | 0 | 1 | 0 | 0 | 0 | 1 |
| Cluster22914 | Acidobact     | Acidobacteria_Gp2   | Gp2               | 0 | 0 | 0 | 0 | 0 | 0 | 1 | 0 | 0 | 0 | 1 |
| Cluster22915 | Chlamydi      | Chlamy              | Chlamydiales      | 0 | 0 | 0 | 0 | 0 | 0 | 0 | 1 | 0 | 0 | 1 |
| Cluster22916 | Acidobact     | Acidobacteria_Gp1   | Gp1               | 0 | 0 | 1 | 0 | 0 | 0 | 0 | 0 | 0 | 0 | 1 |
| Cluster22921 | Acidobact     | Acidobacteria_Gp2   | Gp2               | 0 | 0 | 0 | 1 | 0 | 0 | 0 | 0 | 0 | 0 | 1 |





|                                                             |   |   |   |   |   |   |   |   |   |   |   |   |   |
|-------------------------------------------------------------|---|---|---|---|---|---|---|---|---|---|---|---|---|
| Cluster23208 Chlamydi: Chlamy Chlar Parachlamydia           | 0 | 0 | 1 | 0 | 0 | 0 | 0 | 0 | 0 | 0 | 0 | 0 | 1 |
| Cluster23217 Proteobac Deltaproteobacteria                  | 0 | 0 | 0 | 0 | 0 | 0 | 0 | 0 | 0 | 0 | 1 | 0 | 1 |
| Cluster23225 Actinobac Actinobacteria                       | 0 | 0 | 1 | 0 | 0 | 0 | 0 | 0 | 0 | 0 | 0 | 0 | 1 |
| Cluster23228 Actinobac Actinol Solirul Conexib Conexibacter | 0 | 0 | 0 | 0 | 0 | 0 | 0 | 0 | 0 | 0 | 1 | 0 | 1 |
| Cluster23232 Acidobact Acidobacteria_Gp3 Bryobacter         | 0 | 0 | 1 | 0 | 0 | 0 | 0 | 0 | 0 | 0 | 0 | 0 | 1 |
| Cluster23233 Proteobac Gammaproteobacteria                  | 0 | 0 | 1 | 0 | 0 | 0 | 0 | 0 | 0 | 0 | 0 | 0 | 1 |
| Cluster23240 Proteobac Alphap Rhizoc Methylc Methylocystis  | 0 | 0 | 0 | 0 | 0 | 0 | 0 | 0 | 0 | 0 | 1 | 0 | 1 |
| Cluster23258 Acidobact Acidobacteria_Gp3 Gp3                | 0 | 0 | 0 | 0 | 0 | 0 | 1 | 0 | 0 | 0 | 0 | 0 | 1 |
| Cluster23261 Proteobac Gammaproteobacteria                  | 0 | 0 | 0 | 0 | 0 | 0 | 0 | 0 | 0 | 0 | 0 | 1 | 1 |
| Cluster23264 Actinobac Actinol Acidimicrobiales             | 0 | 0 | 1 | 0 | 0 | 0 | 0 | 0 | 0 | 0 | 0 | 0 | 1 |
| Cluster23266 Proteobacteria                                 | 0 | 0 | 0 | 0 | 0 | 1 | 0 | 0 | 0 | 0 | 0 | 0 | 1 |
| Cluster23279 Acidobact Acidobacteria_Gp3                    | 0 | 0 | 1 | 0 | 0 | 0 | 0 | 0 | 0 | 0 | 0 | 0 | 1 |
| Cluster23287 Acidobact Acidobacteria_Gp2 Gp2                | 0 | 0 | 1 | 0 | 0 | 0 | 0 | 0 | 0 | 0 | 0 | 0 | 1 |
| Cluster23289 Proteobac Gammaproteobacteria                  | 0 | 0 | 1 | 0 | 0 | 0 | 0 | 0 | 0 | 0 | 0 | 0 | 1 |
| Cluster23290;size=2                                         | 0 | 0 | 0 | 0 | 0 | 0 | 0 | 0 | 0 | 0 | 1 | 0 | 1 |
| Cluster23293 Chlamydi: Chlamy Chlar Parachlamydiaceae       | 0 | 0 | 0 | 0 | 0 | 0 | 1 | 0 | 0 | 0 | 0 | 0 | 1 |
| Cluster23304 Verrucom Opitut: Opitu Opituta Opitutus        | 0 | 0 | 0 | 0 | 0 | 0 | 0 | 0 | 1 | 0 | 0 | 0 | 1 |
| Cluster23314;size=4                                         | 0 | 0 | 0 | 0 | 0 | 0 | 0 | 1 | 0 | 0 | 0 | 0 | 1 |
| Cluster23317 Acidobacteria                                  | 0 | 0 | 0 | 0 | 1 | 0 | 0 | 0 | 0 | 0 | 0 | 0 | 1 |
| Cluster23319 Chlamydi: Chlamy Chlar Parachlamydiaceae       | 0 | 0 | 0 | 0 | 1 | 0 | 0 | 0 | 0 | 0 | 0 | 0 | 1 |
| Cluster23325 Proteobac Gammaproteobacteria                  | 0 | 0 | 0 | 0 | 0 | 0 | 1 | 0 | 0 | 0 | 0 | 0 | 1 |
| Cluster23330;size=19                                        | 0 | 0 | 0 | 0 | 0 | 0 | 1 | 0 | 0 | 0 | 0 | 0 | 1 |
| Cluster23332 Proteobac Gamm Xantl Sinobac Steroidobacter    | 0 | 0 | 0 | 0 | 0 | 1 | 0 | 0 | 0 | 0 | 0 | 0 | 1 |
| Cluster23334 Bacteroid Sphing Sphir Chitinophagaceae        | 0 | 0 | 0 | 0 | 0 | 1 | 0 | 0 | 0 | 0 | 0 | 0 | 1 |
| Cluster23337 Actinobac Actinol Actin Actinosj Actinospica   | 0 | 0 | 0 | 0 | 1 | 0 | 0 | 0 | 0 | 0 | 0 | 0 | 1 |
| Cluster23338 Acidobact Acidobacteria_Gp3 Gp3                | 0 | 0 | 0 | 0 | 0 | 1 | 0 | 0 | 0 | 0 | 0 | 0 | 1 |
| Cluster23339 Planctom Planct Planct Plancto Zavarzinella    | 0 | 0 | 0 | 0 | 0 | 0 | 1 | 0 | 0 | 0 | 0 | 0 | 1 |
| Cluster23340 Acidobact Acidobacteria_Gp3 Gp3                | 0 | 0 | 0 | 0 | 0 | 1 | 0 | 0 | 0 | 0 | 0 | 0 | 1 |
| Cluster23353 Chlamydi: Chlamy Chlar Parachlamydiaceae       | 0 | 0 | 0 | 0 | 0 | 0 | 0 | 0 | 1 | 0 | 0 | 0 | 1 |

|                     |               |                     |                   |                   |               |   |   |   |   |   |   |   |   |   |
|---------------------|---------------|---------------------|-------------------|-------------------|---------------|---|---|---|---|---|---|---|---|---|
| Cluster23356        | Proteobac     | Gammaproteobacteria | 0                 | 0                 | 0             | 0 | 0 | 1 | 0 | 0 | 0 | 0 | 0 | 1 |
| Cluster23365        | Acidobact     | Acidobacteria_Gp3   | Gp3               | 0                 | 0             | 0 | 0 | 1 | 0 | 0 | 0 | 0 | 0 | 1 |
| Cluster23367        | Proteobac     | Alphap              | Caulc             | Cauloba           | Caulobacter   | 0 | 0 | 0 | 1 | 0 | 0 | 0 | 0 | 1 |
| Cluster23371        | Proteobac     | Gammaproteobacteria | 0                 | 0                 | 0             | 0 | 0 | 0 | 0 | 0 | 0 | 0 | 1 | 1 |
| Cluster23375        | Planctom      | Planct              | Planc             | Plancto           | Planctomyces  | 0 | 0 | 0 | 0 | 0 | 1 | 0 | 0 | 1 |
| Cluster23388        | Chlamydi      | Chlamy              | Chlar             | Parachl           | Parachlamydia | 0 | 0 | 0 | 0 | 0 | 1 | 0 | 0 | 1 |
| Cluster23390        | Verrucom      | Opitut              | Opitu             | Opituta           | Opitutus      | 1 | 0 | 0 | 0 | 0 | 0 | 0 | 0 | 1 |
| Cluster23393        | Actinobac     | Actinol             | Solirt            | Conexib           | Conexibacter  | 0 | 0 | 0 | 1 | 0 | 0 | 0 | 0 | 1 |
| Cluster23395        | Acidobact     | Acidobacteria_Gp6   | Gp6               | 0                 | 0             | 0 | 0 | 0 | 0 | 1 | 0 | 0 | 0 | 1 |
| Cluster23398        | Acidobacteria | 0                   | 0                 | 0                 | 0             | 0 | 0 | 0 | 1 | 0 | 0 | 0 | 0 | 1 |
| Cluster23400        | Proteobac     | Alphap              | Caulc             | Caulobacteraceae  | 0             | 0 | 0 | 0 | 0 | 1 | 0 | 0 | 0 | 1 |
| Cluster23402        | Acidobacteria | 0                   | 0                 | 0                 | 0             | 0 | 0 | 0 | 0 | 1 | 0 | 0 | 0 | 1 |
| Cluster23403        | Bacteroid     | Sphing              | Sphir             | Chitinophagaceae  | 0             | 0 | 0 | 0 | 0 | 0 | 1 | 0 | 0 | 1 |
| Cluster23404        | Acidobact     | Acidobacteria_Gp2   | Gp2               | 0                 | 0             | 0 | 0 | 0 | 0 | 0 | 1 | 0 | 0 | 1 |
| Cluster23407        | Proteobac     | Betapr              | Burkl             | Burkhol           | Burkholderia  | 0 | 0 | 0 | 0 | 0 | 1 | 0 | 0 | 1 |
| Cluster23411        | Chlamydi      | Chlamy              | Chlar             | Parachlamydiaceae | 0             | 0 | 0 | 0 | 0 | 0 | 1 | 0 | 0 | 1 |
| Cluster23416        | Chlamydi      | Chlamy              | Chlar             | Parachl           | Parachlamydia | 0 | 0 | 0 | 0 | 0 | 0 | 1 | 0 | 1 |
| Cluster23422        | Chlamydi      | Chlamy              | Chlar             | Parachl           | Neochlamydia  | 0 | 0 | 0 | 0 | 0 | 0 | 1 | 0 | 1 |
| Cluster23433        | Chloroflex    | Ktedor              | Ktedonobacterales | 0                 | 0             | 0 | 0 | 0 | 1 | 0 | 0 | 0 | 0 | 1 |
| Cluster23436        | Acidobact     | Acidobacteria_Gp2   | Gp2               | 0                 | 0             | 0 | 1 | 0 | 0 | 0 | 0 | 0 | 0 | 1 |
| Cluster23446        | Proteobac     | Deltap              | Myxococcales      | 0                 | 0             | 0 | 0 | 0 | 0 | 0 | 0 | 1 | 0 | 1 |
| Cluster23453        | Acidobact     | Acidobacteria_Gp1   | Gp1               | 0                 | 0             | 0 | 0 | 0 | 0 | 1 | 0 | 0 | 0 | 1 |
| Cluster23457        | Acidobacteria | 0                   | 0                 | 0                 | 0             | 0 | 0 | 0 | 0 | 1 | 0 | 0 | 0 | 1 |
| Cluster23458        | Actinobac     | Actinol             | Solirt            | Conexib           | Conexibacter  | 0 | 0 | 0 | 0 | 0 | 1 | 0 | 0 | 1 |
| Cluster23464;size=1 | 0             | 0                   | 0                 | 0                 | 0             | 0 | 0 | 0 | 0 | 0 | 1 | 0 | 0 | 1 |
| Cluster23468        | Acidobact     | Acidobacteria_Gp2   | Gp2               | 0                 | 0             | 0 | 0 | 0 | 0 | 0 | 0 | 1 | 0 | 1 |
| Cluster23471        | Proteobac     | Alphap              | Rhizc             | Methylocystaceae  | 0             | 0 | 0 | 0 | 0 | 0 | 0 | 1 | 0 | 1 |
| Cluster23480        | Actinobac     | Actinol             | Actinomycetales   | 0                 | 0             | 0 | 0 | 0 | 1 | 0 | 0 | 0 | 0 | 1 |
| Cluster23481        | Proteobac     | Alphap              | Rhizobiales       | 0                 | 0             | 0 | 0 | 0 | 1 | 0 | 0 | 0 | 0 | 1 |



|                                                            |   |   |   |   |   |   |   |   |   |   |   |   |   |
|------------------------------------------------------------|---|---|---|---|---|---|---|---|---|---|---|---|---|
| Cluster23482;size=2                                        | 0 | 0 | 0 | 0 | 1 | 0 | 0 | 0 | 0 | 0 | 0 | 0 | 1 |
| Cluster23483 Acidobact Acidobacteria_Gp2 Gp2               | 0 | 0 | 0 | 0 | 0 | 0 | 0 | 0 | 1 | 0 | 0 | 0 | 1 |
| Cluster23493 Proteobacteria                                | 0 | 0 | 0 | 0 | 0 | 0 | 1 | 0 | 0 | 0 | 0 | 0 | 1 |
| Cluster23494 Acidobact Acidobacteria_Gp2 Gp2               | 0 | 0 | 0 | 0 | 0 | 1 | 0 | 0 | 0 | 0 | 0 | 0 | 1 |
| Cluster23498 Chlamydi: Chlamy Chlamydiales                 | 0 | 0 | 0 | 0 | 0 | 0 | 0 | 0 | 0 | 1 | 0 | 0 | 1 |
| Cluster23499 Proteobac Gammaproteobacteria                 | 0 | 0 | 0 | 0 | 0 | 0 | 1 | 0 | 0 | 0 | 0 | 0 | 1 |
| Cluster23506;size=1                                        | 0 | 0 | 0 | 0 | 0 | 1 | 0 | 0 | 0 | 0 | 0 | 0 | 1 |
| Cluster23512 Acidobact Acidobacteria_Gp3 Gp3               | 0 | 0 | 0 | 0 | 0 | 0 | 1 | 0 | 0 | 0 | 0 | 0 | 1 |
| Cluster23513 Proteobac Gamm Xantl Sinobac Steroidobacter   | 0 | 0 | 0 | 0 | 0 | 1 | 0 | 0 | 0 | 0 | 0 | 0 | 1 |
| Cluster23520;size=3                                        | 0 | 0 | 0 | 0 | 0 | 1 | 0 | 0 | 0 | 0 | 0 | 0 | 1 |
| Cluster23537 Verrucom Opitut: Opitu Opituta Opitutus       | 0 | 0 | 0 | 0 | 0 | 1 | 0 | 0 | 0 | 0 | 0 | 0 | 1 |
| Cluster23543 Acidobact Acidobacteria_Gp1                   | 0 | 0 | 0 | 0 | 0 | 0 | 0 | 0 | 1 | 0 | 0 | 0 | 1 |
| Cluster23545 Proteobac Deltaproteobacteria                 | 0 | 0 | 0 | 0 | 0 | 0 | 1 | 0 | 0 | 0 | 0 | 0 | 1 |
| Cluster23548 Acidobact Acidobacteria_Gp3                   | 0 | 0 | 0 | 0 | 0 | 1 | 0 | 0 | 0 | 0 | 0 | 0 | 1 |
| Cluster23550 Proteobac Alphap Sphingomonadales             | 0 | 0 | 0 | 0 | 0 | 1 | 0 | 0 | 0 | 0 | 0 | 0 | 1 |
| Cluster23556 Proteobac Alphap Caulc Cauloba: Phenylobacter | 0 | 0 | 0 | 0 | 0 | 0 | 0 | 1 | 0 | 0 | 0 | 0 | 1 |
| Cluster23559 Proteobac Betaproteobacteria                  | 0 | 0 | 0 | 0 | 0 | 0 | 1 | 0 | 0 | 0 | 0 | 0 | 1 |
| Cluster23563 Acidobact Acidobacteria_Gp3 Gp3               | 0 | 0 | 0 | 0 | 0 | 1 | 0 | 0 | 0 | 0 | 0 | 0 | 1 |
| Cluster23565 Chlamydi: Chlamy Chlamydiales                 | 0 | 0 | 0 | 0 | 0 | 1 | 0 | 0 | 0 | 0 | 0 | 0 | 1 |
| Cluster23568 Proteobac Alphap Rhodospirillales             | 0 | 0 | 0 | 0 | 0 | 0 | 1 | 0 | 0 | 0 | 0 | 0 | 1 |
| Cluster23569 Chlamydi: Chlamy Chlamydiales                 | 0 | 0 | 0 | 0 | 0 | 0 | 0 | 0 | 1 | 0 | 0 | 0 | 1 |
| Cluster23573 Acidobact Acidobacteria_Gp3 Gp3               | 0 | 0 | 0 | 0 | 1 | 0 | 0 | 0 | 0 | 0 | 0 | 0 | 1 |
| Cluster23575 Proteobac Alphap Caulc Caulobacteraceae       | 0 | 0 | 0 | 0 | 1 | 0 | 0 | 0 | 0 | 0 | 0 | 0 | 1 |
| Cluster23576 Chlamydi: Chlamy Chlar Parachlamydiaceae      | 0 | 0 | 0 | 0 | 0 | 0 | 0 | 0 | 1 | 0 | 0 | 0 | 1 |
| Cluster23578 Proteobac Alphap Alphaproteok Rhizomicrobiu   | 0 | 0 | 0 | 0 | 0 | 0 | 0 | 1 | 0 | 0 | 0 | 0 | 1 |
| Cluster23579 Armatimc Chthor Chtho Chthono: Chthonomona:   | 0 | 0 | 0 | 0 | 0 | 0 | 0 | 0 | 1 | 0 | 0 | 0 | 1 |
| Cluster23582 Gemmatir Gemm Gemı Gemma Gemmatimona:         | 0 | 0 | 0 | 0 | 0 | 1 | 0 | 0 | 0 | 0 | 0 | 0 | 1 |
| Cluster23587 Acidobact Acidobacteria_Gp3                   | 0 | 0 | 0 | 0 | 0 | 1 | 0 | 0 | 0 | 0 | 0 | 0 | 1 |
| Cluster23594 Proteobac Alphap Rhizc Bradyrh Nitrobacter    | 0 | 0 | 0 | 0 | 0 | 0 | 1 | 0 | 0 | 0 | 0 | 0 | 1 |

|                                                          |   |   |   |   |   |   |   |   |   |   |   |   |   |
|----------------------------------------------------------|---|---|---|---|---|---|---|---|---|---|---|---|---|
| Cluster23598;size=3                                      | 0 | 0 | 0 | 0 | 0 | 1 | 0 | 0 | 0 | 0 | 0 | 0 | 1 |
| Cluster23603 Proteobac Gammaproteobacteria               | 0 | 0 | 0 | 0 | 0 | 1 | 0 | 0 | 0 | 0 | 0 | 0 | 1 |
| Cluster23608 Acidobact Acidobacteria_Gp1 Gp1             | 0 | 0 | 0 | 0 | 0 | 0 | 0 | 1 | 0 | 0 | 0 | 0 | 1 |
| Cluster23615;size=2                                      | 0 | 0 | 0 | 0 | 0 | 0 | 0 | 1 | 0 | 0 | 0 | 0 | 1 |
| Cluster23619 Proteobacteria                              | 0 | 0 | 0 | 0 | 0 | 0 | 0 | 1 | 0 | 0 | 0 | 0 | 1 |
| Cluster23627 Acidobact Acidobacteria_Gp2 Gp2             | 0 | 0 | 0 | 0 | 0 | 0 | 0 | 1 | 0 | 0 | 0 | 0 | 1 |
| Cluster23629 Proteobac Alphap Rhodospirillales           | 0 | 0 | 0 | 0 | 0 | 1 | 0 | 0 | 0 | 0 | 0 | 0 | 1 |
| Cluster23630 Proteobac Gamm Pseu Pseudo Rhizobacter      | 0 | 0 | 0 | 0 | 0 | 0 | 0 | 1 | 0 | 0 | 0 | 0 | 1 |
| Cluster23631 Proteobacteria                              | 0 | 0 | 0 | 0 | 0 | 0 | 1 | 0 | 0 | 0 | 0 | 0 | 1 |
| Cluster23643 Chlamydi Chlam Chlar Parachlamydiaceae      | 0 | 0 | 0 | 0 | 0 | 0 | 1 | 0 | 0 | 0 | 0 | 0 | 1 |
| Cluster23645 Acidobact Acidobacteria_Gp1 Gp1             | 0 | 0 | 0 | 0 | 0 | 1 | 0 | 0 | 0 | 0 | 0 | 0 | 1 |
| Cluster23665 Acidobact Acidobacteria_Gp1 Gp1             | 0 | 0 | 0 | 0 | 1 | 0 | 0 | 0 | 0 | 0 | 0 | 0 | 1 |
| Cluster23682 Proteobac Gamm Legio Coxiella Aquicella     | 0 | 0 | 0 | 0 | 0 | 1 | 0 | 0 | 0 | 0 | 0 | 0 | 1 |
| Cluster23683 Actinobac Actinobacteria                    | 0 | 0 | 0 | 0 | 0 | 1 | 0 | 0 | 0 | 0 | 0 | 0 | 1 |
| Cluster23693 Proteobac Alphap Rhizc Bradyrhizobiaceae    | 0 | 0 | 0 | 0 | 0 | 0 | 0 | 1 | 0 | 0 | 0 | 0 | 1 |
| Cluster23700 Proteobac Gamm Pseu Pseudo Pseudomonas      | 0 | 0 | 0 | 0 | 0 | 1 | 0 | 0 | 0 | 0 | 0 | 0 | 1 |
| Cluster23706 Acidobact Acidobacteria_Gp3                 | 0 | 0 | 0 | 0 | 0 | 1 | 0 | 0 | 0 | 0 | 0 | 0 | 1 |
| Cluster23714 Acidobacteria                               | 0 | 0 | 0 | 0 | 1 | 0 | 0 | 0 | 0 | 0 | 0 | 0 | 1 |
| Cluster23719 Proteobac Betapr Burkl Burkhol Burkholderia | 0 | 0 | 0 | 0 | 0 | 0 | 0 | 1 | 0 | 0 | 0 | 0 | 1 |
| Cluster23728 Proteobac Gamm Legio Coxiella Aquicella     | 0 | 0 | 0 | 0 | 0 | 1 | 0 | 0 | 0 | 0 | 0 | 0 | 1 |
| Cluster23739;size=1                                      | 0 | 0 | 0 | 0 | 0 | 0 | 1 | 0 | 0 | 0 | 0 | 0 | 1 |
| Cluster23760 Acidobact Acidobacteria_Gp1                 | 0 | 0 | 0 | 0 | 0 | 0 | 0 | 0 | 1 | 0 | 0 | 0 | 1 |
| Cluster23766 Acidobact Acidobacteria_Gp1 Gp1             | 0 | 0 | 0 | 0 | 0 | 0 | 1 | 0 | 0 | 0 | 0 | 0 | 1 |
| Cluster23768 Acidobact Acidobacteria_Gp1 Gp1             | 0 | 0 | 0 | 0 | 0 | 0 | 0 | 1 | 0 | 0 | 0 | 0 | 1 |
| Cluster23783 Proteobacteria                              | 0 | 0 | 0 | 0 | 0 | 1 | 0 | 0 | 0 | 0 | 0 | 0 | 1 |
| Cluster23785 Acidobact Acidobacteria_Gp1 Gp1             | 0 | 0 | 0 | 0 | 0 | 0 | 0 | 1 | 0 | 0 | 0 | 0 | 1 |
| Cluster23786 Acidobact Acidobacteria_Gp1 Gp1             | 0 | 0 | 0 | 0 | 0 | 0 | 1 | 0 | 0 | 0 | 0 | 0 | 1 |
| Cluster23790;size=4                                      | 0 | 0 | 0 | 0 | 0 | 0 | 0 | 0 | 0 | 0 | 1 | 0 | 1 |
| Cluster23791 Acidobact Acidobacteria_Gp1 Gp1             | 0 | 0 | 0 | 0 | 0 | 1 | 0 | 0 | 0 | 0 | 0 | 0 | 1 |

|                                                            |   |   |   |   |   |   |   |   |   |   |   |   |   |
|------------------------------------------------------------|---|---|---|---|---|---|---|---|---|---|---|---|---|
| Cluster23812 Verrucom Subdivision3 Subdivision3_ξ          | 0 | 0 | 0 | 0 | 0 | 0 | 1 | 0 | 0 | 0 | 0 | 0 | 1 |
| Cluster23822 Acidobact Acidobacteria_Gp1                   | 0 | 0 | 0 | 0 | 1 | 0 | 0 | 0 | 0 | 0 | 0 | 0 | 1 |
| Cluster23826 Proteobac Gammaproteobacteria                 | 0 | 0 | 0 | 0 | 0 | 0 | 1 | 0 | 0 | 0 | 0 | 0 | 1 |
| Cluster23829 Proteobac Alphaproteobacteria                 | 0 | 0 | 0 | 0 | 0 | 0 | 1 | 0 | 0 | 0 | 0 | 0 | 1 |
| Cluster23843 Proteobac Alphaρ Rhodospirillales             | 0 | 0 | 0 | 0 | 1 | 0 | 0 | 0 | 0 | 0 | 0 | 0 | 1 |
| Cluster23862 Proteobac Gamm Xantl Sinobac Nevskia          | 0 | 0 | 0 | 0 | 0 | 0 | 1 | 0 | 0 | 0 | 0 | 0 | 1 |
| Cluster23869 Proteobac Alphaρ Rhizc Bradyrhizobiaceae      | 0 | 0 | 0 | 0 | 0 | 0 | 0 | 1 | 0 | 0 | 0 | 0 | 1 |
| Cluster23871 Chlamydi: Chlamy Chlar Parachlamydiaceae      | 1 | 0 | 0 | 0 | 0 | 0 | 0 | 0 | 0 | 0 | 0 | 0 | 1 |
| Cluster23872;size=5                                        | 0 | 0 | 0 | 0 | 0 | 0 | 1 | 0 | 0 | 0 | 0 | 0 | 1 |
| Cluster23874;size=3                                        | 0 | 0 | 0 | 0 | 0 | 0 | 0 | 0 | 1 | 0 | 0 | 0 | 1 |
| Cluster23883 Proteobac Gammaproteobacteria                 | 1 | 0 | 0 | 0 | 0 | 0 | 0 | 0 | 0 | 0 | 0 | 0 | 1 |
| Cluster23901 Acidobact Acidobacteria_Gp1 Gp1               | 0 | 0 | 0 | 0 | 0 | 0 | 1 | 0 | 0 | 0 | 0 | 0 | 1 |
| Cluster23902 Proteobac Alphaρ Rhodospirillales             | 0 | 0 | 0 | 0 | 0 | 0 | 0 | 1 | 0 | 0 | 0 | 0 | 1 |
| Cluster23904 Chlamydi: Chlamy Chlar Parachl: Parachlamydia | 0 | 0 | 0 | 0 | 0 | 0 | 1 | 0 | 0 | 0 | 0 | 0 | 1 |
| Cluster23905;size=2                                        | 0 | 0 | 0 | 0 | 1 | 0 | 0 | 0 | 0 | 0 | 0 | 0 | 1 |
| Cluster23923 Proteobac Gammaproteobacteria                 | 0 | 0 | 0 | 0 | 0 | 1 | 0 | 0 | 0 | 0 | 0 | 0 | 1 |
| Cluster23930 Actinobac Actinobacteria                      | 0 | 0 | 0 | 0 | 0 | 0 | 1 | 0 | 0 | 0 | 0 | 0 | 1 |
| Cluster23933 Proteobac Alphaproteobacteria                 | 0 | 0 | 0 | 0 | 0 | 1 | 0 | 0 | 0 | 0 | 0 | 0 | 1 |
| Cluster23934;size=1                                        | 0 | 0 | 0 | 0 | 0 | 1 | 0 | 0 | 0 | 0 | 0 | 0 | 1 |
| Cluster23935 Acidobact Acidobacteria_Gp1                   | 0 | 0 | 0 | 0 | 0 | 1 | 0 | 0 | 0 | 0 | 0 | 0 | 1 |
| Cluster23942 Bacteroid Sphing Sphir Sphingo Pedobacter     | 0 | 0 | 0 | 0 | 0 | 0 | 1 | 0 | 0 | 0 | 0 | 0 | 1 |
| Cluster23943 Acidobact Acidobacteria_Gp1                   | 0 | 0 | 0 | 1 | 0 | 0 | 0 | 0 | 0 | 0 | 0 | 0 | 1 |
| Cluster23954;size=15                                       | 0 | 0 | 1 | 0 | 0 | 0 | 0 | 0 | 0 | 0 | 0 | 0 | 1 |
| Cluster23956 Proteobac Alphaproteobacteria                 | 0 | 0 | 0 | 0 | 0 | 0 | 1 | 0 | 0 | 0 | 0 | 0 | 1 |
| Cluster23966 Actinobac Actinol Actin Actinosj Actinospica  | 0 | 0 | 0 | 0 | 0 | 0 | 0 | 0 | 1 | 0 | 0 | 0 | 1 |
| Cluster23970 Proteobac Gammaproteobacteria                 | 0 | 0 | 0 | 0 | 0 | 1 | 0 | 0 | 0 | 0 | 0 | 0 | 1 |
| Cluster23977 Actinobac Actinol Solirubrobacterales         | 0 | 0 | 0 | 0 | 0 | 0 | 0 | 0 | 0 | 1 | 0 | 0 | 1 |
| Cluster23979 Actinobac Actinol Actin Mycoba Mycobacteriur  | 0 | 0 | 0 | 0 | 0 | 0 | 1 | 0 | 0 | 0 | 0 | 0 | 1 |
| Cluster23980 Proteobac Gamm Xantl Xanthomonadaceae         | 0 | 0 | 0 | 0 | 0 | 1 | 0 | 0 | 0 | 0 | 0 | 0 | 1 |

|                                                          |   |   |   |   |   |   |   |   |   |   |   |   |   |
|----------------------------------------------------------|---|---|---|---|---|---|---|---|---|---|---|---|---|
| Cluster2398€ Bacteroid Sphing Sphir Sphingobacteriaceae  | 0 | 0 | 0 | 0 | 0 | 0 | 1 | 0 | 0 | 0 | 0 | 0 | 1 |
| Cluster24001 Proteobac Gamm Xantl Sinobac Steroidobacter | 1 | 0 | 0 | 0 | 0 | 0 | 0 | 0 | 0 | 0 | 0 | 0 | 1 |
| Cluster24012 Chlamydi: Chlamy Chlar Parachlamydiaceae    | 0 | 0 | 0 | 0 | 0 | 1 | 0 | 0 | 0 | 0 | 0 | 0 | 1 |
| Cluster24014 Proteobac Deltap Myxococcales               | 0 | 0 | 0 | 0 | 0 | 1 | 0 | 0 | 0 | 0 | 0 | 0 | 1 |
| Cluster2402€ Proteobac Gammaproteobacteria               | 0 | 0 | 0 | 0 | 0 | 1 | 0 | 0 | 0 | 0 | 0 | 0 | 1 |
| Cluster2403C Proteobac Alphap Caulc Caulobacteraceae     | 0 | 0 | 0 | 0 | 0 | 0 | 0 | 1 | 0 | 0 | 0 | 0 | 1 |
| Cluster2403€ Proteobacteria                              | 0 | 0 | 0 | 0 | 0 | 0 | 1 | 0 | 0 | 0 | 0 | 0 | 1 |
| Cluster2404€ Acidobact Acidobacteria_Gp2 Gp2             | 0 | 0 | 0 | 0 | 0 | 0 | 1 | 0 | 0 | 0 | 0 | 0 | 1 |
| Cluster24048;size=1                                      | 0 | 0 | 0 | 0 | 0 | 0 | 0 | 0 | 1 | 0 | 0 | 0 | 1 |
| Cluster2404€ Proteobac Gammaproteobacteria               | 0 | 0 | 0 | 0 | 1 | 0 | 0 | 0 | 0 | 0 | 0 | 0 | 1 |
| Cluster2405€ TM7 TM7_genera_i                            | 0 | 0 | 0 | 0 | 0 | 0 | 0 | 1 | 0 | 0 | 0 | 0 | 1 |
| Cluster2406€ Chlamydi: Chlamy Chlamydiales               | 0 | 0 | 0 | 0 | 0 | 0 | 0 | 0 | 1 | 0 | 0 | 0 | 1 |
| Cluster24071 Proteobac Alphaproteobacteria               | 0 | 0 | 0 | 0 | 0 | 0 | 0 | 1 | 0 | 0 | 0 | 0 | 1 |
| Cluster24073 Proteobac Alphap Rhodospirillales           | 0 | 0 | 0 | 0 | 0 | 0 | 0 | 0 | 0 | 1 | 0 | 0 | 1 |
| Cluster2407€ Acidobact Acidobacteria_Gp1                 | 0 | 0 | 0 | 0 | 0 | 0 | 1 | 0 | 0 | 0 | 0 | 0 | 1 |
| Cluster2408C Proteobac Betapr Burkl Burkholderiaceae     | 0 | 0 | 0 | 0 | 0 | 0 | 0 | 1 | 0 | 0 | 0 | 0 | 1 |
| Cluster24084 Acidobact Acidobacteria_Gp1 Gp1             | 0 | 0 | 0 | 0 | 0 | 0 | 0 | 0 | 0 | 1 | 0 | 0 | 1 |
| Cluster2408€ Proteobac Alphap Rhod Acetobacteraceae      | 0 | 0 | 0 | 0 | 1 | 0 | 0 | 0 | 0 | 0 | 0 | 0 | 1 |
| Cluster2409C Armatimc Chthor Chth Chthon Chthonomona:    | 0 | 0 | 0 | 0 | 0 | 0 | 0 | 1 | 0 | 0 | 0 | 0 | 1 |
| Cluster24101 Proteobac Alphaproteobacteria               | 0 | 0 | 0 | 0 | 0 | 0 | 0 | 1 | 0 | 0 | 0 | 0 | 1 |
| Cluster2410€ Bacteroid Sphing Sphir Chitinophagaceae     | 0 | 0 | 1 | 0 | 0 | 0 | 0 | 0 | 0 | 0 | 0 | 0 | 1 |
| Cluster24108;size=1                                      | 0 | 0 | 0 | 0 | 0 | 0 | 0 | 0 | 0 | 1 | 0 | 0 | 1 |
| Cluster24121 Proteobac Alphap Rhizobiales                | 0 | 0 | 0 | 0 | 0 | 0 | 0 | 0 | 0 | 1 | 0 | 0 | 1 |
| Cluster2412€ Acidobact Acidobacteria_Gp1                 | 0 | 0 | 0 | 0 | 1 | 0 | 0 | 0 | 0 | 0 | 0 | 0 | 1 |
| Cluster2413€ Proteobac Gammaproteobacteria               | 0 | 0 | 0 | 0 | 1 | 0 | 0 | 0 | 0 | 0 | 0 | 0 | 1 |
| Cluster24142 Proteobac Gammaproteobacteria               | 0 | 0 | 0 | 0 | 1 | 0 | 0 | 0 | 0 | 0 | 0 | 0 | 1 |
| Cluster24144 Proteobac Gamm Xantl Sinobacteraceae        | 0 | 0 | 0 | 0 | 0 | 0 | 0 | 0 | 0 | 1 | 0 | 0 | 1 |
| Cluster2414€ Proteobac Gammaproteobacteria               | 0 | 0 | 0 | 0 | 0 | 0 | 0 | 0 | 0 | 1 | 0 | 0 | 1 |
| Cluster24148;size=3                                      | 0 | 0 | 0 | 0 | 0 | 0 | 0 | 1 | 0 | 0 | 0 | 0 | 1 |

|                                                           |   |   |   |   |   |   |   |   |   |   |   |   |   |
|-----------------------------------------------------------|---|---|---|---|---|---|---|---|---|---|---|---|---|
| Cluster24151;size=1                                       | 0 | 0 | 0 | 0 | 1 | 0 | 0 | 0 | 0 | 0 | 0 | 0 | 1 |
| Cluster24153 Acidobact Acidobacteria_Gp1                  | 0 | 0 | 0 | 0 | 0 | 0 | 1 | 0 | 0 | 0 | 0 | 0 | 1 |
| Cluster24155 Acidobact Acidobacteria_Gp2 Gp2              | 0 | 0 | 0 | 0 | 0 | 0 | 0 | 0 | 0 | 0 | 0 | 1 | 1 |
| Cluster24158 Proteobac Alphap Rhizc Brucella Crabtreeella | 0 | 0 | 0 | 0 | 0 | 0 | 0 | 1 | 0 | 0 | 0 | 0 | 1 |
| Cluster24163 Proteobac Alphap Rhod Acetobacteraceae       | 0 | 0 | 0 | 0 | 1 | 0 | 0 | 0 | 0 | 0 | 0 | 0 | 1 |
| Cluster24165 Acidobacteria                                | 0 | 0 | 0 | 0 | 1 | 0 | 0 | 0 | 0 | 0 | 0 | 0 | 1 |
| Cluster24167 Proteobac Alphaproteobacteria                | 0 | 0 | 0 | 0 | 1 | 0 | 0 | 0 | 0 | 0 | 0 | 0 | 1 |
| Cluster24168 Proteobac Gamm Pseu Pseudo Rhizobacter       | 0 | 0 | 0 | 0 | 0 | 0 | 0 | 0 | 0 | 1 | 0 | 0 | 1 |
| Cluster24170 Acidobact Holop Holo Holophagaceae           | 0 | 0 | 0 | 0 | 0 | 0 | 0 | 0 | 0 | 1 | 0 | 0 | 1 |
| Cluster24173 Acidobact Acidobacteria_Gp1 Edaphobacter     | 0 | 0 | 0 | 0 | 0 | 0 | 0 | 0 | 0 | 1 | 0 | 0 | 1 |
| Cluster24174 Chlamydi Chlamy Chlar Parachlamydiaceae      | 0 | 0 | 0 | 0 | 1 | 0 | 0 | 0 | 0 | 0 | 0 | 0 | 1 |
| Cluster24179 Acidobact Acidobacteria_Gp3 Gp3              | 0 | 0 | 0 | 0 | 0 | 0 | 1 | 0 | 0 | 0 | 0 | 0 | 1 |
| Cluster24182 Proteobac Deltap Myxococcales                | 0 | 0 | 0 | 0 | 0 | 0 | 1 | 0 | 0 | 0 | 0 | 0 | 1 |
| Cluster24184 Acidobact Acidobacteria_Gp1                  | 0 | 0 | 0 | 0 | 0 | 0 | 1 | 0 | 0 | 0 | 0 | 0 | 1 |
| Cluster24185 Acidobacteria                                | 0 | 0 | 0 | 0 | 0 | 0 | 1 | 0 | 0 | 0 | 0 | 0 | 1 |
| Cluster24188 Proteobac Alphaproteobacteria                | 0 | 0 | 0 | 0 | 1 | 0 | 0 | 0 | 0 | 0 | 0 | 0 | 1 |
| Cluster24191;size=1                                       | 0 | 0 | 0 | 0 | 1 | 0 | 0 | 0 | 0 | 0 | 0 | 0 | 1 |
| Cluster24196 Proteobac Deltap Myxococcales                | 0 | 0 | 0 | 0 | 1 | 0 | 0 | 0 | 0 | 0 | 0 | 0 | 1 |
| Cluster24202 Acidobact Acidobacteria_Gp3 Gp3              | 0 | 0 | 0 | 0 | 0 | 0 | 0 | 0 | 0 | 1 | 0 | 0 | 1 |
| Cluster24208 Proteobac Deltaproteobacteria                | 0 | 0 | 0 | 0 | 0 | 0 | 0 | 0 | 0 | 0 | 1 | 0 | 1 |
| Cluster24209 Proteobac Alphap Rhod Acetobacteraceae       | 0 | 0 | 0 | 0 | 1 | 0 | 0 | 0 | 0 | 0 | 0 | 0 | 1 |
| Cluster24219 Proteobacteria                               | 0 | 0 | 0 | 0 | 0 | 0 | 0 | 1 | 0 | 0 | 0 | 0 | 1 |
| Cluster24220;size=1                                       | 0 | 0 | 0 | 0 | 1 | 0 | 0 | 0 | 0 | 0 | 0 | 0 | 1 |
| Cluster24226 Proteobac Alphap Sphir Sphingo Novosphingob  | 0 | 0 | 0 | 0 | 0 | 0 | 1 | 0 | 0 | 0 | 0 | 0 | 1 |
| Cluster24230 Proteobac Gammaproteobacteria                | 0 | 0 | 0 | 0 | 0 | 0 | 0 | 1 | 0 | 0 | 0 | 0 | 1 |
| Cluster24239 Acidobact Acidobacteria_Gp3                  | 0 | 0 | 0 | 0 | 0 | 0 | 0 | 1 | 0 | 0 | 0 | 0 | 1 |
| Cluster24241 Acidobact Holop Holo Holophagaceae           | 0 | 0 | 0 | 0 | 1 | 0 | 0 | 0 | 0 | 0 | 0 | 0 | 1 |
| Cluster24244 Proteobacteria                               | 0 | 0 | 0 | 0 | 0 | 0 | 0 | 1 | 0 | 0 | 0 | 0 | 1 |
| Cluster24245;size=3                                       | 0 | 0 | 0 | 0 | 0 | 0 | 0 | 0 | 0 | 0 | 1 | 0 | 1 |

|                                                            |   |   |   |   |   |   |   |   |   |   |   |   |   |
|------------------------------------------------------------|---|---|---|---|---|---|---|---|---|---|---|---|---|
| Cluster24248 Acidobact Acidobacteria_Gp2 Gp2               | 0 | 0 | 0 | 0 | 1 | 0 | 0 | 0 | 0 | 0 | 0 | 0 | 1 |
| Cluster24254 Proteobac Gamm Legio Coxiella Aquicella       | 0 | 0 | 0 | 0 | 0 | 0 | 0 | 0 | 1 | 0 | 0 | 0 | 1 |
| Cluster24256 Proteobac Alphap Rhizc Xantho Pseudolabrys    | 0 | 0 | 0 | 0 | 0 | 0 | 0 | 0 | 0 | 0 | 1 | 0 | 1 |
| Cluster24258 Acidobact Acidobacteria_Gp2 Gp2               | 0 | 0 | 0 | 0 | 1 | 0 | 0 | 0 | 0 | 0 | 0 | 0 | 1 |
| Cluster24262;size=1                                        | 0 | 0 | 0 | 0 | 1 | 0 | 0 | 0 | 0 | 0 | 0 | 0 | 1 |
| Cluster24264 Proteobac Alphap Alphaproteok Rhizomicrobiu   | 0 | 0 | 0 | 0 | 0 | 0 | 0 | 1 | 0 | 0 | 0 | 0 | 1 |
| Cluster24265 Proteobac Alphap Caulc Caulobz Phenylobacter  | 0 | 0 | 0 | 0 | 1 | 0 | 0 | 0 | 0 | 0 | 0 | 0 | 1 |
| Cluster24268 Acidobacteria                                 | 0 | 0 | 0 | 0 | 1 | 0 | 0 | 0 | 0 | 0 | 0 | 0 | 1 |
| Cluster24274 Chlamydi: Chlamy Chlar Parachl: Parachlamydia | 0 | 0 | 0 | 0 | 0 | 0 | 1 | 0 | 0 | 0 | 0 | 0 | 1 |
| Cluster24275 Acidobact Acidobacteria_Gp1                   | 0 | 0 | 0 | 0 | 0 | 0 | 1 | 0 | 0 | 0 | 0 | 0 | 1 |
| Cluster24277 Actinobac Actinobacteria                      | 0 | 0 | 0 | 0 | 1 | 0 | 0 | 0 | 0 | 0 | 0 | 0 | 1 |
| Cluster24278 Actinobac Actinol Soliru Conexib Conexibacter | 0 | 0 | 0 | 0 | 0 | 0 | 0 | 1 | 0 | 0 | 0 | 0 | 1 |
| Cluster24280;size=1                                        | 0 | 0 | 0 | 0 | 0 | 0 | 0 | 1 | 0 | 0 | 0 | 0 | 1 |
| Cluster24282 Proteobac Alphap Rhizc Bradyrhizobiaceae      | 0 | 0 | 0 | 0 | 1 | 0 | 0 | 0 | 0 | 0 | 0 | 0 | 1 |
| Cluster24288 Chloroflex Ktedor Ktedonobacterales           | 0 | 0 | 0 | 0 | 0 | 0 | 0 | 1 | 0 | 0 | 0 | 0 | 1 |
| Cluster24298 Proteobac Gammaproteobacteria                 | 0 | 0 | 0 | 0 | 1 | 0 | 0 | 0 | 0 | 0 | 0 | 0 | 1 |
| Cluster24299 Acidobact Acidobacteria_Gp3 Gp3               | 0 | 0 | 0 | 0 | 1 | 0 | 0 | 0 | 0 | 0 | 0 | 0 | 1 |
| Cluster24306 Actinobac Actinol Solirubrobacterales         | 0 | 0 | 0 | 0 | 0 | 0 | 0 | 1 | 0 | 0 | 0 | 0 | 1 |
| Cluster24308;size=2                                        | 0 | 0 | 0 | 0 | 0 | 0 | 1 | 0 | 0 | 0 | 0 | 0 | 1 |
| Cluster24310;size=1                                        | 0 | 0 | 0 | 0 | 1 | 0 | 0 | 0 | 0 | 0 | 0 | 0 | 1 |
| Cluster24311 Proteobac Alphap Sphir Sphingo Sphingomonas   | 0 | 0 | 0 | 0 | 0 | 0 | 0 | 1 | 0 | 0 | 0 | 0 | 1 |
| Cluster24316 Actinobac Actinol Actin Actinosj Actinospica  | 0 | 0 | 0 | 0 | 0 | 0 | 0 | 0 | 0 | 1 | 0 | 0 | 1 |
| Cluster24320 Acidobact Acidobacteria_Gp1 Acidobacteriur    | 0 | 0 | 0 | 0 | 0 | 0 | 0 | 0 | 0 | 1 | 0 | 0 | 1 |
| Cluster24324 Proteobac Betapr Burkl Comamonadaceae         | 0 | 0 | 0 | 0 | 0 | 0 | 1 | 0 | 0 | 0 | 0 | 0 | 1 |
| Cluster24326 Acidobact Acidobacteria_Gp1                   | 0 | 0 | 0 | 0 | 1 | 0 | 0 | 0 | 0 | 0 | 0 | 0 | 1 |
| Cluster24338;size=1                                        | 0 | 0 | 0 | 0 | 1 | 0 | 0 | 0 | 0 | 0 | 0 | 0 | 1 |
| Cluster24339 Actinobac Actinol Actinomycetales             | 0 | 0 | 0 | 0 | 1 | 0 | 0 | 0 | 0 | 0 | 0 | 0 | 1 |
| Cluster24346;size=1                                        | 0 | 0 | 0 | 0 | 0 | 0 | 1 | 0 | 0 | 0 | 0 | 0 | 1 |
| Cluster24349 Bacteroid Sphing Sphir Sphingo Mucilaginibact | 0 | 0 | 0 | 0 | 0 | 0 | 0 | 1 | 0 | 0 | 0 | 0 | 1 |

|                                                            |   |   |   |   |   |   |   |   |   |   |   |   |   |
|------------------------------------------------------------|---|---|---|---|---|---|---|---|---|---|---|---|---|
| Cluster24354 Proteobac Betapr Burkl Oxaloba Duganella      | 0 | 0 | 0 | 1 | 0 | 0 | 0 | 0 | 0 | 0 | 0 | 0 | 1 |
| Cluster24358 Acidobact Acidobacteria_Gp10 Gp10             | 0 | 0 | 0 | 0 | 1 | 0 | 0 | 0 | 0 | 0 | 0 | 0 | 1 |
| Cluster24366 Acidobact Acidobacteria_Gp1                   | 0 | 0 | 0 | 0 | 1 | 0 | 0 | 0 | 0 | 0 | 0 | 0 | 1 |
| Cluster24371 Chlamydi: Chlamy Chlar Parachl: Parachlamydia | 0 | 0 | 0 | 0 | 0 | 0 | 1 | 0 | 0 | 0 | 0 | 0 | 1 |
| Cluster24373 Proteobac Alphap Caulc Caulobacteraceae       | 0 | 0 | 0 | 0 | 0 | 0 | 0 | 1 | 0 | 0 | 0 | 0 | 1 |
| Cluster24376 Acidobact Acidobacteria_Gp2 Gp2               | 0 | 0 | 0 | 0 | 0 | 0 | 0 | 1 | 0 | 0 | 0 | 0 | 1 |
| Cluster24378 Proteobac Gammaproteobacteria                 | 0 | 0 | 0 | 0 | 0 | 0 | 1 | 0 | 0 | 0 | 0 | 0 | 1 |
| Cluster24381 Acidobact Acidobacteria_Gp2 Gp2               | 0 | 0 | 0 | 0 | 0 | 0 | 0 | 0 | 0 | 1 | 0 | 0 | 1 |
| Cluster24383 Proteobac Alphaproteobacteria                 | 0 | 0 | 0 | 0 | 0 | 0 | 0 | 1 | 0 | 0 | 0 | 0 | 1 |
| Cluster24384;size=1                                        | 0 | 0 | 0 | 0 | 0 | 0 | 0 | 1 | 0 | 0 | 0 | 0 | 1 |
| Cluster24386 Proteobac Gamm Xantl Sinobacteraceae          | 0 | 0 | 0 | 0 | 0 | 0 | 0 | 1 | 0 | 0 | 0 | 0 | 1 |
| Cluster24389 Proteobacteria                                | 0 | 0 | 0 | 0 | 0 | 0 | 0 | 1 | 0 | 0 | 0 | 0 | 1 |
| Cluster24391 Proteobac Alphaproteobacteria                 | 0 | 0 | 0 | 0 | 1 | 0 | 0 | 0 | 0 | 0 | 0 | 0 | 1 |
| Cluster24393 Proteobac Alphaproteobacteria                 | 0 | 0 | 0 | 1 | 0 | 0 | 0 | 0 | 0 | 0 | 0 | 0 | 1 |
| Cluster24395 Bacteroid Sphing Sphir Chitinophagaceae       | 0 | 0 | 0 | 0 | 0 | 0 | 0 | 1 | 0 | 0 | 0 | 0 | 1 |
| Cluster24398 Bacteroid Sphing Sphir Chitino Lacibacter     | 0 | 0 | 0 | 0 | 0 | 0 | 1 | 0 | 0 | 0 | 0 | 0 | 1 |
| Cluster24408 Verrucom Spartobacteria Spartobacteria        | 0 | 0 | 0 | 0 | 1 | 0 | 0 | 0 | 0 | 0 | 0 | 0 | 1 |
| Cluster24410 Acidobact Acidobacteria_Gp1 Gp1               | 0 | 0 | 0 | 0 | 0 | 0 | 0 | 1 | 0 | 0 | 0 | 0 | 1 |
| Cluster24413 Chlamydi: Chlamy Chlar Parachlamydiaceae      | 0 | 0 | 0 | 0 | 0 | 0 | 1 | 0 | 0 | 0 | 0 | 0 | 1 |
| Cluster24423 Acidobact Acidobacteria_Gp1                   | 0 | 0 | 0 | 0 | 0 | 0 | 0 | 0 | 0 | 0 | 1 | 0 | 1 |
| Cluster24447 Acidobact Acidobacteria_Gp2 Gp2               | 0 | 0 | 0 | 0 | 0 | 0 | 0 | 1 | 0 | 0 | 0 | 0 | 1 |
| Cluster24459 Actinobac Actino Actinomycetales              | 0 | 0 | 0 | 0 | 0 | 0 | 0 | 1 | 0 | 0 | 0 | 0 | 1 |
| Cluster24475 Proteobac Alphap Alphaproteok Rhizomicrobiu   | 0 | 0 | 0 | 0 | 0 | 0 | 0 | 1 | 0 | 0 | 0 | 0 | 1 |
| Cluster24476;size=1                                        | 0 | 0 | 0 | 0 | 0 | 0 | 0 | 1 | 0 | 0 | 0 | 0 | 1 |
| Cluster24488 Acidobact Acidobacteria_Gp1 Gp1               | 0 | 1 | 0 | 0 | 0 | 0 | 0 | 0 | 0 | 0 | 0 | 0 | 1 |
| Cluster24491 Acidobact Acidobacteria_Gp2 Gp2               | 0 | 0 | 0 | 0 | 1 | 0 | 0 | 0 | 0 | 0 | 0 | 0 | 1 |
| Cluster24496 Acidobact Acidobacteria_Gp1                   | 0 | 0 | 0 | 0 | 0 | 0 | 0 | 0 | 0 | 0 | 1 | 0 | 1 |
| Cluster24498 Proteobacteria                                | 0 | 0 | 0 | 0 | 0 | 0 | 0 | 0 | 1 | 0 | 0 | 0 | 1 |
| Cluster24500 Acidobact Acidobacteria_Gp1 Gp1               | 0 | 0 | 0 | 0 | 0 | 0 | 0 | 1 | 0 | 0 | 0 | 0 | 1 |

|                                                            |   |   |   |   |   |   |   |   |   |   |   |   |   |
|------------------------------------------------------------|---|---|---|---|---|---|---|---|---|---|---|---|---|
| Cluster24502 Proteobac Alphap Rhodospirillales             | 0 | 0 | 0 | 0 | 0 | 0 | 0 | 1 | 0 | 0 | 0 | 0 | 1 |
| Cluster24508 Acidobact Acidobacteria_Gp1                   | 0 | 0 | 0 | 0 | 1 | 0 | 0 | 0 | 0 | 0 | 0 | 0 | 1 |
| Cluster24511 Proteobac Gammaproteobacteria                 | 0 | 0 | 0 | 0 | 0 | 0 | 0 | 1 | 0 | 0 | 0 | 0 | 1 |
| Cluster24517 Acidobact Acidobacteria_Gp2 Gp2               | 0 | 0 | 0 | 0 | 0 | 0 | 1 | 0 | 0 | 0 | 0 | 0 | 1 |
| Cluster24521 Chlamydi: Chlamy Chlar Parachl: Parachlamydia | 0 | 0 | 0 | 0 | 0 | 0 | 0 | 0 | 1 | 0 | 0 | 0 | 1 |
| Cluster24528 Proteobac Alphap Alphaproteob Rhizomicrobiu   | 0 | 0 | 0 | 1 | 0 | 0 | 0 | 0 | 0 | 0 | 0 | 0 | 1 |
| Cluster24529 Acidobact Acidobacteria_Gp2 Gp2               | 0 | 0 | 0 | 0 | 0 | 0 | 0 | 1 | 0 | 0 | 0 | 0 | 1 |
| Cluster24531 Acidobacteria                                 | 0 | 0 | 0 | 0 | 1 | 0 | 0 | 0 | 0 | 0 | 0 | 0 | 1 |
| Cluster24541 Proteobacteria                                | 0 | 0 | 0 | 0 | 0 | 0 | 0 | 0 | 0 | 0 | 0 | 1 | 1 |
| Cluster24542 Acidobacteria                                 | 0 | 0 | 0 | 0 | 1 | 0 | 0 | 0 | 0 | 0 | 0 | 0 | 1 |
| Cluster24543 Acidobact Acidobacteria_Gp3 Bryobacter        | 0 | 0 | 0 | 0 | 0 | 0 | 0 | 0 | 0 | 0 | 1 | 0 | 1 |
| Cluster24552 Acidobact Acidobacteria_Gp6 Gp6               | 0 | 0 | 0 | 0 | 1 | 0 | 0 | 0 | 0 | 0 | 0 | 0 | 1 |
| Cluster24577 Proteobac Gammaproteobacteria                 | 0 | 0 | 0 | 0 | 0 | 0 | 0 | 0 | 0 | 0 | 1 | 0 | 1 |
| Cluster24578 Acidobact Acidobacteria_Gp2 Gp2               | 0 | 0 | 0 | 1 | 0 | 0 | 0 | 0 | 0 | 0 | 0 | 0 | 1 |
| Cluster24581 Actinobac Actinol Actin Mycoba Mycobacteriur  | 0 | 0 | 0 | 0 | 0 | 0 | 0 | 0 | 0 | 0 | 1 | 0 | 1 |
| Cluster24583 Chloroflex Ktedor Ktedo Ktedon Ktedonobacter  | 0 | 0 | 0 | 0 | 0 | 0 | 1 | 0 | 0 | 0 | 0 | 0 | 1 |
| Cluster24585 Bacteroid Sphing Sphir Sphingo Mucilaginibact | 0 | 0 | 0 | 0 | 0 | 0 | 1 | 0 | 0 | 0 | 0 | 0 | 1 |
| Cluster24587 Proteobac Alphap Rhizobiales                  | 0 | 0 | 0 | 0 | 0 | 0 | 1 | 0 | 0 | 0 | 0 | 0 | 1 |
| Cluster24589 Acidobact Acidobacteria_Gp1 Gp1               | 0 | 1 | 0 | 0 | 0 | 0 | 0 | 0 | 0 | 0 | 0 | 0 | 1 |
| Cluster24600 Proteobac Alphap Rhod Rhodospirillaceae       | 0 | 0 | 0 | 0 | 0 | 0 | 1 | 0 | 0 | 0 | 0 | 0 | 1 |
| Cluster24601 Acidobact Acidobacteria_Gp3                   | 0 | 1 | 0 | 0 | 0 | 0 | 0 | 0 | 0 | 0 | 0 | 0 | 1 |
| Cluster24607 Chloroflex Ktedor Ktedonobacterales           | 0 | 0 | 1 | 0 | 0 | 0 | 0 | 0 | 0 | 0 | 0 | 0 | 1 |
| Cluster24616 Chloroflex Ktedor Ktedonobacterales           | 0 | 1 | 0 | 0 | 0 | 0 | 0 | 0 | 0 | 0 | 0 | 0 | 1 |
| Cluster24617 Proteobac Gammaproteobacteria                 | 0 | 0 | 0 | 0 | 0 | 0 | 0 | 1 | 0 | 0 | 0 | 0 | 1 |
| Cluster24627 Actinobac Actinol Actin Mycoba Mycobacteriur  | 0 | 1 | 0 | 0 | 0 | 0 | 0 | 0 | 0 | 0 | 0 | 0 | 1 |
| Cluster24628 Acidobact Acidobacteria_Gp6 Gp6               | 0 | 0 | 0 | 0 | 0 | 1 | 0 | 0 | 0 | 0 | 0 | 0 | 1 |
| Cluster24632 Actinobac Actinol Solir: Conexib Conexibacter | 0 | 0 | 0 | 0 | 0 | 0 | 0 | 0 | 0 | 0 | 0 | 1 | 1 |
| Cluster24636 Proteobac Gamm Pseu: Pseudo: Rugamonas        | 0 | 0 | 1 | 0 | 0 | 0 | 0 | 0 | 0 | 0 | 0 | 0 | 1 |
| Cluster24639 Firmicute: Bacilli Bacillales                 | 0 | 0 | 0 | 0 | 0 | 0 | 1 | 0 | 0 | 0 | 0 | 0 | 1 |





|                                                            |   |   |   |   |   |   |   |   |   |   |   |   |   |
|------------------------------------------------------------|---|---|---|---|---|---|---|---|---|---|---|---|---|
| Cluster24793 Acidobact Acidobacteria_Gp4 Gp4               | 0 | 0 | 0 | 0 | 0 | 0 | 0 | 0 | 1 | 0 | 0 | 0 | 1 |
| Cluster24795;size=5                                        | 1 | 0 | 0 | 0 | 0 | 0 | 0 | 0 | 0 | 0 | 0 | 0 | 1 |
| Cluster24820 Proteobac Alphap Rhizomicrobiu                | 0 | 0 | 0 | 1 | 0 | 0 | 0 | 0 | 0 | 0 | 0 | 0 | 1 |
| Cluster24821 Acidobact Acidobacteria_Gp13 Gp13             | 0 | 0 | 0 | 0 | 0 | 0 | 1 | 0 | 0 | 0 | 0 | 0 | 1 |
| Cluster24830 Acidobact Acidobacteria_Gp2 Gp2               | 0 | 0 | 0 | 0 | 1 | 0 | 0 | 0 | 0 | 0 | 0 | 0 | 1 |
| Cluster24831 Proteobac Gamm Xantl Sinobacteraceae          | 0 | 0 | 1 | 0 | 0 | 0 | 0 | 0 | 0 | 0 | 0 | 0 | 1 |
| Cluster24834 Proteobac Alphaproteobacteria                 | 0 | 0 | 1 | 0 | 0 | 0 | 0 | 0 | 0 | 0 | 0 | 0 | 1 |
| Cluster24837 Actinobac Actinol Actinomycetales             | 0 | 0 | 1 | 0 | 0 | 0 | 0 | 0 | 0 | 0 | 0 | 0 | 1 |
| Cluster24839 Proteobac Alphaproteobacteria                 | 0 | 0 | 0 | 0 | 0 | 0 | 1 | 0 | 0 | 0 | 0 | 0 | 1 |
| Cluster24843 Chloroflex Ktedon Ktedonobacter               | 0 | 0 | 0 | 0 | 0 | 0 | 0 | 0 | 0 | 0 | 0 | 1 | 1 |
| Cluster24851 Actinobac Actinol Actinomycetales             | 0 | 0 | 0 | 0 | 0 | 0 | 0 | 0 | 0 | 0 | 1 | 0 | 1 |
| Cluster24853 Proteobac Gamm Xantl Sinobac Steroidobacter   | 0 | 0 | 0 | 0 | 0 | 0 | 1 | 0 | 0 | 0 | 0 | 0 | 1 |
| Cluster24856 Bacteroid Sphing Sphir Sphingo Mucilaginibact | 0 | 0 | 0 | 0 | 0 | 0 | 0 | 1 | 0 | 0 | 0 | 0 | 1 |
| Cluster24861 Acidobact Acidobacteria_Gp1 Gp1               | 0 | 0 | 0 | 0 | 0 | 0 | 0 | 0 | 0 | 0 | 0 | 1 | 1 |
| Cluster24865 Acidobact Acidobacteria_Gp3 Gp3               | 0 | 0 | 0 | 0 | 0 | 0 | 0 | 1 | 0 | 0 | 0 | 0 | 1 |
| Cluster24866 Actinobac Actinol Actinomycetales             | 0 | 0 | 0 | 0 | 0 | 0 | 0 | 0 | 0 | 0 | 0 | 1 | 1 |
| Cluster24868 Proteobac Alphap Rhod Acetobacteraceae        | 0 | 0 | 0 | 0 | 0 | 0 | 1 | 0 | 0 | 0 | 0 | 0 | 1 |
| Cluster24876 Bacteroid Sphing Sphir Chitino Terrimonas     | 0 | 0 | 0 | 0 | 0 | 0 | 0 | 0 | 0 | 0 | 1 | 0 | 1 |
| Cluster24880 Bacteroid Sphing Sphir Sphingo Mucilaginibact | 0 | 0 | 0 | 0 | 0 | 0 | 1 | 0 | 0 | 0 | 0 | 0 | 1 |
| Cluster24895 Proteobac Gamm Xantl Sinobacteraceae          | 0 | 0 | 0 | 0 | 0 | 0 | 0 | 1 | 0 | 0 | 0 | 0 | 1 |
| Cluster24896 Bacteroid Bacteroidetes_incert Ohtaekwangia   | 0 | 0 | 1 | 0 | 0 | 0 | 0 | 0 | 0 | 0 | 0 | 0 | 1 |
| Cluster24898 Acidobact Acidobacteria_Gp3                   | 0 | 0 | 0 | 0 | 0 | 0 | 0 | 1 | 0 | 0 | 0 | 0 | 1 |
| Cluster24899;size=1                                        | 0 | 0 | 0 | 0 | 0 | 0 | 0 | 0 | 0 | 0 | 0 | 1 | 1 |
| Cluster24903 Actinobac Actinol Actinomycetales             | 0 | 1 | 0 | 0 | 0 | 0 | 0 | 0 | 0 | 0 | 0 | 0 | 1 |
| Cluster24908 Proteobac Alphap Rhizobiales                  | 0 | 0 | 1 | 0 | 0 | 0 | 0 | 0 | 0 | 0 | 0 | 0 | 1 |
| Cluster24931 Actinobac Actinol Actinomycetales             | 0 | 0 | 0 | 0 | 0 | 0 | 0 | 0 | 0 | 0 | 0 | 1 | 1 |
| Cluster24934 Proteobac Gamm Legio Coxiella Aquicella       | 0 | 0 | 0 | 0 | 0 | 1 | 0 | 0 | 0 | 0 | 0 | 0 | 1 |
| Cluster24942 Proteobac Betaproteobacteria                  | 0 | 0 | 1 | 0 | 0 | 0 | 0 | 0 | 0 | 0 | 0 | 0 | 1 |
| Cluster24943 Proteobac Deltap Myxc Polyangiaceae           | 0 | 0 | 0 | 0 | 0 | 0 | 0 | 0 | 0 | 0 | 1 | 0 | 1 |



|                                                                  |   |   |   |   |   |   |   |   |   |   |   |   |   |
|------------------------------------------------------------------|---|---|---|---|---|---|---|---|---|---|---|---|---|
| Cluster25124 Proteobac Betaproteobacteria                        | 0 | 1 | 0 | 0 | 0 | 0 | 0 | 0 | 0 | 0 | 0 | 0 | 1 |
| Cluster25125 Acidobact Acidobacteria_Gp3                         | 0 | 0 | 0 | 0 | 0 | 0 | 1 | 0 | 0 | 0 | 0 | 0 | 1 |
| Cluster25127 Proteobac Gamm Legio Coxiella Coxiella              | 0 | 0 | 0 | 0 | 0 | 1 | 0 | 0 | 0 | 0 | 0 | 0 | 1 |
| Cluster25140 Verrucom Opitut: Opitu Opituta Opitutus             | 0 | 0 | 0 | 0 | 0 | 0 | 0 | 0 | 0 | 0 | 0 | 1 | 1 |
| Cluster25147 Bacteroid Sphing Sphir Chitinoꝝ Flavitalea          | 0 | 0 | 0 | 0 | 0 | 0 | 1 | 0 | 0 | 0 | 0 | 0 | 1 |
| Cluster25149 Proteobac Gamm Legio Coxiella Aquicella             | 0 | 0 | 1 | 0 | 0 | 0 | 0 | 0 | 0 | 0 | 0 | 0 | 1 |
| Cluster25152 Actinobac Actinol Actinomycetales                   | 0 | 0 | 0 | 0 | 0 | 0 | 1 | 0 | 0 | 0 | 0 | 0 | 1 |
| Cluster25155 Firmicute: Bacilli Bacill Alicyclo Alicyclobacillus | 0 | 0 | 0 | 0 | 0 | 0 | 0 | 0 | 0 | 0 | 1 | 0 | 1 |
| Cluster25161 Proteobac Gammaproteobacteria                       | 0 | 0 | 0 | 0 | 0 | 1 | 0 | 0 | 0 | 0 | 0 | 0 | 1 |
| Cluster25175 Acidobacteria                                       | 0 | 0 | 0 | 0 | 0 | 0 | 0 | 0 | 0 | 0 | 0 | 1 | 1 |
| Cluster25179 Acidobact Acidobacteria_Gp1                         | 0 | 0 | 0 | 0 | 0 | 0 | 0 | 0 | 0 | 0 | 0 | 1 | 1 |
| Cluster25185 Acidobact Acidobacteria_Gp2 Gp2                     | 0 | 0 | 0 | 0 | 0 | 0 | 0 | 1 | 0 | 0 | 0 | 0 | 1 |
| Cluster25188 Acidobact Acidobacteria_Gp2 Gp2                     | 0 | 0 | 0 | 0 | 0 | 0 | 0 | 0 | 0 | 0 | 0 | 1 | 1 |
| Cluster25192;size=3                                              | 0 | 0 | 0 | 1 | 0 | 0 | 0 | 0 | 0 | 0 | 0 | 0 | 1 |
| Cluster25202 Proteobac Alphaproteobacteria                       | 0 | 0 | 1 | 0 | 0 | 0 | 0 | 0 | 0 | 0 | 0 | 0 | 1 |
| Cluster25204 Proteobac Alphaꝝ Rhizobiales                        | 0 | 0 | 0 | 0 | 0 | 0 | 0 | 0 | 0 | 0 | 0 | 1 | 1 |
| Cluster25205 Chloroflex Ktedor Ktedonobacterales                 | 0 | 0 | 0 | 0 | 0 | 0 | 1 | 0 | 0 | 0 | 0 | 0 | 1 |
| Cluster25216 Proteobac Alphaꝝ Caulc Caulobaꝝ Phenylobacter       | 0 | 0 | 0 | 0 | 0 | 0 | 0 | 1 | 0 | 0 | 0 | 0 | 1 |
| Cluster25219 Acidobact Acidobacteria_Gp2 Gp2                     | 0 | 0 | 0 | 0 | 0 | 0 | 0 | 1 | 0 | 0 | 0 | 0 | 1 |
| Cluster25231 Bacteroid Sphing Sphir Chitinophagaceae             | 0 | 0 | 1 | 0 | 0 | 0 | 0 | 0 | 0 | 0 | 0 | 0 | 1 |
| Cluster25233 Proteobac Gammaproteobacteria                       | 0 | 0 | 0 | 0 | 1 | 0 | 0 | 0 | 0 | 0 | 0 | 0 | 1 |
| Cluster25237 Proteobac Gamm Xantl Xanthomonadaceae               | 0 | 0 | 0 | 0 | 0 | 0 | 0 | 1 | 0 | 0 | 0 | 0 | 1 |
| Cluster25241 Acidobact Acidobacteria_Gp1 Gp1                     | 0 | 0 | 0 | 0 | 0 | 0 | 0 | 0 | 0 | 0 | 0 | 1 | 1 |
| Cluster25249 Proteobac Gamm Xantl Sinobacteraceae                | 0 | 0 | 0 | 0 | 0 | 0 | 0 | 0 | 0 | 0 | 0 | 1 | 1 |
| Cluster25251 Bacteroid Sphing Sphir Sphingo Sphingobacter        | 0 | 0 | 0 | 0 | 0 | 0 | 0 | 0 | 0 | 0 | 0 | 1 | 1 |
| Cluster25270 Proteobac Alphaproteobacteria                       | 0 | 0 | 0 | 0 | 0 | 0 | 1 | 0 | 0 | 0 | 0 | 0 | 1 |
| Cluster25272 Bacteroid Sphing Sphir Sphingo Mucilaginibact       | 1 | 0 | 0 | 0 | 0 | 0 | 0 | 0 | 0 | 0 | 0 | 0 | 1 |
| Cluster25275 Proteobac Gamm Legio Coxiella Aquicella             | 0 | 0 | 0 | 0 | 0 | 0 | 1 | 0 | 0 | 0 | 0 | 0 | 1 |
| Cluster25282 Proteobac Alphaꝝ Alphaproteoꝝ Rhizomicrobiu         | 0 | 0 | 0 | 0 | 0 | 0 | 0 | 0 | 1 | 0 | 0 | 0 | 1 |

|                                                              |   |   |   |   |   |   |   |   |   |   |   |   |   |
|--------------------------------------------------------------|---|---|---|---|---|---|---|---|---|---|---|---|---|
| Cluster25286 Proteobac Gammaproteobacteria                   | 0 | 0 | 0 | 0 | 0 | 0 | 0 | 0 | 0 | 0 | 0 | 1 | 1 |
| Cluster25288 Acidobact Acidobacteria_Gp3                     | 0 | 0 | 0 | 0 | 0 | 0 | 0 | 1 | 0 | 0 | 0 | 0 | 1 |
| Cluster25289 Actinobac Actinol Acidi Acidimii Aciditerrimona | 0 | 0 | 0 | 1 | 0 | 0 | 0 | 0 | 0 | 0 | 0 | 0 | 1 |
| Cluster25290;size=2                                          | 0 | 0 | 0 | 0 | 0 | 0 | 1 | 0 | 0 | 0 | 0 | 0 | 1 |
| Cluster25296 Proteobac Alphap Caulc Cauloba Caulobacter      | 0 | 0 | 1 | 0 | 0 | 0 | 0 | 0 | 0 | 0 | 0 | 0 | 1 |
| Cluster25297 Proteobac Betapr Burkl Burkhol Burkholderia     | 0 | 0 | 0 | 0 | 0 | 0 | 0 | 0 | 0 | 0 | 0 | 1 | 1 |
| Cluster25299 Proteobac Alphap Rhod Acetobz Acidisphaera      | 0 | 0 | 1 | 0 | 0 | 0 | 0 | 0 | 0 | 0 | 0 | 0 | 1 |
| Cluster25300 Bacteroid Sphing Sphir Sphingo Pedobacter       | 0 | 0 | 0 | 0 | 0 | 0 | 0 | 1 | 0 | 0 | 0 | 0 | 1 |
| Cluster25312 Proteobacteria                                  | 0 | 0 | 0 | 0 | 0 | 0 | 0 | 1 | 0 | 0 | 0 | 0 | 1 |
| Cluster25317 Acidobact Acidobacteria_Gp2 Gp2                 | 0 | 0 | 0 | 0 | 0 | 0 | 0 | 1 | 0 | 0 | 0 | 0 | 1 |
| Cluster25318 Acidobact Acidobacteria_Gp3 Bryobacter          | 0 | 0 | 0 | 0 | 1 | 0 | 0 | 0 | 0 | 0 | 0 | 0 | 1 |
| Cluster25325 Proteobac Alphap Alphaproteob Rhizomicrobiu     | 0 | 0 | 0 | 0 | 0 | 0 | 0 | 1 | 0 | 0 | 0 | 0 | 1 |
| Cluster25330 Proteobac Gamm Xantl Sinobac Steroidobacter     | 0 | 0 | 0 | 0 | 0 | 0 | 0 | 1 | 0 | 0 | 0 | 0 | 1 |
| Cluster25333 Chloroflex Ktedor Ktedc Ktedonc Ktedonobacter   | 0 | 0 | 0 | 0 | 0 | 0 | 0 | 0 | 0 | 0 | 0 | 1 | 1 |
| Cluster25350 Acidobact Acidobacteria_Gp13 Gp13               | 0 | 0 | 0 | 0 | 0 | 0 | 1 | 0 | 0 | 0 | 0 | 0 | 1 |
| Cluster25351 Acidobact Acidobacteria_Gp1                     | 0 | 0 | 0 | 0 | 0 | 0 | 0 | 1 | 0 | 0 | 0 | 0 | 1 |
| Cluster25360 Acidobact Acidobacteria_Gp3 Gp3                 | 0 | 0 | 0 | 0 | 0 | 1 | 0 | 0 | 0 | 0 | 0 | 0 | 1 |
| Cluster25362 Bacteroid Sphing Sphir Sphingo Solitalea        | 0 | 0 | 0 | 1 | 0 | 0 | 0 | 0 | 0 | 0 | 0 | 0 | 1 |
| Cluster25364 Chloroflex Ktedor Ktedonobacterales             | 0 | 0 | 0 | 0 | 0 | 0 | 0 | 0 | 1 | 0 | 0 | 0 | 1 |
| Cluster25380 Proteobac Alphaproteobacteria                   | 0 | 0 | 0 | 0 | 0 | 0 | 0 | 1 | 0 | 0 | 0 | 0 | 1 |
| Cluster25394 Chloroflex Ktedor Ktedonobacterales             | 0 | 0 | 0 | 0 | 0 | 0 | 0 | 0 | 0 | 0 | 1 | 0 | 1 |
| Cluster25396 Acidobact Acidobacteria_Gp17 Gp17               | 0 | 0 | 0 | 1 | 0 | 0 | 0 | 0 | 0 | 0 | 0 | 0 | 1 |
| Cluster25397 Acidobact Acidobacteria_Gp3                     | 0 | 0 | 0 | 0 | 0 | 0 | 0 | 0 | 0 | 0 | 0 | 1 | 1 |
| Cluster25410 Bacteroid Sphing Sphir Sphingo Pedobacter       | 0 | 0 | 0 | 0 | 1 | 0 | 0 | 0 | 0 | 0 | 0 | 0 | 1 |
| Cluster25411 Acidobact Acidobacteria_Gp2 Gp2                 | 0 | 0 | 1 | 0 | 0 | 0 | 0 | 0 | 0 | 0 | 0 | 0 | 1 |
| Cluster25412 Actinobac Actinol Actinomycetales               | 0 | 0 | 0 | 0 | 0 | 0 | 1 | 0 | 0 | 0 | 0 | 0 | 1 |
| Cluster25417 Bacteroid Bacteroidetes_incert Ohtaekwangia     | 0 | 0 | 0 | 0 | 0 | 0 | 1 | 0 | 0 | 0 | 0 | 0 | 1 |
| Cluster25423;size=1                                          | 0 | 0 | 0 | 0 | 0 | 0 | 0 | 1 | 0 | 0 | 0 | 0 | 1 |
| Cluster25425 Proteobac Alphaproteobacteria                   | 0 | 0 | 0 | 0 | 0 | 0 | 0 | 1 | 0 | 0 | 0 | 0 | 1 |









|                                                              |   |   |   |   |   |   |   |   |   |   |   |   |   |
|--------------------------------------------------------------|---|---|---|---|---|---|---|---|---|---|---|---|---|
| Cluster25910 Proteobac Gamm Legio Coxiella Aquicella         | 0 | 0 | 0 | 0 | 0 | 0 | 0 | 0 | 1 | 0 | 0 | 0 | 1 |
| Cluster25913 Acidobact Acidobacteria_Gp3                     | 0 | 0 | 0 | 1 | 0 | 0 | 0 | 0 | 0 | 0 | 0 | 0 | 1 |
| Cluster25914 Acidobact Acidobacteria_Gp5 Gp5                 | 0 | 1 | 0 | 0 | 0 | 0 | 0 | 0 | 0 | 0 | 0 | 0 | 1 |
| Cluster25920 Acidobact Acidobacteria_Gp2 Gp2                 | 0 | 1 | 0 | 0 | 0 | 0 | 0 | 0 | 0 | 0 | 0 | 0 | 1 |
| Cluster25921 Acidobacteria                                   | 0 | 0 | 0 | 0 | 0 | 0 | 0 | 0 | 1 | 0 | 0 | 0 | 1 |
| Cluster25936 Proteobac Alphap Caulc Caulobæ Phenyllobacter   | 0 | 0 | 0 | 0 | 0 | 0 | 0 | 0 | 0 | 0 | 1 | 0 | 1 |
| Cluster25942 Actinobac Actinol Actinomycetales               | 0 | 0 | 0 | 1 | 0 | 0 | 0 | 0 | 0 | 0 | 0 | 0 | 1 |
| Cluster25960 Gemmatir Gemm Gemı Gemma Gemmatimonæ            | 1 | 0 | 0 | 0 | 0 | 0 | 0 | 0 | 0 | 0 | 0 | 0 | 1 |
| Cluster25964 Proteobac Alphap Caulc Caulobæ Asticcacaulis    | 0 | 0 | 1 | 0 | 0 | 0 | 0 | 0 | 0 | 0 | 0 | 0 | 1 |
| Cluster25967 Proteobac Gamm Legio Coxiella Aquicella         | 0 | 0 | 0 | 1 | 0 | 0 | 0 | 0 | 0 | 0 | 0 | 0 | 1 |
| Cluster25970 Proteobac Alphap Rhod Acetobacteraceae          | 0 | 0 | 1 | 0 | 0 | 0 | 0 | 0 | 0 | 0 | 0 | 0 | 1 |
| Cluster25972 Proteobac Gammaproteobacteria                   | 0 | 0 | 0 | 0 | 0 | 0 | 0 | 0 | 0 | 1 | 0 | 0 | 1 |
| Cluster25979 Proteobac Deltaproteobacteria                   | 0 | 0 | 0 | 0 | 1 | 0 | 0 | 0 | 0 | 0 | 0 | 0 | 1 |
| Cluster25983 Bacteroid Sphing Sphir Chitinoꞑ Ferruginibacte  | 0 | 0 | 0 | 1 | 0 | 0 | 0 | 0 | 0 | 0 | 0 | 0 | 1 |
| Cluster25987 Proteobac Betaproteobacteria                    | 0 | 0 | 0 | 0 | 1 | 0 | 0 | 0 | 0 | 0 | 0 | 0 | 1 |
| Cluster25988 Bacteroid Sphing Sphir Chitinophagaceae         | 0 | 0 | 0 | 1 | 0 | 0 | 0 | 0 | 0 | 0 | 0 | 0 | 1 |
| Cluster25991;size=7                                          | 0 | 0 | 0 | 0 | 0 | 0 | 0 | 0 | 1 | 0 | 0 | 0 | 1 |
| Cluster26000 Bacteroid Sphing Sphir Chitinoꞑ Sediminibacteri | 1 | 0 | 0 | 0 | 0 | 0 | 0 | 0 | 0 | 0 | 0 | 0 | 1 |
| Cluster26001 Chloroflex Ktedor Ktedonobacterales             | 0 | 0 | 0 | 0 | 0 | 0 | 0 | 0 | 0 | 0 | 1 | 0 | 1 |
| Cluster26010 Acidobact Acidobacteria_Gp1                     | 0 | 0 | 0 | 0 | 0 | 0 | 1 | 0 | 0 | 0 | 0 | 0 | 1 |
| Cluster26015 Proteobac Alphap Rhod Acetobacteraceae          | 0 | 0 | 0 | 0 | 0 | 0 | 0 | 0 | 0 | 0 | 1 | 0 | 1 |
| Cluster26016 Proteobac Alphaproteobacteria                   | 0 | 0 | 0 | 1 | 0 | 0 | 0 | 0 | 0 | 0 | 0 | 0 | 1 |
| Cluster26018 Proteobac Gammaproteobacteria                   | 1 | 0 | 0 | 0 | 0 | 0 | 0 | 0 | 0 | 0 | 0 | 0 | 1 |
| Cluster26019 Proteobac Alphap Rhizobiales                    | 0 | 0 | 0 | 1 | 0 | 0 | 0 | 0 | 0 | 0 | 0 | 0 | 1 |
| Cluster26023 Proteobacteria                                  | 1 | 0 | 0 | 0 | 0 | 0 | 0 | 0 | 0 | 0 | 0 | 0 | 1 |
| Cluster26027 Proteobac Gamm Pseuı Pseudoı Pseudomonas        | 0 | 0 | 0 | 0 | 1 | 0 | 0 | 0 | 0 | 0 | 0 | 0 | 1 |
| Cluster26029 Proteobac Alphap Rhizobiales                    | 0 | 0 | 0 | 0 | 0 | 0 | 0 | 0 | 1 | 0 | 0 | 0 | 1 |
| Cluster26030 Proteobac Alphap Rhizobiales                    | 0 | 0 | 0 | 1 | 0 | 0 | 0 | 0 | 0 | 0 | 0 | 0 | 1 |
| Cluster26031;size=1                                          | 0 | 0 | 0 | 0 | 0 | 0 | 0 | 0 | 0 | 0 | 1 | 0 | 1 |













|                                                            |   |   |   |   |   |   |   |   |   |   |   |   |   |
|------------------------------------------------------------|---|---|---|---|---|---|---|---|---|---|---|---|---|
| Cluster26876 Actinobac Actinol Actinomycetales             | 0 | 0 | 0 | 0 | 0 | 0 | 0 | 0 | 0 | 0 | 1 | 0 | 1 |
| Cluster26877;size=2                                        | 0 | 0 | 0 | 1 | 0 | 0 | 0 | 0 | 0 | 0 | 0 | 0 | 1 |
| Cluster26879 Actinobac Actinol Actinomycetales             | 0 | 0 | 0 | 0 | 0 | 0 | 0 | 1 | 0 | 0 | 0 | 0 | 1 |
| Cluster26882 Bacteroid Sphing Sphir Chitino; Segetibacter  | 0 | 0 | 0 | 0 | 1 | 0 | 0 | 0 | 0 | 0 | 0 | 0 | 1 |
| Cluster26884 Proteobac Alphap Caulc Caulobacteraceae       | 0 | 0 | 0 | 1 | 0 | 0 | 0 | 0 | 0 | 0 | 0 | 0 | 1 |
| Cluster26887 Proteobac Betapr Burkholderiales              | 0 | 0 | 0 | 0 | 1 | 0 | 0 | 0 | 0 | 0 | 0 | 0 | 1 |
| Cluster26888 Acidobact Acidobacteria_Gp1                   | 0 | 0 | 0 | 0 | 0 | 0 | 1 | 0 | 0 | 0 | 0 | 0 | 1 |
| Cluster26901 Bacteroid Sphing Sphir Sphingo Mucilaginicact | 0 | 0 | 0 | 0 | 0 | 0 | 0 | 0 | 0 | 1 | 0 | 0 | 1 |
| Cluster26902 Acidobact Acidobacteria_Gp1 Gp1               | 1 | 0 | 0 | 0 | 0 | 0 | 0 | 0 | 0 | 0 | 0 | 0 | 1 |
| Cluster26909 Acidobact Acidobacteria_Gp2 Gp2               | 0 | 0 | 0 | 1 | 0 | 0 | 0 | 0 | 0 | 0 | 0 | 0 | 1 |
| Cluster26917 Bacteroid Sphing Sphir Chitinophagaceae       | 0 | 0 | 0 | 0 | 1 | 0 | 0 | 0 | 0 | 0 | 0 | 0 | 1 |
| Cluster26921 Actinobac Actinol Actin Actinos; Actinospica  | 0 | 0 | 0 | 0 | 0 | 0 | 1 | 0 | 0 | 0 | 0 | 0 | 1 |
| Cluster26930 Actinobac Actinobacteria                      | 0 | 0 | 0 | 0 | 0 | 0 | 0 | 1 | 0 | 0 | 0 | 0 | 1 |
| Cluster26943 Proteobac Alphap Ricke Ricketts Orientia      | 0 | 0 | 0 | 0 | 0 | 0 | 0 | 0 | 0 | 0 | 0 | 1 | 1 |
| Cluster26944 Acidobact Acidobacteria_Gp2 Gp2               | 0 | 0 | 0 | 0 | 1 | 0 | 0 | 0 | 0 | 0 | 0 | 0 | 1 |
| Cluster26949 Acidobact Acidobacteria_Gp2 Gp2               | 0 | 0 | 0 | 0 | 1 | 0 | 0 | 0 | 0 | 0 | 0 | 0 | 1 |
| Cluster26955 Proteobac Alphap Alphaproteob; Rhizomicrobiu  | 0 | 0 | 0 | 1 | 0 | 0 | 0 | 0 | 0 | 0 | 0 | 0 | 1 |
| Cluster26959 Acidobact Acidobacteria_Gp6 Gp6               | 0 | 0 | 0 | 0 | 1 | 0 | 0 | 0 | 0 | 0 | 0 | 0 | 1 |
| Cluster26964 Proteobac Alphap Caulc Caulob; Phenylobacter  | 0 | 0 | 0 | 0 | 0 | 1 | 0 | 0 | 0 | 0 | 0 | 0 | 1 |
| Cluster26967 Proteobac Deltap Myxococcales                 | 0 | 0 | 0 | 0 | 1 | 0 | 0 | 0 | 0 | 0 | 0 | 0 | 1 |
| Cluster26970 Acidobact Acidobacteria_Gp2 Gp2               | 0 | 0 | 0 | 1 | 0 | 0 | 0 | 0 | 0 | 0 | 0 | 0 | 1 |
| Cluster26974 Actinobac Actinol Actinomycetales             | 0 | 0 | 0 | 0 | 0 | 0 | 0 | 0 | 0 | 0 | 1 | 0 | 1 |
| Cluster26975 Proteobac Alphaproteobacteria                 | 0 | 0 | 0 | 0 | 0 | 0 | 0 | 0 | 0 | 1 | 0 | 0 | 1 |
| Cluster26983 Actinobac Actinobacteria                      | 0 | 0 | 0 | 1 | 0 | 0 | 0 | 0 | 0 | 0 | 0 | 0 | 1 |
| Cluster26992 Bacteroid Sphing Sphir Chitino; Terrimonas    | 0 | 0 | 0 | 0 | 0 | 0 | 0 | 0 | 0 | 0 | 0 | 1 | 1 |
| Cluster26998 Proteobac Gammaproteobacteria                 | 0 | 0 | 0 | 1 | 0 | 0 | 0 | 0 | 0 | 0 | 0 | 0 | 1 |
| Cluster27004 Bacteroid Sphing Sphir Chitinophagaceae       | 0 | 0 | 0 | 0 | 0 | 0 | 0 | 1 | 0 | 0 | 0 | 0 | 1 |
| Cluster27016 Acidobact Acidobacteria_Gp13 Gp13             | 1 | 0 | 0 | 0 | 0 | 0 | 0 | 0 | 0 | 0 | 0 | 0 | 1 |
| Cluster27020 Proteobac Betapr Burkl Oxalobacteraceae       | 0 | 0 | 0 | 0 | 0 | 0 | 0 | 1 | 0 | 0 | 0 | 0 | 1 |







|                     |            |                     |                 |                  |                |         |   |   |   |   |   |   |   |   |   |   |   |   |   |
|---------------------|------------|---------------------|-----------------|------------------|----------------|---------|---|---|---|---|---|---|---|---|---|---|---|---|---|
| Cluster27329        | Bacteroid  | Sphing              | Sphir           | Sphingo          | Mucilag        | inibact | 0 | 0 | 0 | 0 | 0 | 0 | 0 | 0 | 0 | 1 | 0 | 1 |   |
| Cluster27331        | Bacteroid  | Sphing              | Sphir           | Chitinophagaceae |                |         | 0 | 0 | 0 | 0 | 0 | 1 | 0 | 0 | 0 | 0 | 0 | 1 |   |
| Cluster27340        | Acidobact  | Acidobacteria_Gp2   | Gp2             |                  |                |         | 0 | 0 | 1 | 0 | 0 | 0 | 0 | 0 | 0 | 0 | 0 | 1 |   |
| Cluster27341        | Proteobac  | Alphaproteobacteria |                 |                  |                |         | 0 | 0 | 0 | 0 | 1 | 0 | 0 | 0 | 0 | 0 | 0 | 1 |   |
| Cluster27344        | Bacteroid  | Sphing              | Sphir           | Chitino          | Ferruginibacte |         | 0 | 0 | 0 | 0 | 0 | 0 | 0 | 0 | 0 | 0 | 1 | 1 |   |
| Cluster27346        | Nitrospira | Nitros              | Nitro           | Nitrospi         | Nitrospira     |         | 0 | 0 | 0 | 0 | 0 | 0 | 1 | 0 | 0 | 0 | 0 | 1 |   |
| Cluster27349        | Verrucom   | Spartobacteria      | Spartobacteria  |                  |                |         | 0 | 0 | 0 | 1 | 0 | 0 | 0 | 0 | 0 | 0 | 0 | 1 |   |
| Cluster27353        | Proteobac  | Gamm                | Xantl           | Sinobac          | Steroidobacter |         | 0 | 0 | 0 | 0 | 0 | 0 | 1 | 0 | 0 | 0 | 0 | 1 |   |
| Cluster27356        | TM7        |                     |                 | TM7_genera_i     |                |         | 0 | 0 | 0 | 0 | 0 | 0 | 0 | 1 | 0 | 0 | 0 | 1 |   |
| Cluster27358        | Acidobact  | Acidobacteria_Gp1   | Gp1             |                  |                |         | 0 | 0 | 0 | 0 | 0 | 0 | 1 | 0 | 0 | 0 | 0 | 1 |   |
| Cluster27361;size=1 |            |                     |                 |                  |                |         | 0 | 0 | 0 | 0 | 0 | 0 | 0 | 0 | 1 | 0 | 0 | 1 |   |
| Cluster27375;size=1 |            |                     |                 |                  |                |         | 0 | 0 | 1 | 0 | 0 | 0 | 0 | 0 | 0 | 0 | 0 | 1 |   |
| Cluster27376        | Proteobac  | Gamm                | Pseudomonadales |                  |                |         | 0 | 0 | 0 | 0 | 0 | 0 | 0 | 0 | 0 | 0 | 1 | 0 | 1 |
| Cluster27383        | Acidobact  | Acidobacteria_Gp2   | Gp2             |                  |                |         | 0 | 0 | 0 | 0 | 0 | 0 | 1 | 0 | 0 | 0 | 0 | 1 |   |
| Cluster27387        | Acidobact  | Acidobacteria_Gp2   | Gp2             |                  |                |         | 0 | 0 | 0 | 0 | 0 | 0 | 0 | 0 | 0 | 0 | 1 | 1 |   |
| Cluster27388;size=3 |            |                     |                 |                  |                |         | 0 | 0 | 0 | 0 | 0 | 0 | 0 | 0 | 0 | 1 | 0 | 1 |   |
| Cluster27395        | Acidobact  | Acidobacteria_Gp3   | Gp3             |                  |                |         | 0 | 0 | 0 | 0 | 0 | 0 | 0 | 0 | 0 | 0 | 1 | 1 |   |
| Cluster27406;size=1 |            |                     |                 |                  |                |         | 0 | 0 | 1 | 0 | 0 | 0 | 0 | 0 | 0 | 0 | 0 | 1 |   |
| Cluster27407;size=2 |            |                     |                 |                  |                |         | 0 | 0 | 0 | 0 | 0 | 0 | 1 | 0 | 0 | 0 | 0 | 1 |   |
| Cluster27408;size=1 |            |                     |                 |                  |                |         | 0 | 0 | 0 | 0 | 0 | 0 | 0 | 1 | 0 | 0 | 0 | 1 |   |
| Cluster27410        | Proteobac  | Gammaproteobacteria |                 |                  |                |         | 0 | 0 | 0 | 0 | 0 | 0 | 0 | 0 | 0 | 0 | 0 | 1 | 1 |
| Cluster27411        | Proteobac  | Alphaproteobacteria |                 |                  |                |         | 0 | 0 | 1 | 0 | 0 | 0 | 0 | 0 | 0 | 0 | 0 | 1 |   |
| Cluster27420        | Bacteroid  | Sphing              | Sphir           | Chitinophagaceae |                |         | 0 | 0 | 0 | 0 | 0 | 0 | 1 | 0 | 0 | 0 | 0 | 1 |   |
| Cluster27422;size=1 |            |                     |                 |                  |                |         | 0 | 0 | 1 | 0 | 0 | 0 | 0 | 0 | 0 | 0 | 0 | 1 |   |
| Cluster27439        | Actinobac  | Actinol             | Actin           | Actinos          | Actinospica    |         | 0 | 0 | 0 | 0 | 0 | 0 | 0 | 0 | 0 | 0 | 0 | 1 | 1 |
| Cluster27441        | Proteobac  | Alphap              | Caulc           | Caulob           | Phenylobacter  |         | 0 | 0 | 1 | 0 | 0 | 0 | 0 | 0 | 0 | 0 | 0 | 1 |   |
| Cluster27442        | Acidobact  | Acidobacteria_Gp1   |                 |                  |                |         | 0 | 0 | 0 | 0 | 0 | 0 | 1 | 0 | 0 | 0 | 0 | 1 |   |
| Cluster27444        | Actinobac  | Actinol             | Actinomycetales |                  |                |         | 0 | 0 | 0 | 0 | 0 | 0 | 0 | 0 | 0 | 0 | 1 | 1 |   |
| Cluster27445        | Acidobact  | Acidobacteria_Gp13  | Gp13            |                  |                |         | 0 | 0 | 0 | 0 | 0 | 0 | 0 | 0 | 1 | 0 | 0 | 1 |   |

|                                                              |   |   |   |   |   |   |   |   |   |   |   |   |   |
|--------------------------------------------------------------|---|---|---|---|---|---|---|---|---|---|---|---|---|
| Cluster27448 Bacteroid Sphing Sphir Chitinoꝝ Segetibacter    | 0 | 0 | 0 | 0 | 0 | 0 | 1 | 0 | 0 | 0 | 0 | 0 | 1 |
| Cluster27451 Acidobact Acidobacteria_Gp13 Gp13               | 0 | 0 | 0 | 0 | 0 | 0 | 1 | 0 | 0 | 0 | 0 | 0 | 1 |
| Cluster27457 Bacteroid Sphing Sphir Chitinophagaceae         | 0 | 0 | 1 | 0 | 0 | 0 | 0 | 0 | 0 | 0 | 0 | 0 | 1 |
| Cluster27472 Acidobact Acidobacteria_Gp7 Gp7                 | 0 | 0 | 1 | 0 | 0 | 0 | 0 | 0 | 0 | 0 | 0 | 0 | 1 |
| Cluster27474 Actinobac Actinol Actinomycetales               | 0 | 0 | 0 | 0 | 0 | 0 | 1 | 0 | 0 | 0 | 0 | 0 | 1 |
| Cluster27475 Verrucom Spartobacteria Spartobacteria          | 0 | 0 | 1 | 0 | 0 | 0 | 0 | 0 | 0 | 0 | 0 | 0 | 1 |
| Cluster27494 Bacteroid Sphing Sphir Chitinophagaceae         | 0 | 0 | 1 | 0 | 0 | 0 | 0 | 0 | 0 | 0 | 0 | 0 | 1 |
| Cluster27497 Acidobact Acidobacteria_Gp13 Gp13               | 0 | 0 | 0 | 0 | 0 | 0 | 1 | 0 | 0 | 0 | 0 | 0 | 1 |
| Cluster27499 Acidobact Acidobacteria_Gp1                     | 0 | 0 | 0 | 0 | 0 | 1 | 0 | 0 | 0 | 0 | 0 | 0 | 1 |
| Cluster27508;size=3                                          | 0 | 0 | 1 | 0 | 0 | 0 | 0 | 0 | 0 | 0 | 0 | 0 | 1 |
| Cluster27510;size=3                                          | 0 | 0 | 1 | 0 | 0 | 0 | 0 | 0 | 0 | 0 | 0 | 0 | 1 |
| Cluster27515 Proteobac Alphap Rhod Acetobac Acidisphaera     | 0 | 0 | 0 | 1 | 0 | 0 | 0 | 0 | 0 | 0 | 0 | 0 | 1 |
| Cluster27520;size=1                                          | 0 | 0 | 0 | 0 | 0 | 0 | 0 | 0 | 1 | 0 | 0 | 0 | 1 |
| Cluster27529 Actinobac Actinol Actinomycetales               | 0 | 0 | 0 | 0 | 0 | 0 | 1 | 0 | 0 | 0 | 0 | 0 | 1 |
| Cluster27545 Acidobact Acidobacteria_Gp2 Gp2                 | 0 | 0 | 0 | 0 | 0 | 0 | 1 | 0 | 0 | 0 | 0 | 0 | 1 |
| Cluster27550 Proteobac Gamm Xantf Sinobac Steroidobacter     | 0 | 0 | 0 | 0 | 0 | 0 | 1 | 0 | 0 | 0 | 0 | 0 | 1 |
| Cluster27551 Proteobac Gamm Xantf Sinobac Steroidobacter     | 0 | 0 | 1 | 0 | 0 | 0 | 0 | 0 | 0 | 0 | 0 | 0 | 1 |
| Cluster27552 Verrucom Opituta Opituta Opituta Opitutus       | 0 | 0 | 0 | 0 | 0 | 0 | 0 | 0 | 0 | 0 | 0 | 1 | 1 |
| Cluster27580 Actinobac Actinol Actinomycetales               | 0 | 0 | 0 | 0 | 0 | 0 | 0 | 0 | 0 | 0 | 1 | 0 | 1 |
| Cluster27581 Chloroflex Ktedon Ktedon Ktedon Ktedonobacter   | 0 | 0 | 0 | 0 | 0 | 0 | 0 | 1 | 0 | 0 | 0 | 0 | 1 |
| Cluster27585 Bacteroid Sphing Sphir Chitinoꝝ Ferruginibacter | 0 | 0 | 0 | 0 | 0 | 0 | 1 | 0 | 0 | 0 | 0 | 0 | 1 |
| Cluster27592 Firmicutes                                      | 0 | 0 | 0 | 0 | 0 | 0 | 0 | 0 | 0 | 0 | 0 | 1 | 1 |
| Cluster27600 Acidobact Acidobacteria_Gp3 Gp3                 | 0 | 0 | 0 | 1 | 0 | 0 | 0 | 0 | 0 | 0 | 0 | 0 | 1 |
| Cluster27603 Acidobact Acidobacteria_Gp3 Bryobacter          | 0 | 0 | 0 | 0 | 0 | 0 | 1 | 0 | 0 | 0 | 0 | 0 | 1 |
| Cluster27605 Actinobac Actinol Solirf Conexib Conexibacter   | 0 | 0 | 1 | 0 | 0 | 0 | 0 | 0 | 0 | 0 | 0 | 0 | 1 |
| Cluster27606 Proteobac Alphap Alphaproteob Rhizomicrobiu     | 0 | 0 | 0 | 0 | 0 | 0 | 1 | 0 | 0 | 0 | 0 | 0 | 1 |
| Cluster27618 Bacteroid Sphing Sphir Chitinophagaceae         | 0 | 0 | 1 | 0 | 0 | 0 | 0 | 0 | 0 | 0 | 0 | 0 | 1 |
| Cluster27621 Chloroflex Ktedon Ktedon Ktedon Ktedonobacter   | 0 | 0 | 0 | 1 | 0 | 0 | 0 | 0 | 0 | 0 | 0 | 0 | 1 |
| Cluster27623 Acidobact Acidobacteria_Gp3 Bryobacter          | 0 | 0 | 0 | 0 | 0 | 0 | 0 | 0 | 1 | 0 | 0 | 0 | 1 |







|                                                              |   |   |   |   |   |   |   |   |   |   |   |   |   |
|--------------------------------------------------------------|---|---|---|---|---|---|---|---|---|---|---|---|---|
| Cluster28108 Proteobac Alphaproteobacteria                   | 1 | 0 | 0 | 0 | 0 | 0 | 0 | 0 | 0 | 0 | 0 | 0 | 1 |
| Cluster28118 Bacteroid Sphing Sphir Cytophagaceae            | 0 | 0 | 1 | 0 | 0 | 0 | 0 | 0 | 0 | 0 | 0 | 0 | 1 |
| Cluster28119 Actinobac Actinol Acidimicrobiales              | 0 | 0 | 0 | 0 | 0 | 0 | 0 | 0 | 0 | 0 | 1 | 0 | 1 |
| Cluster28124 Proteobac Alphap Alphaproteobact Rhizomicrobiu  | 0 | 1 | 0 | 0 | 0 | 0 | 0 | 0 | 0 | 0 | 0 | 0 | 1 |
| Cluster28132 Actinobac Actinol Actin Catenul Catenulispora   | 0 | 0 | 0 | 0 | 0 | 0 | 0 | 1 | 0 | 0 | 0 | 0 | 1 |
| Cluster28143 Actinobac Actinol Acidimicrobiales              | 0 | 0 | 1 | 0 | 0 | 0 | 0 | 0 | 0 | 0 | 0 | 0 | 1 |
| Cluster28147 Proteobac Alphap Rhizc Bradyrh Agromonas        | 0 | 0 | 0 | 0 | 0 | 0 | 0 | 0 | 0 | 0 | 1 | 0 | 1 |
| Cluster28149;size=2                                          | 0 | 0 | 0 | 0 | 0 | 0 | 1 | 0 | 0 | 0 | 0 | 0 | 1 |
| Cluster28162 Bacteroidetes                                   | 0 | 0 | 0 | 1 | 0 | 0 | 0 | 0 | 0 | 0 | 0 | 0 | 1 |
| Cluster28163 Acidobact Acidobacteria_Gp2 Gp2                 | 0 | 0 | 0 | 0 | 0 | 0 | 0 | 1 | 0 | 0 | 0 | 0 | 1 |
| Cluster28178 Actinobac Actinol Actin Mycoba Mycobacteriur    | 0 | 0 | 1 | 0 | 0 | 0 | 0 | 0 | 0 | 0 | 0 | 0 | 1 |
| Cluster28186;size=4                                          | 0 | 0 | 0 | 1 | 0 | 0 | 0 | 0 | 0 | 0 | 0 | 0 | 1 |
| Cluster28190 Acidobact Acidobacteria_Gp3 Gp3                 | 0 | 0 | 1 | 0 | 0 | 0 | 0 | 0 | 0 | 0 | 0 | 0 | 1 |
| Cluster28193 Proteobac Alphap Rhizc Bradyrhizobiaceae        | 0 | 0 | 1 | 0 | 0 | 0 | 0 | 0 | 0 | 0 | 0 | 0 | 1 |
| Cluster28196 Proteobac Alphaproteobacteria                   | 0 | 0 | 1 | 0 | 0 | 0 | 0 | 0 | 0 | 0 | 0 | 0 | 1 |
| Cluster28204 Actinobac Actinol Actinomycetales               | 0 | 0 | 0 | 0 | 0 | 0 | 0 | 0 | 1 | 0 | 0 | 0 | 1 |
| Cluster28206;size=1                                          | 0 | 0 | 1 | 0 | 0 | 0 | 0 | 0 | 0 | 0 | 0 | 0 | 1 |
| Cluster28207 Proteobac Gammaproteobacteria                   | 0 | 0 | 0 | 0 | 0 | 0 | 1 | 0 | 0 | 0 | 0 | 0 | 1 |
| Cluster28208 Proteobac Alphaproteobacteria                   | 0 | 0 | 1 | 0 | 0 | 0 | 0 | 0 | 0 | 0 | 0 | 0 | 1 |
| Cluster28210;size=2                                          | 0 | 0 | 0 | 0 | 0 | 0 | 1 | 0 | 0 | 0 | 0 | 0 | 1 |
| Cluster28212 Proteobac Gamm Xantl Sinobac Steroidobacter     | 0 | 0 | 0 | 0 | 0 | 0 | 0 | 1 | 0 | 0 | 0 | 0 | 1 |
| Cluster28232;size=4                                          | 0 | 0 | 0 | 0 | 0 | 0 | 0 | 1 | 0 | 0 | 0 | 0 | 1 |
| Cluster28233 Proteobac Gamm Legio Coxiella Coxiella          | 0 | 0 | 1 | 0 | 0 | 0 | 0 | 0 | 0 | 0 | 0 | 0 | 1 |
| Cluster28237 Proteobac Alphaproteobacteria                   | 0 | 0 | 0 | 0 | 0 | 1 | 0 | 0 | 0 | 0 | 0 | 0 | 1 |
| Cluster28238 Actinobac Actinol Acidi Acidimii Aciditerrimona | 0 | 0 | 0 | 0 | 0 | 0 | 0 | 0 | 0 | 0 | 1 | 0 | 1 |
| Cluster28248 Proteobac Betaproteobacteria                    | 0 | 0 | 0 | 0 | 0 | 1 | 0 | 0 | 0 | 0 | 0 | 0 | 1 |
| Cluster28250 Proteobacteria                                  | 0 | 0 | 0 | 1 | 0 | 0 | 0 | 0 | 0 | 0 | 0 | 0 | 1 |
| Cluster28270 Actinobac Actinol Acidi Acidimii Aciditerrimona | 0 | 0 | 0 | 1 | 0 | 0 | 0 | 0 | 0 | 0 | 0 | 0 | 1 |
| Cluster28275;size=4                                          | 0 | 0 | 0 | 0 | 0 | 0 | 0 | 0 | 1 | 0 | 0 | 0 | 1 |







|                                                              |   |   |   |   |   |   |   |   |   |   |   |   |   |
|--------------------------------------------------------------|---|---|---|---|---|---|---|---|---|---|---|---|---|
| Cluster28569 Acidobact Acidobacteria_Gp3                     | 0 | 0 | 0 | 1 | 0 | 0 | 0 | 0 | 0 | 0 | 0 | 0 | 1 |
| Cluster28571;size=1                                          | 0 | 0 | 0 | 0 | 0 | 0 | 0 | 0 | 0 | 0 | 1 | 0 | 1 |
| Cluster28574;size=1                                          | 0 | 0 | 0 | 1 | 0 | 0 | 0 | 0 | 0 | 0 | 0 | 0 | 1 |
| Cluster28589 Proteobac Alphap Alphaproteot Rhizomicrobiu     | 0 | 0 | 0 | 0 | 0 | 1 | 0 | 0 | 0 | 0 | 0 | 0 | 1 |
| Cluster28590 Acidobact Acidobacteria_Gp6 Gp6                 | 0 | 0 | 0 | 1 | 0 | 0 | 0 | 0 | 0 | 0 | 0 | 0 | 1 |
| Cluster28596 Acidobacteria                                   | 0 | 0 | 0 | 0 | 0 | 0 | 0 | 0 | 1 | 0 | 0 | 0 | 1 |
| Cluster28598 Actinobac Actinol Acidimicrobiales              | 0 | 0 | 0 | 1 | 0 | 0 | 0 | 0 | 0 | 0 | 0 | 0 | 1 |
| Cluster28601 Proteobac Betapr Burkholderiales                | 0 | 0 | 0 | 0 | 0 | 1 | 0 | 0 | 0 | 0 | 0 | 0 | 1 |
| Cluster28605 Actinobac Actinol Acidi Acidimii Aciditerrimona | 0 | 0 | 0 | 0 | 0 | 0 | 0 | 0 | 0 | 0 | 1 | 0 | 1 |
| Cluster28617 Proteobac Betapr Burkl Comamonadaceae           | 0 | 0 | 0 | 1 | 0 | 0 | 0 | 0 | 0 | 0 | 0 | 0 | 1 |
| Cluster28620 Proteobac Deltap Myxc Cystobacteraceae          | 0 | 0 | 0 | 1 | 0 | 0 | 0 | 0 | 0 | 0 | 0 | 0 | 1 |
| Cluster28621 Acidobact Acidobacteria_Gp3                     | 0 | 0 | 0 | 0 | 0 | 0 | 0 | 0 | 0 | 0 | 1 | 0 | 1 |
| Cluster28636 Bacteroidetes                                   | 0 | 0 | 0 | 0 | 0 | 1 | 0 | 0 | 0 | 0 | 0 | 0 | 1 |
| Cluster28641 Bacteroid Sphing Sphir Chitinophagaceae         | 0 | 0 | 0 | 1 | 0 | 0 | 0 | 0 | 0 | 0 | 0 | 0 | 1 |
| Cluster28642 Acidobact Acidobacteria_Gp2 Gp2                 | 0 | 0 | 0 | 1 | 0 | 0 | 0 | 0 | 0 | 0 | 0 | 0 | 1 |
| Cluster28649 Bacteroid Sphing Sphir Chitinophagaceae         | 0 | 0 | 1 | 0 | 0 | 0 | 0 | 0 | 0 | 0 | 0 | 0 | 1 |
| Cluster28653 Acidobact Acidobacteria_Gp6 Gp6                 | 0 | 0 | 0 | 0 | 0 | 0 | 1 | 0 | 0 | 0 | 0 | 0 | 1 |
| Cluster28672 Proteobac Alphap Rhizc Xantho Pseudolabrys      | 0 | 0 | 1 | 0 | 0 | 0 | 0 | 0 | 0 | 0 | 0 | 0 | 1 |
| Cluster28673 Actinobac Actinol Acidimicrobiales              | 0 | 0 | 0 | 0 | 0 | 0 | 0 | 1 | 0 | 0 | 0 | 0 | 1 |
| Cluster28679 Actinobac Actinol Actinomycetales               | 0 | 0 | 0 | 0 | 0 | 0 | 1 | 0 | 0 | 0 | 0 | 0 | 1 |
| Cluster28683 Acidobact Acidobacteria_Gp1 Edaphobacter        | 0 | 0 | 0 | 0 | 0 | 0 | 1 | 0 | 0 | 0 | 0 | 0 | 1 |
| Cluster28688 Bacteroid Sphing Sphir Chitinophagaceae         | 0 | 0 | 0 | 0 | 0 | 0 | 0 | 0 | 0 | 0 | 0 | 1 | 1 |
| Cluster28699 Proteobac Betapr Burkl Burkhol Burkholderia     | 0 | 0 | 0 | 0 | 0 | 0 | 0 | 0 | 0 | 0 | 1 | 0 | 1 |
| Cluster28700 Proteobac Gamm Xantl Xantho Rhodanobacte        | 0 | 0 | 0 | 0 | 0 | 0 | 1 | 0 | 0 | 0 | 0 | 0 | 1 |
| Cluster28701 Chloroflex Ktedo Ktedo Ktedon Ktedonobacter     | 0 | 0 | 0 | 0 | 0 | 0 | 0 | 1 | 0 | 0 | 0 | 0 | 1 |
| Cluster28704 Proteobac Gamm Xantl Sinobacteraceae            | 0 | 0 | 0 | 0 | 0 | 0 | 0 | 0 | 0 | 0 | 0 | 1 | 1 |
| Cluster28712 Proteobac Betaproteobacteria                    | 0 | 0 | 1 | 0 | 0 | 0 | 0 | 0 | 0 | 0 | 0 | 0 | 1 |
| Cluster28713 Bacteroid Sphing Sphir Sphingo Mucilaginibact   | 0 | 0 | 0 | 0 | 0 | 0 | 0 | 1 | 0 | 0 | 0 | 0 | 1 |
| Cluster28715 Actinobac Actinol Actinomycetales               | 0 | 0 | 0 | 0 | 0 | 0 | 1 | 0 | 0 | 0 | 0 | 0 | 1 |









|                                                            |   |   |   |   |   |   |   |   |   |   |   |   |   |
|------------------------------------------------------------|---|---|---|---|---|---|---|---|---|---|---|---|---|
| Cluster29495 Bacteroid Sphing Sphir Chitinophagaceae       | 0 | 0 | 0 | 1 | 0 | 0 | 0 | 0 | 0 | 0 | 0 | 0 | 1 |
| Cluster29501 Acidobact Acidobacteria_Gp1                   | 0 | 0 | 1 | 0 | 0 | 0 | 0 | 0 | 0 | 0 | 0 | 0 | 1 |
| Cluster29505 Actinobac Actinobacteria                      | 0 | 0 | 0 | 0 | 0 | 0 | 0 | 0 | 0 | 0 | 1 | 0 | 1 |
| Cluster29508 Bacteroid Sphing Sphir Chitinophagaceae       | 0 | 0 | 0 | 1 | 0 | 0 | 0 | 0 | 0 | 0 | 0 | 0 | 1 |
| Cluster29510 Acidobact Acidobacteria_Gp2 Gp2               | 1 | 0 | 0 | 0 | 0 | 0 | 0 | 0 | 0 | 0 | 0 | 0 | 1 |
| Cluster29526 Acidobact Acidobacteria_Gp3                   | 0 | 0 | 0 | 0 | 0 | 0 | 1 | 0 | 0 | 0 | 0 | 0 | 1 |
| Cluster29527 Proteobac Alphap Rhod Acetobac Acidisphaera   | 0 | 0 | 0 | 0 | 1 | 0 | 0 | 0 | 0 | 0 | 0 | 0 | 1 |
| Cluster29530 Actinobac Actinobacteria                      | 0 | 0 | 0 | 0 | 0 | 0 | 1 | 0 | 0 | 0 | 0 | 0 | 1 |
| Cluster29533 Acidobacteria                                 | 0 | 0 | 0 | 0 | 0 | 0 | 1 | 0 | 0 | 0 | 0 | 0 | 1 |
| Cluster29540 Bacteroid Sphing Sphir Sphingo Mucilaginibact | 0 | 1 | 0 | 0 | 0 | 0 | 0 | 0 | 0 | 0 | 0 | 0 | 1 |
| Cluster29542 Acidobact Acidobacteria_Gp3 Gp3               | 0 | 0 | 0 | 0 | 0 | 0 | 0 | 0 | 0 | 1 | 0 | 0 | 1 |
| Cluster29543 Bacteroid Sphing Sphir Sphingo Mucilaginibact | 0 | 0 | 0 | 0 | 0 | 0 | 0 | 0 | 0 | 0 | 0 | 1 | 1 |
| Cluster29544 Proteobac Gamm Xantl Sinobac Steroidobacter   | 0 | 0 | 0 | 0 | 0 | 0 | 1 | 0 | 0 | 0 | 0 | 0 | 1 |
| Cluster29545 Acidobact Acidobacteria_Gp1                   | 1 | 0 | 0 | 0 | 0 | 0 | 0 | 0 | 0 | 0 | 0 | 0 | 1 |
| Cluster29547 Proteobac Alphap Rhod Acetobacteraceae        | 0 | 0 | 0 | 1 | 0 | 0 | 0 | 0 | 0 | 0 | 0 | 0 | 1 |
| Cluster29558 Proteobac Alphap Alphaproteok Rhizomicrobiu   | 0 | 0 | 0 | 0 | 1 | 0 | 0 | 0 | 0 | 0 | 0 | 0 | 1 |
| Cluster29564 Chlorobi                                      | 0 | 0 | 1 | 0 | 0 | 0 | 0 | 0 | 0 | 0 | 0 | 0 | 1 |
| Cluster29575 Bacteroid Sphing Sphir Chitinophagaceae       | 0 | 0 | 1 | 0 | 0 | 0 | 0 | 0 | 0 | 0 | 0 | 0 | 1 |
| Cluster29576 Verrucom Subdivision3 Subdivision3_ξ          | 0 | 0 | 0 | 1 | 0 | 0 | 0 | 0 | 0 | 0 | 0 | 0 | 1 |
| Cluster29581 Proteobac Alphap Rhizobiales                  | 0 | 0 | 0 | 0 | 0 | 0 | 0 | 0 | 0 | 0 | 0 | 1 | 1 |
| Cluster29585 Acidobact Acidobacteria_Gp1                   | 0 | 0 | 1 | 0 | 0 | 0 | 0 | 0 | 0 | 0 | 0 | 0 | 1 |
| Cluster29590 Proteobac Deltap Myxc Kofleria Kofleria       | 0 | 0 | 1 | 0 | 0 | 0 | 0 | 0 | 0 | 0 | 0 | 0 | 1 |
| Cluster29593 Proteobac Betapr Burkl Burkholderiales_incert | 0 | 0 | 1 | 0 | 0 | 0 | 0 | 0 | 0 | 0 | 0 | 0 | 1 |
| Cluster29604 Proteobac Alphap Alphaproteok Rhizomicrobiu   | 0 | 0 | 0 | 0 | 0 | 0 | 0 | 0 | 0 | 0 | 0 | 1 | 1 |
| Cluster29614 Verrucom Opitut:Opit: Opituta Opitutus        | 0 | 0 | 0 | 0 | 0 | 0 | 0 | 0 | 0 | 0 | 0 | 1 | 1 |
| Cluster29615 Proteobac Alphap Rhizc Bradyrhizobiaceae      | 0 | 0 | 0 | 0 | 0 | 0 | 0 | 1 | 0 | 0 | 0 | 0 | 1 |
| Cluster29618 Acidobact Acidobacteria_Gp3 Gp3               | 0 | 0 | 0 | 0 | 0 | 1 | 0 | 0 | 0 | 0 | 0 | 0 | 1 |
| Cluster29621 Proteobac Betapr Burkl Burkhol Burkholderia   | 0 | 0 | 0 | 0 | 0 | 0 | 0 | 1 | 0 | 0 | 0 | 0 | 1 |
| Cluster29625 Planctom: Planct: Planc Planctomycetaceae     | 0 | 0 | 0 | 0 | 0 | 0 | 0 | 0 | 0 | 0 | 1 | 0 | 1 |









|                                                               |   |   |   |   |   |   |   |   |   |   |   |   |   |
|---------------------------------------------------------------|---|---|---|---|---|---|---|---|---|---|---|---|---|
| Cluster30127 Actinobac Actinol Actinomycetales                | 0 | 0 | 0 | 1 | 0 | 0 | 0 | 0 | 0 | 0 | 0 | 0 | 1 |
| Cluster30135 Verrucom Subdivision3 Subdivision3_ε             | 0 | 0 | 0 | 0 | 0 | 0 | 0 | 0 | 0 | 0 | 0 | 1 | 1 |
| Cluster30137 Firmicute: Clostrii Clost Lachnos ClostridiumXIV | 0 | 0 | 0 | 0 | 0 | 1 | 0 | 0 | 0 | 0 | 0 | 0 | 1 |
| Cluster30139 Actinobac Actinol Actinomycetales                | 0 | 1 | 0 | 0 | 0 | 0 | 0 | 0 | 0 | 0 | 0 | 0 | 1 |
| Cluster30142 Proteobac Gammaproteobacteria                    | 0 | 0 | 0 | 0 | 0 | 0 | 0 | 0 | 0 | 0 | 1 | 0 | 1 |
| Cluster30144 Actinobac Actinol Actinomycetales                | 0 | 0 | 0 | 0 | 0 | 0 | 0 | 0 | 0 | 0 | 1 | 0 | 1 |
| Cluster30145 Proteobac Alphap Sphir Sphingomonadaceae         | 0 | 0 | 1 | 0 | 0 | 0 | 0 | 0 | 0 | 0 | 0 | 0 | 1 |
| Cluster30147;size=4                                           | 0 | 0 | 0 | 0 | 1 | 0 | 0 | 0 | 0 | 0 | 0 | 0 | 1 |
| Cluster30149 Proteobac Alphap Rhizobiales                     | 0 | 0 | 0 | 1 | 0 | 0 | 0 | 0 | 0 | 0 | 0 | 0 | 1 |
| Cluster30155 Actinobac Actinol Acidi Acidimi Aciditerrimona   | 0 | 0 | 0 | 0 | 0 | 0 | 0 | 0 | 0 | 1 | 0 | 0 | 1 |
| Cluster30163 Proteobac Alphap Caulc Caulobacteraceae          | 0 | 0 | 0 | 0 | 0 | 0 | 0 | 0 | 0 | 0 | 1 | 0 | 1 |
| Cluster30170 Acidobact Acidobacteria_Gp1                      | 0 | 0 | 0 | 0 | 0 | 0 | 1 | 0 | 0 | 0 | 0 | 0 | 1 |
| Cluster30172 Acidobacteria                                    | 0 | 0 | 0 | 0 | 0 | 0 | 0 | 0 | 0 | 0 | 0 | 1 | 1 |
| Cluster30178 Actinobac Actinol Actinomycetales                | 0 | 0 | 0 | 0 | 0 | 0 | 0 | 0 | 0 | 0 | 1 | 0 | 1 |
| Cluster30179 Planctom Planct Planc Plancto Zavarzinella       | 0 | 0 | 0 | 0 | 0 | 0 | 1 | 0 | 0 | 0 | 0 | 0 | 1 |
| Cluster30191 Actinobac Actinol Actinomycetales                | 0 | 0 | 0 | 0 | 0 | 0 | 0 | 1 | 0 | 0 | 0 | 0 | 1 |
| Cluster30192 Acidobact Acidobacteria_Gp1                      | 0 | 0 | 0 | 1 | 0 | 0 | 0 | 0 | 0 | 0 | 0 | 0 | 1 |
| Cluster30193;size=1                                           | 1 | 0 | 0 | 0 | 0 | 0 | 0 | 0 | 0 | 0 | 0 | 0 | 1 |
| Cluster30199 Acidobact Acidobacteria_Gp2 Gp2                  | 0 | 0 | 0 | 0 | 0 | 0 | 1 | 0 | 0 | 0 | 0 | 0 | 1 |
| Cluster30205 Proteobac Alphap Rhizobiales                     | 0 | 0 | 0 | 0 | 0 | 0 | 0 | 1 | 0 | 0 | 0 | 0 | 1 |

B/ Archaeal OTU

| OTU   | order        | class        | family       | genus         | H1R | E3BS | E4R | E4BS | H1BS | H2R | H2BS | H4R | H4BS | E2R | E2BS | E3R | sum  |
|-------|--------------|--------------|--------------|---------------|-----|------|-----|------|------|-----|------|-----|------|-----|------|-----|------|
| Otu01 | Thaumarchaeo | unclassified | unclassified | unclassified  | 364 | 391  | 509 | 457  | 357  | 446 | 395  | 433 | 408  | 122 | 500  | 352 | 4734 |
| Otu05 | Thaumarchaeo | unclassified | unclassified | unclassified  | 196 | 296  | 306 | 254  | 186  | 211 | 173  | 266 | 239  | 61  | 217  | 251 | 2656 |
| Otu03 | Thaumarchaeo | unclassified | unclassified | unclassified  | 133 | 74   | 43  | 47   | 105  | 144 | 143  | 110 | 143  | 17  | 78   | 76  | 1113 |
| Otu06 | Thaumarchaeo | unclassified | unclassified | unclassified  | 35  | 46   | 7   | 20   | 45   | 11  | 27   | 24  | 46   | 2   | 20   | 49  | 332  |
| Otu07 | Thaumarchaeo | Nitrosopumil | Nitrosopumil | unclassified  | 70  | 9    | 31  | 13   | 66   | 30  | 30   | 16  | 15   | 17  | 27   | 7   | 331  |
| Otu09 | Euryarchaeo  | Thermoplasn  | Thermoplasn  | Terrestrial_M | 50  | 20   | 6   | 15   | 21   | 30  | 57   | 18  | 47   | 12  | 10   | 28  | 314  |
| Otu08 | Thaumarchaeo | Nitrosopumil | Nitrosopumil | unclassified  | 12  | 9    | 3   | 5    | 24   | 32  | 50   | 5   | 10   | 9   | 38   | 61  | 258  |
| Otu04 | Thaumarchaeo | unclassified | unclassified | unclassified  | 6   | 12   | 12  | 15   | 7    | 5   | 12   | 43  | 5    | 4   | 22   | 35  | 178  |
| Otu02 | Thaumarchaeo | unclassified | unclassified | unclassified  | 12  | 61   | 6   | 4    | 42   | 1   | 0    | 4   | 2    | 0   | 3    | 28  | 163  |
| Otu21 | Thaumarchaeo | unclassified | unclassified | unclassified  | 1   | 0    | 1   | 46   | 4    | 0   | 17   | 4   | 0    | 0   | 0    | 0   | 73   |
| Otu11 | Thaumarchaeo | unclassified | unclassified | unclassified  | 4   | 5    | 0   | 2    | 10   | 9   | 10   | 0   | 6    | 0   | 9    | 12  | 67   |
| Otu12 | Thaumarchaeo | unclassified | unclassified | unclassified  | 3   | 1    | 1   | 41   | 2    | 1   | 2    | 0   | 0    | 0   | 1    | 1   | 53   |
| Otu25 | Thaumarchaeo | unclassified | unclassified | unclassified  | 16  | 0    | 1   | 1    | 7    | 5   | 2    | 1   | 2    | 0   | 0    | 2   | 37   |
| Otu19 | Crenarchaeo  | Thermoprote  | Desulfurococ | unclassified  | 3   | 1    | 0   | 0    | 20   | 0   | 0    | 1   | 2    | 0   | 0    | 8   | 35   |
| Otu26 | Euryarchaeo  | Methanomic   | Methanosarc  | Methanosarc   | 7   | 0    | 0   | 1    | 1    | 1   | 0    | 1   | 0    | 13  | 0    | 0   | 24   |
| Otu18 | Thaumarchaeo | Nitrosopumil | Nitrosopumil | unclassified  | 1   | 1    | 0   | 1    | 3    | 0   | 2    | 1   | 1    | 0   | 0    | 4   | 14   |
| Otu22 | Thaumarchaeo | unclassified | unclassified | unclassified  | 1   | 0    | 1   | 6    | 1    | 0   | 1    | 1   | 0    | 1   | 0    | 0   | 12   |
| Otu16 | Crenarchaeo  | Thermoprote  | Desulfurococ | unclassified  | 0   | 1    | 0   | 0    | 6    | 0   | 0    | 0   | 0    | 0   | 0    | 2   | 9    |
| Otu20 | Thaumarchaeo | unclassified | unclassified | unclassified  | 2   | 0    | 1   | 2    | 1    | 0   | 0    | 0   | 0    | 0   | 0    | 0   | 6    |
| Otu44 | Crenarchaeo  | Thermoprote  | unclassified | unclassified  | 0   | 0    | 0   | 0    | 3    | 0   | 0    | 0   | 1    | 0   | 0    | 1   | 5    |
| Otu39 | Thaumarchaeo | Nitrosopumil | Nitrosopumil | unclassified  | 1   | 0    | 0   | 0    | 0    | 1   | 0    | 0   | 0    | 1   | 1    | 0   | 4    |
| Otu10 | Thaumarchaeo | unclassified | unclassified | unclassified  | 1   | 1    | 0   | 0    | 0    | 0   | 1    | 1   | 0    | 0   | 0    | 0   | 4    |
| Otu15 | Thaumarchaeo | unclassified | unclassified | unclassified  | 0   | 1    | 2   | 0    | 0    | 0   | 0    | 1   | 0    | 0   | 0    | 0   | 4    |
| Otu45 | Crenarchaeo  | Thermoprote  | unclassified | unclassified  | 0   | 0    | 0   | 0    | 3    | 0   | 0    | 0   | 0    | 0   | 0    | 0   | 3    |
| Otu57 | Euryarchaeo  | Thermoplasn  | Thermoplasn  | unclassified  | 0   | 0    | 0   | 0    | 1    | 0   | 0    | 0   | 0    | 0   | 1    | 1   | 3    |
| Otu69 | Thaumarchaeo | Nitrosopumil | Nitrosopumil | unclassified  | 0   | 0    | 0   | 0    | 0    | 0   | 2    | 0   | 0    | 0   | 0    | 1   | 3    |

|       |                |              |              |               |   |   |   |   |   |   |   |   |   |   |   |   |   |
|-------|----------------|--------------|--------------|---------------|---|---|---|---|---|---|---|---|---|---|---|---|---|
| Otu56 | Thaumarchaeota | unclassified | unclassified | unclassified  | 0 | 0 | 0 | 0 | 1 | 0 | 2 | 0 | 0 | 0 | 0 | 3 |   |
| Otu60 | Thaumarchaeota | unclassified | unclassified | unclassified  | 0 | 0 | 0 | 0 | 0 | 1 | 0 | 0 | 0 | 0 | 1 | 1 | 3 |
| Otu73 | Thaumarchaeota | unclassified | unclassified | unclassified  | 0 | 0 | 0 | 0 | 0 | 0 | 0 | 0 | 2 | 0 | 0 | 1 | 3 |
| Otu40 | Crenarchaeota  | Thermoprotea | Desulfurococ | unclassified  | 1 | 0 | 0 | 0 | 1 | 0 | 0 | 0 | 0 | 0 | 0 | 0 | 2 |
| Otu81 | Euryarchaeota  | Thermoplasma | Thermoplasma | unclassified  | 0 | 0 | 0 | 0 | 0 | 0 | 0 | 0 | 0 | 0 | 0 | 2 | 2 |
| Otu29 | Euryarchaeota  | unclassified | unclassified | unclassified  | 2 | 0 | 0 | 0 | 0 | 0 | 0 | 0 | 0 | 0 | 0 | 0 | 2 |
| Otu65 | Euryarchaeota  | unclassified | unclassified | unclassified  | 0 | 0 | 0 | 0 | 0 | 0 | 1 | 1 | 0 | 0 | 0 | 0 | 2 |
| Otu33 | Thaumarchaeota | unclassified | unclassified | unclassified  | 1 | 0 | 0 | 0 | 0 | 0 | 0 | 0 | 0 | 0 | 1 | 0 | 2 |
| Otu43 | Thaumarchaeota | unclassified | unclassified | unclassified  | 0 | 0 | 0 | 0 | 2 | 0 | 0 | 0 | 0 | 0 | 0 | 0 | 2 |
| Otu48 | Thaumarchaeota | unclassified | unclassified | unclassified  | 0 | 0 | 0 | 0 | 2 | 0 | 0 | 0 | 0 | 0 | 0 | 0 | 2 |
| Otu62 | Thaumarchaeota | unclassified | unclassified | unclassified  | 0 | 0 | 0 | 0 | 0 | 1 | 0 | 0 | 0 | 0 | 0 | 1 | 2 |
| Otu64 | Thaumarchaeota | unclassified | unclassified | unclassified  | 0 | 0 | 0 | 0 | 0 | 1 | 0 | 0 | 0 | 0 | 1 | 0 | 2 |
| Otu84 | Thaumarchaeota | unclassified | unclassified | unclassified  | 0 | 0 | 0 | 0 | 0 | 0 | 0 | 0 | 0 | 0 | 0 | 2 | 2 |
| Otu34 | Crenarchaeota  | Thermoprotea | Desulfurococ | unclassified  | 1 | 0 | 0 | 0 | 0 | 0 | 0 | 0 | 0 | 0 | 0 | 0 | 1 |
| Otu49 | Crenarchaeota  | Thermoprotea | unclassified | unclassified  | 0 | 0 | 0 | 0 | 1 | 0 | 0 | 0 | 0 | 0 | 0 | 0 | 1 |
| Otu86 | Crenarchaeota  | Thermoprotea | Desulfurococ | unclassified  | 0 | 0 | 0 | 0 | 0 | 0 | 0 | 0 | 0 | 0 | 0 | 1 | 1 |
| Otu88 | Crenarchaeota  | Thermoprotea | Desulfurococ | unclassified  | 0 | 0 | 0 | 0 | 0 | 0 | 0 | 0 | 0 | 0 | 0 | 1 | 1 |
| Otu50 | Euryarchaeota  | Methanomic   | Methanosarc  | Methanosarc   | 0 | 0 | 0 | 0 | 1 | 0 | 0 | 0 | 0 | 0 | 0 | 0 | 1 |
| Otu52 | Euryarchaeota  | Methanomic   | Methanosarc  | Methanosarc   | 0 | 0 | 0 | 0 | 1 | 0 | 0 | 0 | 0 | 0 | 0 | 0 | 1 |
| Otu14 | Euryarchaeota  | Thermoplasma | Thermoplasma | unclassified  | 0 | 1 | 0 | 0 | 0 | 0 | 0 | 0 | 0 | 0 | 0 | 0 | 1 |
| Otu17 | Euryarchaeota  | Thermoplasma | Thermoplasma | Terrestrial_M | 0 | 1 | 0 | 0 | 0 | 0 | 0 | 0 | 0 | 0 | 0 | 0 | 1 |
| Otu31 | Euryarchaeota  | Thermoplasma | Thermoplasma | unclassified  | 1 | 0 | 0 | 0 | 0 | 0 | 0 | 0 | 0 | 0 | 0 | 0 | 1 |
| Otu41 | Euryarchaeota  | Thermoplasma | Thermoplasma | Terrestrial_M | 1 | 0 | 0 | 0 | 0 | 0 | 0 | 0 | 0 | 0 | 0 | 0 | 1 |
| Otu24 | Euryarchaeota  | unclassified | unclassified | unclassified  | 0 | 0 | 1 | 0 | 0 | 0 | 0 | 0 | 0 | 0 | 0 | 0 | 1 |
| Otu30 | Euryarchaeota  | unclassified | unclassified | unclassified  | 1 | 0 | 0 | 0 | 0 | 0 | 0 | 0 | 0 | 0 | 0 | 0 | 1 |
| Otu35 | Euryarchaeota  | unclassified | unclassified | unclassified  | 1 | 0 | 0 | 0 | 0 | 0 | 0 | 0 | 0 | 0 | 0 | 0 | 1 |
| Otu77 | Euryarchaeota  | unclassified | unclassified | unclassified  | 0 | 0 | 0 | 0 | 0 | 0 | 0 | 0 | 0 | 1 | 0 | 0 | 1 |
| Otu78 | Euryarchaeota  | unclassified | unclassified | unclassified  | 0 | 0 | 0 | 0 | 0 | 0 | 0 | 0 | 0 | 1 | 0 | 0 | 1 |
| Otu79 | Euryarchaeota  | unclassified | unclassified | unclassified  | 0 | 0 | 0 | 0 | 0 | 0 | 0 | 0 | 0 | 0 | 1 | 0 | 1 |







C/ Fungal OTUs based on 18S rRNA sequences and associated statistics

| OTUId      | phylum        | class          | order           | family           | genus          | specie         | H1R | E3BS | E4R | E4BS | H1BS | H2R | H2BS | H4R | H4BS | E2R | E2BS | E3R | sum |
|------------|---------------|----------------|-----------------|------------------|----------------|----------------|-----|------|-----|------|------|-----|------|-----|------|-----|------|-----|-----|
| Cluster129 | Basidiomycota | Agaricomycetes | Agaricales      | Amanitaceae      | Amanita        | Amanita bruni  | 3   | 14   | 29  | 8    | 26   | 9   | 7    | 10  | 20   | 19  | 18   | 10  | 173 |
| Cluster776 | Basidiomycota | Agaricomycetes | Agaricales      | Inocybaceae      | Inocybe        | Inocybe aff. a | 0   | 33   | 9   | 3    | 3    | 8   | 16   | 2   | 1    | 5   | 22   | 39  | 141 |
| Cluster289 | Basidiomycota | Agaricomycetes | Agaricales      | Amanitaceae      | Amanita        | Amanita bruni  | 2   | 6    | 13  | 15   | 14   | 4   | 10   | 4   | 15   | 10  | 9    | 13  | 115 |
| Cluster148 | Basidiomycota | Agaricomycetes | Agaricales      | Inocybaceae      | Inocybe        | Inocybe muta   | 1   | 18   | 6   | 5    | 3    | 12  | 14   | 0   | 2    | 5   | 12   | 36  | 114 |
| Cluster673 | Basidiomycota | Agaricomycetes | Boletales       | Scleroderma      | Scleroderma    | Scleroderma    | 20  | 1    | 0   | 0    | 12   | 39  | 11   | 14  | 11   | 0   | 1    | 1   | 110 |
| Cluster136 | Basidiomycota | Agaricomycetes | Atheliales      | Atheliaceae      | Athelia        | Athelia arach  | 2   | 6    | 28  | 54   | 1    | 0   | 1    | 4   | 0    | 1   | 9    | 1   | 107 |
| Cluster66  | Basidiomycota | Agaricomycetes | Boletales       | Scleroderma      | Scleroderma    | Scleroderma    | 77  | 2    | 0   | 0    | 3    | 5   | 2    | 4   | 4    | 0   | 0    | 0   | 97  |
| Cluster716 | Basidiomycota | Agaricomycetes | Boletales       | Boletaceae       | Xerocomella    | Xerocomella    | 1   | 7    | 11  | 5    | 7    | 4   | 1    | 4   | 1    | 21  | 20   | 5   | 87  |
| Cluster711 | Basidiomycota | Agaricomycetes | Boletales       | Scleroderma      | Scleroderma    | Scleroderma    | 0   | 0    | 0   | 0    | 14   | 38  | 14   | 8   | 8    | 0   | 2    | 0   | 84  |
| Cluster408 | Basidiomycota | Agaricomycetes | Russulales      | Russulaceae      | Russula        | Russula exalk  | 5   | 2    | 2   | 1    | 5    | 8   | 9    | 18  | 21   | 4   | 3    | 0   | 78  |
| Cluster847 | Basidiomycota | Agaricomycetes | Russulales      | Lactariaceae     | Lactarius      | Lactarius dec  | 0   | 7    | 5   | 1    | 9    | 3   | 8    | 17  | 21   | 3   | 0    | 1   | 75  |
| Cluster234 | Basidiomycota | Agaricomycetes | Boletales       | Boletaceae       | Xerocomella    | Xerocomella    | 1   | 3    | 14  | 3    | 10   | 3   | 0    | 1   | 1    | 28  | 5    | 4   | 73  |
| Cluster509 | Basidiomycota | Agaricomycetes | Agaricales      | Tricholomataceae | Panellus       | Panellus styp  | 3   | 3    | 6   | 1    | 9    | 7   | 1    | 15  | 20   | 3   | 0    | 5   | 73  |
| Cluster351 | Basidiomycota | Agaricomycetes | Boletales       | Scleroderma      | Scleroderma    | Scleroderma    | 19  | 1    | 0   | 0    | 2    | 20  | 8    | 8   | 1    | 0   | 2    | 0   | 61  |
| Cluster424 | Basidiomycota | Agaricomycetes | Agaricales      | Inocybaceae      | Inocybe        | Inocybe geor   | 0   | 1    | 0   | 1    | 4    | 24  | 21   | 1   | 3    | 0   | 2    | 1   | 58  |
| Cluster508 | Basidiomycota | Agaricomycetes | Hymenochaetales | Phellinaceae     | Phellinus      | Phellinus igni | 0   | 8    | 22  | 17   | 1    | 1   | 1    | 1   | 0    | 1   | 2    | 1   | 55  |
| Cluster525 | Basidiomycota | Agaricomycetes | Agaricales      | Inocybaceae      | Inocybe        | Inocybe aff. a | 0   | 12   | 0   | 8    | 0    | 4   | 4    | 1   | 1    | 2   | 13   | 9   | 54  |
| Cluster59  | Basidiomycota | Agaricomycetes | Agaricales      | Amanitaceae      | Amanita        | Amanita bruni  | 30  | 1    | 1   | 7    | 3    | 1   | 1    | 1   | 1    | 4   | 2    | 1   | 53  |
| Cluster450 | Basidiomycota | Agaricomycetes | Russulales      | Russulaceae      | Russula        | Russula exalk  | 1   | 1    | 1   | 1    | 4    | 3   | 2    | 19  | 12   | 5   | 1    | 1   | 51  |
| Cluster653 | Basidiomycota | Agaricomycetes | Agaricales      | Tricholomataceae | Dendrocollybia | Dendrocollybia | 0   | 1    | 0   | 0    | 8    | 2   | 1    | 17  | 17   | 1   | 0    | 0   | 47  |
| Cluster600 | Ascomycota    | Leotiomycetes  | n               | n                | n              | Leotiomycetes  | 0   | 1    | 7   | 2    | 4    | 3   | 2    | 0   | 2    | 16  | 5    | 4   | 46  |
| Cluster619 | Basidiomycota | Agaricomycetes | Agaricales      | Inocybaceae      | Inocybe        | Inocybe aff. a | 0   | 15   | 4   | 1    | 1    | 4   | 10   | 1   | 1    | 2   | 2    | 5   | 46  |
| Cluster268 | n             | n              | Mortieriales    | Mortierellaceae  | Mortierella    | Mortierella h  | 9   | 5    | 6   | 4    | 4    | 0   | 0    | 3   | 3    | 3   | 4    | 3   | 44  |
| Cluster294 | Basidiomycota | Agaricomycetes | Agaricales      | Inocybaceae      | Inocybe        | Inocybe geor   | 0   | 2    | 1   | 0    | 0    | 13  | 15   | 1   | 2    | 1   | 2    | 6   | 43  |
| Cluster522 | Ascomycota    | Leotiomycetes  | Helotiales      | Bulgariaceae     | Bulgaria       | Bulgaria sp. F | 1   | 1    | 6   | 5    | 7    | 2   | 2    | 2   | 1    | 5   | 5    | 1   | 38  |

|            |              |      |         |          |             |                |    |   |   |    |   |   |    |    |   |    |    |    |    |
|------------|--------------|------|---------|----------|-------------|----------------|----|---|---|----|---|---|----|----|---|----|----|----|----|
| Cluster287 | Basidiomycot | Agar | Thelep  | Theleph  | Thelephora  | Thelephora s   | 0  | 6 | 4 | 13 | 6 | 1 | 0  | 0  | 0 | 5  | 3  | 0  | 38 |
| Cluster721 | Basidiomycot | Agar | Russul  | Russula  | Lactarius   | Lactarius dec  | 0  | 0 | 1 | 2  | 0 | 1 | 2  | 6  | 7 | 8  | 6  | 4  | 37 |
| Cluster826 | n            | n    | Mortie  | Mortier  | Mortierella | Mortierella h  | 1  | 3 | 4 | 7  | 1 | 1 | 5  | 4  | 2 | 3  | 4  | 2  | 37 |
| Cluster63  | Basidiomycot | Agar | Agaric  | n        | Inocybe     | Inocybe aff. a | 1  | 6 | 0 | 2  | 0 | 4 | 2  | 1  | 1 | 1  | 3  | 13 | 34 |
| Cluster533 | Basidiomycot | Agar | Agaric  | n        | Inocybe     | Inocybe geop   | 3  | 0 | 0 | 0  | 4 | 8 | 14 | 1  | 3 | 0  | 1  | 0  | 34 |
| Cluster141 | Basidiomycot | Trem | Tremel  | Tremell  | Asterotrem  | Asterotremel   | 0  | 3 | 5 | 7  | 4 | 0 | 1  | 0  | 2 | 4  | 5  | 2  | 33 |
| Cluster162 | Basidiomycot | Agar | Trechis | 'Trechis | Trechispora | Trechispora a  | 2  | 6 | 1 | 2  | 1 | 1 | 2  | 1  | 2 | 1  | 2  | 11 | 32 |
| Cluster64  | Basidiomycot | Agar | Boletal | Boletac  | Xerocomell  | Xerocomellu    | 1  | 2 | 4 | 0  | 4 | 1 | 1  | 0  | 1 | 10 | 6  | 1  | 31 |
| Cluster114 | Basidiomycot | Agar | Russul  | Russula  | Russula     | Russula com    | 17 | 1 | 1 | 0  | 1 | 0 | 1  | 2  | 5 | 2  | 1  | 0  | 31 |
| Cluster498 | Basidiomycot | Agar | Boletal | n        | Leucogyrop  | Leucogyroph    | 0  | 2 | 2 | 2  | 4 | 0 | 0  | 1  | 1 | 6  | 10 | 3  | 31 |
| Cluster503 | Basidiomycot | Agar | Agaric  | Cortinar | Cortinarius | Cortinarius ic | 1  | 0 | 0 | 1  | 4 | 1 | 1  | 12 | 6 | 2  | 2  | 1  | 31 |
| Cluster96  | Basidiomycot | Agar | Jaapial | Jaapiace | Jaapia      | Jaapia argilla | 1  | 4 | 2 | 15 | 1 | 0 | 1  | 0  | 0 | 2  | 4  | 0  | 30 |
| Cluster613 | Basidiomycot | Agar | Agaric  | n        | Inocybe     | Inocybe geop   | 0  | 0 | 0 | 0  | 0 | 7 | 15 | 4  | 3 | 0  | 1  | 0  | 30 |
| Cluster170 | Basidiomycot | Agar | Agaric  | n        | Inocybe     | Inocybe aff. a | 0  | 9 | 2 | 3  | 0 | 2 | 3  | 2  | 0 | 1  | 1  | 6  | 29 |
| Cluster339 | Basidiomycot | Agar | Boletal | Sclerod  | Scleroderm  | Scleroderma    | 13 | 0 | 0 | 0  | 3 | 6 | 3  | 2  | 1 | 0  | 1  | 0  | 29 |
| Cluster353 | Basidiomycot | Agar | Agaric  | Amanita  | Amanita     | Amanita brui   | 1  | 2 | 4 | 4  | 1 | 1 | 3  | 1  | 2 | 3  | 5  | 2  | 29 |
| Cluster130 | Ascomycota   | Doth | n       | n        | Cenococcur  | Cenococcum     | 3  | 1 | 3 | 0  | 1 | 0 | 0  | 0  | 2 | 14 | 2  | 2  | 28 |
| Cluster227 | Basidiomycot | Agar | Russul  | Russula  | Russula     | Russula exalk  | 3  | 0 | 0 | 0  | 4 | 0 | 3  | 5  | 9 | 0  | 0  | 4  | 28 |
| Cluster823 | Basidiomycot | Agar | Agaric  | Tricholo | Camarophy   | Camarophylli   | 0  | 0 | 0 | 0  | 7 | 1 | 0  | 18 | 0 | 2  | 0  | 0  | 28 |
| Cluster608 | Chytridiomyc | Chyt | Chytric | Chytridi | Chytriomyc  | Chytriomyces   | 3  | 2 | 6 | 5  | 2 | 1 | 1  | 1  | 0 | 3  | 3  | 0  | 27 |
| Cluster474 | Apicomplexa  | Cocc | Eucocc  | Eimeriid | n           | Eimeriidae sp  | 0  | 5 | 1 | 0  | 0 | 3 | 2  | 1  | 3 | 0  | 0  | 11 | 26 |
| Cluster634 | Ascomycota   | Doth | n       | n        | Cenococcur  | Cenococcum     | 1  | 0 | 3 | 1  | 3 | 0 | 2  | 2  | 3 | 6  | 3  | 1  | 25 |
| Cluster667 | Basidiomycot | Agar | Agaric  | n        | Inocybe     | Inocybe aff. a | 0  | 3 | 1 | 0  | 2 | 1 | 4  | 1  | 0 | 0  | 4  | 9  | 25 |
| Cluster486 | Basidiomycot | Agar | Agaric  | Amanita  | Amanita     | Amanita brui   | 1  | 2 | 3 | 2  | 6 | 0 | 3  | 1  | 2 | 3  | 0  | 0  | 23 |
| Cluster624 | Basidiomycot | Agar | Russul  | Russula  | Russula     | Russula exalk  | 3  | 0 | 3 | 0  | 1 | 3 | 3  | 1  | 6 | 3  | 0  | 0  | 23 |
| Cluster73  | Basidiomycot | Agar | Russul  | Russula  | Lactarius   | Lactarius lign | 5  | 2 | 1 | 1  | 1 | 1 | 0  | 1  | 4 | 3  | 1  | 2  | 22 |
| Cluster277 | Basidiomycot | Trem | Filobas | n        | Cryptococci | Cryptococcus   | 0  | 1 | 0 | 3  | 2 | 1 | 1  | 0  | 0 | 7  | 5  | 2  | 22 |
| Cluster320 | Basidiomycot | Agar | Agaric  | n        | Inocybe     | Inocybe aff. a | 0  | 6 | 1 | 3  | 0 | 1 | 0  | 0  | 0 | 1  | 1  | 9  | 22 |
| Cluster733 | Basidiomycot | Agar | Agaric  | Hygroph  | Hygrophoru  | Hygrophorus    | 0  | 3 | 3 | 4  | 0 | 1 | 2  | 0  | 0 | 1  | 5  | 3  | 22 |

|            |               |       |          |          |              |                |   |   |   |   |    |   |    |   |    |   |   |   |    |
|------------|---------------|-------|----------|----------|--------------|----------------|---|---|---|---|----|---|----|---|----|---|---|---|----|
| Cluster103 | Basidiomycoti | Agar  | Agaricæ  | n        | Inocybe      | Inocybe geor   | 7 | 0 | 0 | 0 | 2  | 5 | 6  | 0 | 0  | 0 | 1 | 0 | 21 |
| Cluster302 | Basidiomycoti | Agar  | Agaricæ  | n        | Inocybe      | Inocybe aff. a | 0 | 6 | 0 | 2 | 1  | 3 | 0  | 0 | 0  | 0 | 2 | 7 | 21 |
| Cluster662 | Basidiomycoti | Agar  | Russulæ  | Russula  | Russula      | Russula exalk  | 0 | 0 | 0 | 1 | 1  | 2 | 1  | 7 | 6  | 0 | 3 | 0 | 21 |
| Cluster809 | Basidiomycoti | Agar  | Agaricæ  | n        | Inocybe      | Inocybe geor   | 0 | 0 | 0 | 0 | 4  | 1 | 11 | 2 | 1  | 1 | 1 | 0 | 21 |
| Cluster393 | Ascomycota    | Peziz | Pezizalæ | Discinac | Gyromitra    | Gyromitra es   | 0 | 0 | 0 | 0 | 0  | 0 | 1  | 7 | 12 | 0 | 0 | 0 | 20 |
| Cluster497 | Basidiomycoti | Agar  | Boletal  | Sclerodæ | Scleroderm   | Scleroderma    | 0 | 1 | 0 | 0 | 1  | 7 | 3  | 2 | 3  | 0 | 3 | 0 | 20 |
| Cluster784 | Basidiomycoti | Agar  | Agaricæ  | Tricholo | Pleurocybelæ | Pleurocybella  | 1 | 1 | 0 | 0 | 2  | 2 | 3  | 1 | 9  | 0 | 0 | 1 | 20 |
| Cluster396 | Glomeromyc    | Glon  | Glome    | Glomeræ  | Glomus       | Glomus sp. c   | 0 | 3 | 0 | 3 | 0  | 4 | 3  | 1 | 0  | 0 | 5 | 1 | 20 |
| Cluster880 | n             | n     | Mortie   | Mortieræ | Mortierella  | Mortierella p  | 1 | 3 | 1 | 2 | 0  | 1 | 5  | 2 | 1  | 2 | 1 | 1 | 20 |
| Cluster366 | Ascomycota    | n     | n        | n        | n            | ascomycete s   | 0 | 0 | 4 | 4 | 2  | 1 | 1  | 0 | 0  | 2 | 5 | 0 | 19 |
| Cluster154 | Basidiomycoti | Agar  | Agaricæ  | Amanitæ  | Amanita      | Amanita brui   | 2 | 3 | 3 | 2 | 2  | 0 | 0  | 2 | 1  | 2 | 0 | 2 | 19 |
| Cluster554 | Basidiomycoti | Agar  | Agaricæ  | Amanitæ  | Amanita      | Amanita brui   | 0 | 2 | 1 | 1 | 1  | 1 | 3  | 2 | 3  | 2 | 2 | 1 | 19 |
| Cluster940 | Basidiomycoti | Agar  | Agaricæ  | Tricholo | Dendrocolly  | Dendrocollyk   | 2 | 0 | 0 | 0 | 3  | 1 | 0  | 2 | 10 | 1 | 0 | 0 | 19 |
| Cluster75  | Basidiomycoti | Agar  | Agaricæ  | Tricholo | Dendrocolly  | Dendrocollyk   | 6 | 0 | 0 | 0 | 1  | 0 | 0  | 5 | 5  | 0 | 0 | 1 | 18 |
| Cluster491 | Basidiomycoti | Agar  | Agaricæ  | Amanitæ  | Amanita      | Amanita brui   | 0 | 1 | 1 | 2 | 3  | 1 | 1  | 2 | 1  | 3 | 1 | 2 | 18 |
| Cluster649 | Basidiomycoti | Agar  | Boletal  | Boletacæ | Xerocomellæ  | Xerocomellus   | 0 | 1 | 0 | 2 | 0  | 1 | 0  | 0 | 0  | 5 | 9 | 0 | 18 |
| Cluster195 | n             | n     | Mortie   | Mortieræ | Dissophora   | Dissophora d   | 5 | 2 | 0 | 0 | 1  | 0 | 0  | 2 | 0  | 4 | 3 | 1 | 18 |
| Cluster179 | Basidiomycoti | Agar  | Agaricæ  | Tricholo | Sarcomyxa    | Sarcomyxa se   | 0 | 1 | 4 | 0 | 0  | 0 | 1  | 4 | 1  | 0 | 2 | 4 | 17 |
| Cluster382 | Basidiomycoti | Agar  | Agaricæ  | n        | Inocybe      | Inocybe geor   | 0 | 2 | 0 | 3 | 3  | 2 | 1  | 1 | 0  | 0 | 3 | 2 | 17 |
| Cluster647 | Basidiomycoti | Agar  | Athelia  | Atheliac | Athelia      | Athelia arach  | 0 | 0 | 5 | 5 | 0  | 0 | 2  | 1 | 0  | 0 | 4 | 0 | 17 |
| Cluster969 | n             | n     | Mortie   | Mortieræ | Mortierella  | Mortierella p  | 0 | 2 | 2 | 4 | 4  | 0 | 1  | 1 | 1  | 0 | 1 | 1 | 17 |
| Cluster987 | n             | n     | Mortie   | Mortieræ | Dissophora   | Dissophora d   | 2 | 0 | 4 | 1 | 3  | 2 | 3  | 0 | 0  | 0 | 2 | 0 | 17 |
| Cluster194 | Ascomycota    | Sacc  | Saccha   | n        | Candida      | Candida sp. E  | 0 | 5 | 0 | 4 | 1  | 1 | 0  | 0 | 1  | 3 | 0 | 1 | 16 |
| Cluster26  | Basidiomycoti | Agar  | Russulæ  | Russula  | Russula      | Russula exalk  | 6 | 0 | 1 | 0 | 1  | 1 | 1  | 1 | 2  | 1 | 1 | 1 | 16 |
| Cluster283 | Basidiomycoti | Agar  | Agaricæ  | n        | Inocybe      | Inocybe aff. a | 1 | 6 | 0 | 0 | 0  | 1 | 2  | 0 | 0  | 1 | 2 | 3 | 16 |
| Cluster455 | Basidiomycoti | Agar  | Agaricæ  | Amanitæ  | Amanita      | Amanita brui   | 0 | 1 | 2 | 0 | 10 | 1 | 1  | 0 | 1  | 0 | 0 | 0 | 16 |
| Cluster551 | Basidiomycoti | Agar  | Jaapial  | Jaapiacæ | Jaapia       | Jaapia argilla | 0 | 2 | 5 | 4 | 0  | 0 | 2  | 0 | 1  | 1 | 1 | 0 | 16 |
| Cluster688 | Basidiomycoti | Agar  | Russulæ  | Russula  | Lactarius    | Lactarius lign | 0 | 0 | 1 | 1 | 2  | 1 | 2  | 5 | 4  | 0 | 0 | 0 | 16 |
| Cluster321 | Ascomycota    | Doth  | n        | n        | Cenococcur   | Cenococcum     | 1 | 0 | 2 | 0 | 2  | 0 | 0  | 1 | 2  | 1 | 3 | 3 | 15 |

|            |                 |             |                |                    |                    |                    |   |   |   |   |   |   |   |   |   |   |   |   |    |
|------------|-----------------|-------------|----------------|--------------------|--------------------|--------------------|---|---|---|---|---|---|---|---|---|---|---|---|----|
| Cluster164 | Basidiomycota   | Agar        | Boletales      | Boletaceae         | Xerocomellaceae    | Xerocomellaceae    | 1 | 1 | 2 | 0 | 4 | 0 | 1 | 0 | 1 | 3 | 2 | 0 | 15 |
| Cluster178 | Ascomycota      | Leotiales   | Myxotriphales  | Byssosporiaceae    | Byssosporiaceae    | Byssosporiaceae    | 2 | 0 | 1 | 1 | 0 | 0 | 0 | 2 | 0 | 6 | 1 | 1 | 14 |
| Cluster602 | Ascomycota      | Leotiales   | Helotiales     | Helotiaceae        | Hymenoscyphaceae   | Hymenoscyphaceae   | 0 | 2 | 1 | 1 | 2 | 1 | 1 | 0 | 0 | 2 | 3 | 1 | 14 |
| Cluster67  | Basidiomycota   | Agar        | Boletales      | Boletaceae         | Xerocomellaceae    | Xerocomellaceae    | 3 | 0 | 0 | 1 | 1 | 0 | 0 | 1 | 1 | 3 | 2 | 2 | 14 |
| Cluster177 | Basidiomycota   | Agar        | Agaricales     | Inocybaceae        | Inocybaceae        | Inocybaceae        | 0 | 0 | 0 | 1 | 2 | 8 | 2 | 0 | 0 | 0 | 1 | 0 | 14 |
| Cluster183 | Basidiomycota   | Agar        | Russulales     | Russulaceae        | Russulaceae        | Russulaceae        | 2 | 1 | 0 | 0 | 1 | 0 | 1 | 7 | 0 | 1 | 1 | 0 | 14 |
| Cluster303 | n               | n           | Mucorales      | Umbelopsis         | Umbelopsis         | Umbelopsis         | 1 | 4 | 1 | 1 | 3 | 0 | 0 | 1 | 1 | 1 | 0 | 1 | 14 |
| Cluster638 | n               | n           | Mortieriales   | Mortierellaceae    | Mortierellaceae    | Mortierellaceae    | 1 | 1 | 0 | 3 | 4 | 1 | 1 | 0 | 2 | 0 | 1 | 0 | 14 |
| Cluster117 | Apicomplexa     | Coccolporea | Eimeriidae     | Eimeriidae         | Eimeriidae         | Eimeriidae         | 1 | 4 | 2 | 0 | 0 | 1 | 2 | 0 | 2 | 0 | 0 | 1 | 13 |
| Cluster186 | Basidiomycota   | Agar        | Boletales      | Scleroderma        | Scleroderma        | Scleroderma        | 2 | 0 | 0 | 0 | 1 | 1 | 2 | 5 | 1 | 0 | 1 | 0 | 13 |
| Cluster190 | Basidiomycota   | Agar        | Agaricales     | Tricholomataceae   | Laccaria           | Laccaria           | 1 | 0 | 0 | 1 | 2 | 0 | 1 | 4 | 3 | 1 | 0 | 0 | 13 |
| Cluster260 | Basidiomycota   | Agar        | Russulales     | Russulaceae        | Lactarius          | Lactarius          | 0 | 0 | 1 | 2 | 0 | 1 | 0 | 4 | 0 | 3 | 1 | 1 | 13 |
| Cluster539 | Basidiomycota   | Agar        | Boletales      | Scleroderma        | Scleroderma        | Scleroderma        | 0 | 0 | 0 | 0 | 2 | 5 | 4 | 2 | 0 | 0 | 0 | 0 | 13 |
| Cluster757 | Basidiomycota   | Agar        | Agaricales     | Inocybaceae        | Inocybaceae        | Inocybaceae        | 0 | 6 | 1 | 0 | 1 | 2 | 1 | 0 | 0 | 0 | 1 | 1 | 13 |
| Cluster204 | n               | n           | Mortieriales   | Mortierellaceae    | Mortierellaceae    | Mortierellaceae    | 3 | 3 | 0 | 0 | 1 | 0 | 0 | 1 | 2 | 0 | 1 | 2 | 13 |
| Cluster913 | n               | n           | Mortieriales   | Mortierellaceae    | Mortierellaceae    | Mortierellaceae    | 0 | 0 | 0 | 2 | 1 | 2 | 4 | 0 | 1 | 3 | 0 | 0 | 13 |
| Cluster986 | n               | n           | Mortieriales   | Mortierellaceae    | Mortierellaceae    | Mortierellaceae    | 0 | 1 | 1 | 1 | 1 | 2 | 2 | 0 | 0 | 0 | 2 | 3 | 13 |
| Cluster76  | Ascomycota      | Pezizales   | Disciniales    | Gyromitridae       | Gyromitridae       | Gyromitridae       | 5 | 0 | 0 | 0 | 2 | 0 | 1 | 1 | 2 | 0 | 0 | 1 | 12 |
| Cluster65  | Basidiomycota   | Agar        | Agaricales     | Tricholomataceae   | Pleurocybella      | Pleurocybella      | 9 | 0 | 0 | 0 | 1 | 0 | 0 | 0 | 2 | 0 | 0 | 0 | 12 |
| Cluster107 | Basidiomycota   | Agar        | Agaricales     | Inocybaceae        | Inocybaceae        | Inocybaceae        | 0 | 8 | 0 | 0 | 0 | 1 | 0 | 0 | 0 | 0 | 0 | 3 | 12 |
| Cluster161 | Basidiomycota   | n           | Leucosporiales | Leucosporiaceae    | Leucosporiaceae    | Leucosporiaceae    | 0 | 5 | 0 | 1 | 0 | 0 | 0 | 0 | 1 | 2 | 2 | 1 | 12 |
| Cluster243 | Basidiomycota   | Agar        | Sebacinales    | Craterocollaceae   | Craterocollaceae   | Craterocollaceae   | 0 | 1 | 0 | 3 | 4 | 1 | 0 | 0 | 0 | 2 | 1 | 0 | 12 |
| Cluster401 | Basidiomycota   | Tremellales | Tremellales    | Asterotremellaceae | Asterotremellaceae | Asterotremellaceae | 1 | 2 | 0 | 2 | 2 | 1 | 0 | 0 | 1 | 2 | 1 | 0 | 12 |
| Cluster717 | Basidiomycota   | Agar        | Agaricales     | Inocybaceae        | Inocybaceae        | Inocybaceae        | 0 | 1 | 1 | 0 | 0 | 0 | 0 | 1 | 1 | 1 | 1 | 6 | 12 |
| Cluster217 | Chytridiomycota | Chytriales  | Chytriales     | Chytridiaceae      | Chytridiaceae      | Chytridiaceae      | 4 | 0 | 4 | 0 | 2 | 0 | 0 | 0 | 0 | 2 | 0 | 0 | 12 |
| Cluster256 | n               | n           | Mortieriales   | Mortierellaceae    | Mortierellaceae    | Mortierellaceae    | 2 | 2 | 0 | 1 | 0 | 0 | 0 | 1 | 0 | 0 | 2 | 4 | 12 |
| Cluster44  | Basidiomycota   | Agar        | Agaricales     | Inocybaceae        | Inocybaceae        | Inocybaceae        | 2 | 0 | 0 | 0 | 0 | 1 | 6 | 1 | 1 | 0 | 0 | 0 | 11 |
| Cluster52  | Basidiomycota   | Agar        | Russulales     | Russulaceae        | Russulaceae        | Russulaceae        | 6 | 0 | 0 | 0 | 1 | 0 | 0 | 0 | 4 | 0 | 0 | 0 | 11 |
| Cluster97  | Basidiomycota   | Agar        | Agaricales     | Amanitaceae        | Amanitaceae        | Amanitaceae        | 2 | 0 | 1 | 2 | 2 | 0 | 1 | 1 | 0 | 0 | 2 | 0 | 11 |

|            |                              |                |                  |   |   |   |   |   |   |   |   |   |   |   |   |    |
|------------|------------------------------|----------------|------------------|---|---|---|---|---|---|---|---|---|---|---|---|----|
| Cluster278 | Basidiomycota Trem Filobas n | Cryptococci    | Cryptococcus     | 0 | 2 | 0 | 1 | 2 | 0 | 0 | 0 | 0 | 2 | 3 | 1 | 11 |
| Cluster352 | Basidiomycota Agar Boletal   | Scleroderma    | Scleroderma      | 3 | 0 | 0 | 0 | 0 | 5 | 1 | 1 | 1 | 0 | 0 | 0 | 11 |
| Cluster384 | Basidiomycota Agar Agarica   | Tricholoma     | Camarophyllum    | 0 | 1 | 0 | 0 | 1 | 1 | 0 | 7 | 1 | 0 | 0 | 0 | 11 |
| Cluster492 | Basidiomycota Agar Agarica   | Inocybe        | Inocybe geophila | 0 | 0 | 0 | 0 | 2 | 4 | 4 | 0 | 1 | 0 | 0 | 0 | 11 |
| Cluster655 | Basidiomycota Trem Tremella  | Asterotremella | Asterotremella   | 0 | 0 | 0 | 1 | 1 | 1 | 1 | 1 | 0 | 3 | 2 | 1 | 11 |
| Cluster781 | Basidiomycota Agar Agarica   | Inocybe        | Inocybe aff. a   | 0 | 3 | 0 | 0 | 2 | 0 | 1 | 1 | 0 | 0 | 3 | 1 | 11 |
| Cluster787 | Basidiomycota Agar Agarica   | Inocybe        | Inocybe aff. a   | 0 | 1 | 0 | 3 | 0 | 0 | 2 | 0 | 0 | 0 | 4 | 1 | 11 |
| Cluster842 | Basidiomycota Agar Boletal   | Boletaceae     | Xerocomella      | 0 | 0 | 1 | 0 | 2 | 1 | 0 | 0 | 0 | 4 | 2 | 1 | 11 |
| Cluster56  | Ascomycota Leoti n           | Ascodicium     | Pseudophaciella  | 3 | 0 | 1 | 0 | 0 | 0 | 3 | 1 | 0 | 1 | 0 | 1 | 10 |
| Cluster68  | Ascomycota Leoti n           | Myxotripha     | Byssosascus      | 1 | 1 | 2 | 1 | 2 | 0 | 0 | 0 | 0 | 3 | 0 | 0 | 10 |
| Cluster315 | Ascomycota Sord Hypocr       | Hypocrepium    | Hypomyces        | 0 | 0 | 0 | 2 | 1 | 0 | 0 | 1 | 0 | 6 | 0 | 0 | 10 |
| Cluster964 | Ascomycota Arch Archae       | Archaeorhizium | Archaeorhizium   | 0 | 1 | 6 | 3 | 0 | 0 | 0 | 0 | 0 | 0 | 0 | 0 | 10 |
| Cluster16  | Basidiomycota Agar Agarica   | Amanita        | Amanita bruniata | 5 | 0 | 1 | 2 | 1 | 0 | 0 | 0 | 0 | 0 | 0 | 1 | 10 |
| Cluster128 | Basidiomycota Agar Agarica   | Tricholoma     | Dendrocollybia   | 4 | 0 | 0 | 0 | 1 | 0 | 0 | 2 | 3 | 0 | 0 | 0 | 10 |
| Cluster150 | Basidiomycota Agar Agarica   | Tricholoma     | Panellus         | 0 | 0 | 0 | 1 | 0 | 1 | 0 | 0 | 3 | 0 | 0 | 5 | 10 |
| Cluster212 | Basidiomycota Agar Agarica   | Amanita        | Amanita muscaria | 0 | 1 | 0 | 1 | 1 | 0 | 0 | 0 | 0 | 7 | 0 | 0 | 10 |
| Cluster265 | Basidiomycota Agar Agarica   | Inocybe        | Inocybe geophila | 0 | 0 | 0 | 1 | 0 | 4 | 4 | 1 | 0 | 0 | 0 | 0 | 10 |
| Cluster314 | Basidiomycota Trem Cystofi   | Cystofilum     | Mrakia           | 0 | 7 | 0 | 0 | 0 | 0 | 0 | 0 | 1 | 0 | 1 | 1 | 10 |
| Cluster409 | Basidiomycota Agar Russula   | Russula        | Lactarius        | 0 | 0 | 2 | 1 | 0 | 0 | 0 | 0 | 0 | 5 | 2 | 0 | 10 |
| Cluster510 | Basidiomycota Agar Agarica   | Inocybe        | Inocybe geophila | 0 | 1 | 0 | 0 | 1 | 4 | 4 | 0 | 0 | 0 | 0 | 0 | 10 |
| Cluster775 | Basidiomycota Agar Agarica   | Amanita        | Amanita bruniata | 3 | 2 | 1 | 0 | 1 | 0 | 0 | 1 | 1 | 0 | 0 | 1 | 10 |
| Cluster840 | Basidiomycota Agar Thelep    | Thelephora     | Thelephora       | 0 | 1 | 2 | 5 | 0 | 0 | 0 | 0 | 0 | 0 | 2 | 0 | 10 |
| Cluster370 | n n                          | Mortierella    | Mortierella      | 1 | 1 | 0 | 2 | 4 | 0 | 0 | 0 | 0 | 0 | 1 | 1 | 10 |
| Cluster400 | Apicomplexa Cocc Eucocc      | Eimeriidae     | Eimeriidae       | 1 | 3 | 0 | 1 | 1 | 1 | 0 | 0 | 2 | 0 | 0 | 0 | 9  |
| Cluster404 | Ascomycota Sord Ophios       | Ophiostoma     | Grosmannia       | 0 | 2 | 1 | 0 | 0 | 0 | 0 | 0 | 0 | 1 | 4 | 1 | 9  |
| Cluster635 | Ascomycota Saccl Saccha n    | Candida        | Candida sp. E    | 0 | 2 | 1 | 0 | 1 | 0 | 0 | 0 | 0 | 3 | 2 | 0 | 9  |
| Cluster751 | Ascomycota Leoti n           | Rhytisma       | Rhytisma         | 0 | 0 | 0 | 0 | 0 | 0 | 0 | 0 | 0 | 0 | 6 | 3 | 9  |
| Cluster90  | Basidiomycota Agar Russula   | Russula        | Russula exalk    | 2 | 0 | 0 | 0 | 2 | 1 | 1 | 1 | 2 | 0 | 0 | 0 | 9  |
| Cluster99  | Basidiomycota Agar Agarica   | Bolbitia       | Bolbitius        | 4 | 0 | 0 | 0 | 0 | 0 | 1 | 1 | 1 | 1 | 1 | 0 | 9  |

|             |               |       |         |          |             |                |   |   |   |   |   |   |   |   |   |   |   |   |
|-------------|---------------|-------|---------|----------|-------------|----------------|---|---|---|---|---|---|---|---|---|---|---|---|
| Cluster331  | Basidiomycota | Agar  | Agaricæ | Hygroph  | Humidicutis | Humidicutis    | 1 | 0 | 0 | 0 | 0 | 1 | 1 | 0 | 0 | 1 | 5 | 9 |
| Cluster363  | Basidiomycota | Agar  | Agaricæ | n        | Inocybe     | Inocybe aff. a | 0 | 1 | 0 | 0 | 2 | 1 | 1 | 0 | 0 | 1 | 3 | 9 |
| Cluster388  | Basidiomycota | Agar  | Agaricæ | Bolbitia | Bolbitius   | Bolbitius vite | 0 | 0 | 0 | 0 | 0 | 1 | 3 | 4 | 0 | 1 | 0 | 9 |
| Cluster440  | Basidiomycota | Agar  | Agaricæ | Tricholo | Camarophy   | Camarophyll    | 0 | 0 | 0 | 1 | 2 | 0 | 0 | 4 | 2 | 0 | 0 | 9 |
| Cluster502  | Basidiomycota | Agar  | Agaricæ | n        | Inocybe     | Inocybe aff. a | 0 | 2 | 1 | 1 | 0 | 0 | 1 | 0 | 0 | 0 | 4 | 9 |
| Cluster679  | Basidiomycota | Agar  | Agaricæ | Amanita  | Amanita     | Amanita brui   | 1 | 2 | 0 | 1 | 1 | 0 | 0 | 1 | 0 | 2 | 0 | 9 |
| Cluster762  | Basidiomycota | Agar  | Boletal | Boletac  | Xerocomelli | Xerocomellus   | 0 | 0 | 1 | 0 | 0 | 2 | 0 | 0 | 0 | 3 | 3 | 9 |
| Cluster1013 | n             | n     | Mortie  | Mortier  | Dissophora  | Dissophora d   | 0 | 0 | 0 | 0 | 2 | 0 | 2 | 1 | 2 | 0 | 2 | 9 |
| Cluster241  | Ascomycota    | Sord  | Hypocr  | Hypocre  | Hypocrea    | Hypocrea kor   | 2 | 0 | 0 | 0 | 0 | 3 | 0 | 0 | 1 | 1 | 0 | 8 |
| Cluster819  | Ascomycota    | Sord  | Hypocr  | Cordyci  | Isaria      | Isaria javanic | 0 | 0 | 1 | 1 | 2 | 0 | 0 | 0 | 0 | 3 | 1 | 8 |
| Cluster19   | Basidiomycota | Agar  | Agaricæ | Amanita  | Amanita     | Amanita brui   | 2 | 0 | 0 | 0 | 3 | 1 | 1 | 0 | 0 | 1 | 0 | 8 |
| Cluster70   | Basidiomycota | Agar  | Athelia | Atheliac | Athelia     | Athelia arach  | 0 | 1 | 3 | 3 | 0 | 0 | 0 | 0 | 0 | 0 | 1 | 8 |
| Cluster120  | Basidiomycota | Agar  | Agaricæ | Tricholo | Melanoleuc  | Melanoleuca    | 0 | 0 | 0 | 2 | 0 | 0 | 0 | 0 | 0 | 1 | 0 | 8 |
| Cluster296  | Basidiomycota | Agar  | Agaricæ | Tricholo | Collybia    | Collybia tube  | 0 | 1 | 0 | 0 | 0 | 1 | 0 | 5 | 1 | 0 | 0 | 8 |
| Cluster585  | Basidiomycota | Agar  | Boletal | Boletac  | Boletus     | Boletus eduli  | 0 | 1 | 2 | 0 | 0 | 0 | 1 | 0 | 0 | 3 | 0 | 8 |
| Cluster637  | Basidiomycota | Agar  | Agaricæ | Tricholo | Dendrocolly | Dendrocollyk   | 0 | 0 | 0 | 0 | 1 | 0 | 1 | 3 | 2 | 0 | 0 | 8 |
| Cluster651  | Basidiomycota | Agar  | Agaricæ | Tricholo | Dendrocolly | Dendrocollyk   | 0 | 0 | 0 | 0 | 0 | 0 | 0 | 8 | 0 | 0 | 0 | 8 |
| Cluster390  | n             | n     | Mortie  | Mortier  | Dissophora  | Dissophora d   | 4 | 0 | 0 | 2 | 1 | 0 | 0 | 1 | 0 | 0 | 0 | 8 |
| Cluster444  | n             | n     | Mortie  | Mortier  | Mortierella | Mortierella h  | 1 | 1 | 0 | 1 | 0 | 1 | 3 | 0 | 0 | 1 | 0 | 8 |
| Cluster246  | Annelida      | Poly  | Phylloc | Syllidae | Typosyllis  | Typosyllis bel | 0 | 0 | 1 | 4 | 1 | 1 | 0 | 0 | 0 | 0 | 0 | 7 |
| Cluster45   | Ascomycota    | Leoti | n       | Myxotri  | Byussoascus | Byussoascus st | 2 | 0 | 1 | 1 | 0 | 0 | 0 | 0 | 2 | 0 | 0 | 7 |
| Cluster527  | Ascomycota    | Sord  | Hypocr  | Ophiocc  | Ophiocordy  | Ophiocordyc    | 0 | 0 | 2 | 0 | 0 | 0 | 1 | 1 | 0 | 3 | 0 | 7 |
| Cluster9    | Basidiomycota | Agar  | Agaricæ | Tricholo | Dendrocolly | Dendrocollyk   | 3 | 0 | 0 | 0 | 1 | 0 | 0 | 0 | 3 | 0 | 0 | 7 |
| Cluster38   | Basidiomycota | Agar  | Athelia | Atheliac | Athelia     | Athelia arach  | 0 | 1 | 0 | 4 | 0 | 0 | 0 | 0 | 0 | 0 | 1 | 7 |
| Cluster71   | Basidiomycota | Agar  | Athelia | Atheliac | Amphinem    | Amphinema      | 0 | 1 | 3 | 1 | 0 | 0 | 0 | 1 | 0 | 0 | 1 | 7 |
| Cluster102  | Basidiomycota | Agar  | Boletal | Sclerod  | Scleroderm  | Scleroderma    | 4 | 0 | 0 | 0 | 0 | 0 | 1 | 0 | 1 | 0 | 0 | 7 |
| Cluster106  | Basidiomycota | Agar  | Agaricæ | n        | Inocybe     | Inocybe aff. a | 1 | 1 | 0 | 0 | 0 | 0 | 1 | 0 | 0 | 1 | 0 | 7 |
| Cluster108  | Basidiomycota | Agar  | Agaricæ | Tricholo | Laccaria    | Laccaria ame   | 3 | 0 | 0 | 0 | 1 | 1 | 0 | 1 | 1 | 0 | 0 | 7 |
| Cluster132  | Basidiomycota | Agar  | Agaricæ | Amanita  | Amanita     | Amanita brui   | 1 | 0 | 3 | 0 | 2 | 0 | 0 | 0 | 0 | 0 | 0 | 7 |

|             |              |              |          |               |                |   |   |   |   |   |   |   |   |   |   |   |   |   |
|-------------|--------------|--------------|----------|---------------|----------------|---|---|---|---|---|---|---|---|---|---|---|---|---|
| Cluster206  | Basidiomycot | Agar Russul: | Russula: | Lactarius     | Lactarius lign | 0 | 1 | 0 | 0 | 0 | 0 | 2 | 1 | 2 | 0 | 0 | 1 | 7 |
| Cluster215  | Basidiomycot | Agar Boletal | Sclerodē | Scleroderm    | Scleroderma    | 4 | 0 | 0 | 0 | 0 | 3 | 0 | 0 | 0 | 0 | 0 | 0 | 7 |
| Cluster248  | Basidiomycot | Agar Boletal | Boletacē | Xerocomell    | Xerocomellu:   | 0 | 0 | 2 | 0 | 1 | 0 | 0 | 0 | 0 | 3 | 0 | 1 | 7 |
| Cluster313  | Basidiomycot | Agar Polypo  | Polypor: | Trichaptum    | Trichaptum b   | 0 | 1 | 3 | 0 | 0 | 0 | 0 | 0 | 0 | 0 | 1 | 2 | 7 |
| Cluster494  | Basidiomycot | Agar Boletal | Sclerodē | Scleroderm    | Scleroderma    | 0 | 0 | 0 | 0 | 1 | 4 | 0 | 2 | 0 | 0 | 0 | 0 | 7 |
| Cluster595  | Basidiomycot | Agar Agaricā | n        | Inocybe       | Inocybe geop   | 0 | 2 | 0 | 0 | 1 | 0 | 2 | 0 | 0 | 0 | 1 | 1 | 7 |
| Cluster603  | Basidiomycot | Agar Agaricā | n        | Inocybe       | Inocybe aff. a | 0 | 1 | 1 | 0 | 0 | 1 | 2 | 0 | 0 | 0 | 1 | 1 | 7 |
| Cluster620  | Basidiomycot | Agar Agaricā | Lyophyll | Asterophor:   | Asterophora    | 0 | 4 | 0 | 0 | 0 | 0 | 0 | 0 | 0 | 0 | 0 | 3 | 7 |
| Cluster656  | Basidiomycot | Agar Agaricā | Tricholo | Camarophy     | Camarophylli   | 1 | 0 | 1 | 0 | 1 | 0 | 0 | 3 | 1 | 0 | 0 | 0 | 7 |
| Cluster185  | n            | n            | Mortie   | Mortier:      | Mortierella    | 2 | 1 | 0 | 0 | 0 | 0 | 1 | 2 | 0 | 0 | 1 | 0 | 7 |
| Cluster207  | Ascomycota   | Leoti n      | Myxotri: | Byussoascus   | Byussoascus st | 0 | 2 | 0 | 0 | 1 | 0 | 0 | 0 | 1 | 0 | 2 | 0 | 6 |
| Cluster293  | Ascomycota   | Euro Eurotia | Trichocc | Penicillium   | Penicillium h  | 0 | 1 | 1 | 0 | 1 | 1 | 0 | 0 | 0 | 2 | 0 | 0 | 6 |
| Cluster299  | Ascomycota   | Leoti n      | Myxotri: | Byussoascus   | Byussoascus st | 0 | 1 | 1 | 1 | 0 | 0 | 0 | 2 | 0 | 0 | 1 | 0 | 6 |
| Cluster505  | Ascomycota   | Doth n       | n        | Cenococcur    | Cenococcum     | 0 | 0 | 0 | 1 | 0 | 0 | 0 | 0 | 0 | 2 | 2 | 1 | 6 |
| Cluster85   | Basidiomycot | Agar Agaricā | n        | Inocybe       | Inocybe geop   | 2 | 1 | 0 | 0 | 1 | 2 | 0 | 0 | 0 | 0 | 0 | 0 | 6 |
| Cluster133  | Basidiomycot | Agar Boletal | Boletacē | Boletus       | Boletus eduli  | 0 | 2 | 3 | 1 | 0 | 0 | 0 | 0 | 0 | 0 | 0 | 0 | 6 |
| Cluster171  | Basidiomycot | Agar Russul: | Russula: | Russula       | Russula exalk  | 3 | 0 | 0 | 0 | 0 | 1 | 0 | 1 | 1 | 0 | 0 | 0 | 6 |
| Cluster203  | Basidiomycot | Agar Russul: | Russula: | Russula       | Russula exalk  | 0 | 1 | 0 | 1 | 1 | 1 | 0 | 1 | 1 | 0 | 0 | 0 | 6 |
| Cluster239  | Basidiomycot | Agar Boletal | n        | Leucogyrop    | Leucogyroph    | 0 | 0 | 1 | 1 | 0 | 1 | 0 | 0 | 0 | 2 | 0 | 1 | 6 |
| Cluster326  | Basidiomycot | Agar Boletal | Boletacē | Xerocomell    | Xerocomellu:   | 0 | 0 | 2 | 2 | 0 | 0 | 0 | 0 | 0 | 1 | 1 | 0 | 6 |
| Cluster520  | Basidiomycot | Agar Agaricā | Amanitā  | Amanita       | Amanita aff. f | 0 | 0 | 1 | 0 | 2 | 0 | 0 | 1 | 0 | 1 | 0 | 1 | 6 |
| Cluster562  | Basidiomycot | Agar Agaricā | n        | Inocybe       | Inocybe geop   | 0 | 1 | 0 | 0 | 0 | 1 | 3 | 0 | 1 | 0 | 0 | 0 | 6 |
| Cluster682  | Basidiomycot | Agar Agaricā | Tricholo | Dendrocoll    | Dendrocollyk   | 0 | 0 | 0 | 1 | 1 | 1 | 0 | 2 | 1 | 0 | 0 | 0 | 6 |
| Cluster811  | Basidiomycot | Agar Agaricā | Tricholo | Melanoleuc    | Melanoleuca    | 0 | 0 | 0 | 0 | 0 | 1 | 0 | 0 | 0 | 1 | 1 | 3 | 6 |
| Cluster812  | Basidiomycot | Agar Sebaci  | Sebacin: | Craterocollā  | Craterocolla   | 0 | 1 | 0 | 0 | 0 | 1 | 0 | 0 | 0 | 2 | 1 | 1 | 6 |
| Cluster879  | Basidiomycot | Agar Russul: | Russula: | Russula       | Russula exalk  | 0 | 0 | 0 | 0 | 0 | 0 | 1 | 4 | 1 | 0 | 0 | 0 | 6 |
| Cluster1030 | Basidiomycot | Agar Agaricā | n        | Inocybe       | Inocybe aff. a | 0 | 0 | 0 | 0 | 0 | 1 | 1 | 0 | 0 | 1 | 1 | 2 | 6 |
| Cluster274  | Glomeromyc   | Glon Diversi | Acaulos  | Acaulospor:   | Acaulospora    | 0 | 0 | 0 | 0 | 1 | 1 | 0 | 0 | 0 | 4 | 0 | 0 | 6 |
| Cluster292  | n            | Chry Chrom   | Chromu n | Spumella-like |                | 0 | 0 | 1 | 3 | 0 | 1 | 0 | 0 | 0 | 1 | 0 | 0 | 6 |

|            |              |       |         |          |             |                |   |   |   |   |   |   |   |   |   |   |   |   |   |
|------------|--------------|-------|---------|----------|-------------|----------------|---|---|---|---|---|---|---|---|---|---|---|---|---|
| Cluster454 | n            | n     | Mortier | Mortier  | Gamsiella   | Gamsiella mu   | 1 | 1 | 0 | 0 | 0 | 2 | 1 | 0 | 1 | 0 | 0 | 0 | 6 |
| Cluster36  | Ascomycota   | n     | n       | n        | n           | ascomycete s   | 1 | 0 | 0 | 2 | 0 | 0 | 0 | 1 | 0 | 1 | 0 | 0 | 5 |
| Cluster54  | Ascomycota   | Doth  | n       | n        | Cenococcur  | Cenococcum     | 0 | 0 | 1 | 0 | 2 | 0 | 0 | 0 | 0 | 2 | 0 | 0 | 5 |
| Cluster109 | Ascomycota   | Saccl | Saccha  | n        | Candida     | Candida sp. E  | 0 | 1 | 0 | 0 | 1 | 0 | 0 | 0 | 0 | 1 | 2 | 0 | 5 |
| Cluster173 | Ascomycota   | Doth  | n       | n        | Cenococcur  | Cenococcum     | 0 | 0 | 0 | 0 | 0 | 1 | 0 | 0 | 0 | 4 | 0 | 0 | 5 |
| Cluster295 | Ascomycota   | Peziz | Pezizal | Pyroner  | Scutellinia | Scutellinia sc | 0 | 2 | 0 | 3 | 0 | 0 | 0 | 0 | 0 | 0 | 0 | 0 | 5 |
| Cluster298 | Ascomycota   | Sord  | Sordari | Chaetor  | Chaetomiur  | Chaetomium     | 0 | 0 | 0 | 0 | 2 | 0 | 0 | 0 | 0 | 2 | 1 | 0 | 5 |
| Cluster358 | Ascomycota   | Arch  | Archae  | Archaeo  | Archaeorhiz | Archaeorhizc   | 0 | 0 | 1 | 3 | 0 | 0 | 0 | 0 | 0 | 0 | 0 | 1 | 5 |
| Cluster786 | Ascomycota   | Arch  | Archae  | Archaeo  | Archaeorhiz | Archaeorhizc   | 0 | 0 | 4 | 1 | 0 | 0 | 0 | 0 | 0 | 0 | 0 | 0 | 5 |
| Cluster22  | Basidiomycot | Agar  | Agaricæ | Amanitæ  | Amanita     | Amanita brui   | 4 | 0 | 0 | 0 | 0 | 0 | 1 | 0 | 0 | 0 | 0 | 0 | 5 |
| Cluster30  | Basidiomycot | Agar  | Agaricæ | n        | Inocybe     | Inocybe aff. a | 1 | 1 | 0 | 0 | 0 | 0 | 0 | 0 | 0 | 0 | 1 | 2 | 5 |
| Cluster78  | Basidiomycot | Agar  | Sebacii | Sebacin  | Sebacina    | Sebacina ver   | 0 | 0 | 2 | 3 | 0 | 0 | 0 | 0 | 0 | 0 | 0 | 0 | 5 |
| Cluster153 | Basidiomycot | Agar  | Agaricæ | Amanitæ  | Amanita     | Amanita aff. i | 0 | 2 | 1 | 1 | 1 | 0 | 0 | 0 | 0 | 0 | 0 | 0 | 5 |
| Cluster191 | Basidiomycot | Agar  | Cantha  | Botryob  | Botryobasic | Botryobasidi   | 0 | 1 | 1 | 0 | 0 | 0 | 0 | 0 | 0 | 2 | 1 | 0 | 5 |
| Cluster360 | Basidiomycot | Agar  | Agaricæ | Tricholo | Melanoleuc  | Melanoleuca    | 0 | 1 | 1 | 0 | 0 | 0 | 0 | 0 | 0 | 0 | 0 | 3 | 5 |
| Cluster367 | Basidiomycot | Agar  | Agaricæ | Lyophyll | Asterophor  | Asterophora    | 0 | 3 | 0 | 0 | 0 | 0 | 0 | 0 | 0 | 0 | 0 | 2 | 5 |
| Cluster402 | Basidiomycot | Agar  | Boletal | Boletacæ | Xerocomelli | Xerocomellus   | 0 | 1 | 0 | 0 | 1 | 0 | 1 | 0 | 0 | 2 | 0 | 0 | 5 |
| Cluster410 | Basidiomycot | Agar  | Boletal | Boletacæ | Xerocomelli | Xerocomellus   | 0 | 1 | 1 | 0 | 0 | 1 | 0 | 0 | 0 | 2 | 0 | 0 | 5 |
| Cluster456 | Basidiomycot | Agar  | Agaricæ | Tricholo | Melanoleuc  | Melanoleuca    | 0 | 1 | 0 | 1 | 0 | 0 | 0 | 0 | 0 | 0 | 0 | 3 | 5 |
| Cluster478 | Basidiomycot | Agar  | Agaricæ | Tricholo | Dendrocolly | Dendrocollyk   | 0 | 0 | 0 | 0 | 0 | 0 | 0 | 2 | 3 | 0 | 0 | 0 | 5 |
| Cluster496 | Basidiomycot | Agar  | Agaricæ | Lyophyll | Asterophor  | Asterophora    | 0 | 3 | 0 | 0 | 0 | 0 | 0 | 0 | 0 | 0 | 0 | 2 | 5 |
| Cluster511 | Basidiomycot | Agar  | Russul  | Russula  | Lactarius   | Lactarius lign | 0 | 0 | 0 | 0 | 0 | 0 | 0 | 2 | 1 | 2 | 0 | 0 | 5 |
| Cluster559 | Basidiomycot | Agar  | Agaricæ | Amanitæ  | Amanita     | Amanita brui   | 0 | 0 | 0 | 2 | 0 | 0 | 1 | 0 | 1 | 0 | 0 | 1 | 5 |
| Cluster561 | Basidiomycot | Agar  | Agaricæ | n        | Inocybe     | Inocybe aff. a | 0 | 1 | 1 | 0 | 0 | 0 | 0 | 0 | 0 | 0 | 1 | 2 | 5 |
| Cluster700 | Basidiomycot | Agar  | Boletal | Boletacæ | Xerocomelli | Xerocomellus   | 0 | 1 | 0 | 2 | 0 | 0 | 0 | 0 | 0 | 0 | 2 | 0 | 5 |
| Cluster703 | Basidiomycot | Agar  | Boletal | Conioph  | Coniophora  | Coniophora p   | 0 | 0 | 1 | 2 | 0 | 0 | 0 | 0 | 0 | 0 | 1 | 1 | 5 |
| Cluster865 | Basidiomycot | Agar  | Agaricæ | Tricholo | Laccaria    | Laccaria ame   | 0 | 0 | 0 | 0 | 1 | 0 | 0 | 3 | 1 | 0 | 0 | 0 | 5 |
| Cluster941 | Basidiomycot | Agar  | Agaricæ | Tricholo | Panellus    | Panellus styp  | 0 | 0 | 0 | 1 | 0 | 0 | 0 | 2 | 2 | 0 | 0 | 0 | 5 |
| Cluster140 | n            | n     | Endogc  | Endogoi  | Endogone    | Endogone pis   | 0 | 1 | 0 | 0 | 0 | 1 | 0 | 0 | 1 | 1 | 0 | 1 | 5 |



|             |               |       |         |          |             |               |         |   |   |   |   |   |   |   |   |   |   |   |   |   |
|-------------|---------------|-------|---------|----------|-------------|---------------|---------|---|---|---|---|---|---|---|---|---|---|---|---|---|
| Cluster174  | n             | n     | Mortie  | Mortier  | Mortierella | Mortierella   | h       | 0 | 1 | 0 | 1 | 0 | 0 | 0 | 0 | 1 | 1 | 1 | 0 | 5 |
| Cluster349  | n             | n     | Mortie  | Mortier  | Mortierella | Mortierella   | s       | 1 | 0 | 0 | 0 | 0 | 0 | 0 | 1 | 2 | 0 | 0 | 1 | 5 |
| Cluster696  | Apicomplexa   | Cocc  | Eucocc  | Eimeriid | n           | Eimeriidae    | s       | 0 | 0 | 1 | 0 | 0 | 1 | 1 | 0 | 0 | 0 | 0 | 1 | 4 |
| Cluster1019 | Apicomplexa   | Cocc  | Eucocc  | Eimeriid | n           | Eimeriidae    | s       | 0 | 1 | 0 | 0 | 0 | 0 | 2 | 0 | 0 | 0 | 0 | 1 | 4 |
| Cluster113  | Ascomycota    | Leca  | n       | Briganti | Brigantiaea | Brigantiaea   | c       | 0 | 0 | 0 | 0 | 0 | 0 | 0 | 0 | 1 | 2 | 1 | 4 |   |
| Cluster172  | Ascomycota    | Leoti | Helotia | n        | Amylocarp   | Amylocarpus   |         | 0 | 1 | 0 | 0 | 0 | 1 | 0 | 2 | 0 | 0 | 0 | 4 |   |
| Cluster181  | Ascomycota    | Euro  | Chaeto  | Herpotr  | Capronia    | Capronia      | fun     | 0 | 0 | 0 | 0 | 0 | 0 | 0 | 0 | 2 | 1 | 1 | 4 |   |
| Cluster245  | Ascomycota    | Leoti | n       | Myxotri  | Pseudogym   | Pseudogymn    |         | 0 | 0 | 2 | 0 | 0 | 0 | 0 | 0 | 0 | 1 | 1 | 4 |   |
| Cluster264  | Ascomycota    | Doth  | n       | n        | Cenococcur  | Cenococcum    |         | 1 | 0 | 1 | 0 | 0 | 0 | 1 | 1 | 0 | 0 | 0 | 4 |   |
| Cluster345  | Ascomycota    | Euro  | Eurotia | Trichocc | Byssochlam  | Byssochlamy   |         | 0 | 1 | 0 | 1 | 2 | 0 | 0 | 0 | 0 | 0 | 0 | 4 |   |
| Cluster898  | Ascomycota    | Leoti | n       | Myxotri  | Byussoascus | Byussoascus   | st      | 0 | 0 | 0 | 0 | 1 | 0 | 0 | 0 | 1 | 2 | 0 | 4 |   |
| Cluster28   | Basidiomycoti | Agar  | Agarica | n        | Inocybe     | Inocybe       | aff. a  | 0 | 2 | 0 | 0 | 0 | 1 | 1 | 0 | 0 | 0 | 0 | 4 |   |
| Cluster39   | Basidiomycoti | Agar  | Boletal | Sclerod  | Scleroderm  | Scleroderma   |         | 3 | 0 | 0 | 0 | 0 | 1 | 0 | 0 | 0 | 0 | 0 | 4 |   |
| Cluster48   | Basidiomycoti | Agar  | Boletal | Sclerod  | Scleroderm  | Scleroderma   |         | 3 | 0 | 0 | 0 | 0 | 1 | 0 | 0 | 0 | 0 | 0 | 4 |   |
| Cluster57   | Basidiomycoti | Agar  | Agarica | Tricholo | Laccaria    | Laccaria      | ame     | 3 | 0 | 0 | 0 | 0 | 0 | 0 | 1 | 0 | 0 | 0 | 4 |   |
| Cluster77   | Basidiomycoti | Agar  | Agarica | n        | Inocybe     | Inocybe       | geop    | 1 | 0 | 0 | 0 | 0 | 2 | 1 | 0 | 0 | 0 | 0 | 4 |   |
| Cluster202  | Basidiomycoti | Agar  | Russula | Russula  | Russula     | Russula       | exalk   | 1 | 0 | 1 | 0 | 0 | 1 | 0 | 0 | 1 | 0 | 0 | 4 |   |
| Cluster205  | Basidiomycoti | n     | Helicot | n        | Helicobasid | Helicobasidiu |         | 0 | 0 | 2 | 0 | 0 | 0 | 0 | 0 | 2 | 0 | 0 | 4 |   |
| Cluster209  | Basidiomycoti | Agar  | Agarica | Tricholo | Laccaria    | Laccaria      | ame     | 0 | 0 | 0 | 0 | 1 | 1 | 0 | 2 | 0 | 0 | 0 | 4 |   |
| Cluster216  | Basidiomycoti | n     | n       | n        | Marchandic  | Marchandior   |         | 0 | 0 | 0 | 0 | 0 | 0 | 1 | 1 | 0 | 0 | 2 | 4 |   |
| Cluster412  | Basidiomycoti | Agar  | Agarica | n        | Inocybe     | Inocybe       | aff. a  | 0 | 1 | 0 | 0 | 1 | 0 | 0 | 0 | 1 | 0 | 1 | 4 |   |
| Cluster484  | Basidiomycoti | Agar  | Athelia | Atheliac | Athelia     | Athelia       | arach   | 0 | 0 | 1 | 3 | 0 | 0 | 0 | 0 | 0 | 0 | 0 | 4 |   |
| Cluster604  | Basidiomycoti | Agar  | Polypo  | Pterulac | Pterula     | Pterula       | echo    | 1 | 1 | 0 | 0 | 0 | 0 | 2 | 0 | 0 | 0 | 0 | 4 |   |
| Cluster628  | Basidiomycoti | Agar  | Agarica | n        | Inocybe     | Inocybe       | geop    | 0 | 0 | 0 | 1 | 0 | 2 | 1 | 0 | 0 | 0 | 0 | 4 |   |
| Cluster764  | Basidiomycoti | Agar  | Boletal | Boletac  | Chalciporus | Chalciporus   | p       | 0 | 1 | 1 | 0 | 1 | 0 | 0 | 0 | 1 | 0 | 0 | 4 |   |
| Cluster857  | Basidiomycoti | Agar  | Jaapial | Jaapiace | Jaapia      | Jaapia        | argilla | 0 | 2 | 1 | 0 | 0 | 0 | 0 | 0 | 0 | 1 | 0 | 4 |   |
| Cluster900  | Basidiomycoti | Agar  | Jaapial | Jaapiace | Jaapia      | Jaapia        | argilla | 0 | 1 | 0 | 1 | 0 | 0 | 0 | 0 | 0 | 2 | 0 | 4 |   |
| Cluster924  | Basidiomycoti | Agar  | Boletal | Boletac  | Xerocomelli | Xerocomellu   |         | 0 | 0 | 0 | 0 | 0 | 0 | 1 | 0 | 2 | 1 | 0 | 4 |   |
| Cluster927  | Basidiomycoti | Agar  | Boletal | Boletac  | Xerocomelli | Xerocomellu   |         | 0 | 0 | 0 | 0 | 0 | 1 | 0 | 0 | 2 | 1 | 0 | 4 |   |

|            |              |       |         |          |             |              |         |   |   |   |   |   |   |   |   |   |   |   |
|------------|--------------|-------|---------|----------|-------------|--------------|---------|---|---|---|---|---|---|---|---|---|---|---|
| Cluster961 | Basidiomycot | Agar  | Jaapial | Jaapiace | Jaapia      | Jaapia       | argilla | 0 | 0 | 1 | 3 | 0 | 0 | 0 | 0 | 0 | 0 | 4 |
| Cluster836 | Cryptomycot  | n     | n       | n        | Rozella     | Rozella      | allom   | 0 | 0 | 0 | 0 | 0 | 1 | 3 | 0 | 0 | 0 | 4 |
| Cluster144 | n            | n     | Kickxel | Kickxell | Mycoemilia  | Mycoemilia   | s       | 0 | 0 | 0 | 0 | 2 | 1 | 0 | 1 | 0 | 0 | 4 |
| Cluster262 | n            | n     | n       | Nucleari | Nuclearia   | Nuclearia    | the     | 0 | 0 | 0 | 3 | 0 | 1 | 0 | 0 | 0 | 0 | 4 |
| Cluster420 | n            | Spirc | Sporad  | Oxytrich | Protogastro | Protogastro  | s       | 0 | 0 | 1 | 2 | 0 | 0 | 0 | 0 | 0 | 1 | 4 |
| Cluster566 | n            | n     | Mortie  | Mortier  | Mortierella | Mortierella  | s       | 0 | 0 | 0 | 0 | 2 | 0 | 1 | 0 | 0 | 0 | 4 |
| Cluster878 | n            | Spirc | Sporad  | Oxytrich | Protogastro | Protogastro  | s       | 0 | 0 | 2 | 1 | 0 | 0 | 1 | 0 | 0 | 0 | 4 |
| Cluster197 | Nematoda     | Chro  | Araeol  | Rhabdoi  | Rhabdolair  | Rhabdolaimu  |         | 0 | 0 | 0 | 1 | 0 | 1 | 0 | 1 | 0 | 0 | 4 |
| Cluster980 | Apicomplexa  | Cocc  | Eucocc  | Eimeriid | n           | Eimeriidae   | sp      | 0 | 0 | 0 | 1 | 1 | 1 | 0 | 0 | 0 | 0 | 3 |
| Cluster127 | Ascomycota   | Leoti | n       | Myxotri  | Byussoascus | Byussoascus  | s       | 2 | 0 | 0 | 0 | 0 | 0 | 0 | 0 | 0 | 0 | 3 |
| Cluster145 | Ascomycota   | Sord  | Glome   | Plectos  | Plectospha  | Plectosphaer |         | 2 | 0 | 0 | 0 | 0 | 0 | 0 | 1 | 0 | 0 | 3 |
| Cluster229 | Ascomycota   | Sord  | Ophios  | Ophiost  | Grosmanni   | Grosmannia   |         | 0 | 0 | 0 | 0 | 0 | 0 | 1 | 0 | 1 | 1 | 3 |
| Cluster270 | Ascomycota   | Sord  | Hypocr  | Hypocre  | Hypocrea    | Hypocrea     | lac     | 1 | 0 | 0 | 0 | 2 | 0 | 0 | 0 | 0 | 0 | 3 |
| Cluster305 | Ascomycota   | Doth  | n       | n        | Cenococcur  | Cenococcum   |         | 0 | 0 | 0 | 0 | 1 | 0 | 0 | 0 | 0 | 1 | 3 |
| Cluster421 | Ascomycota   | Saccl | Saccha  | n        | Blastobotry | Blastobotrys |         | 0 | 0 | 0 | 0 | 0 | 0 | 0 | 0 | 1 | 0 | 3 |
| Cluster904 | Ascomycota   | Arch  | Archae  | Archae   | Archaeorhiz | Archaeorhiz  | c       | 0 | 0 | 2 | 1 | 0 | 0 | 0 | 0 | 0 | 0 | 3 |
| Cluster957 | Ascomycota   | Doth  | n       | n        | Cenococcur  | Cenococcum   |         | 1 | 0 | 0 | 0 | 1 | 0 | 0 | 0 | 0 | 1 | 3 |
| Cluster25  | Basidiomycot | Agar  | Agaric  | Amanit   | Amanita     | Amanita      | brui    | 1 | 1 | 0 | 0 | 0 | 1 | 0 | 0 | 0 | 0 | 3 |
| Cluster32  | Basidiomycot | Agar  | Russul  | Russula  | Russula     | Russula      | exalk   | 1 | 0 | 0 | 0 | 1 | 1 | 0 | 0 | 0 | 0 | 3 |
| Cluster49  | Basidiomycot | Agar  | Russul  | Russula  | Russula     | Russula      | exalk   | 0 | 0 | 0 | 0 | 0 | 0 | 0 | 0 | 2 | 1 | 3 |
| Cluster53  | Basidiomycot | Agar  | Agaric  | n        | Inocybe     | Inocybe      | geop    | 0 | 0 | 0 | 0 | 2 | 0 | 0 | 1 | 0 | 0 | 3 |
| Cluster58  | Basidiomycot | Agar  | Agaric  | Amanit   | Amanita     | Amanita      | brui    | 1 | 0 | 0 | 1 | 0 | 0 | 0 | 0 | 0 | 1 | 3 |
| Cluster60  | Basidiomycot | Agar  | Agaric  | Tricholo | Laccaria    | Laccaria     | ame     | 2 | 0 | 0 | 0 | 0 | 0 | 0 | 1 | 0 | 0 | 3 |
| Cluster80  | Basidiomycot | Agar  | Boletal | Boletac  | Xerocomell  | Xerocomellu  |         | 0 | 0 | 1 | 0 | 1 | 0 | 0 | 0 | 0 | 0 | 3 |
| Cluster110 | Basidiomycot | Agar  | Trechis | Trechis  | Trechispora | Trechispora  | a       | 0 | 1 | 0 | 1 | 0 | 0 | 0 | 0 | 0 | 0 | 3 |
| Cluster121 | Basidiomycot | n     | n       | n        | Marchandic  | Marchandior  |         | 3 | 0 | 0 | 0 | 0 | 0 | 0 | 0 | 0 | 0 | 3 |
| Cluster126 | Basidiomycot | Agar  | Russul  | Stereac  | Amylostere  | Amylostereu  |         | 0 | 0 | 0 | 0 | 0 | 0 | 0 | 2 | 1 | 0 | 3 |
| Cluster139 | Basidiomycot | Agar  | Thelep  | Theleph  | Thelephora  | Thelephora   | s       | 0 | 0 | 0 | 0 | 0 | 0 | 0 | 0 | 0 | 1 | 3 |
| Cluster163 | Basidiomycot | Agar  | Agaric  | Amanit   | Amanita     | Amanita      | brui    | 0 | 0 | 0 | 0 | 0 | 0 | 0 | 2 | 0 | 0 | 3 |

|             |              |       |         |            |             |               |        |   |   |   |   |   |   |   |   |   |   |   |   |   |   |
|-------------|--------------|-------|---------|------------|-------------|---------------|--------|---|---|---|---|---|---|---|---|---|---|---|---|---|---|
| Cluster192  | Basidiomycot | Agar  | Agaricæ | Amanita    | Amanita     | Amanita       | brui   | 0 | 1 | 0 | 0 | 2 | 0 | 0 | 0 | 0 | 0 | 0 | 0 | 3 |   |
| Cluster319  | Basidiomycot | Ento  | Entorrh | Entorrhiza | Entorrhiza  | as            |        | 0 | 0 | 0 | 0 | 0 | 0 | 3 | 0 | 0 | 0 | 0 | 0 | 3 |   |
| Cluster328  | Basidiomycot | Agar  | Agaricæ | Marasm     | Chaetocala  | Chaetocalath  |        | 0 | 0 | 1 | 0 | 0 | 1 | 0 | 0 | 0 | 0 | 0 | 1 | 3 |   |
| Cluster356  | Basidiomycot | Agar  | Russulæ | Russula    | Lactarius   | Lactarius     | dec    | 1 | 0 | 1 | 0 | 0 | 1 | 0 | 0 | 0 | 0 | 0 | 0 | 3 |   |
| Cluster375  | Basidiomycot | Agar  | Boletal | Gyropor    | Gyroporus   | Gyroporus     | cy     | 1 | 0 | 0 | 0 | 0 | 0 | 0 | 1 | 1 | 0 | 0 | 0 | 3 |   |
| Cluster422  | Basidiomycot | Agar  | Agaricæ | Marasm     | Moniliophtl | Moniliophtl   |        | 0 | 0 | 0 | 0 | 0 | 1 | 0 | 0 | 2 | 0 | 0 | 0 | 3 |   |
| Cluster442  | Basidiomycot | Agar  | Agaricæ | Tricholo   | Dendrocolly | Dendrocollyk  |        | 0 | 0 | 0 | 0 | 0 | 1 | 0 | 1 | 1 | 0 | 0 | 0 | 3 |   |
| Cluster452  | Basidiomycot | Agar  | Agaricæ | n          | Inocybe     | Inocybe       | geop   | 0 | 1 | 0 | 0 | 0 | 0 | 2 | 0 | 0 | 0 | 0 | 0 | 3 |   |
| Cluster519  | Basidiomycot | Agar  | Boletal | Hygropt    | Hygrophorc  | Hygrophorop   |        | 0 | 2 | 0 | 1 | 0 | 0 | 0 | 0 | 0 | 0 | 0 | 0 | 3 |   |
| Cluster581  | Basidiomycot | Agar  | Agaricæ | Amanita    | Amanita     | Amanita       | mus    | 0 | 1 | 0 | 0 | 0 | 0 | 0 | 0 | 0 | 1 | 1 | 0 | 3 |   |
| Cluster607  | Basidiomycot | Agar  | Agaricæ | Tricholo   | Camarophy   | Camarophylli  |        | 0 | 0 | 0 | 0 | 1 | 0 | 1 | 0 | 1 | 0 | 0 | 0 | 3 |   |
| Cluster664  | Basidiomycot | Agar  | Agaricæ | n          | Inocybe     | Inocybe       | aff. a | 0 | 0 | 0 | 0 | 0 | 1 | 0 | 0 | 0 | 0 | 1 | 1 | 3 |   |
| Cluster666  | Basidiomycot | Agar  | Boletal | Sclerodæ   | Scleroderm  | Scleroderma   |        | 0 | 0 | 0 | 0 | 1 | 0 | 2 | 0 | 0 | 0 | 0 | 0 | 3 |   |
| Cluster706  | Basidiomycot | Agar  | Athelia | Atheliac   | Athelia     | Athelia       | arach  | 0 | 1 | 1 | 1 | 0 | 0 | 0 | 0 | 0 | 0 | 0 | 0 | 3 |   |
| Cluster719  | Basidiomycot | Agar  | Athelia | Atheliac   | Piloderma   | Piloderma     | fa     | 0 | 0 | 1 | 0 | 0 | 0 | 0 | 0 | 0 | 0 | 0 | 2 | 3 |   |
| Cluster729  | Basidiomycot | Agar  | Agaricæ | n          | Inocybe     | Inocybe       | geop   | 0 | 0 | 0 | 0 | 0 | 0 | 3 | 0 | 0 | 0 | 0 | 0 | 3 |   |
| Cluster732  | Basidiomycot | Agar  | Agaricæ | Bolbitia   | Bolbitius   | Bolbitius     | vite   | 0 | 0 | 0 | 0 | 0 | 0 | 1 | 1 | 0 | 0 | 1 | 0 | 3 |   |
| Cluster736  | Basidiomycot | Agar  | Agaricæ | Tricholo   | Dendrocolly | Dendrocollyk  |        | 0 | 0 | 0 | 0 | 0 | 0 | 0 | 1 | 2 | 0 | 0 | 0 | 3 |   |
| Cluster747  | Basidiomycot | Agar  | Russulæ | Russula    | Russula     | Russula       | exalk  | 0 | 0 | 1 | 0 | 0 | 0 | 0 | 0 | 2 | 0 | 0 | 0 | 3 |   |
| Cluster780  | Basidiomycot | Agar  | Polypo  | Auriscal   | Lentinellus | Lentinellus   | u      | 0 | 0 | 0 | 0 | 0 | 0 | 0 | 1 | 0 | 0 | 1 | 1 | 3 |   |
| Cluster818  | Basidiomycot | Agar  | Boletal | Boletacæ   | Xerocomell  | Xerocomellu:  |        | 0 | 0 | 0 | 0 | 1 | 0 | 0 | 0 | 0 | 1 | 1 | 0 | 3 |   |
| Cluster845  | Basidiomycot | Agar  | Athelia | Atheliac   | Amphinemæ   | Amphinema     |        | 0 | 0 | 0 | 1 | 0 | 0 | 0 | 0 | 0 | 0 | 0 | 1 | 1 | 3 |
| Cluster931  | Basidiomycot | Agar  | Boletal | Boletacæ   | Xerocomell  | Xerocomellu:  |        | 0 | 0 | 0 | 0 | 0 | 0 | 0 | 0 | 0 | 3 | 0 | 0 | 3 |   |
| Cluster1055 | Basidiomycot | Agar  | Agaricæ | Tricholo   | Pleurocybel | Pleurocybellæ |        | 0 | 0 | 0 | 0 | 0 | 0 | 0 | 0 | 0 | 0 | 0 | 2 | 1 | 3 |
| Cluster324  | Blastoclador | Blast | Blastoc | Catenar    | Catenomyc   | Catenomyces   |        | 0 | 0 | 1 | 0 | 0 | 0 | 1 | 0 | 0 | 0 | 0 | 0 | 1 | 3 |
| Cluster236  | Glomeromyc   | Glon  | Diversi | Acaulos    | Acaulosporæ | Acaulospora   |        | 0 | 0 | 0 | 1 | 0 | 0 | 0 | 0 | 0 | 2 | 0 | 0 | 3 |   |
| Cluster31   | n            | n     | Mortie  | Mortieræ   | Mortierella | Mortierella   | h      | 0 | 1 | 1 | 0 | 0 | 0 | 0 | 0 | 0 | 0 | 0 | 1 | 0 | 3 |
| Cluster196  | n            | n     | Kickxel | Kickxellæ  | Spiromyces  | Spiromyces    | n      | 0 | 2 | 0 | 0 | 0 | 0 | 0 | 0 | 0 | 0 | 0 | 0 | 1 | 3 |
| Cluster233  | n            | n     | Mortie  | Mortieræ   | Mortierella | Mortierella   | p      | 0 | 1 | 0 | 0 | 1 | 0 | 0 | 0 | 0 | 0 | 1 | 0 | 0 | 3 |

|             |               |       |         |           |             |                |              |   |   |   |   |   |   |   |   |   |   |   |
|-------------|---------------|-------|---------|-----------|-------------|----------------|--------------|---|---|---|---|---|---|---|---|---|---|---|
| Cluster261  | n             | n     | Mucor:  | n         | Umbelopsis  | Umbelopsis r   | 0            | 0 | 1 | 0 | 1 | 1 | 0 | 0 | 0 | 0 | 0 | 3 |
| Cluster383  | n             | n     | Endog:  | Endog:    | Endogone    | Endogone pi    | 0            | 1 | 2 | 0 | 0 | 0 | 0 | 0 | 0 | 0 | 0 | 3 |
| Cluster403  | n             | n     | n       | Nuclear:  | Nuclearia   | Nuclearia the  | 0            | 0 | 1 | 0 | 1 | 0 | 0 | 0 | 1 | 0 | 0 | 3 |
| Cluster465  | n             | n     | Mucor:  | n         | Umbelopsis  | Umbelopsis r   | 0            | 1 | 0 | 0 | 0 | 0 | 0 | 1 | 0 | 0 | 0 | 3 |
| Cluster849  | n             | n     | Mortie  | Mortier:  | Mortierella | Mortierella s  | 0            | 0 | 0 | 2 | 0 | 1 | 0 | 0 | 0 | 0 | 0 | 3 |
| Cluster919  | n             | n     | Mortie  | Mortier:  | Mortierella | Mortierella p  | 0            | 0 | 0 | 1 | 0 | 0 | 0 | 0 | 1 | 0 | 1 | 3 |
| Cluster990  | n             |       | Spirc   | Sporad    | Oxytrich:   | n              | Oxytrichidae | 0 | 0 | 0 | 0 | 1 | 0 | 0 | 1 | 0 | 0 | 3 |
| Cluster1049 | n             | n     | Mortie  | Mortier:  | Dissophora  | Dissophora d   | 1            | 0 | 0 | 0 | 1 | 0 | 0 | 0 | 0 | 1 | 0 | 3 |
| Cluster232  | Platyhelminth | Turb  | Lecithc | Prorhyn   | Geocentro:  | Geocentroph    | 0            | 1 | 1 | 1 | 0 | 0 | 0 | 0 | 0 | 0 | 0 | 3 |
| Cluster4    | Ascomycota    | Doth  | n       | n         | Cenococcur  | Cenococcum     | 1            | 0 | 0 | 0 | 0 | 0 | 1 | 0 | 0 | 0 | 0 | 2 |
| Cluster33   | Ascomycota    | Leoti | n       | Myxotri:  | Byussoascus | Byussoascus st | 0            | 0 | 0 | 0 | 0 | 0 | 0 | 0 | 1 | 1 | 0 | 2 |
| Cluster98   | Ascomycota    | Saccl | Saccha  | n         | Candida     | Candida sp. E  | 0            | 0 | 0 | 2 | 0 | 0 | 0 | 0 | 0 | 0 | 0 | 2 |
| Cluster111  | Ascomycota    | Leoti | n       | n         | Xylogone    | Xylogone gar   | 0            | 0 | 0 | 0 | 2 | 0 | 0 | 0 | 0 | 0 | 0 | 2 |
| Cluster159  | Ascomycota    | n     | n       | n         | Eladia      | Eladia sacculi | 0            | 0 | 0 | 0 | 1 | 0 | 0 | 0 | 0 | 1 | 0 | 2 |
| Cluster228  | Ascomycota    | Leoti | n       | Myxotri:  | Byussoascus | Byussoascus st | 0            | 0 | 0 | 2 | 0 | 0 | 0 | 0 | 0 | 0 | 0 | 2 |
| Cluster276  | Ascomycota    | Doth  | Botryo  | Botryos:  | Lasiodiplod | Lasiodiplodia  | 0            | 0 | 2 | 0 | 0 | 0 | 0 | 0 | 0 | 0 | 0 | 2 |
| Cluster279  | Ascomycota    | Doth  | Pleosp  | Melano:   | Herpotrichi | Herpotrichia   | 0            | 1 | 0 | 0 | 0 | 0 | 0 | 0 | 0 | 0 | 1 | 2 |
| Cluster284  | Ascomycota    | Leoti | Helotia | Hyalosc:  | Lachnum     | Lachnum scl    | 0            | 0 | 0 | 0 | 0 | 0 | 2 | 0 | 0 | 0 | 0 | 2 |
| Cluster371  | Ascomycota    | Doth  | n       | n         | Cenococcur  | Cenococcum     | 0            | 0 | 0 | 0 | 0 | 0 | 0 | 0 | 1 | 1 | 0 | 2 |
| Cluster397  | Ascomycota    | Sord  | Hypocr  | Clavicipi | Metarhiziu  | Metarhizium    | 0            | 0 | 0 | 0 | 0 | 0 | 0 | 0 | 0 | 0 | 2 | 2 |
| Cluster439  | Ascomycota    | Leoti | n       | Myxotri:  | Pseudogym   | Pseudogymn     | 0            | 1 | 0 | 0 | 0 | 0 | 0 | 0 | 0 | 0 | 1 | 2 |
| Cluster453  | Ascomycota    | Doth  | Dothid  | Dothior:  | Aureobasid  | Aureobasidiu   | 0            | 1 | 0 | 0 | 0 | 0 | 0 | 0 | 0 | 1 | 0 | 2 |
| Cluster458  | Ascomycota    | Leoti | n       | Myxotri:  | Byussoascus | Byussoascus st | 0            | 0 | 0 | 0 | 0 | 0 | 0 | 0 | 0 | 0 | 1 | 2 |
| Cluster544  | Ascomycota    | Peziz | Pezizal | Discinac  | Gyromitra   | Gyromitra es   | 0            | 0 | 0 | 0 | 0 | 0 | 0 | 0 | 2 | 0 | 0 | 2 |
| Cluster588  | Ascomycota    | Leoti | n       | Erysiph:  | Cystotheca  | Cystotheca w   | 0            | 0 | 0 | 0 | 0 | 0 | 0 | 0 | 2 | 0 | 0 | 2 |
| Cluster640  | Ascomycota    | Sord  | Ophios  | Ophiost:  | Grosmanni:  | Grosmannia     | 0            | 0 | 0 | 0 | 1 | 0 | 0 | 0 | 0 | 0 | 1 | 2 |
| Cluster669  | Ascomycota    | n     | n       | n         | n           | ascomycete s   | 0            | 0 | 0 | 0 | 0 | 0 | 0 | 0 | 0 | 0 | 1 | 2 |
| Cluster672  | Ascomycota    | Euro  | Eurotia | Trichocc  | Penicillium | Penicillium sp | 0            | 1 | 0 | 0 | 0 | 0 | 0 | 0 | 0 | 1 | 0 | 2 |
| Cluster724  | Ascomycota    | Leoti | Helotia | Leotiace  | Neobulgari: | Neobulgaria    | 0            | 0 | 0 | 1 | 0 | 0 | 0 | 0 | 1 | 0 | 0 | 2 |





|            |              |       |         |          |             |              |     |   |   |   |   |   |   |   |   |   |   |   |   |   |
|------------|--------------|-------|---------|----------|-------------|--------------|-----|---|---|---|---|---|---|---|---|---|---|---|---|---|
| Cluster273 | n            | n     | Mortie  | Mortier  | Mortierella | Mortierella  | s   | 0 | 0 | 0 | 0 | 0 | 0 | 0 | 1 | 0 | 1 | 2 |   |   |
| Cluster308 | n            | n     | Endogr  | Endogor  | Endogone    | Endogone     | pis | 0 | 0 | 1 | 0 | 0 | 0 | 1 | 0 | 0 | 0 | 2 |   |   |
| Cluster317 | n            | n     | Entom   | Basidiok | Basidiobolu | Basidiobolus |     | 1 | 0 | 0 | 0 | 1 | 0 | 0 | 0 | 0 | 0 | 2 |   |   |
| Cluster332 | n            | Spirc | Urostyl | Pseudoi  | Pseudouros  | Pseudourosty |     | 0 | 0 | 0 | 0 | 0 | 0 | 0 | 0 | 1 | 1 | 0 | 2 |   |
| Cluster334 | n            | n     | Cercon  | Heteron  | Heteromita  | Heteromita   | g   | 0 | 0 | 1 | 0 | 0 | 0 | 0 | 0 | 0 | 1 | 0 | 2 |   |
| Cluster394 | n            | n     | Endogr  | Endogor  | Endogone    | Endogone     | lac | 0 | 0 | 0 | 0 | 0 | 0 | 0 | 1 | 0 | 1 | 0 | 2 |   |
| Cluster426 | n            | n     | n       | n        | n           | Cercozoa     | sp. | 0 | 0 | 0 | 0 | 0 | 2 | 0 | 0 | 0 | 0 | 0 | 2 |   |
| Cluster432 | n            | n     | Mortie  | Mortier  | Dissophora  | Dissophora   | d   | 0 | 0 | 0 | 1 | 0 | 0 | 0 | 0 | 1 | 0 | 0 | 2 |   |
| Cluster469 | n            | Spirc | Sporad  | Oxytrich | Protogastro | Protogastro  | s   | 0 | 0 | 1 | 1 | 0 | 0 | 0 | 0 | 0 | 0 | 0 | 2 |   |
| Cluster473 | n            | n     | Mucor   | n        | Umbelopsis  | Umbelopsis   | r   | 0 | 0 | 1 | 0 | 0 | 0 | 1 | 0 | 0 | 0 | 0 | 2 |   |
| Cluster477 | n            | n     | n       | Nuclear  | Nuclearia   | Nuclearia    | the | 0 | 0 | 1 | 0 | 0 | 1 | 0 | 0 | 0 | 0 | 0 | 2 |   |
| Cluster631 | n            | n     | Mortie  | Mortier  | Dissophora  | Dissophora   | d   | 0 | 0 | 0 | 0 | 0 | 0 | 0 | 0 | 0 | 0 | 2 | 2 |   |
| Cluster659 | n            | n     | n       | Vampyr   | Arachnula   | Arachnula    | im  | 0 | 0 | 0 | 1 | 0 | 0 | 0 | 1 | 0 | 0 | 0 | 2 |   |
| Cluster661 | n            | n     | Cercon  | n        | Spongomor   | Spongomona   |     | 0 | 0 | 0 | 0 | 0 | 0 | 0 | 1 | 0 | 0 | 1 | 0 | 2 |
| Cluster687 | n            | n     | Euglypl | Euglyph  | Assulina    | Assulina     | mus | 0 | 0 | 1 | 0 | 0 | 0 | 0 | 0 | 1 | 0 | 0 | 0 | 2 |
| Cluster745 | n            | n     | Mortie  | Mortier  | Mortierella | Mortierella  | p   | 0 | 0 | 1 | 0 | 1 | 0 | 0 | 0 | 0 | 0 | 0 | 0 | 2 |
| Cluster796 | n            | n     | Cercon  | Cercom   | Paracercom  | Paracercomo  |     | 0 | 0 | 2 | 0 | 0 | 0 | 0 | 0 | 0 | 0 | 0 | 0 | 2 |
| Cluster797 | n            | n     | Euglypl | Euglyph  | Assulina    | Assulina     | mus | 0 | 1 | 1 | 0 | 0 | 0 | 0 | 0 | 0 | 0 | 0 | 0 | 2 |
| Cluster804 | n            | n     | Mucor   | n        | Umbelopsis  | Umbelopsis   | r   | 0 | 0 | 0 | 0 | 0 | 0 | 0 | 0 | 1 | 0 | 1 | 0 | 2 |
| Cluster835 | n            | n     | Choan   | Codono   | Monosiga    | Monosiga     | ov  | 0 | 0 | 0 | 0 | 0 | 0 | 0 | 0 | 0 | 0 | 2 | 0 | 2 |
| Cluster852 | n            | n     | Mortie  | Mortier  | Mortierella | Mortierella  | h   | 0 | 0 | 0 | 1 | 0 | 0 | 0 | 0 | 0 | 0 | 0 | 1 | 2 |
| Cluster866 | n            | n     | Mortie  | Mortier  | Mortierella | Mortierella  | p   | 0 | 0 | 1 | 0 | 0 | 0 | 0 | 0 | 0 | 0 | 1 | 0 | 2 |
| Cluster973 | n            | n     | Endogr  | Endogor  | Endogone    | Endogone     | pis | 0 | 1 | 0 | 0 | 0 | 0 | 0 | 0 | 0 | 0 | 0 | 1 | 2 |
| Cluster415 | Platyhelmint | Turb  | Lecithc | Prorhyn  | Geocentro   | Geocentroph  |     | 0 | 0 | 0 | 2 | 0 | 0 | 0 | 0 | 0 | 0 | 0 | 0 | 2 |
| Cluster517 | Platyhelmint | Turb  | Rhabd   | Typhlop  | Phaenocora  | Phaenocora   | l   | 0 | 0 | 1 | 0 | 1 | 0 | 0 | 0 | 0 | 0 | 0 | 0 | 2 |
| Cluster249 | Annelida     | n     | Haplot  | Megasc   | Achaeta     | Achaeta      | cam | 0 | 0 | 1 | 0 | 0 | 0 | 0 | 0 | 0 | 0 | 0 | 0 | 1 |
| Cluster364 | Annelida     | Polyc | Phylloc | Syllidae | Typosyllis  | Typosyllis   | bel | 0 | 0 | 1 | 0 | 0 | 0 | 0 | 0 | 0 | 0 | 0 | 0 | 1 |
| Cluster406 | Annelida     | Polyc | Phylloc | Syllidae | Typosyllis  | Typosyllis   | bel | 0 | 0 | 0 | 0 | 0 | 0 | 0 | 0 | 0 | 0 | 0 | 0 | 1 |
| Cluster834 | Annelida     | n     | n       | n        | Hrabeiella  | Hrabeiella   | pe  | 0 | 0 | 0 | 0 | 0 | 0 | 0 | 1 | 0 | 0 | 0 | 0 | 1 |





|            |            |       |         |          |              |                |   |   |   |   |   |   |   |   |   |   |   |   |   |
|------------|------------|-------|---------|----------|--------------|----------------|---|---|---|---|---|---|---|---|---|---|---|---|---|
| Cluster369 | Ascomycota | Doth  | Capno   | Mycosp   | Mycosphae    | Mycosphaer     | 0 | 0 | 0 | 0 | 0 | 0 | 1 | 0 | 0 | 0 | 0 | 0 | 1 |
| Cluster374 | Ascomycota | Doth  | n       | n        | Cenococcur   | Cenococcum     | 0 | 0 | 0 | 0 | 0 | 0 | 0 | 0 | 0 | 1 | 0 | 0 | 1 |
| Cluster459 | Ascomycota | Peziz | Pezizal | Discinac | Gyromitra    | Gyromitra es   | 0 | 0 | 0 | 0 | 0 | 0 | 0 | 0 | 1 | 0 | 0 | 0 | 1 |
| Cluster530 | Ascomycota | Peziz | Pezizal | Tuberac  | Reddellomy   | Reddellomyc    | 0 | 0 | 0 | 1 | 0 | 0 | 0 | 0 | 0 | 0 | 0 | 0 | 1 |
| Cluster531 | Ascomycota | Peziz | Pezizal | Tuberac  | Labyrinhor   | Labyrinthom'   | 0 | 0 | 1 | 0 | 0 | 0 | 0 | 0 | 0 | 0 | 0 | 0 | 1 |
| Cluster548 | Ascomycota | Sord  | Ophios  | Ophiost  | Grosmanni    | Grosmannia     | 0 | 0 | 0 | 0 | 0 | 0 | 0 | 0 | 0 | 0 | 1 | 0 | 1 |
| Cluster564 | Ascomycota | Peziz | Pezizal | Pyroner  | Leucoscyph   | Leucoscypha    | 0 | 0 | 0 | 0 | 0 | 0 | 0 | 0 | 0 | 0 | 0 | 1 | 1 |
| Cluster575 | Ascomycota | Leoti | n       | Myxotri  | Byussoascus  | Byussoascus st | 0 | 0 | 0 | 0 | 0 | 0 | 0 | 0 | 0 | 0 | 0 | 1 | 1 |
| Cluster580 | Ascomycota | Doth  | n       | n        | Cenococcur   | Cenococcum     | 0 | 0 | 1 | 0 | 0 | 0 | 0 | 0 | 0 | 0 | 0 | 0 | 1 |
| Cluster589 | Ascomycota | Euro  | Eurotia | Trichocc | Paecilomyce  | Paecilomyces   | 0 | 0 | 0 | 0 | 1 | 0 | 0 | 0 | 0 | 0 | 0 | 0 | 1 |
| Cluster601 | Ascomycota | Sord  | Ophios  | Ophiost  | Grosmanni    | Grosmannia     | 0 | 0 | 0 | 0 | 0 | 0 | 0 | 0 | 0 | 0 | 1 | 0 | 1 |
| Cluster616 | Ascomycota | Geog  | Geoglo  | Geoglos  | Trichoglossi | Trichoglossur  | 0 | 0 | 0 | 0 | 0 | 0 | 0 | 0 | 0 | 1 | 0 | 0 | 1 |
| Cluster617 | Ascomycota | Doth  | n       | n        | Cenococcur   | Cenococcum     | 0 | 0 | 0 | 0 | 0 | 0 | 0 | 0 | 0 | 1 | 0 | 0 | 1 |
| Cluster629 | Ascomycota | Saccl | Saccha  | Dipodas  | Geotrichurr  | Geotrichum l   | 0 | 0 | 0 | 0 | 0 | 1 | 0 | 0 | 0 | 0 | 0 | 0 | 1 |
| Cluster630 | Ascomycota | Sord  | Hypocr  | Hypocre  | Hypocrea     | Hypocrea lac   | 0 | 0 | 0 | 0 | 1 | 0 | 0 | 0 | 0 | 0 | 0 | 0 | 1 |
| Cluster639 | Ascomycota | n     | n       | n        | n            | Ascomycota :   | 0 | 0 | 1 | 0 | 0 | 0 | 0 | 0 | 0 | 0 | 0 | 0 | 1 |
| Cluster642 | Ascomycota | Sord  | Hypocr  | Hypocre  | Hypomyces    | Hypomyces c    | 0 | 0 | 0 | 0 | 0 | 0 | 0 | 0 | 0 | 1 | 0 | 0 | 1 |
| Cluster678 | Ascomycota | Leoti | n       | Myxotri  | Byussoascus  | Byussoascus st | 0 | 0 | 0 | 0 | 1 | 0 | 0 | 0 | 0 | 0 | 0 | 0 | 1 |
| Cluster680 | Ascomycota | Sord  | Xylaria | Xylariac | Ascotricha   | Ascotricha lu  | 0 | 0 | 0 | 0 | 0 | 0 | 0 | 0 | 0 | 0 | 0 | 1 | 1 |
| Cluster691 | Ascomycota | Sord  | Magna   | Magnap   | Phialophora  | Phialophora :  | 0 | 0 | 0 | 0 | 0 | 0 | 0 | 0 | 0 | 0 | 1 | 0 | 1 |
| Cluster710 | Ascomycota | Pneu  | Pneum   | Pneumc   | Pneumocys    | Pneumocysti    | 0 | 0 | 0 | 0 | 0 | 1 | 0 | 0 | 0 | 0 | 0 | 0 | 1 |
| Cluster720 | Ascomycota | Doth  | Dothid  | Dothide  | Dothidea     | Dothidea hip   | 0 | 0 | 0 | 0 | 0 | 0 | 0 | 0 | 0 | 0 | 1 | 0 | 1 |
| Cluster765 | Ascomycota | Leoti | n       | Myxotri  | Pseudogym    | Pseudogymn     | 0 | 0 | 0 | 0 | 0 | 0 | 0 | 0 | 1 | 0 | 0 | 0 | 1 |
| Cluster779 | Ascomycota | Arch  | Archae  | Archaec  | Archaeorhiz  | Archaeorhizc   | 0 | 1 | 0 | 0 | 0 | 0 | 0 | 0 | 0 | 0 | 0 | 0 | 1 |
| Cluster789 | Ascomycota | Arch  | Archae  | Archaec  | Archaeorhiz  | Archaeorhizc   | 0 | 0 | 0 | 1 | 0 | 0 | 0 | 0 | 0 | 0 | 0 | 0 | 1 |
| Cluster792 | Ascomycota | Euro  | Eurotia | Trichocc | Penicillium  | Penicillium fr | 0 | 0 | 1 | 0 | 0 | 0 | 0 | 0 | 0 | 0 | 0 | 0 | 1 |
| Cluster805 | Ascomycota | Leoti | n       | Ascodicl | Pseudopha    | Pseudophaci    | 0 | 0 | 0 | 0 | 0 | 0 | 1 | 0 | 0 | 0 | 0 | 0 | 1 |
| Cluster817 | Ascomycota | Sord  | Hypocr  | Ophiocc  | Ophiocordy   | Ophiocordyc    | 0 | 0 | 0 | 0 | 0 | 0 | 0 | 0 | 0 | 0 | 1 | 0 | 1 |
| Cluster821 | Ascomycota | Peziz | Pezizal | Discinac | Gyromitra    | Gyromitra es   | 0 | 0 | 0 | 0 | 0 | 0 | 1 | 0 | 0 | 0 | 0 | 0 | 1 |









|             |                    |                  |                |                |                |                    |   |   |   |   |   |   |   |   |   |   |   |   |
|-------------|--------------------|------------------|----------------|----------------|----------------|--------------------|---|---|---|---|---|---|---|---|---|---|---|---|
| Cluster923  | Basidiomycota      | Leucosporium     | Leucosporium   | Leucosporium   | Leucosporium   | 0                  | 0 | 0 | 0 | 1 | 0 | 0 | 0 | 0 | 0 | 0 | 0 | 1 |
| Cluster944  | Basidiomycota      | Agaricaceae      | Russula        | Russula        | Lactarius      | Lactarius lignosus | 0 | 0 | 1 | 0 | 0 | 0 | 0 | 0 | 0 | 0 | 0 | 1 |
| Cluster956  | Basidiomycota      | Helicoglyphaceae | Helicobasidium | Helicobasidium | Helicobasidium | 0                  | 0 | 0 | 0 | 0 | 1 | 0 | 0 | 0 | 0 | 0 | 0 | 1 |
| Cluster966  | Basidiomycota      | Agaricaceae      | Boletus        | Scleroderma    | Scleroderma    | Scleroderma        | 0 | 0 | 0 | 0 | 0 | 1 | 0 | 0 | 0 | 0 | 0 | 1 |
| Cluster977  | Basidiomycota      | Agaricaceae      | Boletus        | Boletaceae     | Xerocomus      | Xerocomus          | 0 | 0 | 0 | 0 | 0 | 0 | 0 | 0 | 0 | 1 | 0 | 1 |
| Cluster984  | Basidiomycota      | Agaricaceae      | Boletus        | Boletaceae     | Xerocomus      | Xerocomus          | 0 | 0 | 0 | 1 | 0 | 0 | 0 | 0 | 0 | 0 | 0 | 1 |
| Cluster1006 | Basidiomycota      | Agaricaceae      | Agaricus       | Amanita        | Amanita        | Amanita brunnea    | 0 | 0 | 0 | 0 | 0 | 0 | 0 | 0 | 1 | 0 | 0 | 1 |
| Cluster1018 | Basidiomycota      | Agaricaceae      | Thelephora     | Thelephora     | Thelephora     | Thelephora         | 0 | 0 | 1 | 0 | 0 | 0 | 0 | 0 | 0 | 0 | 0 | 1 |
| Cluster1026 | Basidiomycota      | Agaricaceae      | Tricholoma     | Dendrocollybia | Dendrocollybia | Dendrocollybia     | 0 | 0 | 0 | 0 | 0 | 0 | 0 | 1 | 0 | 0 | 0 | 1 |
| Cluster1028 | Basidiomycota      | Agaricaceae      | Agaricus       | Cortinarius    | Cortinarius    | Cortinarius        | 0 | 0 | 1 | 0 | 0 | 0 | 0 | 0 | 0 | 0 | 0 | 1 |
| Cluster1033 | Basidiomycota      | Trematocarpales  | Cystoderma     | Guehomyces     | Guehomyces     | Guehomyces         | 0 | 0 | 0 | 0 | 0 | 1 | 0 | 0 | 0 | 0 | 0 | 1 |
| Cluster1039 | Basidiomycota      | Agaricaceae      | Russula        | Russula        | Russula        | Russula exalbata   | 0 | 0 | 0 | 0 | 1 | 0 | 0 | 0 | 0 | 0 | 0 | 1 |
| Cluster1044 | Basidiomycota      | Agaricaceae      | Boletus        | Melanogaster   | Melanogaster   | Melanogaster       | 0 | 0 | 0 | 0 | 0 | 0 | 0 | 1 | 0 | 0 | 0 | 1 |
| Cluster1057 | Basidiomycota      | Agaricaceae      | Sebacium       | Sebacium       | Craterocolla   | Craterocolla       | 0 | 1 | 0 | 0 | 0 | 0 | 0 | 0 | 0 | 0 | 0 | 1 |
| Cluster1067 | Basidiomycota      | Agaricaceae      | Agaricus       | Inocybe        | Inocybe        | Inocybe geophylla  | 0 | 0 | 0 | 0 | 0 | 1 | 0 | 0 | 0 | 0 | 0 | 1 |
| Cluster1069 | Basidiomycota      | Agaricaceae      | Boletus        | Scleroderma    | Scleroderma    | Scleroderma        | 0 | 0 | 0 | 0 | 0 | 0 | 1 | 0 | 0 | 0 | 0 | 1 |
| Cluster1075 | Basidiomycota      | Trematocarpales  | Filobasidium   | Cryptococcus   | Cryptococcus   | Cryptococcus       | 0 | 0 | 0 | 0 | 0 | 0 | 0 | 0 | 0 | 1 | 0 | 1 |
| Cluster398  | Blastocladiomycota | Blastocladiaceae | Blastocladium  | Catenomyces    | Catenomyces    | Catenomyces        | 0 | 1 | 0 | 0 | 0 | 0 | 0 | 0 | 0 | 0 | 0 | 1 |
| Cluster1082 | Blastocladiomycota | Blastocladiaceae | Blastocladium  | Catenomyces    | Catenomyces    | Catenomyces        | 0 | 0 | 0 | 1 | 0 | 0 | 0 | 0 | 0 | 0 | 0 | 1 |
| Cluster118  | Chytridiomycota    | Chytriales       | Chytridium     | Chytridium     | Chytridium     | Chytridium         | 1 | 0 | 0 | 0 | 0 | 0 | 0 | 0 | 0 | 0 | 0 | 1 |
| Cluster155  | Chytridiomycota    | Chytriales       | Chytridium     | Chytridium     | Rhizidium      | Rhizidium          | 1 | 0 | 0 | 0 | 0 | 0 | 0 | 0 | 0 | 0 | 0 | 1 |
| Cluster198  | Chytridiomycota    | Chytriales       | Spizellomyces  | Spizellomyces  | Spizellomyces  | Spizellomyces      | 0 | 0 | 0 | 1 | 0 | 0 | 0 | 0 | 0 | 0 | 0 | 1 |
| Cluster387  | Chytridiomycota    | Chytriales       | Chytridium     | Chytridium     | Chytridium     | Chytridium         | 0 | 0 | 0 | 1 | 0 | 0 | 0 | 0 | 0 | 0 | 0 | 1 |
| Cluster395  | Chytridiomycota    | Chytriales       | Chytridium     | Chytridium     | Chytridiales   | Chytridiales       | 0 | 0 | 0 | 0 | 0 | 0 | 0 | 0 | 1 | 0 | 0 | 1 |
| Cluster434  | Chytridiomycota    | Chytriales       | Chytridium     | Chytridium     | Chytridium     | Chytridium         | 0 | 0 | 1 | 0 | 0 | 0 | 0 | 0 | 0 | 0 | 0 | 1 |
| Cluster448  | Chytridiomycota    | Chytriales       | Chytridium     | Chytridium     | Chytridiales   | Chytridiales       | 0 | 0 | 0 | 0 | 0 | 0 | 0 | 0 | 1 | 0 | 0 | 1 |
| Cluster481  | Chytridiomycota    | Chytriales       | Chytridium     | Chytridium     | Rhizidium      | Rhizidium          | 0 | 0 | 0 | 0 | 0 | 0 | 0 | 0 | 1 | 0 | 0 | 1 |
| Cluster518  | Chytridiomycota    | Chytriales       | Rhizophyllum   | Rhizophyllum   | Rhizophyllum   | Rhizophyllum       | 0 | 1 | 0 | 0 | 0 | 0 | 0 | 0 | 0 | 0 | 0 | 1 |
| Cluster593  | Chytridiomycota    | Chytriales       | Spizellomyces  | Spizellomyces  | Rhizophlyctis  | Rhizophlyctis      | 0 | 0 | 0 | 0 | 1 | 0 | 0 | 0 | 0 | 0 | 0 | 1 |

|             |              |      |         |          |             |               |   |   |   |   |   |   |   |   |   |   |   |   |
|-------------|--------------|------|---------|----------|-------------|---------------|---|---|---|---|---|---|---|---|---|---|---|---|
| Cluster605  | Chytridiomyc | Chyt | Chytrid | Chytridi | Chytriomyc  | Chytriomyc    | 0 | 0 | 0 | 0 | 0 | 0 | 0 | 0 | 1 | 0 | 0 | 1 |
| Cluster712  | Chytridiomyc | Chyt | Chytrid | Chytridi | Chytriomyc  | Chytriomyc    | 0 | 0 | 0 | 0 | 0 | 1 | 0 | 0 | 0 | 0 | 0 | 1 |
| Cluster773  | Chytridiomyc | Chyt | Spizell | n        | n           | Spizellomyce  | 0 | 0 | 0 | 0 | 0 | 0 | 0 | 0 | 0 | 0 | 1 | 1 |
| Cluster853  | Chytridiomyc | Chyt | Chytrid | Chytridi | Rhizidium   | Rhizidium en  | 0 | 0 | 0 | 0 | 1 | 0 | 0 | 0 | 0 | 0 | 0 | 1 |
| Cluster862  | Chytridiomyc | Chyt | Rhizop  | Rhizoph  | Rhizophydit | Rhizophydiur  | 0 | 0 | 0 | 0 | 0 | 1 | 0 | 0 | 0 | 0 | 0 | 1 |
| Cluster917  | Chytridiomyc | Chyt | Rhizop  | Rhizoph  | Rhizophydit | Rhizophydiur  | 0 | 0 | 0 | 0 | 0 | 1 | 0 | 0 | 0 | 0 | 0 | 1 |
| Cluster1009 | Chytridiomyc | Chyt | Chytrid | Chytridi | Rhizidium   | Rhizidium en  | 0 | 0 | 0 | 1 | 0 | 0 | 0 | 0 | 0 | 0 | 0 | 1 |
| Cluster1045 | Chytridiomyc | Chyt | Chytrid | Chytridi | Rhizidium   | Rhizidium en  | 0 | 0 | 1 | 0 | 0 | 0 | 0 | 0 | 0 | 0 | 0 | 1 |
| Cluster441  | Cryptomycot  | n    | n       | n        | Rozella     | Rozella allom | 0 | 0 | 0 | 0 | 0 | 0 | 0 | 1 | 0 | 0 | 0 | 1 |
| Cluster960  | Glomeromyc   | Glon | Diversi | Acaulos  | Acaulospor  | Acaulospora   | 0 | 0 | 0 | 1 | 0 | 0 | 0 | 0 | 0 | 0 | 0 | 1 |
| Cluster24   | n            | n    | Cercon  | Cercom   | Paracercom  | Paracercomo   | 1 | 0 | 0 | 0 | 0 | 0 | 0 | 0 | 0 | 0 | 0 | 1 |
| Cluster169  | n            | n    | Mortie  | Mortier  | n           | Mortierellac  | 0 | 0 | 0 | 0 | 0 | 0 | 1 | 0 | 0 | 0 | 0 | 1 |
| Cluster182  | n            | n    | Mortie  | Mortier  | Dissophora  | Dissophora d  | 0 | 0 | 0 | 0 | 0 | 0 | 0 | 0 | 0 | 1 | 0 | 1 |
| Cluster200  | n            | n    | Protost | Protoste | Schizoplasn | Schizoplasmc  | 0 | 0 | 0 | 0 | 0 | 0 | 0 | 0 | 0 | 1 | 0 | 1 |
| Cluster201  | n            | n    | Mortie  | Mortier  | Mortierella | Mortierella p | 0 | 0 | 0 | 0 | 1 | 0 | 0 | 0 | 0 | 0 | 0 | 1 |
| Cluster214  | n            | n    | Bicoso  | Bicosoe  | Bicosoeca   | Bicosoeca pe  | 1 | 0 | 0 | 0 | 0 | 0 | 0 | 0 | 0 | 0 | 0 | 1 |
| Cluster231  | n            | n    | Entom   | Basidiok | Basidiobolu | Basidiobolus  | 0 | 0 | 1 | 0 | 0 | 0 | 0 | 0 | 0 | 0 | 0 | 1 |
| Cluster263  | n            | n    | Endog   | Endogo   | Endogone    | Endogone pi   | 0 | 0 | 0 | 0 | 0 | 0 | 1 | 0 | 0 | 0 | 0 | 1 |
| Cluster267  | n            | n    | Mortie  | Mortier  | Gamsiella   | Gamsiella mu  | 1 | 0 | 0 | 0 | 0 | 0 | 0 | 0 | 0 | 0 | 0 | 1 |
| Cluster281  | n            | n    | Endog   | Endogo   | Endogone    | Endogone pi   | 1 | 0 | 0 | 0 | 0 | 0 | 0 | 0 | 0 | 0 | 0 | 1 |
| Cluster291  | n            | n    | Mortie  | Mortier  | Mortierella | Mortierella s | 0 | 0 | 1 | 0 | 0 | 0 | 0 | 0 | 0 | 0 | 0 | 1 |
| Cluster297  | n            | n    | Endog   | Endogo   | Endogone    | Endogone pi   | 0 | 1 | 0 | 0 | 0 | 0 | 0 | 0 | 0 | 0 | 0 | 1 |
| Cluster344  | n            | n    | Cercon  | Heteron  | n           | Rigidomastix  | 0 | 0 | 0 | 0 | 0 | 0 | 1 | 0 | 0 | 0 | 0 | 1 |
| Cluster354  | n            | n    | Mortie  | Mortier  | Mortierella | Mortierella s | 1 | 0 | 0 | 0 | 0 | 0 | 0 | 0 | 0 | 0 | 0 | 1 |
| Cluster377  | n            | n    | Entom   | Entomo   | Furia       | Furia neopyr  | 0 | 0 | 0 | 0 | 0 | 0 | 0 | 0 | 0 | 1 | 0 | 1 |
| Cluster391  | n            | n    | Mortie  | Mortier  | n           | Mortierellac  | 0 | 0 | 0 | 1 | 0 | 0 | 0 | 0 | 0 | 0 | 0 | 1 |
| Cluster418  | n            | n    | Mucor   | n        | Umbelopsis  | Umbelopsis r  | 0 | 0 | 0 | 0 | 0 | 0 | 1 | 0 | 0 | 0 | 0 | 1 |
| Cluster431  | n            | n    | Mortie  | Mortier  | Mortierella | Mortierella p | 0 | 0 | 1 | 0 | 0 | 0 | 0 | 0 | 0 | 0 | 0 | 1 |
| Cluster464  | n            | n    | Mortie  | Mortier  | Mortierella | Mortierella n | 0 | 0 | 0 | 0 | 1 | 0 | 0 | 0 | 0 | 0 | 0 | 1 |







|            |               |              |              |              |               |               |   |   |   |   |   |   |   |   |   |   |   |   |   |
|------------|---------------|--------------|--------------|--------------|---------------|---------------|---|---|---|---|---|---|---|---|---|---|---|---|---|
| Cluster187 | Platyhelminth | Turbellaria  | Lecithoclada | Prorhynchida | Geocentropoda | Geocentropoda | 0 | 0 | 0 | 0 | 0 | 0 | 0 | 1 | 0 | 0 | 0 | 0 | 1 |
| Cluster949 | Streptophyta  | Zygnematales | Desmidiaceae | Closterium   | Closterium    | Closterium    | 0 | 0 | 0 | 0 | 0 | 0 | 0 | 1 | 0 | 0 | 0 | 0 | 1 |

D/ fungal OTUs based on ITS and associated statistics

| specie                    | OTUID       | H1R | E3BS | E4R | E4BS | H1BS | H2R | H2BS | H4R | H4BS | E2R | E2BS | E3R | sum of the re |
|---------------------------|-------------|-----|------|-----|------|------|-----|------|-----|------|-----|------|-----|---------------|
| Scleroderma citrinum      | Cluster425  | 526 | 0    | 5   | 4    | 245  | 535 | 187  | 189 | 108  | 0   | 0    | 1   | 1800          |
| Atheliales sp             | Cluster1214 | 0   | 3    | 11  | 11   | 2    | 0   | 2    | 2   | 0    | 256 | 249  | 1   | 537           |
| Glioniaceae sp            | Cluster1222 | 46  | 9    | 13  | 7    | 37   | 32  | 23   | 36  | 26   | 168 | 85   | 18  | 500           |
| uncultured Russula        | Cluster386  | 60  | 0    | 2   | 0    | 84   | 64  | 61   | 90  | 112  | 0   | 0    | 1   | 474           |
| Inocybaceae sp            | Cluster839  | 0   | 179  | 12  | 0    | 9    | 0   | 1    | 0   | 1    | 4   | 8    | 237 | 451           |
| Laccaria laccata          | Cluster185  | 24  | 0    | 1   | 0    | 55   | 1   | 2    | 150 | 153  | 0   | 2    | 0   | 388           |
| Atheliales sp             | Cluster828  | 0   | 0    | 189 | 183  | 0    | 0   | 1    | 4   | 0    | 0   | 0    | 0   | 377           |
| Russulaceae sp            | Cluster361  | 3   | 0    | 0   | 1    | 18   | 2   | 3    | 148 | 159  | 1   | 0    | 0   | 335           |
| Amanita rubescens         | Cluster72   | 56  | 32   | 9   | 13   | 85   | 6   | 39   | 22  | 33   | 2   | 1    | 11  | 309           |
| Scleroderma citrinum      | Cluster400  | 81  | 2    | 2   | 1    | 37   | 79  | 45   | 40  | 16   | 0   | 2    | 0   | 305           |
| Inocybaceae sp            | Cluster160  | 15  | 0    | 0   | 1    | 33   | 63  | 167  | 4   | 11   | 0   | 3    | 0   | 297           |
| Inocybaceae sp            | Cluster1007 | 1   | 84   | 6   | 0    | 5    | 0   | 0    | 0   | 0    | 5   | 45   | 124 | 270           |
| Atheliales sp             | Cluster545  | 0   | 71   | 42  | 58   | 7    | 0   | 5    | 0   | 0    | 10  | 7    | 67  | 267           |
| Russulaceae sp            | Cluster431  | 4   | 0    | 1   | 0    | 8    | 23  | 31   | 78  | 71   | 0   | 0    | 1   | 217           |
| Cryptococcus podzolicus   | Cluster1574 | 3   | 23   | 15  | 15   | 4    | 4   | 6    | 7   | 7    | 42  | 27   | 17  | 170           |
| Inocybaceae sp            | Cluster1071 | 0   | 12   | 2   | 0    | 0    | 1   | 0    | 0   | 0    | 25  | 78   | 20  | 138           |
| uncultured fungus         | Cluster874  | 3   | 22   | 6   | 6    | 5    | 8   | 40   | 6   | 12   | 0   | 4    | 18  | 130           |
| Xerocomus badius          | Cluster744  | 0   | 6    | 7   | 4    | 0    | 0   | 1    | 5   | 8    | 53  | 33   | 7   | 124           |
| uncultured fungus         | Cluster1154 | 8   | 7    | 18  | 16   | 7    | 2   | 15   | 6   | 10   | 10  | 18   | 3   | 120           |
| Inocybe assimilata        | Cluster1003 | 0   | 14   | 11  | 12   | 1    | 27  | 40   | 0   | 0    | 0   | 0    | 1   | 106           |
| Archaeorhizomyces finlayi | Cluster1657 | 0   | 1    | 67  | 24   | 2    | 11  | 0    | 1   | 0    | 0   | 0    | 0   | 106           |
| Inocybaceae sp            | Cluster636  | 0   | 45   | 0   | 0    | 3    | 0   | 0    | 0   | 0    | 0   | 13   | 44  | 105           |
| uncultured fungus         | Cluster369  | 0   | 0    | 35  | 59   | 0    | 0   | 3    | 1   | 1    | 0   | 0    | 0   | 99            |
| Xerocomus badius          | Cluster376  | 8   | 3    | 34  | 7    | 10   | 0   | 0    | 1   | 0    | 8   | 6    | 13  | 90            |
| Xerocomus badius          | Cluster732  | 10  | 0    | 0   | 0    | 2    | 0   | 0    | 0   | 1    | 35  | 38   | 1   | 87            |

|                        |             |    |    |    |    |    |    |    |    |    |    |    |    |    |
|------------------------|-------------|----|----|----|----|----|----|----|----|----|----|----|----|----|
| Amanita sp             | Cluster116  | 0  | 0  | 12 | 13 | 0  | 0  | 0  | 1  | 0  | 34 | 17 | 0  | 77 |
| Amanita rubescens      | Cluster127  | 10 | 8  | 4  | 5  | 13 | 3  | 7  | 9  | 9  | 1  | 0  | 4  | 73 |
| uncultured fungus      | Cluster1234 | 3  | 3  | 6  | 3  | 30 | 0  | 6  | 0  | 1  | 5  | 13 | 2  | 72 |
| Mortierella humilis    | Cluster838  | 2  | 6  | 20 | 7  | 2  | 0  | 12 | 5  | 4  | 4  | 1  | 7  | 70 |
| Atheliales sp          | Cluster601  | 0  | 29 | 9  | 17 | 2  | 0  | 0  | 0  | 0  | 3  | 1  | 7  | 68 |
| Inocybe assimilata     | Cluster855  | 0  | 0  | 15 | 11 | 0  | 16 | 23 | 0  | 0  | 0  | 0  | 3  | 68 |
| Scleroderma citrinum   | Cluster716  | 16 | 0  | 0  | 0  | 14 | 9  | 5  | 6  | 5  | 0  | 0  | 0  | 55 |
| Amanita rubescens      | Cluster113  | 11 | 3  | 3  | 3  | 14 | 1  | 6  | 5  | 7  | 0  | 0  | 1  | 54 |
| Atheliales sp          | Cluster416  | 0  | 25 | 9  | 10 | 0  | 0  | 0  | 0  | 0  | 0  | 0  | 10 | 54 |
| Cryptococcus terricola | Cluster876  | 1  | 4  | 1  | 9  | 6  | 2  | 4  | 0  | 2  | 12 | 11 | 2  | 54 |
| Thelephoraceae sp      | Cluster399  | 0  | 0  | 15 | 28 | 0  | 0  | 1  | 0  | 0  | 8  | 0  | 0  | 52 |
| Atheliales sp          | Cluster1054 | 0  | 13 | 5  | 14 | 0  | 0  | 0  | 0  | 0  | 3  | 0  | 14 | 49 |
| Mortierellales sp GD9A | Cluster1239 | 0  | 7  | 1  | 0  | 6  | 2  | 12 | 3  | 11 | 0  | 2  | 5  | 49 |
| Atheliales sp          | Cluster367  | 0  | 27 | 1  | 0  | 1  | 0  | 1  | 0  | 0  | 0  | 0  | 18 | 48 |
| Atheliales sp          | Cluster850  | 0  | 15 | 5  | 15 | 0  | 0  | 0  | 0  | 0  | 2  | 2  | 9  | 48 |
| Gloniaceae sp          | Cluster1192 | 2  | 1  | 0  | 3  | 7  | 5  | 2  | 4  | 1  | 13 | 9  | 1  | 48 |
| uncultured fungus      | Cluster546  | 0  | 0  | 18 | 26 | 0  | 0  | 0  | 0  | 0  | 2  | 0  | 0  | 46 |
| uncultured fungus      | Cluster861  | 3  | 5  | 2  | 2  | 2  | 4  | 15 | 2  | 4  | 0  | 3  | 4  | 46 |
| Inocybaceae sp         | Cluster541  | 0  | 17 | 4  | 0  | 0  | 0  | 0  | 0  | 0  | 0  | 2  | 22 | 45 |
| Inocybe assimilata     | Cluster939  | 1  | 3  | 7  | 8  | 0  | 13 | 10 | 0  | 1  | 0  | 0  | 2  | 45 |
| Atheliales sp          | Cluster1081 | 0  | 0  | 2  | 4  | 0  | 0  | 0  | 0  | 0  | 23 | 16 | 0  | 45 |
| Gloniaceae sp          | Cluster1289 | 6  | 1  | 2  | 0  | 11 | 2  | 2  | 2  | 9  | 5  | 1  | 4  | 45 |
| Amanita sp             | Cluster75   | 2  | 0  | 11 | 7  | 0  | 0  | 0  | 0  | 0  | 11 | 11 | 0  | 42 |
| Laccaria laccata       | Cluster79   | 2  | 0  | 0  | 0  | 9  | 0  | 1  | 10 | 20 | 0  | 0  | 0  | 42 |
| Amanita rubescens      | Cluster539  | 5  | 4  | 6  | 3  | 14 | 0  | 3  | 2  | 4  | 0  | 0  | 1  | 42 |
| Meliniomyces bicolor   | Cluster984  | 0  | 0  | 5  | 1  | 0  | 0  | 0  | 19 | 16 | 0  | 0  | 1  | 42 |
| Gloniaceae sp          | Cluster1190 | 0  | 0  | 29 | 10 | 0  | 0  | 0  | 1  | 0  | 2  | 0  | 0  | 42 |
| Laccaria laccata       | Cluster128  | 1  | 0  | 0  | 1  | 9  | 1  | 0  | 17 | 11 | 0  | 0  | 0  | 40 |
| Inocybe assimilata     | Cluster791  | 0  | 3  | 3  | 9  | 0  | 10 | 14 | 0  | 0  | 0  | 0  | 1  | 40 |

|                               |             |   |    |    |   |    |   |    |    |   |    |    |    |    |
|-------------------------------|-------------|---|----|----|---|----|---|----|----|---|----|----|----|----|
| uncultured fungus             | Cluster1567 | 1 | 3  | 3  | 1 | 3  | 1 | 3  | 3  | 1 | 11 | 10 | 0  | 40 |
| Atheliales sp                 | Cluster739  | 0 | 19 | 4  | 6 | 0  | 0 | 0  | 0  | 0 | 0  | 1  | 9  | 39 |
| Hypocrea koningii             | Cluster432  | 5 | 0  | 0  | 0 | 6  | 0 | 2  | 4  | 3 | 16 | 2  | 0  | 38 |
| Sebacinaceae sp               | Cluster690  | 0 | 6  | 9  | 8 | 0  | 0 | 2  | 0  | 0 | 3  | 5  | 4  | 37 |
| Oidiodendron chlamydosporicum | Cluster974  | 0 | 10 | 3  | 2 | 6  | 0 | 0  | 1  | 1 | 2  | 10 | 2  | 37 |
| uncultured fungus             | Cluster1707 | 0 | 2  | 4  | 0 | 1  | 0 | 2  | 0  | 2 | 11 | 13 | 2  | 37 |
| Laccaria laccata              | Cluster134  | 3 | 0  | 0  | 0 | 13 | 0 | 1  | 12 | 6 | 0  | 0  | 0  | 35 |
| Amanita rubescens             | Cluster223  | 8 | 1  | 1  | 0 | 7  | 1 | 7  | 4  | 2 | 2  | 0  | 1  | 34 |
| uncultured Trechisporales     | Cluster337  | 0 | 6  | 0  | 2 | 0  | 0 | 0  | 0  | 0 | 2  | 0  | 24 | 34 |
| Atheliales sp                 | Cluster945  | 0 | 0  | 2  | 3 | 0  | 0 | 0  | 0  | 0 | 17 | 11 | 0  | 33 |
| Amanita rubescens             | Cluster46   | 4 | 2  | 1  | 2 | 7  | 3 | 5  | 2  | 4 | 0  | 0  | 1  | 31 |
| Amanita sp                    | Cluster138  | 0 | 10 | 0  | 0 | 0  | 0 | 0  | 3  | 9 | 0  | 0  | 8  | 30 |
| Helotiales sp                 | Cluster424  | 0 | 2  | 2  | 6 | 0  | 0 | 0  | 2  | 0 | 3  | 4  | 11 | 30 |
| Scleroderma citrinum          | Cluster646  | 7 | 0  | 0  | 0 | 5  | 8 | 9  | 0  | 1 | 0  | 0  | 0  | 30 |
| Amanita sp                    | Cluster74   | 0 | 0  | 3  | 7 | 0  | 0 | 0  | 0  | 0 | 13 | 6  | 0  | 29 |
| Russulaceae sp                | Cluster422  | 0 | 0  | 0  | 1 | 0  | 9 | 13 | 5  | 1 | 0  | 0  | 0  | 29 |
| Inocybaceae sp                | Cluster787  | 0 | 9  | 1  | 0 | 0  | 0 | 0  | 0  | 0 | 2  | 4  | 13 | 29 |
| uncultured Basidiomycota      | Cluster669  | 0 | 18 | 4  | 0 | 0  | 0 | 0  | 0  | 0 | 0  | 5  | 1  | 28 |
| Xerocomus pruinatus           | Cluster313  | 1 | 4  | 11 | 4 | 0  | 0 | 0  | 1  | 0 | 0  | 0  | 6  | 27 |
| Atheliales sp                 | Cluster1123 | 0 | 0  | 0  | 5 | 1  | 0 | 0  | 0  | 0 | 8  | 13 | 0  | 27 |
| Amanita rubescens             | Cluster230  | 9 | 3  | 0  | 0 | 3  | 0 | 6  | 2  | 1 | 0  | 0  | 2  | 26 |
| Atheliales sp                 | Cluster494  | 0 | 5  | 2  | 9 | 0  | 0 | 0  | 0  | 0 | 0  | 1  | 9  | 26 |
| uncultured fungus             | Cluster685  | 0 | 8  | 3  | 9 | 0  | 0 | 0  | 0  | 0 | 0  | 2  | 3  | 25 |
| Atheliales sp                 | Cluster1250 | 0 | 0  | 1  | 1 | 0  | 0 | 0  | 0  | 0 | 11 | 12 | 0  | 25 |
| Cryptococcus podzolicus       | Cluster1718 | 1 | 10 | 2  | 2 | 1  | 0 | 1  | 1  | 2 | 4  | 1  | 0  | 25 |

ads
